# Supplementary material for: A multi-scale molecular dynamics simulation of PMAL facilitated delivery of siRNA
Source: Royal Society of Chemistry journal article supplement (doi:10.1039/c5ra10965e), 2015-01-01
Supplement: c5ra10965e1.pdf [file c5ra10965e1.pdf]

;;; CHARMM coarse-grained topology

[ moleculetype ]

; Name nrexcl  
PMAL 3

[ atoms ]

| ; nr      | type         | resnr    | residue | atom | cgnr | charge | mass |
|-----------|--------------|----------|---------|------|------|--------|------|
| typeB     | chargeB      | massB    |         |      |      |        |      |
| ; residue | 1 MALH       | rtp MALH | q 0.0   |      |      |        |      |
| 1         | CT2          | 1        | MALH    | C1   | 1    | -0.18  |      |
| 12.011    | ; qtot -0.18 |          |         |      |      |        |      |
| 2         | HB           | 1        | MALH    | H1A  | 2    | 0.09   |      |
| 1.008     | ; qtot -0.09 |          |         |      |      |        |      |
| 3         | HB           | 1        | MALH    | H1B  | 3    | 0.09   |      |
| 1.008     | ; qtot 0     |          |         |      |      |        |      |
| 4         | C            | 1        | MALH    | C12  | 4    | 0.51   |      |
| 12.011    | ; qtot 0.51  |          |         |      |      |        |      |
| 5         | O            | 1        | MALH    | O12  | 5    | -0.51  |      |
| 15.999    | ; qtot 0     |          |         |      |      |        |      |
| 6         | NH1          | 1        | MALH    | N1   | 6    | -0.47  |      |
| 14.007    | ; qtot -0.47 |          |         |      |      |        |      |
| 7         | H            | 1        | MALH    | HN1  | 7    | 0.31   |      |
| 1.008     | ; qtot -0.16 |          |         |      |      |        |      |
| 8         | CT2          | 1        | MALH    | C13  | 8    | -0.02  |      |
| 12.011    | ; qtot -0.18 |          |         |      |      |        |      |
| 9         | HB           | 1        | MALH    | H13A | 9    | 0.09   |      |
| 1.008     | ; qtot -0.09 |          |         |      |      |        |      |
| 10        | HB           | 1        | MALH    | H13B | 10   | 0.09   |      |
| 1.008     | ; qtot 0     |          |         |      |      |        |      |
| 11        | CTL2         | 1        | MALH    | C14  | 11   | -0.18  |      |
| 12.011    | ; qtot -0.18 |          |         |      |      |        |      |
| 12        | HAL2         | 1        | MALH    | H14A | 12   | 0.09   |      |
| 1.008     | ; qtot -0.09 |          |         |      |      |        |      |
| 13        | HAL2         | 1        | MALH    | H14B | 13   | 0.09   |      |
| 1.008     | ; qtot 0     |          |         |      |      |        |      |
| 14        | CTL2         | 1        | MALH    | C15  | 14   | -0.1   |      |
| 12.011    | ; qtot -0.1  |          |         |      |      |        |      |
| 15        | HAL2         | 1        | MALH    | H15A | 15   | 0.25   |      |
| 1.008     | ; qtot 0.15  |          |         |      |      |        |      |
| 16        | HAL2         | 1        | MALH    | H15B | 16   | 0.25   |      |
| 1.008     | ; qtot 0.4   |          |         |      |      |        |      |
| 17        | NTL          | 1        | MALH    | N2   | 17   | -0.6   |      |
| 14.007    | ; qtot -0.2  |          |         |      |      |        |      |
| 18        | CTL5         | 1        | MALH    | C16  | 18   | -0.35  |      |
| 12.011    | ; qtot -0.55 |          |         |      |      |        |      |
| 19        | HL           | 1        | MALH    | H16A | 19   | 0.25   |      |
| 1.008     | ; qtot -0.3  |          |         |      |      |        |      |
| 20        | HL           | 1        | MALH    | H16B | 20   | 0.25   |      |
| 1.008     | ; qtot -0.05 |          |         |      |      |        |      |
| 21        | HL           | 1        | MALH    | H16C | 21   | 0.25   |      |
| 1.008     | ; qtot 0.2   |          |         |      |      |        |      |
| 22        | CTL5         | 1        | MALH    | C17  | 22   | -0.35  |      |

|        |              |   |      |      |    |       |
|--------|--------------|---|------|------|----|-------|
| 12.011 | ; qtot -0.15 |   |      |      |    |       |
| 23     | HL           | 1 | MALH | H17A | 23 | 0.25  |
| 1.008  | ; qtot 0.1   |   |      |      |    |       |
| 24     | HL           | 1 | MALH | H17B | 24 | 0.25  |
| 1.008  | ; qtot 0.35  |   |      |      |    |       |
| 25     | HL           | 1 | MALH | H17C | 25 | 0.25  |
| 1.008  | ; qtot 0.6   |   |      |      |    |       |
| 26     | CTL5         | 1 | MALH | C18  | 26 | -0.35 |
| 12.011 | ; qtot 0.25  |   |      |      |    |       |
| 27     | HL           | 1 | MALH | H18A | 27 | 0.25  |
| 1.008  | ; qtot 0.5   |   |      |      |    |       |
| 28     | HL           | 1 | MALH | H18B | 28 | 0.25  |
| 1.008  | ; qtot 0.75  |   |      |      |    |       |
| 29     | HL           | 1 | MALH | H18C | 29 | 0.25  |
| 1.008  | ; qtot 1     |   |      |      |    |       |
| 30     | CT1          | 1 | MALH | C2   | 30 | -0.09 |
| 12.011 | ; qtot 0.91  |   |      |      |    |       |
| 31     | HB           | 1 | MALH | H2   | 31 | 0.09  |
| 1.008  | ; qtot 1     |   |      |      |    |       |
| 32     | CC           | 1 | MALH | C21  | 32 | 0.34  |
| 12.011 | ; qtot 1.34  |   |      |      |    |       |
| 33     | OC           | 1 | MALH | O21  | 33 | -0.67 |
| 15.999 | ; qtot 0.67  |   |      |      |    |       |
| 34     | OC           | 1 | MALH | O22  | 34 | -0.67 |
| 15.999 | ; qtot 0     |   |      |      |    |       |
| 35     | CTL2         | 1 | MALH | C3   | 35 | -0.18 |
| 12.011 | ; qtot -0.18 |   |      |      |    |       |
| 36     | HAL2         | 1 | MALH | H3A  | 36 | 0.09  |
| 1.008  | ; qtot -0.09 |   |      |      |    |       |
| 37     | HAL2         | 1 | MALH | H3B  | 37 | 0.09  |
| 1.008  | ; qtot 0     |   |      |      |    |       |
| 38     | CTL1         | 1 | MALH | C4   | 38 | -0.09 |
| 12.011 | ; qtot -0.09 |   |      |      |    |       |
| 39     | HAL1         | 1 | MALH | H4A  | 39 | 0.09  |
| 1.008  | ; qtot 0     |   |      |      |    |       |
| 40     | CTL2         | 1 | MALH | C41  | 40 | -0.18 |
| 12.011 | ; qtot -0.18 |   |      |      |    |       |
| 41     | HAL2         | 1 | MALH | H41A | 41 | 0.09  |
| 1.008  | ; qtot -0.09 |   |      |      |    |       |
| 42     | HAL2         | 1 | MALH | H41B | 42 | 0.09  |
| 1.008  | ; qtot 0     |   |      |      |    |       |
| 43     | CTL2         | 1 | MALH | C42  | 43 | -0.18 |
| 12.011 | ; qtot -0.18 |   |      |      |    |       |
| 44     | HAL2         | 1 | MALH | H42A | 44 | 0.09  |
| 1.008  | ; qtot -0.09 |   |      |      |    |       |
| 45     | HAL2         | 1 | MALH | H42B | 45 | 0.09  |
| 1.008  | ; qtot 0     |   |      |      |    |       |
| 46     | CTL2         | 1 | MALH | C43  | 46 | -0.18 |
| 12.011 | ; qtot -0.18 |   |      |      |    |       |
| 47     | HAL2         | 1 | MALH | H43A | 47 | 0.09  |
| 1.008  | ; qtot -0.09 |   |      |      |    |       |
| 48     | HAL2         | 1 | MALH | H43B | 48 | 0.09  |
| 1.008  | ; qtot 0     |   |      |      |    |       |
| 49     | CTL2         | 1 | MALH | C44  | 49 | -0.18 |

|        |                         |   |      |      |    |       |  |
|--------|-------------------------|---|------|------|----|-------|--|
| 12.011 | ; qtot -0.18            |   |      |      |    |       |  |
| 50     | HAL2                    | 1 | MALH | H44A | 50 | 0.09  |  |
| 1.008  | ; qtot -0.09            |   |      |      |    |       |  |
| 51     | HAL2                    | 1 | MALH | H44B | 51 | 0.09  |  |
| 1.008  | ; qtot 0                |   |      |      |    |       |  |
| 52     | CTL2                    | 1 | MALH | C45  | 52 | -0.18 |  |
| 12.011 | ; qtot -0.18            |   |      |      |    |       |  |
| 53     | HAL2                    | 1 | MALH | H45A | 53 | 0.09  |  |
| 1.008  | ; qtot -0.09            |   |      |      |    |       |  |
| 54     | HAL2                    | 1 | MALH | H45B | 54 | 0.09  |  |
| 1.008  | ; qtot 0                |   |      |      |    |       |  |
| 55     | CTL2                    | 1 | MALH | C46  | 55 | -0.18 |  |
| 12.011 | ; qtot -0.18            |   |      |      |    |       |  |
| 56     | HAL2                    | 1 | MALH | H46A | 56 | 0.09  |  |
| 1.008  | ; qtot -0.09            |   |      |      |    |       |  |
| 57     | HAL2                    | 1 | MALH | H46B | 57 | 0.09  |  |
| 1.008  | ; qtot 0                |   |      |      |    |       |  |
| 58     | CTL2                    | 1 | MALH | C47  | 58 | -0.18 |  |
| 12.011 | ; qtot -0.18            |   |      |      |    |       |  |
| 59     | HAL2                    | 1 | MALH | H47A | 59 | 0.09  |  |
| 1.008  | ; qtot -0.09            |   |      |      |    |       |  |
| 60     | HAL2                    | 1 | MALH | H47B | 60 | 0.09  |  |
| 1.008  | ; qtot 0                |   |      |      |    |       |  |
| 61     | CTL3                    | 1 | MALH | C48  | 61 | -0.27 |  |
| 12.011 | ; qtot -0.27            |   |      |      |    |       |  |
| 62     | HAL3                    | 1 | MALH | H48A | 62 | 0.09  |  |
| 1.008  | ; qtot -0.18            |   |      |      |    |       |  |
| 63     | HAL3                    | 1 | MALH | H48B | 63 | 0.09  |  |
| 1.008  | ; qtot -0.09            |   |      |      |    |       |  |
| 64     | HAL3                    | 1 | MALH | H48C | 64 | 0.09  |  |
| 1.008  | ; qtot 0                |   |      |      |    |       |  |
|        | ; residue 2 MAL rtp MAL |   | q    | 0.0  |    |       |  |
| 65     | CT1                     | 2 | MAL  | C1   | 65 | -0.09 |  |
| 12.011 | ; qtot -0.09            |   |      |      |    |       |  |
| 66     | HB                      | 2 | MAL  | H1A  | 66 | 0.09  |  |
| 1.008  | ; qtot 0                |   |      |      |    |       |  |
| 67     | C                       | 2 | MAL  | C12  | 67 | 0.51  |  |
| 12.011 | ; qtot 0.51             |   |      |      |    |       |  |
| 68     | 0                       | 2 | MAL  | 012  | 68 | -0.51 |  |
| 15.999 | ; qtot 0                |   |      |      |    |       |  |
| 69     | NH1                     | 2 | MAL  | N1   | 69 | -0.47 |  |
| 14.007 | ; qtot -0.47            |   |      |      |    |       |  |
| 70     | H                       | 2 | MAL  | HN1  | 70 | 0.31  |  |
| 1.008  | ; qtot -0.16            |   |      |      |    |       |  |
| 71     | CT2                     | 2 | MAL  | C13  | 71 | -0.02 |  |
| 12.011 | ; qtot -0.18            |   |      |      |    |       |  |
| 72     | HB                      | 2 | MAL  | H13A | 72 | 0.09  |  |
| 1.008  | ; qtot -0.09            |   |      |      |    |       |  |
| 73     | HB                      | 2 | MAL  | H13B | 73 | 0.09  |  |
| 1.008  | ; qtot 0                |   |      |      |    |       |  |
| 74     | CTL2                    | 2 | MAL  | C14  | 74 | -0.18 |  |
| 12.011 | ; qtot -0.18            |   |      |      |    |       |  |
| 75     | HAL2                    | 2 | MAL  | H14A | 75 | 0.09  |  |
| 1.008  | ; qtot -0.09            |   |      |      |    |       |  |

|        |              |   |     |      |     |       |
|--------|--------------|---|-----|------|-----|-------|
| 76     | HAL2         | 2 | MAL | H14B | 76  | 0.09  |
| 1.008  | ; qtot 0     |   |     |      |     |       |
| 77     | CTL2         | 2 | MAL | C15  | 77  | -0.1  |
| 12.011 | ; qtot -0.1  |   |     |      |     |       |
| 78     | HAL2         | 2 | MAL | H15A | 78  | 0.25  |
| 1.008  | ; qtot 0.15  |   |     |      |     |       |
| 79     | HAL2         | 2 | MAL | H15B | 79  | 0.25  |
| 1.008  | ; qtot 0.4   |   |     |      |     |       |
| 80     | NTL          | 2 | MAL | N2   | 80  | -0.6  |
| 14.007 | ; qtot -0.2  |   |     |      |     |       |
| 81     | CTL5         | 2 | MAL | C16  | 81  | -0.35 |
| 12.011 | ; qtot -0.55 |   |     |      |     |       |
| 82     | HL           | 2 | MAL | H16A | 82  | 0.25  |
| 1.008  | ; qtot -0.3  |   |     |      |     |       |
| 83     | HL           | 2 | MAL | H16B | 83  | 0.25  |
| 1.008  | ; qtot -0.05 |   |     |      |     |       |
| 84     | HL           | 2 | MAL | H16C | 84  | 0.25  |
| 1.008  | ; qtot 0.2   |   |     |      |     |       |
| 85     | CTL5         | 2 | MAL | C17  | 85  | -0.35 |
| 12.011 | ; qtot -0.15 |   |     |      |     |       |
| 86     | HL           | 2 | MAL | H17A | 86  | 0.25  |
| 1.008  | ; qtot 0.1   |   |     |      |     |       |
| 87     | HL           | 2 | MAL | H17B | 87  | 0.25  |
| 1.008  | ; qtot 0.35  |   |     |      |     |       |
| 88     | HL           | 2 | MAL | H17C | 88  | 0.25  |
| 1.008  | ; qtot 0.6   |   |     |      |     |       |
| 89     | CTL5         | 2 | MAL | C18  | 89  | -0.35 |
| 12.011 | ; qtot 0.25  |   |     |      |     |       |
| 90     | HL           | 2 | MAL | H18A | 90  | 0.25  |
| 1.008  | ; qtot 0.5   |   |     |      |     |       |
| 91     | HL           | 2 | MAL | H18B | 91  | 0.25  |
| 1.008  | ; qtot 0.75  |   |     |      |     |       |
| 92     | HL           | 2 | MAL | H18C | 92  | 0.25  |
| 1.008  | ; qtot 1     |   |     |      |     |       |
| 93     | CT1          | 2 | MAL | C2   | 93  | -0.09 |
| 12.011 | ; qtot 0.91  |   |     |      |     |       |
| 94     | HB           | 2 | MAL | H2   | 94  | 0.09  |
| 1.008  | ; qtot 1     |   |     |      |     |       |
| 95     | CC           | 2 | MAL | C21  | 95  | 0.34  |
| 12.011 | ; qtot 1.34  |   |     |      |     |       |
| 96     | OC           | 2 | MAL | O21  | 96  | -0.67 |
| 15.999 | ; qtot 0.67  |   |     |      |     |       |
| 97     | OC           | 2 | MAL | O22  | 97  | -0.67 |
| 15.999 | ; qtot 0     |   |     |      |     |       |
| 98     | CTL2         | 2 | MAL | C3   | 98  | -0.18 |
| 12.011 | ; qtot -0.18 |   |     |      |     |       |
| 99     | HAL2         | 2 | MAL | H3A  | 99  | 0.09  |
| 1.008  | ; qtot -0.09 |   |     |      |     |       |
| 100    | HAL2         | 2 | MAL | H3B  | 100 | 0.09  |
| 1.008  | ; qtot 0     |   |     |      |     |       |
| 101    | CTL1         | 2 | MAL | C4   | 101 | -0.09 |
| 12.011 | ; qtot -0.09 |   |     |      |     |       |
| 102    | HAL1         | 2 | MAL | H4A  | 102 | 0.09  |
| 1.008  | ; qtot 0     |   |     |      |     |       |

|                               |              |   |     |      |     |       |
|-------------------------------|--------------|---|-----|------|-----|-------|
| 103                           | CTL2         | 2 | MAL | C41  | 103 | -0.18 |
| 12.011                        | ; qtot -0.18 |   |     |      |     |       |
| 104                           | HAL2         | 2 | MAL | H41A | 104 | 0.09  |
| 1.008                         | ; qtot -0.09 |   |     |      |     |       |
| 105                           | HAL2         | 2 | MAL | H41B | 105 | 0.09  |
| 1.008                         | ; qtot 0     |   |     |      |     |       |
| 106                           | CTL2         | 2 | MAL | C42  | 106 | -0.18 |
| 12.011                        | ; qtot -0.18 |   |     |      |     |       |
| 107                           | HAL2         | 2 | MAL | H42A | 107 | 0.09  |
| 1.008                         | ; qtot -0.09 |   |     |      |     |       |
| 108                           | HAL2         | 2 | MAL | H42B | 108 | 0.09  |
| 1.008                         | ; qtot 0     |   |     |      |     |       |
| 109                           | CTL2         | 2 | MAL | C43  | 109 | -0.18 |
| 12.011                        | ; qtot -0.18 |   |     |      |     |       |
| 110                           | HAL2         | 2 | MAL | H43A | 110 | 0.09  |
| 1.008                         | ; qtot -0.09 |   |     |      |     |       |
| 111                           | HAL2         | 2 | MAL | H43B | 111 | 0.09  |
| 1.008                         | ; qtot 0     |   |     |      |     |       |
| 112                           | CTL2         | 2 | MAL | C44  | 112 | -0.18 |
| 12.011                        | ; qtot -0.18 |   |     |      |     |       |
| 113                           | HAL2         | 2 | MAL | H44A | 113 | 0.09  |
| 1.008                         | ; qtot -0.09 |   |     |      |     |       |
| 114                           | HAL2         | 2 | MAL | H44B | 114 | 0.09  |
| 1.008                         | ; qtot 0     |   |     |      |     |       |
| 115                           | CTL2         | 2 | MAL | C45  | 115 | -0.18 |
| 12.011                        | ; qtot -0.18 |   |     |      |     |       |
| 116                           | HAL2         | 2 | MAL | H45A | 116 | 0.09  |
| 1.008                         | ; qtot -0.09 |   |     |      |     |       |
| 117                           | HAL2         | 2 | MAL | H45B | 117 | 0.09  |
| 1.008                         | ; qtot 0     |   |     |      |     |       |
| 118                           | CTL2         | 2 | MAL | C46  | 118 | -0.18 |
| 12.011                        | ; qtot -0.18 |   |     |      |     |       |
| 119                           | HAL2         | 2 | MAL | H46A | 119 | 0.09  |
| 1.008                         | ; qtot -0.09 |   |     |      |     |       |
| 120                           | HAL2         | 2 | MAL | H46B | 120 | 0.09  |
| 1.008                         | ; qtot 0     |   |     |      |     |       |
| 121                           | CTL2         | 2 | MAL | C47  | 121 | -0.18 |
| 12.011                        | ; qtot -0.18 |   |     |      |     |       |
| 122                           | HAL2         | 2 | MAL | H47A | 122 | 0.09  |
| 1.008                         | ; qtot -0.09 |   |     |      |     |       |
| 123                           | HAL2         | 2 | MAL | H47B | 123 | 0.09  |
| 1.008                         | ; qtot 0     |   |     |      |     |       |
| 124                           | CTL3         | 2 | MAL | C48  | 124 | -0.27 |
| 12.011                        | ; qtot -0.27 |   |     |      |     |       |
| 125                           | HAL3         | 2 | MAL | H48A | 125 | 0.09  |
| 1.008                         | ; qtot -0.18 |   |     |      |     |       |
| 126                           | HAL3         | 2 | MAL | H48B | 126 | 0.09  |
| 1.008                         | ; qtot -0.09 |   |     |      |     |       |
| 127                           | HAL3         | 2 | MAL | H48C | 127 | 0.09  |
| 1.008                         | ; qtot 0     |   |     |      |     |       |
| ; residue 3 MAL rtp MAL q 0.0 |              |   |     |      |     |       |
| 128                           | CT1          | 3 | MAL | C1   | 128 | -0.09 |
| 12.011                        | ; qtot -0.09 |   |     |      |     |       |
| 129                           | HB           | 3 | MAL | H1A  | 129 | 0.09  |

|        |              |   |     |      |     |       |
|--------|--------------|---|-----|------|-----|-------|
| 1.008  | ; qtot 0     |   |     |      |     |       |
| 130    | C            | 3 | MAL | C12  | 130 | 0.51  |
| 12.011 | ; qtot 0.51  |   |     |      |     |       |
| 131    | 0            | 3 | MAL | 012  | 131 | -0.51 |
| 15.999 | ; qtot 0     |   |     |      |     |       |
| 132    | NH1          | 3 | MAL | N1   | 132 | -0.47 |
| 14.007 | ; qtot -0.47 |   |     |      |     |       |
| 133    | H            | 3 | MAL | HN1  | 133 | 0.31  |
| 1.008  | ; qtot -0.16 |   |     |      |     |       |
| 134    | CT2          | 3 | MAL | C13  | 134 | -0.02 |
| 12.011 | ; qtot -0.18 |   |     |      |     |       |
| 135    | HB           | 3 | MAL | H13A | 135 | 0.09  |
| 1.008  | ; qtot -0.09 |   |     |      |     |       |
| 136    | HB           | 3 | MAL | H13B | 136 | 0.09  |
| 1.008  | ; qtot 0     |   |     |      |     |       |
| 137    | CTL2         | 3 | MAL | C14  | 137 | -0.18 |
| 12.011 | ; qtot -0.18 |   |     |      |     |       |
| 138    | HAL2         | 3 | MAL | H14A | 138 | 0.09  |
| 1.008  | ; qtot -0.09 |   |     |      |     |       |
| 139    | HAL2         | 3 | MAL | H14B | 139 | 0.09  |
| 1.008  | ; qtot 0     |   |     |      |     |       |
| 140    | CTL2         | 3 | MAL | C15  | 140 | -0.1  |
| 12.011 | ; qtot -0.1  |   |     |      |     |       |
| 141    | HAL2         | 3 | MAL | H15A | 141 | 0.25  |
| 1.008  | ; qtot 0.15  |   |     |      |     |       |
| 142    | HAL2         | 3 | MAL | H15B | 142 | 0.25  |
| 1.008  | ; qtot 0.4   |   |     |      |     |       |
| 143    | NTL          | 3 | MAL | N2   | 143 | -0.6  |
| 14.007 | ; qtot -0.2  |   |     |      |     |       |
| 144    | CTL5         | 3 | MAL | C16  | 144 | -0.35 |
| 12.011 | ; qtot -0.55 |   |     |      |     |       |
| 145    | HL           | 3 | MAL | H16A | 145 | 0.25  |
| 1.008  | ; qtot -0.3  |   |     |      |     |       |
| 146    | HL           | 3 | MAL | H16B | 146 | 0.25  |
| 1.008  | ; qtot -0.05 |   |     |      |     |       |
| 147    | HL           | 3 | MAL | H16C | 147 | 0.25  |
| 1.008  | ; qtot 0.2   |   |     |      |     |       |
| 148    | CTL5         | 3 | MAL | C17  | 148 | -0.35 |
| 12.011 | ; qtot -0.15 |   |     |      |     |       |
| 149    | HL           | 3 | MAL | H17A | 149 | 0.25  |
| 1.008  | ; qtot 0.1   |   |     |      |     |       |
| 150    | HL           | 3 | MAL | H17B | 150 | 0.25  |
| 1.008  | ; qtot 0.35  |   |     |      |     |       |
| 151    | HL           | 3 | MAL | H17C | 151 | 0.25  |
| 1.008  | ; qtot 0.6   |   |     |      |     |       |
| 152    | CTL5         | 3 | MAL | C18  | 152 | -0.35 |
| 12.011 | ; qtot 0.25  |   |     |      |     |       |
| 153    | HL           | 3 | MAL | H18A | 153 | 0.25  |
| 1.008  | ; qtot 0.5   |   |     |      |     |       |
| 154    | HL           | 3 | MAL | H18B | 154 | 0.25  |
| 1.008  | ; qtot 0.75  |   |     |      |     |       |
| 155    | HL           | 3 | MAL | H18C | 155 | 0.25  |
| 1.008  | ; qtot 1     |   |     |      |     |       |
| 156    | CT1          | 3 | MAL | C2   | 156 | -0.09 |

|        |              |   |     |      |     |       |
|--------|--------------|---|-----|------|-----|-------|
| 12.011 | ; qtot 0.91  |   |     |      |     |       |
| 157    | HB           | 3 | MAL | H2   | 157 | 0.09  |
| 1.008  | ; qtot 1     |   |     |      |     |       |
| 158    | CC           | 3 | MAL | C21  | 158 | 0.34  |
| 12.011 | ; qtot 1.34  |   |     |      |     |       |
| 159    | OC           | 3 | MAL | O21  | 159 | -0.67 |
| 15.999 | ; qtot 0.67  |   |     |      |     |       |
| 160    | OC           | 3 | MAL | O22  | 160 | -0.67 |
| 15.999 | ; qtot 0     |   |     |      |     |       |
| 161    | CTL2         | 3 | MAL | C3   | 161 | -0.18 |
| 12.011 | ; qtot -0.18 |   |     |      |     |       |
| 162    | HAL2         | 3 | MAL | H3A  | 162 | 0.09  |
| 1.008  | ; qtot -0.09 |   |     |      |     |       |
| 163    | HAL2         | 3 | MAL | H3B  | 163 | 0.09  |
| 1.008  | ; qtot 0     |   |     |      |     |       |
| 164    | CTL1         | 3 | MAL | C4   | 164 | -0.09 |
| 12.011 | ; qtot -0.09 |   |     |      |     |       |
| 165    | HAL1         | 3 | MAL | H4A  | 165 | 0.09  |
| 1.008  | ; qtot 0     |   |     |      |     |       |
| 166    | CTL2         | 3 | MAL | C41  | 166 | -0.18 |
| 12.011 | ; qtot -0.18 |   |     |      |     |       |
| 167    | HAL2         | 3 | MAL | H41A | 167 | 0.09  |
| 1.008  | ; qtot -0.09 |   |     |      |     |       |
| 168    | HAL2         | 3 | MAL | H41B | 168 | 0.09  |
| 1.008  | ; qtot 0     |   |     |      |     |       |
| 169    | CTL2         | 3 | MAL | C42  | 169 | -0.18 |
| 12.011 | ; qtot -0.18 |   |     |      |     |       |
| 170    | HAL2         | 3 | MAL | H42A | 170 | 0.09  |
| 1.008  | ; qtot -0.09 |   |     |      |     |       |
| 171    | HAL2         | 3 | MAL | H42B | 171 | 0.09  |
| 1.008  | ; qtot 0     |   |     |      |     |       |
| 172    | CTL2         | 3 | MAL | C43  | 172 | -0.18 |
| 12.011 | ; qtot -0.18 |   |     |      |     |       |
| 173    | HAL2         | 3 | MAL | H43A | 173 | 0.09  |
| 1.008  | ; qtot -0.09 |   |     |      |     |       |
| 174    | HAL2         | 3 | MAL | H43B | 174 | 0.09  |
| 1.008  | ; qtot 0     |   |     |      |     |       |
| 175    | CTL2         | 3 | MAL | C44  | 175 | -0.18 |
| 12.011 | ; qtot -0.18 |   |     |      |     |       |
| 176    | HAL2         | 3 | MAL | H44A | 176 | 0.09  |
| 1.008  | ; qtot -0.09 |   |     |      |     |       |
| 177    | HAL2         | 3 | MAL | H44B | 177 | 0.09  |
| 1.008  | ; qtot 0     |   |     |      |     |       |
| 178    | CTL2         | 3 | MAL | C45  | 178 | -0.18 |
| 12.011 | ; qtot -0.18 |   |     |      |     |       |
| 179    | HAL2         | 3 | MAL | H45A | 179 | 0.09  |
| 1.008  | ; qtot -0.09 |   |     |      |     |       |
| 180    | HAL2         | 3 | MAL | H45B | 180 | 0.09  |
| 1.008  | ; qtot 0     |   |     |      |     |       |
| 181    | CTL2         | 3 | MAL | C46  | 181 | -0.18 |
| 12.011 | ; qtot -0.18 |   |     |      |     |       |
| 182    | HAL2         | 3 | MAL | H46A | 182 | 0.09  |
| 1.008  | ; qtot -0.09 |   |     |      |     |       |
| 183    | HAL2         | 3 | MAL | H46B | 183 | 0.09  |

|        |                               |   |     |      |     |       |  |
|--------|-------------------------------|---|-----|------|-----|-------|--|
| 1.008  | ; qtot 0                      |   |     |      |     |       |  |
| 184    | CTL2                          | 3 | MAL | C47  | 184 | -0.18 |  |
| 12.011 | ; qtot -0.18                  |   |     |      |     |       |  |
| 185    | HAL2                          | 3 | MAL | H47A | 185 | 0.09  |  |
| 1.008  | ; qtot -0.09                  |   |     |      |     |       |  |
| 186    | HAL2                          | 3 | MAL | H47B | 186 | 0.09  |  |
| 1.008  | ; qtot 0                      |   |     |      |     |       |  |
| 187    | CTL3                          | 3 | MAL | C48  | 187 | -0.27 |  |
| 12.011 | ; qtot -0.27                  |   |     |      |     |       |  |
| 188    | HAL3                          | 3 | MAL | H48A | 188 | 0.09  |  |
| 1.008  | ; qtot -0.18                  |   |     |      |     |       |  |
| 189    | HAL3                          | 3 | MAL | H48B | 189 | 0.09  |  |
| 1.008  | ; qtot -0.09                  |   |     |      |     |       |  |
| 190    | HAL3                          | 3 | MAL | H48C | 190 | 0.09  |  |
| 1.008  | ; qtot 0                      |   |     |      |     |       |  |
|        | ; residue 4 MAL rtp MAL q 0.0 |   |     |      |     |       |  |
| 191    | CT1                           | 4 | MAL | C1   | 191 | -0.09 |  |
| 12.011 | ; qtot -0.09                  |   |     |      |     |       |  |
| 192    | HB                            | 4 | MAL | H1A  | 192 | 0.09  |  |
| 1.008  | ; qtot 0                      |   |     |      |     |       |  |
| 193    | C                             | 4 | MAL | C12  | 193 | 0.51  |  |
| 12.011 | ; qtot 0.51                   |   |     |      |     |       |  |
| 194    | 0                             | 4 | MAL | 012  | 194 | -0.51 |  |
| 15.999 | ; qtot 0                      |   |     |      |     |       |  |
| 195    | NH1                           | 4 | MAL | N1   | 195 | -0.47 |  |
| 14.007 | ; qtot -0.47                  |   |     |      |     |       |  |
| 196    | H                             | 4 | MAL | HN1  | 196 | 0.31  |  |
| 1.008  | ; qtot -0.16                  |   |     |      |     |       |  |
| 197    | CT2                           | 4 | MAL | C13  | 197 | -0.02 |  |
| 12.011 | ; qtot -0.18                  |   |     |      |     |       |  |
| 198    | HB                            | 4 | MAL | H13A | 198 | 0.09  |  |
| 1.008  | ; qtot -0.09                  |   |     |      |     |       |  |
| 199    | HB                            | 4 | MAL | H13B | 199 | 0.09  |  |
| 1.008  | ; qtot 0                      |   |     |      |     |       |  |
| 200    | CTL2                          | 4 | MAL | C14  | 200 | -0.18 |  |
| 12.011 | ; qtot -0.18                  |   |     |      |     |       |  |
| 201    | HAL2                          | 4 | MAL | H14A | 201 | 0.09  |  |
| 1.008  | ; qtot -0.09                  |   |     |      |     |       |  |
| 202    | HAL2                          | 4 | MAL | H14B | 202 | 0.09  |  |
| 1.008  | ; qtot 0                      |   |     |      |     |       |  |
| 203    | CTL2                          | 4 | MAL | C15  | 203 | -0.1  |  |
| 12.011 | ; qtot -0.1                   |   |     |      |     |       |  |
| 204    | HAL2                          | 4 | MAL | H15A | 204 | 0.25  |  |
| 1.008  | ; qtot 0.15                   |   |     |      |     |       |  |
| 205    | HAL2                          | 4 | MAL | H15B | 205 | 0.25  |  |
| 1.008  | ; qtot 0.4                    |   |     |      |     |       |  |
| 206    | NTL                           | 4 | MAL | N2   | 206 | -0.6  |  |
| 14.007 | ; qtot -0.2                   |   |     |      |     |       |  |
| 207    | CTL5                          | 4 | MAL | C16  | 207 | -0.35 |  |
| 12.011 | ; qtot -0.55                  |   |     |      |     |       |  |
| 208    | HL                            | 4 | MAL | H16A | 208 | 0.25  |  |
| 1.008  | ; qtot -0.3                   |   |     |      |     |       |  |
| 209    | HL                            | 4 | MAL | H16B | 209 | 0.25  |  |
| 1.008  | ; qtot -0.05                  |   |     |      |     |       |  |



|        |              |   |     |      |     |       |
|--------|--------------|---|-----|------|-----|-------|
| 210    | HL           | 4 | MAL | H16C | 210 | 0.25  |
| 1.008  | ; qtot 0.2   |   |     |      |     |       |
| 211    | CTL5         | 4 | MAL | C17  | 211 | -0.35 |
| 12.011 | ; qtot -0.15 |   |     |      |     |       |
| 212    | HL           | 4 | MAL | H17A | 212 | 0.25  |
| 1.008  | ; qtot 0.1   |   |     |      |     |       |
| 213    | HL           | 4 | MAL | H17B | 213 | 0.25  |
| 1.008  | ; qtot 0.35  |   |     |      |     |       |
| 214    | HL           | 4 | MAL | H17C | 214 | 0.25  |
| 1.008  | ; qtot 0.6   |   |     |      |     |       |
| 215    | CTL5         | 4 | MAL | C18  | 215 | -0.35 |
| 12.011 | ; qtot 0.25  |   |     |      |     |       |
| 216    | HL           | 4 | MAL | H18A | 216 | 0.25  |
| 1.008  | ; qtot 0.5   |   |     |      |     |       |
| 217    | HL           | 4 | MAL | H18B | 217 | 0.25  |
| 1.008  | ; qtot 0.75  |   |     |      |     |       |
| 218    | HL           | 4 | MAL | H18C | 218 | 0.25  |
| 1.008  | ; qtot 1     |   |     |      |     |       |
| 219    | CT1          | 4 | MAL | C2   | 219 | -0.09 |
| 12.011 | ; qtot 0.91  |   |     |      |     |       |
| 220    | HB           | 4 | MAL | H2   | 220 | 0.09  |
| 1.008  | ; qtot 1     |   |     |      |     |       |
| 221    | CC           | 4 | MAL | C21  | 221 | 0.34  |
| 12.011 | ; qtot 1.34  |   |     |      |     |       |
| 222    | OC           | 4 | MAL | O21  | 222 | -0.67 |
| 15.999 | ; qtot 0.67  |   |     |      |     |       |
| 223    | OC           | 4 | MAL | O22  | 223 | -0.67 |
| 15.999 | ; qtot 0     |   |     |      |     |       |
| 224    | CTL2         | 4 | MAL | C3   | 224 | -0.18 |
| 12.011 | ; qtot -0.18 |   |     |      |     |       |
| 225    | HAL2         | 4 | MAL | H3A  | 225 | 0.09  |
| 1.008  | ; qtot -0.09 |   |     |      |     |       |
| 226    | HAL2         | 4 | MAL | H3B  | 226 | 0.09  |
| 1.008  | ; qtot 0     |   |     |      |     |       |
| 227    | CTL1         | 4 | MAL | C4   | 227 | -0.09 |
| 12.011 | ; qtot -0.09 |   |     |      |     |       |
| 228    | HAL1         | 4 | MAL | H4A  | 228 | 0.09  |
| 1.008  | ; qtot 0     |   |     |      |     |       |
| 229    | CTL2         | 4 | MAL | C41  | 229 | -0.18 |
| 12.011 | ; qtot -0.18 |   |     |      |     |       |
| 230    | HAL2         | 4 | MAL | H41A | 230 | 0.09  |
| 1.008  | ; qtot -0.09 |   |     |      |     |       |
| 231    | HAL2         | 4 | MAL | H41B | 231 | 0.09  |
| 1.008  | ; qtot 0     |   |     |      |     |       |
| 232    | CTL2         | 4 | MAL | C42  | 232 | -0.18 |
| 12.011 | ; qtot -0.18 |   |     |      |     |       |
| 233    | HAL2         | 4 | MAL | H42A | 233 | 0.09  |
| 1.008  | ; qtot -0.09 |   |     |      |     |       |
| 234    | HAL2         | 4 | MAL | H42B | 234 | 0.09  |
| 1.008  | ; qtot 0     |   |     |      |     |       |
| 235    | CTL2         | 4 | MAL | C43  | 235 | -0.18 |
| 12.011 | ; qtot -0.18 |   |     |      |     |       |
| 236    | HAL2         | 4 | MAL | H43A | 236 | 0.09  |
| 1.008  | ; qtot -0.09 |   |     |      |     |       |

|                               |              |   |     |      |     |       |
|-------------------------------|--------------|---|-----|------|-----|-------|
| 237                           | HAL2         | 4 | MAL | H43B | 237 | 0.09  |
| 1.008                         | ; qtot 0     |   |     |      |     |       |
| 238                           | CTL2         | 4 | MAL | C44  | 238 | -0.18 |
| 12.011                        | ; qtot -0.18 |   |     |      |     |       |
| 239                           | HAL2         | 4 | MAL | H44A | 239 | 0.09  |
| 1.008                         | ; qtot -0.09 |   |     |      |     |       |
| 240                           | HAL2         | 4 | MAL | H44B | 240 | 0.09  |
| 1.008                         | ; qtot 0     |   |     |      |     |       |
| 241                           | CTL2         | 4 | MAL | C45  | 241 | -0.18 |
| 12.011                        | ; qtot -0.18 |   |     |      |     |       |
| 242                           | HAL2         | 4 | MAL | H45A | 242 | 0.09  |
| 1.008                         | ; qtot -0.09 |   |     |      |     |       |
| 243                           | HAL2         | 4 | MAL | H45B | 243 | 0.09  |
| 1.008                         | ; qtot 0     |   |     |      |     |       |
| 244                           | CTL2         | 4 | MAL | C46  | 244 | -0.18 |
| 12.011                        | ; qtot -0.18 |   |     |      |     |       |
| 245                           | HAL2         | 4 | MAL | H46A | 245 | 0.09  |
| 1.008                         | ; qtot -0.09 |   |     |      |     |       |
| 246                           | HAL2         | 4 | MAL | H46B | 246 | 0.09  |
| 1.008                         | ; qtot 0     |   |     |      |     |       |
| 247                           | CTL2         | 4 | MAL | C47  | 247 | -0.18 |
| 12.011                        | ; qtot -0.18 |   |     |      |     |       |
| 248                           | HAL2         | 4 | MAL | H47A | 248 | 0.09  |
| 1.008                         | ; qtot -0.09 |   |     |      |     |       |
| 249                           | HAL2         | 4 | MAL | H47B | 249 | 0.09  |
| 1.008                         | ; qtot 0     |   |     |      |     |       |
| 250                           | CTL3         | 4 | MAL | C48  | 250 | -0.27 |
| 12.011                        | ; qtot -0.27 |   |     |      |     |       |
| 251                           | HAL3         | 4 | MAL | H48A | 251 | 0.09  |
| 1.008                         | ; qtot -0.18 |   |     |      |     |       |
| 252                           | HAL3         | 4 | MAL | H48B | 252 | 0.09  |
| 1.008                         | ; qtot -0.09 |   |     |      |     |       |
| 253                           | HAL3         | 4 | MAL | H48C | 253 | 0.09  |
| 1.008                         | ; qtot 0     |   |     |      |     |       |
| ; residue 5 MAL rtp MAL q 0.0 |              |   |     |      |     |       |
| 254                           | CT1          | 5 | MAL | C1   | 254 | -0.09 |
| 12.011                        | ; qtot -0.09 |   |     |      |     |       |
| 255                           | HB           | 5 | MAL | H1A  | 255 | 0.09  |
| 1.008                         | ; qtot 0     |   |     |      |     |       |
| 256                           | C            | 5 | MAL | C12  | 256 | 0.51  |
| 12.011                        | ; qtot 0.51  |   |     |      |     |       |
| 257                           | 0            | 5 | MAL | 012  | 257 | -0.51 |
| 15.999                        | ; qtot 0     |   |     |      |     |       |
| 258                           | NH1          | 5 | MAL | N1   | 258 | -0.47 |
| 14.007                        | ; qtot -0.47 |   |     |      |     |       |
| 259                           | H            | 5 | MAL | HN1  | 259 | 0.31  |
| 1.008                         | ; qtot -0.16 |   |     |      |     |       |
| 260                           | CT2          | 5 | MAL | C13  | 260 | -0.02 |
| 12.011                        | ; qtot -0.18 |   |     |      |     |       |
| 261                           | HB           | 5 | MAL | H13A | 261 | 0.09  |
| 1.008                         | ; qtot -0.09 |   |     |      |     |       |
| 262                           | HB           | 5 | MAL | H13B | 262 | 0.09  |
| 1.008                         | ; qtot 0     |   |     |      |     |       |
| 263                           | CTL2         | 5 | MAL | C14  | 263 | -0.18 |

|        |              |   |     |      |     |       |
|--------|--------------|---|-----|------|-----|-------|
| 12.011 | ; qtot -0.18 |   |     |      |     |       |
| 264    | HAL2         | 5 | MAL | H14A | 264 | 0.09  |
| 1.008  | ; qtot -0.09 |   |     |      |     |       |
| 265    | HAL2         | 5 | MAL | H14B | 265 | 0.09  |
| 1.008  | ; qtot 0     |   |     |      |     |       |
| 266    | CTL2         | 5 | MAL | C15  | 266 | -0.1  |
| 12.011 | ; qtot -0.1  |   |     |      |     |       |
| 267    | HAL2         | 5 | MAL | H15A | 267 | 0.25  |
| 1.008  | ; qtot 0.15  |   |     |      |     |       |
| 268    | HAL2         | 5 | MAL | H15B | 268 | 0.25  |
| 1.008  | ; qtot 0.4   |   |     |      |     |       |
| 269    | NTL          | 5 | MAL | N2   | 269 | -0.6  |
| 14.007 | ; qtot -0.2  |   |     |      |     |       |
| 270    | CTL5         | 5 | MAL | C16  | 270 | -0.35 |
| 12.011 | ; qtot -0.55 |   |     |      |     |       |
| 271    | HL           | 5 | MAL | H16A | 271 | 0.25  |
| 1.008  | ; qtot -0.3  |   |     |      |     |       |
| 272    | HL           | 5 | MAL | H16B | 272 | 0.25  |
| 1.008  | ; qtot -0.05 |   |     |      |     |       |
| 273    | HL           | 5 | MAL | H16C | 273 | 0.25  |
| 1.008  | ; qtot 0.2   |   |     |      |     |       |
| 274    | CTL5         | 5 | MAL | C17  | 274 | -0.35 |
| 12.011 | ; qtot -0.15 |   |     |      |     |       |
| 275    | HL           | 5 | MAL | H17A | 275 | 0.25  |
| 1.008  | ; qtot 0.1   |   |     |      |     |       |
| 276    | HL           | 5 | MAL | H17B | 276 | 0.25  |
| 1.008  | ; qtot 0.35  |   |     |      |     |       |
| 277    | HL           | 5 | MAL | H17C | 277 | 0.25  |
| 1.008  | ; qtot 0.6   |   |     |      |     |       |
| 278    | CTL5         | 5 | MAL | C18  | 278 | -0.35 |
| 12.011 | ; qtot 0.25  |   |     |      |     |       |
| 279    | HL           | 5 | MAL | H18A | 279 | 0.25  |
| 1.008  | ; qtot 0.5   |   |     |      |     |       |
| 280    | HL           | 5 | MAL | H18B | 280 | 0.25  |
| 1.008  | ; qtot 0.75  |   |     |      |     |       |
| 281    | HL           | 5 | MAL | H18C | 281 | 0.25  |
| 1.008  | ; qtot 1     |   |     |      |     |       |
| 282    | CT1          | 5 | MAL | C2   | 282 | -0.09 |
| 12.011 | ; qtot 0.91  |   |     |      |     |       |
| 283    | HB           | 5 | MAL | H2   | 283 | 0.09  |
| 1.008  | ; qtot 1     |   |     |      |     |       |
| 284    | CC           | 5 | MAL | C21  | 284 | 0.34  |
| 12.011 | ; qtot 1.34  |   |     |      |     |       |
| 285    | OC           | 5 | MAL | O21  | 285 | -0.67 |
| 15.999 | ; qtot 0.67  |   |     |      |     |       |
| 286    | OC           | 5 | MAL | O22  | 286 | -0.67 |
| 15.999 | ; qtot 0     |   |     |      |     |       |
| 287    | CTL2         | 5 | MAL | C3   | 287 | -0.18 |
| 12.011 | ; qtot -0.18 |   |     |      |     |       |
| 288    | HAL2         | 5 | MAL | H3A  | 288 | 0.09  |
| 1.008  | ; qtot -0.09 |   |     |      |     |       |
| 289    | HAL2         | 5 | MAL | H3B  | 289 | 0.09  |
| 1.008  | ; qtot 0     |   |     |      |     |       |
| 290    | CTL1         | 5 | MAL | C4   | 290 | -0.09 |

|                               |              |   |     |      |     |       |
|-------------------------------|--------------|---|-----|------|-----|-------|
| 12.011                        | ; qtot -0.09 |   |     |      |     |       |
| 291                           | HAL1         | 5 | MAL | H4A  | 291 | 0.09  |
| 1.008                         | ; qtot 0     |   |     |      |     |       |
| 292                           | CTL2         | 5 | MAL | C41  | 292 | -0.18 |
| 12.011                        | ; qtot -0.18 |   |     |      |     |       |
| 293                           | HAL2         | 5 | MAL | H41A | 293 | 0.09  |
| 1.008                         | ; qtot -0.09 |   |     |      |     |       |
| 294                           | HAL2         | 5 | MAL | H41B | 294 | 0.09  |
| 1.008                         | ; qtot 0     |   |     |      |     |       |
| 295                           | CTL2         | 5 | MAL | C42  | 295 | -0.18 |
| 12.011                        | ; qtot -0.18 |   |     |      |     |       |
| 296                           | HAL2         | 5 | MAL | H42A | 296 | 0.09  |
| 1.008                         | ; qtot -0.09 |   |     |      |     |       |
| 297                           | HAL2         | 5 | MAL | H42B | 297 | 0.09  |
| 1.008                         | ; qtot 0     |   |     |      |     |       |
| 298                           | CTL2         | 5 | MAL | C43  | 298 | -0.18 |
| 12.011                        | ; qtot -0.18 |   |     |      |     |       |
| 299                           | HAL2         | 5 | MAL | H43A | 299 | 0.09  |
| 1.008                         | ; qtot -0.09 |   |     |      |     |       |
| 300                           | HAL2         | 5 | MAL | H43B | 300 | 0.09  |
| 1.008                         | ; qtot 0     |   |     |      |     |       |
| 301                           | CTL2         | 5 | MAL | C44  | 301 | -0.18 |
| 12.011                        | ; qtot -0.18 |   |     |      |     |       |
| 302                           | HAL2         | 5 | MAL | H44A | 302 | 0.09  |
| 1.008                         | ; qtot -0.09 |   |     |      |     |       |
| 303                           | HAL2         | 5 | MAL | H44B | 303 | 0.09  |
| 1.008                         | ; qtot 0     |   |     |      |     |       |
| 304                           | CTL2         | 5 | MAL | C45  | 304 | -0.18 |
| 12.011                        | ; qtot -0.18 |   |     |      |     |       |
| 305                           | HAL2         | 5 | MAL | H45A | 305 | 0.09  |
| 1.008                         | ; qtot -0.09 |   |     |      |     |       |
| 306                           | HAL2         | 5 | MAL | H45B | 306 | 0.09  |
| 1.008                         | ; qtot 0     |   |     |      |     |       |
| 307                           | CTL2         | 5 | MAL | C46  | 307 | -0.18 |
| 12.011                        | ; qtot -0.18 |   |     |      |     |       |
| 308                           | HAL2         | 5 | MAL | H46A | 308 | 0.09  |
| 1.008                         | ; qtot -0.09 |   |     |      |     |       |
| 309                           | HAL2         | 5 | MAL | H46B | 309 | 0.09  |
| 1.008                         | ; qtot 0     |   |     |      |     |       |
| 310                           | CTL2         | 5 | MAL | C47  | 310 | -0.18 |
| 12.011                        | ; qtot -0.18 |   |     |      |     |       |
| 311                           | HAL2         | 5 | MAL | H47A | 311 | 0.09  |
| 1.008                         | ; qtot -0.09 |   |     |      |     |       |
| 312                           | HAL2         | 5 | MAL | H47B | 312 | 0.09  |
| 1.008                         | ; qtot 0     |   |     |      |     |       |
| 313                           | CTL3         | 5 | MAL | C48  | 313 | -0.27 |
| 12.011                        | ; qtot -0.27 |   |     |      |     |       |
| 314                           | HAL3         | 5 | MAL | H48A | 314 | 0.09  |
| 1.008                         | ; qtot -0.18 |   |     |      |     |       |
| 315                           | HAL3         | 5 | MAL | H48B | 315 | 0.09  |
| 1.008                         | ; qtot -0.09 |   |     |      |     |       |
| 316                           | HAL3         | 5 | MAL | H48C | 316 | 0.09  |
| 1.008                         | ; qtot 0     |   |     |      |     |       |
| ; residue 6 MAL rtp MAL q 0.0 |              |   |     |      |     |       |

|        |              |   |     |      |     |       |
|--------|--------------|---|-----|------|-----|-------|
| 317    | CT1          | 6 | MAL | C1   | 317 | -0.09 |
| 12.011 | ; qtot -0.09 |   |     |      |     |       |
| 318    | HB           | 6 | MAL | H1A  | 318 | 0.09  |
| 1.008  | ; qtot 0     |   |     |      |     |       |
| 319    | C            | 6 | MAL | C12  | 319 | 0.51  |
| 12.011 | ; qtot 0.51  |   |     |      |     |       |
| 320    | 0            | 6 | MAL | 012  | 320 | -0.51 |
| 15.999 | ; qtot 0     |   |     |      |     |       |
| 321    | NH1          | 6 | MAL | N1   | 321 | -0.47 |
| 14.007 | ; qtot -0.47 |   |     |      |     |       |
| 322    | H            | 6 | MAL | HN1  | 322 | 0.31  |
| 1.008  | ; qtot -0.16 |   |     |      |     |       |
| 323    | CT2          | 6 | MAL | C13  | 323 | -0.02 |
| 12.011 | ; qtot -0.18 |   |     |      |     |       |
| 324    | HB           | 6 | MAL | H13A | 324 | 0.09  |
| 1.008  | ; qtot -0.09 |   |     |      |     |       |
| 325    | HB           | 6 | MAL | H13B | 325 | 0.09  |
| 1.008  | ; qtot 0     |   |     |      |     |       |
| 326    | CTL2         | 6 | MAL | C14  | 326 | -0.18 |
| 12.011 | ; qtot -0.18 |   |     |      |     |       |
| 327    | HAL2         | 6 | MAL | H14A | 327 | 0.09  |
| 1.008  | ; qtot -0.09 |   |     |      |     |       |
| 328    | HAL2         | 6 | MAL | H14B | 328 | 0.09  |
| 1.008  | ; qtot 0     |   |     |      |     |       |
| 329    | CTL2         | 6 | MAL | C15  | 329 | -0.1  |
| 12.011 | ; qtot -0.1  |   |     |      |     |       |
| 330    | HAL2         | 6 | MAL | H15A | 330 | 0.25  |
| 1.008  | ; qtot 0.15  |   |     |      |     |       |
| 331    | HAL2         | 6 | MAL | H15B | 331 | 0.25  |
| 1.008  | ; qtot 0.4   |   |     |      |     |       |
| 332    | NTL          | 6 | MAL | N2   | 332 | -0.6  |
| 14.007 | ; qtot -0.2  |   |     |      |     |       |
| 333    | CTL5         | 6 | MAL | C16  | 333 | -0.35 |
| 12.011 | ; qtot -0.55 |   |     |      |     |       |
| 334    | HL           | 6 | MAL | H16A | 334 | 0.25  |
| 1.008  | ; qtot -0.3  |   |     |      |     |       |
| 335    | HL           | 6 | MAL | H16B | 335 | 0.25  |
| 1.008  | ; qtot -0.05 |   |     |      |     |       |
| 336    | HL           | 6 | MAL | H16C | 336 | 0.25  |
| 1.008  | ; qtot 0.2   |   |     |      |     |       |
| 337    | CTL5         | 6 | MAL | C17  | 337 | -0.35 |
| 12.011 | ; qtot -0.15 |   |     |      |     |       |
| 338    | HL           | 6 | MAL | H17A | 338 | 0.25  |
| 1.008  | ; qtot 0.1   |   |     |      |     |       |
| 339    | HL           | 6 | MAL | H17B | 339 | 0.25  |
| 1.008  | ; qtot 0.35  |   |     |      |     |       |
| 340    | HL           | 6 | MAL | H17C | 340 | 0.25  |
| 1.008  | ; qtot 0.6   |   |     |      |     |       |
| 341    | CTL5         | 6 | MAL | C18  | 341 | -0.35 |
| 12.011 | ; qtot 0.25  |   |     |      |     |       |
| 342    | HL           | 6 | MAL | H18A | 342 | 0.25  |
| 1.008  | ; qtot 0.5   |   |     |      |     |       |
| 343    | HL           | 6 | MAL | H18B | 343 | 0.25  |
| 1.008  | ; qtot 0.75  |   |     |      |     |       |

|        |              |   |     |      |     |       |
|--------|--------------|---|-----|------|-----|-------|
| 344    | HL           | 6 | MAL | H18C | 344 | 0.25  |
| 1.008  | ; qtot 1     |   |     |      |     |       |
| 345    | CT1          | 6 | MAL | C2   | 345 | -0.09 |
| 12.011 | ; qtot 0.91  |   |     |      |     |       |
| 346    | HB           | 6 | MAL | H2   | 346 | 0.09  |
| 1.008  | ; qtot 1     |   |     |      |     |       |
| 347    | CC           | 6 | MAL | C21  | 347 | 0.34  |
| 12.011 | ; qtot 1.34  |   |     |      |     |       |
| 348    | OC           | 6 | MAL | O21  | 348 | -0.67 |
| 15.999 | ; qtot 0.67  |   |     |      |     |       |
| 349    | OC           | 6 | MAL | O22  | 349 | -0.67 |
| 15.999 | ; qtot 0     |   |     |      |     |       |
| 350    | CTL2         | 6 | MAL | C3   | 350 | -0.18 |
| 12.011 | ; qtot -0.18 |   |     |      |     |       |
| 351    | HAL2         | 6 | MAL | H3A  | 351 | 0.09  |
| 1.008  | ; qtot -0.09 |   |     |      |     |       |
| 352    | HAL2         | 6 | MAL | H3B  | 352 | 0.09  |
| 1.008  | ; qtot 0     |   |     |      |     |       |
| 353    | CTL1         | 6 | MAL | C4   | 353 | -0.09 |
| 12.011 | ; qtot -0.09 |   |     |      |     |       |
| 354    | HAL1         | 6 | MAL | H4A  | 354 | 0.09  |
| 1.008  | ; qtot 0     |   |     |      |     |       |
| 355    | CTL2         | 6 | MAL | C41  | 355 | -0.18 |
| 12.011 | ; qtot -0.18 |   |     |      |     |       |
| 356    | HAL2         | 6 | MAL | H41A | 356 | 0.09  |
| 1.008  | ; qtot -0.09 |   |     |      |     |       |
| 357    | HAL2         | 6 | MAL | H41B | 357 | 0.09  |
| 1.008  | ; qtot 0     |   |     |      |     |       |
| 358    | CTL2         | 6 | MAL | C42  | 358 | -0.18 |
| 12.011 | ; qtot -0.18 |   |     |      |     |       |
| 359    | HAL2         | 6 | MAL | H42A | 359 | 0.09  |
| 1.008  | ; qtot -0.09 |   |     |      |     |       |
| 360    | HAL2         | 6 | MAL | H42B | 360 | 0.09  |
| 1.008  | ; qtot 0     |   |     |      |     |       |
| 361    | CTL2         | 6 | MAL | C43  | 361 | -0.18 |
| 12.011 | ; qtot -0.18 |   |     |      |     |       |
| 362    | HAL2         | 6 | MAL | H43A | 362 | 0.09  |
| 1.008  | ; qtot -0.09 |   |     |      |     |       |
| 363    | HAL2         | 6 | MAL | H43B | 363 | 0.09  |
| 1.008  | ; qtot 0     |   |     |      |     |       |
| 364    | CTL2         | 6 | MAL | C44  | 364 | -0.18 |
| 12.011 | ; qtot -0.18 |   |     |      |     |       |
| 365    | HAL2         | 6 | MAL | H44A | 365 | 0.09  |
| 1.008  | ; qtot -0.09 |   |     |      |     |       |
| 366    | HAL2         | 6 | MAL | H44B | 366 | 0.09  |
| 1.008  | ; qtot 0     |   |     |      |     |       |
| 367    | CTL2         | 6 | MAL | C45  | 367 | -0.18 |
| 12.011 | ; qtot -0.18 |   |     |      |     |       |
| 368    | HAL2         | 6 | MAL | H45A | 368 | 0.09  |
| 1.008  | ; qtot -0.09 |   |     |      |     |       |
| 369    | HAL2         | 6 | MAL | H45B | 369 | 0.09  |
| 1.008  | ; qtot 0     |   |     |      |     |       |
| 370    | CTL2         | 6 | MAL | C46  | 370 | -0.18 |
| 12.011 | ; qtot -0.18 |   |     |      |     |       |

|           |              |   |     |      |     |       |
|-----------|--------------|---|-----|------|-----|-------|
| 371       | HAL2         | 6 | MAL | H46A | 371 | 0.09  |
| 1.008     | ; qtot -0.09 |   |     |      |     |       |
| 372       | HAL2         | 6 | MAL | H46B | 372 | 0.09  |
| 1.008     | ; qtot 0     |   |     |      |     |       |
| 373       | CTL2         | 6 | MAL | C47  | 373 | -0.18 |
| 12.011    | ; qtot -0.18 |   |     |      |     |       |
| 374       | HAL2         | 6 | MAL | H47A | 374 | 0.09  |
| 1.008     | ; qtot -0.09 |   |     |      |     |       |
| 375       | HAL2         | 6 | MAL | H47B | 375 | 0.09  |
| 1.008     | ; qtot 0     |   |     |      |     |       |
| 376       | CTL3         | 6 | MAL | C48  | 376 | -0.27 |
| 12.011    | ; qtot -0.27 |   |     |      |     |       |
| 377       | HAL3         | 6 | MAL | H48A | 377 | 0.09  |
| 1.008     | ; qtot -0.18 |   |     |      |     |       |
| 378       | HAL3         | 6 | MAL | H48B | 378 | 0.09  |
| 1.008     | ; qtot -0.09 |   |     |      |     |       |
| 379       | HAL3         | 6 | MAL | H48C | 379 | 0.09  |
| 1.008     | ; qtot 0     |   |     |      |     |       |
| ; residue |              | 7 | MAL | rtp  | MAL | q 0.0 |
| 380       | CT1          | 7 | MAL | C1   | 380 | -0.09 |
| 12.011    | ; qtot -0.09 |   |     |      |     |       |
| 381       | HB           | 7 | MAL | H1A  | 381 | 0.09  |
| 1.008     | ; qtot 0     |   |     |      |     |       |
| 382       | C            | 7 | MAL | C12  | 382 | 0.51  |
| 12.011    | ; qtot 0.51  |   |     |      |     |       |
| 383       | 0            | 7 | MAL | 012  | 383 | -0.51 |
| 15.999    | ; qtot 0     |   |     |      |     |       |
| 384       | NH1          | 7 | MAL | N1   | 384 | -0.47 |
| 14.007    | ; qtot -0.47 |   |     |      |     |       |
| 385       | H            | 7 | MAL | HN1  | 385 | 0.31  |
| 1.008     | ; qtot -0.16 |   |     |      |     |       |
| 386       | CT2          | 7 | MAL | C13  | 386 | -0.02 |
| 12.011    | ; qtot -0.18 |   |     |      |     |       |
| 387       | HB           | 7 | MAL | H13A | 387 | 0.09  |
| 1.008     | ; qtot -0.09 |   |     |      |     |       |
| 388       | HB           | 7 | MAL | H13B | 388 | 0.09  |
| 1.008     | ; qtot 0     |   |     |      |     |       |
| 389       | CTL2         | 7 | MAL | C14  | 389 | -0.18 |
| 12.011    | ; qtot -0.18 |   |     |      |     |       |
| 390       | HAL2         | 7 | MAL | H14A | 390 | 0.09  |
| 1.008     | ; qtot -0.09 |   |     |      |     |       |
| 391       | HAL2         | 7 | MAL | H14B | 391 | 0.09  |
| 1.008     | ; qtot 0     |   |     |      |     |       |
| 392       | CTL2         | 7 | MAL | C15  | 392 | -0.1  |
| 12.011    | ; qtot -0.1  |   |     |      |     |       |
| 393       | HAL2         | 7 | MAL | H15A | 393 | 0.25  |
| 1.008     | ; qtot 0.15  |   |     |      |     |       |
| 394       | HAL2         | 7 | MAL | H15B | 394 | 0.25  |
| 1.008     | ; qtot 0.4   |   |     |      |     |       |
| 395       | NTL          | 7 | MAL | N2   | 395 | -0.6  |
| 14.007    | ; qtot -0.2  |   |     |      |     |       |
| 396       | CTL5         | 7 | MAL | C16  | 396 | -0.35 |
| 12.011    | ; qtot -0.55 |   |     |      |     |       |
| 397       | HL           | 7 | MAL | H16A | 397 | 0.25  |

|        |              |   |     |      |     |       |
|--------|--------------|---|-----|------|-----|-------|
| 1.008  | ; qtot -0.3  |   |     |      |     |       |
| 398    | HL           | 7 | MAL | H16B | 398 | 0.25  |
| 1.008  | ; qtot -0.05 |   |     |      |     |       |
| 399    | HL           | 7 | MAL | H16C | 399 | 0.25  |
| 1.008  | ; qtot 0.2   |   |     |      |     |       |
| 400    | CTL5         | 7 | MAL | C17  | 400 | -0.35 |
| 12.011 | ; qtot -0.15 |   |     |      |     |       |
| 401    | HL           | 7 | MAL | H17A | 401 | 0.25  |
| 1.008  | ; qtot 0.1   |   |     |      |     |       |
| 402    | HL           | 7 | MAL | H17B | 402 | 0.25  |
| 1.008  | ; qtot 0.35  |   |     |      |     |       |
| 403    | HL           | 7 | MAL | H17C | 403 | 0.25  |
| 1.008  | ; qtot 0.6   |   |     |      |     |       |
| 404    | CTL5         | 7 | MAL | C18  | 404 | -0.35 |
| 12.011 | ; qtot 0.25  |   |     |      |     |       |
| 405    | HL           | 7 | MAL | H18A | 405 | 0.25  |
| 1.008  | ; qtot 0.5   |   |     |      |     |       |
| 406    | HL           | 7 | MAL | H18B | 406 | 0.25  |
| 1.008  | ; qtot 0.75  |   |     |      |     |       |
| 407    | HL           | 7 | MAL | H18C | 407 | 0.25  |
| 1.008  | ; qtot 1     |   |     |      |     |       |
| 408    | CT1          | 7 | MAL | C2   | 408 | -0.09 |
| 12.011 | ; qtot 0.91  |   |     |      |     |       |
| 409    | HB           | 7 | MAL | H2   | 409 | 0.09  |
| 1.008  | ; qtot 1     |   |     |      |     |       |
| 410    | CC           | 7 | MAL | C21  | 410 | 0.34  |
| 12.011 | ; qtot 1.34  |   |     |      |     |       |
| 411    | OC           | 7 | MAL | O21  | 411 | -0.67 |
| 15.999 | ; qtot 0.67  |   |     |      |     |       |
| 412    | OC           | 7 | MAL | O22  | 412 | -0.67 |
| 15.999 | ; qtot 0     |   |     |      |     |       |
| 413    | CTL2         | 7 | MAL | C3   | 413 | -0.18 |
| 12.011 | ; qtot -0.18 |   |     |      |     |       |
| 414    | HAL2         | 7 | MAL | H3A  | 414 | 0.09  |
| 1.008  | ; qtot -0.09 |   |     |      |     |       |
| 415    | HAL2         | 7 | MAL | H3B  | 415 | 0.09  |
| 1.008  | ; qtot 0     |   |     |      |     |       |
| 416    | CTL1         | 7 | MAL | C4   | 416 | -0.09 |
| 12.011 | ; qtot -0.09 |   |     |      |     |       |
| 417    | HAL1         | 7 | MAL | H4A  | 417 | 0.09  |
| 1.008  | ; qtot 0     |   |     |      |     |       |
| 418    | CTL2         | 7 | MAL | C41  | 418 | -0.18 |
| 12.011 | ; qtot -0.18 |   |     |      |     |       |
| 419    | HAL2         | 7 | MAL | H41A | 419 | 0.09  |
| 1.008  | ; qtot -0.09 |   |     |      |     |       |
| 420    | HAL2         | 7 | MAL | H41B | 420 | 0.09  |
| 1.008  | ; qtot 0     |   |     |      |     |       |
| 421    | CTL2         | 7 | MAL | C42  | 421 | -0.18 |
| 12.011 | ; qtot -0.18 |   |     |      |     |       |
| 422    | HAL2         | 7 | MAL | H42A | 422 | 0.09  |
| 1.008  | ; qtot -0.09 |   |     |      |     |       |
| 423    | HAL2         | 7 | MAL | H42B | 423 | 0.09  |
| 1.008  | ; qtot 0     |   |     |      |     |       |
| 424    | CTL2         | 7 | MAL | C43  | 424 | -0.18 |



|                               |              |   |     |      |     |       |
|-------------------------------|--------------|---|-----|------|-----|-------|
| 12.011                        | ; qtot -0.18 |   |     |      |     |       |
| 425                           | HAL2         | 7 | MAL | H43A | 425 | 0.09  |
| 1.008                         | ; qtot -0.09 |   |     |      |     |       |
| 426                           | HAL2         | 7 | MAL | H43B | 426 | 0.09  |
| 1.008                         | ; qtot 0     |   |     |      |     |       |
| 427                           | CTL2         | 7 | MAL | C44  | 427 | -0.18 |
| 12.011                        | ; qtot -0.18 |   |     |      |     |       |
| 428                           | HAL2         | 7 | MAL | H44A | 428 | 0.09  |
| 1.008                         | ; qtot -0.09 |   |     |      |     |       |
| 429                           | HAL2         | 7 | MAL | H44B | 429 | 0.09  |
| 1.008                         | ; qtot 0     |   |     |      |     |       |
| 430                           | CTL2         | 7 | MAL | C45  | 430 | -0.18 |
| 12.011                        | ; qtot -0.18 |   |     |      |     |       |
| 431                           | HAL2         | 7 | MAL | H45A | 431 | 0.09  |
| 1.008                         | ; qtot -0.09 |   |     |      |     |       |
| 432                           | HAL2         | 7 | MAL | H45B | 432 | 0.09  |
| 1.008                         | ; qtot 0     |   |     |      |     |       |
| 433                           | CTL2         | 7 | MAL | C46  | 433 | -0.18 |
| 12.011                        | ; qtot -0.18 |   |     |      |     |       |
| 434                           | HAL2         | 7 | MAL | H46A | 434 | 0.09  |
| 1.008                         | ; qtot -0.09 |   |     |      |     |       |
| 435                           | HAL2         | 7 | MAL | H46B | 435 | 0.09  |
| 1.008                         | ; qtot 0     |   |     |      |     |       |
| 436                           | CTL2         | 7 | MAL | C47  | 436 | -0.18 |
| 12.011                        | ; qtot -0.18 |   |     |      |     |       |
| 437                           | HAL2         | 7 | MAL | H47A | 437 | 0.09  |
| 1.008                         | ; qtot -0.09 |   |     |      |     |       |
| 438                           | HAL2         | 7 | MAL | H47B | 438 | 0.09  |
| 1.008                         | ; qtot 0     |   |     |      |     |       |
| 439                           | CTL3         | 7 | MAL | C48  | 439 | -0.27 |
| 12.011                        | ; qtot -0.27 |   |     |      |     |       |
| 440                           | HAL3         | 7 | MAL | H48A | 440 | 0.09  |
| 1.008                         | ; qtot -0.18 |   |     |      |     |       |
| 441                           | HAL3         | 7 | MAL | H48B | 441 | 0.09  |
| 1.008                         | ; qtot -0.09 |   |     |      |     |       |
| 442                           | HAL3         | 7 | MAL | H48C | 442 | 0.09  |
| 1.008                         | ; qtot 0     |   |     |      |     |       |
| ; residue 8 MAL rtp MAL q 0.0 |              |   |     |      |     |       |
| 443                           | CT1          | 8 | MAL | C1   | 443 | -0.09 |
| 12.011                        | ; qtot -0.09 |   |     |      |     |       |
| 444                           | HB           | 8 | MAL | H1A  | 444 | 0.09  |
| 1.008                         | ; qtot 0     |   |     |      |     |       |
| 445                           | C            | 8 | MAL | C12  | 445 | 0.51  |
| 12.011                        | ; qtot 0.51  |   |     |      |     |       |
| 446                           | 0            | 8 | MAL | 012  | 446 | -0.51 |
| 15.999                        | ; qtot 0     |   |     |      |     |       |
| 447                           | NH1          | 8 | MAL | N1   | 447 | -0.47 |
| 14.007                        | ; qtot -0.47 |   |     |      |     |       |
| 448                           | H            | 8 | MAL | HN1  | 448 | 0.31  |
| 1.008                         | ; qtot -0.16 |   |     |      |     |       |
| 449                           | CT2          | 8 | MAL | C13  | 449 | -0.02 |
| 12.011                        | ; qtot -0.18 |   |     |      |     |       |
| 450                           | HB           | 8 | MAL | H13A | 450 | 0.09  |
| 1.008                         | ; qtot -0.09 |   |     |      |     |       |

|        |              |   |     |      |     |       |
|--------|--------------|---|-----|------|-----|-------|
| 451    | HB           | 8 | MAL | H13B | 451 | 0.09  |
| 1.008  | ; qtot 0     |   |     |      |     |       |
| 452    | CTL2         | 8 | MAL | C14  | 452 | -0.18 |
| 12.011 | ; qtot -0.18 |   |     |      |     |       |
| 453    | HAL2         | 8 | MAL | H14A | 453 | 0.09  |
| 1.008  | ; qtot -0.09 |   |     |      |     |       |
| 454    | HAL2         | 8 | MAL | H14B | 454 | 0.09  |
| 1.008  | ; qtot 0     |   |     |      |     |       |
| 455    | CTL2         | 8 | MAL | C15  | 455 | -0.1  |
| 12.011 | ; qtot -0.1  |   |     |      |     |       |
| 456    | HAL2         | 8 | MAL | H15A | 456 | 0.25  |
| 1.008  | ; qtot 0.15  |   |     |      |     |       |
| 457    | HAL2         | 8 | MAL | H15B | 457 | 0.25  |
| 1.008  | ; qtot 0.4   |   |     |      |     |       |
| 458    | NTL          | 8 | MAL | N2   | 458 | -0.6  |
| 14.007 | ; qtot -0.2  |   |     |      |     |       |
| 459    | CTL5         | 8 | MAL | C16  | 459 | -0.35 |
| 12.011 | ; qtot -0.55 |   |     |      |     |       |
| 460    | HL           | 8 | MAL | H16A | 460 | 0.25  |
| 1.008  | ; qtot -0.3  |   |     |      |     |       |
| 461    | HL           | 8 | MAL | H16B | 461 | 0.25  |
| 1.008  | ; qtot -0.05 |   |     |      |     |       |
| 462    | HL           | 8 | MAL | H16C | 462 | 0.25  |
| 1.008  | ; qtot 0.2   |   |     |      |     |       |
| 463    | CTL5         | 8 | MAL | C17  | 463 | -0.35 |
| 12.011 | ; qtot -0.15 |   |     |      |     |       |
| 464    | HL           | 8 | MAL | H17A | 464 | 0.25  |
| 1.008  | ; qtot 0.1   |   |     |      |     |       |
| 465    | HL           | 8 | MAL | H17B | 465 | 0.25  |
| 1.008  | ; qtot 0.35  |   |     |      |     |       |
| 466    | HL           | 8 | MAL | H17C | 466 | 0.25  |
| 1.008  | ; qtot 0.6   |   |     |      |     |       |
| 467    | CTL5         | 8 | MAL | C18  | 467 | -0.35 |
| 12.011 | ; qtot 0.25  |   |     |      |     |       |
| 468    | HL           | 8 | MAL | H18A | 468 | 0.25  |
| 1.008  | ; qtot 0.5   |   |     |      |     |       |
| 469    | HL           | 8 | MAL | H18B | 469 | 0.25  |
| 1.008  | ; qtot 0.75  |   |     |      |     |       |
| 470    | HL           | 8 | MAL | H18C | 470 | 0.25  |
| 1.008  | ; qtot 1     |   |     |      |     |       |
| 471    | CT1          | 8 | MAL | C2   | 471 | -0.09 |
| 12.011 | ; qtot 0.91  |   |     |      |     |       |
| 472    | HB           | 8 | MAL | H2   | 472 | 0.09  |
| 1.008  | ; qtot 1     |   |     |      |     |       |
| 473    | CC           | 8 | MAL | C21  | 473 | 0.34  |
| 12.011 | ; qtot 1.34  |   |     |      |     |       |
| 474    | OC           | 8 | MAL | O21  | 474 | -0.67 |
| 15.999 | ; qtot 0.67  |   |     |      |     |       |
| 475    | OC           | 8 | MAL | O22  | 475 | -0.67 |
| 15.999 | ; qtot 0     |   |     |      |     |       |
| 476    | CTL2         | 8 | MAL | C3   | 476 | -0.18 |
| 12.011 | ; qtot -0.18 |   |     |      |     |       |
| 477    | HAL2         | 8 | MAL | H3A  | 477 | 0.09  |
| 1.008  | ; qtot -0.09 |   |     |      |     |       |

|        |              |   |     |      |     |       |
|--------|--------------|---|-----|------|-----|-------|
| 478    | HAL2         | 8 | MAL | H3B  | 478 | 0.09  |
| 1.008  | ; qtot 0     |   |     |      |     |       |
| 479    | CTL1         | 8 | MAL | C4   | 479 | -0.09 |
| 12.011 | ; qtot -0.09 |   |     |      |     |       |
| 480    | HAL1         | 8 | MAL | H4A  | 480 | 0.09  |
| 1.008  | ; qtot 0     |   |     |      |     |       |
| 481    | CTL2         | 8 | MAL | C41  | 481 | -0.18 |
| 12.011 | ; qtot -0.18 |   |     |      |     |       |
| 482    | HAL2         | 8 | MAL | H41A | 482 | 0.09  |
| 1.008  | ; qtot -0.09 |   |     |      |     |       |
| 483    | HAL2         | 8 | MAL | H41B | 483 | 0.09  |
| 1.008  | ; qtot 0     |   |     |      |     |       |
| 484    | CTL2         | 8 | MAL | C42  | 484 | -0.18 |
| 12.011 | ; qtot -0.18 |   |     |      |     |       |
| 485    | HAL2         | 8 | MAL | H42A | 485 | 0.09  |
| 1.008  | ; qtot -0.09 |   |     |      |     |       |
| 486    | HAL2         | 8 | MAL | H42B | 486 | 0.09  |
| 1.008  | ; qtot 0     |   |     |      |     |       |
| 487    | CTL2         | 8 | MAL | C43  | 487 | -0.18 |
| 12.011 | ; qtot -0.18 |   |     |      |     |       |
| 488    | HAL2         | 8 | MAL | H43A | 488 | 0.09  |
| 1.008  | ; qtot -0.09 |   |     |      |     |       |
| 489    | HAL2         | 8 | MAL | H43B | 489 | 0.09  |
| 1.008  | ; qtot 0     |   |     |      |     |       |
| 490    | CTL2         | 8 | MAL | C44  | 490 | -0.18 |
| 12.011 | ; qtot -0.18 |   |     |      |     |       |
| 491    | HAL2         | 8 | MAL | H44A | 491 | 0.09  |
| 1.008  | ; qtot -0.09 |   |     |      |     |       |
| 492    | HAL2         | 8 | MAL | H44B | 492 | 0.09  |
| 1.008  | ; qtot 0     |   |     |      |     |       |
| 493    | CTL2         | 8 | MAL | C45  | 493 | -0.18 |
| 12.011 | ; qtot -0.18 |   |     |      |     |       |
| 494    | HAL2         | 8 | MAL | H45A | 494 | 0.09  |
| 1.008  | ; qtot -0.09 |   |     |      |     |       |
| 495    | HAL2         | 8 | MAL | H45B | 495 | 0.09  |
| 1.008  | ; qtot 0     |   |     |      |     |       |
| 496    | CTL2         | 8 | MAL | C46  | 496 | -0.18 |
| 12.011 | ; qtot -0.18 |   |     |      |     |       |
| 497    | HAL2         | 8 | MAL | H46A | 497 | 0.09  |
| 1.008  | ; qtot -0.09 |   |     |      |     |       |
| 498    | HAL2         | 8 | MAL | H46B | 498 | 0.09  |
| 1.008  | ; qtot 0     |   |     |      |     |       |
| 499    | CTL2         | 8 | MAL | C47  | 499 | -0.18 |
| 12.011 | ; qtot -0.18 |   |     |      |     |       |
| 500    | HAL2         | 8 | MAL | H47A | 500 | 0.09  |
| 1.008  | ; qtot -0.09 |   |     |      |     |       |
| 501    | HAL2         | 8 | MAL | H47B | 501 | 0.09  |
| 1.008  | ; qtot 0     |   |     |      |     |       |
| 502    | CTL3         | 8 | MAL | C48  | 502 | -0.27 |
| 12.011 | ; qtot -0.27 |   |     |      |     |       |
| 503    | HAL3         | 8 | MAL | H48A | 503 | 0.09  |
| 1.008  | ; qtot -0.18 |   |     |      |     |       |
| 504    | HAL3         | 8 | MAL | H48B | 504 | 0.09  |
| 1.008  | ; qtot -0.09 |   |     |      |     |       |

|                               |              |   |     |      |     |       |
|-------------------------------|--------------|---|-----|------|-----|-------|
| 505                           | HAL3         | 8 | MAL | H48C | 505 | 0.09  |
| 1.008                         | ; qtot 0     |   |     |      |     |       |
| ; residue 9 MAL rtp MAL q 0.0 |              |   |     |      |     |       |
| 506                           | CT1          | 9 | MAL | C1   | 506 | -0.09 |
| 12.011                        | ; qtot -0.09 |   |     |      |     |       |
| 507                           | HB           | 9 | MAL | H1A  | 507 | 0.09  |
| 1.008                         | ; qtot 0     |   |     |      |     |       |
| 508                           | C            | 9 | MAL | C12  | 508 | 0.51  |
| 12.011                        | ; qtot 0.51  |   |     |      |     |       |
| 509                           | 0            | 9 | MAL | 012  | 509 | -0.51 |
| 15.999                        | ; qtot 0     |   |     |      |     |       |
| 510                           | NH1          | 9 | MAL | N1   | 510 | -0.47 |
| 14.007                        | ; qtot -0.47 |   |     |      |     |       |
| 511                           | H            | 9 | MAL | HN1  | 511 | 0.31  |
| 1.008                         | ; qtot -0.16 |   |     |      |     |       |
| 512                           | CT2          | 9 | MAL | C13  | 512 | -0.02 |
| 12.011                        | ; qtot -0.18 |   |     |      |     |       |
| 513                           | HB           | 9 | MAL | H13A | 513 | 0.09  |
| 1.008                         | ; qtot -0.09 |   |     |      |     |       |
| 514                           | HB           | 9 | MAL | H13B | 514 | 0.09  |
| 1.008                         | ; qtot 0     |   |     |      |     |       |
| 515                           | CTL2         | 9 | MAL | C14  | 515 | -0.18 |
| 12.011                        | ; qtot -0.18 |   |     |      |     |       |
| 516                           | HAL2         | 9 | MAL | H14A | 516 | 0.09  |
| 1.008                         | ; qtot -0.09 |   |     |      |     |       |
| 517                           | HAL2         | 9 | MAL | H14B | 517 | 0.09  |
| 1.008                         | ; qtot 0     |   |     |      |     |       |
| 518                           | CTL2         | 9 | MAL | C15  | 518 | -0.1  |
| 12.011                        | ; qtot -0.1  |   |     |      |     |       |
| 519                           | HAL2         | 9 | MAL | H15A | 519 | 0.25  |
| 1.008                         | ; qtot 0.15  |   |     |      |     |       |
| 520                           | HAL2         | 9 | MAL | H15B | 520 | 0.25  |
| 1.008                         | ; qtot 0.4   |   |     |      |     |       |
| 521                           | NTL          | 9 | MAL | N2   | 521 | -0.6  |
| 14.007                        | ; qtot -0.2  |   |     |      |     |       |
| 522                           | CTL5         | 9 | MAL | C16  | 522 | -0.35 |
| 12.011                        | ; qtot -0.55 |   |     |      |     |       |
| 523                           | HL           | 9 | MAL | H16A | 523 | 0.25  |
| 1.008                         | ; qtot -0.3  |   |     |      |     |       |
| 524                           | HL           | 9 | MAL | H16B | 524 | 0.25  |
| 1.008                         | ; qtot -0.05 |   |     |      |     |       |
| 525                           | HL           | 9 | MAL | H16C | 525 | 0.25  |
| 1.008                         | ; qtot 0.2   |   |     |      |     |       |
| 526                           | CTL5         | 9 | MAL | C17  | 526 | -0.35 |
| 12.011                        | ; qtot -0.15 |   |     |      |     |       |
| 527                           | HL           | 9 | MAL | H17A | 527 | 0.25  |
| 1.008                         | ; qtot 0.1   |   |     |      |     |       |
| 528                           | HL           | 9 | MAL | H17B | 528 | 0.25  |
| 1.008                         | ; qtot 0.35  |   |     |      |     |       |
| 529                           | HL           | 9 | MAL | H17C | 529 | 0.25  |
| 1.008                         | ; qtot 0.6   |   |     |      |     |       |
| 530                           | CTL5         | 9 | MAL | C18  | 530 | -0.35 |
| 12.011                        | ; qtot 0.25  |   |     |      |     |       |
| 531                           | HL           | 9 | MAL | H18A | 531 | 0.25  |

|        |              |   |     |      |     |       |
|--------|--------------|---|-----|------|-----|-------|
| 1.008  | ; qtot 0.5   |   |     |      |     |       |
| 532    | HL           | 9 | MAL | H18B | 532 | 0.25  |
| 1.008  | ; qtot 0.75  |   |     |      |     |       |
| 533    | HL           | 9 | MAL | H18C | 533 | 0.25  |
| 1.008  | ; qtot 1     |   |     |      |     |       |
| 534    | CT1          | 9 | MAL | C2   | 534 | -0.09 |
| 12.011 | ; qtot 0.91  |   |     |      |     |       |
| 535    | HB           | 9 | MAL | H2   | 535 | 0.09  |
| 1.008  | ; qtot 1     |   |     |      |     |       |
| 536    | CC           | 9 | MAL | C21  | 536 | 0.34  |
| 12.011 | ; qtot 1.34  |   |     |      |     |       |
| 537    | OC           | 9 | MAL | 021  | 537 | -0.67 |
| 15.999 | ; qtot 0.67  |   |     |      |     |       |
| 538    | OC           | 9 | MAL | 022  | 538 | -0.67 |
| 15.999 | ; qtot 0     |   |     |      |     |       |
| 539    | CTL2         | 9 | MAL | C3   | 539 | -0.18 |
| 12.011 | ; qtot -0.18 |   |     |      |     |       |
| 540    | HAL2         | 9 | MAL | H3A  | 540 | 0.09  |
| 1.008  | ; qtot -0.09 |   |     |      |     |       |
| 541    | HAL2         | 9 | MAL | H3B  | 541 | 0.09  |
| 1.008  | ; qtot 0     |   |     |      |     |       |
| 542    | CTL1         | 9 | MAL | C4   | 542 | -0.09 |
| 12.011 | ; qtot -0.09 |   |     |      |     |       |
| 543    | HAL1         | 9 | MAL | H4A  | 543 | 0.09  |
| 1.008  | ; qtot 0     |   |     |      |     |       |
| 544    | CTL2         | 9 | MAL | C41  | 544 | -0.18 |
| 12.011 | ; qtot -0.18 |   |     |      |     |       |
| 545    | HAL2         | 9 | MAL | H41A | 545 | 0.09  |
| 1.008  | ; qtot -0.09 |   |     |      |     |       |
| 546    | HAL2         | 9 | MAL | H41B | 546 | 0.09  |
| 1.008  | ; qtot 0     |   |     |      |     |       |
| 547    | CTL2         | 9 | MAL | C42  | 547 | -0.18 |
| 12.011 | ; qtot -0.18 |   |     |      |     |       |
| 548    | HAL2         | 9 | MAL | H42A | 548 | 0.09  |
| 1.008  | ; qtot -0.09 |   |     |      |     |       |
| 549    | HAL2         | 9 | MAL | H42B | 549 | 0.09  |
| 1.008  | ; qtot 0     |   |     |      |     |       |
| 550    | CTL2         | 9 | MAL | C43  | 550 | -0.18 |
| 12.011 | ; qtot -0.18 |   |     |      |     |       |
| 551    | HAL2         | 9 | MAL | H43A | 551 | 0.09  |
| 1.008  | ; qtot -0.09 |   |     |      |     |       |
| 552    | HAL2         | 9 | MAL | H43B | 552 | 0.09  |
| 1.008  | ; qtot 0     |   |     |      |     |       |
| 553    | CTL2         | 9 | MAL | C44  | 553 | -0.18 |
| 12.011 | ; qtot -0.18 |   |     |      |     |       |
| 554    | HAL2         | 9 | MAL | H44A | 554 | 0.09  |
| 1.008  | ; qtot -0.09 |   |     |      |     |       |
| 555    | HAL2         | 9 | MAL | H44B | 555 | 0.09  |
| 1.008  | ; qtot 0     |   |     |      |     |       |
| 556    | CTL2         | 9 | MAL | C45  | 556 | -0.18 |
| 12.011 | ; qtot -0.18 |   |     |      |     |       |
| 557    | HAL2         | 9 | MAL | H45A | 557 | 0.09  |
| 1.008  | ; qtot -0.09 |   |     |      |     |       |
| 558    | HAL2         | 9 | MAL | H45B | 558 | 0.09  |

|        |                                |    |     |      |     |       |  |
|--------|--------------------------------|----|-----|------|-----|-------|--|
| 1.008  | ; qtot 0                       |    |     |      |     |       |  |
| 559    | CTL2                           | 9  | MAL | C46  | 559 | -0.18 |  |
| 12.011 | ; qtot -0.18                   |    |     |      |     |       |  |
| 560    | HAL2                           | 9  | MAL | H46A | 560 | 0.09  |  |
| 1.008  | ; qtot -0.09                   |    |     |      |     |       |  |
| 561    | HAL2                           | 9  | MAL | H46B | 561 | 0.09  |  |
| 1.008  | ; qtot 0                       |    |     |      |     |       |  |
| 562    | CTL2                           | 9  | MAL | C47  | 562 | -0.18 |  |
| 12.011 | ; qtot -0.18                   |    |     |      |     |       |  |
| 563    | HAL2                           | 9  | MAL | H47A | 563 | 0.09  |  |
| 1.008  | ; qtot -0.09                   |    |     |      |     |       |  |
| 564    | HAL2                           | 9  | MAL | H47B | 564 | 0.09  |  |
| 1.008  | ; qtot 0                       |    |     |      |     |       |  |
| 565    | CTL3                           | 9  | MAL | C48  | 565 | -0.27 |  |
| 12.011 | ; qtot -0.27                   |    |     |      |     |       |  |
| 566    | HAL3                           | 9  | MAL | H48A | 566 | 0.09  |  |
| 1.008  | ; qtot -0.18                   |    |     |      |     |       |  |
| 567    | HAL3                           | 9  | MAL | H48B | 567 | 0.09  |  |
| 1.008  | ; qtot -0.09                   |    |     |      |     |       |  |
| 568    | HAL3                           | 9  | MAL | H48C | 568 | 0.09  |  |
| 1.008  | ; qtot 0                       |    |     |      |     |       |  |
|        | ; residue 10 MAL rtp MAL q 0.0 |    |     |      |     |       |  |
| 569    | CT1                            | 10 | MAL | C1   | 569 | -0.09 |  |
| 12.011 | ; qtot -0.09                   |    |     |      |     |       |  |
| 570    | HB                             | 10 | MAL | H1A  | 570 | 0.09  |  |
| 1.008  | ; qtot 0                       |    |     |      |     |       |  |
| 571    | C                              | 10 | MAL | C12  | 571 | 0.51  |  |
| 12.011 | ; qtot 0.51                    |    |     |      |     |       |  |
| 572    | 0                              | 10 | MAL | 012  | 572 | -0.51 |  |
| 15.999 | ; qtot 0                       |    |     |      |     |       |  |
| 573    | NH1                            | 10 | MAL | N1   | 573 | -0.47 |  |
| 14.007 | ; qtot -0.47                   |    |     |      |     |       |  |
| 574    | H                              | 10 | MAL | HN1  | 574 | 0.31  |  |
| 1.008  | ; qtot -0.16                   |    |     |      |     |       |  |
| 575    | CT2                            | 10 | MAL | C13  | 575 | -0.02 |  |
| 12.011 | ; qtot -0.18                   |    |     |      |     |       |  |
| 576    | HB                             | 10 | MAL | H13A | 576 | 0.09  |  |
| 1.008  | ; qtot -0.09                   |    |     |      |     |       |  |
| 577    | HB                             | 10 | MAL | H13B | 577 | 0.09  |  |
| 1.008  | ; qtot 0                       |    |     |      |     |       |  |
| 578    | CTL2                           | 10 | MAL | C14  | 578 | -0.18 |  |
| 12.011 | ; qtot -0.18                   |    |     |      |     |       |  |
| 579    | HAL2                           | 10 | MAL | H14A | 579 | 0.09  |  |
| 1.008  | ; qtot -0.09                   |    |     |      |     |       |  |
| 580    | HAL2                           | 10 | MAL | H14B | 580 | 0.09  |  |
| 1.008  | ; qtot 0                       |    |     |      |     |       |  |
| 581    | CTL2                           | 10 | MAL | C15  | 581 | -0.1  |  |
| 12.011 | ; qtot -0.1                    |    |     |      |     |       |  |
| 582    | HAL2                           | 10 | MAL | H15A | 582 | 0.25  |  |
| 1.008  | ; qtot 0.15                    |    |     |      |     |       |  |
| 583    | HAL2                           | 10 | MAL | H15B | 583 | 0.25  |  |
| 1.008  | ; qtot 0.4                     |    |     |      |     |       |  |
| 584    | NTL                            | 10 | MAL | N2   | 584 | -0.6  |  |
| 14.007 | ; qtot -0.2                    |    |     |      |     |       |  |

|        |              |    |     |      |     |       |
|--------|--------------|----|-----|------|-----|-------|
| 585    | CTL5         | 10 | MAL | C16  | 585 | -0.35 |
| 12.011 | ; qtot -0.55 |    |     |      |     |       |
| 586    | HL           | 10 | MAL | H16A | 586 | 0.25  |
| 1.008  | ; qtot -0.3  |    |     |      |     |       |
| 587    | HL           | 10 | MAL | H16B | 587 | 0.25  |
| 1.008  | ; qtot -0.05 |    |     |      |     |       |
| 588    | HL           | 10 | MAL | H16C | 588 | 0.25  |
| 1.008  | ; qtot 0.2   |    |     |      |     |       |
| 589    | CTL5         | 10 | MAL | C17  | 589 | -0.35 |
| 12.011 | ; qtot -0.15 |    |     |      |     |       |
| 590    | HL           | 10 | MAL | H17A | 590 | 0.25  |
| 1.008  | ; qtot 0.1   |    |     |      |     |       |
| 591    | HL           | 10 | MAL | H17B | 591 | 0.25  |
| 1.008  | ; qtot 0.35  |    |     |      |     |       |
| 592    | HL           | 10 | MAL | H17C | 592 | 0.25  |
| 1.008  | ; qtot 0.6   |    |     |      |     |       |
| 593    | CTL5         | 10 | MAL | C18  | 593 | -0.35 |
| 12.011 | ; qtot 0.25  |    |     |      |     |       |
| 594    | HL           | 10 | MAL | H18A | 594 | 0.25  |
| 1.008  | ; qtot 0.5   |    |     |      |     |       |
| 595    | HL           | 10 | MAL | H18B | 595 | 0.25  |
| 1.008  | ; qtot 0.75  |    |     |      |     |       |
| 596    | HL           | 10 | MAL | H18C | 596 | 0.25  |
| 1.008  | ; qtot 1     |    |     |      |     |       |
| 597    | CT1          | 10 | MAL | C2   | 597 | -0.09 |
| 12.011 | ; qtot 0.91  |    |     |      |     |       |
| 598    | HB           | 10 | MAL | H2   | 598 | 0.09  |
| 1.008  | ; qtot 1     |    |     |      |     |       |
| 599    | CC           | 10 | MAL | C21  | 599 | 0.34  |
| 12.011 | ; qtot 1.34  |    |     |      |     |       |
| 600    | OC           | 10 | MAL | 021  | 600 | -0.67 |
| 15.999 | ; qtot 0.67  |    |     |      |     |       |
| 601    | OC           | 10 | MAL | 022  | 601 | -0.67 |
| 15.999 | ; qtot 0     |    |     |      |     |       |
| 602    | CTL2         | 10 | MAL | C3   | 602 | -0.18 |
| 12.011 | ; qtot -0.18 |    |     |      |     |       |
| 603    | HAL2         | 10 | MAL | H3A  | 603 | 0.09  |
| 1.008  | ; qtot -0.09 |    |     |      |     |       |
| 604    | HAL2         | 10 | MAL | H3B  | 604 | 0.09  |
| 1.008  | ; qtot 0     |    |     |      |     |       |
| 605    | CTL1         | 10 | MAL | C4   | 605 | -0.09 |
| 12.011 | ; qtot -0.09 |    |     |      |     |       |
| 606    | HAL1         | 10 | MAL | H4A  | 606 | 0.09  |
| 1.008  | ; qtot 0     |    |     |      |     |       |
| 607    | CTL2         | 10 | MAL | C41  | 607 | -0.18 |
| 12.011 | ; qtot -0.18 |    |     |      |     |       |
| 608    | HAL2         | 10 | MAL | H41A | 608 | 0.09  |
| 1.008  | ; qtot -0.09 |    |     |      |     |       |
| 609    | HAL2         | 10 | MAL | H41B | 609 | 0.09  |
| 1.008  | ; qtot 0     |    |     |      |     |       |
| 610    | CTL2         | 10 | MAL | C42  | 610 | -0.18 |
| 12.011 | ; qtot -0.18 |    |     |      |     |       |
| 611    | HAL2         | 10 | MAL | H42A | 611 | 0.09  |
| 1.008  | ; qtot -0.09 |    |     |      |     |       |

|                                |              |    |     |      |     |       |
|--------------------------------|--------------|----|-----|------|-----|-------|
| 612                            | HAL2         | 10 | MAL | H42B | 612 | 0.09  |
| 1.008                          | ; qtot 0     |    |     |      |     |       |
| 613                            | CTL2         | 10 | MAL | C43  | 613 | -0.18 |
| 12.011                         | ; qtot -0.18 |    |     |      |     |       |
| 614                            | HAL2         | 10 | MAL | H43A | 614 | 0.09  |
| 1.008                          | ; qtot -0.09 |    |     |      |     |       |
| 615                            | HAL2         | 10 | MAL | H43B | 615 | 0.09  |
| 1.008                          | ; qtot 0     |    |     |      |     |       |
| 616                            | CTL2         | 10 | MAL | C44  | 616 | -0.18 |
| 12.011                         | ; qtot -0.18 |    |     |      |     |       |
| 617                            | HAL2         | 10 | MAL | H44A | 617 | 0.09  |
| 1.008                          | ; qtot -0.09 |    |     |      |     |       |
| 618                            | HAL2         | 10 | MAL | H44B | 618 | 0.09  |
| 1.008                          | ; qtot 0     |    |     |      |     |       |
| 619                            | CTL2         | 10 | MAL | C45  | 619 | -0.18 |
| 12.011                         | ; qtot -0.18 |    |     |      |     |       |
| 620                            | HAL2         | 10 | MAL | H45A | 620 | 0.09  |
| 1.008                          | ; qtot -0.09 |    |     |      |     |       |
| 621                            | HAL2         | 10 | MAL | H45B | 621 | 0.09  |
| 1.008                          | ; qtot 0     |    |     |      |     |       |
| 622                            | CTL2         | 10 | MAL | C46  | 622 | -0.18 |
| 12.011                         | ; qtot -0.18 |    |     |      |     |       |
| 623                            | HAL2         | 10 | MAL | H46A | 623 | 0.09  |
| 1.008                          | ; qtot -0.09 |    |     |      |     |       |
| 624                            | HAL2         | 10 | MAL | H46B | 624 | 0.09  |
| 1.008                          | ; qtot 0     |    |     |      |     |       |
| 625                            | CTL2         | 10 | MAL | C47  | 625 | -0.18 |
| 12.011                         | ; qtot -0.18 |    |     |      |     |       |
| 626                            | HAL2         | 10 | MAL | H47A | 626 | 0.09  |
| 1.008                          | ; qtot -0.09 |    |     |      |     |       |
| 627                            | HAL2         | 10 | MAL | H47B | 627 | 0.09  |
| 1.008                          | ; qtot 0     |    |     |      |     |       |
| 628                            | CTL3         | 10 | MAL | C48  | 628 | -0.27 |
| 12.011                         | ; qtot -0.27 |    |     |      |     |       |
| 629                            | HAL3         | 10 | MAL | H48A | 629 | 0.09  |
| 1.008                          | ; qtot -0.18 |    |     |      |     |       |
| 630                            | HAL3         | 10 | MAL | H48B | 630 | 0.09  |
| 1.008                          | ; qtot -0.09 |    |     |      |     |       |
| 631                            | HAL3         | 10 | MAL | H48C | 631 | 0.09  |
| 1.008                          | ; qtot 0     |    |     |      |     |       |
| ; residue 11 MAL rtp MAL q 0.0 |              |    |     |      |     |       |
| 632                            | CT1          | 11 | MAL | C1   | 632 | -0.09 |
| 12.011                         | ; qtot -0.09 |    |     |      |     |       |
| 633                            | HB           | 11 | MAL | H1A  | 633 | 0.09  |
| 1.008                          | ; qtot 0     |    |     |      |     |       |
| 634                            | C            | 11 | MAL | C12  | 634 | 0.51  |
| 12.011                         | ; qtot 0.51  |    |     |      |     |       |
| 635                            | 0            | 11 | MAL | 012  | 635 | -0.51 |
| 15.999                         | ; qtot 0     |    |     |      |     |       |
| 636                            | NH1          | 11 | MAL | N1   | 636 | -0.47 |
| 14.007                         | ; qtot -0.47 |    |     |      |     |       |
| 637                            | H            | 11 | MAL | HN1  | 637 | 0.31  |
| 1.008                          | ; qtot -0.16 |    |     |      |     |       |
| 638                            | CT2          | 11 | MAL | C13  | 638 | -0.02 |



|        |              |    |     |      |     |       |  |
|--------|--------------|----|-----|------|-----|-------|--|
| 12.011 | ; qtot -0.18 |    |     |      |     |       |  |
| 639    | HB           | 11 | MAL | H13A | 639 | 0.09  |  |
| 1.008  | ; qtot -0.09 |    |     |      |     |       |  |
| 640    | HB           | 11 | MAL | H13B | 640 | 0.09  |  |
| 1.008  | ; qtot 0     |    |     |      |     |       |  |
| 641    | CTL2         | 11 | MAL | C14  | 641 | -0.18 |  |
| 12.011 | ; qtot -0.18 |    |     |      |     |       |  |
| 642    | HAL2         | 11 | MAL | H14A | 642 | 0.09  |  |
| 1.008  | ; qtot -0.09 |    |     |      |     |       |  |
| 643    | HAL2         | 11 | MAL | H14B | 643 | 0.09  |  |
| 1.008  | ; qtot 0     |    |     |      |     |       |  |
| 644    | CTL2         | 11 | MAL | C15  | 644 | -0.1  |  |
| 12.011 | ; qtot -0.1  |    |     |      |     |       |  |
| 645    | HAL2         | 11 | MAL | H15A | 645 | 0.25  |  |
| 1.008  | ; qtot 0.15  |    |     |      |     |       |  |
| 646    | HAL2         | 11 | MAL | H15B | 646 | 0.25  |  |
| 1.008  | ; qtot 0.4   |    |     |      |     |       |  |
| 647    | NTL          | 11 | MAL | N2   | 647 | -0.6  |  |
| 14.007 | ; qtot -0.2  |    |     |      |     |       |  |
| 648    | CTL5         | 11 | MAL | C16  | 648 | -0.35 |  |
| 12.011 | ; qtot -0.55 |    |     |      |     |       |  |
| 649    | HL           | 11 | MAL | H16A | 649 | 0.25  |  |
| 1.008  | ; qtot -0.3  |    |     |      |     |       |  |
| 650    | HL           | 11 | MAL | H16B | 650 | 0.25  |  |
| 1.008  | ; qtot -0.05 |    |     |      |     |       |  |
| 651    | HL           | 11 | MAL | H16C | 651 | 0.25  |  |
| 1.008  | ; qtot 0.2   |    |     |      |     |       |  |
| 652    | CTL5         | 11 | MAL | C17  | 652 | -0.35 |  |
| 12.011 | ; qtot -0.15 |    |     |      |     |       |  |
| 653    | HL           | 11 | MAL | H17A | 653 | 0.25  |  |
| 1.008  | ; qtot 0.1   |    |     |      |     |       |  |
| 654    | HL           | 11 | MAL | H17B | 654 | 0.25  |  |
| 1.008  | ; qtot 0.35  |    |     |      |     |       |  |
| 655    | HL           | 11 | MAL | H17C | 655 | 0.25  |  |
| 1.008  | ; qtot 0.6   |    |     |      |     |       |  |
| 656    | CTL5         | 11 | MAL | C18  | 656 | -0.35 |  |
| 12.011 | ; qtot 0.25  |    |     |      |     |       |  |
| 657    | HL           | 11 | MAL | H18A | 657 | 0.25  |  |
| 1.008  | ; qtot 0.5   |    |     |      |     |       |  |
| 658    | HL           | 11 | MAL | H18B | 658 | 0.25  |  |
| 1.008  | ; qtot 0.75  |    |     |      |     |       |  |
| 659    | HL           | 11 | MAL | H18C | 659 | 0.25  |  |
| 1.008  | ; qtot 1     |    |     |      |     |       |  |
| 660    | CT1          | 11 | MAL | C2   | 660 | -0.09 |  |
| 12.011 | ; qtot 0.91  |    |     |      |     |       |  |
| 661    | HB           | 11 | MAL | H2   | 661 | 0.09  |  |
| 1.008  | ; qtot 1     |    |     |      |     |       |  |
| 662    | CC           | 11 | MAL | C21  | 662 | 0.34  |  |
| 12.011 | ; qtot 1.34  |    |     |      |     |       |  |
| 663    | OC           | 11 | MAL | O21  | 663 | -0.67 |  |
| 15.999 | ; qtot 0.67  |    |     |      |     |       |  |
| 664    | OC           | 11 | MAL | O22  | 664 | -0.67 |  |
| 15.999 | ; qtot 0     |    |     |      |     |       |  |
| 665    | CTL2         | 11 | MAL | C3   | 665 | -0.18 |  |

|        |              |    |     |      |     |       |  |
|--------|--------------|----|-----|------|-----|-------|--|
| 12.011 | ; qtot -0.18 |    |     |      |     |       |  |
| 666    | HAL2         | 11 | MAL | H3A  | 666 | 0.09  |  |
| 1.008  | ; qtot -0.09 |    |     |      |     |       |  |
| 667    | HAL2         | 11 | MAL | H3B  | 667 | 0.09  |  |
| 1.008  | ; qtot 0     |    |     |      |     |       |  |
| 668    | CTL1         | 11 | MAL | C4   | 668 | -0.09 |  |
| 12.011 | ; qtot -0.09 |    |     |      |     |       |  |
| 669    | HAL1         | 11 | MAL | H4A  | 669 | 0.09  |  |
| 1.008  | ; qtot 0     |    |     |      |     |       |  |
| 670    | CTL2         | 11 | MAL | C41  | 670 | -0.18 |  |
| 12.011 | ; qtot -0.18 |    |     |      |     |       |  |
| 671    | HAL2         | 11 | MAL | H41A | 671 | 0.09  |  |
| 1.008  | ; qtot -0.09 |    |     |      |     |       |  |
| 672    | HAL2         | 11 | MAL | H41B | 672 | 0.09  |  |
| 1.008  | ; qtot 0     |    |     |      |     |       |  |
| 673    | CTL2         | 11 | MAL | C42  | 673 | -0.18 |  |
| 12.011 | ; qtot -0.18 |    |     |      |     |       |  |
| 674    | HAL2         | 11 | MAL | H42A | 674 | 0.09  |  |
| 1.008  | ; qtot -0.09 |    |     |      |     |       |  |
| 675    | HAL2         | 11 | MAL | H42B | 675 | 0.09  |  |
| 1.008  | ; qtot 0     |    |     |      |     |       |  |
| 676    | CTL2         | 11 | MAL | C43  | 676 | -0.18 |  |
| 12.011 | ; qtot -0.18 |    |     |      |     |       |  |
| 677    | HAL2         | 11 | MAL | H43A | 677 | 0.09  |  |
| 1.008  | ; qtot -0.09 |    |     |      |     |       |  |
| 678    | HAL2         | 11 | MAL | H43B | 678 | 0.09  |  |
| 1.008  | ; qtot 0     |    |     |      |     |       |  |
| 679    | CTL2         | 11 | MAL | C44  | 679 | -0.18 |  |
| 12.011 | ; qtot -0.18 |    |     |      |     |       |  |
| 680    | HAL2         | 11 | MAL | H44A | 680 | 0.09  |  |
| 1.008  | ; qtot -0.09 |    |     |      |     |       |  |
| 681    | HAL2         | 11 | MAL | H44B | 681 | 0.09  |  |
| 1.008  | ; qtot 0     |    |     |      |     |       |  |
| 682    | CTL2         | 11 | MAL | C45  | 682 | -0.18 |  |
| 12.011 | ; qtot -0.18 |    |     |      |     |       |  |
| 683    | HAL2         | 11 | MAL | H45A | 683 | 0.09  |  |
| 1.008  | ; qtot -0.09 |    |     |      |     |       |  |
| 684    | HAL2         | 11 | MAL | H45B | 684 | 0.09  |  |
| 1.008  | ; qtot 0     |    |     |      |     |       |  |
| 685    | CTL2         | 11 | MAL | C46  | 685 | -0.18 |  |
| 12.011 | ; qtot -0.18 |    |     |      |     |       |  |
| 686    | HAL2         | 11 | MAL | H46A | 686 | 0.09  |  |
| 1.008  | ; qtot -0.09 |    |     |      |     |       |  |
| 687    | HAL2         | 11 | MAL | H46B | 687 | 0.09  |  |
| 1.008  | ; qtot 0     |    |     |      |     |       |  |
| 688    | CTL2         | 11 | MAL | C47  | 688 | -0.18 |  |
| 12.011 | ; qtot -0.18 |    |     |      |     |       |  |
| 689    | HAL2         | 11 | MAL | H47A | 689 | 0.09  |  |
| 1.008  | ; qtot -0.09 |    |     |      |     |       |  |
| 690    | HAL2         | 11 | MAL | H47B | 690 | 0.09  |  |
| 1.008  | ; qtot 0     |    |     |      |     |       |  |
| 691    | CTL3         | 11 | MAL | C48  | 691 | -0.27 |  |
| 12.011 | ; qtot -0.27 |    |     |      |     |       |  |
| 692    | HAL3         | 11 | MAL | H48A | 692 | 0.09  |  |

|                                |              |    |     |      |     |       |  |
|--------------------------------|--------------|----|-----|------|-----|-------|--|
| 1.008                          | ; qtot -0.18 |    |     |      |     |       |  |
| 693                            | HAL3         | 11 | MAL | H48B | 693 | 0.09  |  |
| 1.008                          | ; qtot -0.09 |    |     |      |     |       |  |
| 694                            | HAL3         | 11 | MAL | H48C | 694 | 0.09  |  |
| 1.008                          | ; qtot 0     |    |     |      |     |       |  |
| ; residue 12 MAL rtp MAL q 0.0 |              |    |     |      |     |       |  |
| 695                            | CT1          | 12 | MAL | C1   | 695 | -0.09 |  |
| 12.011                         | ; qtot -0.09 |    |     |      |     |       |  |
| 696                            | HB           | 12 | MAL | H1A  | 696 | 0.09  |  |
| 1.008                          | ; qtot 0     |    |     |      |     |       |  |
| 697                            | C            | 12 | MAL | C12  | 697 | 0.51  |  |
| 12.011                         | ; qtot 0.51  |    |     |      |     |       |  |
| 698                            | 0            | 12 | MAL | 012  | 698 | -0.51 |  |
| 15.999                         | ; qtot 0     |    |     |      |     |       |  |
| 699                            | NH1          | 12 | MAL | N1   | 699 | -0.47 |  |
| 14.007                         | ; qtot -0.47 |    |     |      |     |       |  |
| 700                            | H            | 12 | MAL | HN1  | 700 | 0.31  |  |
| 1.008                          | ; qtot -0.16 |    |     |      |     |       |  |
| 701                            | CT2          | 12 | MAL | C13  | 701 | -0.02 |  |
| 12.011                         | ; qtot -0.18 |    |     |      |     |       |  |
| 702                            | HB           | 12 | MAL | H13A | 702 | 0.09  |  |
| 1.008                          | ; qtot -0.09 |    |     |      |     |       |  |
| 703                            | HB           | 12 | MAL | H13B | 703 | 0.09  |  |
| 1.008                          | ; qtot 0     |    |     |      |     |       |  |
| 704                            | CTL2         | 12 | MAL | C14  | 704 | -0.18 |  |
| 12.011                         | ; qtot -0.18 |    |     |      |     |       |  |
| 705                            | HAL2         | 12 | MAL | H14A | 705 | 0.09  |  |
| 1.008                          | ; qtot -0.09 |    |     |      |     |       |  |
| 706                            | HAL2         | 12 | MAL | H14B | 706 | 0.09  |  |
| 1.008                          | ; qtot 0     |    |     |      |     |       |  |
| 707                            | CTL2         | 12 | MAL | C15  | 707 | -0.1  |  |
| 12.011                         | ; qtot -0.1  |    |     |      |     |       |  |
| 708                            | HAL2         | 12 | MAL | H15A | 708 | 0.25  |  |
| 1.008                          | ; qtot 0.15  |    |     |      |     |       |  |
| 709                            | HAL2         | 12 | MAL | H15B | 709 | 0.25  |  |
| 1.008                          | ; qtot 0.4   |    |     |      |     |       |  |
| 710                            | NTL          | 12 | MAL | N2   | 710 | -0.6  |  |
| 14.007                         | ; qtot -0.2  |    |     |      |     |       |  |
| 711                            | CTL5         | 12 | MAL | C16  | 711 | -0.35 |  |
| 12.011                         | ; qtot -0.55 |    |     |      |     |       |  |
| 712                            | HL           | 12 | MAL | H16A | 712 | 0.25  |  |
| 1.008                          | ; qtot -0.3  |    |     |      |     |       |  |
| 713                            | HL           | 12 | MAL | H16B | 713 | 0.25  |  |
| 1.008                          | ; qtot -0.05 |    |     |      |     |       |  |
| 714                            | HL           | 12 | MAL | H16C | 714 | 0.25  |  |
| 1.008                          | ; qtot 0.2   |    |     |      |     |       |  |
| 715                            | CTL5         | 12 | MAL | C17  | 715 | -0.35 |  |
| 12.011                         | ; qtot -0.15 |    |     |      |     |       |  |
| 716                            | HL           | 12 | MAL | H17A | 716 | 0.25  |  |
| 1.008                          | ; qtot 0.1   |    |     |      |     |       |  |
| 717                            | HL           | 12 | MAL | H17B | 717 | 0.25  |  |
| 1.008                          | ; qtot 0.35  |    |     |      |     |       |  |
| 718                            | HL           | 12 | MAL | H17C | 718 | 0.25  |  |
| 1.008                          | ; qtot 0.6   |    |     |      |     |       |  |

|        |              |    |     |      |     |       |
|--------|--------------|----|-----|------|-----|-------|
| 719    | CTL5         | 12 | MAL | C18  | 719 | -0.35 |
| 12.011 | ; qtot 0.25  |    |     |      |     |       |
| 720    | HL           | 12 | MAL | H18A | 720 | 0.25  |
| 1.008  | ; qtot 0.5   |    |     |      |     |       |
| 721    | HL           | 12 | MAL | H18B | 721 | 0.25  |
| 1.008  | ; qtot 0.75  |    |     |      |     |       |
| 722    | HL           | 12 | MAL | H18C | 722 | 0.25  |
| 1.008  | ; qtot 1     |    |     |      |     |       |
| 723    | CT1          | 12 | MAL | C2   | 723 | -0.09 |
| 12.011 | ; qtot 0.91  |    |     |      |     |       |
| 724    | HB           | 12 | MAL | H2   | 724 | 0.09  |
| 1.008  | ; qtot 1     |    |     |      |     |       |
| 725    | CC           | 12 | MAL | C21  | 725 | 0.34  |
| 12.011 | ; qtot 1.34  |    |     |      |     |       |
| 726    | OC           | 12 | MAL | 021  | 726 | -0.67 |
| 15.999 | ; qtot 0.67  |    |     |      |     |       |
| 727    | OC           | 12 | MAL | 022  | 727 | -0.67 |
| 15.999 | ; qtot 0     |    |     |      |     |       |
| 728    | CTL2         | 12 | MAL | C3   | 728 | -0.18 |
| 12.011 | ; qtot -0.18 |    |     |      |     |       |
| 729    | HAL2         | 12 | MAL | H3A  | 729 | 0.09  |
| 1.008  | ; qtot -0.09 |    |     |      |     |       |
| 730    | HAL2         | 12 | MAL | H3B  | 730 | 0.09  |
| 1.008  | ; qtot 0     |    |     |      |     |       |
| 731    | CTL1         | 12 | MAL | C4   | 731 | -0.09 |
| 12.011 | ; qtot -0.09 |    |     |      |     |       |
| 732    | HAL1         | 12 | MAL | H4A  | 732 | 0.09  |
| 1.008  | ; qtot 0     |    |     |      |     |       |
| 733    | CTL2         | 12 | MAL | C41  | 733 | -0.18 |
| 12.011 | ; qtot -0.18 |    |     |      |     |       |
| 734    | HAL2         | 12 | MAL | H41A | 734 | 0.09  |
| 1.008  | ; qtot -0.09 |    |     |      |     |       |
| 735    | HAL2         | 12 | MAL | H41B | 735 | 0.09  |
| 1.008  | ; qtot 0     |    |     |      |     |       |
| 736    | CTL2         | 12 | MAL | C42  | 736 | -0.18 |
| 12.011 | ; qtot -0.18 |    |     |      |     |       |
| 737    | HAL2         | 12 | MAL | H42A | 737 | 0.09  |
| 1.008  | ; qtot -0.09 |    |     |      |     |       |
| 738    | HAL2         | 12 | MAL | H42B | 738 | 0.09  |
| 1.008  | ; qtot 0     |    |     |      |     |       |
| 739    | CTL2         | 12 | MAL | C43  | 739 | -0.18 |
| 12.011 | ; qtot -0.18 |    |     |      |     |       |
| 740    | HAL2         | 12 | MAL | H43A | 740 | 0.09  |
| 1.008  | ; qtot -0.09 |    |     |      |     |       |
| 741    | HAL2         | 12 | MAL | H43B | 741 | 0.09  |
| 1.008  | ; qtot 0     |    |     |      |     |       |
| 742    | CTL2         | 12 | MAL | C44  | 742 | -0.18 |
| 12.011 | ; qtot -0.18 |    |     |      |     |       |
| 743    | HAL2         | 12 | MAL | H44A | 743 | 0.09  |
| 1.008  | ; qtot -0.09 |    |     |      |     |       |
| 744    | HAL2         | 12 | MAL | H44B | 744 | 0.09  |
| 1.008  | ; qtot 0     |    |     |      |     |       |
| 745    | CTL2         | 12 | MAL | C45  | 745 | -0.18 |
| 12.011 | ; qtot -0.18 |    |     |      |     |       |

|                                |              |    |     |      |     |       |
|--------------------------------|--------------|----|-----|------|-----|-------|
| 746                            | HAL2         | 12 | MAL | H45A | 746 | 0.09  |
| 1.008                          | ; qtot -0.09 |    |     |      |     |       |
| 747                            | HAL2         | 12 | MAL | H45B | 747 | 0.09  |
| 1.008                          | ; qtot 0     |    |     |      |     |       |
| 748                            | CTL2         | 12 | MAL | C46  | 748 | -0.18 |
| 12.011                         | ; qtot -0.18 |    |     |      |     |       |
| 749                            | HAL2         | 12 | MAL | H46A | 749 | 0.09  |
| 1.008                          | ; qtot -0.09 |    |     |      |     |       |
| 750                            | HAL2         | 12 | MAL | H46B | 750 | 0.09  |
| 1.008                          | ; qtot 0     |    |     |      |     |       |
| 751                            | CTL2         | 12 | MAL | C47  | 751 | -0.18 |
| 12.011                         | ; qtot -0.18 |    |     |      |     |       |
| 752                            | HAL2         | 12 | MAL | H47A | 752 | 0.09  |
| 1.008                          | ; qtot -0.09 |    |     |      |     |       |
| 753                            | HAL2         | 12 | MAL | H47B | 753 | 0.09  |
| 1.008                          | ; qtot 0     |    |     |      |     |       |
| 754                            | CTL3         | 12 | MAL | C48  | 754 | -0.27 |
| 12.011                         | ; qtot -0.27 |    |     |      |     |       |
| 755                            | HAL3         | 12 | MAL | H48A | 755 | 0.09  |
| 1.008                          | ; qtot -0.18 |    |     |      |     |       |
| 756                            | HAL3         | 12 | MAL | H48B | 756 | 0.09  |
| 1.008                          | ; qtot -0.09 |    |     |      |     |       |
| 757                            | HAL3         | 12 | MAL | H48C | 757 | 0.09  |
| 1.008                          | ; qtot 0     |    |     |      |     |       |
| ; residue 13 MAL rtp MAL q 0.0 |              |    |     |      |     |       |
| 758                            | CT1          | 13 | MAL | C1   | 758 | -0.09 |
| 12.011                         | ; qtot -0.09 |    |     |      |     |       |
| 759                            | HB           | 13 | MAL | H1A  | 759 | 0.09  |
| 1.008                          | ; qtot 0     |    |     |      |     |       |
| 760                            | C            | 13 | MAL | C12  | 760 | 0.51  |
| 12.011                         | ; qtot 0.51  |    |     |      |     |       |
| 761                            | 0            | 13 | MAL | 012  | 761 | -0.51 |
| 15.999                         | ; qtot 0     |    |     |      |     |       |
| 762                            | NH1          | 13 | MAL | N1   | 762 | -0.47 |
| 14.007                         | ; qtot -0.47 |    |     |      |     |       |
| 763                            | H            | 13 | MAL | HN1  | 763 | 0.31  |
| 1.008                          | ; qtot -0.16 |    |     |      |     |       |
| 764                            | CT2          | 13 | MAL | C13  | 764 | -0.02 |
| 12.011                         | ; qtot -0.18 |    |     |      |     |       |
| 765                            | HB           | 13 | MAL | H13A | 765 | 0.09  |
| 1.008                          | ; qtot -0.09 |    |     |      |     |       |
| 766                            | HB           | 13 | MAL | H13B | 766 | 0.09  |
| 1.008                          | ; qtot 0     |    |     |      |     |       |
| 767                            | CTL2         | 13 | MAL | C14  | 767 | -0.18 |
| 12.011                         | ; qtot -0.18 |    |     |      |     |       |
| 768                            | HAL2         | 13 | MAL | H14A | 768 | 0.09  |
| 1.008                          | ; qtot -0.09 |    |     |      |     |       |
| 769                            | HAL2         | 13 | MAL | H14B | 769 | 0.09  |
| 1.008                          | ; qtot 0     |    |     |      |     |       |
| 770                            | CTL2         | 13 | MAL | C15  | 770 | -0.1  |
| 12.011                         | ; qtot -0.1  |    |     |      |     |       |
| 771                            | HAL2         | 13 | MAL | H15A | 771 | 0.25  |
| 1.008                          | ; qtot 0.15  |    |     |      |     |       |
| 772                            | HAL2         | 13 | MAL | H15B | 772 | 0.25  |

|        |              |    |     |      |     |       |  |
|--------|--------------|----|-----|------|-----|-------|--|
| 1.008  | ; qtot 0.4   |    |     |      |     |       |  |
| 773    | NTL          | 13 | MAL | N2   | 773 | -0.6  |  |
| 14.007 | ; qtot -0.2  |    |     |      |     |       |  |
| 774    | CTL5         | 13 | MAL | C16  | 774 | -0.35 |  |
| 12.011 | ; qtot -0.55 |    |     |      |     |       |  |
| 775    | HL           | 13 | MAL | H16A | 775 | 0.25  |  |
| 1.008  | ; qtot -0.3  |    |     |      |     |       |  |
| 776    | HL           | 13 | MAL | H16B | 776 | 0.25  |  |
| 1.008  | ; qtot -0.05 |    |     |      |     |       |  |
| 777    | HL           | 13 | MAL | H16C | 777 | 0.25  |  |
| 1.008  | ; qtot 0.2   |    |     |      |     |       |  |
| 778    | CTL5         | 13 | MAL | C17  | 778 | -0.35 |  |
| 12.011 | ; qtot -0.15 |    |     |      |     |       |  |
| 779    | HL           | 13 | MAL | H17A | 779 | 0.25  |  |
| 1.008  | ; qtot 0.1   |    |     |      |     |       |  |
| 780    | HL           | 13 | MAL | H17B | 780 | 0.25  |  |
| 1.008  | ; qtot 0.35  |    |     |      |     |       |  |
| 781    | HL           | 13 | MAL | H17C | 781 | 0.25  |  |
| 1.008  | ; qtot 0.6   |    |     |      |     |       |  |
| 782    | CTL5         | 13 | MAL | C18  | 782 | -0.35 |  |
| 12.011 | ; qtot 0.25  |    |     |      |     |       |  |
| 783    | HL           | 13 | MAL | H18A | 783 | 0.25  |  |
| 1.008  | ; qtot 0.5   |    |     |      |     |       |  |
| 784    | HL           | 13 | MAL | H18B | 784 | 0.25  |  |
| 1.008  | ; qtot 0.75  |    |     |      |     |       |  |
| 785    | HL           | 13 | MAL | H18C | 785 | 0.25  |  |
| 1.008  | ; qtot 1     |    |     |      |     |       |  |
| 786    | CT1          | 13 | MAL | C2   | 786 | -0.09 |  |
| 12.011 | ; qtot 0.91  |    |     |      |     |       |  |
| 787    | HB           | 13 | MAL | H2   | 787 | 0.09  |  |
| 1.008  | ; qtot 1     |    |     |      |     |       |  |
| 788    | CC           | 13 | MAL | C21  | 788 | 0.34  |  |
| 12.011 | ; qtot 1.34  |    |     |      |     |       |  |
| 789    | OC           | 13 | MAL | O21  | 789 | -0.67 |  |
| 15.999 | ; qtot 0.67  |    |     |      |     |       |  |
| 790    | OC           | 13 | MAL | O22  | 790 | -0.67 |  |
| 15.999 | ; qtot 0     |    |     |      |     |       |  |
| 791    | CTL2         | 13 | MAL | C3   | 791 | -0.18 |  |
| 12.011 | ; qtot -0.18 |    |     |      |     |       |  |
| 792    | HAL2         | 13 | MAL | H3A  | 792 | 0.09  |  |
| 1.008  | ; qtot -0.09 |    |     |      |     |       |  |
| 793    | HAL2         | 13 | MAL | H3B  | 793 | 0.09  |  |
| 1.008  | ; qtot 0     |    |     |      |     |       |  |
| 794    | CTL1         | 13 | MAL | C4   | 794 | -0.09 |  |
| 12.011 | ; qtot -0.09 |    |     |      |     |       |  |
| 795    | HAL1         | 13 | MAL | H4A  | 795 | 0.09  |  |
| 1.008  | ; qtot 0     |    |     |      |     |       |  |
| 796    | CTL2         | 13 | MAL | C41  | 796 | -0.18 |  |
| 12.011 | ; qtot -0.18 |    |     |      |     |       |  |
| 797    | HAL2         | 13 | MAL | H41A | 797 | 0.09  |  |
| 1.008  | ; qtot -0.09 |    |     |      |     |       |  |
| 798    | HAL2         | 13 | MAL | H41B | 798 | 0.09  |  |
| 1.008  | ; qtot 0     |    |     |      |     |       |  |
| 799    | CTL2         | 13 | MAL | C42  | 799 | -0.18 |  |

|           |              |     |     |      |     |       |  |
|-----------|--------------|-----|-----|------|-----|-------|--|
| 12.011    | ; qtot -0.18 |     |     |      |     |       |  |
| 800       | HAL2         | 13  | MAL | H42A | 800 | 0.09  |  |
| 1.008     | ; qtot -0.09 |     |     |      |     |       |  |
| 801       | HAL2         | 13  | MAL | H42B | 801 | 0.09  |  |
| 1.008     | ; qtot 0     |     |     |      |     |       |  |
| 802       | CTL2         | 13  | MAL | C43  | 802 | -0.18 |  |
| 12.011    | ; qtot -0.18 |     |     |      |     |       |  |
| 803       | HAL2         | 13  | MAL | H43A | 803 | 0.09  |  |
| 1.008     | ; qtot -0.09 |     |     |      |     |       |  |
| 804       | HAL2         | 13  | MAL | H43B | 804 | 0.09  |  |
| 1.008     | ; qtot 0     |     |     |      |     |       |  |
| 805       | CTL2         | 13  | MAL | C44  | 805 | -0.18 |  |
| 12.011    | ; qtot -0.18 |     |     |      |     |       |  |
| 806       | HAL2         | 13  | MAL | H44A | 806 | 0.09  |  |
| 1.008     | ; qtot -0.09 |     |     |      |     |       |  |
| 807       | HAL2         | 13  | MAL | H44B | 807 | 0.09  |  |
| 1.008     | ; qtot 0     |     |     |      |     |       |  |
| 808       | CTL2         | 13  | MAL | C45  | 808 | -0.18 |  |
| 12.011    | ; qtot -0.18 |     |     |      |     |       |  |
| 809       | HAL2         | 13  | MAL | H45A | 809 | 0.09  |  |
| 1.008     | ; qtot -0.09 |     |     |      |     |       |  |
| 810       | HAL2         | 13  | MAL | H45B | 810 | 0.09  |  |
| 1.008     | ; qtot 0     |     |     |      |     |       |  |
| 811       | CTL2         | 13  | MAL | C46  | 811 | -0.18 |  |
| 12.011    | ; qtot -0.18 |     |     |      |     |       |  |
| 812       | HAL2         | 13  | MAL | H46A | 812 | 0.09  |  |
| 1.008     | ; qtot -0.09 |     |     |      |     |       |  |
| 813       | HAL2         | 13  | MAL | H46B | 813 | 0.09  |  |
| 1.008     | ; qtot 0     |     |     |      |     |       |  |
| 814       | CTL2         | 13  | MAL | C47  | 814 | -0.18 |  |
| 12.011    | ; qtot -0.18 |     |     |      |     |       |  |
| 815       | HAL2         | 13  | MAL | H47A | 815 | 0.09  |  |
| 1.008     | ; qtot -0.09 |     |     |      |     |       |  |
| 816       | HAL2         | 13  | MAL | H47B | 816 | 0.09  |  |
| 1.008     | ; qtot 0     |     |     |      |     |       |  |
| 817       | CTL3         | 13  | MAL | C48  | 817 | -0.27 |  |
| 12.011    | ; qtot -0.27 |     |     |      |     |       |  |
| 818       | HAL3         | 13  | MAL | H48A | 818 | 0.09  |  |
| 1.008     | ; qtot -0.18 |     |     |      |     |       |  |
| 819       | HAL3         | 13  | MAL | H48B | 819 | 0.09  |  |
| 1.008     | ; qtot -0.09 |     |     |      |     |       |  |
| 820       | HAL3         | 13  | MAL | H48C | 820 | 0.09  |  |
| 1.008     | ; qtot 0     |     |     |      |     |       |  |
| ; residue | 14 MAL rtp   | MAL | q   | 0.0  |     |       |  |
| 821       | CT1          | 14  | MAL | C1   | 821 | -0.09 |  |
| 12.011    | ; qtot -0.09 |     |     |      |     |       |  |
| 822       | HB           | 14  | MAL | H1A  | 822 | 0.09  |  |
| 1.008     | ; qtot 0     |     |     |      |     |       |  |
| 823       | C            | 14  | MAL | C12  | 823 | 0.51  |  |
| 12.011    | ; qtot 0.51  |     |     |      |     |       |  |
| 824       | 0            | 14  | MAL | 012  | 824 | -0.51 |  |
| 15.999    | ; qtot 0     |     |     |      |     |       |  |
| 825       | NH1          | 14  | MAL | N1   | 825 | -0.47 |  |
| 14.007    | ; qtot -0.47 |     |     |      |     |       |  |

|        |              |    |     |      |     |       |
|--------|--------------|----|-----|------|-----|-------|
| 826    | H            | 14 | MAL | HN1  | 826 | 0.31  |
| 1.008  | ; qtot -0.16 |    |     |      |     |       |
| 827    | CT2          | 14 | MAL | C13  | 827 | -0.02 |
| 12.011 | ; qtot -0.18 |    |     |      |     |       |
| 828    | HB           | 14 | MAL | H13A | 828 | 0.09  |
| 1.008  | ; qtot -0.09 |    |     |      |     |       |
| 829    | HB           | 14 | MAL | H13B | 829 | 0.09  |
| 1.008  | ; qtot 0     |    |     |      |     |       |
| 830    | CTL2         | 14 | MAL | C14  | 830 | -0.18 |
| 12.011 | ; qtot -0.18 |    |     |      |     |       |
| 831    | HAL2         | 14 | MAL | H14A | 831 | 0.09  |
| 1.008  | ; qtot -0.09 |    |     |      |     |       |
| 832    | HAL2         | 14 | MAL | H14B | 832 | 0.09  |
| 1.008  | ; qtot 0     |    |     |      |     |       |
| 833    | CTL2         | 14 | MAL | C15  | 833 | -0.1  |
| 12.011 | ; qtot -0.1  |    |     |      |     |       |
| 834    | HAL2         | 14 | MAL | H15A | 834 | 0.25  |
| 1.008  | ; qtot 0.15  |    |     |      |     |       |
| 835    | HAL2         | 14 | MAL | H15B | 835 | 0.25  |
| 1.008  | ; qtot 0.4   |    |     |      |     |       |
| 836    | NTL          | 14 | MAL | N2   | 836 | -0.6  |
| 14.007 | ; qtot -0.2  |    |     |      |     |       |
| 837    | CTL5         | 14 | MAL | C16  | 837 | -0.35 |
| 12.011 | ; qtot -0.55 |    |     |      |     |       |
| 838    | HL           | 14 | MAL | H16A | 838 | 0.25  |
| 1.008  | ; qtot -0.3  |    |     |      |     |       |
| 839    | HL           | 14 | MAL | H16B | 839 | 0.25  |
| 1.008  | ; qtot -0.05 |    |     |      |     |       |
| 840    | HL           | 14 | MAL | H16C | 840 | 0.25  |
| 1.008  | ; qtot 0.2   |    |     |      |     |       |
| 841    | CTL5         | 14 | MAL | C17  | 841 | -0.35 |
| 12.011 | ; qtot -0.15 |    |     |      |     |       |
| 842    | HL           | 14 | MAL | H17A | 842 | 0.25  |
| 1.008  | ; qtot 0.1   |    |     |      |     |       |
| 843    | HL           | 14 | MAL | H17B | 843 | 0.25  |
| 1.008  | ; qtot 0.35  |    |     |      |     |       |
| 844    | HL           | 14 | MAL | H17C | 844 | 0.25  |
| 1.008  | ; qtot 0.6   |    |     |      |     |       |
| 845    | CTL5         | 14 | MAL | C18  | 845 | -0.35 |
| 12.011 | ; qtot 0.25  |    |     |      |     |       |
| 846    | HL           | 14 | MAL | H18A | 846 | 0.25  |
| 1.008  | ; qtot 0.5   |    |     |      |     |       |
| 847    | HL           | 14 | MAL | H18B | 847 | 0.25  |
| 1.008  | ; qtot 0.75  |    |     |      |     |       |
| 848    | HL           | 14 | MAL | H18C | 848 | 0.25  |
| 1.008  | ; qtot 1     |    |     |      |     |       |
| 849    | CT1          | 14 | MAL | C2   | 849 | -0.09 |
| 12.011 | ; qtot 0.91  |    |     |      |     |       |
| 850    | HB           | 14 | MAL | H2   | 850 | 0.09  |
| 1.008  | ; qtot 1     |    |     |      |     |       |
| 851    | CC           | 14 | MAL | C21  | 851 | 0.34  |
| 12.011 | ; qtot 1.34  |    |     |      |     |       |
| 852    | OC           | 14 | MAL | O21  | 852 | -0.67 |
| 15.999 | ; qtot 0.67  |    |     |      |     |       |



|        |              |    |     |      |     |       |
|--------|--------------|----|-----|------|-----|-------|
| 853    | OC           | 14 | MAL | O22  | 853 | -0.67 |
| 15.999 | ; qtot 0     |    |     |      |     |       |
| 854    | CTL2         | 14 | MAL | C3   | 854 | -0.18 |
| 12.011 | ; qtot -0.18 |    |     |      |     |       |
| 855    | HAL2         | 14 | MAL | H3A  | 855 | 0.09  |
| 1.008  | ; qtot -0.09 |    |     |      |     |       |
| 856    | HAL2         | 14 | MAL | H3B  | 856 | 0.09  |
| 1.008  | ; qtot 0     |    |     |      |     |       |
| 857    | CTL1         | 14 | MAL | C4   | 857 | -0.09 |
| 12.011 | ; qtot -0.09 |    |     |      |     |       |
| 858    | HAL1         | 14 | MAL | H4A  | 858 | 0.09  |
| 1.008  | ; qtot 0     |    |     |      |     |       |
| 859    | CTL2         | 14 | MAL | C41  | 859 | -0.18 |
| 12.011 | ; qtot -0.18 |    |     |      |     |       |
| 860    | HAL2         | 14 | MAL | H41A | 860 | 0.09  |
| 1.008  | ; qtot -0.09 |    |     |      |     |       |
| 861    | HAL2         | 14 | MAL | H41B | 861 | 0.09  |
| 1.008  | ; qtot 0     |    |     |      |     |       |
| 862    | CTL2         | 14 | MAL | C42  | 862 | -0.18 |
| 12.011 | ; qtot -0.18 |    |     |      |     |       |
| 863    | HAL2         | 14 | MAL | H42A | 863 | 0.09  |
| 1.008  | ; qtot -0.09 |    |     |      |     |       |
| 864    | HAL2         | 14 | MAL | H42B | 864 | 0.09  |
| 1.008  | ; qtot 0     |    |     |      |     |       |
| 865    | CTL2         | 14 | MAL | C43  | 865 | -0.18 |
| 12.011 | ; qtot -0.18 |    |     |      |     |       |
| 866    | HAL2         | 14 | MAL | H43A | 866 | 0.09  |
| 1.008  | ; qtot -0.09 |    |     |      |     |       |
| 867    | HAL2         | 14 | MAL | H43B | 867 | 0.09  |
| 1.008  | ; qtot 0     |    |     |      |     |       |
| 868    | CTL2         | 14 | MAL | C44  | 868 | -0.18 |
| 12.011 | ; qtot -0.18 |    |     |      |     |       |
| 869    | HAL2         | 14 | MAL | H44A | 869 | 0.09  |
| 1.008  | ; qtot -0.09 |    |     |      |     |       |
| 870    | HAL2         | 14 | MAL | H44B | 870 | 0.09  |
| 1.008  | ; qtot 0     |    |     |      |     |       |
| 871    | CTL2         | 14 | MAL | C45  | 871 | -0.18 |
| 12.011 | ; qtot -0.18 |    |     |      |     |       |
| 872    | HAL2         | 14 | MAL | H45A | 872 | 0.09  |
| 1.008  | ; qtot -0.09 |    |     |      |     |       |
| 873    | HAL2         | 14 | MAL | H45B | 873 | 0.09  |
| 1.008  | ; qtot 0     |    |     |      |     |       |
| 874    | CTL2         | 14 | MAL | C46  | 874 | -0.18 |
| 12.011 | ; qtot -0.18 |    |     |      |     |       |
| 875    | HAL2         | 14 | MAL | H46A | 875 | 0.09  |
| 1.008  | ; qtot -0.09 |    |     |      |     |       |
| 876    | HAL2         | 14 | MAL | H46B | 876 | 0.09  |
| 1.008  | ; qtot 0     |    |     |      |     |       |
| 877    | CTL2         | 14 | MAL | C47  | 877 | -0.18 |
| 12.011 | ; qtot -0.18 |    |     |      |     |       |
| 878    | HAL2         | 14 | MAL | H47A | 878 | 0.09  |
| 1.008  | ; qtot -0.09 |    |     |      |     |       |
| 879    | HAL2         | 14 | MAL | H47B | 879 | 0.09  |
| 1.008  | ; qtot 0     |    |     |      |     |       |

|                          |              |    |     |      |     |       |
|--------------------------|--------------|----|-----|------|-----|-------|
| 880                      | CTL3         | 14 | MAL | C48  | 880 | -0.27 |
| 12.011                   | ; qtot -0.27 |    |     |      |     |       |
| 881                      | HAL3         | 14 | MAL | H48A | 881 | 0.09  |
| 1.008                    | ; qtot -0.18 |    |     |      |     |       |
| 882                      | HAL3         | 14 | MAL | H48B | 882 | 0.09  |
| 1.008                    | ; qtot -0.09 |    |     |      |     |       |
| 883                      | HAL3         | 14 | MAL | H48C | 883 | 0.09  |
| 1.008                    | ; qtot 0     |    |     |      |     |       |
| ; residue 15 MAL rtp MAL |              |    | q   | 0.0  |     |       |
| 884                      | CT1          | 15 | MAL | C1   | 884 | -0.09 |
| 12.011                   | ; qtot -0.09 |    |     |      |     |       |
| 885                      | HB           | 15 | MAL | H1A  | 885 | 0.09  |
| 1.008                    | ; qtot 0     |    |     |      |     |       |
| 886                      | C            | 15 | MAL | C12  | 886 | 0.51  |
| 12.011                   | ; qtot 0.51  |    |     |      |     |       |
| 887                      | 0            | 15 | MAL | 012  | 887 | -0.51 |
| 15.999                   | ; qtot 0     |    |     |      |     |       |
| 888                      | NH1          | 15 | MAL | N1   | 888 | -0.47 |
| 14.007                   | ; qtot -0.47 |    |     |      |     |       |
| 889                      | H            | 15 | MAL | HN1  | 889 | 0.31  |
| 1.008                    | ; qtot -0.16 |    |     |      |     |       |
| 890                      | CT2          | 15 | MAL | C13  | 890 | -0.02 |
| 12.011                   | ; qtot -0.18 |    |     |      |     |       |
| 891                      | HB           | 15 | MAL | H13A | 891 | 0.09  |
| 1.008                    | ; qtot -0.09 |    |     |      |     |       |
| 892                      | HB           | 15 | MAL | H13B | 892 | 0.09  |
| 1.008                    | ; qtot 0     |    |     |      |     |       |
| 893                      | CTL2         | 15 | MAL | C14  | 893 | -0.18 |
| 12.011                   | ; qtot -0.18 |    |     |      |     |       |
| 894                      | HAL2         | 15 | MAL | H14A | 894 | 0.09  |
| 1.008                    | ; qtot -0.09 |    |     |      |     |       |
| 895                      | HAL2         | 15 | MAL | H14B | 895 | 0.09  |
| 1.008                    | ; qtot 0     |    |     |      |     |       |
| 896                      | CTL2         | 15 | MAL | C15  | 896 | -0.1  |
| 12.011                   | ; qtot -0.1  |    |     |      |     |       |
| 897                      | HAL2         | 15 | MAL | H15A | 897 | 0.25  |
| 1.008                    | ; qtot 0.15  |    |     |      |     |       |
| 898                      | HAL2         | 15 | MAL | H15B | 898 | 0.25  |
| 1.008                    | ; qtot 0.4   |    |     |      |     |       |
| 899                      | NTL          | 15 | MAL | N2   | 899 | -0.6  |
| 14.007                   | ; qtot -0.2  |    |     |      |     |       |
| 900                      | CTL5         | 15 | MAL | C16  | 900 | -0.35 |
| 12.011                   | ; qtot -0.55 |    |     |      |     |       |
| 901                      | HL           | 15 | MAL | H16A | 901 | 0.25  |
| 1.008                    | ; qtot -0.3  |    |     |      |     |       |
| 902                      | HL           | 15 | MAL | H16B | 902 | 0.25  |
| 1.008                    | ; qtot -0.05 |    |     |      |     |       |
| 903                      | HL           | 15 | MAL | H16C | 903 | 0.25  |
| 1.008                    | ; qtot 0.2   |    |     |      |     |       |
| 904                      | CTL5         | 15 | MAL | C17  | 904 | -0.35 |
| 12.011                   | ; qtot -0.15 |    |     |      |     |       |
| 905                      | HL           | 15 | MAL | H17A | 905 | 0.25  |
| 1.008                    | ; qtot 0.1   |    |     |      |     |       |
| 906                      | HL           | 15 | MAL | H17B | 906 | 0.25  |

|        |              |    |     |      |     |       |  |
|--------|--------------|----|-----|------|-----|-------|--|
| 1.008  | ; qtot 0.35  |    |     |      |     |       |  |
| 907    | HL           | 15 | MAL | H17C | 907 | 0.25  |  |
| 1.008  | ; qtot 0.6   |    |     |      |     |       |  |
| 908    | CTL5         | 15 | MAL | C18  | 908 | -0.35 |  |
| 12.011 | ; qtot 0.25  |    |     |      |     |       |  |
| 909    | HL           | 15 | MAL | H18A | 909 | 0.25  |  |
| 1.008  | ; qtot 0.5   |    |     |      |     |       |  |
| 910    | HL           | 15 | MAL | H18B | 910 | 0.25  |  |
| 1.008  | ; qtot 0.75  |    |     |      |     |       |  |
| 911    | HL           | 15 | MAL | H18C | 911 | 0.25  |  |
| 1.008  | ; qtot 1     |    |     |      |     |       |  |
| 912    | CT1          | 15 | MAL | C2   | 912 | -0.09 |  |
| 12.011 | ; qtot 0.91  |    |     |      |     |       |  |
| 913    | HB           | 15 | MAL | H2   | 913 | 0.09  |  |
| 1.008  | ; qtot 1     |    |     |      |     |       |  |
| 914    | CC           | 15 | MAL | C21  | 914 | 0.34  |  |
| 12.011 | ; qtot 1.34  |    |     |      |     |       |  |
| 915    | OC           | 15 | MAL | O21  | 915 | -0.67 |  |
| 15.999 | ; qtot 0.67  |    |     |      |     |       |  |
| 916    | OC           | 15 | MAL | O22  | 916 | -0.67 |  |
| 15.999 | ; qtot 0     |    |     |      |     |       |  |
| 917    | CTL2         | 15 | MAL | C3   | 917 | -0.18 |  |
| 12.011 | ; qtot -0.18 |    |     |      |     |       |  |
| 918    | HAL2         | 15 | MAL | H3A  | 918 | 0.09  |  |
| 1.008  | ; qtot -0.09 |    |     |      |     |       |  |
| 919    | HAL2         | 15 | MAL | H3B  | 919 | 0.09  |  |
| 1.008  | ; qtot 0     |    |     |      |     |       |  |
| 920    | CTL1         | 15 | MAL | C4   | 920 | -0.09 |  |
| 12.011 | ; qtot -0.09 |    |     |      |     |       |  |
| 921    | HAL1         | 15 | MAL | H4A  | 921 | 0.09  |  |
| 1.008  | ; qtot 0     |    |     |      |     |       |  |
| 922    | CTL2         | 15 | MAL | C41  | 922 | -0.18 |  |
| 12.011 | ; qtot -0.18 |    |     |      |     |       |  |
| 923    | HAL2         | 15 | MAL | H41A | 923 | 0.09  |  |
| 1.008  | ; qtot -0.09 |    |     |      |     |       |  |
| 924    | HAL2         | 15 | MAL | H41B | 924 | 0.09  |  |
| 1.008  | ; qtot 0     |    |     |      |     |       |  |
| 925    | CTL2         | 15 | MAL | C42  | 925 | -0.18 |  |
| 12.011 | ; qtot -0.18 |    |     |      |     |       |  |
| 926    | HAL2         | 15 | MAL | H42A | 926 | 0.09  |  |
| 1.008  | ; qtot -0.09 |    |     |      |     |       |  |
| 927    | HAL2         | 15 | MAL | H42B | 927 | 0.09  |  |
| 1.008  | ; qtot 0     |    |     |      |     |       |  |
| 928    | CTL2         | 15 | MAL | C43  | 928 | -0.18 |  |
| 12.011 | ; qtot -0.18 |    |     |      |     |       |  |
| 929    | HAL2         | 15 | MAL | H43A | 929 | 0.09  |  |
| 1.008  | ; qtot -0.09 |    |     |      |     |       |  |
| 930    | HAL2         | 15 | MAL | H43B | 930 | 0.09  |  |
| 1.008  | ; qtot 0     |    |     |      |     |       |  |
| 931    | CTL2         | 15 | MAL | C44  | 931 | -0.18 |  |
| 12.011 | ; qtot -0.18 |    |     |      |     |       |  |
| 932    | HAL2         | 15 | MAL | H44A | 932 | 0.09  |  |
| 1.008  | ; qtot -0.09 |    |     |      |     |       |  |
| 933    | HAL2         | 15 | MAL | H44B | 933 | 0.09  |  |

|           |              |     |     |      |     |       |  |
|-----------|--------------|-----|-----|------|-----|-------|--|
| 1.008     | ; qtot 0     |     |     |      |     |       |  |
| 934       | CTL2         | 15  | MAL | C45  | 934 | -0.18 |  |
| 12.011    | ; qtot -0.18 |     |     |      |     |       |  |
| 935       | HAL2         | 15  | MAL | H45A | 935 | 0.09  |  |
| 1.008     | ; qtot -0.09 |     |     |      |     |       |  |
| 936       | HAL2         | 15  | MAL | H45B | 936 | 0.09  |  |
| 1.008     | ; qtot 0     |     |     |      |     |       |  |
| 937       | CTL2         | 15  | MAL | C46  | 937 | -0.18 |  |
| 12.011    | ; qtot -0.18 |     |     |      |     |       |  |
| 938       | HAL2         | 15  | MAL | H46A | 938 | 0.09  |  |
| 1.008     | ; qtot -0.09 |     |     |      |     |       |  |
| 939       | HAL2         | 15  | MAL | H46B | 939 | 0.09  |  |
| 1.008     | ; qtot 0     |     |     |      |     |       |  |
| 940       | CTL2         | 15  | MAL | C47  | 940 | -0.18 |  |
| 12.011    | ; qtot -0.18 |     |     |      |     |       |  |
| 941       | HAL2         | 15  | MAL | H47A | 941 | 0.09  |  |
| 1.008     | ; qtot -0.09 |     |     |      |     |       |  |
| 942       | HAL2         | 15  | MAL | H47B | 942 | 0.09  |  |
| 1.008     | ; qtot 0     |     |     |      |     |       |  |
| 943       | CTL3         | 15  | MAL | C48  | 943 | -0.27 |  |
| 12.011    | ; qtot -0.27 |     |     |      |     |       |  |
| 944       | HAL3         | 15  | MAL | H48A | 944 | 0.09  |  |
| 1.008     | ; qtot -0.18 |     |     |      |     |       |  |
| 945       | HAL3         | 15  | MAL | H48B | 945 | 0.09  |  |
| 1.008     | ; qtot -0.09 |     |     |      |     |       |  |
| 946       | HAL3         | 15  | MAL | H48C | 946 | 0.09  |  |
| 1.008     | ; qtot 0     |     |     |      |     |       |  |
| ; residue | 16 MAL rtp   | MAL | q   | 0.0  |     |       |  |
| 947       | CT1          | 16  | MAL | C1   | 947 | -0.09 |  |
| 12.011    | ; qtot -0.09 |     |     |      |     |       |  |
| 948       | HB           | 16  | MAL | H1A  | 948 | 0.09  |  |
| 1.008     | ; qtot 0     |     |     |      |     |       |  |
| 949       | C            | 16  | MAL | C12  | 949 | 0.51  |  |
| 12.011    | ; qtot 0.51  |     |     |      |     |       |  |
| 950       | 0            | 16  | MAL | 012  | 950 | -0.51 |  |
| 15.999    | ; qtot 0     |     |     |      |     |       |  |
| 951       | NH1          | 16  | MAL | N1   | 951 | -0.47 |  |
| 14.007    | ; qtot -0.47 |     |     |      |     |       |  |
| 952       | H            | 16  | MAL | HN1  | 952 | 0.31  |  |
| 1.008     | ; qtot -0.16 |     |     |      |     |       |  |
| 953       | CT2          | 16  | MAL | C13  | 953 | -0.02 |  |
| 12.011    | ; qtot -0.18 |     |     |      |     |       |  |
| 954       | HB           | 16  | MAL | H13A | 954 | 0.09  |  |
| 1.008     | ; qtot -0.09 |     |     |      |     |       |  |
| 955       | HB           | 16  | MAL | H13B | 955 | 0.09  |  |
| 1.008     | ; qtot 0     |     |     |      |     |       |  |
| 956       | CTL2         | 16  | MAL | C14  | 956 | -0.18 |  |
| 12.011    | ; qtot -0.18 |     |     |      |     |       |  |
| 957       | HAL2         | 16  | MAL | H14A | 957 | 0.09  |  |
| 1.008     | ; qtot -0.09 |     |     |      |     |       |  |
| 958       | HAL2         | 16  | MAL | H14B | 958 | 0.09  |  |
| 1.008     | ; qtot 0     |     |     |      |     |       |  |
| 959       | CTL2         | 16  | MAL | C15  | 959 | -0.1  |  |
| 12.011    | ; qtot -0.1  |     |     |      |     |       |  |

|        |              |    |     |      |     |       |
|--------|--------------|----|-----|------|-----|-------|
| 960    | HAL2         | 16 | MAL | H15A | 960 | 0.25  |
| 1.008  | ; qtot 0.15  |    |     |      |     |       |
| 961    | HAL2         | 16 | MAL | H15B | 961 | 0.25  |
| 1.008  | ; qtot 0.4   |    |     |      |     |       |
| 962    | NTL          | 16 | MAL | N2   | 962 | -0.6  |
| 14.007 | ; qtot -0.2  |    |     |      |     |       |
| 963    | CTL5         | 16 | MAL | C16  | 963 | -0.35 |
| 12.011 | ; qtot -0.55 |    |     |      |     |       |
| 964    | HL           | 16 | MAL | H16A | 964 | 0.25  |
| 1.008  | ; qtot -0.3  |    |     |      |     |       |
| 965    | HL           | 16 | MAL | H16B | 965 | 0.25  |
| 1.008  | ; qtot -0.05 |    |     |      |     |       |
| 966    | HL           | 16 | MAL | H16C | 966 | 0.25  |
| 1.008  | ; qtot 0.2   |    |     |      |     |       |
| 967    | CTL5         | 16 | MAL | C17  | 967 | -0.35 |
| 12.011 | ; qtot -0.15 |    |     |      |     |       |
| 968    | HL           | 16 | MAL | H17A | 968 | 0.25  |
| 1.008  | ; qtot 0.1   |    |     |      |     |       |
| 969    | HL           | 16 | MAL | H17B | 969 | 0.25  |
| 1.008  | ; qtot 0.35  |    |     |      |     |       |
| 970    | HL           | 16 | MAL | H17C | 970 | 0.25  |
| 1.008  | ; qtot 0.6   |    |     |      |     |       |
| 971    | CTL5         | 16 | MAL | C18  | 971 | -0.35 |
| 12.011 | ; qtot 0.25  |    |     |      |     |       |
| 972    | HL           | 16 | MAL | H18A | 972 | 0.25  |
| 1.008  | ; qtot 0.5   |    |     |      |     |       |
| 973    | HL           | 16 | MAL | H18B | 973 | 0.25  |
| 1.008  | ; qtot 0.75  |    |     |      |     |       |
| 974    | HL           | 16 | MAL | H18C | 974 | 0.25  |
| 1.008  | ; qtot 1     |    |     |      |     |       |
| 975    | CT1          | 16 | MAL | C2   | 975 | -0.09 |
| 12.011 | ; qtot 0.91  |    |     |      |     |       |
| 976    | HB           | 16 | MAL | H2   | 976 | 0.09  |
| 1.008  | ; qtot 1     |    |     |      |     |       |
| 977    | CC           | 16 | MAL | C21  | 977 | 0.34  |
| 12.011 | ; qtot 1.34  |    |     |      |     |       |
| 978    | OC           | 16 | MAL | O21  | 978 | -0.67 |
| 15.999 | ; qtot 0.67  |    |     |      |     |       |
| 979    | OC           | 16 | MAL | O22  | 979 | -0.67 |
| 15.999 | ; qtot 0     |    |     |      |     |       |
| 980    | CTL2         | 16 | MAL | C3   | 980 | -0.18 |
| 12.011 | ; qtot -0.18 |    |     |      |     |       |
| 981    | HAL2         | 16 | MAL | H3A  | 981 | 0.09  |
| 1.008  | ; qtot -0.09 |    |     |      |     |       |
| 982    | HAL2         | 16 | MAL | H3B  | 982 | 0.09  |
| 1.008  | ; qtot 0     |    |     |      |     |       |
| 983    | CTL1         | 16 | MAL | C4   | 983 | -0.09 |
| 12.011 | ; qtot -0.09 |    |     |      |     |       |
| 984    | HAL1         | 16 | MAL | H4A  | 984 | 0.09  |
| 1.008  | ; qtot 0     |    |     |      |     |       |
| 985    | CTL2         | 16 | MAL | C41  | 985 | -0.18 |
| 12.011 | ; qtot -0.18 |    |     |      |     |       |
| 986    | HAL2         | 16 | MAL | H41A | 986 | 0.09  |
| 1.008  | ; qtot -0.09 |    |     |      |     |       |

|           |              |     |     |      |      |       |
|-----------|--------------|-----|-----|------|------|-------|
| 987       | HAL2         | 16  | MAL | H41B | 987  | 0.09  |
| 1.008     | ; qtot 0     |     |     |      |      |       |
| 988       | CTL2         | 16  | MAL | C42  | 988  | -0.18 |
| 12.011    | ; qtot -0.18 |     |     |      |      |       |
| 989       | HAL2         | 16  | MAL | H42A | 989  | 0.09  |
| 1.008     | ; qtot -0.09 |     |     |      |      |       |
| 990       | HAL2         | 16  | MAL | H42B | 990  | 0.09  |
| 1.008     | ; qtot 0     |     |     |      |      |       |
| 991       | CTL2         | 16  | MAL | C43  | 991  | -0.18 |
| 12.011    | ; qtot -0.18 |     |     |      |      |       |
| 992       | HAL2         | 16  | MAL | H43A | 992  | 0.09  |
| 1.008     | ; qtot -0.09 |     |     |      |      |       |
| 993       | HAL2         | 16  | MAL | H43B | 993  | 0.09  |
| 1.008     | ; qtot 0     |     |     |      |      |       |
| 994       | CTL2         | 16  | MAL | C44  | 994  | -0.18 |
| 12.011    | ; qtot -0.18 |     |     |      |      |       |
| 995       | HAL2         | 16  | MAL | H44A | 995  | 0.09  |
| 1.008     | ; qtot -0.09 |     |     |      |      |       |
| 996       | HAL2         | 16  | MAL | H44B | 996  | 0.09  |
| 1.008     | ; qtot 0     |     |     |      |      |       |
| 997       | CTL2         | 16  | MAL | C45  | 997  | -0.18 |
| 12.011    | ; qtot -0.18 |     |     |      |      |       |
| 998       | HAL2         | 16  | MAL | H45A | 998  | 0.09  |
| 1.008     | ; qtot -0.09 |     |     |      |      |       |
| 999       | HAL2         | 16  | MAL | H45B | 999  | 0.09  |
| 1.008     | ; qtot 0     |     |     |      |      |       |
| 1000      | CTL2         | 16  | MAL | C46  | 1000 | -0.18 |
| 12.011    | ; qtot -0.18 |     |     |      |      |       |
| 1001      | HAL2         | 16  | MAL | H46A | 1001 | 0.09  |
| 1.008     | ; qtot -0.09 |     |     |      |      |       |
| 1002      | HAL2         | 16  | MAL | H46B | 1002 | 0.09  |
| 1.008     | ; qtot 0     |     |     |      |      |       |
| 1003      | CTL2         | 16  | MAL | C47  | 1003 | -0.18 |
| 12.011    | ; qtot -0.18 |     |     |      |      |       |
| 1004      | HAL2         | 16  | MAL | H47A | 1004 | 0.09  |
| 1.008     | ; qtot -0.09 |     |     |      |      |       |
| 1005      | HAL2         | 16  | MAL | H47B | 1005 | 0.09  |
| 1.008     | ; qtot 0     |     |     |      |      |       |
| 1006      | CTL3         | 16  | MAL | C48  | 1006 | -0.27 |
| 12.011    | ; qtot -0.27 |     |     |      |      |       |
| 1007      | HAL3         | 16  | MAL | H48A | 1007 | 0.09  |
| 1.008     | ; qtot -0.18 |     |     |      |      |       |
| 1008      | HAL3         | 16  | MAL | H48B | 1008 | 0.09  |
| 1.008     | ; qtot -0.09 |     |     |      |      |       |
| 1009      | HAL3         | 16  | MAL | H48C | 1009 | 0.09  |
| 1.008     | ; qtot 0     |     |     |      |      |       |
| ; residue | 17 MAL rtp   | MAL | q   | 0.0  |      |       |
| 1010      | CT1          | 17  | MAL | C1   | 1010 | -0.09 |
| 12.011    | ; qtot -0.09 |     |     |      |      |       |
| 1011      | HB           | 17  | MAL | H1A  | 1011 | 0.09  |
| 1.008     | ; qtot 0     |     |     |      |      |       |
| 1012      | C            | 17  | MAL | C12  | 1012 | 0.51  |
| 12.011    | ; qtot 0.51  |     |     |      |      |       |
| 1013      | 0            | 17  | MAL | 012  | 1013 | -0.51 |

|        |              |    |     |      |      |       |
|--------|--------------|----|-----|------|------|-------|
| 15.999 | ; qtot 0     |    |     |      |      |       |
| 1014   | NH1          | 17 | MAL | N1   | 1014 | -0.47 |
| 14.007 | ; qtot -0.47 |    |     |      |      |       |
| 1015   | H            | 17 | MAL | HN1  | 1015 | 0.31  |
| 1.008  | ; qtot -0.16 |    |     |      |      |       |
| 1016   | CT2          | 17 | MAL | C13  | 1016 | -0.02 |
| 12.011 | ; qtot -0.18 |    |     |      |      |       |
| 1017   | HB           | 17 | MAL | H13A | 1017 | 0.09  |
| 1.008  | ; qtot -0.09 |    |     |      |      |       |
| 1018   | HB           | 17 | MAL | H13B | 1018 | 0.09  |
| 1.008  | ; qtot 0     |    |     |      |      |       |
| 1019   | CTL2         | 17 | MAL | C14  | 1019 | -0.18 |
| 12.011 | ; qtot -0.18 |    |     |      |      |       |
| 1020   | HAL2         | 17 | MAL | H14A | 1020 | 0.09  |
| 1.008  | ; qtot -0.09 |    |     |      |      |       |
| 1021   | HAL2         | 17 | MAL | H14B | 1021 | 0.09  |
| 1.008  | ; qtot 0     |    |     |      |      |       |
| 1022   | CTL2         | 17 | MAL | C15  | 1022 | -0.1  |
| 12.011 | ; qtot -0.1  |    |     |      |      |       |
| 1023   | HAL2         | 17 | MAL | H15A | 1023 | 0.25  |
| 1.008  | ; qtot 0.15  |    |     |      |      |       |
| 1024   | HAL2         | 17 | MAL | H15B | 1024 | 0.25  |
| 1.008  | ; qtot 0.4   |    |     |      |      |       |
| 1025   | NTL          | 17 | MAL | N2   | 1025 | -0.6  |
| 14.007 | ; qtot -0.2  |    |     |      |      |       |
| 1026   | CTL5         | 17 | MAL | C16  | 1026 | -0.35 |
| 12.011 | ; qtot -0.55 |    |     |      |      |       |
| 1027   | HL           | 17 | MAL | H16A | 1027 | 0.25  |
| 1.008  | ; qtot -0.3  |    |     |      |      |       |
| 1028   | HL           | 17 | MAL | H16B | 1028 | 0.25  |
| 1.008  | ; qtot -0.05 |    |     |      |      |       |
| 1029   | HL           | 17 | MAL | H16C | 1029 | 0.25  |
| 1.008  | ; qtot 0.2   |    |     |      |      |       |
| 1030   | CTL5         | 17 | MAL | C17  | 1030 | -0.35 |
| 12.011 | ; qtot -0.15 |    |     |      |      |       |
| 1031   | HL           | 17 | MAL | H17A | 1031 | 0.25  |
| 1.008  | ; qtot 0.1   |    |     |      |      |       |
| 1032   | HL           | 17 | MAL | H17B | 1032 | 0.25  |
| 1.008  | ; qtot 0.35  |    |     |      |      |       |
| 1033   | HL           | 17 | MAL | H17C | 1033 | 0.25  |
| 1.008  | ; qtot 0.6   |    |     |      |      |       |
| 1034   | CTL5         | 17 | MAL | C18  | 1034 | -0.35 |
| 12.011 | ; qtot 0.25  |    |     |      |      |       |
| 1035   | HL           | 17 | MAL | H18A | 1035 | 0.25  |
| 1.008  | ; qtot 0.5   |    |     |      |      |       |
| 1036   | HL           | 17 | MAL | H18B | 1036 | 0.25  |
| 1.008  | ; qtot 0.75  |    |     |      |      |       |
| 1037   | HL           | 17 | MAL | H18C | 1037 | 0.25  |
| 1.008  | ; qtot 1     |    |     |      |      |       |
| 1038   | CT1          | 17 | MAL | C2   | 1038 | -0.09 |
| 12.011 | ; qtot 0.91  |    |     |      |      |       |
| 1039   | HB           | 17 | MAL | H2   | 1039 | 0.09  |
| 1.008  | ; qtot 1     |    |     |      |      |       |
| 1040   | CC           | 17 | MAL | C21  | 1040 | 0.34  |

|        |              |    |     |      |      |       |
|--------|--------------|----|-----|------|------|-------|
| 12.011 | ; qtot 1.34  |    |     |      |      |       |
| 1041   | OC           | 17 | MAL | 021  | 1041 | -0.67 |
| 15.999 | ; qtot 0.67  |    |     |      |      |       |
| 1042   | OC           | 17 | MAL | 022  | 1042 | -0.67 |
| 15.999 | ; qtot 0     |    |     |      |      |       |
| 1043   | CTL2         | 17 | MAL | C3   | 1043 | -0.18 |
| 12.011 | ; qtot -0.18 |    |     |      |      |       |
| 1044   | HAL2         | 17 | MAL | H3A  | 1044 | 0.09  |
| 1.008  | ; qtot -0.09 |    |     |      |      |       |
| 1045   | HAL2         | 17 | MAL | H3B  | 1045 | 0.09  |
| 1.008  | ; qtot 0     |    |     |      |      |       |
| 1046   | CTL1         | 17 | MAL | C4   | 1046 | -0.09 |
| 12.011 | ; qtot -0.09 |    |     |      |      |       |
| 1047   | HAL1         | 17 | MAL | H4A  | 1047 | 0.09  |
| 1.008  | ; qtot 0     |    |     |      |      |       |
| 1048   | CTL2         | 17 | MAL | C41  | 1048 | -0.18 |
| 12.011 | ; qtot -0.18 |    |     |      |      |       |
| 1049   | HAL2         | 17 | MAL | H41A | 1049 | 0.09  |
| 1.008  | ; qtot -0.09 |    |     |      |      |       |
| 1050   | HAL2         | 17 | MAL | H41B | 1050 | 0.09  |
| 1.008  | ; qtot 0     |    |     |      |      |       |
| 1051   | CTL2         | 17 | MAL | C42  | 1051 | -0.18 |
| 12.011 | ; qtot -0.18 |    |     |      |      |       |
| 1052   | HAL2         | 17 | MAL | H42A | 1052 | 0.09  |
| 1.008  | ; qtot -0.09 |    |     |      |      |       |
| 1053   | HAL2         | 17 | MAL | H42B | 1053 | 0.09  |
| 1.008  | ; qtot 0     |    |     |      |      |       |
| 1054   | CTL2         | 17 | MAL | C43  | 1054 | -0.18 |
| 12.011 | ; qtot -0.18 |    |     |      |      |       |
| 1055   | HAL2         | 17 | MAL | H43A | 1055 | 0.09  |
| 1.008  | ; qtot -0.09 |    |     |      |      |       |
| 1056   | HAL2         | 17 | MAL | H43B | 1056 | 0.09  |
| 1.008  | ; qtot 0     |    |     |      |      |       |
| 1057   | CTL2         | 17 | MAL | C44  | 1057 | -0.18 |
| 12.011 | ; qtot -0.18 |    |     |      |      |       |
| 1058   | HAL2         | 17 | MAL | H44A | 1058 | 0.09  |
| 1.008  | ; qtot -0.09 |    |     |      |      |       |
| 1059   | HAL2         | 17 | MAL | H44B | 1059 | 0.09  |
| 1.008  | ; qtot 0     |    |     |      |      |       |
| 1060   | CTL2         | 17 | MAL | C45  | 1060 | -0.18 |
| 12.011 | ; qtot -0.18 |    |     |      |      |       |
| 1061   | HAL2         | 17 | MAL | H45A | 1061 | 0.09  |
| 1.008  | ; qtot -0.09 |    |     |      |      |       |
| 1062   | HAL2         | 17 | MAL | H45B | 1062 | 0.09  |
| 1.008  | ; qtot 0     |    |     |      |      |       |
| 1063   | CTL2         | 17 | MAL | C46  | 1063 | -0.18 |
| 12.011 | ; qtot -0.18 |    |     |      |      |       |
| 1064   | HAL2         | 17 | MAL | H46A | 1064 | 0.09  |
| 1.008  | ; qtot -0.09 |    |     |      |      |       |
| 1065   | HAL2         | 17 | MAL | H46B | 1065 | 0.09  |
| 1.008  | ; qtot 0     |    |     |      |      |       |
| 1066   | CTL2         | 17 | MAL | C47  | 1066 | -0.18 |
| 12.011 | ; qtot -0.18 |    |     |      |      |       |
| 1067   | HAL2         | 17 | MAL | H47A | 1067 | 0.09  |



|                                |              |    |     |      |      |       |
|--------------------------------|--------------|----|-----|------|------|-------|
| 1.008                          | ; qtot -0.09 |    |     |      |      |       |
| 1068                           | HAL2         | 17 | MAL | H47B | 1068 | 0.09  |
| 1.008                          | ; qtot 0     |    |     |      |      |       |
| 1069                           | CTL3         | 17 | MAL | C48  | 1069 | -0.27 |
| 12.011                         | ; qtot -0.27 |    |     |      |      |       |
| 1070                           | HAL3         | 17 | MAL | H48A | 1070 | 0.09  |
| 1.008                          | ; qtot -0.18 |    |     |      |      |       |
| 1071                           | HAL3         | 17 | MAL | H48B | 1071 | 0.09  |
| 1.008                          | ; qtot -0.09 |    |     |      |      |       |
| 1072                           | HAL3         | 17 | MAL | H48C | 1072 | 0.09  |
| 1.008                          | ; qtot 0     |    |     |      |      |       |
| ; residue 18 MAL rtp MAL q 0.0 |              |    |     |      |      |       |
| 1073                           | CT1          | 18 | MAL | C1   | 1073 | -0.09 |
| 12.011                         | ; qtot -0.09 |    |     |      |      |       |
| 1074                           | HB           | 18 | MAL | H1A  | 1074 | 0.09  |
| 1.008                          | ; qtot 0     |    |     |      |      |       |
| 1075                           | C            | 18 | MAL | C12  | 1075 | 0.51  |
| 12.011                         | ; qtot 0.51  |    |     |      |      |       |
| 1076                           | 0            | 18 | MAL | O12  | 1076 | -0.51 |
| 15.999                         | ; qtot 0     |    |     |      |      |       |
| 1077                           | NH1          | 18 | MAL | N1   | 1077 | -0.47 |
| 14.007                         | ; qtot -0.47 |    |     |      |      |       |
| 1078                           | H            | 18 | MAL | HN1  | 1078 | 0.31  |
| 1.008                          | ; qtot -0.16 |    |     |      |      |       |
| 1079                           | CT2          | 18 | MAL | C13  | 1079 | -0.02 |
| 12.011                         | ; qtot -0.18 |    |     |      |      |       |
| 1080                           | HB           | 18 | MAL | H13A | 1080 | 0.09  |
| 1.008                          | ; qtot -0.09 |    |     |      |      |       |
| 1081                           | HB           | 18 | MAL | H13B | 1081 | 0.09  |
| 1.008                          | ; qtot 0     |    |     |      |      |       |
| 1082                           | CTL2         | 18 | MAL | C14  | 1082 | -0.18 |
| 12.011                         | ; qtot -0.18 |    |     |      |      |       |
| 1083                           | HAL2         | 18 | MAL | H14A | 1083 | 0.09  |
| 1.008                          | ; qtot -0.09 |    |     |      |      |       |
| 1084                           | HAL2         | 18 | MAL | H14B | 1084 | 0.09  |
| 1.008                          | ; qtot 0     |    |     |      |      |       |
| 1085                           | CTL2         | 18 | MAL | C15  | 1085 | -0.1  |
| 12.011                         | ; qtot -0.1  |    |     |      |      |       |
| 1086                           | HAL2         | 18 | MAL | H15A | 1086 | 0.25  |
| 1.008                          | ; qtot 0.15  |    |     |      |      |       |
| 1087                           | HAL2         | 18 | MAL | H15B | 1087 | 0.25  |
| 1.008                          | ; qtot 0.4   |    |     |      |      |       |
| 1088                           | NTL          | 18 | MAL | N2   | 1088 | -0.6  |
| 14.007                         | ; qtot -0.2  |    |     |      |      |       |
| 1089                           | CTL5         | 18 | MAL | C16  | 1089 | -0.35 |
| 12.011                         | ; qtot -0.55 |    |     |      |      |       |
| 1090                           | HL           | 18 | MAL | H16A | 1090 | 0.25  |
| 1.008                          | ; qtot -0.3  |    |     |      |      |       |
| 1091                           | HL           | 18 | MAL | H16B | 1091 | 0.25  |
| 1.008                          | ; qtot -0.05 |    |     |      |      |       |
| 1092                           | HL           | 18 | MAL | H16C | 1092 | 0.25  |
| 1.008                          | ; qtot 0.2   |    |     |      |      |       |
| 1093                           | CTL5         | 18 | MAL | C17  | 1093 | -0.35 |
| 12.011                         | ; qtot -0.15 |    |     |      |      |       |

|        |              |    |     |      |      |       |
|--------|--------------|----|-----|------|------|-------|
| 1094   | HL           | 18 | MAL | H17A | 1094 | 0.25  |
| 1.008  | ; qtot 0.1   |    |     |      |      |       |
| 1095   | HL           | 18 | MAL | H17B | 1095 | 0.25  |
| 1.008  | ; qtot 0.35  |    |     |      |      |       |
| 1096   | HL           | 18 | MAL | H17C | 1096 | 0.25  |
| 1.008  | ; qtot 0.6   |    |     |      |      |       |
| 1097   | CTL5         | 18 | MAL | C18  | 1097 | -0.35 |
| 12.011 | ; qtot 0.25  |    |     |      |      |       |
| 1098   | HL           | 18 | MAL | H18A | 1098 | 0.25  |
| 1.008  | ; qtot 0.5   |    |     |      |      |       |
| 1099   | HL           | 18 | MAL | H18B | 1099 | 0.25  |
| 1.008  | ; qtot 0.75  |    |     |      |      |       |
| 1100   | HL           | 18 | MAL | H18C | 1100 | 0.25  |
| 1.008  | ; qtot 1     |    |     |      |      |       |
| 1101   | CT1          | 18 | MAL | C2   | 1101 | -0.09 |
| 12.011 | ; qtot 0.91  |    |     |      |      |       |
| 1102   | HB           | 18 | MAL | H2   | 1102 | 0.09  |
| 1.008  | ; qtot 1     |    |     |      |      |       |
| 1103   | CC           | 18 | MAL | C21  | 1103 | 0.34  |
| 12.011 | ; qtot 1.34  |    |     |      |      |       |
| 1104   | OC           | 18 | MAL | O21  | 1104 | -0.67 |
| 15.999 | ; qtot 0.67  |    |     |      |      |       |
| 1105   | OC           | 18 | MAL | O22  | 1105 | -0.67 |
| 15.999 | ; qtot 0     |    |     |      |      |       |
| 1106   | CTL2         | 18 | MAL | C3   | 1106 | -0.18 |
| 12.011 | ; qtot -0.18 |    |     |      |      |       |
| 1107   | HAL2         | 18 | MAL | H3A  | 1107 | 0.09  |
| 1.008  | ; qtot -0.09 |    |     |      |      |       |
| 1108   | HAL2         | 18 | MAL | H3B  | 1108 | 0.09  |
| 1.008  | ; qtot 0     |    |     |      |      |       |
| 1109   | CTL1         | 18 | MAL | C4   | 1109 | -0.09 |
| 12.011 | ; qtot -0.09 |    |     |      |      |       |
| 1110   | HAL1         | 18 | MAL | H4A  | 1110 | 0.09  |
| 1.008  | ; qtot 0     |    |     |      |      |       |
| 1111   | CTL2         | 18 | MAL | C41  | 1111 | -0.18 |
| 12.011 | ; qtot -0.18 |    |     |      |      |       |
| 1112   | HAL2         | 18 | MAL | H41A | 1112 | 0.09  |
| 1.008  | ; qtot -0.09 |    |     |      |      |       |
| 1113   | HAL2         | 18 | MAL | H41B | 1113 | 0.09  |
| 1.008  | ; qtot 0     |    |     |      |      |       |
| 1114   | CTL2         | 18 | MAL | C42  | 1114 | -0.18 |
| 12.011 | ; qtot -0.18 |    |     |      |      |       |
| 1115   | HAL2         | 18 | MAL | H42A | 1115 | 0.09  |
| 1.008  | ; qtot -0.09 |    |     |      |      |       |
| 1116   | HAL2         | 18 | MAL | H42B | 1116 | 0.09  |
| 1.008  | ; qtot 0     |    |     |      |      |       |
| 1117   | CTL2         | 18 | MAL | C43  | 1117 | -0.18 |
| 12.011 | ; qtot -0.18 |    |     |      |      |       |
| 1118   | HAL2         | 18 | MAL | H43A | 1118 | 0.09  |
| 1.008  | ; qtot -0.09 |    |     |      |      |       |
| 1119   | HAL2         | 18 | MAL | H43B | 1119 | 0.09  |
| 1.008  | ; qtot 0     |    |     |      |      |       |
| 1120   | CTL2         | 18 | MAL | C44  | 1120 | -0.18 |
| 12.011 | ; qtot -0.18 |    |     |      |      |       |

|                          |              |    |     |      |      |       |
|--------------------------|--------------|----|-----|------|------|-------|
| 1121                     | HAL2         | 18 | MAL | H44A | 1121 | 0.09  |
| 1.008                    | ; qtot -0.09 |    |     |      |      |       |
| 1122                     | HAL2         | 18 | MAL | H44B | 1122 | 0.09  |
| 1.008                    | ; qtot 0     |    |     |      |      |       |
| 1123                     | CTL2         | 18 | MAL | C45  | 1123 | -0.18 |
| 12.011                   | ; qtot -0.18 |    |     |      |      |       |
| 1124                     | HAL2         | 18 | MAL | H45A | 1124 | 0.09  |
| 1.008                    | ; qtot -0.09 |    |     |      |      |       |
| 1125                     | HAL2         | 18 | MAL | H45B | 1125 | 0.09  |
| 1.008                    | ; qtot 0     |    |     |      |      |       |
| 1126                     | CTL2         | 18 | MAL | C46  | 1126 | -0.18 |
| 12.011                   | ; qtot -0.18 |    |     |      |      |       |
| 1127                     | HAL2         | 18 | MAL | H46A | 1127 | 0.09  |
| 1.008                    | ; qtot -0.09 |    |     |      |      |       |
| 1128                     | HAL2         | 18 | MAL | H46B | 1128 | 0.09  |
| 1.008                    | ; qtot 0     |    |     |      |      |       |
| 1129                     | CTL2         | 18 | MAL | C47  | 1129 | -0.18 |
| 12.011                   | ; qtot -0.18 |    |     |      |      |       |
| 1130                     | HAL2         | 18 | MAL | H47A | 1130 | 0.09  |
| 1.008                    | ; qtot -0.09 |    |     |      |      |       |
| 1131                     | HAL2         | 18 | MAL | H47B | 1131 | 0.09  |
| 1.008                    | ; qtot 0     |    |     |      |      |       |
| 1132                     | CTL3         | 18 | MAL | C48  | 1132 | -0.27 |
| 12.011                   | ; qtot -0.27 |    |     |      |      |       |
| 1133                     | HAL3         | 18 | MAL | H48A | 1133 | 0.09  |
| 1.008                    | ; qtot -0.18 |    |     |      |      |       |
| 1134                     | HAL3         | 18 | MAL | H48B | 1134 | 0.09  |
| 1.008                    | ; qtot -0.09 |    |     |      |      |       |
| 1135                     | HAL3         | 18 | MAL | H48C | 1135 | 0.09  |
| 1.008                    | ; qtot 0     |    |     |      |      |       |
| ; residue 19 MAL rtp MAL |              |    | q   | 0.0  |      |       |
| 1136                     | CT1          | 19 | MAL | C1   | 1136 | -0.09 |
| 12.011                   | ; qtot -0.09 |    |     |      |      |       |
| 1137                     | HB           | 19 | MAL | H1A  | 1137 | 0.09  |
| 1.008                    | ; qtot 0     |    |     |      |      |       |
| 1138                     | C            | 19 | MAL | C12  | 1138 | 0.51  |
| 12.011                   | ; qtot 0.51  |    |     |      |      |       |
| 1139                     | 0            | 19 | MAL | 012  | 1139 | -0.51 |
| 15.999                   | ; qtot 0     |    |     |      |      |       |
| 1140                     | NH1          | 19 | MAL | N1   | 1140 | -0.47 |
| 14.007                   | ; qtot -0.47 |    |     |      |      |       |
| 1141                     | H            | 19 | MAL | HN1  | 1141 | 0.31  |
| 1.008                    | ; qtot -0.16 |    |     |      |      |       |
| 1142                     | CT2          | 19 | MAL | C13  | 1142 | -0.02 |
| 12.011                   | ; qtot -0.18 |    |     |      |      |       |
| 1143                     | HB           | 19 | MAL | H13A | 1143 | 0.09  |
| 1.008                    | ; qtot -0.09 |    |     |      |      |       |
| 1144                     | HB           | 19 | MAL | H13B | 1144 | 0.09  |
| 1.008                    | ; qtot 0     |    |     |      |      |       |
| 1145                     | CTL2         | 19 | MAL | C14  | 1145 | -0.18 |
| 12.011                   | ; qtot -0.18 |    |     |      |      |       |
| 1146                     | HAL2         | 19 | MAL | H14A | 1146 | 0.09  |
| 1.008                    | ; qtot -0.09 |    |     |      |      |       |
| 1147                     | HAL2         | 19 | MAL | H14B | 1147 | 0.09  |

|        |              |    |     |      |      |       |  |
|--------|--------------|----|-----|------|------|-------|--|
| 1.008  | ; qtot 0     |    |     |      |      |       |  |
| 1148   | CTL2         | 19 | MAL | C15  | 1148 | -0.1  |  |
| 12.011 | ; qtot -0.1  |    |     |      |      |       |  |
| 1149   | HAL2         | 19 | MAL | H15A | 1149 | 0.25  |  |
| 1.008  | ; qtot 0.15  |    |     |      |      |       |  |
| 1150   | HAL2         | 19 | MAL | H15B | 1150 | 0.25  |  |
| 1.008  | ; qtot 0.4   |    |     |      |      |       |  |
| 1151   | NTL          | 19 | MAL | N2   | 1151 | -0.6  |  |
| 14.007 | ; qtot -0.2  |    |     |      |      |       |  |
| 1152   | CTL5         | 19 | MAL | C16  | 1152 | -0.35 |  |
| 12.011 | ; qtot -0.55 |    |     |      |      |       |  |
| 1153   | HL           | 19 | MAL | H16A | 1153 | 0.25  |  |
| 1.008  | ; qtot -0.3  |    |     |      |      |       |  |
| 1154   | HL           | 19 | MAL | H16B | 1154 | 0.25  |  |
| 1.008  | ; qtot -0.05 |    |     |      |      |       |  |
| 1155   | HL           | 19 | MAL | H16C | 1155 | 0.25  |  |
| 1.008  | ; qtot 0.2   |    |     |      |      |       |  |
| 1156   | CTL5         | 19 | MAL | C17  | 1156 | -0.35 |  |
| 12.011 | ; qtot -0.15 |    |     |      |      |       |  |
| 1157   | HL           | 19 | MAL | H17A | 1157 | 0.25  |  |
| 1.008  | ; qtot 0.1   |    |     |      |      |       |  |
| 1158   | HL           | 19 | MAL | H17B | 1158 | 0.25  |  |
| 1.008  | ; qtot 0.35  |    |     |      |      |       |  |
| 1159   | HL           | 19 | MAL | H17C | 1159 | 0.25  |  |
| 1.008  | ; qtot 0.6   |    |     |      |      |       |  |
| 1160   | CTL5         | 19 | MAL | C18  | 1160 | -0.35 |  |
| 12.011 | ; qtot 0.25  |    |     |      |      |       |  |
| 1161   | HL           | 19 | MAL | H18A | 1161 | 0.25  |  |
| 1.008  | ; qtot 0.5   |    |     |      |      |       |  |
| 1162   | HL           | 19 | MAL | H18B | 1162 | 0.25  |  |
| 1.008  | ; qtot 0.75  |    |     |      |      |       |  |
| 1163   | HL           | 19 | MAL | H18C | 1163 | 0.25  |  |
| 1.008  | ; qtot 1     |    |     |      |      |       |  |
| 1164   | CT1          | 19 | MAL | C2   | 1164 | -0.09 |  |
| 12.011 | ; qtot 0.91  |    |     |      |      |       |  |
| 1165   | HB           | 19 | MAL | H2   | 1165 | 0.09  |  |
| 1.008  | ; qtot 1     |    |     |      |      |       |  |
| 1166   | CC           | 19 | MAL | C21  | 1166 | 0.34  |  |
| 12.011 | ; qtot 1.34  |    |     |      |      |       |  |
| 1167   | OC           | 19 | MAL | O21  | 1167 | -0.67 |  |
| 15.999 | ; qtot 0.67  |    |     |      |      |       |  |
| 1168   | OC           | 19 | MAL | O22  | 1168 | -0.67 |  |
| 15.999 | ; qtot 0     |    |     |      |      |       |  |
| 1169   | CTL2         | 19 | MAL | C3   | 1169 | -0.18 |  |
| 12.011 | ; qtot -0.18 |    |     |      |      |       |  |
| 1170   | HAL2         | 19 | MAL | H3A  | 1170 | 0.09  |  |
| 1.008  | ; qtot -0.09 |    |     |      |      |       |  |
| 1171   | HAL2         | 19 | MAL | H3B  | 1171 | 0.09  |  |
| 1.008  | ; qtot 0     |    |     |      |      |       |  |
| 1172   | CTL1         | 19 | MAL | C4   | 1172 | -0.09 |  |
| 12.011 | ; qtot -0.09 |    |     |      |      |       |  |
| 1173   | HAL1         | 19 | MAL | H4A  | 1173 | 0.09  |  |
| 1.008  | ; qtot 0     |    |     |      |      |       |  |
| 1174   | CTL2         | 19 | MAL | C41  | 1174 | -0.18 |  |

|        |                                |    |     |      |      |       |  |
|--------|--------------------------------|----|-----|------|------|-------|--|
| 12.011 | ; qtot -0.18                   |    |     |      |      |       |  |
| 1175   | HAL2                           | 19 | MAL | H41A | 1175 | 0.09  |  |
| 1.008  | ; qtot -0.09                   |    |     |      |      |       |  |
| 1176   | HAL2                           | 19 | MAL | H41B | 1176 | 0.09  |  |
| 1.008  | ; qtot 0                       |    |     |      |      |       |  |
| 1177   | CTL2                           | 19 | MAL | C42  | 1177 | -0.18 |  |
| 12.011 | ; qtot -0.18                   |    |     |      |      |       |  |
| 1178   | HAL2                           | 19 | MAL | H42A | 1178 | 0.09  |  |
| 1.008  | ; qtot -0.09                   |    |     |      |      |       |  |
| 1179   | HAL2                           | 19 | MAL | H42B | 1179 | 0.09  |  |
| 1.008  | ; qtot 0                       |    |     |      |      |       |  |
| 1180   | CTL2                           | 19 | MAL | C43  | 1180 | -0.18 |  |
| 12.011 | ; qtot -0.18                   |    |     |      |      |       |  |
| 1181   | HAL2                           | 19 | MAL | H43A | 1181 | 0.09  |  |
| 1.008  | ; qtot -0.09                   |    |     |      |      |       |  |
| 1182   | HAL2                           | 19 | MAL | H43B | 1182 | 0.09  |  |
| 1.008  | ; qtot 0                       |    |     |      |      |       |  |
| 1183   | CTL2                           | 19 | MAL | C44  | 1183 | -0.18 |  |
| 12.011 | ; qtot -0.18                   |    |     |      |      |       |  |
| 1184   | HAL2                           | 19 | MAL | H44A | 1184 | 0.09  |  |
| 1.008  | ; qtot -0.09                   |    |     |      |      |       |  |
| 1185   | HAL2                           | 19 | MAL | H44B | 1185 | 0.09  |  |
| 1.008  | ; qtot 0                       |    |     |      |      |       |  |
| 1186   | CTL2                           | 19 | MAL | C45  | 1186 | -0.18 |  |
| 12.011 | ; qtot -0.18                   |    |     |      |      |       |  |
| 1187   | HAL2                           | 19 | MAL | H45A | 1187 | 0.09  |  |
| 1.008  | ; qtot -0.09                   |    |     |      |      |       |  |
| 1188   | HAL2                           | 19 | MAL | H45B | 1188 | 0.09  |  |
| 1.008  | ; qtot 0                       |    |     |      |      |       |  |
| 1189   | CTL2                           | 19 | MAL | C46  | 1189 | -0.18 |  |
| 12.011 | ; qtot -0.18                   |    |     |      |      |       |  |
| 1190   | HAL2                           | 19 | MAL | H46A | 1190 | 0.09  |  |
| 1.008  | ; qtot -0.09                   |    |     |      |      |       |  |
| 1191   | HAL2                           | 19 | MAL | H46B | 1191 | 0.09  |  |
| 1.008  | ; qtot 0                       |    |     |      |      |       |  |
| 1192   | CTL2                           | 19 | MAL | C47  | 1192 | -0.18 |  |
| 12.011 | ; qtot -0.18                   |    |     |      |      |       |  |
| 1193   | HAL2                           | 19 | MAL | H47A | 1193 | 0.09  |  |
| 1.008  | ; qtot -0.09                   |    |     |      |      |       |  |
| 1194   | HAL2                           | 19 | MAL | H47B | 1194 | 0.09  |  |
| 1.008  | ; qtot 0                       |    |     |      |      |       |  |
| 1195   | CTL3                           | 19 | MAL | C48  | 1195 | -0.27 |  |
| 12.011 | ; qtot -0.27                   |    |     |      |      |       |  |
| 1196   | HAL3                           | 19 | MAL | H48A | 1196 | 0.09  |  |
| 1.008  | ; qtot -0.18                   |    |     |      |      |       |  |
| 1197   | HAL3                           | 19 | MAL | H48B | 1197 | 0.09  |  |
| 1.008  | ; qtot -0.09                   |    |     |      |      |       |  |
| 1198   | HAL3                           | 19 | MAL | H48C | 1198 | 0.09  |  |
| 1.008  | ; qtot 0                       |    |     |      |      |       |  |
|        | ; residue 20 MAL rtp MAL q 0.0 |    |     |      |      |       |  |
| 1199   | CT1                            | 20 | MAL | C1   | 1199 | -0.09 |  |
| 12.011 | ; qtot -0.09                   |    |     |      |      |       |  |
| 1200   | HB                             | 20 | MAL | H1A  | 1200 | 0.09  |  |
| 1.008  | ; qtot 0                       |    |     |      |      |       |  |

|        |              |    |     |      |      |       |
|--------|--------------|----|-----|------|------|-------|
| 1201   | C            | 20 | MAL | C12  | 1201 | 0.51  |
| 12.011 | ; qtot 0.51  |    |     |      |      |       |
| 1202   | 0            | 20 | MAL | 012  | 1202 | -0.51 |
| 15.999 | ; qtot 0     |    |     |      |      |       |
| 1203   | NH1          | 20 | MAL | N1   | 1203 | -0.47 |
| 14.007 | ; qtot -0.47 |    |     |      |      |       |
| 1204   | H            | 20 | MAL | HN1  | 1204 | 0.31  |
| 1.008  | ; qtot -0.16 |    |     |      |      |       |
| 1205   | CT2          | 20 | MAL | C13  | 1205 | -0.02 |
| 12.011 | ; qtot -0.18 |    |     |      |      |       |
| 1206   | HB           | 20 | MAL | H13A | 1206 | 0.09  |
| 1.008  | ; qtot -0.09 |    |     |      |      |       |
| 1207   | HB           | 20 | MAL | H13B | 1207 | 0.09  |
| 1.008  | ; qtot 0     |    |     |      |      |       |
| 1208   | CTL2         | 20 | MAL | C14  | 1208 | -0.18 |
| 12.011 | ; qtot -0.18 |    |     |      |      |       |
| 1209   | HAL2         | 20 | MAL | H14A | 1209 | 0.09  |
| 1.008  | ; qtot -0.09 |    |     |      |      |       |
| 1210   | HAL2         | 20 | MAL | H14B | 1210 | 0.09  |
| 1.008  | ; qtot 0     |    |     |      |      |       |
| 1211   | CTL2         | 20 | MAL | C15  | 1211 | -0.1  |
| 12.011 | ; qtot -0.1  |    |     |      |      |       |
| 1212   | HAL2         | 20 | MAL | H15A | 1212 | 0.25  |
| 1.008  | ; qtot 0.15  |    |     |      |      |       |
| 1213   | HAL2         | 20 | MAL | H15B | 1213 | 0.25  |
| 1.008  | ; qtot 0.4   |    |     |      |      |       |
| 1214   | NTL          | 20 | MAL | N2   | 1214 | -0.6  |
| 14.007 | ; qtot -0.2  |    |     |      |      |       |
| 1215   | CTL5         | 20 | MAL | C16  | 1215 | -0.35 |
| 12.011 | ; qtot -0.55 |    |     |      |      |       |
| 1216   | HL           | 20 | MAL | H16A | 1216 | 0.25  |
| 1.008  | ; qtot -0.3  |    |     |      |      |       |
| 1217   | HL           | 20 | MAL | H16B | 1217 | 0.25  |
| 1.008  | ; qtot -0.05 |    |     |      |      |       |
| 1218   | HL           | 20 | MAL | H16C | 1218 | 0.25  |
| 1.008  | ; qtot 0.2   |    |     |      |      |       |
| 1219   | CTL5         | 20 | MAL | C17  | 1219 | -0.35 |
| 12.011 | ; qtot -0.15 |    |     |      |      |       |
| 1220   | HL           | 20 | MAL | H17A | 1220 | 0.25  |
| 1.008  | ; qtot 0.1   |    |     |      |      |       |
| 1221   | HL           | 20 | MAL | H17B | 1221 | 0.25  |
| 1.008  | ; qtot 0.35  |    |     |      |      |       |
| 1222   | HL           | 20 | MAL | H17C | 1222 | 0.25  |
| 1.008  | ; qtot 0.6   |    |     |      |      |       |
| 1223   | CTL5         | 20 | MAL | C18  | 1223 | -0.35 |
| 12.011 | ; qtot 0.25  |    |     |      |      |       |
| 1224   | HL           | 20 | MAL | H18A | 1224 | 0.25  |
| 1.008  | ; qtot 0.5   |    |     |      |      |       |
| 1225   | HL           | 20 | MAL | H18B | 1225 | 0.25  |
| 1.008  | ; qtot 0.75  |    |     |      |      |       |
| 1226   | HL           | 20 | MAL | H18C | 1226 | 0.25  |
| 1.008  | ; qtot 1     |    |     |      |      |       |
| 1227   | CT1          | 20 | MAL | C2   | 1227 | -0.09 |
| 12.011 | ; qtot 0.91  |    |     |      |      |       |

|        |              |    |     |      |      |       |
|--------|--------------|----|-----|------|------|-------|
| 1228   | HB           | 20 | MAL | H2   | 1228 | 0.09  |
| 1.008  | ; qtot 1     |    |     |      |      |       |
| 1229   | CC           | 20 | MAL | C21  | 1229 | 0.34  |
| 12.011 | ; qtot 1.34  |    |     |      |      |       |
| 1230   | OC           | 20 | MAL | 021  | 1230 | -0.67 |
| 15.999 | ; qtot 0.67  |    |     |      |      |       |
| 1231   | OC           | 20 | MAL | 022  | 1231 | -0.67 |
| 15.999 | ; qtot 0     |    |     |      |      |       |
| 1232   | CTL2         | 20 | MAL | C3   | 1232 | -0.18 |
| 12.011 | ; qtot -0.18 |    |     |      |      |       |
| 1233   | HAL2         | 20 | MAL | H3A  | 1233 | 0.09  |
| 1.008  | ; qtot -0.09 |    |     |      |      |       |
| 1234   | HAL2         | 20 | MAL | H3B  | 1234 | 0.09  |
| 1.008  | ; qtot 0     |    |     |      |      |       |
| 1235   | CTL1         | 20 | MAL | C4   | 1235 | -0.09 |
| 12.011 | ; qtot -0.09 |    |     |      |      |       |
| 1236   | HAL1         | 20 | MAL | H4A  | 1236 | 0.09  |
| 1.008  | ; qtot 0     |    |     |      |      |       |
| 1237   | CTL2         | 20 | MAL | C41  | 1237 | -0.18 |
| 12.011 | ; qtot -0.18 |    |     |      |      |       |
| 1238   | HAL2         | 20 | MAL | H41A | 1238 | 0.09  |
| 1.008  | ; qtot -0.09 |    |     |      |      |       |
| 1239   | HAL2         | 20 | MAL | H41B | 1239 | 0.09  |
| 1.008  | ; qtot 0     |    |     |      |      |       |
| 1240   | CTL2         | 20 | MAL | C42  | 1240 | -0.18 |
| 12.011 | ; qtot -0.18 |    |     |      |      |       |
| 1241   | HAL2         | 20 | MAL | H42A | 1241 | 0.09  |
| 1.008  | ; qtot -0.09 |    |     |      |      |       |
| 1242   | HAL2         | 20 | MAL | H42B | 1242 | 0.09  |
| 1.008  | ; qtot 0     |    |     |      |      |       |
| 1243   | CTL2         | 20 | MAL | C43  | 1243 | -0.18 |
| 12.011 | ; qtot -0.18 |    |     |      |      |       |
| 1244   | HAL2         | 20 | MAL | H43A | 1244 | 0.09  |
| 1.008  | ; qtot -0.09 |    |     |      |      |       |
| 1245   | HAL2         | 20 | MAL | H43B | 1245 | 0.09  |
| 1.008  | ; qtot 0     |    |     |      |      |       |
| 1246   | CTL2         | 20 | MAL | C44  | 1246 | -0.18 |
| 12.011 | ; qtot -0.18 |    |     |      |      |       |
| 1247   | HAL2         | 20 | MAL | H44A | 1247 | 0.09  |
| 1.008  | ; qtot -0.09 |    |     |      |      |       |
| 1248   | HAL2         | 20 | MAL | H44B | 1248 | 0.09  |
| 1.008  | ; qtot 0     |    |     |      |      |       |
| 1249   | CTL2         | 20 | MAL | C45  | 1249 | -0.18 |
| 12.011 | ; qtot -0.18 |    |     |      |      |       |
| 1250   | HAL2         | 20 | MAL | H45A | 1250 | 0.09  |
| 1.008  | ; qtot -0.09 |    |     |      |      |       |
| 1251   | HAL2         | 20 | MAL | H45B | 1251 | 0.09  |
| 1.008  | ; qtot 0     |    |     |      |      |       |
| 1252   | CTL2         | 20 | MAL | C46  | 1252 | -0.18 |
| 12.011 | ; qtot -0.18 |    |     |      |      |       |
| 1253   | HAL2         | 20 | MAL | H46A | 1253 | 0.09  |
| 1.008  | ; qtot -0.09 |    |     |      |      |       |
| 1254   | HAL2         | 20 | MAL | H46B | 1254 | 0.09  |
| 1.008  | ; qtot 0     |    |     |      |      |       |

|                                |              |    |     |      |      |       |
|--------------------------------|--------------|----|-----|------|------|-------|
| 1255                           | CTL2         | 20 | MAL | C47  | 1255 | -0.18 |
| 12.011                         | ; qtot -0.18 |    |     |      |      |       |
| 1256                           | HAL2         | 20 | MAL | H47A | 1256 | 0.09  |
| 1.008                          | ; qtot -0.09 |    |     |      |      |       |
| 1257                           | HAL2         | 20 | MAL | H47B | 1257 | 0.09  |
| 1.008                          | ; qtot 0     |    |     |      |      |       |
| 1258                           | CTL3         | 20 | MAL | C48  | 1258 | -0.27 |
| 12.011                         | ; qtot -0.27 |    |     |      |      |       |
| 1259                           | HAL3         | 20 | MAL | H48A | 1259 | 0.09  |
| 1.008                          | ; qtot -0.18 |    |     |      |      |       |
| 1260                           | HAL3         | 20 | MAL | H48B | 1260 | 0.09  |
| 1.008                          | ; qtot -0.09 |    |     |      |      |       |
| 1261                           | HAL3         | 20 | MAL | H48C | 1261 | 0.09  |
| 1.008                          | ; qtot 0     |    |     |      |      |       |
| ; residue 21 MAL rtp MAL q 0.0 |              |    |     |      |      |       |
| 1262                           | CT1          | 21 | MAL | C1   | 1262 | -0.09 |
| 12.011                         | ; qtot -0.09 |    |     |      |      |       |
| 1263                           | HB           | 21 | MAL | H1A  | 1263 | 0.09  |
| 1.008                          | ; qtot 0     |    |     |      |      |       |
| 1264                           | C            | 21 | MAL | C12  | 1264 | 0.51  |
| 12.011                         | ; qtot 0.51  |    |     |      |      |       |
| 1265                           | 0            | 21 | MAL | 012  | 1265 | -0.51 |
| 15.999                         | ; qtot 0     |    |     |      |      |       |
| 1266                           | NH1          | 21 | MAL | N1   | 1266 | -0.47 |
| 14.007                         | ; qtot -0.47 |    |     |      |      |       |
| 1267                           | H            | 21 | MAL | HN1  | 1267 | 0.31  |
| 1.008                          | ; qtot -0.16 |    |     |      |      |       |
| 1268                           | CT2          | 21 | MAL | C13  | 1268 | -0.02 |
| 12.011                         | ; qtot -0.18 |    |     |      |      |       |
| 1269                           | HB           | 21 | MAL | H13A | 1269 | 0.09  |
| 1.008                          | ; qtot -0.09 |    |     |      |      |       |
| 1270                           | HB           | 21 | MAL | H13B | 1270 | 0.09  |
| 1.008                          | ; qtot 0     |    |     |      |      |       |
| 1271                           | CTL2         | 21 | MAL | C14  | 1271 | -0.18 |
| 12.011                         | ; qtot -0.18 |    |     |      |      |       |
| 1272                           | HAL2         | 21 | MAL | H14A | 1272 | 0.09  |
| 1.008                          | ; qtot -0.09 |    |     |      |      |       |
| 1273                           | HAL2         | 21 | MAL | H14B | 1273 | 0.09  |
| 1.008                          | ; qtot 0     |    |     |      |      |       |
| 1274                           | CTL2         | 21 | MAL | C15  | 1274 | -0.1  |
| 12.011                         | ; qtot -0.1  |    |     |      |      |       |
| 1275                           | HAL2         | 21 | MAL | H15A | 1275 | 0.25  |
| 1.008                          | ; qtot 0.15  |    |     |      |      |       |
| 1276                           | HAL2         | 21 | MAL | H15B | 1276 | 0.25  |
| 1.008                          | ; qtot 0.4   |    |     |      |      |       |
| 1277                           | NTL          | 21 | MAL | N2   | 1277 | -0.6  |
| 14.007                         | ; qtot -0.2  |    |     |      |      |       |
| 1278                           | CTL5         | 21 | MAL | C16  | 1278 | -0.35 |
| 12.011                         | ; qtot -0.55 |    |     |      |      |       |
| 1279                           | HL           | 21 | MAL | H16A | 1279 | 0.25  |
| 1.008                          | ; qtot -0.3  |    |     |      |      |       |
| 1280                           | HL           | 21 | MAL | H16B | 1280 | 0.25  |
| 1.008                          | ; qtot -0.05 |    |     |      |      |       |
| 1281                           | HL           | 21 | MAL | H16C | 1281 | 0.25  |



|        |              |    |     |      |      |       |  |
|--------|--------------|----|-----|------|------|-------|--|
| 1.008  | ; qtot 0.2   |    |     |      |      |       |  |
| 1282   | CTL5         | 21 | MAL | C17  | 1282 | -0.35 |  |
| 12.011 | ; qtot -0.15 |    |     |      |      |       |  |
| 1283   | HL           | 21 | MAL | H17A | 1283 | 0.25  |  |
| 1.008  | ; qtot 0.1   |    |     |      |      |       |  |
| 1284   | HL           | 21 | MAL | H17B | 1284 | 0.25  |  |
| 1.008  | ; qtot 0.35  |    |     |      |      |       |  |
| 1285   | HL           | 21 | MAL | H17C | 1285 | 0.25  |  |
| 1.008  | ; qtot 0.6   |    |     |      |      |       |  |
| 1286   | CTL5         | 21 | MAL | C18  | 1286 | -0.35 |  |
| 12.011 | ; qtot 0.25  |    |     |      |      |       |  |
| 1287   | HL           | 21 | MAL | H18A | 1287 | 0.25  |  |
| 1.008  | ; qtot 0.5   |    |     |      |      |       |  |
| 1288   | HL           | 21 | MAL | H18B | 1288 | 0.25  |  |
| 1.008  | ; qtot 0.75  |    |     |      |      |       |  |
| 1289   | HL           | 21 | MAL | H18C | 1289 | 0.25  |  |
| 1.008  | ; qtot 1     |    |     |      |      |       |  |
| 1290   | CT1          | 21 | MAL | C2   | 1290 | -0.09 |  |
| 12.011 | ; qtot 0.91  |    |     |      |      |       |  |
| 1291   | HB           | 21 | MAL | H2   | 1291 | 0.09  |  |
| 1.008  | ; qtot 1     |    |     |      |      |       |  |
| 1292   | CC           | 21 | MAL | C21  | 1292 | 0.34  |  |
| 12.011 | ; qtot 1.34  |    |     |      |      |       |  |
| 1293   | OC           | 21 | MAL | O21  | 1293 | -0.67 |  |
| 15.999 | ; qtot 0.67  |    |     |      |      |       |  |
| 1294   | OC           | 21 | MAL | O22  | 1294 | -0.67 |  |
| 15.999 | ; qtot 0     |    |     |      |      |       |  |
| 1295   | CTL2         | 21 | MAL | C3   | 1295 | -0.18 |  |
| 12.011 | ; qtot -0.18 |    |     |      |      |       |  |
| 1296   | HAL2         | 21 | MAL | H3A  | 1296 | 0.09  |  |
| 1.008  | ; qtot -0.09 |    |     |      |      |       |  |
| 1297   | HAL2         | 21 | MAL | H3B  | 1297 | 0.09  |  |
| 1.008  | ; qtot 0     |    |     |      |      |       |  |
| 1298   | CTL1         | 21 | MAL | C4   | 1298 | -0.09 |  |
| 12.011 | ; qtot -0.09 |    |     |      |      |       |  |
| 1299   | HAL1         | 21 | MAL | H4A  | 1299 | 0.09  |  |
| 1.008  | ; qtot 0     |    |     |      |      |       |  |
| 1300   | CTL2         | 21 | MAL | C41  | 1300 | -0.18 |  |
| 12.011 | ; qtot -0.18 |    |     |      |      |       |  |
| 1301   | HAL2         | 21 | MAL | H41A | 1301 | 0.09  |  |
| 1.008  | ; qtot -0.09 |    |     |      |      |       |  |
| 1302   | HAL2         | 21 | MAL | H41B | 1302 | 0.09  |  |
| 1.008  | ; qtot 0     |    |     |      |      |       |  |
| 1303   | CTL2         | 21 | MAL | C42  | 1303 | -0.18 |  |
| 12.011 | ; qtot -0.18 |    |     |      |      |       |  |
| 1304   | HAL2         | 21 | MAL | H42A | 1304 | 0.09  |  |
| 1.008  | ; qtot -0.09 |    |     |      |      |       |  |
| 1305   | HAL2         | 21 | MAL | H42B | 1305 | 0.09  |  |
| 1.008  | ; qtot 0     |    |     |      |      |       |  |
| 1306   | CTL2         | 21 | MAL | C43  | 1306 | -0.18 |  |
| 12.011 | ; qtot -0.18 |    |     |      |      |       |  |
| 1307   | HAL2         | 21 | MAL | H43A | 1307 | 0.09  |  |
| 1.008  | ; qtot -0.09 |    |     |      |      |       |  |
| 1308   | HAL2         | 21 | MAL | H43B | 1308 | 0.09  |  |

|        |              |    |     |      |      |       |  |
|--------|--------------|----|-----|------|------|-------|--|
| 1.008  | ; qtot 0     |    |     |      |      |       |  |
| 1309   | CTL2         | 21 | MAL | C44  | 1309 | -0.18 |  |
| 12.011 | ; qtot -0.18 |    |     |      |      |       |  |
| 1310   | HAL2         | 21 | MAL | H44A | 1310 | 0.09  |  |
| 1.008  | ; qtot -0.09 |    |     |      |      |       |  |
| 1311   | HAL2         | 21 | MAL | H44B | 1311 | 0.09  |  |
| 1.008  | ; qtot 0     |    |     |      |      |       |  |
| 1312   | CTL2         | 21 | MAL | C45  | 1312 | -0.18 |  |
| 12.011 | ; qtot -0.18 |    |     |      |      |       |  |
| 1313   | HAL2         | 21 | MAL | H45A | 1313 | 0.09  |  |
| 1.008  | ; qtot -0.09 |    |     |      |      |       |  |
| 1314   | HAL2         | 21 | MAL | H45B | 1314 | 0.09  |  |
| 1.008  | ; qtot 0     |    |     |      |      |       |  |
| 1315   | CTL2         | 21 | MAL | C46  | 1315 | -0.18 |  |
| 12.011 | ; qtot -0.18 |    |     |      |      |       |  |
| 1316   | HAL2         | 21 | MAL | H46A | 1316 | 0.09  |  |
| 1.008  | ; qtot -0.09 |    |     |      |      |       |  |
| 1317   | HAL2         | 21 | MAL | H46B | 1317 | 0.09  |  |
| 1.008  | ; qtot 0     |    |     |      |      |       |  |
| 1318   | CTL2         | 21 | MAL | C47  | 1318 | -0.18 |  |
| 12.011 | ; qtot -0.18 |    |     |      |      |       |  |
| 1319   | HAL2         | 21 | MAL | H47A | 1319 | 0.09  |  |
| 1.008  | ; qtot -0.09 |    |     |      |      |       |  |
| 1320   | HAL2         | 21 | MAL | H47B | 1320 | 0.09  |  |
| 1.008  | ; qtot 0     |    |     |      |      |       |  |
| 1321   | CTL3         | 21 | MAL | C48  | 1321 | -0.27 |  |
| 12.011 | ; qtot -0.27 |    |     |      |      |       |  |
| 1322   | HAL3         | 21 | MAL | H48A | 1322 | 0.09  |  |
| 1.008  | ; qtot -0.18 |    |     |      |      |       |  |
| 1323   | HAL3         | 21 | MAL | H48B | 1323 | 0.09  |  |
| 1.008  | ; qtot -0.09 |    |     |      |      |       |  |
| 1324   | HAL3         | 21 | MAL | H48C | 1324 | 0.09  |  |
| 1.008  | ; qtot 0     |    |     |      |      |       |  |
|        | ; residue    | 22 | MAL | rtp  | MAL  | q 0.0 |  |
| 1325   | CT1          | 22 | MAL | C1   | 1325 | -0.09 |  |
| 12.011 | ; qtot -0.09 |    |     |      |      |       |  |
| 1326   | HB           | 22 | MAL | H1A  | 1326 | 0.09  |  |
| 1.008  | ; qtot 0     |    |     |      |      |       |  |
| 1327   | C            | 22 | MAL | C12  | 1327 | 0.51  |  |
| 12.011 | ; qtot 0.51  |    |     |      |      |       |  |
| 1328   | 0            | 22 | MAL | 012  | 1328 | -0.51 |  |
| 15.999 | ; qtot 0     |    |     |      |      |       |  |
| 1329   | NH1          | 22 | MAL | N1   | 1329 | -0.47 |  |
| 14.007 | ; qtot -0.47 |    |     |      |      |       |  |
| 1330   | H            | 22 | MAL | HN1  | 1330 | 0.31  |  |
| 1.008  | ; qtot -0.16 |    |     |      |      |       |  |
| 1331   | CT2          | 22 | MAL | C13  | 1331 | -0.02 |  |
| 12.011 | ; qtot -0.18 |    |     |      |      |       |  |
| 1332   | HB           | 22 | MAL | H13A | 1332 | 0.09  |  |
| 1.008  | ; qtot -0.09 |    |     |      |      |       |  |
| 1333   | HB           | 22 | MAL | H13B | 1333 | 0.09  |  |
| 1.008  | ; qtot 0     |    |     |      |      |       |  |
| 1334   | CTL2         | 22 | MAL | C14  | 1334 | -0.18 |  |
| 12.011 | ; qtot -0.18 |    |     |      |      |       |  |

|        |              |    |     |      |      |       |
|--------|--------------|----|-----|------|------|-------|
| 1335   | HAL2         | 22 | MAL | H14A | 1335 | 0.09  |
| 1.008  | ; qtot -0.09 |    |     |      |      |       |
| 1336   | HAL2         | 22 | MAL | H14B | 1336 | 0.09  |
| 1.008  | ; qtot 0     |    |     |      |      |       |
| 1337   | CTL2         | 22 | MAL | C15  | 1337 | -0.1  |
| 12.011 | ; qtot -0.1  |    |     |      |      |       |
| 1338   | HAL2         | 22 | MAL | H15A | 1338 | 0.25  |
| 1.008  | ; qtot 0.15  |    |     |      |      |       |
| 1339   | HAL2         | 22 | MAL | H15B | 1339 | 0.25  |
| 1.008  | ; qtot 0.4   |    |     |      |      |       |
| 1340   | NTL          | 22 | MAL | N2   | 1340 | -0.6  |
| 14.007 | ; qtot -0.2  |    |     |      |      |       |
| 1341   | CTL5         | 22 | MAL | C16  | 1341 | -0.35 |
| 12.011 | ; qtot -0.55 |    |     |      |      |       |
| 1342   | HL           | 22 | MAL | H16A | 1342 | 0.25  |
| 1.008  | ; qtot -0.3  |    |     |      |      |       |
| 1343   | HL           | 22 | MAL | H16B | 1343 | 0.25  |
| 1.008  | ; qtot -0.05 |    |     |      |      |       |
| 1344   | HL           | 22 | MAL | H16C | 1344 | 0.25  |
| 1.008  | ; qtot 0.2   |    |     |      |      |       |
| 1345   | CTL5         | 22 | MAL | C17  | 1345 | -0.35 |
| 12.011 | ; qtot -0.15 |    |     |      |      |       |
| 1346   | HL           | 22 | MAL | H17A | 1346 | 0.25  |
| 1.008  | ; qtot 0.1   |    |     |      |      |       |
| 1347   | HL           | 22 | MAL | H17B | 1347 | 0.25  |
| 1.008  | ; qtot 0.35  |    |     |      |      |       |
| 1348   | HL           | 22 | MAL | H17C | 1348 | 0.25  |
| 1.008  | ; qtot 0.6   |    |     |      |      |       |
| 1349   | CTL5         | 22 | MAL | C18  | 1349 | -0.35 |
| 12.011 | ; qtot 0.25  |    |     |      |      |       |
| 1350   | HL           | 22 | MAL | H18A | 1350 | 0.25  |
| 1.008  | ; qtot 0.5   |    |     |      |      |       |
| 1351   | HL           | 22 | MAL | H18B | 1351 | 0.25  |
| 1.008  | ; qtot 0.75  |    |     |      |      |       |
| 1352   | HL           | 22 | MAL | H18C | 1352 | 0.25  |
| 1.008  | ; qtot 1     |    |     |      |      |       |
| 1353   | CT1          | 22 | MAL | C2   | 1353 | -0.09 |
| 12.011 | ; qtot 0.91  |    |     |      |      |       |
| 1354   | HB           | 22 | MAL | H2   | 1354 | 0.09  |
| 1.008  | ; qtot 1     |    |     |      |      |       |
| 1355   | CC           | 22 | MAL | C21  | 1355 | 0.34  |
| 12.011 | ; qtot 1.34  |    |     |      |      |       |
| 1356   | OC           | 22 | MAL | O21  | 1356 | -0.67 |
| 15.999 | ; qtot 0.67  |    |     |      |      |       |
| 1357   | OC           | 22 | MAL | O22  | 1357 | -0.67 |
| 15.999 | ; qtot 0     |    |     |      |      |       |
| 1358   | CTL2         | 22 | MAL | C3   | 1358 | -0.18 |
| 12.011 | ; qtot -0.18 |    |     |      |      |       |
| 1359   | HAL2         | 22 | MAL | H3A  | 1359 | 0.09  |
| 1.008  | ; qtot -0.09 |    |     |      |      |       |
| 1360   | HAL2         | 22 | MAL | H3B  | 1360 | 0.09  |
| 1.008  | ; qtot 0     |    |     |      |      |       |
| 1361   | CTL1         | 22 | MAL | C4   | 1361 | -0.09 |
| 12.011 | ; qtot -0.09 |    |     |      |      |       |

|                                |              |    |     |      |      |       |
|--------------------------------|--------------|----|-----|------|------|-------|
| 1362                           | HAL1         | 22 | MAL | H4A  | 1362 | 0.09  |
| 1.008                          | ; qtot 0     |    |     |      |      |       |
| 1363                           | CTL2         | 22 | MAL | C41  | 1363 | -0.18 |
| 12.011                         | ; qtot -0.18 |    |     |      |      |       |
| 1364                           | HAL2         | 22 | MAL | H41A | 1364 | 0.09  |
| 1.008                          | ; qtot -0.09 |    |     |      |      |       |
| 1365                           | HAL2         | 22 | MAL | H41B | 1365 | 0.09  |
| 1.008                          | ; qtot 0     |    |     |      |      |       |
| 1366                           | CTL2         | 22 | MAL | C42  | 1366 | -0.18 |
| 12.011                         | ; qtot -0.18 |    |     |      |      |       |
| 1367                           | HAL2         | 22 | MAL | H42A | 1367 | 0.09  |
| 1.008                          | ; qtot -0.09 |    |     |      |      |       |
| 1368                           | HAL2         | 22 | MAL | H42B | 1368 | 0.09  |
| 1.008                          | ; qtot 0     |    |     |      |      |       |
| 1369                           | CTL2         | 22 | MAL | C43  | 1369 | -0.18 |
| 12.011                         | ; qtot -0.18 |    |     |      |      |       |
| 1370                           | HAL2         | 22 | MAL | H43A | 1370 | 0.09  |
| 1.008                          | ; qtot -0.09 |    |     |      |      |       |
| 1371                           | HAL2         | 22 | MAL | H43B | 1371 | 0.09  |
| 1.008                          | ; qtot 0     |    |     |      |      |       |
| 1372                           | CTL2         | 22 | MAL | C44  | 1372 | -0.18 |
| 12.011                         | ; qtot -0.18 |    |     |      |      |       |
| 1373                           | HAL2         | 22 | MAL | H44A | 1373 | 0.09  |
| 1.008                          | ; qtot -0.09 |    |     |      |      |       |
| 1374                           | HAL2         | 22 | MAL | H44B | 1374 | 0.09  |
| 1.008                          | ; qtot 0     |    |     |      |      |       |
| 1375                           | CTL2         | 22 | MAL | C45  | 1375 | -0.18 |
| 12.011                         | ; qtot -0.18 |    |     |      |      |       |
| 1376                           | HAL2         | 22 | MAL | H45A | 1376 | 0.09  |
| 1.008                          | ; qtot -0.09 |    |     |      |      |       |
| 1377                           | HAL2         | 22 | MAL | H45B | 1377 | 0.09  |
| 1.008                          | ; qtot 0     |    |     |      |      |       |
| 1378                           | CTL2         | 22 | MAL | C46  | 1378 | -0.18 |
| 12.011                         | ; qtot -0.18 |    |     |      |      |       |
| 1379                           | HAL2         | 22 | MAL | H46A | 1379 | 0.09  |
| 1.008                          | ; qtot -0.09 |    |     |      |      |       |
| 1380                           | HAL2         | 22 | MAL | H46B | 1380 | 0.09  |
| 1.008                          | ; qtot 0     |    |     |      |      |       |
| 1381                           | CTL2         | 22 | MAL | C47  | 1381 | -0.18 |
| 12.011                         | ; qtot -0.18 |    |     |      |      |       |
| 1382                           | HAL2         | 22 | MAL | H47A | 1382 | 0.09  |
| 1.008                          | ; qtot -0.09 |    |     |      |      |       |
| 1383                           | HAL2         | 22 | MAL | H47B | 1383 | 0.09  |
| 1.008                          | ; qtot 0     |    |     |      |      |       |
| 1384                           | CTL3         | 22 | MAL | C48  | 1384 | -0.27 |
| 12.011                         | ; qtot -0.27 |    |     |      |      |       |
| 1385                           | HAL3         | 22 | MAL | H48A | 1385 | 0.09  |
| 1.008                          | ; qtot -0.18 |    |     |      |      |       |
| 1386                           | HAL3         | 22 | MAL | H48B | 1386 | 0.09  |
| 1.008                          | ; qtot -0.09 |    |     |      |      |       |
| 1387                           | HAL3         | 22 | MAL | H48C | 1387 | 0.09  |
| 1.008                          | ; qtot 0     |    |     |      |      |       |
| ; residue 23 MAL rtp MAL q 0.0 |              |    |     |      |      |       |
| 1388                           | CT1          | 23 | MAL | C1   | 1388 | -0.09 |

|        |              |    |     |      |      |       |  |
|--------|--------------|----|-----|------|------|-------|--|
| 12.011 | ; qtot -0.09 |    |     |      |      |       |  |
| 1389   | HB           | 23 | MAL | H1A  | 1389 | 0.09  |  |
| 1.008  | ; qtot 0     |    |     |      |      |       |  |
| 1390   | C            | 23 | MAL | C12  | 1390 | 0.51  |  |
| 12.011 | ; qtot 0.51  |    |     |      |      |       |  |
| 1391   | 0            | 23 | MAL | 012  | 1391 | -0.51 |  |
| 15.999 | ; qtot 0     |    |     |      |      |       |  |
| 1392   | NH1          | 23 | MAL | N1   | 1392 | -0.47 |  |
| 14.007 | ; qtot -0.47 |    |     |      |      |       |  |
| 1393   | H            | 23 | MAL | HN1  | 1393 | 0.31  |  |
| 1.008  | ; qtot -0.16 |    |     |      |      |       |  |
| 1394   | CT2          | 23 | MAL | C13  | 1394 | -0.02 |  |
| 12.011 | ; qtot -0.18 |    |     |      |      |       |  |
| 1395   | HB           | 23 | MAL | H13A | 1395 | 0.09  |  |
| 1.008  | ; qtot -0.09 |    |     |      |      |       |  |
| 1396   | HB           | 23 | MAL | H13B | 1396 | 0.09  |  |
| 1.008  | ; qtot 0     |    |     |      |      |       |  |
| 1397   | CTL2         | 23 | MAL | C14  | 1397 | -0.18 |  |
| 12.011 | ; qtot -0.18 |    |     |      |      |       |  |
| 1398   | HAL2         | 23 | MAL | H14A | 1398 | 0.09  |  |
| 1.008  | ; qtot -0.09 |    |     |      |      |       |  |
| 1399   | HAL2         | 23 | MAL | H14B | 1399 | 0.09  |  |
| 1.008  | ; qtot 0     |    |     |      |      |       |  |
| 1400   | CTL2         | 23 | MAL | C15  | 1400 | -0.1  |  |
| 12.011 | ; qtot -0.1  |    |     |      |      |       |  |
| 1401   | HAL2         | 23 | MAL | H15A | 1401 | 0.25  |  |
| 1.008  | ; qtot 0.15  |    |     |      |      |       |  |
| 1402   | HAL2         | 23 | MAL | H15B | 1402 | 0.25  |  |
| 1.008  | ; qtot 0.4   |    |     |      |      |       |  |
| 1403   | NTL          | 23 | MAL | N2   | 1403 | -0.6  |  |
| 14.007 | ; qtot -0.2  |    |     |      |      |       |  |
| 1404   | CTL5         | 23 | MAL | C16  | 1404 | -0.35 |  |
| 12.011 | ; qtot -0.55 |    |     |      |      |       |  |
| 1405   | HL           | 23 | MAL | H16A | 1405 | 0.25  |  |
| 1.008  | ; qtot -0.3  |    |     |      |      |       |  |
| 1406   | HL           | 23 | MAL | H16B | 1406 | 0.25  |  |
| 1.008  | ; qtot -0.05 |    |     |      |      |       |  |
| 1407   | HL           | 23 | MAL | H16C | 1407 | 0.25  |  |
| 1.008  | ; qtot 0.2   |    |     |      |      |       |  |
| 1408   | CTL5         | 23 | MAL | C17  | 1408 | -0.35 |  |
| 12.011 | ; qtot -0.15 |    |     |      |      |       |  |
| 1409   | HL           | 23 | MAL | H17A | 1409 | 0.25  |  |
| 1.008  | ; qtot 0.1   |    |     |      |      |       |  |
| 1410   | HL           | 23 | MAL | H17B | 1410 | 0.25  |  |
| 1.008  | ; qtot 0.35  |    |     |      |      |       |  |
| 1411   | HL           | 23 | MAL | H17C | 1411 | 0.25  |  |
| 1.008  | ; qtot 0.6   |    |     |      |      |       |  |
| 1412   | CTL5         | 23 | MAL | C18  | 1412 | -0.35 |  |
| 12.011 | ; qtot 0.25  |    |     |      |      |       |  |
| 1413   | HL           | 23 | MAL | H18A | 1413 | 0.25  |  |
| 1.008  | ; qtot 0.5   |    |     |      |      |       |  |
| 1414   | HL           | 23 | MAL | H18B | 1414 | 0.25  |  |
| 1.008  | ; qtot 0.75  |    |     |      |      |       |  |
| 1415   | HL           | 23 | MAL | H18C | 1415 | 0.25  |  |

|        |              |    |     |      |      |       |  |
|--------|--------------|----|-----|------|------|-------|--|
| 1.008  | ; qtot 1     |    |     |      |      |       |  |
| 1416   | CT1          | 23 | MAL | C2   | 1416 | -0.09 |  |
| 12.011 | ; qtot 0.91  |    |     |      |      |       |  |
| 1417   | HB           | 23 | MAL | H2   | 1417 | 0.09  |  |
| 1.008  | ; qtot 1     |    |     |      |      |       |  |
| 1418   | CC           | 23 | MAL | C21  | 1418 | 0.34  |  |
| 12.011 | ; qtot 1.34  |    |     |      |      |       |  |
| 1419   | OC           | 23 | MAL | 021  | 1419 | -0.67 |  |
| 15.999 | ; qtot 0.67  |    |     |      |      |       |  |
| 1420   | OC           | 23 | MAL | 022  | 1420 | -0.67 |  |
| 15.999 | ; qtot 0     |    |     |      |      |       |  |
| 1421   | CTL2         | 23 | MAL | C3   | 1421 | -0.18 |  |
| 12.011 | ; qtot -0.18 |    |     |      |      |       |  |
| 1422   | HAL2         | 23 | MAL | H3A  | 1422 | 0.09  |  |
| 1.008  | ; qtot -0.09 |    |     |      |      |       |  |
| 1423   | HAL2         | 23 | MAL | H3B  | 1423 | 0.09  |  |
| 1.008  | ; qtot 0     |    |     |      |      |       |  |
| 1424   | CTL1         | 23 | MAL | C4   | 1424 | -0.09 |  |
| 12.011 | ; qtot -0.09 |    |     |      |      |       |  |
| 1425   | HAL1         | 23 | MAL | H4A  | 1425 | 0.09  |  |
| 1.008  | ; qtot 0     |    |     |      |      |       |  |
| 1426   | CTL2         | 23 | MAL | C41  | 1426 | -0.18 |  |
| 12.011 | ; qtot -0.18 |    |     |      |      |       |  |
| 1427   | HAL2         | 23 | MAL | H41A | 1427 | 0.09  |  |
| 1.008  | ; qtot -0.09 |    |     |      |      |       |  |
| 1428   | HAL2         | 23 | MAL | H41B | 1428 | 0.09  |  |
| 1.008  | ; qtot 0     |    |     |      |      |       |  |
| 1429   | CTL2         | 23 | MAL | C42  | 1429 | -0.18 |  |
| 12.011 | ; qtot -0.18 |    |     |      |      |       |  |
| 1430   | HAL2         | 23 | MAL | H42A | 1430 | 0.09  |  |
| 1.008  | ; qtot -0.09 |    |     |      |      |       |  |
| 1431   | HAL2         | 23 | MAL | H42B | 1431 | 0.09  |  |
| 1.008  | ; qtot 0     |    |     |      |      |       |  |
| 1432   | CTL2         | 23 | MAL | C43  | 1432 | -0.18 |  |
| 12.011 | ; qtot -0.18 |    |     |      |      |       |  |
| 1433   | HAL2         | 23 | MAL | H43A | 1433 | 0.09  |  |
| 1.008  | ; qtot -0.09 |    |     |      |      |       |  |
| 1434   | HAL2         | 23 | MAL | H43B | 1434 | 0.09  |  |
| 1.008  | ; qtot 0     |    |     |      |      |       |  |
| 1435   | CTL2         | 23 | MAL | C44  | 1435 | -0.18 |  |
| 12.011 | ; qtot -0.18 |    |     |      |      |       |  |
| 1436   | HAL2         | 23 | MAL | H44A | 1436 | 0.09  |  |
| 1.008  | ; qtot -0.09 |    |     |      |      |       |  |
| 1437   | HAL2         | 23 | MAL | H44B | 1437 | 0.09  |  |
| 1.008  | ; qtot 0     |    |     |      |      |       |  |
| 1438   | CTL2         | 23 | MAL | C45  | 1438 | -0.18 |  |
| 12.011 | ; qtot -0.18 |    |     |      |      |       |  |
| 1439   | HAL2         | 23 | MAL | H45A | 1439 | 0.09  |  |
| 1.008  | ; qtot -0.09 |    |     |      |      |       |  |
| 1440   | HAL2         | 23 | MAL | H45B | 1440 | 0.09  |  |
| 1.008  | ; qtot 0     |    |     |      |      |       |  |
| 1441   | CTL2         | 23 | MAL | C46  | 1441 | -0.18 |  |
| 12.011 | ; qtot -0.18 |    |     |      |      |       |  |
| 1442   | HAL2         | 23 | MAL | H46A | 1442 | 0.09  |  |

|        |                          |    |     |      |      |       |  |
|--------|--------------------------|----|-----|------|------|-------|--|
| 1.008  | ; qtot -0.09             |    |     |      |      |       |  |
| 1443   | HAL2                     | 23 | MAL | H46B | 1443 | 0.09  |  |
| 1.008  | ; qtot 0                 |    |     |      |      |       |  |
| 1444   | CTL2                     | 23 | MAL | C47  | 1444 | -0.18 |  |
| 12.011 | ; qtot -0.18             |    |     |      |      |       |  |
| 1445   | HAL2                     | 23 | MAL | H47A | 1445 | 0.09  |  |
| 1.008  | ; qtot -0.09             |    |     |      |      |       |  |
| 1446   | HAL2                     | 23 | MAL | H47B | 1446 | 0.09  |  |
| 1.008  | ; qtot 0                 |    |     |      |      |       |  |
| 1447   | CTL3                     | 23 | MAL | C48  | 1447 | -0.27 |  |
| 12.011 | ; qtot -0.27             |    |     |      |      |       |  |
| 1448   | HAL3                     | 23 | MAL | H48A | 1448 | 0.09  |  |
| 1.008  | ; qtot -0.18             |    |     |      |      |       |  |
| 1449   | HAL3                     | 23 | MAL | H48B | 1449 | 0.09  |  |
| 1.008  | ; qtot -0.09             |    |     |      |      |       |  |
| 1450   | HAL3                     | 23 | MAL | H48C | 1450 | 0.09  |  |
| 1.008  | ; qtot 0                 |    |     |      |      |       |  |
|        | ; residue 24 MAL rtp MAL |    | q   | 0.0  |      |       |  |
| 1451   | CT1                      | 24 | MAL | C1   | 1451 | -0.09 |  |
| 12.011 | ; qtot -0.09             |    |     |      |      |       |  |
| 1452   | HB                       | 24 | MAL | H1A  | 1452 | 0.09  |  |
| 1.008  | ; qtot 0                 |    |     |      |      |       |  |
| 1453   | C                        | 24 | MAL | C12  | 1453 | 0.51  |  |
| 12.011 | ; qtot 0.51              |    |     |      |      |       |  |
| 1454   | 0                        | 24 | MAL | 012  | 1454 | -0.51 |  |
| 15.999 | ; qtot 0                 |    |     |      |      |       |  |
| 1455   | NH1                      | 24 | MAL | N1   | 1455 | -0.47 |  |
| 14.007 | ; qtot -0.47             |    |     |      |      |       |  |
| 1456   | H                        | 24 | MAL | HN1  | 1456 | 0.31  |  |
| 1.008  | ; qtot -0.16             |    |     |      |      |       |  |
| 1457   | CT2                      | 24 | MAL | C13  | 1457 | -0.02 |  |
| 12.011 | ; qtot -0.18             |    |     |      |      |       |  |
| 1458   | HB                       | 24 | MAL | H13A | 1458 | 0.09  |  |
| 1.008  | ; qtot -0.09             |    |     |      |      |       |  |
| 1459   | HB                       | 24 | MAL | H13B | 1459 | 0.09  |  |
| 1.008  | ; qtot 0                 |    |     |      |      |       |  |
| 1460   | CTL2                     | 24 | MAL | C14  | 1460 | -0.18 |  |
| 12.011 | ; qtot -0.18             |    |     |      |      |       |  |
| 1461   | HAL2                     | 24 | MAL | H14A | 1461 | 0.09  |  |
| 1.008  | ; qtot -0.09             |    |     |      |      |       |  |
| 1462   | HAL2                     | 24 | MAL | H14B | 1462 | 0.09  |  |
| 1.008  | ; qtot 0                 |    |     |      |      |       |  |
| 1463   | CTL2                     | 24 | MAL | C15  | 1463 | -0.1  |  |
| 12.011 | ; qtot -0.1              |    |     |      |      |       |  |
| 1464   | HAL2                     | 24 | MAL | H15A | 1464 | 0.25  |  |
| 1.008  | ; qtot 0.15              |    |     |      |      |       |  |
| 1465   | HAL2                     | 24 | MAL | H15B | 1465 | 0.25  |  |
| 1.008  | ; qtot 0.4               |    |     |      |      |       |  |
| 1466   | NTL                      | 24 | MAL | N2   | 1466 | -0.6  |  |
| 14.007 | ; qtot -0.2              |    |     |      |      |       |  |
| 1467   | CTL5                     | 24 | MAL | C16  | 1467 | -0.35 |  |
| 12.011 | ; qtot -0.55             |    |     |      |      |       |  |
| 1468   | HL                       | 24 | MAL | H16A | 1468 | 0.25  |  |
| 1.008  | ; qtot -0.3              |    |     |      |      |       |  |

|        |              |    |     |      |      |       |
|--------|--------------|----|-----|------|------|-------|
| 1469   | HL           | 24 | MAL | H16B | 1469 | 0.25  |
| 1.008  | ; qtot -0.05 |    |     |      |      |       |
| 1470   | HL           | 24 | MAL | H16C | 1470 | 0.25  |
| 1.008  | ; qtot 0.2   |    |     |      |      |       |
| 1471   | CTL5         | 24 | MAL | C17  | 1471 | -0.35 |
| 12.011 | ; qtot -0.15 |    |     |      |      |       |
| 1472   | HL           | 24 | MAL | H17A | 1472 | 0.25  |
| 1.008  | ; qtot 0.1   |    |     |      |      |       |
| 1473   | HL           | 24 | MAL | H17B | 1473 | 0.25  |
| 1.008  | ; qtot 0.35  |    |     |      |      |       |
| 1474   | HL           | 24 | MAL | H17C | 1474 | 0.25  |
| 1.008  | ; qtot 0.6   |    |     |      |      |       |
| 1475   | CTL5         | 24 | MAL | C18  | 1475 | -0.35 |
| 12.011 | ; qtot 0.25  |    |     |      |      |       |
| 1476   | HL           | 24 | MAL | H18A | 1476 | 0.25  |
| 1.008  | ; qtot 0.5   |    |     |      |      |       |
| 1477   | HL           | 24 | MAL | H18B | 1477 | 0.25  |
| 1.008  | ; qtot 0.75  |    |     |      |      |       |
| 1478   | HL           | 24 | MAL | H18C | 1478 | 0.25  |
| 1.008  | ; qtot 1     |    |     |      |      |       |
| 1479   | CT1          | 24 | MAL | C2   | 1479 | -0.09 |
| 12.011 | ; qtot 0.91  |    |     |      |      |       |
| 1480   | HB           | 24 | MAL | H2   | 1480 | 0.09  |
| 1.008  | ; qtot 1     |    |     |      |      |       |
| 1481   | CC           | 24 | MAL | C21  | 1481 | 0.34  |
| 12.011 | ; qtot 1.34  |    |     |      |      |       |
| 1482   | OC           | 24 | MAL | O21  | 1482 | -0.67 |
| 15.999 | ; qtot 0.67  |    |     |      |      |       |
| 1483   | OC           | 24 | MAL | O22  | 1483 | -0.67 |
| 15.999 | ; qtot 0     |    |     |      |      |       |
| 1484   | CTL2         | 24 | MAL | C3   | 1484 | -0.18 |
| 12.011 | ; qtot -0.18 |    |     |      |      |       |
| 1485   | HAL2         | 24 | MAL | H3A  | 1485 | 0.09  |
| 1.008  | ; qtot -0.09 |    |     |      |      |       |
| 1486   | HAL2         | 24 | MAL | H3B  | 1486 | 0.09  |
| 1.008  | ; qtot 0     |    |     |      |      |       |
| 1487   | CTL1         | 24 | MAL | C4   | 1487 | -0.09 |
| 12.011 | ; qtot -0.09 |    |     |      |      |       |
| 1488   | HAL1         | 24 | MAL | H4A  | 1488 | 0.09  |
| 1.008  | ; qtot 0     |    |     |      |      |       |
| 1489   | CTL2         | 24 | MAL | C41  | 1489 | -0.18 |
| 12.011 | ; qtot -0.18 |    |     |      |      |       |
| 1490   | HAL2         | 24 | MAL | H41A | 1490 | 0.09  |
| 1.008  | ; qtot -0.09 |    |     |      |      |       |
| 1491   | HAL2         | 24 | MAL | H41B | 1491 | 0.09  |
| 1.008  | ; qtot 0     |    |     |      |      |       |
| 1492   | CTL2         | 24 | MAL | C42  | 1492 | -0.18 |
| 12.011 | ; qtot -0.18 |    |     |      |      |       |
| 1493   | HAL2         | 24 | MAL | H42A | 1493 | 0.09  |
| 1.008  | ; qtot -0.09 |    |     |      |      |       |
| 1494   | HAL2         | 24 | MAL | H42B | 1494 | 0.09  |
| 1.008  | ; qtot 0     |    |     |      |      |       |
| 1495   | CTL2         | 24 | MAL | C43  | 1495 | -0.18 |
| 12.011 | ; qtot -0.18 |    |     |      |      |       |



|                                |              |    |     |      |      |       |
|--------------------------------|--------------|----|-----|------|------|-------|
| 1496                           | HAL2         | 24 | MAL | H43A | 1496 | 0.09  |
| 1.008                          | ; qtot -0.09 |    |     |      |      |       |
| 1497                           | HAL2         | 24 | MAL | H43B | 1497 | 0.09  |
| 1.008                          | ; qtot 0     |    |     |      |      |       |
| 1498                           | CTL2         | 24 | MAL | C44  | 1498 | -0.18 |
| 12.011                         | ; qtot -0.18 |    |     |      |      |       |
| 1499                           | HAL2         | 24 | MAL | H44A | 1499 | 0.09  |
| 1.008                          | ; qtot -0.09 |    |     |      |      |       |
| 1500                           | HAL2         | 24 | MAL | H44B | 1500 | 0.09  |
| 1.008                          | ; qtot 0     |    |     |      |      |       |
| 1501                           | CTL2         | 24 | MAL | C45  | 1501 | -0.18 |
| 12.011                         | ; qtot -0.18 |    |     |      |      |       |
| 1502                           | HAL2         | 24 | MAL | H45A | 1502 | 0.09  |
| 1.008                          | ; qtot -0.09 |    |     |      |      |       |
| 1503                           | HAL2         | 24 | MAL | H45B | 1503 | 0.09  |
| 1.008                          | ; qtot 0     |    |     |      |      |       |
| 1504                           | CTL2         | 24 | MAL | C46  | 1504 | -0.18 |
| 12.011                         | ; qtot -0.18 |    |     |      |      |       |
| 1505                           | HAL2         | 24 | MAL | H46A | 1505 | 0.09  |
| 1.008                          | ; qtot -0.09 |    |     |      |      |       |
| 1506                           | HAL2         | 24 | MAL | H46B | 1506 | 0.09  |
| 1.008                          | ; qtot 0     |    |     |      |      |       |
| 1507                           | CTL2         | 24 | MAL | C47  | 1507 | -0.18 |
| 12.011                         | ; qtot -0.18 |    |     |      |      |       |
| 1508                           | HAL2         | 24 | MAL | H47A | 1508 | 0.09  |
| 1.008                          | ; qtot -0.09 |    |     |      |      |       |
| 1509                           | HAL2         | 24 | MAL | H47B | 1509 | 0.09  |
| 1.008                          | ; qtot 0     |    |     |      |      |       |
| 1510                           | CTL3         | 24 | MAL | C48  | 1510 | -0.27 |
| 12.011                         | ; qtot -0.27 |    |     |      |      |       |
| 1511                           | HAL3         | 24 | MAL | H48A | 1511 | 0.09  |
| 1.008                          | ; qtot -0.18 |    |     |      |      |       |
| 1512                           | HAL3         | 24 | MAL | H48B | 1512 | 0.09  |
| 1.008                          | ; qtot -0.09 |    |     |      |      |       |
| 1513                           | HAL3         | 24 | MAL | H48C | 1513 | 0.09  |
| 1.008                          | ; qtot 0     |    |     |      |      |       |
| ; residue 25 MAL rtp MAL q 0.0 |              |    |     |      |      |       |
| 1514                           | CT1          | 25 | MAL | C1   | 1514 | -0.09 |
| 12.011                         | ; qtot -0.09 |    |     |      |      |       |
| 1515                           | HB           | 25 | MAL | H1A  | 1515 | 0.09  |
| 1.008                          | ; qtot 0     |    |     |      |      |       |
| 1516                           | C            | 25 | MAL | C12  | 1516 | 0.51  |
| 12.011                         | ; qtot 0.51  |    |     |      |      |       |
| 1517                           | 0            | 25 | MAL | 012  | 1517 | -0.51 |
| 15.999                         | ; qtot 0     |    |     |      |      |       |
| 1518                           | NH1          | 25 | MAL | N1   | 1518 | -0.47 |
| 14.007                         | ; qtot -0.47 |    |     |      |      |       |
| 1519                           | H            | 25 | MAL | HN1  | 1519 | 0.31  |
| 1.008                          | ; qtot -0.16 |    |     |      |      |       |
| 1520                           | CT2          | 25 | MAL | C13  | 1520 | -0.02 |
| 12.011                         | ; qtot -0.18 |    |     |      |      |       |
| 1521                           | HB           | 25 | MAL | H13A | 1521 | 0.09  |
| 1.008                          | ; qtot -0.09 |    |     |      |      |       |
| 1522                           | HB           | 25 | MAL | H13B | 1522 | 0.09  |

|        |              |    |     |      |      |       |  |
|--------|--------------|----|-----|------|------|-------|--|
| 1.008  | ; qtot 0     |    |     |      |      |       |  |
| 1523   | CTL2         | 25 | MAL | C14  | 1523 | -0.18 |  |
| 12.011 | ; qtot -0.18 |    |     |      |      |       |  |
| 1524   | HAL2         | 25 | MAL | H14A | 1524 | 0.09  |  |
| 1.008  | ; qtot -0.09 |    |     |      |      |       |  |
| 1525   | HAL2         | 25 | MAL | H14B | 1525 | 0.09  |  |
| 1.008  | ; qtot 0     |    |     |      |      |       |  |
| 1526   | CTL2         | 25 | MAL | C15  | 1526 | -0.1  |  |
| 12.011 | ; qtot -0.1  |    |     |      |      |       |  |
| 1527   | HAL2         | 25 | MAL | H15A | 1527 | 0.25  |  |
| 1.008  | ; qtot 0.15  |    |     |      |      |       |  |
| 1528   | HAL2         | 25 | MAL | H15B | 1528 | 0.25  |  |
| 1.008  | ; qtot 0.4   |    |     |      |      |       |  |
| 1529   | NTL          | 25 | MAL | N2   | 1529 | -0.6  |  |
| 14.007 | ; qtot -0.2  |    |     |      |      |       |  |
| 1530   | CTL5         | 25 | MAL | C16  | 1530 | -0.35 |  |
| 12.011 | ; qtot -0.55 |    |     |      |      |       |  |
| 1531   | HL           | 25 | MAL | H16A | 1531 | 0.25  |  |
| 1.008  | ; qtot -0.3  |    |     |      |      |       |  |
| 1532   | HL           | 25 | MAL | H16B | 1532 | 0.25  |  |
| 1.008  | ; qtot -0.05 |    |     |      |      |       |  |
| 1533   | HL           | 25 | MAL | H16C | 1533 | 0.25  |  |
| 1.008  | ; qtot 0.2   |    |     |      |      |       |  |
| 1534   | CTL5         | 25 | MAL | C17  | 1534 | -0.35 |  |
| 12.011 | ; qtot -0.15 |    |     |      |      |       |  |
| 1535   | HL           | 25 | MAL | H17A | 1535 | 0.25  |  |
| 1.008  | ; qtot 0.1   |    |     |      |      |       |  |
| 1536   | HL           | 25 | MAL | H17B | 1536 | 0.25  |  |
| 1.008  | ; qtot 0.35  |    |     |      |      |       |  |
| 1537   | HL           | 25 | MAL | H17C | 1537 | 0.25  |  |
| 1.008  | ; qtot 0.6   |    |     |      |      |       |  |
| 1538   | CTL5         | 25 | MAL | C18  | 1538 | -0.35 |  |
| 12.011 | ; qtot 0.25  |    |     |      |      |       |  |
| 1539   | HL           | 25 | MAL | H18A | 1539 | 0.25  |  |
| 1.008  | ; qtot 0.5   |    |     |      |      |       |  |
| 1540   | HL           | 25 | MAL | H18B | 1540 | 0.25  |  |
| 1.008  | ; qtot 0.75  |    |     |      |      |       |  |
| 1541   | HL           | 25 | MAL | H18C | 1541 | 0.25  |  |
| 1.008  | ; qtot 1     |    |     |      |      |       |  |
| 1542   | CT1          | 25 | MAL | C2   | 1542 | -0.09 |  |
| 12.011 | ; qtot 0.91  |    |     |      |      |       |  |
| 1543   | HB           | 25 | MAL | H2   | 1543 | 0.09  |  |
| 1.008  | ; qtot 1     |    |     |      |      |       |  |
| 1544   | CC           | 25 | MAL | C21  | 1544 | 0.34  |  |
| 12.011 | ; qtot 1.34  |    |     |      |      |       |  |
| 1545   | OC           | 25 | MAL | O21  | 1545 | -0.67 |  |
| 15.999 | ; qtot 0.67  |    |     |      |      |       |  |
| 1546   | OC           | 25 | MAL | O22  | 1546 | -0.67 |  |
| 15.999 | ; qtot 0     |    |     |      |      |       |  |
| 1547   | CTL2         | 25 | MAL | C3   | 1547 | -0.18 |  |
| 12.011 | ; qtot -0.18 |    |     |      |      |       |  |
| 1548   | HAL2         | 25 | MAL | H3A  | 1548 | 0.09  |  |
| 1.008  | ; qtot -0.09 |    |     |      |      |       |  |
| 1549   | HAL2         | 25 | MAL | H3B  | 1549 | 0.09  |  |

|        |              |    |     |      |      |       |  |
|--------|--------------|----|-----|------|------|-------|--|
| 1.008  | ; qtot 0     |    |     |      |      |       |  |
| 1550   | CTL1         | 25 | MAL | C4   | 1550 | -0.09 |  |
| 12.011 | ; qtot -0.09 |    |     |      |      |       |  |
| 1551   | HAL1         | 25 | MAL | H4A  | 1551 | 0.09  |  |
| 1.008  | ; qtot 0     |    |     |      |      |       |  |
| 1552   | CTL2         | 25 | MAL | C41  | 1552 | -0.18 |  |
| 12.011 | ; qtot -0.18 |    |     |      |      |       |  |
| 1553   | HAL2         | 25 | MAL | H41A | 1553 | 0.09  |  |
| 1.008  | ; qtot -0.09 |    |     |      |      |       |  |
| 1554   | HAL2         | 25 | MAL | H41B | 1554 | 0.09  |  |
| 1.008  | ; qtot 0     |    |     |      |      |       |  |
| 1555   | CTL2         | 25 | MAL | C42  | 1555 | -0.18 |  |
| 12.011 | ; qtot -0.18 |    |     |      |      |       |  |
| 1556   | HAL2         | 25 | MAL | H42A | 1556 | 0.09  |  |
| 1.008  | ; qtot -0.09 |    |     |      |      |       |  |
| 1557   | HAL2         | 25 | MAL | H42B | 1557 | 0.09  |  |
| 1.008  | ; qtot 0     |    |     |      |      |       |  |
| 1558   | CTL2         | 25 | MAL | C43  | 1558 | -0.18 |  |
| 12.011 | ; qtot -0.18 |    |     |      |      |       |  |
| 1559   | HAL2         | 25 | MAL | H43A | 1559 | 0.09  |  |
| 1.008  | ; qtot -0.09 |    |     |      |      |       |  |
| 1560   | HAL2         | 25 | MAL | H43B | 1560 | 0.09  |  |
| 1.008  | ; qtot 0     |    |     |      |      |       |  |
| 1561   | CTL2         | 25 | MAL | C44  | 1561 | -0.18 |  |
| 12.011 | ; qtot -0.18 |    |     |      |      |       |  |
| 1562   | HAL2         | 25 | MAL | H44A | 1562 | 0.09  |  |
| 1.008  | ; qtot -0.09 |    |     |      |      |       |  |
| 1563   | HAL2         | 25 | MAL | H44B | 1563 | 0.09  |  |
| 1.008  | ; qtot 0     |    |     |      |      |       |  |
| 1564   | CTL2         | 25 | MAL | C45  | 1564 | -0.18 |  |
| 12.011 | ; qtot -0.18 |    |     |      |      |       |  |
| 1565   | HAL2         | 25 | MAL | H45A | 1565 | 0.09  |  |
| 1.008  | ; qtot -0.09 |    |     |      |      |       |  |
| 1566   | HAL2         | 25 | MAL | H45B | 1566 | 0.09  |  |
| 1.008  | ; qtot 0     |    |     |      |      |       |  |
| 1567   | CTL2         | 25 | MAL | C46  | 1567 | -0.18 |  |
| 12.011 | ; qtot -0.18 |    |     |      |      |       |  |
| 1568   | HAL2         | 25 | MAL | H46A | 1568 | 0.09  |  |
| 1.008  | ; qtot -0.09 |    |     |      |      |       |  |
| 1569   | HAL2         | 25 | MAL | H46B | 1569 | 0.09  |  |
| 1.008  | ; qtot 0     |    |     |      |      |       |  |
| 1570   | CTL2         | 25 | MAL | C47  | 1570 | -0.18 |  |
| 12.011 | ; qtot -0.18 |    |     |      |      |       |  |
| 1571   | HAL2         | 25 | MAL | H47A | 1571 | 0.09  |  |
| 1.008  | ; qtot -0.09 |    |     |      |      |       |  |
| 1572   | HAL2         | 25 | MAL | H47B | 1572 | 0.09  |  |
| 1.008  | ; qtot 0     |    |     |      |      |       |  |
| 1573   | CTL3         | 25 | MAL | C48  | 1573 | -0.27 |  |
| 12.011 | ; qtot -0.27 |    |     |      |      |       |  |
| 1574   | HAL3         | 25 | MAL | H48A | 1574 | 0.09  |  |
| 1.008  | ; qtot -0.18 |    |     |      |      |       |  |
| 1575   | HAL3         | 25 | MAL | H48B | 1575 | 0.09  |  |
| 1.008  | ; qtot -0.09 |    |     |      |      |       |  |
| 1576   | HAL3         | 25 | MAL | H48C | 1576 | 0.09  |  |

|        |              |    |     |      |      |   |       |
|--------|--------------|----|-----|------|------|---|-------|
| 1.008  | ; qtot 0     |    |     |      |      |   |       |
|        | ; residue    | 26 | MAL | rtp  | MAL  | q | 0.0   |
| 1577   | CT1          | 26 | MAL | C1   | 1577 |   | -0.09 |
| 12.011 | ; qtot -0.09 |    |     |      |      |   |       |
| 1578   | HB           | 26 | MAL | H1A  | 1578 |   | 0.09  |
| 1.008  | ; qtot 0     |    |     |      |      |   |       |
| 1579   | C            | 26 | MAL | C12  | 1579 |   | 0.51  |
| 12.011 | ; qtot 0.51  |    |     |      |      |   |       |
| 1580   | 0            | 26 | MAL | 012  | 1580 |   | -0.51 |
| 15.999 | ; qtot 0     |    |     |      |      |   |       |
| 1581   | NH1          | 26 | MAL | N1   | 1581 |   | -0.47 |
| 14.007 | ; qtot -0.47 |    |     |      |      |   |       |
| 1582   | H            | 26 | MAL | HN1  | 1582 |   | 0.31  |
| 1.008  | ; qtot -0.16 |    |     |      |      |   |       |
| 1583   | CT2          | 26 | MAL | C13  | 1583 |   | -0.02 |
| 12.011 | ; qtot -0.18 |    |     |      |      |   |       |
| 1584   | HB           | 26 | MAL | H13A | 1584 |   | 0.09  |
| 1.008  | ; qtot -0.09 |    |     |      |      |   |       |
| 1585   | HB           | 26 | MAL | H13B | 1585 |   | 0.09  |
| 1.008  | ; qtot 0     |    |     |      |      |   |       |
| 1586   | CTL2         | 26 | MAL | C14  | 1586 |   | -0.18 |
| 12.011 | ; qtot -0.18 |    |     |      |      |   |       |
| 1587   | HAL2         | 26 | MAL | H14A | 1587 |   | 0.09  |
| 1.008  | ; qtot -0.09 |    |     |      |      |   |       |
| 1588   | HAL2         | 26 | MAL | H14B | 1588 |   | 0.09  |
| 1.008  | ; qtot 0     |    |     |      |      |   |       |
| 1589   | CTL2         | 26 | MAL | C15  | 1589 |   | -0.1  |
| 12.011 | ; qtot -0.1  |    |     |      |      |   |       |
| 1590   | HAL2         | 26 | MAL | H15A | 1590 |   | 0.25  |
| 1.008  | ; qtot 0.15  |    |     |      |      |   |       |
| 1591   | HAL2         | 26 | MAL | H15B | 1591 |   | 0.25  |
| 1.008  | ; qtot 0.4   |    |     |      |      |   |       |
| 1592   | NTL          | 26 | MAL | N2   | 1592 |   | -0.6  |
| 14.007 | ; qtot -0.2  |    |     |      |      |   |       |
| 1593   | CTL5         | 26 | MAL | C16  | 1593 |   | -0.35 |
| 12.011 | ; qtot -0.55 |    |     |      |      |   |       |
| 1594   | HL           | 26 | MAL | H16A | 1594 |   | 0.25  |
| 1.008  | ; qtot -0.3  |    |     |      |      |   |       |
| 1595   | HL           | 26 | MAL | H16B | 1595 |   | 0.25  |
| 1.008  | ; qtot -0.05 |    |     |      |      |   |       |
| 1596   | HL           | 26 | MAL | H16C | 1596 |   | 0.25  |
| 1.008  | ; qtot 0.2   |    |     |      |      |   |       |
| 1597   | CTL5         | 26 | MAL | C17  | 1597 |   | -0.35 |
| 12.011 | ; qtot -0.15 |    |     |      |      |   |       |
| 1598   | HL           | 26 | MAL | H17A | 1598 |   | 0.25  |
| 1.008  | ; qtot 0.1   |    |     |      |      |   |       |
| 1599   | HL           | 26 | MAL | H17B | 1599 |   | 0.25  |
| 1.008  | ; qtot 0.35  |    |     |      |      |   |       |
| 1600   | HL           | 26 | MAL | H17C | 1600 |   | 0.25  |
| 1.008  | ; qtot 0.6   |    |     |      |      |   |       |
| 1601   | CTL5         | 26 | MAL | C18  | 1601 |   | -0.35 |
| 12.011 | ; qtot 0.25  |    |     |      |      |   |       |
| 1602   | HL           | 26 | MAL | H18A | 1602 |   | 0.25  |
| 1.008  | ; qtot 0.5   |    |     |      |      |   |       |

|        |              |    |     |      |      |       |
|--------|--------------|----|-----|------|------|-------|
| 1603   | HL           | 26 | MAL | H18B | 1603 | 0.25  |
| 1.008  | ; qtot 0.75  |    |     |      |      |       |
| 1604   | HL           | 26 | MAL | H18C | 1604 | 0.25  |
| 1.008  | ; qtot 1     |    |     |      |      |       |
| 1605   | CT1          | 26 | MAL | C2   | 1605 | -0.09 |
| 12.011 | ; qtot 0.91  |    |     |      |      |       |
| 1606   | HB           | 26 | MAL | H2   | 1606 | 0.09  |
| 1.008  | ; qtot 1     |    |     |      |      |       |
| 1607   | CC           | 26 | MAL | C21  | 1607 | 0.34  |
| 12.011 | ; qtot 1.34  |    |     |      |      |       |
| 1608   | OC           | 26 | MAL | 021  | 1608 | -0.67 |
| 15.999 | ; qtot 0.67  |    |     |      |      |       |
| 1609   | OC           | 26 | MAL | 022  | 1609 | -0.67 |
| 15.999 | ; qtot 0     |    |     |      |      |       |
| 1610   | CTL2         | 26 | MAL | C3   | 1610 | -0.18 |
| 12.011 | ; qtot -0.18 |    |     |      |      |       |
| 1611   | HAL2         | 26 | MAL | H3A  | 1611 | 0.09  |
| 1.008  | ; qtot -0.09 |    |     |      |      |       |
| 1612   | HAL2         | 26 | MAL | H3B  | 1612 | 0.09  |
| 1.008  | ; qtot 0     |    |     |      |      |       |
| 1613   | CTL1         | 26 | MAL | C4   | 1613 | -0.09 |
| 12.011 | ; qtot -0.09 |    |     |      |      |       |
| 1614   | HAL1         | 26 | MAL | H4A  | 1614 | 0.09  |
| 1.008  | ; qtot 0     |    |     |      |      |       |
| 1615   | CTL2         | 26 | MAL | C41  | 1615 | -0.18 |
| 12.011 | ; qtot -0.18 |    |     |      |      |       |
| 1616   | HAL2         | 26 | MAL | H41A | 1616 | 0.09  |
| 1.008  | ; qtot -0.09 |    |     |      |      |       |
| 1617   | HAL2         | 26 | MAL | H41B | 1617 | 0.09  |
| 1.008  | ; qtot 0     |    |     |      |      |       |
| 1618   | CTL2         | 26 | MAL | C42  | 1618 | -0.18 |
| 12.011 | ; qtot -0.18 |    |     |      |      |       |
| 1619   | HAL2         | 26 | MAL | H42A | 1619 | 0.09  |
| 1.008  | ; qtot -0.09 |    |     |      |      |       |
| 1620   | HAL2         | 26 | MAL | H42B | 1620 | 0.09  |
| 1.008  | ; qtot 0     |    |     |      |      |       |
| 1621   | CTL2         | 26 | MAL | C43  | 1621 | -0.18 |
| 12.011 | ; qtot -0.18 |    |     |      |      |       |
| 1622   | HAL2         | 26 | MAL | H43A | 1622 | 0.09  |
| 1.008  | ; qtot -0.09 |    |     |      |      |       |
| 1623   | HAL2         | 26 | MAL | H43B | 1623 | 0.09  |
| 1.008  | ; qtot 0     |    |     |      |      |       |
| 1624   | CTL2         | 26 | MAL | C44  | 1624 | -0.18 |
| 12.011 | ; qtot -0.18 |    |     |      |      |       |
| 1625   | HAL2         | 26 | MAL | H44A | 1625 | 0.09  |
| 1.008  | ; qtot -0.09 |    |     |      |      |       |
| 1626   | HAL2         | 26 | MAL | H44B | 1626 | 0.09  |
| 1.008  | ; qtot 0     |    |     |      |      |       |
| 1627   | CTL2         | 26 | MAL | C45  | 1627 | -0.18 |
| 12.011 | ; qtot -0.18 |    |     |      |      |       |
| 1628   | HAL2         | 26 | MAL | H45A | 1628 | 0.09  |
| 1.008  | ; qtot -0.09 |    |     |      |      |       |
| 1629   | HAL2         | 26 | MAL | H45B | 1629 | 0.09  |
| 1.008  | ; qtot 0     |    |     |      |      |       |

|                          |              |    |     |      |      |       |
|--------------------------|--------------|----|-----|------|------|-------|
| 1630                     | CTL2         | 26 | MAL | C46  | 1630 | -0.18 |
| 12.011                   | ; qtot -0.18 |    |     |      |      |       |
| 1631                     | HAL2         | 26 | MAL | H46A | 1631 | 0.09  |
| 1.008                    | ; qtot -0.09 |    |     |      |      |       |
| 1632                     | HAL2         | 26 | MAL | H46B | 1632 | 0.09  |
| 1.008                    | ; qtot 0     |    |     |      |      |       |
| 1633                     | CTL2         | 26 | MAL | C47  | 1633 | -0.18 |
| 12.011                   | ; qtot -0.18 |    |     |      |      |       |
| 1634                     | HAL2         | 26 | MAL | H47A | 1634 | 0.09  |
| 1.008                    | ; qtot -0.09 |    |     |      |      |       |
| 1635                     | HAL2         | 26 | MAL | H47B | 1635 | 0.09  |
| 1.008                    | ; qtot 0     |    |     |      |      |       |
| 1636                     | CTL3         | 26 | MAL | C48  | 1636 | -0.27 |
| 12.011                   | ; qtot -0.27 |    |     |      |      |       |
| 1637                     | HAL3         | 26 | MAL | H48A | 1637 | 0.09  |
| 1.008                    | ; qtot -0.18 |    |     |      |      |       |
| 1638                     | HAL3         | 26 | MAL | H48B | 1638 | 0.09  |
| 1.008                    | ; qtot -0.09 |    |     |      |      |       |
| 1639                     | HAL3         | 26 | MAL | H48C | 1639 | 0.09  |
| 1.008                    | ; qtot 0     |    |     |      |      |       |
| ; residue 27 MAL rtp MAL |              |    | q   | 0.0  |      |       |
| 1640                     | CT1          | 27 | MAL | C1   | 1640 | -0.09 |
| 12.011                   | ; qtot -0.09 |    |     |      |      |       |
| 1641                     | HB           | 27 | MAL | H1A  | 1641 | 0.09  |
| 1.008                    | ; qtot 0     |    |     |      |      |       |
| 1642                     | C            | 27 | MAL | C12  | 1642 | 0.51  |
| 12.011                   | ; qtot 0.51  |    |     |      |      |       |
| 1643                     | 0            | 27 | MAL | 012  | 1643 | -0.51 |
| 15.999                   | ; qtot 0     |    |     |      |      |       |
| 1644                     | NH1          | 27 | MAL | N1   | 1644 | -0.47 |
| 14.007                   | ; qtot -0.47 |    |     |      |      |       |
| 1645                     | H            | 27 | MAL | HN1  | 1645 | 0.31  |
| 1.008                    | ; qtot -0.16 |    |     |      |      |       |
| 1646                     | CT2          | 27 | MAL | C13  | 1646 | -0.02 |
| 12.011                   | ; qtot -0.18 |    |     |      |      |       |
| 1647                     | HB           | 27 | MAL | H13A | 1647 | 0.09  |
| 1.008                    | ; qtot -0.09 |    |     |      |      |       |
| 1648                     | HB           | 27 | MAL | H13B | 1648 | 0.09  |
| 1.008                    | ; qtot 0     |    |     |      |      |       |
| 1649                     | CTL2         | 27 | MAL | C14  | 1649 | -0.18 |
| 12.011                   | ; qtot -0.18 |    |     |      |      |       |
| 1650                     | HAL2         | 27 | MAL | H14A | 1650 | 0.09  |
| 1.008                    | ; qtot -0.09 |    |     |      |      |       |
| 1651                     | HAL2         | 27 | MAL | H14B | 1651 | 0.09  |
| 1.008                    | ; qtot 0     |    |     |      |      |       |
| 1652                     | CTL2         | 27 | MAL | C15  | 1652 | -0.1  |
| 12.011                   | ; qtot -0.1  |    |     |      |      |       |
| 1653                     | HAL2         | 27 | MAL | H15A | 1653 | 0.25  |
| 1.008                    | ; qtot 0.15  |    |     |      |      |       |
| 1654                     | HAL2         | 27 | MAL | H15B | 1654 | 0.25  |
| 1.008                    | ; qtot 0.4   |    |     |      |      |       |
| 1655                     | NTL          | 27 | MAL | N2   | 1655 | -0.6  |
| 14.007                   | ; qtot -0.2  |    |     |      |      |       |
| 1656                     | CTL5         | 27 | MAL | C16  | 1656 | -0.35 |

|        |              |    |     |      |      |       |  |
|--------|--------------|----|-----|------|------|-------|--|
| 12.011 | ; qtot -0.55 |    |     |      |      |       |  |
| 1657   | HL           | 27 | MAL | H16A | 1657 | 0.25  |  |
| 1.008  | ; qtot -0.3  |    |     |      |      |       |  |
| 1658   | HL           | 27 | MAL | H16B | 1658 | 0.25  |  |
| 1.008  | ; qtot -0.05 |    |     |      |      |       |  |
| 1659   | HL           | 27 | MAL | H16C | 1659 | 0.25  |  |
| 1.008  | ; qtot 0.2   |    |     |      |      |       |  |
| 1660   | CTL5         | 27 | MAL | C17  | 1660 | -0.35 |  |
| 12.011 | ; qtot -0.15 |    |     |      |      |       |  |
| 1661   | HL           | 27 | MAL | H17A | 1661 | 0.25  |  |
| 1.008  | ; qtot 0.1   |    |     |      |      |       |  |
| 1662   | HL           | 27 | MAL | H17B | 1662 | 0.25  |  |
| 1.008  | ; qtot 0.35  |    |     |      |      |       |  |
| 1663   | HL           | 27 | MAL | H17C | 1663 | 0.25  |  |
| 1.008  | ; qtot 0.6   |    |     |      |      |       |  |
| 1664   | CTL5         | 27 | MAL | C18  | 1664 | -0.35 |  |
| 12.011 | ; qtot 0.25  |    |     |      |      |       |  |
| 1665   | HL           | 27 | MAL | H18A | 1665 | 0.25  |  |
| 1.008  | ; qtot 0.5   |    |     |      |      |       |  |
| 1666   | HL           | 27 | MAL | H18B | 1666 | 0.25  |  |
| 1.008  | ; qtot 0.75  |    |     |      |      |       |  |
| 1667   | HL           | 27 | MAL | H18C | 1667 | 0.25  |  |
| 1.008  | ; qtot 1     |    |     |      |      |       |  |
| 1668   | CT1          | 27 | MAL | C2   | 1668 | -0.09 |  |
| 12.011 | ; qtot 0.91  |    |     |      |      |       |  |
| 1669   | HB           | 27 | MAL | H2   | 1669 | 0.09  |  |
| 1.008  | ; qtot 1     |    |     |      |      |       |  |
| 1670   | CC           | 27 | MAL | C21  | 1670 | 0.34  |  |
| 12.011 | ; qtot 1.34  |    |     |      |      |       |  |
| 1671   | OC           | 27 | MAL | O21  | 1671 | -0.67 |  |
| 15.999 | ; qtot 0.67  |    |     |      |      |       |  |
| 1672   | OC           | 27 | MAL | O22  | 1672 | -0.67 |  |
| 15.999 | ; qtot 0     |    |     |      |      |       |  |
| 1673   | CTL2         | 27 | MAL | C3   | 1673 | -0.18 |  |
| 12.011 | ; qtot -0.18 |    |     |      |      |       |  |
| 1674   | HAL2         | 27 | MAL | H3A  | 1674 | 0.09  |  |
| 1.008  | ; qtot -0.09 |    |     |      |      |       |  |
| 1675   | HAL2         | 27 | MAL | H3B  | 1675 | 0.09  |  |
| 1.008  | ; qtot 0     |    |     |      |      |       |  |
| 1676   | CTL1         | 27 | MAL | C4   | 1676 | -0.09 |  |
| 12.011 | ; qtot -0.09 |    |     |      |      |       |  |
| 1677   | HAL1         | 27 | MAL | H4A  | 1677 | 0.09  |  |
| 1.008  | ; qtot 0     |    |     |      |      |       |  |
| 1678   | CTL2         | 27 | MAL | C41  | 1678 | -0.18 |  |
| 12.011 | ; qtot -0.18 |    |     |      |      |       |  |
| 1679   | HAL2         | 27 | MAL | H41A | 1679 | 0.09  |  |
| 1.008  | ; qtot -0.09 |    |     |      |      |       |  |
| 1680   | HAL2         | 27 | MAL | H41B | 1680 | 0.09  |  |
| 1.008  | ; qtot 0     |    |     |      |      |       |  |
| 1681   | CTL2         | 27 | MAL | C42  | 1681 | -0.18 |  |
| 12.011 | ; qtot -0.18 |    |     |      |      |       |  |
| 1682   | HAL2         | 27 | MAL | H42A | 1682 | 0.09  |  |
| 1.008  | ; qtot -0.09 |    |     |      |      |       |  |
| 1683   | HAL2         | 27 | MAL | H42B | 1683 | 0.09  |  |

|           |                      |    |     |      |      |       |  |
|-----------|----------------------|----|-----|------|------|-------|--|
| 1.008     | ; qtot 0             |    |     |      |      |       |  |
| 1684      | CTL2                 | 27 | MAL | C43  | 1684 | -0.18 |  |
| 12.011    | ; qtot -0.18         |    |     |      |      |       |  |
| 1685      | HAL2                 | 27 | MAL | H43A | 1685 | 0.09  |  |
| 1.008     | ; qtot -0.09         |    |     |      |      |       |  |
| 1686      | HAL2                 | 27 | MAL | H43B | 1686 | 0.09  |  |
| 1.008     | ; qtot 0             |    |     |      |      |       |  |
| 1687      | CTL2                 | 27 | MAL | C44  | 1687 | -0.18 |  |
| 12.011    | ; qtot -0.18         |    |     |      |      |       |  |
| 1688      | HAL2                 | 27 | MAL | H44A | 1688 | 0.09  |  |
| 1.008     | ; qtot -0.09         |    |     |      |      |       |  |
| 1689      | HAL2                 | 27 | MAL | H44B | 1689 | 0.09  |  |
| 1.008     | ; qtot 0             |    |     |      |      |       |  |
| 1690      | CTL2                 | 27 | MAL | C45  | 1690 | -0.18 |  |
| 12.011    | ; qtot -0.18         |    |     |      |      |       |  |
| 1691      | HAL2                 | 27 | MAL | H45A | 1691 | 0.09  |  |
| 1.008     | ; qtot -0.09         |    |     |      |      |       |  |
| 1692      | HAL2                 | 27 | MAL | H45B | 1692 | 0.09  |  |
| 1.008     | ; qtot 0             |    |     |      |      |       |  |
| 1693      | CTL2                 | 27 | MAL | C46  | 1693 | -0.18 |  |
| 12.011    | ; qtot -0.18         |    |     |      |      |       |  |
| 1694      | HAL2                 | 27 | MAL | H46A | 1694 | 0.09  |  |
| 1.008     | ; qtot -0.09         |    |     |      |      |       |  |
| 1695      | HAL2                 | 27 | MAL | H46B | 1695 | 0.09  |  |
| 1.008     | ; qtot 0             |    |     |      |      |       |  |
| 1696      | CTL2                 | 27 | MAL | C47  | 1696 | -0.18 |  |
| 12.011    | ; qtot -0.18         |    |     |      |      |       |  |
| 1697      | HAL2                 | 27 | MAL | H47A | 1697 | 0.09  |  |
| 1.008     | ; qtot -0.09         |    |     |      |      |       |  |
| 1698      | HAL2                 | 27 | MAL | H47B | 1698 | 0.09  |  |
| 1.008     | ; qtot 0             |    |     |      |      |       |  |
| 1699      | CTL3                 | 27 | MAL | C48  | 1699 | -0.27 |  |
| 12.011    | ; qtot -0.27         |    |     |      |      |       |  |
| 1700      | HAL3                 | 27 | MAL | H48A | 1700 | 0.09  |  |
| 1.008     | ; qtot -0.18         |    |     |      |      |       |  |
| 1701      | HAL3                 | 27 | MAL | H48B | 1701 | 0.09  |  |
| 1.008     | ; qtot -0.09         |    |     |      |      |       |  |
| 1702      | HAL3                 | 27 | MAL | H48C | 1702 | 0.09  |  |
| 1.008     | ; qtot 0             |    |     |      |      |       |  |
| ; residue | 28 MAL rtp MAL q 0.0 |    |     |      |      |       |  |
| 1703      | CT1                  | 28 | MAL | C1   | 1703 | -0.09 |  |
| 12.011    | ; qtot -0.09         |    |     |      |      |       |  |
| 1704      | HB                   | 28 | MAL | H1A  | 1704 | 0.09  |  |
| 1.008     | ; qtot 0             |    |     |      |      |       |  |
| 1705      | C                    | 28 | MAL | C12  | 1705 | 0.51  |  |
| 12.011    | ; qtot 0.51          |    |     |      |      |       |  |
| 1706      | 0                    | 28 | MAL | 012  | 1706 | -0.51 |  |
| 15.999    | ; qtot 0             |    |     |      |      |       |  |
| 1707      | NH1                  | 28 | MAL | N1   | 1707 | -0.47 |  |
| 14.007    | ; qtot -0.47         |    |     |      |      |       |  |
| 1708      | H                    | 28 | MAL | HN1  | 1708 | 0.31  |  |
| 1.008     | ; qtot -0.16         |    |     |      |      |       |  |
| 1709      | CT2                  | 28 | MAL | C13  | 1709 | -0.02 |  |
| 12.011    | ; qtot -0.18         |    |     |      |      |       |  |



|        |              |    |     |      |      |       |
|--------|--------------|----|-----|------|------|-------|
| 1710   | HB           | 28 | MAL | H13A | 1710 | 0.09  |
| 1.008  | ; qtot -0.09 |    |     |      |      |       |
| 1711   | HB           | 28 | MAL | H13B | 1711 | 0.09  |
| 1.008  | ; qtot 0     |    |     |      |      |       |
| 1712   | CTL2         | 28 | MAL | C14  | 1712 | -0.18 |
| 12.011 | ; qtot -0.18 |    |     |      |      |       |
| 1713   | HAL2         | 28 | MAL | H14A | 1713 | 0.09  |
| 1.008  | ; qtot -0.09 |    |     |      |      |       |
| 1714   | HAL2         | 28 | MAL | H14B | 1714 | 0.09  |
| 1.008  | ; qtot 0     |    |     |      |      |       |
| 1715   | CTL2         | 28 | MAL | C15  | 1715 | -0.1  |
| 12.011 | ; qtot -0.1  |    |     |      |      |       |
| 1716   | HAL2         | 28 | MAL | H15A | 1716 | 0.25  |
| 1.008  | ; qtot 0.15  |    |     |      |      |       |
| 1717   | HAL2         | 28 | MAL | H15B | 1717 | 0.25  |
| 1.008  | ; qtot 0.4   |    |     |      |      |       |
| 1718   | NTL          | 28 | MAL | N2   | 1718 | -0.6  |
| 14.007 | ; qtot -0.2  |    |     |      |      |       |
| 1719   | CTL5         | 28 | MAL | C16  | 1719 | -0.35 |
| 12.011 | ; qtot -0.55 |    |     |      |      |       |
| 1720   | HL           | 28 | MAL | H16A | 1720 | 0.25  |
| 1.008  | ; qtot -0.3  |    |     |      |      |       |
| 1721   | HL           | 28 | MAL | H16B | 1721 | 0.25  |
| 1.008  | ; qtot -0.05 |    |     |      |      |       |
| 1722   | HL           | 28 | MAL | H16C | 1722 | 0.25  |
| 1.008  | ; qtot 0.2   |    |     |      |      |       |
| 1723   | CTL5         | 28 | MAL | C17  | 1723 | -0.35 |
| 12.011 | ; qtot -0.15 |    |     |      |      |       |
| 1724   | HL           | 28 | MAL | H17A | 1724 | 0.25  |
| 1.008  | ; qtot 0.1   |    |     |      |      |       |
| 1725   | HL           | 28 | MAL | H17B | 1725 | 0.25  |
| 1.008  | ; qtot 0.35  |    |     |      |      |       |
| 1726   | HL           | 28 | MAL | H17C | 1726 | 0.25  |
| 1.008  | ; qtot 0.6   |    |     |      |      |       |
| 1727   | CTL5         | 28 | MAL | C18  | 1727 | -0.35 |
| 12.011 | ; qtot 0.25  |    |     |      |      |       |
| 1728   | HL           | 28 | MAL | H18A | 1728 | 0.25  |
| 1.008  | ; qtot 0.5   |    |     |      |      |       |
| 1729   | HL           | 28 | MAL | H18B | 1729 | 0.25  |
| 1.008  | ; qtot 0.75  |    |     |      |      |       |
| 1730   | HL           | 28 | MAL | H18C | 1730 | 0.25  |
| 1.008  | ; qtot 1     |    |     |      |      |       |
| 1731   | CT1          | 28 | MAL | C2   | 1731 | -0.09 |
| 12.011 | ; qtot 0.91  |    |     |      |      |       |
| 1732   | HB           | 28 | MAL | H2   | 1732 | 0.09  |
| 1.008  | ; qtot 1     |    |     |      |      |       |
| 1733   | CC           | 28 | MAL | C21  | 1733 | 0.34  |
| 12.011 | ; qtot 1.34  |    |     |      |      |       |
| 1734   | OC           | 28 | MAL | 021  | 1734 | -0.67 |
| 15.999 | ; qtot 0.67  |    |     |      |      |       |
| 1735   | OC           | 28 | MAL | 022  | 1735 | -0.67 |
| 15.999 | ; qtot 0     |    |     |      |      |       |
| 1736   | CTL2         | 28 | MAL | C3   | 1736 | -0.18 |
| 12.011 | ; qtot -0.18 |    |     |      |      |       |

|        |              |    |     |      |      |       |
|--------|--------------|----|-----|------|------|-------|
| 1737   | HAL2         | 28 | MAL | H3A  | 1737 | 0.09  |
| 1.008  | ; qtot -0.09 |    |     |      |      |       |
| 1738   | HAL2         | 28 | MAL | H3B  | 1738 | 0.09  |
| 1.008  | ; qtot 0     |    |     |      |      |       |
| 1739   | CTL1         | 28 | MAL | C4   | 1739 | -0.09 |
| 12.011 | ; qtot -0.09 |    |     |      |      |       |
| 1740   | HAL1         | 28 | MAL | H4A  | 1740 | 0.09  |
| 1.008  | ; qtot 0     |    |     |      |      |       |
| 1741   | CTL2         | 28 | MAL | C41  | 1741 | -0.18 |
| 12.011 | ; qtot -0.18 |    |     |      |      |       |
| 1742   | HAL2         | 28 | MAL | H41A | 1742 | 0.09  |
| 1.008  | ; qtot -0.09 |    |     |      |      |       |
| 1743   | HAL2         | 28 | MAL | H41B | 1743 | 0.09  |
| 1.008  | ; qtot 0     |    |     |      |      |       |
| 1744   | CTL2         | 28 | MAL | C42  | 1744 | -0.18 |
| 12.011 | ; qtot -0.18 |    |     |      |      |       |
| 1745   | HAL2         | 28 | MAL | H42A | 1745 | 0.09  |
| 1.008  | ; qtot -0.09 |    |     |      |      |       |
| 1746   | HAL2         | 28 | MAL | H42B | 1746 | 0.09  |
| 1.008  | ; qtot 0     |    |     |      |      |       |
| 1747   | CTL2         | 28 | MAL | C43  | 1747 | -0.18 |
| 12.011 | ; qtot -0.18 |    |     |      |      |       |
| 1748   | HAL2         | 28 | MAL | H43A | 1748 | 0.09  |
| 1.008  | ; qtot -0.09 |    |     |      |      |       |
| 1749   | HAL2         | 28 | MAL | H43B | 1749 | 0.09  |
| 1.008  | ; qtot 0     |    |     |      |      |       |
| 1750   | CTL2         | 28 | MAL | C44  | 1750 | -0.18 |
| 12.011 | ; qtot -0.18 |    |     |      |      |       |
| 1751   | HAL2         | 28 | MAL | H44A | 1751 | 0.09  |
| 1.008  | ; qtot -0.09 |    |     |      |      |       |
| 1752   | HAL2         | 28 | MAL | H44B | 1752 | 0.09  |
| 1.008  | ; qtot 0     |    |     |      |      |       |
| 1753   | CTL2         | 28 | MAL | C45  | 1753 | -0.18 |
| 12.011 | ; qtot -0.18 |    |     |      |      |       |
| 1754   | HAL2         | 28 | MAL | H45A | 1754 | 0.09  |
| 1.008  | ; qtot -0.09 |    |     |      |      |       |
| 1755   | HAL2         | 28 | MAL | H45B | 1755 | 0.09  |
| 1.008  | ; qtot 0     |    |     |      |      |       |
| 1756   | CTL2         | 28 | MAL | C46  | 1756 | -0.18 |
| 12.011 | ; qtot -0.18 |    |     |      |      |       |
| 1757   | HAL2         | 28 | MAL | H46A | 1757 | 0.09  |
| 1.008  | ; qtot -0.09 |    |     |      |      |       |
| 1758   | HAL2         | 28 | MAL | H46B | 1758 | 0.09  |
| 1.008  | ; qtot 0     |    |     |      |      |       |
| 1759   | CTL2         | 28 | MAL | C47  | 1759 | -0.18 |
| 12.011 | ; qtot -0.18 |    |     |      |      |       |
| 1760   | HAL2         | 28 | MAL | H47A | 1760 | 0.09  |
| 1.008  | ; qtot -0.09 |    |     |      |      |       |
| 1761   | HAL2         | 28 | MAL | H47B | 1761 | 0.09  |
| 1.008  | ; qtot 0     |    |     |      |      |       |
| 1762   | CTL3         | 28 | MAL | C48  | 1762 | -0.27 |
| 12.011 | ; qtot -0.27 |    |     |      |      |       |
| 1763   | HAL3         | 28 | MAL | H48A | 1763 | 0.09  |
| 1.008  | ; qtot -0.18 |    |     |      |      |       |

|                                |              |    |     |      |      |       |
|--------------------------------|--------------|----|-----|------|------|-------|
| 1764                           | HAL3         | 28 | MAL | H48B | 1764 | 0.09  |
| 1.008                          | ; qtot -0.09 |    |     |      |      |       |
| 1765                           | HAL3         | 28 | MAL | H48C | 1765 | 0.09  |
| 1.008                          | ; qtot 0     |    |     |      |      |       |
| ; residue 29 MAL rtp MAL q 0.0 |              |    |     |      |      |       |
| 1766                           | CT1          | 29 | MAL | C1   | 1766 | -0.09 |
| 12.011                         | ; qtot -0.09 |    |     |      |      |       |
| 1767                           | HB           | 29 | MAL | H1A  | 1767 | 0.09  |
| 1.008                          | ; qtot 0     |    |     |      |      |       |
| 1768                           | C            | 29 | MAL | C12  | 1768 | 0.51  |
| 12.011                         | ; qtot 0.51  |    |     |      |      |       |
| 1769                           | 0            | 29 | MAL | 012  | 1769 | -0.51 |
| 15.999                         | ; qtot 0     |    |     |      |      |       |
| 1770                           | NH1          | 29 | MAL | N1   | 1770 | -0.47 |
| 14.007                         | ; qtot -0.47 |    |     |      |      |       |
| 1771                           | H            | 29 | MAL | HN1  | 1771 | 0.31  |
| 1.008                          | ; qtot -0.16 |    |     |      |      |       |
| 1772                           | CT2          | 29 | MAL | C13  | 1772 | -0.02 |
| 12.011                         | ; qtot -0.18 |    |     |      |      |       |
| 1773                           | HB           | 29 | MAL | H13A | 1773 | 0.09  |
| 1.008                          | ; qtot -0.09 |    |     |      |      |       |
| 1774                           | HB           | 29 | MAL | H13B | 1774 | 0.09  |
| 1.008                          | ; qtot 0     |    |     |      |      |       |
| 1775                           | CTL2         | 29 | MAL | C14  | 1775 | -0.18 |
| 12.011                         | ; qtot -0.18 |    |     |      |      |       |
| 1776                           | HAL2         | 29 | MAL | H14A | 1776 | 0.09  |
| 1.008                          | ; qtot -0.09 |    |     |      |      |       |
| 1777                           | HAL2         | 29 | MAL | H14B | 1777 | 0.09  |
| 1.008                          | ; qtot 0     |    |     |      |      |       |
| 1778                           | CTL2         | 29 | MAL | C15  | 1778 | -0.1  |
| 12.011                         | ; qtot -0.1  |    |     |      |      |       |
| 1779                           | HAL2         | 29 | MAL | H15A | 1779 | 0.25  |
| 1.008                          | ; qtot 0.15  |    |     |      |      |       |
| 1780                           | HAL2         | 29 | MAL | H15B | 1780 | 0.25  |
| 1.008                          | ; qtot 0.4   |    |     |      |      |       |
| 1781                           | NTL          | 29 | MAL | N2   | 1781 | -0.6  |
| 14.007                         | ; qtot -0.2  |    |     |      |      |       |
| 1782                           | CTL5         | 29 | MAL | C16  | 1782 | -0.35 |
| 12.011                         | ; qtot -0.55 |    |     |      |      |       |
| 1783                           | HL           | 29 | MAL | H16A | 1783 | 0.25  |
| 1.008                          | ; qtot -0.3  |    |     |      |      |       |
| 1784                           | HL           | 29 | MAL | H16B | 1784 | 0.25  |
| 1.008                          | ; qtot -0.05 |    |     |      |      |       |
| 1785                           | HL           | 29 | MAL | H16C | 1785 | 0.25  |
| 1.008                          | ; qtot 0.2   |    |     |      |      |       |
| 1786                           | CTL5         | 29 | MAL | C17  | 1786 | -0.35 |
| 12.011                         | ; qtot -0.15 |    |     |      |      |       |
| 1787                           | HL           | 29 | MAL | H17A | 1787 | 0.25  |
| 1.008                          | ; qtot 0.1   |    |     |      |      |       |
| 1788                           | HL           | 29 | MAL | H17B | 1788 | 0.25  |
| 1.008                          | ; qtot 0.35  |    |     |      |      |       |
| 1789                           | HL           | 29 | MAL | H17C | 1789 | 0.25  |
| 1.008                          | ; qtot 0.6   |    |     |      |      |       |
| 1790                           | CTL5         | 29 | MAL | C18  | 1790 | -0.35 |

|        |              |    |     |      |      |       |  |
|--------|--------------|----|-----|------|------|-------|--|
| 12.011 | ; qtot 0.25  |    |     |      |      |       |  |
| 1791   | HL           | 29 | MAL | H18A | 1791 | 0.25  |  |
| 1.008  | ; qtot 0.5   |    |     |      |      |       |  |
| 1792   | HL           | 29 | MAL | H18B | 1792 | 0.25  |  |
| 1.008  | ; qtot 0.75  |    |     |      |      |       |  |
| 1793   | HL           | 29 | MAL | H18C | 1793 | 0.25  |  |
| 1.008  | ; qtot 1     |    |     |      |      |       |  |
| 1794   | CT1          | 29 | MAL | C2   | 1794 | -0.09 |  |
| 12.011 | ; qtot 0.91  |    |     |      |      |       |  |
| 1795   | HB           | 29 | MAL | H2   | 1795 | 0.09  |  |
| 1.008  | ; qtot 1     |    |     |      |      |       |  |
| 1796   | CC           | 29 | MAL | C21  | 1796 | 0.34  |  |
| 12.011 | ; qtot 1.34  |    |     |      |      |       |  |
| 1797   | OC           | 29 | MAL | O21  | 1797 | -0.67 |  |
| 15.999 | ; qtot 0.67  |    |     |      |      |       |  |
| 1798   | OC           | 29 | MAL | O22  | 1798 | -0.67 |  |
| 15.999 | ; qtot 0     |    |     |      |      |       |  |
| 1799   | CTL2         | 29 | MAL | C3   | 1799 | -0.18 |  |
| 12.011 | ; qtot -0.18 |    |     |      |      |       |  |
| 1800   | HAL2         | 29 | MAL | H3A  | 1800 | 0.09  |  |
| 1.008  | ; qtot -0.09 |    |     |      |      |       |  |
| 1801   | HAL2         | 29 | MAL | H3B  | 1801 | 0.09  |  |
| 1.008  | ; qtot 0     |    |     |      |      |       |  |
| 1802   | CTL1         | 29 | MAL | C4   | 1802 | -0.09 |  |
| 12.011 | ; qtot -0.09 |    |     |      |      |       |  |
| 1803   | HAL1         | 29 | MAL | H4A  | 1803 | 0.09  |  |
| 1.008  | ; qtot 0     |    |     |      |      |       |  |
| 1804   | CTL2         | 29 | MAL | C41  | 1804 | -0.18 |  |
| 12.011 | ; qtot -0.18 |    |     |      |      |       |  |
| 1805   | HAL2         | 29 | MAL | H41A | 1805 | 0.09  |  |
| 1.008  | ; qtot -0.09 |    |     |      |      |       |  |
| 1806   | HAL2         | 29 | MAL | H41B | 1806 | 0.09  |  |
| 1.008  | ; qtot 0     |    |     |      |      |       |  |
| 1807   | CTL2         | 29 | MAL | C42  | 1807 | -0.18 |  |
| 12.011 | ; qtot -0.18 |    |     |      |      |       |  |
| 1808   | HAL2         | 29 | MAL | H42A | 1808 | 0.09  |  |
| 1.008  | ; qtot -0.09 |    |     |      |      |       |  |
| 1809   | HAL2         | 29 | MAL | H42B | 1809 | 0.09  |  |
| 1.008  | ; qtot 0     |    |     |      |      |       |  |
| 1810   | CTL2         | 29 | MAL | C43  | 1810 | -0.18 |  |
| 12.011 | ; qtot -0.18 |    |     |      |      |       |  |
| 1811   | HAL2         | 29 | MAL | H43A | 1811 | 0.09  |  |
| 1.008  | ; qtot -0.09 |    |     |      |      |       |  |
| 1812   | HAL2         | 29 | MAL | H43B | 1812 | 0.09  |  |
| 1.008  | ; qtot 0     |    |     |      |      |       |  |
| 1813   | CTL2         | 29 | MAL | C44  | 1813 | -0.18 |  |
| 12.011 | ; qtot -0.18 |    |     |      |      |       |  |
| 1814   | HAL2         | 29 | MAL | H44A | 1814 | 0.09  |  |
| 1.008  | ; qtot -0.09 |    |     |      |      |       |  |
| 1815   | HAL2         | 29 | MAL | H44B | 1815 | 0.09  |  |
| 1.008  | ; qtot 0     |    |     |      |      |       |  |
| 1816   | CTL2         | 29 | MAL | C45  | 1816 | -0.18 |  |
| 12.011 | ; qtot -0.18 |    |     |      |      |       |  |
| 1817   | HAL2         | 29 | MAL | H45A | 1817 | 0.09  |  |

|        |                                |    |     |      |      |       |  |
|--------|--------------------------------|----|-----|------|------|-------|--|
| 1.008  | ; qtot -0.09                   |    |     |      |      |       |  |
| 1818   | HAL2                           | 29 | MAL | H45B | 1818 | 0.09  |  |
| 1.008  | ; qtot 0                       |    |     |      |      |       |  |
| 1819   | CTL2                           | 29 | MAL | C46  | 1819 | -0.18 |  |
| 12.011 | ; qtot -0.18                   |    |     |      |      |       |  |
| 1820   | HAL2                           | 29 | MAL | H46A | 1820 | 0.09  |  |
| 1.008  | ; qtot -0.09                   |    |     |      |      |       |  |
| 1821   | HAL2                           | 29 | MAL | H46B | 1821 | 0.09  |  |
| 1.008  | ; qtot 0                       |    |     |      |      |       |  |
| 1822   | CTL2                           | 29 | MAL | C47  | 1822 | -0.18 |  |
| 12.011 | ; qtot -0.18                   |    |     |      |      |       |  |
| 1823   | HAL2                           | 29 | MAL | H47A | 1823 | 0.09  |  |
| 1.008  | ; qtot -0.09                   |    |     |      |      |       |  |
| 1824   | HAL2                           | 29 | MAL | H47B | 1824 | 0.09  |  |
| 1.008  | ; qtot 0                       |    |     |      |      |       |  |
| 1825   | CTL3                           | 29 | MAL | C48  | 1825 | -0.27 |  |
| 12.011 | ; qtot -0.27                   |    |     |      |      |       |  |
| 1826   | HAL3                           | 29 | MAL | H48A | 1826 | 0.09  |  |
| 1.008  | ; qtot -0.18                   |    |     |      |      |       |  |
| 1827   | HAL3                           | 29 | MAL | H48B | 1827 | 0.09  |  |
| 1.008  | ; qtot -0.09                   |    |     |      |      |       |  |
| 1828   | HAL3                           | 29 | MAL | H48C | 1828 | 0.09  |  |
| 1.008  | ; qtot 0                       |    |     |      |      |       |  |
|        | ; residue 30 MAL rtp MAL q 0.0 |    |     |      |      |       |  |
| 1829   | CT1                            | 30 | MAL | C1   | 1829 | -0.09 |  |
| 12.011 | ; qtot -0.09                   |    |     |      |      |       |  |
| 1830   | HB                             | 30 | MAL | H1A  | 1830 | 0.09  |  |
| 1.008  | ; qtot 0                       |    |     |      |      |       |  |
| 1831   | C                              | 30 | MAL | C12  | 1831 | 0.51  |  |
| 12.011 | ; qtot 0.51                    |    |     |      |      |       |  |
| 1832   | 0                              | 30 | MAL | 012  | 1832 | -0.51 |  |
| 15.999 | ; qtot 0                       |    |     |      |      |       |  |
| 1833   | NH1                            | 30 | MAL | N1   | 1833 | -0.47 |  |
| 14.007 | ; qtot -0.47                   |    |     |      |      |       |  |
| 1834   | H                              | 30 | MAL | HN1  | 1834 | 0.31  |  |
| 1.008  | ; qtot -0.16                   |    |     |      |      |       |  |
| 1835   | CT2                            | 30 | MAL | C13  | 1835 | -0.02 |  |
| 12.011 | ; qtot -0.18                   |    |     |      |      |       |  |
| 1836   | HB                             | 30 | MAL | H13A | 1836 | 0.09  |  |
| 1.008  | ; qtot -0.09                   |    |     |      |      |       |  |
| 1837   | HB                             | 30 | MAL | H13B | 1837 | 0.09  |  |
| 1.008  | ; qtot 0                       |    |     |      |      |       |  |
| 1838   | CTL2                           | 30 | MAL | C14  | 1838 | -0.18 |  |
| 12.011 | ; qtot -0.18                   |    |     |      |      |       |  |
| 1839   | HAL2                           | 30 | MAL | H14A | 1839 | 0.09  |  |
| 1.008  | ; qtot -0.09                   |    |     |      |      |       |  |
| 1840   | HAL2                           | 30 | MAL | H14B | 1840 | 0.09  |  |
| 1.008  | ; qtot 0                       |    |     |      |      |       |  |
| 1841   | CTL2                           | 30 | MAL | C15  | 1841 | -0.1  |  |
| 12.011 | ; qtot -0.1                    |    |     |      |      |       |  |
| 1842   | HAL2                           | 30 | MAL | H15A | 1842 | 0.25  |  |
| 1.008  | ; qtot 0.15                    |    |     |      |      |       |  |
| 1843   | HAL2                           | 30 | MAL | H15B | 1843 | 0.25  |  |
| 1.008  | ; qtot 0.4                     |    |     |      |      |       |  |

|        |              |    |     |      |      |       |
|--------|--------------|----|-----|------|------|-------|
| 1844   | NTL          | 30 | MAL | N2   | 1844 | -0.6  |
| 14.007 | ; qtot -0.2  |    |     |      |      |       |
| 1845   | CTL5         | 30 | MAL | C16  | 1845 | -0.35 |
| 12.011 | ; qtot -0.55 |    |     |      |      |       |
| 1846   | HL           | 30 | MAL | H16A | 1846 | 0.25  |
| 1.008  | ; qtot -0.3  |    |     |      |      |       |
| 1847   | HL           | 30 | MAL | H16B | 1847 | 0.25  |
| 1.008  | ; qtot -0.05 |    |     |      |      |       |
| 1848   | HL           | 30 | MAL | H16C | 1848 | 0.25  |
| 1.008  | ; qtot 0.2   |    |     |      |      |       |
| 1849   | CTL5         | 30 | MAL | C17  | 1849 | -0.35 |
| 12.011 | ; qtot -0.15 |    |     |      |      |       |
| 1850   | HL           | 30 | MAL | H17A | 1850 | 0.25  |
| 1.008  | ; qtot 0.1   |    |     |      |      |       |
| 1851   | HL           | 30 | MAL | H17B | 1851 | 0.25  |
| 1.008  | ; qtot 0.35  |    |     |      |      |       |
| 1852   | HL           | 30 | MAL | H17C | 1852 | 0.25  |
| 1.008  | ; qtot 0.6   |    |     |      |      |       |
| 1853   | CTL5         | 30 | MAL | C18  | 1853 | -0.35 |
| 12.011 | ; qtot 0.25  |    |     |      |      |       |
| 1854   | HL           | 30 | MAL | H18A | 1854 | 0.25  |
| 1.008  | ; qtot 0.5   |    |     |      |      |       |
| 1855   | HL           | 30 | MAL | H18B | 1855 | 0.25  |
| 1.008  | ; qtot 0.75  |    |     |      |      |       |
| 1856   | HL           | 30 | MAL | H18C | 1856 | 0.25  |
| 1.008  | ; qtot 1     |    |     |      |      |       |
| 1857   | CT1          | 30 | MAL | C2   | 1857 | -0.09 |
| 12.011 | ; qtot 0.91  |    |     |      |      |       |
| 1858   | HB           | 30 | MAL | H2   | 1858 | 0.09  |
| 1.008  | ; qtot 1     |    |     |      |      |       |
| 1859   | CC           | 30 | MAL | C21  | 1859 | 0.34  |
| 12.011 | ; qtot 1.34  |    |     |      |      |       |
| 1860   | OC           | 30 | MAL | O21  | 1860 | -0.67 |
| 15.999 | ; qtot 0.67  |    |     |      |      |       |
| 1861   | OC           | 30 | MAL | O22  | 1861 | -0.67 |
| 15.999 | ; qtot 0     |    |     |      |      |       |
| 1862   | CTL2         | 30 | MAL | C3   | 1862 | -0.18 |
| 12.011 | ; qtot -0.18 |    |     |      |      |       |
| 1863   | HAL2         | 30 | MAL | H3A  | 1863 | 0.09  |
| 1.008  | ; qtot -0.09 |    |     |      |      |       |
| 1864   | HAL2         | 30 | MAL | H3B  | 1864 | 0.09  |
| 1.008  | ; qtot 0     |    |     |      |      |       |
| 1865   | CTL1         | 30 | MAL | C4   | 1865 | -0.09 |
| 12.011 | ; qtot -0.09 |    |     |      |      |       |
| 1866   | HAL1         | 30 | MAL | H4A  | 1866 | 0.09  |
| 1.008  | ; qtot 0     |    |     |      |      |       |
| 1867   | CTL2         | 30 | MAL | C41  | 1867 | -0.18 |
| 12.011 | ; qtot -0.18 |    |     |      |      |       |
| 1868   | HAL2         | 30 | MAL | H41A | 1868 | 0.09  |
| 1.008  | ; qtot -0.09 |    |     |      |      |       |
| 1869   | HAL2         | 30 | MAL | H41B | 1869 | 0.09  |
| 1.008  | ; qtot 0     |    |     |      |      |       |
| 1870   | CTL2         | 30 | MAL | C42  | 1870 | -0.18 |
| 12.011 | ; qtot -0.18 |    |     |      |      |       |

|                                |              |    |     |      |      |       |
|--------------------------------|--------------|----|-----|------|------|-------|
| 1871                           | HAL2         | 30 | MAL | H42A | 1871 | 0.09  |
| 1.008                          | ; qtot -0.09 |    |     |      |      |       |
| 1872                           | HAL2         | 30 | MAL | H42B | 1872 | 0.09  |
| 1.008                          | ; qtot 0     |    |     |      |      |       |
| 1873                           | CTL2         | 30 | MAL | C43  | 1873 | -0.18 |
| 12.011                         | ; qtot -0.18 |    |     |      |      |       |
| 1874                           | HAL2         | 30 | MAL | H43A | 1874 | 0.09  |
| 1.008                          | ; qtot -0.09 |    |     |      |      |       |
| 1875                           | HAL2         | 30 | MAL | H43B | 1875 | 0.09  |
| 1.008                          | ; qtot 0     |    |     |      |      |       |
| 1876                           | CTL2         | 30 | MAL | C44  | 1876 | -0.18 |
| 12.011                         | ; qtot -0.18 |    |     |      |      |       |
| 1877                           | HAL2         | 30 | MAL | H44A | 1877 | 0.09  |
| 1.008                          | ; qtot -0.09 |    |     |      |      |       |
| 1878                           | HAL2         | 30 | MAL | H44B | 1878 | 0.09  |
| 1.008                          | ; qtot 0     |    |     |      |      |       |
| 1879                           | CTL2         | 30 | MAL | C45  | 1879 | -0.18 |
| 12.011                         | ; qtot -0.18 |    |     |      |      |       |
| 1880                           | HAL2         | 30 | MAL | H45A | 1880 | 0.09  |
| 1.008                          | ; qtot -0.09 |    |     |      |      |       |
| 1881                           | HAL2         | 30 | MAL | H45B | 1881 | 0.09  |
| 1.008                          | ; qtot 0     |    |     |      |      |       |
| 1882                           | CTL2         | 30 | MAL | C46  | 1882 | -0.18 |
| 12.011                         | ; qtot -0.18 |    |     |      |      |       |
| 1883                           | HAL2         | 30 | MAL | H46A | 1883 | 0.09  |
| 1.008                          | ; qtot -0.09 |    |     |      |      |       |
| 1884                           | HAL2         | 30 | MAL | H46B | 1884 | 0.09  |
| 1.008                          | ; qtot 0     |    |     |      |      |       |
| 1885                           | CTL2         | 30 | MAL | C47  | 1885 | -0.18 |
| 12.011                         | ; qtot -0.18 |    |     |      |      |       |
| 1886                           | HAL2         | 30 | MAL | H47A | 1886 | 0.09  |
| 1.008                          | ; qtot -0.09 |    |     |      |      |       |
| 1887                           | HAL2         | 30 | MAL | H47B | 1887 | 0.09  |
| 1.008                          | ; qtot 0     |    |     |      |      |       |
| 1888                           | CTL3         | 30 | MAL | C48  | 1888 | -0.27 |
| 12.011                         | ; qtot -0.27 |    |     |      |      |       |
| 1889                           | HAL3         | 30 | MAL | H48A | 1889 | 0.09  |
| 1.008                          | ; qtot -0.18 |    |     |      |      |       |
| 1890                           | HAL3         | 30 | MAL | H48B | 1890 | 0.09  |
| 1.008                          | ; qtot -0.09 |    |     |      |      |       |
| 1891                           | HAL3         | 30 | MAL | H48C | 1891 | 0.09  |
| 1.008                          | ; qtot 0     |    |     |      |      |       |
| ; residue 31 MAL rtp MAL q 0.0 |              |    |     |      |      |       |
| 1892                           | CT1          | 31 | MAL | C1   | 1892 | -0.09 |
| 12.011                         | ; qtot -0.09 |    |     |      |      |       |
| 1893                           | HB           | 31 | MAL | H1A  | 1893 | 0.09  |
| 1.008                          | ; qtot 0     |    |     |      |      |       |
| 1894                           | C            | 31 | MAL | C12  | 1894 | 0.51  |
| 12.011                         | ; qtot 0.51  |    |     |      |      |       |
| 1895                           | 0            | 31 | MAL | 012  | 1895 | -0.51 |
| 15.999                         | ; qtot 0     |    |     |      |      |       |
| 1896                           | NH1          | 31 | MAL | N1   | 1896 | -0.47 |
| 14.007                         | ; qtot -0.47 |    |     |      |      |       |
| 1897                           | H            | 31 | MAL | HN1  | 1897 | 0.31  |

|        |              |    |     |      |      |       |  |
|--------|--------------|----|-----|------|------|-------|--|
| 1.008  | ; qtot -0.16 |    |     |      |      |       |  |
| 1898   | CT2          | 31 | MAL | C13  | 1898 | -0.02 |  |
| 12.011 | ; qtot -0.18 |    |     |      |      |       |  |
| 1899   | HB           | 31 | MAL | H13A | 1899 | 0.09  |  |
| 1.008  | ; qtot -0.09 |    |     |      |      |       |  |
| 1900   | HB           | 31 | MAL | H13B | 1900 | 0.09  |  |
| 1.008  | ; qtot 0     |    |     |      |      |       |  |
| 1901   | CTL2         | 31 | MAL | C14  | 1901 | -0.18 |  |
| 12.011 | ; qtot -0.18 |    |     |      |      |       |  |
| 1902   | HAL2         | 31 | MAL | H14A | 1902 | 0.09  |  |
| 1.008  | ; qtot -0.09 |    |     |      |      |       |  |
| 1903   | HAL2         | 31 | MAL | H14B | 1903 | 0.09  |  |
| 1.008  | ; qtot 0     |    |     |      |      |       |  |
| 1904   | CTL2         | 31 | MAL | C15  | 1904 | -0.1  |  |
| 12.011 | ; qtot -0.1  |    |     |      |      |       |  |
| 1905   | HAL2         | 31 | MAL | H15A | 1905 | 0.25  |  |
| 1.008  | ; qtot 0.15  |    |     |      |      |       |  |
| 1906   | HAL2         | 31 | MAL | H15B | 1906 | 0.25  |  |
| 1.008  | ; qtot 0.4   |    |     |      |      |       |  |
| 1907   | NTL          | 31 | MAL | N2   | 1907 | -0.6  |  |
| 14.007 | ; qtot -0.2  |    |     |      |      |       |  |
| 1908   | CTL5         | 31 | MAL | C16  | 1908 | -0.35 |  |
| 12.011 | ; qtot -0.55 |    |     |      |      |       |  |
| 1909   | HL           | 31 | MAL | H16A | 1909 | 0.25  |  |
| 1.008  | ; qtot -0.3  |    |     |      |      |       |  |
| 1910   | HL           | 31 | MAL | H16B | 1910 | 0.25  |  |
| 1.008  | ; qtot -0.05 |    |     |      |      |       |  |
| 1911   | HL           | 31 | MAL | H16C | 1911 | 0.25  |  |
| 1.008  | ; qtot 0.2   |    |     |      |      |       |  |
| 1912   | CTL5         | 31 | MAL | C17  | 1912 | -0.35 |  |
| 12.011 | ; qtot -0.15 |    |     |      |      |       |  |
| 1913   | HL           | 31 | MAL | H17A | 1913 | 0.25  |  |
| 1.008  | ; qtot 0.1   |    |     |      |      |       |  |
| 1914   | HL           | 31 | MAL | H17B | 1914 | 0.25  |  |
| 1.008  | ; qtot 0.35  |    |     |      |      |       |  |
| 1915   | HL           | 31 | MAL | H17C | 1915 | 0.25  |  |
| 1.008  | ; qtot 0.6   |    |     |      |      |       |  |
| 1916   | CTL5         | 31 | MAL | C18  | 1916 | -0.35 |  |
| 12.011 | ; qtot 0.25  |    |     |      |      |       |  |
| 1917   | HL           | 31 | MAL | H18A | 1917 | 0.25  |  |
| 1.008  | ; qtot 0.5   |    |     |      |      |       |  |
| 1918   | HL           | 31 | MAL | H18B | 1918 | 0.25  |  |
| 1.008  | ; qtot 0.75  |    |     |      |      |       |  |
| 1919   | HL           | 31 | MAL | H18C | 1919 | 0.25  |  |
| 1.008  | ; qtot 1     |    |     |      |      |       |  |
| 1920   | CT1          | 31 | MAL | C2   | 1920 | -0.09 |  |
| 12.011 | ; qtot 0.91  |    |     |      |      |       |  |
| 1921   | HB           | 31 | MAL | H2   | 1921 | 0.09  |  |
| 1.008  | ; qtot 1     |    |     |      |      |       |  |
| 1922   | CC           | 31 | MAL | C21  | 1922 | 0.34  |  |
| 12.011 | ; qtot 1.34  |    |     |      |      |       |  |
| 1923   | OC           | 31 | MAL | O21  | 1923 | -0.67 |  |
| 15.999 | ; qtot 0.67  |    |     |      |      |       |  |
| 1924   | OC           | 31 | MAL | O22  | 1924 | -0.67 |  |



|        |              |    |     |      |      |       |  |
|--------|--------------|----|-----|------|------|-------|--|
| 15.999 | ; qtot 0     |    |     |      |      |       |  |
| 1925   | CTL2         | 31 | MAL | C3   | 1925 | -0.18 |  |
| 12.011 | ; qtot -0.18 |    |     |      |      |       |  |
| 1926   | HAL2         | 31 | MAL | H3A  | 1926 | 0.09  |  |
| 1.008  | ; qtot -0.09 |    |     |      |      |       |  |
| 1927   | HAL2         | 31 | MAL | H3B  | 1927 | 0.09  |  |
| 1.008  | ; qtot 0     |    |     |      |      |       |  |
| 1928   | CTL1         | 31 | MAL | C4   | 1928 | -0.09 |  |
| 12.011 | ; qtot -0.09 |    |     |      |      |       |  |
| 1929   | HAL1         | 31 | MAL | H4A  | 1929 | 0.09  |  |
| 1.008  | ; qtot 0     |    |     |      |      |       |  |
| 1930   | CTL2         | 31 | MAL | C41  | 1930 | -0.18 |  |
| 12.011 | ; qtot -0.18 |    |     |      |      |       |  |
| 1931   | HAL2         | 31 | MAL | H41A | 1931 | 0.09  |  |
| 1.008  | ; qtot -0.09 |    |     |      |      |       |  |
| 1932   | HAL2         | 31 | MAL | H41B | 1932 | 0.09  |  |
| 1.008  | ; qtot 0     |    |     |      |      |       |  |
| 1933   | CTL2         | 31 | MAL | C42  | 1933 | -0.18 |  |
| 12.011 | ; qtot -0.18 |    |     |      |      |       |  |
| 1934   | HAL2         | 31 | MAL | H42A | 1934 | 0.09  |  |
| 1.008  | ; qtot -0.09 |    |     |      |      |       |  |
| 1935   | HAL2         | 31 | MAL | H42B | 1935 | 0.09  |  |
| 1.008  | ; qtot 0     |    |     |      |      |       |  |
| 1936   | CTL2         | 31 | MAL | C43  | 1936 | -0.18 |  |
| 12.011 | ; qtot -0.18 |    |     |      |      |       |  |
| 1937   | HAL2         | 31 | MAL | H43A | 1937 | 0.09  |  |
| 1.008  | ; qtot -0.09 |    |     |      |      |       |  |
| 1938   | HAL2         | 31 | MAL | H43B | 1938 | 0.09  |  |
| 1.008  | ; qtot 0     |    |     |      |      |       |  |
| 1939   | CTL2         | 31 | MAL | C44  | 1939 | -0.18 |  |
| 12.011 | ; qtot -0.18 |    |     |      |      |       |  |
| 1940   | HAL2         | 31 | MAL | H44A | 1940 | 0.09  |  |
| 1.008  | ; qtot -0.09 |    |     |      |      |       |  |
| 1941   | HAL2         | 31 | MAL | H44B | 1941 | 0.09  |  |
| 1.008  | ; qtot 0     |    |     |      |      |       |  |
| 1942   | CTL2         | 31 | MAL | C45  | 1942 | -0.18 |  |
| 12.011 | ; qtot -0.18 |    |     |      |      |       |  |
| 1943   | HAL2         | 31 | MAL | H45A | 1943 | 0.09  |  |
| 1.008  | ; qtot -0.09 |    |     |      |      |       |  |
| 1944   | HAL2         | 31 | MAL | H45B | 1944 | 0.09  |  |
| 1.008  | ; qtot 0     |    |     |      |      |       |  |
| 1945   | CTL2         | 31 | MAL | C46  | 1945 | -0.18 |  |
| 12.011 | ; qtot -0.18 |    |     |      |      |       |  |
| 1946   | HAL2         | 31 | MAL | H46A | 1946 | 0.09  |  |
| 1.008  | ; qtot -0.09 |    |     |      |      |       |  |
| 1947   | HAL2         | 31 | MAL | H46B | 1947 | 0.09  |  |
| 1.008  | ; qtot 0     |    |     |      |      |       |  |
| 1948   | CTL2         | 31 | MAL | C47  | 1948 | -0.18 |  |
| 12.011 | ; qtot -0.18 |    |     |      |      |       |  |
| 1949   | HAL2         | 31 | MAL | H47A | 1949 | 0.09  |  |
| 1.008  | ; qtot -0.09 |    |     |      |      |       |  |
| 1950   | HAL2         | 31 | MAL | H47B | 1950 | 0.09  |  |
| 1.008  | ; qtot 0     |    |     |      |      |       |  |
| 1951   | CTL3         | 31 | MAL | C48  | 1951 | -0.27 |  |

|        |                          |    |     |      |      |       |
|--------|--------------------------|----|-----|------|------|-------|
| 12.011 | ; qtot -0.27             |    |     |      |      |       |
| 1952   | HAL3                     | 31 | MAL | H48A | 1952 | 0.09  |
| 1.008  | ; qtot -0.18             |    |     |      |      |       |
| 1953   | HAL3                     | 31 | MAL | H48B | 1953 | 0.09  |
| 1.008  | ; qtot -0.09             |    |     |      |      |       |
| 1954   | HAL3                     | 31 | MAL | H48C | 1954 | 0.09  |
| 1.008  | ; qtot 0                 |    |     |      |      |       |
|        | ; residue 32 MAL rtp MAL |    | q   | 0.0  |      |       |
| 1955   | CT1                      | 32 | MAL | C1   | 1955 | -0.09 |
| 12.011 | ; qtot -0.09             |    |     |      |      |       |
| 1956   | HB                       | 32 | MAL | H1A  | 1956 | 0.09  |
| 1.008  | ; qtot 0                 |    |     |      |      |       |
| 1957   | C                        | 32 | MAL | C12  | 1957 | 0.51  |
| 12.011 | ; qtot 0.51              |    |     |      |      |       |
| 1958   | 0                        | 32 | MAL | 012  | 1958 | -0.51 |
| 15.999 | ; qtot 0                 |    |     |      |      |       |
| 1959   | NH1                      | 32 | MAL | N1   | 1959 | -0.47 |
| 14.007 | ; qtot -0.47             |    |     |      |      |       |
| 1960   | H                        | 32 | MAL | HN1  | 1960 | 0.31  |
| 1.008  | ; qtot -0.16             |    |     |      |      |       |
| 1961   | CT2                      | 32 | MAL | C13  | 1961 | -0.02 |
| 12.011 | ; qtot -0.18             |    |     |      |      |       |
| 1962   | HB                       | 32 | MAL | H13A | 1962 | 0.09  |
| 1.008  | ; qtot -0.09             |    |     |      |      |       |
| 1963   | HB                       | 32 | MAL | H13B | 1963 | 0.09  |
| 1.008  | ; qtot 0                 |    |     |      |      |       |
| 1964   | CTL2                     | 32 | MAL | C14  | 1964 | -0.18 |
| 12.011 | ; qtot -0.18             |    |     |      |      |       |
| 1965   | HAL2                     | 32 | MAL | H14A | 1965 | 0.09  |
| 1.008  | ; qtot -0.09             |    |     |      |      |       |
| 1966   | HAL2                     | 32 | MAL | H14B | 1966 | 0.09  |
| 1.008  | ; qtot 0                 |    |     |      |      |       |
| 1967   | CTL2                     | 32 | MAL | C15  | 1967 | -0.1  |
| 12.011 | ; qtot -0.1              |    |     |      |      |       |
| 1968   | HAL2                     | 32 | MAL | H15A | 1968 | 0.25  |
| 1.008  | ; qtot 0.15              |    |     |      |      |       |
| 1969   | HAL2                     | 32 | MAL | H15B | 1969 | 0.25  |
| 1.008  | ; qtot 0.4               |    |     |      |      |       |
| 1970   | NTL                      | 32 | MAL | N2   | 1970 | -0.6  |
| 14.007 | ; qtot -0.2              |    |     |      |      |       |
| 1971   | CTL5                     | 32 | MAL | C16  | 1971 | -0.35 |
| 12.011 | ; qtot -0.55             |    |     |      |      |       |
| 1972   | HL                       | 32 | MAL | H16A | 1972 | 0.25  |
| 1.008  | ; qtot -0.3              |    |     |      |      |       |
| 1973   | HL                       | 32 | MAL | H16B | 1973 | 0.25  |
| 1.008  | ; qtot -0.05             |    |     |      |      |       |
| 1974   | HL                       | 32 | MAL | H16C | 1974 | 0.25  |
| 1.008  | ; qtot 0.2               |    |     |      |      |       |
| 1975   | CTL5                     | 32 | MAL | C17  | 1975 | -0.35 |
| 12.011 | ; qtot -0.15             |    |     |      |      |       |
| 1976   | HL                       | 32 | MAL | H17A | 1976 | 0.25  |
| 1.008  | ; qtot 0.1               |    |     |      |      |       |
| 1977   | HL                       | 32 | MAL | H17B | 1977 | 0.25  |
| 1.008  | ; qtot 0.35              |    |     |      |      |       |

|        |              |    |     |      |      |       |
|--------|--------------|----|-----|------|------|-------|
| 1978   | HL           | 32 | MAL | H17C | 1978 | 0.25  |
| 1.008  | ; qtot 0.6   |    |     |      |      |       |
| 1979   | CTL5         | 32 | MAL | C18  | 1979 | -0.35 |
| 12.011 | ; qtot 0.25  |    |     |      |      |       |
| 1980   | HL           | 32 | MAL | H18A | 1980 | 0.25  |
| 1.008  | ; qtot 0.5   |    |     |      |      |       |
| 1981   | HL           | 32 | MAL | H18B | 1981 | 0.25  |
| 1.008  | ; qtot 0.75  |    |     |      |      |       |
| 1982   | HL           | 32 | MAL | H18C | 1982 | 0.25  |
| 1.008  | ; qtot 1     |    |     |      |      |       |
| 1983   | CT1          | 32 | MAL | C2   | 1983 | -0.09 |
| 12.011 | ; qtot 0.91  |    |     |      |      |       |
| 1984   | HB           | 32 | MAL | H2   | 1984 | 0.09  |
| 1.008  | ; qtot 1     |    |     |      |      |       |
| 1985   | CC           | 32 | MAL | C21  | 1985 | 0.34  |
| 12.011 | ; qtot 1.34  |    |     |      |      |       |
| 1986   | OC           | 32 | MAL | O21  | 1986 | -0.67 |
| 15.999 | ; qtot 0.67  |    |     |      |      |       |
| 1987   | OC           | 32 | MAL | O22  | 1987 | -0.67 |
| 15.999 | ; qtot 0     |    |     |      |      |       |
| 1988   | CTL2         | 32 | MAL | C3   | 1988 | -0.18 |
| 12.011 | ; qtot -0.18 |    |     |      |      |       |
| 1989   | HAL2         | 32 | MAL | H3A  | 1989 | 0.09  |
| 1.008  | ; qtot -0.09 |    |     |      |      |       |
| 1990   | HAL2         | 32 | MAL | H3B  | 1990 | 0.09  |
| 1.008  | ; qtot 0     |    |     |      |      |       |
| 1991   | CTL1         | 32 | MAL | C4   | 1991 | -0.09 |
| 12.011 | ; qtot -0.09 |    |     |      |      |       |
| 1992   | HAL1         | 32 | MAL | H4A  | 1992 | 0.09  |
| 1.008  | ; qtot 0     |    |     |      |      |       |
| 1993   | CTL2         | 32 | MAL | C41  | 1993 | -0.18 |
| 12.011 | ; qtot -0.18 |    |     |      |      |       |
| 1994   | HAL2         | 32 | MAL | H41A | 1994 | 0.09  |
| 1.008  | ; qtot -0.09 |    |     |      |      |       |
| 1995   | HAL2         | 32 | MAL | H41B | 1995 | 0.09  |
| 1.008  | ; qtot 0     |    |     |      |      |       |
| 1996   | CTL2         | 32 | MAL | C42  | 1996 | -0.18 |
| 12.011 | ; qtot -0.18 |    |     |      |      |       |
| 1997   | HAL2         | 32 | MAL | H42A | 1997 | 0.09  |
| 1.008  | ; qtot -0.09 |    |     |      |      |       |
| 1998   | HAL2         | 32 | MAL | H42B | 1998 | 0.09  |
| 1.008  | ; qtot 0     |    |     |      |      |       |
| 1999   | CTL2         | 32 | MAL | C43  | 1999 | -0.18 |
| 12.011 | ; qtot -0.18 |    |     |      |      |       |
| 2000   | HAL2         | 32 | MAL | H43A | 2000 | 0.09  |
| 1.008  | ; qtot -0.09 |    |     |      |      |       |
| 2001   | HAL2         | 32 | MAL | H43B | 2001 | 0.09  |
| 1.008  | ; qtot 0     |    |     |      |      |       |
| 2002   | CTL2         | 32 | MAL | C44  | 2002 | -0.18 |
| 12.011 | ; qtot -0.18 |    |     |      |      |       |
| 2003   | HAL2         | 32 | MAL | H44A | 2003 | 0.09  |
| 1.008  | ; qtot -0.09 |    |     |      |      |       |
| 2004   | HAL2         | 32 | MAL | H44B | 2004 | 0.09  |
| 1.008  | ; qtot 0     |    |     |      |      |       |

|           |              |     |     |      |      |       |
|-----------|--------------|-----|-----|------|------|-------|
| 2005      | CTL2         | 32  | MAL | C45  | 2005 | -0.18 |
| 12.011    | ; qtot -0.18 |     |     |      |      |       |
| 2006      | HAL2         | 32  | MAL | H45A | 2006 | 0.09  |
| 1.008     | ; qtot -0.09 |     |     |      |      |       |
| 2007      | HAL2         | 32  | MAL | H45B | 2007 | 0.09  |
| 1.008     | ; qtot 0     |     |     |      |      |       |
| 2008      | CTL2         | 32  | MAL | C46  | 2008 | -0.18 |
| 12.011    | ; qtot -0.18 |     |     |      |      |       |
| 2009      | HAL2         | 32  | MAL | H46A | 2009 | 0.09  |
| 1.008     | ; qtot -0.09 |     |     |      |      |       |
| 2010      | HAL2         | 32  | MAL | H46B | 2010 | 0.09  |
| 1.008     | ; qtot 0     |     |     |      |      |       |
| 2011      | CTL2         | 32  | MAL | C47  | 2011 | -0.18 |
| 12.011    | ; qtot -0.18 |     |     |      |      |       |
| 2012      | HAL2         | 32  | MAL | H47A | 2012 | 0.09  |
| 1.008     | ; qtot -0.09 |     |     |      |      |       |
| 2013      | HAL2         | 32  | MAL | H47B | 2013 | 0.09  |
| 1.008     | ; qtot 0     |     |     |      |      |       |
| 2014      | CTL3         | 32  | MAL | C48  | 2014 | -0.27 |
| 12.011    | ; qtot -0.27 |     |     |      |      |       |
| 2015      | HAL3         | 32  | MAL | H48A | 2015 | 0.09  |
| 1.008     | ; qtot -0.18 |     |     |      |      |       |
| 2016      | HAL3         | 32  | MAL | H48B | 2016 | 0.09  |
| 1.008     | ; qtot -0.09 |     |     |      |      |       |
| 2017      | HAL3         | 32  | MAL | H48C | 2017 | 0.09  |
| 1.008     | ; qtot 0     |     |     |      |      |       |
| ; residue | 33 MAL rtp   | MAL | q   | 0.0  |      |       |
| 2018      | CT1          | 33  | MAL | C1   | 2018 | -0.09 |
| 12.011    | ; qtot -0.09 |     |     |      |      |       |
| 2019      | HB           | 33  | MAL | H1A  | 2019 | 0.09  |
| 1.008     | ; qtot 0     |     |     |      |      |       |
| 2020      | C            | 33  | MAL | C12  | 2020 | 0.51  |
| 12.011    | ; qtot 0.51  |     |     |      |      |       |
| 2021      | 0            | 33  | MAL | 012  | 2021 | -0.51 |
| 15.999    | ; qtot 0     |     |     |      |      |       |
| 2022      | NH1          | 33  | MAL | N1   | 2022 | -0.47 |
| 14.007    | ; qtot -0.47 |     |     |      |      |       |
| 2023      | H            | 33  | MAL | HN1  | 2023 | 0.31  |
| 1.008     | ; qtot -0.16 |     |     |      |      |       |
| 2024      | CT2          | 33  | MAL | C13  | 2024 | -0.02 |
| 12.011    | ; qtot -0.18 |     |     |      |      |       |
| 2025      | HB           | 33  | MAL | H13A | 2025 | 0.09  |
| 1.008     | ; qtot -0.09 |     |     |      |      |       |
| 2026      | HB           | 33  | MAL | H13B | 2026 | 0.09  |
| 1.008     | ; qtot 0     |     |     |      |      |       |
| 2027      | CTL2         | 33  | MAL | C14  | 2027 | -0.18 |
| 12.011    | ; qtot -0.18 |     |     |      |      |       |
| 2028      | HAL2         | 33  | MAL | H14A | 2028 | 0.09  |
| 1.008     | ; qtot -0.09 |     |     |      |      |       |
| 2029      | HAL2         | 33  | MAL | H14B | 2029 | 0.09  |
| 1.008     | ; qtot 0     |     |     |      |      |       |
| 2030      | CTL2         | 33  | MAL | C15  | 2030 | -0.1  |
| 12.011    | ; qtot -0.1  |     |     |      |      |       |
| 2031      | HAL2         | 33  | MAL | H15A | 2031 | 0.25  |

|        |              |    |     |      |      |       |  |
|--------|--------------|----|-----|------|------|-------|--|
| 1.008  | ; qtot 0.15  |    |     |      |      |       |  |
| 2032   | HAL2         | 33 | MAL | H15B | 2032 | 0.25  |  |
| 1.008  | ; qtot 0.4   |    |     |      |      |       |  |
| 2033   | NTL          | 33 | MAL | N2   | 2033 | -0.6  |  |
| 14.007 | ; qtot -0.2  |    |     |      |      |       |  |
| 2034   | CTL5         | 33 | MAL | C16  | 2034 | -0.35 |  |
| 12.011 | ; qtot -0.55 |    |     |      |      |       |  |
| 2035   | HL           | 33 | MAL | H16A | 2035 | 0.25  |  |
| 1.008  | ; qtot -0.3  |    |     |      |      |       |  |
| 2036   | HL           | 33 | MAL | H16B | 2036 | 0.25  |  |
| 1.008  | ; qtot -0.05 |    |     |      |      |       |  |
| 2037   | HL           | 33 | MAL | H16C | 2037 | 0.25  |  |
| 1.008  | ; qtot 0.2   |    |     |      |      |       |  |
| 2038   | CTL5         | 33 | MAL | C17  | 2038 | -0.35 |  |
| 12.011 | ; qtot -0.15 |    |     |      |      |       |  |
| 2039   | HL           | 33 | MAL | H17A | 2039 | 0.25  |  |
| 1.008  | ; qtot 0.1   |    |     |      |      |       |  |
| 2040   | HL           | 33 | MAL | H17B | 2040 | 0.25  |  |
| 1.008  | ; qtot 0.35  |    |     |      |      |       |  |
| 2041   | HL           | 33 | MAL | H17C | 2041 | 0.25  |  |
| 1.008  | ; qtot 0.6   |    |     |      |      |       |  |
| 2042   | CTL5         | 33 | MAL | C18  | 2042 | -0.35 |  |
| 12.011 | ; qtot 0.25  |    |     |      |      |       |  |
| 2043   | HL           | 33 | MAL | H18A | 2043 | 0.25  |  |
| 1.008  | ; qtot 0.5   |    |     |      |      |       |  |
| 2044   | HL           | 33 | MAL | H18B | 2044 | 0.25  |  |
| 1.008  | ; qtot 0.75  |    |     |      |      |       |  |
| 2045   | HL           | 33 | MAL | H18C | 2045 | 0.25  |  |
| 1.008  | ; qtot 1     |    |     |      |      |       |  |
| 2046   | CT1          | 33 | MAL | C2   | 2046 | -0.09 |  |
| 12.011 | ; qtot 0.91  |    |     |      |      |       |  |
| 2047   | HB           | 33 | MAL | H2   | 2047 | 0.09  |  |
| 1.008  | ; qtot 1     |    |     |      |      |       |  |
| 2048   | CC           | 33 | MAL | C21  | 2048 | 0.34  |  |
| 12.011 | ; qtot 1.34  |    |     |      |      |       |  |
| 2049   | OC           | 33 | MAL | O21  | 2049 | -0.67 |  |
| 15.999 | ; qtot 0.67  |    |     |      |      |       |  |
| 2050   | OC           | 33 | MAL | O22  | 2050 | -0.67 |  |
| 15.999 | ; qtot 0     |    |     |      |      |       |  |
| 2051   | CTL2         | 33 | MAL | C3   | 2051 | -0.18 |  |
| 12.011 | ; qtot -0.18 |    |     |      |      |       |  |
| 2052   | HAL2         | 33 | MAL | H3A  | 2052 | 0.09  |  |
| 1.008  | ; qtot -0.09 |    |     |      |      |       |  |
| 2053   | HAL2         | 33 | MAL | H3B  | 2053 | 0.09  |  |
| 1.008  | ; qtot 0     |    |     |      |      |       |  |
| 2054   | CTL1         | 33 | MAL | C4   | 2054 | -0.09 |  |
| 12.011 | ; qtot -0.09 |    |     |      |      |       |  |
| 2055   | HAL1         | 33 | MAL | H4A  | 2055 | 0.09  |  |
| 1.008  | ; qtot 0     |    |     |      |      |       |  |
| 2056   | CTL2         | 33 | MAL | C41  | 2056 | -0.18 |  |
| 12.011 | ; qtot -0.18 |    |     |      |      |       |  |
| 2057   | HAL2         | 33 | MAL | H41A | 2057 | 0.09  |  |
| 1.008  | ; qtot -0.09 |    |     |      |      |       |  |
| 2058   | HAL2         | 33 | MAL | H41B | 2058 | 0.09  |  |

|           |              |     |     |      |      |       |  |
|-----------|--------------|-----|-----|------|------|-------|--|
| 1.008     | ; qtot 0     |     |     |      |      |       |  |
| 2059      | CTL2         | 33  | MAL | C42  | 2059 | -0.18 |  |
| 12.011    | ; qtot -0.18 |     |     |      |      |       |  |
| 2060      | HAL2         | 33  | MAL | H42A | 2060 | 0.09  |  |
| 1.008     | ; qtot -0.09 |     |     |      |      |       |  |
| 2061      | HAL2         | 33  | MAL | H42B | 2061 | 0.09  |  |
| 1.008     | ; qtot 0     |     |     |      |      |       |  |
| 2062      | CTL2         | 33  | MAL | C43  | 2062 | -0.18 |  |
| 12.011    | ; qtot -0.18 |     |     |      |      |       |  |
| 2063      | HAL2         | 33  | MAL | H43A | 2063 | 0.09  |  |
| 1.008     | ; qtot -0.09 |     |     |      |      |       |  |
| 2064      | HAL2         | 33  | MAL | H43B | 2064 | 0.09  |  |
| 1.008     | ; qtot 0     |     |     |      |      |       |  |
| 2065      | CTL2         | 33  | MAL | C44  | 2065 | -0.18 |  |
| 12.011    | ; qtot -0.18 |     |     |      |      |       |  |
| 2066      | HAL2         | 33  | MAL | H44A | 2066 | 0.09  |  |
| 1.008     | ; qtot -0.09 |     |     |      |      |       |  |
| 2067      | HAL2         | 33  | MAL | H44B | 2067 | 0.09  |  |
| 1.008     | ; qtot 0     |     |     |      |      |       |  |
| 2068      | CTL2         | 33  | MAL | C45  | 2068 | -0.18 |  |
| 12.011    | ; qtot -0.18 |     |     |      |      |       |  |
| 2069      | HAL2         | 33  | MAL | H45A | 2069 | 0.09  |  |
| 1.008     | ; qtot -0.09 |     |     |      |      |       |  |
| 2070      | HAL2         | 33  | MAL | H45B | 2070 | 0.09  |  |
| 1.008     | ; qtot 0     |     |     |      |      |       |  |
| 2071      | CTL2         | 33  | MAL | C46  | 2071 | -0.18 |  |
| 12.011    | ; qtot -0.18 |     |     |      |      |       |  |
| 2072      | HAL2         | 33  | MAL | H46A | 2072 | 0.09  |  |
| 1.008     | ; qtot -0.09 |     |     |      |      |       |  |
| 2073      | HAL2         | 33  | MAL | H46B | 2073 | 0.09  |  |
| 1.008     | ; qtot 0     |     |     |      |      |       |  |
| 2074      | CTL2         | 33  | MAL | C47  | 2074 | -0.18 |  |
| 12.011    | ; qtot -0.18 |     |     |      |      |       |  |
| 2075      | HAL2         | 33  | MAL | H47A | 2075 | 0.09  |  |
| 1.008     | ; qtot -0.09 |     |     |      |      |       |  |
| 2076      | HAL2         | 33  | MAL | H47B | 2076 | 0.09  |  |
| 1.008     | ; qtot 0     |     |     |      |      |       |  |
| 2077      | CTL3         | 33  | MAL | C48  | 2077 | -0.27 |  |
| 12.011    | ; qtot -0.27 |     |     |      |      |       |  |
| 2078      | HAL3         | 33  | MAL | H48A | 2078 | 0.09  |  |
| 1.008     | ; qtot -0.18 |     |     |      |      |       |  |
| 2079      | HAL3         | 33  | MAL | H48B | 2079 | 0.09  |  |
| 1.008     | ; qtot -0.09 |     |     |      |      |       |  |
| 2080      | HAL3         | 33  | MAL | H48C | 2080 | 0.09  |  |
| 1.008     | ; qtot 0     |     |     |      |      |       |  |
| ; residue | 34 MAL rtp   | MAL | q   | 0.0  |      |       |  |
| 2081      | CT1          | 34  | MAL | C1   | 2081 | -0.09 |  |
| 12.011    | ; qtot -0.09 |     |     |      |      |       |  |
| 2082      | HB           | 34  | MAL | H1A  | 2082 | 0.09  |  |
| 1.008     | ; qtot 0     |     |     |      |      |       |  |
| 2083      | C            | 34  | MAL | C12  | 2083 | 0.51  |  |
| 12.011    | ; qtot 0.51  |     |     |      |      |       |  |
| 2084      | 0            | 34  | MAL | 012  | 2084 | -0.51 |  |
| 15.999    | ; qtot 0     |     |     |      |      |       |  |

|        |              |    |     |      |      |       |
|--------|--------------|----|-----|------|------|-------|
| 2085   | NH1          | 34 | MAL | N1   | 2085 | -0.47 |
| 14.007 | ; qtot -0.47 |    |     |      |      |       |
| 2086   | H            | 34 | MAL | HN1  | 2086 | 0.31  |
| 1.008  | ; qtot -0.16 |    |     |      |      |       |
| 2087   | CT2          | 34 | MAL | C13  | 2087 | -0.02 |
| 12.011 | ; qtot -0.18 |    |     |      |      |       |
| 2088   | HB           | 34 | MAL | H13A | 2088 | 0.09  |
| 1.008  | ; qtot -0.09 |    |     |      |      |       |
| 2089   | HB           | 34 | MAL | H13B | 2089 | 0.09  |
| 1.008  | ; qtot 0     |    |     |      |      |       |
| 2090   | CTL2         | 34 | MAL | C14  | 2090 | -0.18 |
| 12.011 | ; qtot -0.18 |    |     |      |      |       |
| 2091   | HAL2         | 34 | MAL | H14A | 2091 | 0.09  |
| 1.008  | ; qtot -0.09 |    |     |      |      |       |
| 2092   | HAL2         | 34 | MAL | H14B | 2092 | 0.09  |
| 1.008  | ; qtot 0     |    |     |      |      |       |
| 2093   | CTL2         | 34 | MAL | C15  | 2093 | -0.1  |
| 12.011 | ; qtot -0.1  |    |     |      |      |       |
| 2094   | HAL2         | 34 | MAL | H15A | 2094 | 0.25  |
| 1.008  | ; qtot 0.15  |    |     |      |      |       |
| 2095   | HAL2         | 34 | MAL | H15B | 2095 | 0.25  |
| 1.008  | ; qtot 0.4   |    |     |      |      |       |
| 2096   | NTL          | 34 | MAL | N2   | 2096 | -0.6  |
| 14.007 | ; qtot -0.2  |    |     |      |      |       |
| 2097   | CTL5         | 34 | MAL | C16  | 2097 | -0.35 |
| 12.011 | ; qtot -0.55 |    |     |      |      |       |
| 2098   | HL           | 34 | MAL | H16A | 2098 | 0.25  |
| 1.008  | ; qtot -0.3  |    |     |      |      |       |
| 2099   | HL           | 34 | MAL | H16B | 2099 | 0.25  |
| 1.008  | ; qtot -0.05 |    |     |      |      |       |
| 2100   | HL           | 34 | MAL | H16C | 2100 | 0.25  |
| 1.008  | ; qtot 0.2   |    |     |      |      |       |
| 2101   | CTL5         | 34 | MAL | C17  | 2101 | -0.35 |
| 12.011 | ; qtot -0.15 |    |     |      |      |       |
| 2102   | HL           | 34 | MAL | H17A | 2102 | 0.25  |
| 1.008  | ; qtot 0.1   |    |     |      |      |       |
| 2103   | HL           | 34 | MAL | H17B | 2103 | 0.25  |
| 1.008  | ; qtot 0.35  |    |     |      |      |       |
| 2104   | HL           | 34 | MAL | H17C | 2104 | 0.25  |
| 1.008  | ; qtot 0.6   |    |     |      |      |       |
| 2105   | CTL5         | 34 | MAL | C18  | 2105 | -0.35 |
| 12.011 | ; qtot 0.25  |    |     |      |      |       |
| 2106   | HL           | 34 | MAL | H18A | 2106 | 0.25  |
| 1.008  | ; qtot 0.5   |    |     |      |      |       |
| 2107   | HL           | 34 | MAL | H18B | 2107 | 0.25  |
| 1.008  | ; qtot 0.75  |    |     |      |      |       |
| 2108   | HL           | 34 | MAL | H18C | 2108 | 0.25  |
| 1.008  | ; qtot 1     |    |     |      |      |       |
| 2109   | CT1          | 34 | MAL | C2   | 2109 | -0.09 |
| 12.011 | ; qtot 0.91  |    |     |      |      |       |
| 2110   | HB           | 34 | MAL | H2   | 2110 | 0.09  |
| 1.008  | ; qtot 1     |    |     |      |      |       |
| 2111   | CC           | 34 | MAL | C21  | 2111 | 0.34  |
| 12.011 | ; qtot 1.34  |    |     |      |      |       |

|        |              |    |     |      |      |       |
|--------|--------------|----|-----|------|------|-------|
| 2112   | OC           | 34 | MAL | 021  | 2112 | -0.67 |
| 15.999 | ; qtot 0.67  |    |     |      |      |       |
| 2113   | OC           | 34 | MAL | 022  | 2113 | -0.67 |
| 15.999 | ; qtot 0     |    |     |      |      |       |
| 2114   | CTL2         | 34 | MAL | C3   | 2114 | -0.18 |
| 12.011 | ; qtot -0.18 |    |     |      |      |       |
| 2115   | HAL2         | 34 | MAL | H3A  | 2115 | 0.09  |
| 1.008  | ; qtot -0.09 |    |     |      |      |       |
| 2116   | HAL2         | 34 | MAL | H3B  | 2116 | 0.09  |
| 1.008  | ; qtot 0     |    |     |      |      |       |
| 2117   | CTL1         | 34 | MAL | C4   | 2117 | -0.09 |
| 12.011 | ; qtot -0.09 |    |     |      |      |       |
| 2118   | HAL1         | 34 | MAL | H4A  | 2118 | 0.09  |
| 1.008  | ; qtot 0     |    |     |      |      |       |
| 2119   | CTL2         | 34 | MAL | C41  | 2119 | -0.18 |
| 12.011 | ; qtot -0.18 |    |     |      |      |       |
| 2120   | HAL2         | 34 | MAL | H41A | 2120 | 0.09  |
| 1.008  | ; qtot -0.09 |    |     |      |      |       |
| 2121   | HAL2         | 34 | MAL | H41B | 2121 | 0.09  |
| 1.008  | ; qtot 0     |    |     |      |      |       |
| 2122   | CTL2         | 34 | MAL | C42  | 2122 | -0.18 |
| 12.011 | ; qtot -0.18 |    |     |      |      |       |
| 2123   | HAL2         | 34 | MAL | H42A | 2123 | 0.09  |
| 1.008  | ; qtot -0.09 |    |     |      |      |       |
| 2124   | HAL2         | 34 | MAL | H42B | 2124 | 0.09  |
| 1.008  | ; qtot 0     |    |     |      |      |       |
| 2125   | CTL2         | 34 | MAL | C43  | 2125 | -0.18 |
| 12.011 | ; qtot -0.18 |    |     |      |      |       |
| 2126   | HAL2         | 34 | MAL | H43A | 2126 | 0.09  |
| 1.008  | ; qtot -0.09 |    |     |      |      |       |
| 2127   | HAL2         | 34 | MAL | H43B | 2127 | 0.09  |
| 1.008  | ; qtot 0     |    |     |      |      |       |
| 2128   | CTL2         | 34 | MAL | C44  | 2128 | -0.18 |
| 12.011 | ; qtot -0.18 |    |     |      |      |       |
| 2129   | HAL2         | 34 | MAL | H44A | 2129 | 0.09  |
| 1.008  | ; qtot -0.09 |    |     |      |      |       |
| 2130   | HAL2         | 34 | MAL | H44B | 2130 | 0.09  |
| 1.008  | ; qtot 0     |    |     |      |      |       |
| 2131   | CTL2         | 34 | MAL | C45  | 2131 | -0.18 |
| 12.011 | ; qtot -0.18 |    |     |      |      |       |
| 2132   | HAL2         | 34 | MAL | H45A | 2132 | 0.09  |
| 1.008  | ; qtot -0.09 |    |     |      |      |       |
| 2133   | HAL2         | 34 | MAL | H45B | 2133 | 0.09  |
| 1.008  | ; qtot 0     |    |     |      |      |       |
| 2134   | CTL2         | 34 | MAL | C46  | 2134 | -0.18 |
| 12.011 | ; qtot -0.18 |    |     |      |      |       |
| 2135   | HAL2         | 34 | MAL | H46A | 2135 | 0.09  |
| 1.008  | ; qtot -0.09 |    |     |      |      |       |
| 2136   | HAL2         | 34 | MAL | H46B | 2136 | 0.09  |
| 1.008  | ; qtot 0     |    |     |      |      |       |
| 2137   | CTL2         | 34 | MAL | C47  | 2137 | -0.18 |
| 12.011 | ; qtot -0.18 |    |     |      |      |       |
| 2138   | HAL2         | 34 | MAL | H47A | 2138 | 0.09  |
| 1.008  | ; qtot -0.09 |    |     |      |      |       |



|                                |              |    |     |      |      |       |
|--------------------------------|--------------|----|-----|------|------|-------|
| 2139                           | HAL2         | 34 | MAL | H47B | 2139 | 0.09  |
| 1.008                          | ; qtot 0     |    |     |      |      |       |
| 2140                           | CTL3         | 34 | MAL | C48  | 2140 | -0.27 |
| 12.011                         | ; qtot -0.27 |    |     |      |      |       |
| 2141                           | HAL3         | 34 | MAL | H48A | 2141 | 0.09  |
| 1.008                          | ; qtot -0.18 |    |     |      |      |       |
| 2142                           | HAL3         | 34 | MAL | H48B | 2142 | 0.09  |
| 1.008                          | ; qtot -0.09 |    |     |      |      |       |
| 2143                           | HAL3         | 34 | MAL | H48C | 2143 | 0.09  |
| 1.008                          | ; qtot 0     |    |     |      |      |       |
| ; residue 35 MAL rtp MAL q 0.0 |              |    |     |      |      |       |
| 2144                           | CT1          | 35 | MAL | C1   | 2144 | -0.09 |
| 12.011                         | ; qtot -0.09 |    |     |      |      |       |
| 2145                           | HB           | 35 | MAL | H1A  | 2145 | 0.09  |
| 1.008                          | ; qtot 0     |    |     |      |      |       |
| 2146                           | C            | 35 | MAL | C12  | 2146 | 0.51  |
| 12.011                         | ; qtot 0.51  |    |     |      |      |       |
| 2147                           | 0            | 35 | MAL | 012  | 2147 | -0.51 |
| 15.999                         | ; qtot 0     |    |     |      |      |       |
| 2148                           | NH1          | 35 | MAL | N1   | 2148 | -0.47 |
| 14.007                         | ; qtot -0.47 |    |     |      |      |       |
| 2149                           | H            | 35 | MAL | HN1  | 2149 | 0.31  |
| 1.008                          | ; qtot -0.16 |    |     |      |      |       |
| 2150                           | CT2          | 35 | MAL | C13  | 2150 | -0.02 |
| 12.011                         | ; qtot -0.18 |    |     |      |      |       |
| 2151                           | HB           | 35 | MAL | H13A | 2151 | 0.09  |
| 1.008                          | ; qtot -0.09 |    |     |      |      |       |
| 2152                           | HB           | 35 | MAL | H13B | 2152 | 0.09  |
| 1.008                          | ; qtot 0     |    |     |      |      |       |
| 2153                           | CTL2         | 35 | MAL | C14  | 2153 | -0.18 |
| 12.011                         | ; qtot -0.18 |    |     |      |      |       |
| 2154                           | HAL2         | 35 | MAL | H14A | 2154 | 0.09  |
| 1.008                          | ; qtot -0.09 |    |     |      |      |       |
| 2155                           | HAL2         | 35 | MAL | H14B | 2155 | 0.09  |
| 1.008                          | ; qtot 0     |    |     |      |      |       |
| 2156                           | CTL2         | 35 | MAL | C15  | 2156 | -0.1  |
| 12.011                         | ; qtot -0.1  |    |     |      |      |       |
| 2157                           | HAL2         | 35 | MAL | H15A | 2157 | 0.25  |
| 1.008                          | ; qtot 0.15  |    |     |      |      |       |
| 2158                           | HAL2         | 35 | MAL | H15B | 2158 | 0.25  |
| 1.008                          | ; qtot 0.4   |    |     |      |      |       |
| 2159                           | NTL          | 35 | MAL | N2   | 2159 | -0.6  |
| 14.007                         | ; qtot -0.2  |    |     |      |      |       |
| 2160                           | CTL5         | 35 | MAL | C16  | 2160 | -0.35 |
| 12.011                         | ; qtot -0.55 |    |     |      |      |       |
| 2161                           | HL           | 35 | MAL | H16A | 2161 | 0.25  |
| 1.008                          | ; qtot -0.3  |    |     |      |      |       |
| 2162                           | HL           | 35 | MAL | H16B | 2162 | 0.25  |
| 1.008                          | ; qtot -0.05 |    |     |      |      |       |
| 2163                           | HL           | 35 | MAL | H16C | 2163 | 0.25  |
| 1.008                          | ; qtot 0.2   |    |     |      |      |       |
| 2164                           | CTL5         | 35 | MAL | C17  | 2164 | -0.35 |
| 12.011                         | ; qtot -0.15 |    |     |      |      |       |
| 2165                           | HL           | 35 | MAL | H17A | 2165 | 0.25  |

|        |              |    |     |      |      |       |  |
|--------|--------------|----|-----|------|------|-------|--|
| 1.008  | ; qtot 0.1   |    |     |      |      |       |  |
| 2166   | HL           | 35 | MAL | H17B | 2166 | 0.25  |  |
| 1.008  | ; qtot 0.35  |    |     |      |      |       |  |
| 2167   | HL           | 35 | MAL | H17C | 2167 | 0.25  |  |
| 1.008  | ; qtot 0.6   |    |     |      |      |       |  |
| 2168   | CTL5         | 35 | MAL | C18  | 2168 | -0.35 |  |
| 12.011 | ; qtot 0.25  |    |     |      |      |       |  |
| 2169   | HL           | 35 | MAL | H18A | 2169 | 0.25  |  |
| 1.008  | ; qtot 0.5   |    |     |      |      |       |  |
| 2170   | HL           | 35 | MAL | H18B | 2170 | 0.25  |  |
| 1.008  | ; qtot 0.75  |    |     |      |      |       |  |
| 2171   | HL           | 35 | MAL | H18C | 2171 | 0.25  |  |
| 1.008  | ; qtot 1     |    |     |      |      |       |  |
| 2172   | CT1          | 35 | MAL | C2   | 2172 | -0.09 |  |
| 12.011 | ; qtot 0.91  |    |     |      |      |       |  |
| 2173   | HB           | 35 | MAL | H2   | 2173 | 0.09  |  |
| 1.008  | ; qtot 1     |    |     |      |      |       |  |
| 2174   | CC           | 35 | MAL | C21  | 2174 | 0.34  |  |
| 12.011 | ; qtot 1.34  |    |     |      |      |       |  |
| 2175   | OC           | 35 | MAL | 021  | 2175 | -0.67 |  |
| 15.999 | ; qtot 0.67  |    |     |      |      |       |  |
| 2176   | OC           | 35 | MAL | 022  | 2176 | -0.67 |  |
| 15.999 | ; qtot 0     |    |     |      |      |       |  |
| 2177   | CTL2         | 35 | MAL | C3   | 2177 | -0.18 |  |
| 12.011 | ; qtot -0.18 |    |     |      |      |       |  |
| 2178   | HAL2         | 35 | MAL | H3A  | 2178 | 0.09  |  |
| 1.008  | ; qtot -0.09 |    |     |      |      |       |  |
| 2179   | HAL2         | 35 | MAL | H3B  | 2179 | 0.09  |  |
| 1.008  | ; qtot 0     |    |     |      |      |       |  |
| 2180   | CTL1         | 35 | MAL | C4   | 2180 | -0.09 |  |
| 12.011 | ; qtot -0.09 |    |     |      |      |       |  |
| 2181   | HAL1         | 35 | MAL | H4A  | 2181 | 0.09  |  |
| 1.008  | ; qtot 0     |    |     |      |      |       |  |
| 2182   | CTL2         | 35 | MAL | C41  | 2182 | -0.18 |  |
| 12.011 | ; qtot -0.18 |    |     |      |      |       |  |
| 2183   | HAL2         | 35 | MAL | H41A | 2183 | 0.09  |  |
| 1.008  | ; qtot -0.09 |    |     |      |      |       |  |
| 2184   | HAL2         | 35 | MAL | H41B | 2184 | 0.09  |  |
| 1.008  | ; qtot 0     |    |     |      |      |       |  |
| 2185   | CTL2         | 35 | MAL | C42  | 2185 | -0.18 |  |
| 12.011 | ; qtot -0.18 |    |     |      |      |       |  |
| 2186   | HAL2         | 35 | MAL | H42A | 2186 | 0.09  |  |
| 1.008  | ; qtot -0.09 |    |     |      |      |       |  |
| 2187   | HAL2         | 35 | MAL | H42B | 2187 | 0.09  |  |
| 1.008  | ; qtot 0     |    |     |      |      |       |  |
| 2188   | CTL2         | 35 | MAL | C43  | 2188 | -0.18 |  |
| 12.011 | ; qtot -0.18 |    |     |      |      |       |  |
| 2189   | HAL2         | 35 | MAL | H43A | 2189 | 0.09  |  |
| 1.008  | ; qtot -0.09 |    |     |      |      |       |  |
| 2190   | HAL2         | 35 | MAL | H43B | 2190 | 0.09  |  |
| 1.008  | ; qtot 0     |    |     |      |      |       |  |
| 2191   | CTL2         | 35 | MAL | C44  | 2191 | -0.18 |  |
| 12.011 | ; qtot -0.18 |    |     |      |      |       |  |
| 2192   | HAL2         | 35 | MAL | H44A | 2192 | 0.09  |  |

|        |                                |    |     |      |      |       |  |
|--------|--------------------------------|----|-----|------|------|-------|--|
| 1.008  | ; qtot -0.09                   |    |     |      |      |       |  |
| 2193   | HAL2                           | 35 | MAL | H44B | 2193 | 0.09  |  |
| 1.008  | ; qtot 0                       |    |     |      |      |       |  |
| 2194   | CTL2                           | 35 | MAL | C45  | 2194 | -0.18 |  |
| 12.011 | ; qtot -0.18                   |    |     |      |      |       |  |
| 2195   | HAL2                           | 35 | MAL | H45A | 2195 | 0.09  |  |
| 1.008  | ; qtot -0.09                   |    |     |      |      |       |  |
| 2196   | HAL2                           | 35 | MAL | H45B | 2196 | 0.09  |  |
| 1.008  | ; qtot 0                       |    |     |      |      |       |  |
| 2197   | CTL2                           | 35 | MAL | C46  | 2197 | -0.18 |  |
| 12.011 | ; qtot -0.18                   |    |     |      |      |       |  |
| 2198   | HAL2                           | 35 | MAL | H46A | 2198 | 0.09  |  |
| 1.008  | ; qtot -0.09                   |    |     |      |      |       |  |
| 2199   | HAL2                           | 35 | MAL | H46B | 2199 | 0.09  |  |
| 1.008  | ; qtot 0                       |    |     |      |      |       |  |
| 2200   | CTL2                           | 35 | MAL | C47  | 2200 | -0.18 |  |
| 12.011 | ; qtot -0.18                   |    |     |      |      |       |  |
| 2201   | HAL2                           | 35 | MAL | H47A | 2201 | 0.09  |  |
| 1.008  | ; qtot -0.09                   |    |     |      |      |       |  |
| 2202   | HAL2                           | 35 | MAL | H47B | 2202 | 0.09  |  |
| 1.008  | ; qtot 0                       |    |     |      |      |       |  |
| 2203   | CTL3                           | 35 | MAL | C48  | 2203 | -0.27 |  |
| 12.011 | ; qtot -0.27                   |    |     |      |      |       |  |
| 2204   | HAL3                           | 35 | MAL | H48A | 2204 | 0.09  |  |
| 1.008  | ; qtot -0.18                   |    |     |      |      |       |  |
| 2205   | HAL3                           | 35 | MAL | H48B | 2205 | 0.09  |  |
| 1.008  | ; qtot -0.09                   |    |     |      |      |       |  |
| 2206   | HAL3                           | 35 | MAL | H48C | 2206 | 0.09  |  |
| 1.008  | ; qtot 0                       |    |     |      |      |       |  |
|        | ; residue 36 MAL rtp MAL q 0.0 |    |     |      |      |       |  |
| 2207   | CT1                            | 36 | MAL | C1   | 2207 | -0.09 |  |
| 12.011 | ; qtot -0.09                   |    |     |      |      |       |  |
| 2208   | HB                             | 36 | MAL | H1A  | 2208 | 0.09  |  |
| 1.008  | ; qtot 0                       |    |     |      |      |       |  |
| 2209   | C                              | 36 | MAL | C12  | 2209 | 0.51  |  |
| 12.011 | ; qtot 0.51                    |    |     |      |      |       |  |
| 2210   | 0                              | 36 | MAL | 012  | 2210 | -0.51 |  |
| 15.999 | ; qtot 0                       |    |     |      |      |       |  |
| 2211   | NH1                            | 36 | MAL | N1   | 2211 | -0.47 |  |
| 14.007 | ; qtot -0.47                   |    |     |      |      |       |  |
| 2212   | H                              | 36 | MAL | HN1  | 2212 | 0.31  |  |
| 1.008  | ; qtot -0.16                   |    |     |      |      |       |  |
| 2213   | CT2                            | 36 | MAL | C13  | 2213 | -0.02 |  |
| 12.011 | ; qtot -0.18                   |    |     |      |      |       |  |
| 2214   | HB                             | 36 | MAL | H13A | 2214 | 0.09  |  |
| 1.008  | ; qtot -0.09                   |    |     |      |      |       |  |
| 2215   | HB                             | 36 | MAL | H13B | 2215 | 0.09  |  |
| 1.008  | ; qtot 0                       |    |     |      |      |       |  |
| 2216   | CTL2                           | 36 | MAL | C14  | 2216 | -0.18 |  |
| 12.011 | ; qtot -0.18                   |    |     |      |      |       |  |
| 2217   | HAL2                           | 36 | MAL | H14A | 2217 | 0.09  |  |
| 1.008  | ; qtot -0.09                   |    |     |      |      |       |  |
| 2218   | HAL2                           | 36 | MAL | H14B | 2218 | 0.09  |  |
| 1.008  | ; qtot 0                       |    |     |      |      |       |  |

|        |              |    |     |      |      |       |
|--------|--------------|----|-----|------|------|-------|
| 2219   | CTL2         | 36 | MAL | C15  | 2219 | -0.1  |
| 12.011 | ; qtot -0.1  |    |     |      |      |       |
| 2220   | HAL2         | 36 | MAL | H15A | 2220 | 0.25  |
| 1.008  | ; qtot 0.15  |    |     |      |      |       |
| 2221   | HAL2         | 36 | MAL | H15B | 2221 | 0.25  |
| 1.008  | ; qtot 0.4   |    |     |      |      |       |
| 2222   | NTL          | 36 | MAL | N2   | 2222 | -0.6  |
| 14.007 | ; qtot -0.2  |    |     |      |      |       |
| 2223   | CTL5         | 36 | MAL | C16  | 2223 | -0.35 |
| 12.011 | ; qtot -0.55 |    |     |      |      |       |
| 2224   | HL           | 36 | MAL | H16A | 2224 | 0.25  |
| 1.008  | ; qtot -0.3  |    |     |      |      |       |
| 2225   | HL           | 36 | MAL | H16B | 2225 | 0.25  |
| 1.008  | ; qtot -0.05 |    |     |      |      |       |
| 2226   | HL           | 36 | MAL | H16C | 2226 | 0.25  |
| 1.008  | ; qtot 0.2   |    |     |      |      |       |
| 2227   | CTL5         | 36 | MAL | C17  | 2227 | -0.35 |
| 12.011 | ; qtot -0.15 |    |     |      |      |       |
| 2228   | HL           | 36 | MAL | H17A | 2228 | 0.25  |
| 1.008  | ; qtot 0.1   |    |     |      |      |       |
| 2229   | HL           | 36 | MAL | H17B | 2229 | 0.25  |
| 1.008  | ; qtot 0.35  |    |     |      |      |       |
| 2230   | HL           | 36 | MAL | H17C | 2230 | 0.25  |
| 1.008  | ; qtot 0.6   |    |     |      |      |       |
| 2231   | CTL5         | 36 | MAL | C18  | 2231 | -0.35 |
| 12.011 | ; qtot 0.25  |    |     |      |      |       |
| 2232   | HL           | 36 | MAL | H18A | 2232 | 0.25  |
| 1.008  | ; qtot 0.5   |    |     |      |      |       |
| 2233   | HL           | 36 | MAL | H18B | 2233 | 0.25  |
| 1.008  | ; qtot 0.75  |    |     |      |      |       |
| 2234   | HL           | 36 | MAL | H18C | 2234 | 0.25  |
| 1.008  | ; qtot 1     |    |     |      |      |       |
| 2235   | CT1          | 36 | MAL | C2   | 2235 | -0.09 |
| 12.011 | ; qtot 0.91  |    |     |      |      |       |
| 2236   | HB           | 36 | MAL | H2   | 2236 | 0.09  |
| 1.008  | ; qtot 1     |    |     |      |      |       |
| 2237   | CC           | 36 | MAL | C21  | 2237 | 0.34  |
| 12.011 | ; qtot 1.34  |    |     |      |      |       |
| 2238   | OC           | 36 | MAL | O21  | 2238 | -0.67 |
| 15.999 | ; qtot 0.67  |    |     |      |      |       |
| 2239   | OC           | 36 | MAL | O22  | 2239 | -0.67 |
| 15.999 | ; qtot 0     |    |     |      |      |       |
| 2240   | CTL2         | 36 | MAL | C3   | 2240 | -0.18 |
| 12.011 | ; qtot -0.18 |    |     |      |      |       |
| 2241   | HAL2         | 36 | MAL | H3A  | 2241 | 0.09  |
| 1.008  | ; qtot -0.09 |    |     |      |      |       |
| 2242   | HAL2         | 36 | MAL | H3B  | 2242 | 0.09  |
| 1.008  | ; qtot 0     |    |     |      |      |       |
| 2243   | CTL1         | 36 | MAL | C4   | 2243 | -0.09 |
| 12.011 | ; qtot -0.09 |    |     |      |      |       |
| 2244   | HAL1         | 36 | MAL | H4A  | 2244 | 0.09  |
| 1.008  | ; qtot 0     |    |     |      |      |       |
| 2245   | CTL2         | 36 | MAL | C41  | 2245 | -0.18 |
| 12.011 | ; qtot -0.18 |    |     |      |      |       |

|                                |              |    |     |      |      |       |
|--------------------------------|--------------|----|-----|------|------|-------|
| 2246                           | HAL2         | 36 | MAL | H41A | 2246 | 0.09  |
| 1.008                          | ; qtot -0.09 |    |     |      |      |       |
| 2247                           | HAL2         | 36 | MAL | H41B | 2247 | 0.09  |
| 1.008                          | ; qtot 0     |    |     |      |      |       |
| 2248                           | CTL2         | 36 | MAL | C42  | 2248 | -0.18 |
| 12.011                         | ; qtot -0.18 |    |     |      |      |       |
| 2249                           | HAL2         | 36 | MAL | H42A | 2249 | 0.09  |
| 1.008                          | ; qtot -0.09 |    |     |      |      |       |
| 2250                           | HAL2         | 36 | MAL | H42B | 2250 | 0.09  |
| 1.008                          | ; qtot 0     |    |     |      |      |       |
| 2251                           | CTL2         | 36 | MAL | C43  | 2251 | -0.18 |
| 12.011                         | ; qtot -0.18 |    |     |      |      |       |
| 2252                           | HAL2         | 36 | MAL | H43A | 2252 | 0.09  |
| 1.008                          | ; qtot -0.09 |    |     |      |      |       |
| 2253                           | HAL2         | 36 | MAL | H43B | 2253 | 0.09  |
| 1.008                          | ; qtot 0     |    |     |      |      |       |
| 2254                           | CTL2         | 36 | MAL | C44  | 2254 | -0.18 |
| 12.011                         | ; qtot -0.18 |    |     |      |      |       |
| 2255                           | HAL2         | 36 | MAL | H44A | 2255 | 0.09  |
| 1.008                          | ; qtot -0.09 |    |     |      |      |       |
| 2256                           | HAL2         | 36 | MAL | H44B | 2256 | 0.09  |
| 1.008                          | ; qtot 0     |    |     |      |      |       |
| 2257                           | CTL2         | 36 | MAL | C45  | 2257 | -0.18 |
| 12.011                         | ; qtot -0.18 |    |     |      |      |       |
| 2258                           | HAL2         | 36 | MAL | H45A | 2258 | 0.09  |
| 1.008                          | ; qtot -0.09 |    |     |      |      |       |
| 2259                           | HAL2         | 36 | MAL | H45B | 2259 | 0.09  |
| 1.008                          | ; qtot 0     |    |     |      |      |       |
| 2260                           | CTL2         | 36 | MAL | C46  | 2260 | -0.18 |
| 12.011                         | ; qtot -0.18 |    |     |      |      |       |
| 2261                           | HAL2         | 36 | MAL | H46A | 2261 | 0.09  |
| 1.008                          | ; qtot -0.09 |    |     |      |      |       |
| 2262                           | HAL2         | 36 | MAL | H46B | 2262 | 0.09  |
| 1.008                          | ; qtot 0     |    |     |      |      |       |
| 2263                           | CTL2         | 36 | MAL | C47  | 2263 | -0.18 |
| 12.011                         | ; qtot -0.18 |    |     |      |      |       |
| 2264                           | HAL2         | 36 | MAL | H47A | 2264 | 0.09  |
| 1.008                          | ; qtot -0.09 |    |     |      |      |       |
| 2265                           | HAL2         | 36 | MAL | H47B | 2265 | 0.09  |
| 1.008                          | ; qtot 0     |    |     |      |      |       |
| 2266                           | CTL3         | 36 | MAL | C48  | 2266 | -0.27 |
| 12.011                         | ; qtot -0.27 |    |     |      |      |       |
| 2267                           | HAL3         | 36 | MAL | H48A | 2267 | 0.09  |
| 1.008                          | ; qtot -0.18 |    |     |      |      |       |
| 2268                           | HAL3         | 36 | MAL | H48B | 2268 | 0.09  |
| 1.008                          | ; qtot -0.09 |    |     |      |      |       |
| 2269                           | HAL3         | 36 | MAL | H48C | 2269 | 0.09  |
| 1.008                          | ; qtot 0     |    |     |      |      |       |
| ; residue 37 MAL rtp MAL q 0.0 |              |    |     |      |      |       |
| 2270                           | CT1          | 37 | MAL | C1   | 2270 | -0.09 |
| 12.011                         | ; qtot -0.09 |    |     |      |      |       |
| 2271                           | HB           | 37 | MAL | H1A  | 2271 | 0.09  |
| 1.008                          | ; qtot 0     |    |     |      |      |       |
| 2272                           | C            | 37 | MAL | C12  | 2272 | 0.51  |

|        |              |    |     |      |      |       |
|--------|--------------|----|-----|------|------|-------|
| 12.011 | ; qtot 0.51  |    |     |      |      |       |
| 2273   | 0            | 37 | MAL | 012  | 2273 | -0.51 |
| 15.999 | ; qtot 0     |    |     |      |      |       |
| 2274   | NH1          | 37 | MAL | N1   | 2274 | -0.47 |
| 14.007 | ; qtot -0.47 |    |     |      |      |       |
| 2275   | H            | 37 | MAL | HN1  | 2275 | 0.31  |
| 1.008  | ; qtot -0.16 |    |     |      |      |       |
| 2276   | CT2          | 37 | MAL | C13  | 2276 | -0.02 |
| 12.011 | ; qtot -0.18 |    |     |      |      |       |
| 2277   | HB           | 37 | MAL | H13A | 2277 | 0.09  |
| 1.008  | ; qtot -0.09 |    |     |      |      |       |
| 2278   | HB           | 37 | MAL | H13B | 2278 | 0.09  |
| 1.008  | ; qtot 0     |    |     |      |      |       |
| 2279   | CTL2         | 37 | MAL | C14  | 2279 | -0.18 |
| 12.011 | ; qtot -0.18 |    |     |      |      |       |
| 2280   | HAL2         | 37 | MAL | H14A | 2280 | 0.09  |
| 1.008  | ; qtot -0.09 |    |     |      |      |       |
| 2281   | HAL2         | 37 | MAL | H14B | 2281 | 0.09  |
| 1.008  | ; qtot 0     |    |     |      |      |       |
| 2282   | CTL2         | 37 | MAL | C15  | 2282 | -0.1  |
| 12.011 | ; qtot -0.1  |    |     |      |      |       |
| 2283   | HAL2         | 37 | MAL | H15A | 2283 | 0.25  |
| 1.008  | ; qtot 0.15  |    |     |      |      |       |
| 2284   | HAL2         | 37 | MAL | H15B | 2284 | 0.25  |
| 1.008  | ; qtot 0.4   |    |     |      |      |       |
| 2285   | NTL          | 37 | MAL | N2   | 2285 | -0.6  |
| 14.007 | ; qtot -0.2  |    |     |      |      |       |
| 2286   | CTL5         | 37 | MAL | C16  | 2286 | -0.35 |
| 12.011 | ; qtot -0.55 |    |     |      |      |       |
| 2287   | HL           | 37 | MAL | H16A | 2287 | 0.25  |
| 1.008  | ; qtot -0.3  |    |     |      |      |       |
| 2288   | HL           | 37 | MAL | H16B | 2288 | 0.25  |
| 1.008  | ; qtot -0.05 |    |     |      |      |       |
| 2289   | HL           | 37 | MAL | H16C | 2289 | 0.25  |
| 1.008  | ; qtot 0.2   |    |     |      |      |       |
| 2290   | CTL5         | 37 | MAL | C17  | 2290 | -0.35 |
| 12.011 | ; qtot -0.15 |    |     |      |      |       |
| 2291   | HL           | 37 | MAL | H17A | 2291 | 0.25  |
| 1.008  | ; qtot 0.1   |    |     |      |      |       |
| 2292   | HL           | 37 | MAL | H17B | 2292 | 0.25  |
| 1.008  | ; qtot 0.35  |    |     |      |      |       |
| 2293   | HL           | 37 | MAL | H17C | 2293 | 0.25  |
| 1.008  | ; qtot 0.6   |    |     |      |      |       |
| 2294   | CTL5         | 37 | MAL | C18  | 2294 | -0.35 |
| 12.011 | ; qtot 0.25  |    |     |      |      |       |
| 2295   | HL           | 37 | MAL | H18A | 2295 | 0.25  |
| 1.008  | ; qtot 0.5   |    |     |      |      |       |
| 2296   | HL           | 37 | MAL | H18B | 2296 | 0.25  |
| 1.008  | ; qtot 0.75  |    |     |      |      |       |
| 2297   | HL           | 37 | MAL | H18C | 2297 | 0.25  |
| 1.008  | ; qtot 1     |    |     |      |      |       |
| 2298   | CT1          | 37 | MAL | C2   | 2298 | -0.09 |
| 12.011 | ; qtot 0.91  |    |     |      |      |       |
| 2299   | HB           | 37 | MAL | H2   | 2299 | 0.09  |

|        |              |    |     |      |      |       |
|--------|--------------|----|-----|------|------|-------|
| 1.008  | ; qtot 1     |    |     |      |      |       |
| 2300   | CC           | 37 | MAL | C21  | 2300 | 0.34  |
| 12.011 | ; qtot 1.34  |    |     |      |      |       |
| 2301   | OC           | 37 | MAL | 021  | 2301 | -0.67 |
| 15.999 | ; qtot 0.67  |    |     |      |      |       |
| 2302   | OC           | 37 | MAL | 022  | 2302 | -0.67 |
| 15.999 | ; qtot 0     |    |     |      |      |       |
| 2303   | CTL2         | 37 | MAL | C3   | 2303 | -0.18 |
| 12.011 | ; qtot -0.18 |    |     |      |      |       |
| 2304   | HAL2         | 37 | MAL | H3A  | 2304 | 0.09  |
| 1.008  | ; qtot -0.09 |    |     |      |      |       |
| 2305   | HAL2         | 37 | MAL | H3B  | 2305 | 0.09  |
| 1.008  | ; qtot 0     |    |     |      |      |       |
| 2306   | CTL1         | 37 | MAL | C4   | 2306 | -0.09 |
| 12.011 | ; qtot -0.09 |    |     |      |      |       |
| 2307   | HAL1         | 37 | MAL | H4A  | 2307 | 0.09  |
| 1.008  | ; qtot 0     |    |     |      |      |       |
| 2308   | CTL2         | 37 | MAL | C41  | 2308 | -0.18 |
| 12.011 | ; qtot -0.18 |    |     |      |      |       |
| 2309   | HAL2         | 37 | MAL | H41A | 2309 | 0.09  |
| 1.008  | ; qtot -0.09 |    |     |      |      |       |
| 2310   | HAL2         | 37 | MAL | H41B | 2310 | 0.09  |
| 1.008  | ; qtot 0     |    |     |      |      |       |
| 2311   | CTL2         | 37 | MAL | C42  | 2311 | -0.18 |
| 12.011 | ; qtot -0.18 |    |     |      |      |       |
| 2312   | HAL2         | 37 | MAL | H42A | 2312 | 0.09  |
| 1.008  | ; qtot -0.09 |    |     |      |      |       |
| 2313   | HAL2         | 37 | MAL | H42B | 2313 | 0.09  |
| 1.008  | ; qtot 0     |    |     |      |      |       |
| 2314   | CTL2         | 37 | MAL | C43  | 2314 | -0.18 |
| 12.011 | ; qtot -0.18 |    |     |      |      |       |
| 2315   | HAL2         | 37 | MAL | H43A | 2315 | 0.09  |
| 1.008  | ; qtot -0.09 |    |     |      |      |       |
| 2316   | HAL2         | 37 | MAL | H43B | 2316 | 0.09  |
| 1.008  | ; qtot 0     |    |     |      |      |       |
| 2317   | CTL2         | 37 | MAL | C44  | 2317 | -0.18 |
| 12.011 | ; qtot -0.18 |    |     |      |      |       |
| 2318   | HAL2         | 37 | MAL | H44A | 2318 | 0.09  |
| 1.008  | ; qtot -0.09 |    |     |      |      |       |
| 2319   | HAL2         | 37 | MAL | H44B | 2319 | 0.09  |
| 1.008  | ; qtot 0     |    |     |      |      |       |
| 2320   | CTL2         | 37 | MAL | C45  | 2320 | -0.18 |
| 12.011 | ; qtot -0.18 |    |     |      |      |       |
| 2321   | HAL2         | 37 | MAL | H45A | 2321 | 0.09  |
| 1.008  | ; qtot -0.09 |    |     |      |      |       |
| 2322   | HAL2         | 37 | MAL | H45B | 2322 | 0.09  |
| 1.008  | ; qtot 0     |    |     |      |      |       |
| 2323   | CTL2         | 37 | MAL | C46  | 2323 | -0.18 |
| 12.011 | ; qtot -0.18 |    |     |      |      |       |
| 2324   | HAL2         | 37 | MAL | H46A | 2324 | 0.09  |
| 1.008  | ; qtot -0.09 |    |     |      |      |       |
| 2325   | HAL2         | 37 | MAL | H46B | 2325 | 0.09  |
| 1.008  | ; qtot 0     |    |     |      |      |       |
| 2326   | CTL2         | 37 | MAL | C47  | 2326 | -0.18 |

|        |                          |    |     |      |      |       |  |
|--------|--------------------------|----|-----|------|------|-------|--|
| 12.011 | ; qtot -0.18             |    |     |      |      |       |  |
| 2327   | HAL2                     | 37 | MAL | H47A | 2327 | 0.09  |  |
| 1.008  | ; qtot -0.09             |    |     |      |      |       |  |
| 2328   | HAL2                     | 37 | MAL | H47B | 2328 | 0.09  |  |
| 1.008  | ; qtot 0                 |    |     |      |      |       |  |
| 2329   | CTL3                     | 37 | MAL | C48  | 2329 | -0.27 |  |
| 12.011 | ; qtot -0.27             |    |     |      |      |       |  |
| 2330   | HAL3                     | 37 | MAL | H48A | 2330 | 0.09  |  |
| 1.008  | ; qtot -0.18             |    |     |      |      |       |  |
| 2331   | HAL3                     | 37 | MAL | H48B | 2331 | 0.09  |  |
| 1.008  | ; qtot -0.09             |    |     |      |      |       |  |
| 2332   | HAL3                     | 37 | MAL | H48C | 2332 | 0.09  |  |
| 1.008  | ; qtot 0                 |    |     |      |      |       |  |
|        | ; residue 38 MAL rtp MAL |    | q   | 0.0  |      |       |  |
| 2333   | CT1                      | 38 | MAL | C1   | 2333 | -0.09 |  |
| 12.011 | ; qtot -0.09             |    |     |      |      |       |  |
| 2334   | HB                       | 38 | MAL | H1A  | 2334 | 0.09  |  |
| 1.008  | ; qtot 0                 |    |     |      |      |       |  |
| 2335   | C                        | 38 | MAL | C12  | 2335 | 0.51  |  |
| 12.011 | ; qtot 0.51              |    |     |      |      |       |  |
| 2336   | 0                        | 38 | MAL | 012  | 2336 | -0.51 |  |
| 15.999 | ; qtot 0                 |    |     |      |      |       |  |
| 2337   | NH1                      | 38 | MAL | N1   | 2337 | -0.47 |  |
| 14.007 | ; qtot -0.47             |    |     |      |      |       |  |
| 2338   | H                        | 38 | MAL | HN1  | 2338 | 0.31  |  |
| 1.008  | ; qtot -0.16             |    |     |      |      |       |  |
| 2339   | CT2                      | 38 | MAL | C13  | 2339 | -0.02 |  |
| 12.011 | ; qtot -0.18             |    |     |      |      |       |  |
| 2340   | HB                       | 38 | MAL | H13A | 2340 | 0.09  |  |
| 1.008  | ; qtot -0.09             |    |     |      |      |       |  |
| 2341   | HB                       | 38 | MAL | H13B | 2341 | 0.09  |  |
| 1.008  | ; qtot 0                 |    |     |      |      |       |  |
| 2342   | CTL2                     | 38 | MAL | C14  | 2342 | -0.18 |  |
| 12.011 | ; qtot -0.18             |    |     |      |      |       |  |
| 2343   | HAL2                     | 38 | MAL | H14A | 2343 | 0.09  |  |
| 1.008  | ; qtot -0.09             |    |     |      |      |       |  |
| 2344   | HAL2                     | 38 | MAL | H14B | 2344 | 0.09  |  |
| 1.008  | ; qtot 0                 |    |     |      |      |       |  |
| 2345   | CTL2                     | 38 | MAL | C15  | 2345 | -0.1  |  |
| 12.011 | ; qtot -0.1              |    |     |      |      |       |  |
| 2346   | HAL2                     | 38 | MAL | H15A | 2346 | 0.25  |  |
| 1.008  | ; qtot 0.15              |    |     |      |      |       |  |
| 2347   | HAL2                     | 38 | MAL | H15B | 2347 | 0.25  |  |
| 1.008  | ; qtot 0.4               |    |     |      |      |       |  |
| 2348   | NTL                      | 38 | MAL | N2   | 2348 | -0.6  |  |
| 14.007 | ; qtot -0.2              |    |     |      |      |       |  |
| 2349   | CTL5                     | 38 | MAL | C16  | 2349 | -0.35 |  |
| 12.011 | ; qtot -0.55             |    |     |      |      |       |  |
| 2350   | HL                       | 38 | MAL | H16A | 2350 | 0.25  |  |
| 1.008  | ; qtot -0.3              |    |     |      |      |       |  |
| 2351   | HL                       | 38 | MAL | H16B | 2351 | 0.25  |  |
| 1.008  | ; qtot -0.05             |    |     |      |      |       |  |
| 2352   | HL                       | 38 | MAL | H16C | 2352 | 0.25  |  |
| 1.008  | ; qtot 0.2               |    |     |      |      |       |  |



|        |              |    |     |      |      |       |
|--------|--------------|----|-----|------|------|-------|
| 2353   | CTL5         | 38 | MAL | C17  | 2353 | -0.35 |
| 12.011 | ; qtot -0.15 |    |     |      |      |       |
| 2354   | HL           | 38 | MAL | H17A | 2354 | 0.25  |
| 1.008  | ; qtot 0.1   |    |     |      |      |       |
| 2355   | HL           | 38 | MAL | H17B | 2355 | 0.25  |
| 1.008  | ; qtot 0.35  |    |     |      |      |       |
| 2356   | HL           | 38 | MAL | H17C | 2356 | 0.25  |
| 1.008  | ; qtot 0.6   |    |     |      |      |       |
| 2357   | CTL5         | 38 | MAL | C18  | 2357 | -0.35 |
| 12.011 | ; qtot 0.25  |    |     |      |      |       |
| 2358   | HL           | 38 | MAL | H18A | 2358 | 0.25  |
| 1.008  | ; qtot 0.5   |    |     |      |      |       |
| 2359   | HL           | 38 | MAL | H18B | 2359 | 0.25  |
| 1.008  | ; qtot 0.75  |    |     |      |      |       |
| 2360   | HL           | 38 | MAL | H18C | 2360 | 0.25  |
| 1.008  | ; qtot 1     |    |     |      |      |       |
| 2361   | CT1          | 38 | MAL | C2   | 2361 | -0.09 |
| 12.011 | ; qtot 0.91  |    |     |      |      |       |
| 2362   | HB           | 38 | MAL | H2   | 2362 | 0.09  |
| 1.008  | ; qtot 1     |    |     |      |      |       |
| 2363   | CC           | 38 | MAL | C21  | 2363 | 0.34  |
| 12.011 | ; qtot 1.34  |    |     |      |      |       |
| 2364   | OC           | 38 | MAL | O21  | 2364 | -0.67 |
| 15.999 | ; qtot 0.67  |    |     |      |      |       |
| 2365   | OC           | 38 | MAL | O22  | 2365 | -0.67 |
| 15.999 | ; qtot 0     |    |     |      |      |       |
| 2366   | CTL2         | 38 | MAL | C3   | 2366 | -0.18 |
| 12.011 | ; qtot -0.18 |    |     |      |      |       |
| 2367   | HAL2         | 38 | MAL | H3A  | 2367 | 0.09  |
| 1.008  | ; qtot -0.09 |    |     |      |      |       |
| 2368   | HAL2         | 38 | MAL | H3B  | 2368 | 0.09  |
| 1.008  | ; qtot 0     |    |     |      |      |       |
| 2369   | CTL1         | 38 | MAL | C4   | 2369 | -0.09 |
| 12.011 | ; qtot -0.09 |    |     |      |      |       |
| 2370   | HAL1         | 38 | MAL | H4A  | 2370 | 0.09  |
| 1.008  | ; qtot 0     |    |     |      |      |       |
| 2371   | CTL2         | 38 | MAL | C41  | 2371 | -0.18 |
| 12.011 | ; qtot -0.18 |    |     |      |      |       |
| 2372   | HAL2         | 38 | MAL | H41A | 2372 | 0.09  |
| 1.008  | ; qtot -0.09 |    |     |      |      |       |
| 2373   | HAL2         | 38 | MAL | H41B | 2373 | 0.09  |
| 1.008  | ; qtot 0     |    |     |      |      |       |
| 2374   | CTL2         | 38 | MAL | C42  | 2374 | -0.18 |
| 12.011 | ; qtot -0.18 |    |     |      |      |       |
| 2375   | HAL2         | 38 | MAL | H42A | 2375 | 0.09  |
| 1.008  | ; qtot -0.09 |    |     |      |      |       |
| 2376   | HAL2         | 38 | MAL | H42B | 2376 | 0.09  |
| 1.008  | ; qtot 0     |    |     |      |      |       |
| 2377   | CTL2         | 38 | MAL | C43  | 2377 | -0.18 |
| 12.011 | ; qtot -0.18 |    |     |      |      |       |
| 2378   | HAL2         | 38 | MAL | H43A | 2378 | 0.09  |
| 1.008  | ; qtot -0.09 |    |     |      |      |       |
| 2379   | HAL2         | 38 | MAL | H43B | 2379 | 0.09  |
| 1.008  | ; qtot 0     |    |     |      |      |       |

|        |                                |    |     |      |      |       |
|--------|--------------------------------|----|-----|------|------|-------|
| 2380   | CTL2                           | 38 | MAL | C44  | 2380 | -0.18 |
| 12.011 | ; qtot -0.18                   |    |     |      |      |       |
| 2381   | HAL2                           | 38 | MAL | H44A | 2381 | 0.09  |
| 1.008  | ; qtot -0.09                   |    |     |      |      |       |
| 2382   | HAL2                           | 38 | MAL | H44B | 2382 | 0.09  |
| 1.008  | ; qtot 0                       |    |     |      |      |       |
| 2383   | CTL2                           | 38 | MAL | C45  | 2383 | -0.18 |
| 12.011 | ; qtot -0.18                   |    |     |      |      |       |
| 2384   | HAL2                           | 38 | MAL | H45A | 2384 | 0.09  |
| 1.008  | ; qtot -0.09                   |    |     |      |      |       |
| 2385   | HAL2                           | 38 | MAL | H45B | 2385 | 0.09  |
| 1.008  | ; qtot 0                       |    |     |      |      |       |
| 2386   | CTL2                           | 38 | MAL | C46  | 2386 | -0.18 |
| 12.011 | ; qtot -0.18                   |    |     |      |      |       |
| 2387   | HAL2                           | 38 | MAL | H46A | 2387 | 0.09  |
| 1.008  | ; qtot -0.09                   |    |     |      |      |       |
| 2388   | HAL2                           | 38 | MAL | H46B | 2388 | 0.09  |
| 1.008  | ; qtot 0                       |    |     |      |      |       |
| 2389   | CTL2                           | 38 | MAL | C47  | 2389 | -0.18 |
| 12.011 | ; qtot -0.18                   |    |     |      |      |       |
| 2390   | HAL2                           | 38 | MAL | H47A | 2390 | 0.09  |
| 1.008  | ; qtot -0.09                   |    |     |      |      |       |
| 2391   | HAL2                           | 38 | MAL | H47B | 2391 | 0.09  |
| 1.008  | ; qtot 0                       |    |     |      |      |       |
| 2392   | CTL3                           | 38 | MAL | C48  | 2392 | -0.27 |
| 12.011 | ; qtot -0.27                   |    |     |      |      |       |
| 2393   | HAL3                           | 38 | MAL | H48A | 2393 | 0.09  |
| 1.008  | ; qtot -0.18                   |    |     |      |      |       |
| 2394   | HAL3                           | 38 | MAL | H48B | 2394 | 0.09  |
| 1.008  | ; qtot -0.09                   |    |     |      |      |       |
| 2395   | HAL3                           | 38 | MAL | H48C | 2395 | 0.09  |
| 1.008  | ; qtot 0                       |    |     |      |      |       |
|        | ; residue 39 MAL rtp MAL q 0.0 |    |     |      |      |       |
| 2396   | CT1                            | 39 | MAL | C1   | 2396 | -0.09 |
| 12.011 | ; qtot -0.09                   |    |     |      |      |       |
| 2397   | HB                             | 39 | MAL | H1A  | 2397 | 0.09  |
| 1.008  | ; qtot 0                       |    |     |      |      |       |
| 2398   | C                              | 39 | MAL | C12  | 2398 | 0.51  |
| 12.011 | ; qtot 0.51                    |    |     |      |      |       |
| 2399   | 0                              | 39 | MAL | 012  | 2399 | -0.51 |
| 15.999 | ; qtot 0                       |    |     |      |      |       |
| 2400   | NH1                            | 39 | MAL | N1   | 2400 | -0.47 |
| 14.007 | ; qtot -0.47                   |    |     |      |      |       |
| 2401   | H                              | 39 | MAL | HN1  | 2401 | 0.31  |
| 1.008  | ; qtot -0.16                   |    |     |      |      |       |
| 2402   | CT2                            | 39 | MAL | C13  | 2402 | -0.02 |
| 12.011 | ; qtot -0.18                   |    |     |      |      |       |
| 2403   | HB                             | 39 | MAL | H13A | 2403 | 0.09  |
| 1.008  | ; qtot -0.09                   |    |     |      |      |       |
| 2404   | HB                             | 39 | MAL | H13B | 2404 | 0.09  |
| 1.008  | ; qtot 0                       |    |     |      |      |       |
| 2405   | CTL2                           | 39 | MAL | C14  | 2405 | -0.18 |
| 12.011 | ; qtot -0.18                   |    |     |      |      |       |
| 2406   | HAL2                           | 39 | MAL | H14A | 2406 | 0.09  |

|        |              |    |     |      |      |       |  |
|--------|--------------|----|-----|------|------|-------|--|
| 1.008  | ; qtot -0.09 |    |     |      |      |       |  |
| 2407   | HAL2         | 39 | MAL | H14B | 2407 | 0.09  |  |
| 1.008  | ; qtot 0     |    |     |      |      |       |  |
| 2408   | CTL2         | 39 | MAL | C15  | 2408 | -0.1  |  |
| 12.011 | ; qtot -0.1  |    |     |      |      |       |  |
| 2409   | HAL2         | 39 | MAL | H15A | 2409 | 0.25  |  |
| 1.008  | ; qtot 0.15  |    |     |      |      |       |  |
| 2410   | HAL2         | 39 | MAL | H15B | 2410 | 0.25  |  |
| 1.008  | ; qtot 0.4   |    |     |      |      |       |  |
| 2411   | N2           | 39 | MAL | N2   | 2411 | -0.6  |  |
| 14.007 | ; qtot -0.2  |    |     |      |      |       |  |
| 2412   | CTL5         | 39 | MAL | C16  | 2412 | -0.35 |  |
| 12.011 | ; qtot -0.55 |    |     |      |      |       |  |
| 2413   | HL           | 39 | MAL | H16A | 2413 | 0.25  |  |
| 1.008  | ; qtot -0.3  |    |     |      |      |       |  |
| 2414   | HL           | 39 | MAL | H16B | 2414 | 0.25  |  |
| 1.008  | ; qtot -0.05 |    |     |      |      |       |  |
| 2415   | HL           | 39 | MAL | H16C | 2415 | 0.25  |  |
| 1.008  | ; qtot 0.2   |    |     |      |      |       |  |
| 2416   | CTL5         | 39 | MAL | C17  | 2416 | -0.35 |  |
| 12.011 | ; qtot -0.15 |    |     |      |      |       |  |
| 2417   | HL           | 39 | MAL | H17A | 2417 | 0.25  |  |
| 1.008  | ; qtot 0.1   |    |     |      |      |       |  |
| 2418   | HL           | 39 | MAL | H17B | 2418 | 0.25  |  |
| 1.008  | ; qtot 0.35  |    |     |      |      |       |  |
| 2419   | HL           | 39 | MAL | H17C | 2419 | 0.25  |  |
| 1.008  | ; qtot 0.6   |    |     |      |      |       |  |
| 2420   | CTL5         | 39 | MAL | C18  | 2420 | -0.35 |  |
| 12.011 | ; qtot 0.25  |    |     |      |      |       |  |
| 2421   | HL           | 39 | MAL | H18A | 2421 | 0.25  |  |
| 1.008  | ; qtot 0.5   |    |     |      |      |       |  |
| 2422   | HL           | 39 | MAL | H18B | 2422 | 0.25  |  |
| 1.008  | ; qtot 0.75  |    |     |      |      |       |  |
| 2423   | HL           | 39 | MAL | H18C | 2423 | 0.25  |  |
| 1.008  | ; qtot 1     |    |     |      |      |       |  |
| 2424   | CT1          | 39 | MAL | C2   | 2424 | -0.09 |  |
| 12.011 | ; qtot 0.91  |    |     |      |      |       |  |
| 2425   | HB           | 39 | MAL | H2   | 2425 | 0.09  |  |
| 1.008  | ; qtot 1     |    |     |      |      |       |  |
| 2426   | CC           | 39 | MAL | C21  | 2426 | 0.34  |  |
| 12.011 | ; qtot 1.34  |    |     |      |      |       |  |
| 2427   | OC           | 39 | MAL | O21  | 2427 | -0.67 |  |
| 15.999 | ; qtot 0.67  |    |     |      |      |       |  |
| 2428   | OC           | 39 | MAL | O22  | 2428 | -0.67 |  |
| 15.999 | ; qtot 0     |    |     |      |      |       |  |
| 2429   | CTL2         | 39 | MAL | C3   | 2429 | -0.18 |  |
| 12.011 | ; qtot -0.18 |    |     |      |      |       |  |
| 2430   | HAL2         | 39 | MAL | H3A  | 2430 | 0.09  |  |
| 1.008  | ; qtot -0.09 |    |     |      |      |       |  |
| 2431   | HAL2         | 39 | MAL | H3B  | 2431 | 0.09  |  |
| 1.008  | ; qtot 0     |    |     |      |      |       |  |
| 2432   | CTL1         | 39 | MAL | C4   | 2432 | -0.09 |  |
| 12.011 | ; qtot -0.09 |    |     |      |      |       |  |
| 2433   | HAL1         | 39 | MAL | H4A  | 2433 | 0.09  |  |

|           |              |     |     |      |      |       |  |
|-----------|--------------|-----|-----|------|------|-------|--|
| 1.008     | ; qtot 0     |     |     |      |      |       |  |
| 2434      | CTL2         | 39  | MAL | C41  | 2434 | -0.18 |  |
| 12.011    | ; qtot -0.18 |     |     |      |      |       |  |
| 2435      | HAL2         | 39  | MAL | H41A | 2435 | 0.09  |  |
| 1.008     | ; qtot -0.09 |     |     |      |      |       |  |
| 2436      | HAL2         | 39  | MAL | H41B | 2436 | 0.09  |  |
| 1.008     | ; qtot 0     |     |     |      |      |       |  |
| 2437      | CTL2         | 39  | MAL | C42  | 2437 | -0.18 |  |
| 12.011    | ; qtot -0.18 |     |     |      |      |       |  |
| 2438      | HAL2         | 39  | MAL | H42A | 2438 | 0.09  |  |
| 1.008     | ; qtot -0.09 |     |     |      |      |       |  |
| 2439      | HAL2         | 39  | MAL | H42B | 2439 | 0.09  |  |
| 1.008     | ; qtot 0     |     |     |      |      |       |  |
| 2440      | CTL2         | 39  | MAL | C43  | 2440 | -0.18 |  |
| 12.011    | ; qtot -0.18 |     |     |      |      |       |  |
| 2441      | HAL2         | 39  | MAL | H43A | 2441 | 0.09  |  |
| 1.008     | ; qtot -0.09 |     |     |      |      |       |  |
| 2442      | HAL2         | 39  | MAL | H43B | 2442 | 0.09  |  |
| 1.008     | ; qtot 0     |     |     |      |      |       |  |
| 2443      | CTL2         | 39  | MAL | C44  | 2443 | -0.18 |  |
| 12.011    | ; qtot -0.18 |     |     |      |      |       |  |
| 2444      | HAL2         | 39  | MAL | H44A | 2444 | 0.09  |  |
| 1.008     | ; qtot -0.09 |     |     |      |      |       |  |
| 2445      | HAL2         | 39  | MAL | H44B | 2445 | 0.09  |  |
| 1.008     | ; qtot 0     |     |     |      |      |       |  |
| 2446      | CTL2         | 39  | MAL | C45  | 2446 | -0.18 |  |
| 12.011    | ; qtot -0.18 |     |     |      |      |       |  |
| 2447      | HAL2         | 39  | MAL | H45A | 2447 | 0.09  |  |
| 1.008     | ; qtot -0.09 |     |     |      |      |       |  |
| 2448      | HAL2         | 39  | MAL | H45B | 2448 | 0.09  |  |
| 1.008     | ; qtot 0     |     |     |      |      |       |  |
| 2449      | CTL2         | 39  | MAL | C46  | 2449 | -0.18 |  |
| 12.011    | ; qtot -0.18 |     |     |      |      |       |  |
| 2450      | HAL2         | 39  | MAL | H46A | 2450 | 0.09  |  |
| 1.008     | ; qtot -0.09 |     |     |      |      |       |  |
| 2451      | HAL2         | 39  | MAL | H46B | 2451 | 0.09  |  |
| 1.008     | ; qtot 0     |     |     |      |      |       |  |
| 2452      | CTL2         | 39  | MAL | C47  | 2452 | -0.18 |  |
| 12.011    | ; qtot -0.18 |     |     |      |      |       |  |
| 2453      | HAL2         | 39  | MAL | H47A | 2453 | 0.09  |  |
| 1.008     | ; qtot -0.09 |     |     |      |      |       |  |
| 2454      | HAL2         | 39  | MAL | H47B | 2454 | 0.09  |  |
| 1.008     | ; qtot 0     |     |     |      |      |       |  |
| 2455      | CTL3         | 39  | MAL | C48  | 2455 | -0.27 |  |
| 12.011    | ; qtot -0.27 |     |     |      |      |       |  |
| 2456      | HAL3         | 39  | MAL | H48A | 2456 | 0.09  |  |
| 1.008     | ; qtot -0.18 |     |     |      |      |       |  |
| 2457      | HAL3         | 39  | MAL | H48B | 2457 | 0.09  |  |
| 1.008     | ; qtot -0.09 |     |     |      |      |       |  |
| 2458      | HAL3         | 39  | MAL | H48C | 2458 | 0.09  |  |
| 1.008     | ; qtot 0     |     |     |      |      |       |  |
| ; residue | 40 MAL rtp   | MAL | q   | 0.0  |      |       |  |
| 2459      | CT1          | 40  | MAL | C1   | 2459 | -0.09 |  |
| 12.011    | ; qtot -0.09 |     |     |      |      |       |  |

|        |              |    |     |      |      |       |
|--------|--------------|----|-----|------|------|-------|
| 2460   | HB           | 40 | MAL | H1A  | 2460 | 0.09  |
| 1.008  | ; qtot 0     |    |     |      |      |       |
| 2461   | C            | 40 | MAL | C12  | 2461 | 0.51  |
| 12.011 | ; qtot 0.51  |    |     |      |      |       |
| 2462   | 0            | 40 | MAL | 012  | 2462 | -0.51 |
| 15.999 | ; qtot 0     |    |     |      |      |       |
| 2463   | NH1          | 40 | MAL | N1   | 2463 | -0.47 |
| 14.007 | ; qtot -0.47 |    |     |      |      |       |
| 2464   | H            | 40 | MAL | HN1  | 2464 | 0.31  |
| 1.008  | ; qtot -0.16 |    |     |      |      |       |
| 2465   | CT2          | 40 | MAL | C13  | 2465 | -0.02 |
| 12.011 | ; qtot -0.18 |    |     |      |      |       |
| 2466   | HB           | 40 | MAL | H13A | 2466 | 0.09  |
| 1.008  | ; qtot -0.09 |    |     |      |      |       |
| 2467   | HB           | 40 | MAL | H13B | 2467 | 0.09  |
| 1.008  | ; qtot 0     |    |     |      |      |       |
| 2468   | CTL2         | 40 | MAL | C14  | 2468 | -0.18 |
| 12.011 | ; qtot -0.18 |    |     |      |      |       |
| 2469   | HAL2         | 40 | MAL | H14A | 2469 | 0.09  |
| 1.008  | ; qtot -0.09 |    |     |      |      |       |
| 2470   | HAL2         | 40 | MAL | H14B | 2470 | 0.09  |
| 1.008  | ; qtot 0     |    |     |      |      |       |
| 2471   | CTL2         | 40 | MAL | C15  | 2471 | -0.1  |
| 12.011 | ; qtot -0.1  |    |     |      |      |       |
| 2472   | HAL2         | 40 | MAL | H15A | 2472 | 0.25  |
| 1.008  | ; qtot 0.15  |    |     |      |      |       |
| 2473   | HAL2         | 40 | MAL | H15B | 2473 | 0.25  |
| 1.008  | ; qtot 0.4   |    |     |      |      |       |
| 2474   | NTL          | 40 | MAL | N2   | 2474 | -0.6  |
| 14.007 | ; qtot -0.2  |    |     |      |      |       |
| 2475   | CTL5         | 40 | MAL | C16  | 2475 | -0.35 |
| 12.011 | ; qtot -0.55 |    |     |      |      |       |
| 2476   | HL           | 40 | MAL | H16A | 2476 | 0.25  |
| 1.008  | ; qtot -0.3  |    |     |      |      |       |
| 2477   | HL           | 40 | MAL | H16B | 2477 | 0.25  |
| 1.008  | ; qtot -0.05 |    |     |      |      |       |
| 2478   | HL           | 40 | MAL | H16C | 2478 | 0.25  |
| 1.008  | ; qtot 0.2   |    |     |      |      |       |
| 2479   | CTL5         | 40 | MAL | C17  | 2479 | -0.35 |
| 12.011 | ; qtot -0.15 |    |     |      |      |       |
| 2480   | HL           | 40 | MAL | H17A | 2480 | 0.25  |
| 1.008  | ; qtot 0.1   |    |     |      |      |       |
| 2481   | HL           | 40 | MAL | H17B | 2481 | 0.25  |
| 1.008  | ; qtot 0.35  |    |     |      |      |       |
| 2482   | HL           | 40 | MAL | H17C | 2482 | 0.25  |
| 1.008  | ; qtot 0.6   |    |     |      |      |       |
| 2483   | CTL5         | 40 | MAL | C18  | 2483 | -0.35 |
| 12.011 | ; qtot 0.25  |    |     |      |      |       |
| 2484   | HL           | 40 | MAL | H18A | 2484 | 0.25  |
| 1.008  | ; qtot 0.5   |    |     |      |      |       |
| 2485   | HL           | 40 | MAL | H18B | 2485 | 0.25  |
| 1.008  | ; qtot 0.75  |    |     |      |      |       |
| 2486   | HL           | 40 | MAL | H18C | 2486 | 0.25  |
| 1.008  | ; qtot 1     |    |     |      |      |       |

|        |              |    |     |      |      |       |
|--------|--------------|----|-----|------|------|-------|
| 2487   | CT1          | 40 | MAL | C2   | 2487 | -0.09 |
| 12.011 | ; qtot 0.91  |    |     |      |      |       |
| 2488   | HB           | 40 | MAL | H2   | 2488 | 0.09  |
| 1.008  | ; qtot 1     |    |     |      |      |       |
| 2489   | CC           | 40 | MAL | C21  | 2489 | 0.34  |
| 12.011 | ; qtot 1.34  |    |     |      |      |       |
| 2490   | OC           | 40 | MAL | O21  | 2490 | -0.67 |
| 15.999 | ; qtot 0.67  |    |     |      |      |       |
| 2491   | OC           | 40 | MAL | O22  | 2491 | -0.67 |
| 15.999 | ; qtot 0     |    |     |      |      |       |
| 2492   | CTL2         | 40 | MAL | C3   | 2492 | -0.18 |
| 12.011 | ; qtot -0.18 |    |     |      |      |       |
| 2493   | HAL2         | 40 | MAL | H3A  | 2493 | 0.09  |
| 1.008  | ; qtot -0.09 |    |     |      |      |       |
| 2494   | HAL2         | 40 | MAL | H3B  | 2494 | 0.09  |
| 1.008  | ; qtot 0     |    |     |      |      |       |
| 2495   | CTL1         | 40 | MAL | C4   | 2495 | -0.09 |
| 12.011 | ; qtot -0.09 |    |     |      |      |       |
| 2496   | HAL1         | 40 | MAL | H4A  | 2496 | 0.09  |
| 1.008  | ; qtot 0     |    |     |      |      |       |
| 2497   | CTL2         | 40 | MAL | C41  | 2497 | -0.18 |
| 12.011 | ; qtot -0.18 |    |     |      |      |       |
| 2498   | HAL2         | 40 | MAL | H41A | 2498 | 0.09  |
| 1.008  | ; qtot -0.09 |    |     |      |      |       |
| 2499   | HAL2         | 40 | MAL | H41B | 2499 | 0.09  |
| 1.008  | ; qtot 0     |    |     |      |      |       |
| 2500   | CTL2         | 40 | MAL | C42  | 2500 | -0.18 |
| 12.011 | ; qtot -0.18 |    |     |      |      |       |
| 2501   | HAL2         | 40 | MAL | H42A | 2501 | 0.09  |
| 1.008  | ; qtot -0.09 |    |     |      |      |       |
| 2502   | HAL2         | 40 | MAL | H42B | 2502 | 0.09  |
| 1.008  | ; qtot 0     |    |     |      |      |       |
| 2503   | CTL2         | 40 | MAL | C43  | 2503 | -0.18 |
| 12.011 | ; qtot -0.18 |    |     |      |      |       |
| 2504   | HAL2         | 40 | MAL | H43A | 2504 | 0.09  |
| 1.008  | ; qtot -0.09 |    |     |      |      |       |
| 2505   | HAL2         | 40 | MAL | H43B | 2505 | 0.09  |
| 1.008  | ; qtot 0     |    |     |      |      |       |
| 2506   | CTL2         | 40 | MAL | C44  | 2506 | -0.18 |
| 12.011 | ; qtot -0.18 |    |     |      |      |       |
| 2507   | HAL2         | 40 | MAL | H44A | 2507 | 0.09  |
| 1.008  | ; qtot -0.09 |    |     |      |      |       |
| 2508   | HAL2         | 40 | MAL | H44B | 2508 | 0.09  |
| 1.008  | ; qtot 0     |    |     |      |      |       |
| 2509   | CTL2         | 40 | MAL | C45  | 2509 | -0.18 |
| 12.011 | ; qtot -0.18 |    |     |      |      |       |
| 2510   | HAL2         | 40 | MAL | H45A | 2510 | 0.09  |
| 1.008  | ; qtot -0.09 |    |     |      |      |       |
| 2511   | HAL2         | 40 | MAL | H45B | 2511 | 0.09  |
| 1.008  | ; qtot 0     |    |     |      |      |       |
| 2512   | CTL2         | 40 | MAL | C46  | 2512 | -0.18 |
| 12.011 | ; qtot -0.18 |    |     |      |      |       |
| 2513   | HAL2         | 40 | MAL | H46A | 2513 | 0.09  |
| 1.008  | ; qtot -0.09 |    |     |      |      |       |

|                                |              |    |     |      |      |       |
|--------------------------------|--------------|----|-----|------|------|-------|
| 2514                           | HAL2         | 40 | MAL | H46B | 2514 | 0.09  |
| 1.008                          | ; qtot 0     |    |     |      |      |       |
| 2515                           | CTL2         | 40 | MAL | C47  | 2515 | -0.18 |
| 12.011                         | ; qtot -0.18 |    |     |      |      |       |
| 2516                           | HAL2         | 40 | MAL | H47A | 2516 | 0.09  |
| 1.008                          | ; qtot -0.09 |    |     |      |      |       |
| 2517                           | HAL2         | 40 | MAL | H47B | 2517 | 0.09  |
| 1.008                          | ; qtot 0     |    |     |      |      |       |
| 2518                           | CTL3         | 40 | MAL | C48  | 2518 | -0.27 |
| 12.011                         | ; qtot -0.27 |    |     |      |      |       |
| 2519                           | HAL3         | 40 | MAL | H48A | 2519 | 0.09  |
| 1.008                          | ; qtot -0.18 |    |     |      |      |       |
| 2520                           | HAL3         | 40 | MAL | H48B | 2520 | 0.09  |
| 1.008                          | ; qtot -0.09 |    |     |      |      |       |
| 2521                           | HAL3         | 40 | MAL | H48C | 2521 | 0.09  |
| 1.008                          | ; qtot 0     |    |     |      |      |       |
| ; residue 41 MAL rtp MAL q 0.0 |              |    |     |      |      |       |
| 2522                           | CT1          | 41 | MAL | C1   | 2522 | -0.09 |
| 12.011                         | ; qtot -0.09 |    |     |      |      |       |
| 2523                           | HB           | 41 | MAL | H1A  | 2523 | 0.09  |
| 1.008                          | ; qtot 0     |    |     |      |      |       |
| 2524                           | C            | 41 | MAL | C12  | 2524 | 0.51  |
| 12.011                         | ; qtot 0.51  |    |     |      |      |       |
| 2525                           | 0            | 41 | MAL | 012  | 2525 | -0.51 |
| 15.999                         | ; qtot 0     |    |     |      |      |       |
| 2526                           | NH1          | 41 | MAL | N1   | 2526 | -0.47 |
| 14.007                         | ; qtot -0.47 |    |     |      |      |       |
| 2527                           | H            | 41 | MAL | HN1  | 2527 | 0.31  |
| 1.008                          | ; qtot -0.16 |    |     |      |      |       |
| 2528                           | CT2          | 41 | MAL | C13  | 2528 | -0.02 |
| 12.011                         | ; qtot -0.18 |    |     |      |      |       |
| 2529                           | HB           | 41 | MAL | H13A | 2529 | 0.09  |
| 1.008                          | ; qtot -0.09 |    |     |      |      |       |
| 2530                           | HB           | 41 | MAL | H13B | 2530 | 0.09  |
| 1.008                          | ; qtot 0     |    |     |      |      |       |
| 2531                           | CTL2         | 41 | MAL | C14  | 2531 | -0.18 |
| 12.011                         | ; qtot -0.18 |    |     |      |      |       |
| 2532                           | HAL2         | 41 | MAL | H14A | 2532 | 0.09  |
| 1.008                          | ; qtot -0.09 |    |     |      |      |       |
| 2533                           | HAL2         | 41 | MAL | H14B | 2533 | 0.09  |
| 1.008                          | ; qtot 0     |    |     |      |      |       |
| 2534                           | CTL2         | 41 | MAL | C15  | 2534 | -0.1  |
| 12.011                         | ; qtot -0.1  |    |     |      |      |       |
| 2535                           | HAL2         | 41 | MAL | H15A | 2535 | 0.25  |
| 1.008                          | ; qtot 0.15  |    |     |      |      |       |
| 2536                           | HAL2         | 41 | MAL | H15B | 2536 | 0.25  |
| 1.008                          | ; qtot 0.4   |    |     |      |      |       |
| 2537                           | NTL          | 41 | MAL | N2   | 2537 | -0.6  |
| 14.007                         | ; qtot -0.2  |    |     |      |      |       |
| 2538                           | CTL5         | 41 | MAL | C16  | 2538 | -0.35 |
| 12.011                         | ; qtot -0.55 |    |     |      |      |       |
| 2539                           | HL           | 41 | MAL | H16A | 2539 | 0.25  |
| 1.008                          | ; qtot -0.3  |    |     |      |      |       |
| 2540                           | HL           | 41 | MAL | H16B | 2540 | 0.25  |

|        |              |    |     |      |      |       |
|--------|--------------|----|-----|------|------|-------|
| 1.008  | ; qtot -0.05 |    |     |      |      |       |
| 2541   | HL           | 41 | MAL | H16C | 2541 | 0.25  |
| 1.008  | ; qtot 0.2   |    |     |      |      |       |
| 2542   | CTL5         | 41 | MAL | C17  | 2542 | -0.35 |
| 12.011 | ; qtot -0.15 |    |     |      |      |       |
| 2543   | HL           | 41 | MAL | H17A | 2543 | 0.25  |
| 1.008  | ; qtot 0.1   |    |     |      |      |       |
| 2544   | HL           | 41 | MAL | H17B | 2544 | 0.25  |
| 1.008  | ; qtot 0.35  |    |     |      |      |       |
| 2545   | HL           | 41 | MAL | H17C | 2545 | 0.25  |
| 1.008  | ; qtot 0.6   |    |     |      |      |       |
| 2546   | CTL5         | 41 | MAL | C18  | 2546 | -0.35 |
| 12.011 | ; qtot 0.25  |    |     |      |      |       |
| 2547   | HL           | 41 | MAL | H18A | 2547 | 0.25  |
| 1.008  | ; qtot 0.5   |    |     |      |      |       |
| 2548   | HL           | 41 | MAL | H18B | 2548 | 0.25  |
| 1.008  | ; qtot 0.75  |    |     |      |      |       |
| 2549   | HL           | 41 | MAL | H18C | 2549 | 0.25  |
| 1.008  | ; qtot 1     |    |     |      |      |       |
| 2550   | CT1          | 41 | MAL | C2   | 2550 | -0.09 |
| 12.011 | ; qtot 0.91  |    |     |      |      |       |
| 2551   | HB           | 41 | MAL | H2   | 2551 | 0.09  |
| 1.008  | ; qtot 1     |    |     |      |      |       |
| 2552   | CC           | 41 | MAL | C21  | 2552 | 0.34  |
| 12.011 | ; qtot 1.34  |    |     |      |      |       |
| 2553   | OC           | 41 | MAL | O21  | 2553 | -0.67 |
| 15.999 | ; qtot 0.67  |    |     |      |      |       |
| 2554   | OC           | 41 | MAL | O22  | 2554 | -0.67 |
| 15.999 | ; qtot 0     |    |     |      |      |       |
| 2555   | CTL2         | 41 | MAL | C3   | 2555 | -0.18 |
| 12.011 | ; qtot -0.18 |    |     |      |      |       |
| 2556   | HAL2         | 41 | MAL | H3A  | 2556 | 0.09  |
| 1.008  | ; qtot -0.09 |    |     |      |      |       |
| 2557   | HAL2         | 41 | MAL | H3B  | 2557 | 0.09  |
| 1.008  | ; qtot 0     |    |     |      |      |       |
| 2558   | CTL1         | 41 | MAL | C4   | 2558 | -0.09 |
| 12.011 | ; qtot -0.09 |    |     |      |      |       |
| 2559   | HAL1         | 41 | MAL | H4A  | 2559 | 0.09  |
| 1.008  | ; qtot 0     |    |     |      |      |       |
| 2560   | CTL2         | 41 | MAL | C41  | 2560 | -0.18 |
| 12.011 | ; qtot -0.18 |    |     |      |      |       |
| 2561   | HAL2         | 41 | MAL | H41A | 2561 | 0.09  |
| 1.008  | ; qtot -0.09 |    |     |      |      |       |
| 2562   | HAL2         | 41 | MAL | H41B | 2562 | 0.09  |
| 1.008  | ; qtot 0     |    |     |      |      |       |
| 2563   | CTL2         | 41 | MAL | C42  | 2563 | -0.18 |
| 12.011 | ; qtot -0.18 |    |     |      |      |       |
| 2564   | HAL2         | 41 | MAL | H42A | 2564 | 0.09  |
| 1.008  | ; qtot -0.09 |    |     |      |      |       |
| 2565   | HAL2         | 41 | MAL | H42B | 2565 | 0.09  |
| 1.008  | ; qtot 0     |    |     |      |      |       |
| 2566   | CTL2         | 41 | MAL | C43  | 2566 | -0.18 |
| 12.011 | ; qtot -0.18 |    |     |      |      |       |
| 2567   | HAL2         | 41 | MAL | H43A | 2567 | 0.09  |



|        |                                |    |     |      |      |       |  |
|--------|--------------------------------|----|-----|------|------|-------|--|
| 1.008  | ; qtot -0.09                   |    |     |      |      |       |  |
| 2568   | HAL2                           | 41 | MAL | H43B | 2568 | 0.09  |  |
| 1.008  | ; qtot 0                       |    |     |      |      |       |  |
| 2569   | CTL2                           | 41 | MAL | C44  | 2569 | -0.18 |  |
| 12.011 | ; qtot -0.18                   |    |     |      |      |       |  |
| 2570   | HAL2                           | 41 | MAL | H44A | 2570 | 0.09  |  |
| 1.008  | ; qtot -0.09                   |    |     |      |      |       |  |
| 2571   | HAL2                           | 41 | MAL | H44B | 2571 | 0.09  |  |
| 1.008  | ; qtot 0                       |    |     |      |      |       |  |
| 2572   | CTL2                           | 41 | MAL | C45  | 2572 | -0.18 |  |
| 12.011 | ; qtot -0.18                   |    |     |      |      |       |  |
| 2573   | HAL2                           | 41 | MAL | H45A | 2573 | 0.09  |  |
| 1.008  | ; qtot -0.09                   |    |     |      |      |       |  |
| 2574   | HAL2                           | 41 | MAL | H45B | 2574 | 0.09  |  |
| 1.008  | ; qtot 0                       |    |     |      |      |       |  |
| 2575   | CTL2                           | 41 | MAL | C46  | 2575 | -0.18 |  |
| 12.011 | ; qtot -0.18                   |    |     |      |      |       |  |
| 2576   | HAL2                           | 41 | MAL | H46A | 2576 | 0.09  |  |
| 1.008  | ; qtot -0.09                   |    |     |      |      |       |  |
| 2577   | HAL2                           | 41 | MAL | H46B | 2577 | 0.09  |  |
| 1.008  | ; qtot 0                       |    |     |      |      |       |  |
| 2578   | CTL2                           | 41 | MAL | C47  | 2578 | -0.18 |  |
| 12.011 | ; qtot -0.18                   |    |     |      |      |       |  |
| 2579   | HAL2                           | 41 | MAL | H47A | 2579 | 0.09  |  |
| 1.008  | ; qtot -0.09                   |    |     |      |      |       |  |
| 2580   | HAL2                           | 41 | MAL | H47B | 2580 | 0.09  |  |
| 1.008  | ; qtot 0                       |    |     |      |      |       |  |
| 2581   | CTL3                           | 41 | MAL | C48  | 2581 | -0.27 |  |
| 12.011 | ; qtot -0.27                   |    |     |      |      |       |  |
| 2582   | HAL3                           | 41 | MAL | H48A | 2582 | 0.09  |  |
| 1.008  | ; qtot -0.18                   |    |     |      |      |       |  |
| 2583   | HAL3                           | 41 | MAL | H48B | 2583 | 0.09  |  |
| 1.008  | ; qtot -0.09                   |    |     |      |      |       |  |
| 2584   | HAL3                           | 41 | MAL | H48C | 2584 | 0.09  |  |
| 1.008  | ; qtot 0                       |    |     |      |      |       |  |
|        | ; residue 42 MAL rtp MAL q 0.0 |    |     |      |      |       |  |
| 2585   | CT1                            | 42 | MAL | C1   | 2585 | -0.09 |  |
| 12.011 | ; qtot -0.09                   |    |     |      |      |       |  |
| 2586   | HB                             | 42 | MAL | H1A  | 2586 | 0.09  |  |
| 1.008  | ; qtot 0                       |    |     |      |      |       |  |
| 2587   | C                              | 42 | MAL | C12  | 2587 | 0.51  |  |
| 12.011 | ; qtot 0.51                    |    |     |      |      |       |  |
| 2588   | 0                              | 42 | MAL | 012  | 2588 | -0.51 |  |
| 15.999 | ; qtot 0                       |    |     |      |      |       |  |
| 2589   | NH1                            | 42 | MAL | N1   | 2589 | -0.47 |  |
| 14.007 | ; qtot -0.47                   |    |     |      |      |       |  |
| 2590   | H                              | 42 | MAL | HN1  | 2590 | 0.31  |  |
| 1.008  | ; qtot -0.16                   |    |     |      |      |       |  |
| 2591   | CT2                            | 42 | MAL | C13  | 2591 | -0.02 |  |
| 12.011 | ; qtot -0.18                   |    |     |      |      |       |  |
| 2592   | HB                             | 42 | MAL | H13A | 2592 | 0.09  |  |
| 1.008  | ; qtot -0.09                   |    |     |      |      |       |  |
| 2593   | HB                             | 42 | MAL | H13B | 2593 | 0.09  |  |
| 1.008  | ; qtot 0                       |    |     |      |      |       |  |

|        |              |    |     |      |      |       |
|--------|--------------|----|-----|------|------|-------|
| 2594   | CTL2         | 42 | MAL | C14  | 2594 | -0.18 |
| 12.011 | ; qtot -0.18 |    |     |      |      |       |
| 2595   | HAL2         | 42 | MAL | H14A | 2595 | 0.09  |
| 1.008  | ; qtot -0.09 |    |     |      |      |       |
| 2596   | HAL2         | 42 | MAL | H14B | 2596 | 0.09  |
| 1.008  | ; qtot 0     |    |     |      |      |       |
| 2597   | CTL2         | 42 | MAL | C15  | 2597 | -0.1  |
| 12.011 | ; qtot -0.1  |    |     |      |      |       |
| 2598   | HAL2         | 42 | MAL | H15A | 2598 | 0.25  |
| 1.008  | ; qtot 0.15  |    |     |      |      |       |
| 2599   | HAL2         | 42 | MAL | H15B | 2599 | 0.25  |
| 1.008  | ; qtot 0.4   |    |     |      |      |       |
| 2600   | NTL          | 42 | MAL | N2   | 2600 | -0.6  |
| 14.007 | ; qtot -0.2  |    |     |      |      |       |
| 2601   | CTL5         | 42 | MAL | C16  | 2601 | -0.35 |
| 12.011 | ; qtot -0.55 |    |     |      |      |       |
| 2602   | HL           | 42 | MAL | H16A | 2602 | 0.25  |
| 1.008  | ; qtot -0.3  |    |     |      |      |       |
| 2603   | HL           | 42 | MAL | H16B | 2603 | 0.25  |
| 1.008  | ; qtot -0.05 |    |     |      |      |       |
| 2604   | HL           | 42 | MAL | H16C | 2604 | 0.25  |
| 1.008  | ; qtot 0.2   |    |     |      |      |       |
| 2605   | CTL5         | 42 | MAL | C17  | 2605 | -0.35 |
| 12.011 | ; qtot -0.15 |    |     |      |      |       |
| 2606   | HL           | 42 | MAL | H17A | 2606 | 0.25  |
| 1.008  | ; qtot 0.1   |    |     |      |      |       |
| 2607   | HL           | 42 | MAL | H17B | 2607 | 0.25  |
| 1.008  | ; qtot 0.35  |    |     |      |      |       |
| 2608   | HL           | 42 | MAL | H17C | 2608 | 0.25  |
| 1.008  | ; qtot 0.6   |    |     |      |      |       |
| 2609   | CTL5         | 42 | MAL | C18  | 2609 | -0.35 |
| 12.011 | ; qtot 0.25  |    |     |      |      |       |
| 2610   | HL           | 42 | MAL | H18A | 2610 | 0.25  |
| 1.008  | ; qtot 0.5   |    |     |      |      |       |
| 2611   | HL           | 42 | MAL | H18B | 2611 | 0.25  |
| 1.008  | ; qtot 0.75  |    |     |      |      |       |
| 2612   | HL           | 42 | MAL | H18C | 2612 | 0.25  |
| 1.008  | ; qtot 1     |    |     |      |      |       |
| 2613   | CT1          | 42 | MAL | C2   | 2613 | -0.09 |
| 12.011 | ; qtot 0.91  |    |     |      |      |       |
| 2614   | HB           | 42 | MAL | H2   | 2614 | 0.09  |
| 1.008  | ; qtot 1     |    |     |      |      |       |
| 2615   | CC           | 42 | MAL | C21  | 2615 | 0.34  |
| 12.011 | ; qtot 1.34  |    |     |      |      |       |
| 2616   | OC           | 42 | MAL | O21  | 2616 | -0.67 |
| 15.999 | ; qtot 0.67  |    |     |      |      |       |
| 2617   | OC           | 42 | MAL | O22  | 2617 | -0.67 |
| 15.999 | ; qtot 0     |    |     |      |      |       |
| 2618   | CTL2         | 42 | MAL | C3   | 2618 | -0.18 |
| 12.011 | ; qtot -0.18 |    |     |      |      |       |
| 2619   | HAL2         | 42 | MAL | H3A  | 2619 | 0.09  |
| 1.008  | ; qtot -0.09 |    |     |      |      |       |
| 2620   | HAL2         | 42 | MAL | H3B  | 2620 | 0.09  |
| 1.008  | ; qtot 0     |    |     |      |      |       |

|        |              |    |     |      |      |       |
|--------|--------------|----|-----|------|------|-------|
| 2621   | CTL1         | 42 | MAL | C4   | 2621 | -0.09 |
| 12.011 | ; qtot -0.09 |    |     |      |      |       |
| 2622   | HAL1         | 42 | MAL | H4A  | 2622 | 0.09  |
| 1.008  | ; qtot 0     |    |     |      |      |       |
| 2623   | CTL2         | 42 | MAL | C41  | 2623 | -0.18 |
| 12.011 | ; qtot -0.18 |    |     |      |      |       |
| 2624   | HAL2         | 42 | MAL | H41A | 2624 | 0.09  |
| 1.008  | ; qtot -0.09 |    |     |      |      |       |
| 2625   | HAL2         | 42 | MAL | H41B | 2625 | 0.09  |
| 1.008  | ; qtot 0     |    |     |      |      |       |
| 2626   | CTL2         | 42 | MAL | C42  | 2626 | -0.18 |
| 12.011 | ; qtot -0.18 |    |     |      |      |       |
| 2627   | HAL2         | 42 | MAL | H42A | 2627 | 0.09  |
| 1.008  | ; qtot -0.09 |    |     |      |      |       |
| 2628   | HAL2         | 42 | MAL | H42B | 2628 | 0.09  |
| 1.008  | ; qtot 0     |    |     |      |      |       |
| 2629   | CTL2         | 42 | MAL | C43  | 2629 | -0.18 |
| 12.011 | ; qtot -0.18 |    |     |      |      |       |
| 2630   | HAL2         | 42 | MAL | H43A | 2630 | 0.09  |
| 1.008  | ; qtot -0.09 |    |     |      |      |       |
| 2631   | HAL2         | 42 | MAL | H43B | 2631 | 0.09  |
| 1.008  | ; qtot 0     |    |     |      |      |       |
| 2632   | CTL2         | 42 | MAL | C44  | 2632 | -0.18 |
| 12.011 | ; qtot -0.18 |    |     |      |      |       |
| 2633   | HAL2         | 42 | MAL | H44A | 2633 | 0.09  |
| 1.008  | ; qtot -0.09 |    |     |      |      |       |
| 2634   | HAL2         | 42 | MAL | H44B | 2634 | 0.09  |
| 1.008  | ; qtot 0     |    |     |      |      |       |
| 2635   | CTL2         | 42 | MAL | C45  | 2635 | -0.18 |
| 12.011 | ; qtot -0.18 |    |     |      |      |       |
| 2636   | HAL2         | 42 | MAL | H45A | 2636 | 0.09  |
| 1.008  | ; qtot -0.09 |    |     |      |      |       |
| 2637   | HAL2         | 42 | MAL | H45B | 2637 | 0.09  |
| 1.008  | ; qtot 0     |    |     |      |      |       |
| 2638   | CTL2         | 42 | MAL | C46  | 2638 | -0.18 |
| 12.011 | ; qtot -0.18 |    |     |      |      |       |
| 2639   | HAL2         | 42 | MAL | H46A | 2639 | 0.09  |
| 1.008  | ; qtot -0.09 |    |     |      |      |       |
| 2640   | HAL2         | 42 | MAL | H46B | 2640 | 0.09  |
| 1.008  | ; qtot 0     |    |     |      |      |       |
| 2641   | CTL2         | 42 | MAL | C47  | 2641 | -0.18 |
| 12.011 | ; qtot -0.18 |    |     |      |      |       |
| 2642   | HAL2         | 42 | MAL | H47A | 2642 | 0.09  |
| 1.008  | ; qtot -0.09 |    |     |      |      |       |
| 2643   | HAL2         | 42 | MAL | H47B | 2643 | 0.09  |
| 1.008  | ; qtot 0     |    |     |      |      |       |
| 2644   | CTL3         | 42 | MAL | C48  | 2644 | -0.27 |
| 12.011 | ; qtot -0.27 |    |     |      |      |       |
| 2645   | HAL3         | 42 | MAL | H48A | 2645 | 0.09  |
| 1.008  | ; qtot -0.18 |    |     |      |      |       |
| 2646   | HAL3         | 42 | MAL | H48B | 2646 | 0.09  |
| 1.008  | ; qtot -0.09 |    |     |      |      |       |
| 2647   | HAL3         | 42 | MAL | H48C | 2647 | 0.09  |
| 1.008  | ; qtot 0     |    |     |      |      |       |

|           |    |        |     |       |     |      |      |       |
|-----------|----|--------|-----|-------|-----|------|------|-------|
| ; residue | 43 | MAL    | rtp | MAL   | q   | 0.0  |      |       |
| 2648      |    | CT1    |     | 43    | MAL | C1   | 2648 | -0.09 |
| 12.011    |    | ; qtot |     | -0.09 |     |      |      |       |
| 2649      |    | HB     |     | 43    | MAL | H1A  | 2649 | 0.09  |
| 1.008     |    | ; qtot |     | 0     |     |      |      |       |
| 2650      |    | C      |     | 43    | MAL | C12  | 2650 | 0.51  |
| 12.011    |    | ; qtot |     | 0.51  |     |      |      |       |
| 2651      |    | 0      |     | 43    | MAL | 012  | 2651 | -0.51 |
| 15.999    |    | ; qtot |     | 0     |     |      |      |       |
| 2652      |    | NH1    |     | 43    | MAL | N1   | 2652 | -0.47 |
| 14.007    |    | ; qtot |     | -0.47 |     |      |      |       |
| 2653      |    | H      |     | 43    | MAL | HN1  | 2653 | 0.31  |
| 1.008     |    | ; qtot |     | -0.16 |     |      |      |       |
| 2654      |    | CT2    |     | 43    | MAL | C13  | 2654 | -0.02 |
| 12.011    |    | ; qtot |     | -0.18 |     |      |      |       |
| 2655      |    | HB     |     | 43    | MAL | H13A | 2655 | 0.09  |
| 1.008     |    | ; qtot |     | -0.09 |     |      |      |       |
| 2656      |    | HB     |     | 43    | MAL | H13B | 2656 | 0.09  |
| 1.008     |    | ; qtot |     | 0     |     |      |      |       |
| 2657      |    | CTL2   |     | 43    | MAL | C14  | 2657 | -0.18 |
| 12.011    |    | ; qtot |     | -0.18 |     |      |      |       |
| 2658      |    | HAL2   |     | 43    | MAL | H14A | 2658 | 0.09  |
| 1.008     |    | ; qtot |     | -0.09 |     |      |      |       |
| 2659      |    | HAL2   |     | 43    | MAL | H14B | 2659 | 0.09  |
| 1.008     |    | ; qtot |     | 0     |     |      |      |       |
| 2660      |    | CTL2   |     | 43    | MAL | C15  | 2660 | -0.1  |
| 12.011    |    | ; qtot |     | -0.1  |     |      |      |       |
| 2661      |    | HAL2   |     | 43    | MAL | H15A | 2661 | 0.25  |
| 1.008     |    | ; qtot |     | 0.15  |     |      |      |       |
| 2662      |    | HAL2   |     | 43    | MAL | H15B | 2662 | 0.25  |
| 1.008     |    | ; qtot |     | 0.4   |     |      |      |       |
| 2663      |    | NTL    |     | 43    | MAL | N2   | 2663 | -0.6  |
| 14.007    |    | ; qtot |     | -0.2  |     |      |      |       |
| 2664      |    | CTL5   |     | 43    | MAL | C16  | 2664 | -0.35 |
| 12.011    |    | ; qtot |     | -0.55 |     |      |      |       |
| 2665      |    | HL     |     | 43    | MAL | H16A | 2665 | 0.25  |
| 1.008     |    | ; qtot |     | -0.3  |     |      |      |       |
| 2666      |    | HL     |     | 43    | MAL | H16B | 2666 | 0.25  |
| 1.008     |    | ; qtot |     | -0.05 |     |      |      |       |
| 2667      |    | HL     |     | 43    | MAL | H16C | 2667 | 0.25  |
| 1.008     |    | ; qtot |     | 0.2   |     |      |      |       |
| 2668      |    | CTL5   |     | 43    | MAL | C17  | 2668 | -0.35 |
| 12.011    |    | ; qtot |     | -0.15 |     |      |      |       |
| 2669      |    | HL     |     | 43    | MAL | H17A | 2669 | 0.25  |
| 1.008     |    | ; qtot |     | 0.1   |     |      |      |       |
| 2670      |    | HL     |     | 43    | MAL | H17B | 2670 | 0.25  |
| 1.008     |    | ; qtot |     | 0.35  |     |      |      |       |
| 2671      |    | HL     |     | 43    | MAL | H17C | 2671 | 0.25  |
| 1.008     |    | ; qtot |     | 0.6   |     |      |      |       |
| 2672      |    | CTL5   |     | 43    | MAL | C18  | 2672 | -0.35 |
| 12.011    |    | ; qtot |     | 0.25  |     |      |      |       |
| 2673      |    | HL     |     | 43    | MAL | H18A | 2673 | 0.25  |
| 1.008     |    | ; qtot |     | 0.5   |     |      |      |       |
| 2674      |    | HL     |     | 43    | MAL | H18B | 2674 | 0.25  |

|        |              |    |     |      |      |       |  |
|--------|--------------|----|-----|------|------|-------|--|
| 1.008  | ; qtot 0.75  |    |     |      |      |       |  |
| 2675   | HL           | 43 | MAL | H18C | 2675 | 0.25  |  |
| 1.008  | ; qtot 1     |    |     |      |      |       |  |
| 2676   | CT1          | 43 | MAL | C2   | 2676 | -0.09 |  |
| 12.011 | ; qtot 0.91  |    |     |      |      |       |  |
| 2677   | HB           | 43 | MAL | H2   | 2677 | 0.09  |  |
| 1.008  | ; qtot 1     |    |     |      |      |       |  |
| 2678   | CC           | 43 | MAL | C21  | 2678 | 0.34  |  |
| 12.011 | ; qtot 1.34  |    |     |      |      |       |  |
| 2679   | OC           | 43 | MAL | 021  | 2679 | -0.67 |  |
| 15.999 | ; qtot 0.67  |    |     |      |      |       |  |
| 2680   | OC           | 43 | MAL | 022  | 2680 | -0.67 |  |
| 15.999 | ; qtot 0     |    |     |      |      |       |  |
| 2681   | CTL2         | 43 | MAL | C3   | 2681 | -0.18 |  |
| 12.011 | ; qtot -0.18 |    |     |      |      |       |  |
| 2682   | HAL2         | 43 | MAL | H3A  | 2682 | 0.09  |  |
| 1.008  | ; qtot -0.09 |    |     |      |      |       |  |
| 2683   | HAL2         | 43 | MAL | H3B  | 2683 | 0.09  |  |
| 1.008  | ; qtot 0     |    |     |      |      |       |  |
| 2684   | CTL1         | 43 | MAL | C4   | 2684 | -0.09 |  |
| 12.011 | ; qtot -0.09 |    |     |      |      |       |  |
| 2685   | HAL1         | 43 | MAL | H4A  | 2685 | 0.09  |  |
| 1.008  | ; qtot 0     |    |     |      |      |       |  |
| 2686   | CTL2         | 43 | MAL | C41  | 2686 | -0.18 |  |
| 12.011 | ; qtot -0.18 |    |     |      |      |       |  |
| 2687   | HAL2         | 43 | MAL | H41A | 2687 | 0.09  |  |
| 1.008  | ; qtot -0.09 |    |     |      |      |       |  |
| 2688   | HAL2         | 43 | MAL | H41B | 2688 | 0.09  |  |
| 1.008  | ; qtot 0     |    |     |      |      |       |  |
| 2689   | CTL2         | 43 | MAL | C42  | 2689 | -0.18 |  |
| 12.011 | ; qtot -0.18 |    |     |      |      |       |  |
| 2690   | HAL2         | 43 | MAL | H42A | 2690 | 0.09  |  |
| 1.008  | ; qtot -0.09 |    |     |      |      |       |  |
| 2691   | HAL2         | 43 | MAL | H42B | 2691 | 0.09  |  |
| 1.008  | ; qtot 0     |    |     |      |      |       |  |
| 2692   | CTL2         | 43 | MAL | C43  | 2692 | -0.18 |  |
| 12.011 | ; qtot -0.18 |    |     |      |      |       |  |
| 2693   | HAL2         | 43 | MAL | H43A | 2693 | 0.09  |  |
| 1.008  | ; qtot -0.09 |    |     |      |      |       |  |
| 2694   | HAL2         | 43 | MAL | H43B | 2694 | 0.09  |  |
| 1.008  | ; qtot 0     |    |     |      |      |       |  |
| 2695   | CTL2         | 43 | MAL | C44  | 2695 | -0.18 |  |
| 12.011 | ; qtot -0.18 |    |     |      |      |       |  |
| 2696   | HAL2         | 43 | MAL | H44A | 2696 | 0.09  |  |
| 1.008  | ; qtot -0.09 |    |     |      |      |       |  |
| 2697   | HAL2         | 43 | MAL | H44B | 2697 | 0.09  |  |
| 1.008  | ; qtot 0     |    |     |      |      |       |  |
| 2698   | CTL2         | 43 | MAL | C45  | 2698 | -0.18 |  |
| 12.011 | ; qtot -0.18 |    |     |      |      |       |  |
| 2699   | HAL2         | 43 | MAL | H45A | 2699 | 0.09  |  |
| 1.008  | ; qtot -0.09 |    |     |      |      |       |  |
| 2700   | HAL2         | 43 | MAL | H45B | 2700 | 0.09  |  |
| 1.008  | ; qtot 0     |    |     |      |      |       |  |
| 2701   | CTL2         | 43 | MAL | C46  | 2701 | -0.18 |  |

|        |                                |    |     |      |      |       |
|--------|--------------------------------|----|-----|------|------|-------|
| 12.011 | ; qtot -0.18                   |    |     |      |      |       |
| 2702   | HAL2                           | 43 | MAL | H46A | 2702 | 0.09  |
| 1.008  | ; qtot -0.09                   |    |     |      |      |       |
| 2703   | HAL2                           | 43 | MAL | H46B | 2703 | 0.09  |
| 1.008  | ; qtot 0                       |    |     |      |      |       |
| 2704   | CTL2                           | 43 | MAL | C47  | 2704 | -0.18 |
| 12.011 | ; qtot -0.18                   |    |     |      |      |       |
| 2705   | HAL2                           | 43 | MAL | H47A | 2705 | 0.09  |
| 1.008  | ; qtot -0.09                   |    |     |      |      |       |
| 2706   | HAL2                           | 43 | MAL | H47B | 2706 | 0.09  |
| 1.008  | ; qtot 0                       |    |     |      |      |       |
| 2707   | CTL3                           | 43 | MAL | C48  | 2707 | -0.27 |
| 12.011 | ; qtot -0.27                   |    |     |      |      |       |
| 2708   | HAL3                           | 43 | MAL | H48A | 2708 | 0.09  |
| 1.008  | ; qtot -0.18                   |    |     |      |      |       |
| 2709   | HAL3                           | 43 | MAL | H48B | 2709 | 0.09  |
| 1.008  | ; qtot -0.09                   |    |     |      |      |       |
| 2710   | HAL3                           | 43 | MAL | H48C | 2710 | 0.09  |
| 1.008  | ; qtot 0                       |    |     |      |      |       |
|        | ; residue 44 MAL rtp MAL q 0.0 |    |     |      |      |       |
| 2711   | CT1                            | 44 | MAL | C1   | 2711 | -0.09 |
| 12.011 | ; qtot -0.09                   |    |     |      |      |       |
| 2712   | HB                             | 44 | MAL | H1A  | 2712 | 0.09  |
| 1.008  | ; qtot 0                       |    |     |      |      |       |
| 2713   | C                              | 44 | MAL | C12  | 2713 | 0.51  |
| 12.011 | ; qtot 0.51                    |    |     |      |      |       |
| 2714   | 0                              | 44 | MAL | 012  | 2714 | -0.51 |
| 15.999 | ; qtot 0                       |    |     |      |      |       |
| 2715   | NH1                            | 44 | MAL | N1   | 2715 | -0.47 |
| 14.007 | ; qtot -0.47                   |    |     |      |      |       |
| 2716   | H                              | 44 | MAL | HN1  | 2716 | 0.31  |
| 1.008  | ; qtot -0.16                   |    |     |      |      |       |
| 2717   | CT2                            | 44 | MAL | C13  | 2717 | -0.02 |
| 12.011 | ; qtot -0.18                   |    |     |      |      |       |
| 2718   | HB                             | 44 | MAL | H13A | 2718 | 0.09  |
| 1.008  | ; qtot -0.09                   |    |     |      |      |       |
| 2719   | HB                             | 44 | MAL | H13B | 2719 | 0.09  |
| 1.008  | ; qtot 0                       |    |     |      |      |       |
| 2720   | CTL2                           | 44 | MAL | C14  | 2720 | -0.18 |
| 12.011 | ; qtot -0.18                   |    |     |      |      |       |
| 2721   | HAL2                           | 44 | MAL | H14A | 2721 | 0.09  |
| 1.008  | ; qtot -0.09                   |    |     |      |      |       |
| 2722   | HAL2                           | 44 | MAL | H14B | 2722 | 0.09  |
| 1.008  | ; qtot 0                       |    |     |      |      |       |
| 2723   | CTL2                           | 44 | MAL | C15  | 2723 | -0.1  |
| 12.011 | ; qtot -0.1                    |    |     |      |      |       |
| 2724   | HAL2                           | 44 | MAL | H15A | 2724 | 0.25  |
| 1.008  | ; qtot 0.15                    |    |     |      |      |       |
| 2725   | HAL2                           | 44 | MAL | H15B | 2725 | 0.25  |
| 1.008  | ; qtot 0.4                     |    |     |      |      |       |
| 2726   | NTL                            | 44 | MAL | N2   | 2726 | -0.6  |
| 14.007 | ; qtot -0.2                    |    |     |      |      |       |
| 2727   | CTL5                           | 44 | MAL | C16  | 2727 | -0.35 |
| 12.011 | ; qtot -0.55                   |    |     |      |      |       |

|        |              |    |     |      |      |       |
|--------|--------------|----|-----|------|------|-------|
| 2728   | HL           | 44 | MAL | H16A | 2728 | 0.25  |
| 1.008  | ; qtot -0.3  |    |     |      |      |       |
| 2729   | HL           | 44 | MAL | H16B | 2729 | 0.25  |
| 1.008  | ; qtot -0.05 |    |     |      |      |       |
| 2730   | HL           | 44 | MAL | H16C | 2730 | 0.25  |
| 1.008  | ; qtot 0.2   |    |     |      |      |       |
| 2731   | CTL5         | 44 | MAL | C17  | 2731 | -0.35 |
| 12.011 | ; qtot -0.15 |    |     |      |      |       |
| 2732   | HL           | 44 | MAL | H17A | 2732 | 0.25  |
| 1.008  | ; qtot 0.1   |    |     |      |      |       |
| 2733   | HL           | 44 | MAL | H17B | 2733 | 0.25  |
| 1.008  | ; qtot 0.35  |    |     |      |      |       |
| 2734   | HL           | 44 | MAL | H17C | 2734 | 0.25  |
| 1.008  | ; qtot 0.6   |    |     |      |      |       |
| 2735   | CTL5         | 44 | MAL | C18  | 2735 | -0.35 |
| 12.011 | ; qtot 0.25  |    |     |      |      |       |
| 2736   | HL           | 44 | MAL | H18A | 2736 | 0.25  |
| 1.008  | ; qtot 0.5   |    |     |      |      |       |
| 2737   | HL           | 44 | MAL | H18B | 2737 | 0.25  |
| 1.008  | ; qtot 0.75  |    |     |      |      |       |
| 2738   | HL           | 44 | MAL | H18C | 2738 | 0.25  |
| 1.008  | ; qtot 1     |    |     |      |      |       |
| 2739   | CT1          | 44 | MAL | C2   | 2739 | -0.09 |
| 12.011 | ; qtot 0.91  |    |     |      |      |       |
| 2740   | HB           | 44 | MAL | H2   | 2740 | 0.09  |
| 1.008  | ; qtot 1     |    |     |      |      |       |
| 2741   | CC           | 44 | MAL | C21  | 2741 | 0.34  |
| 12.011 | ; qtot 1.34  |    |     |      |      |       |
| 2742   | OC           | 44 | MAL | 021  | 2742 | -0.67 |
| 15.999 | ; qtot 0.67  |    |     |      |      |       |
| 2743   | OC           | 44 | MAL | 022  | 2743 | -0.67 |
| 15.999 | ; qtot 0     |    |     |      |      |       |
| 2744   | CTL2         | 44 | MAL | C3   | 2744 | -0.18 |
| 12.011 | ; qtot -0.18 |    |     |      |      |       |
| 2745   | HAL2         | 44 | MAL | H3A  | 2745 | 0.09  |
| 1.008  | ; qtot -0.09 |    |     |      |      |       |
| 2746   | HAL2         | 44 | MAL | H3B  | 2746 | 0.09  |
| 1.008  | ; qtot 0     |    |     |      |      |       |
| 2747   | CTL1         | 44 | MAL | C4   | 2747 | -0.09 |
| 12.011 | ; qtot -0.09 |    |     |      |      |       |
| 2748   | HAL1         | 44 | MAL | H4A  | 2748 | 0.09  |
| 1.008  | ; qtot 0     |    |     |      |      |       |
| 2749   | CTL2         | 44 | MAL | C41  | 2749 | -0.18 |
| 12.011 | ; qtot -0.18 |    |     |      |      |       |
| 2750   | HAL2         | 44 | MAL | H41A | 2750 | 0.09  |
| 1.008  | ; qtot -0.09 |    |     |      |      |       |
| 2751   | HAL2         | 44 | MAL | H41B | 2751 | 0.09  |
| 1.008  | ; qtot 0     |    |     |      |      |       |
| 2752   | CTL2         | 44 | MAL | C42  | 2752 | -0.18 |
| 12.011 | ; qtot -0.18 |    |     |      |      |       |
| 2753   | HAL2         | 44 | MAL | H42A | 2753 | 0.09  |
| 1.008  | ; qtot -0.09 |    |     |      |      |       |
| 2754   | HAL2         | 44 | MAL | H42B | 2754 | 0.09  |
| 1.008  | ; qtot 0     |    |     |      |      |       |

|           |                |       |     |      |      |       |
|-----------|----------------|-------|-----|------|------|-------|
| 2755      | CTL2           | 44    | MAL | C43  | 2755 | -0.18 |
| 12.011    | ; qtot         | -0.18 |     |      |      |       |
| 2756      | HAL2           | 44    | MAL | H43A | 2756 | 0.09  |
| 1.008     | ; qtot         | -0.09 |     |      |      |       |
| 2757      | HAL2           | 44    | MAL | H43B | 2757 | 0.09  |
| 1.008     | ; qtot         | 0     |     |      |      |       |
| 2758      | CTL2           | 44    | MAL | C44  | 2758 | -0.18 |
| 12.011    | ; qtot         | -0.18 |     |      |      |       |
| 2759      | HAL2           | 44    | MAL | H44A | 2759 | 0.09  |
| 1.008     | ; qtot         | -0.09 |     |      |      |       |
| 2760      | HAL2           | 44    | MAL | H44B | 2760 | 0.09  |
| 1.008     | ; qtot         | 0     |     |      |      |       |
| 2761      | CTL2           | 44    | MAL | C45  | 2761 | -0.18 |
| 12.011    | ; qtot         | -0.18 |     |      |      |       |
| 2762      | HAL2           | 44    | MAL | H45A | 2762 | 0.09  |
| 1.008     | ; qtot         | -0.09 |     |      |      |       |
| 2763      | HAL2           | 44    | MAL | H45B | 2763 | 0.09  |
| 1.008     | ; qtot         | 0     |     |      |      |       |
| 2764      | CTL2           | 44    | MAL | C46  | 2764 | -0.18 |
| 12.011    | ; qtot         | -0.18 |     |      |      |       |
| 2765      | HAL2           | 44    | MAL | H46A | 2765 | 0.09  |
| 1.008     | ; qtot         | -0.09 |     |      |      |       |
| 2766      | HAL2           | 44    | MAL | H46B | 2766 | 0.09  |
| 1.008     | ; qtot         | 0     |     |      |      |       |
| 2767      | CTL2           | 44    | MAL | C47  | 2767 | -0.18 |
| 12.011    | ; qtot         | -0.18 |     |      |      |       |
| 2768      | HAL2           | 44    | MAL | H47A | 2768 | 0.09  |
| 1.008     | ; qtot         | -0.09 |     |      |      |       |
| 2769      | HAL2           | 44    | MAL | H47B | 2769 | 0.09  |
| 1.008     | ; qtot         | 0     |     |      |      |       |
| 2770      | CTL3           | 44    | MAL | C48  | 2770 | -0.27 |
| 12.011    | ; qtot         | -0.27 |     |      |      |       |
| 2771      | HAL3           | 44    | MAL | H48A | 2771 | 0.09  |
| 1.008     | ; qtot         | -0.18 |     |      |      |       |
| 2772      | HAL3           | 44    | MAL | H48B | 2772 | 0.09  |
| 1.008     | ; qtot         | -0.09 |     |      |      |       |
| 2773      | HAL3           | 44    | MAL | H48C | 2773 | 0.09  |
| 1.008     | ; qtot         | 0     |     |      |      |       |
| ; residue | 45 MAL rtp MAL | q     | 0.0 |      |      |       |
| 2774      | CT1            | 45    | MAL | C1   | 2774 | -0.09 |
| 12.011    | ; qtot         | -0.09 |     |      |      |       |
| 2775      | HB             | 45    | MAL | H1A  | 2775 | 0.09  |
| 1.008     | ; qtot         | 0     |     |      |      |       |
| 2776      | C              | 45    | MAL | C12  | 2776 | 0.51  |
| 12.011    | ; qtot         | 0.51  |     |      |      |       |
| 2777      | 0              | 45    | MAL | 012  | 2777 | -0.51 |
| 15.999    | ; qtot         | 0     |     |      |      |       |
| 2778      | NH1            | 45    | MAL | N1   | 2778 | -0.47 |
| 14.007    | ; qtot         | -0.47 |     |      |      |       |
| 2779      | H              | 45    | MAL | HN1  | 2779 | 0.31  |
| 1.008     | ; qtot         | -0.16 |     |      |      |       |
| 2780      | CT2            | 45    | MAL | C13  | 2780 | -0.02 |
| 12.011    | ; qtot         | -0.18 |     |      |      |       |
| 2781      | HB             | 45    | MAL | H13A | 2781 | 0.09  |



|        |              |    |     |      |      |       |  |
|--------|--------------|----|-----|------|------|-------|--|
| 1.008  | ; qtot -0.09 |    |     |      |      |       |  |
| 2782   | HB           | 45 | MAL | H13B | 2782 | 0.09  |  |
| 1.008  | ; qtot 0     |    |     |      |      |       |  |
| 2783   | CTL2         | 45 | MAL | C14  | 2783 | -0.18 |  |
| 12.011 | ; qtot -0.18 |    |     |      |      |       |  |
| 2784   | HAL2         | 45 | MAL | H14A | 2784 | 0.09  |  |
| 1.008  | ; qtot -0.09 |    |     |      |      |       |  |
| 2785   | HAL2         | 45 | MAL | H14B | 2785 | 0.09  |  |
| 1.008  | ; qtot 0     |    |     |      |      |       |  |
| 2786   | CTL2         | 45 | MAL | C15  | 2786 | -0.1  |  |
| 12.011 | ; qtot -0.1  |    |     |      |      |       |  |
| 2787   | HAL2         | 45 | MAL | H15A | 2787 | 0.25  |  |
| 1.008  | ; qtot 0.15  |    |     |      |      |       |  |
| 2788   | HAL2         | 45 | MAL | H15B | 2788 | 0.25  |  |
| 1.008  | ; qtot 0.4   |    |     |      |      |       |  |
| 2789   | NTL          | 45 | MAL | N2   | 2789 | -0.6  |  |
| 14.007 | ; qtot -0.2  |    |     |      |      |       |  |
| 2790   | CTL5         | 45 | MAL | C16  | 2790 | -0.35 |  |
| 12.011 | ; qtot -0.55 |    |     |      |      |       |  |
| 2791   | HL           | 45 | MAL | H16A | 2791 | 0.25  |  |
| 1.008  | ; qtot -0.3  |    |     |      |      |       |  |
| 2792   | HL           | 45 | MAL | H16B | 2792 | 0.25  |  |
| 1.008  | ; qtot -0.05 |    |     |      |      |       |  |
| 2793   | HL           | 45 | MAL | H16C | 2793 | 0.25  |  |
| 1.008  | ; qtot 0.2   |    |     |      |      |       |  |
| 2794   | CTL5         | 45 | MAL | C17  | 2794 | -0.35 |  |
| 12.011 | ; qtot -0.15 |    |     |      |      |       |  |
| 2795   | HL           | 45 | MAL | H17A | 2795 | 0.25  |  |
| 1.008  | ; qtot 0.1   |    |     |      |      |       |  |
| 2796   | HL           | 45 | MAL | H17B | 2796 | 0.25  |  |
| 1.008  | ; qtot 0.35  |    |     |      |      |       |  |
| 2797   | HL           | 45 | MAL | H17C | 2797 | 0.25  |  |
| 1.008  | ; qtot 0.6   |    |     |      |      |       |  |
| 2798   | CTL5         | 45 | MAL | C18  | 2798 | -0.35 |  |
| 12.011 | ; qtot 0.25  |    |     |      |      |       |  |
| 2799   | HL           | 45 | MAL | H18A | 2799 | 0.25  |  |
| 1.008  | ; qtot 0.5   |    |     |      |      |       |  |
| 2800   | HL           | 45 | MAL | H18B | 2800 | 0.25  |  |
| 1.008  | ; qtot 0.75  |    |     |      |      |       |  |
| 2801   | HL           | 45 | MAL | H18C | 2801 | 0.25  |  |
| 1.008  | ; qtot 1     |    |     |      |      |       |  |
| 2802   | CT1          | 45 | MAL | C2   | 2802 | -0.09 |  |
| 12.011 | ; qtot 0.91  |    |     |      |      |       |  |
| 2803   | HB           | 45 | MAL | H2   | 2803 | 0.09  |  |
| 1.008  | ; qtot 1     |    |     |      |      |       |  |
| 2804   | CC           | 45 | MAL | C21  | 2804 | 0.34  |  |
| 12.011 | ; qtot 1.34  |    |     |      |      |       |  |
| 2805   | OC           | 45 | MAL | O21  | 2805 | -0.67 |  |
| 15.999 | ; qtot 0.67  |    |     |      |      |       |  |
| 2806   | OC           | 45 | MAL | O22  | 2806 | -0.67 |  |
| 15.999 | ; qtot 0     |    |     |      |      |       |  |
| 2807   | CTL2         | 45 | MAL | C3   | 2807 | -0.18 |  |
| 12.011 | ; qtot -0.18 |    |     |      |      |       |  |
| 2808   | HAL2         | 45 | MAL | H3A  | 2808 | 0.09  |  |

|        |              |    |     |      |      |       |  |
|--------|--------------|----|-----|------|------|-------|--|
| 1.008  | ; qtot -0.09 |    |     |      |      |       |  |
| 2809   | HAL2         | 45 | MAL | H3B  | 2809 | 0.09  |  |
| 1.008  | ; qtot 0     |    |     |      |      |       |  |
| 2810   | CTL1         | 45 | MAL | C4   | 2810 | -0.09 |  |
| 12.011 | ; qtot -0.09 |    |     |      |      |       |  |
| 2811   | HAL1         | 45 | MAL | H4A  | 2811 | 0.09  |  |
| 1.008  | ; qtot 0     |    |     |      |      |       |  |
| 2812   | CTL2         | 45 | MAL | C41  | 2812 | -0.18 |  |
| 12.011 | ; qtot -0.18 |    |     |      |      |       |  |
| 2813   | HAL2         | 45 | MAL | H41A | 2813 | 0.09  |  |
| 1.008  | ; qtot -0.09 |    |     |      |      |       |  |
| 2814   | HAL2         | 45 | MAL | H41B | 2814 | 0.09  |  |
| 1.008  | ; qtot 0     |    |     |      |      |       |  |
| 2815   | CTL2         | 45 | MAL | C42  | 2815 | -0.18 |  |
| 12.011 | ; qtot -0.18 |    |     |      |      |       |  |
| 2816   | HAL2         | 45 | MAL | H42A | 2816 | 0.09  |  |
| 1.008  | ; qtot -0.09 |    |     |      |      |       |  |
| 2817   | HAL2         | 45 | MAL | H42B | 2817 | 0.09  |  |
| 1.008  | ; qtot 0     |    |     |      |      |       |  |
| 2818   | CTL2         | 45 | MAL | C43  | 2818 | -0.18 |  |
| 12.011 | ; qtot -0.18 |    |     |      |      |       |  |
| 2819   | HAL2         | 45 | MAL | H43A | 2819 | 0.09  |  |
| 1.008  | ; qtot -0.09 |    |     |      |      |       |  |
| 2820   | HAL2         | 45 | MAL | H43B | 2820 | 0.09  |  |
| 1.008  | ; qtot 0     |    |     |      |      |       |  |
| 2821   | CTL2         | 45 | MAL | C44  | 2821 | -0.18 |  |
| 12.011 | ; qtot -0.18 |    |     |      |      |       |  |
| 2822   | HAL2         | 45 | MAL | H44A | 2822 | 0.09  |  |
| 1.008  | ; qtot -0.09 |    |     |      |      |       |  |
| 2823   | HAL2         | 45 | MAL | H44B | 2823 | 0.09  |  |
| 1.008  | ; qtot 0     |    |     |      |      |       |  |
| 2824   | CTL2         | 45 | MAL | C45  | 2824 | -0.18 |  |
| 12.011 | ; qtot -0.18 |    |     |      |      |       |  |
| 2825   | HAL2         | 45 | MAL | H45A | 2825 | 0.09  |  |
| 1.008  | ; qtot -0.09 |    |     |      |      |       |  |
| 2826   | HAL2         | 45 | MAL | H45B | 2826 | 0.09  |  |
| 1.008  | ; qtot 0     |    |     |      |      |       |  |
| 2827   | CTL2         | 45 | MAL | C46  | 2827 | -0.18 |  |
| 12.011 | ; qtot -0.18 |    |     |      |      |       |  |
| 2828   | HAL2         | 45 | MAL | H46A | 2828 | 0.09  |  |
| 1.008  | ; qtot -0.09 |    |     |      |      |       |  |
| 2829   | HAL2         | 45 | MAL | H46B | 2829 | 0.09  |  |
| 1.008  | ; qtot 0     |    |     |      |      |       |  |
| 2830   | CTL2         | 45 | MAL | C47  | 2830 | -0.18 |  |
| 12.011 | ; qtot -0.18 |    |     |      |      |       |  |
| 2831   | HAL2         | 45 | MAL | H47A | 2831 | 0.09  |  |
| 1.008  | ; qtot -0.09 |    |     |      |      |       |  |
| 2832   | HAL2         | 45 | MAL | H47B | 2832 | 0.09  |  |
| 1.008  | ; qtot 0     |    |     |      |      |       |  |
| 2833   | CTL3         | 45 | MAL | C48  | 2833 | -0.27 |  |
| 12.011 | ; qtot -0.27 |    |     |      |      |       |  |
| 2834   | HAL3         | 45 | MAL | H48A | 2834 | 0.09  |  |
| 1.008  | ; qtot -0.18 |    |     |      |      |       |  |
| 2835   | HAL3         | 45 | MAL | H48B | 2835 | 0.09  |  |

|           |                |    |     |      |      |       |  |
|-----------|----------------|----|-----|------|------|-------|--|
| 1.008     | ; qtot -0.09   |    |     |      |      |       |  |
| 2836      | HAL3           | 45 | MAL | H48C | 2836 | 0.09  |  |
| 1.008     | ; qtot 0       |    |     |      |      |       |  |
| ; residue | 46 MAL rtp MAL |    | q   | 0.0  |      |       |  |
| 2837      | CT1            | 46 | MAL | C1   | 2837 | -0.09 |  |
| 12.011    | ; qtot -0.09   |    |     |      |      |       |  |
| 2838      | HB             | 46 | MAL | H1A  | 2838 | 0.09  |  |
| 1.008     | ; qtot 0       |    |     |      |      |       |  |
| 2839      | C              | 46 | MAL | C12  | 2839 | 0.51  |  |
| 12.011    | ; qtot 0.51    |    |     |      |      |       |  |
| 2840      | 0              | 46 | MAL | 012  | 2840 | -0.51 |  |
| 15.999    | ; qtot 0       |    |     |      |      |       |  |
| 2841      | NH1            | 46 | MAL | N1   | 2841 | -0.47 |  |
| 14.007    | ; qtot -0.47   |    |     |      |      |       |  |
| 2842      | H              | 46 | MAL | HN1  | 2842 | 0.31  |  |
| 1.008     | ; qtot -0.16   |    |     |      |      |       |  |
| 2843      | CT2            | 46 | MAL | C13  | 2843 | -0.02 |  |
| 12.011    | ; qtot -0.18   |    |     |      |      |       |  |
| 2844      | HB             | 46 | MAL | H13A | 2844 | 0.09  |  |
| 1.008     | ; qtot -0.09   |    |     |      |      |       |  |
| 2845      | HB             | 46 | MAL | H13B | 2845 | 0.09  |  |
| 1.008     | ; qtot 0       |    |     |      |      |       |  |
| 2846      | CTL2           | 46 | MAL | C14  | 2846 | -0.18 |  |
| 12.011    | ; qtot -0.18   |    |     |      |      |       |  |
| 2847      | HAL2           | 46 | MAL | H14A | 2847 | 0.09  |  |
| 1.008     | ; qtot -0.09   |    |     |      |      |       |  |
| 2848      | HAL2           | 46 | MAL | H14B | 2848 | 0.09  |  |
| 1.008     | ; qtot 0       |    |     |      |      |       |  |
| 2849      | CTL2           | 46 | MAL | C15  | 2849 | -0.1  |  |
| 12.011    | ; qtot -0.1    |    |     |      |      |       |  |
| 2850      | HAL2           | 46 | MAL | H15A | 2850 | 0.25  |  |
| 1.008     | ; qtot 0.15    |    |     |      |      |       |  |
| 2851      | HAL2           | 46 | MAL | H15B | 2851 | 0.25  |  |
| 1.008     | ; qtot 0.4     |    |     |      |      |       |  |
| 2852      | NTL            | 46 | MAL | N2   | 2852 | -0.6  |  |
| 14.007    | ; qtot -0.2    |    |     |      |      |       |  |
| 2853      | CTL5           | 46 | MAL | C16  | 2853 | -0.35 |  |
| 12.011    | ; qtot -0.55   |    |     |      |      |       |  |
| 2854      | HL             | 46 | MAL | H16A | 2854 | 0.25  |  |
| 1.008     | ; qtot -0.3    |    |     |      |      |       |  |
| 2855      | HL             | 46 | MAL | H16B | 2855 | 0.25  |  |
| 1.008     | ; qtot -0.05   |    |     |      |      |       |  |
| 2856      | HL             | 46 | MAL | H16C | 2856 | 0.25  |  |
| 1.008     | ; qtot 0.2     |    |     |      |      |       |  |
| 2857      | CTL5           | 46 | MAL | C17  | 2857 | -0.35 |  |
| 12.011    | ; qtot -0.15   |    |     |      |      |       |  |
| 2858      | HL             | 46 | MAL | H17A | 2858 | 0.25  |  |
| 1.008     | ; qtot 0.1     |    |     |      |      |       |  |
| 2859      | HL             | 46 | MAL | H17B | 2859 | 0.25  |  |
| 1.008     | ; qtot 0.35    |    |     |      |      |       |  |
| 2860      | HL             | 46 | MAL | H17C | 2860 | 0.25  |  |
| 1.008     | ; qtot 0.6     |    |     |      |      |       |  |
| 2861      | CTL5           | 46 | MAL | C18  | 2861 | -0.35 |  |
| 12.011    | ; qtot 0.25    |    |     |      |      |       |  |

|        |              |    |     |      |      |       |
|--------|--------------|----|-----|------|------|-------|
| 2862   | HL           | 46 | MAL | H18A | 2862 | 0.25  |
| 1.008  | ; qtot 0.5   |    |     |      |      |       |
| 2863   | HL           | 46 | MAL | H18B | 2863 | 0.25  |
| 1.008  | ; qtot 0.75  |    |     |      |      |       |
| 2864   | HL           | 46 | MAL | H18C | 2864 | 0.25  |
| 1.008  | ; qtot 1     |    |     |      |      |       |
| 2865   | CT1          | 46 | MAL | C2   | 2865 | -0.09 |
| 12.011 | ; qtot 0.91  |    |     |      |      |       |
| 2866   | HB           | 46 | MAL | H2   | 2866 | 0.09  |
| 1.008  | ; qtot 1     |    |     |      |      |       |
| 2867   | CC           | 46 | MAL | C21  | 2867 | 0.34  |
| 12.011 | ; qtot 1.34  |    |     |      |      |       |
| 2868   | OC           | 46 | MAL | 021  | 2868 | -0.67 |
| 15.999 | ; qtot 0.67  |    |     |      |      |       |
| 2869   | OC           | 46 | MAL | 022  | 2869 | -0.67 |
| 15.999 | ; qtot 0     |    |     |      |      |       |
| 2870   | CTL2         | 46 | MAL | C3   | 2870 | -0.18 |
| 12.011 | ; qtot -0.18 |    |     |      |      |       |
| 2871   | HAL2         | 46 | MAL | H3A  | 2871 | 0.09  |
| 1.008  | ; qtot -0.09 |    |     |      |      |       |
| 2872   | HAL2         | 46 | MAL | H3B  | 2872 | 0.09  |
| 1.008  | ; qtot 0     |    |     |      |      |       |
| 2873   | CTL1         | 46 | MAL | C4   | 2873 | -0.09 |
| 12.011 | ; qtot -0.09 |    |     |      |      |       |
| 2874   | HAL1         | 46 | MAL | H4A  | 2874 | 0.09  |
| 1.008  | ; qtot 0     |    |     |      |      |       |
| 2875   | CTL2         | 46 | MAL | C41  | 2875 | -0.18 |
| 12.011 | ; qtot -0.18 |    |     |      |      |       |
| 2876   | HAL2         | 46 | MAL | H41A | 2876 | 0.09  |
| 1.008  | ; qtot -0.09 |    |     |      |      |       |
| 2877   | HAL2         | 46 | MAL | H41B | 2877 | 0.09  |
| 1.008  | ; qtot 0     |    |     |      |      |       |
| 2878   | CTL2         | 46 | MAL | C42  | 2878 | -0.18 |
| 12.011 | ; qtot -0.18 |    |     |      |      |       |
| 2879   | HAL2         | 46 | MAL | H42A | 2879 | 0.09  |
| 1.008  | ; qtot -0.09 |    |     |      |      |       |
| 2880   | HAL2         | 46 | MAL | H42B | 2880 | 0.09  |
| 1.008  | ; qtot 0     |    |     |      |      |       |
| 2881   | CTL2         | 46 | MAL | C43  | 2881 | -0.18 |
| 12.011 | ; qtot -0.18 |    |     |      |      |       |
| 2882   | HAL2         | 46 | MAL | H43A | 2882 | 0.09  |
| 1.008  | ; qtot -0.09 |    |     |      |      |       |
| 2883   | HAL2         | 46 | MAL | H43B | 2883 | 0.09  |
| 1.008  | ; qtot 0     |    |     |      |      |       |
| 2884   | CTL2         | 46 | MAL | C44  | 2884 | -0.18 |
| 12.011 | ; qtot -0.18 |    |     |      |      |       |
| 2885   | HAL2         | 46 | MAL | H44A | 2885 | 0.09  |
| 1.008  | ; qtot -0.09 |    |     |      |      |       |
| 2886   | HAL2         | 46 | MAL | H44B | 2886 | 0.09  |
| 1.008  | ; qtot 0     |    |     |      |      |       |
| 2887   | CTL2         | 46 | MAL | C45  | 2887 | -0.18 |
| 12.011 | ; qtot -0.18 |    |     |      |      |       |
| 2888   | HAL2         | 46 | MAL | H45A | 2888 | 0.09  |
| 1.008  | ; qtot -0.09 |    |     |      |      |       |

|                                |              |    |     |      |      |       |
|--------------------------------|--------------|----|-----|------|------|-------|
| 2889                           | HAL2         | 46 | MAL | H45B | 2889 | 0.09  |
| 1.008                          | ; qtot 0     |    |     |      |      |       |
| 2890                           | CTL2         | 46 | MAL | C46  | 2890 | -0.18 |
| 12.011                         | ; qtot -0.18 |    |     |      |      |       |
| 2891                           | HAL2         | 46 | MAL | H46A | 2891 | 0.09  |
| 1.008                          | ; qtot -0.09 |    |     |      |      |       |
| 2892                           | HAL2         | 46 | MAL | H46B | 2892 | 0.09  |
| 1.008                          | ; qtot 0     |    |     |      |      |       |
| 2893                           | CTL2         | 46 | MAL | C47  | 2893 | -0.18 |
| 12.011                         | ; qtot -0.18 |    |     |      |      |       |
| 2894                           | HAL2         | 46 | MAL | H47A | 2894 | 0.09  |
| 1.008                          | ; qtot -0.09 |    |     |      |      |       |
| 2895                           | HAL2         | 46 | MAL | H47B | 2895 | 0.09  |
| 1.008                          | ; qtot 0     |    |     |      |      |       |
| 2896                           | CTL3         | 46 | MAL | C48  | 2896 | -0.27 |
| 12.011                         | ; qtot -0.27 |    |     |      |      |       |
| 2897                           | HAL3         | 46 | MAL | H48A | 2897 | 0.09  |
| 1.008                          | ; qtot -0.18 |    |     |      |      |       |
| 2898                           | HAL3         | 46 | MAL | H48B | 2898 | 0.09  |
| 1.008                          | ; qtot -0.09 |    |     |      |      |       |
| 2899                           | HAL3         | 46 | MAL | H48C | 2899 | 0.09  |
| 1.008                          | ; qtot 0     |    |     |      |      |       |
| ; residue 47 MAL rtp MAL q 0.0 |              |    |     |      |      |       |
| 2900                           | CT1          | 47 | MAL | C1   | 2900 | -0.09 |
| 12.011                         | ; qtot -0.09 |    |     |      |      |       |
| 2901                           | HB           | 47 | MAL | H1A  | 2901 | 0.09  |
| 1.008                          | ; qtot 0     |    |     |      |      |       |
| 2902                           | C            | 47 | MAL | C12  | 2902 | 0.51  |
| 12.011                         | ; qtot 0.51  |    |     |      |      |       |
| 2903                           | 0            | 47 | MAL | 012  | 2903 | -0.51 |
| 15.999                         | ; qtot 0     |    |     |      |      |       |
| 2904                           | NH1          | 47 | MAL | N1   | 2904 | -0.47 |
| 14.007                         | ; qtot -0.47 |    |     |      |      |       |
| 2905                           | H            | 47 | MAL | HN1  | 2905 | 0.31  |
| 1.008                          | ; qtot -0.16 |    |     |      |      |       |
| 2906                           | CT2          | 47 | MAL | C13  | 2906 | -0.02 |
| 12.011                         | ; qtot -0.18 |    |     |      |      |       |
| 2907                           | HB           | 47 | MAL | H13A | 2907 | 0.09  |
| 1.008                          | ; qtot -0.09 |    |     |      |      |       |
| 2908                           | HB           | 47 | MAL | H13B | 2908 | 0.09  |
| 1.008                          | ; qtot 0     |    |     |      |      |       |
| 2909                           | CTL2         | 47 | MAL | C14  | 2909 | -0.18 |
| 12.011                         | ; qtot -0.18 |    |     |      |      |       |
| 2910                           | HAL2         | 47 | MAL | H14A | 2910 | 0.09  |
| 1.008                          | ; qtot -0.09 |    |     |      |      |       |
| 2911                           | HAL2         | 47 | MAL | H14B | 2911 | 0.09  |
| 1.008                          | ; qtot 0     |    |     |      |      |       |
| 2912                           | CTL2         | 47 | MAL | C15  | 2912 | -0.1  |
| 12.011                         | ; qtot -0.1  |    |     |      |      |       |
| 2913                           | HAL2         | 47 | MAL | H15A | 2913 | 0.25  |
| 1.008                          | ; qtot 0.15  |    |     |      |      |       |
| 2914                           | HAL2         | 47 | MAL | H15B | 2914 | 0.25  |
| 1.008                          | ; qtot 0.4   |    |     |      |      |       |
| 2915                           | N1L          | 47 | MAL | N2   | 2915 | -0.6  |

|        |              |    |     |      |      |       |  |
|--------|--------------|----|-----|------|------|-------|--|
| 14.007 | ; qtot -0.2  |    |     |      |      |       |  |
| 2916   | CTL5         | 47 | MAL | C16  | 2916 | -0.35 |  |
| 12.011 | ; qtot -0.55 |    |     |      |      |       |  |
| 2917   | HL           | 47 | MAL | H16A | 2917 | 0.25  |  |
| 1.008  | ; qtot -0.3  |    |     |      |      |       |  |
| 2918   | HL           | 47 | MAL | H16B | 2918 | 0.25  |  |
| 1.008  | ; qtot -0.05 |    |     |      |      |       |  |
| 2919   | HL           | 47 | MAL | H16C | 2919 | 0.25  |  |
| 1.008  | ; qtot 0.2   |    |     |      |      |       |  |
| 2920   | CTL5         | 47 | MAL | C17  | 2920 | -0.35 |  |
| 12.011 | ; qtot -0.15 |    |     |      |      |       |  |
| 2921   | HL           | 47 | MAL | H17A | 2921 | 0.25  |  |
| 1.008  | ; qtot 0.1   |    |     |      |      |       |  |
| 2922   | HL           | 47 | MAL | H17B | 2922 | 0.25  |  |
| 1.008  | ; qtot 0.35  |    |     |      |      |       |  |
| 2923   | HL           | 47 | MAL | H17C | 2923 | 0.25  |  |
| 1.008  | ; qtot 0.6   |    |     |      |      |       |  |
| 2924   | CTL5         | 47 | MAL | C18  | 2924 | -0.35 |  |
| 12.011 | ; qtot 0.25  |    |     |      |      |       |  |
| 2925   | HL           | 47 | MAL | H18A | 2925 | 0.25  |  |
| 1.008  | ; qtot 0.5   |    |     |      |      |       |  |
| 2926   | HL           | 47 | MAL | H18B | 2926 | 0.25  |  |
| 1.008  | ; qtot 0.75  |    |     |      |      |       |  |
| 2927   | HL           | 47 | MAL | H18C | 2927 | 0.25  |  |
| 1.008  | ; qtot 1     |    |     |      |      |       |  |
| 2928   | CT1          | 47 | MAL | C2   | 2928 | -0.09 |  |
| 12.011 | ; qtot 0.91  |    |     |      |      |       |  |
| 2929   | HB           | 47 | MAL | H2   | 2929 | 0.09  |  |
| 1.008  | ; qtot 1     |    |     |      |      |       |  |
| 2930   | CC           | 47 | MAL | C21  | 2930 | 0.34  |  |
| 12.011 | ; qtot 1.34  |    |     |      |      |       |  |
| 2931   | OC           | 47 | MAL | O21  | 2931 | -0.67 |  |
| 15.999 | ; qtot 0.67  |    |     |      |      |       |  |
| 2932   | OC           | 47 | MAL | O22  | 2932 | -0.67 |  |
| 15.999 | ; qtot 0     |    |     |      |      |       |  |
| 2933   | CTL2         | 47 | MAL | C3   | 2933 | -0.18 |  |
| 12.011 | ; qtot -0.18 |    |     |      |      |       |  |
| 2934   | HAL2         | 47 | MAL | H3A  | 2934 | 0.09  |  |
| 1.008  | ; qtot -0.09 |    |     |      |      |       |  |
| 2935   | HAL2         | 47 | MAL | H3B  | 2935 | 0.09  |  |
| 1.008  | ; qtot 0     |    |     |      |      |       |  |
| 2936   | CTL1         | 47 | MAL | C4   | 2936 | -0.09 |  |
| 12.011 | ; qtot -0.09 |    |     |      |      |       |  |
| 2937   | HAL1         | 47 | MAL | H4A  | 2937 | 0.09  |  |
| 1.008  | ; qtot 0     |    |     |      |      |       |  |
| 2938   | CTL2         | 47 | MAL | C41  | 2938 | -0.18 |  |
| 12.011 | ; qtot -0.18 |    |     |      |      |       |  |
| 2939   | HAL2         | 47 | MAL | H41A | 2939 | 0.09  |  |
| 1.008  | ; qtot -0.09 |    |     |      |      |       |  |
| 2940   | HAL2         | 47 | MAL | H41B | 2940 | 0.09  |  |
| 1.008  | ; qtot 0     |    |     |      |      |       |  |
| 2941   | CTL2         | 47 | MAL | C42  | 2941 | -0.18 |  |
| 12.011 | ; qtot -0.18 |    |     |      |      |       |  |
| 2942   | HAL2         | 47 | MAL | H42A | 2942 | 0.09  |  |

|        |                                |    |     |      |      |       |
|--------|--------------------------------|----|-----|------|------|-------|
| 1.008  | ; qtot -0.09                   |    |     |      |      |       |
| 2943   | HAL2                           | 47 | MAL | H42B | 2943 | 0.09  |
| 1.008  | ; qtot 0                       |    |     |      |      |       |
| 2944   | CTL2                           | 47 | MAL | C43  | 2944 | -0.18 |
| 12.011 | ; qtot -0.18                   |    |     |      |      |       |
| 2945   | HAL2                           | 47 | MAL | H43A | 2945 | 0.09  |
| 1.008  | ; qtot -0.09                   |    |     |      |      |       |
| 2946   | HAL2                           | 47 | MAL | H43B | 2946 | 0.09  |
| 1.008  | ; qtot 0                       |    |     |      |      |       |
| 2947   | CTL2                           | 47 | MAL | C44  | 2947 | -0.18 |
| 12.011 | ; qtot -0.18                   |    |     |      |      |       |
| 2948   | HAL2                           | 47 | MAL | H44A | 2948 | 0.09  |
| 1.008  | ; qtot -0.09                   |    |     |      |      |       |
| 2949   | HAL2                           | 47 | MAL | H44B | 2949 | 0.09  |
| 1.008  | ; qtot 0                       |    |     |      |      |       |
| 2950   | CTL2                           | 47 | MAL | C45  | 2950 | -0.18 |
| 12.011 | ; qtot -0.18                   |    |     |      |      |       |
| 2951   | HAL2                           | 47 | MAL | H45A | 2951 | 0.09  |
| 1.008  | ; qtot -0.09                   |    |     |      |      |       |
| 2952   | HAL2                           | 47 | MAL | H45B | 2952 | 0.09  |
| 1.008  | ; qtot 0                       |    |     |      |      |       |
| 2953   | CTL2                           | 47 | MAL | C46  | 2953 | -0.18 |
| 12.011 | ; qtot -0.18                   |    |     |      |      |       |
| 2954   | HAL2                           | 47 | MAL | H46A | 2954 | 0.09  |
| 1.008  | ; qtot -0.09                   |    |     |      |      |       |
| 2955   | HAL2                           | 47 | MAL | H46B | 2955 | 0.09  |
| 1.008  | ; qtot 0                       |    |     |      |      |       |
| 2956   | CTL2                           | 47 | MAL | C47  | 2956 | -0.18 |
| 12.011 | ; qtot -0.18                   |    |     |      |      |       |
| 2957   | HAL2                           | 47 | MAL | H47A | 2957 | 0.09  |
| 1.008  | ; qtot -0.09                   |    |     |      |      |       |
| 2958   | HAL2                           | 47 | MAL | H47B | 2958 | 0.09  |
| 1.008  | ; qtot 0                       |    |     |      |      |       |
| 2959   | CTL3                           | 47 | MAL | C48  | 2959 | -0.27 |
| 12.011 | ; qtot -0.27                   |    |     |      |      |       |
| 2960   | HAL3                           | 47 | MAL | H48A | 2960 | 0.09  |
| 1.008  | ; qtot -0.18                   |    |     |      |      |       |
| 2961   | HAL3                           | 47 | MAL | H48B | 2961 | 0.09  |
| 1.008  | ; qtot -0.09                   |    |     |      |      |       |
| 2962   | HAL3                           | 47 | MAL | H48C | 2962 | 0.09  |
| 1.008  | ; qtot 0                       |    |     |      |      |       |
|        | ; residue 48 MAL rtp MAL q 0.0 |    |     |      |      |       |
| 2963   | CT1                            | 48 | MAL | C1   | 2963 | -0.09 |
| 12.011 | ; qtot -0.09                   |    |     |      |      |       |
| 2964   | HB                             | 48 | MAL | H1A  | 2964 | 0.09  |
| 1.008  | ; qtot 0                       |    |     |      |      |       |
| 2965   | C                              | 48 | MAL | C12  | 2965 | 0.51  |
| 12.011 | ; qtot 0.51                    |    |     |      |      |       |
| 2966   | 0                              | 48 | MAL | 012  | 2966 | -0.51 |
| 15.999 | ; qtot 0                       |    |     |      |      |       |
| 2967   | NH1                            | 48 | MAL | N1   | 2967 | -0.47 |
| 14.007 | ; qtot -0.47                   |    |     |      |      |       |
| 2968   | H                              | 48 | MAL | HN1  | 2968 | 0.31  |
| 1.008  | ; qtot -0.16                   |    |     |      |      |       |

|        |              |    |     |      |      |       |
|--------|--------------|----|-----|------|------|-------|
| 2969   | CT2          | 48 | MAL | C13  | 2969 | -0.02 |
| 12.011 | ; qtot -0.18 |    |     |      |      |       |
| 2970   | HB           | 48 | MAL | H13A | 2970 | 0.09  |
| 1.008  | ; qtot -0.09 |    |     |      |      |       |
| 2971   | HB           | 48 | MAL | H13B | 2971 | 0.09  |
| 1.008  | ; qtot 0     |    |     |      |      |       |
| 2972   | CTL2         | 48 | MAL | C14  | 2972 | -0.18 |
| 12.011 | ; qtot -0.18 |    |     |      |      |       |
| 2973   | HAL2         | 48 | MAL | H14A | 2973 | 0.09  |
| 1.008  | ; qtot -0.09 |    |     |      |      |       |
| 2974   | HAL2         | 48 | MAL | H14B | 2974 | 0.09  |
| 1.008  | ; qtot 0     |    |     |      |      |       |
| 2975   | CTL2         | 48 | MAL | C15  | 2975 | -0.1  |
| 12.011 | ; qtot -0.1  |    |     |      |      |       |
| 2976   | HAL2         | 48 | MAL | H15A | 2976 | 0.25  |
| 1.008  | ; qtot 0.15  |    |     |      |      |       |
| 2977   | HAL2         | 48 | MAL | H15B | 2977 | 0.25  |
| 1.008  | ; qtot 0.4   |    |     |      |      |       |
| 2978   | NTL          | 48 | MAL | N2   | 2978 | -0.6  |
| 14.007 | ; qtot -0.2  |    |     |      |      |       |
| 2979   | CTL5         | 48 | MAL | C16  | 2979 | -0.35 |
| 12.011 | ; qtot -0.55 |    |     |      |      |       |
| 2980   | HL           | 48 | MAL | H16A | 2980 | 0.25  |
| 1.008  | ; qtot -0.3  |    |     |      |      |       |
| 2981   | HL           | 48 | MAL | H16B | 2981 | 0.25  |
| 1.008  | ; qtot -0.05 |    |     |      |      |       |
| 2982   | HL           | 48 | MAL | H16C | 2982 | 0.25  |
| 1.008  | ; qtot 0.2   |    |     |      |      |       |
| 2983   | CTL5         | 48 | MAL | C17  | 2983 | -0.35 |
| 12.011 | ; qtot -0.15 |    |     |      |      |       |
| 2984   | HL           | 48 | MAL | H17A | 2984 | 0.25  |
| 1.008  | ; qtot 0.1   |    |     |      |      |       |
| 2985   | HL           | 48 | MAL | H17B | 2985 | 0.25  |
| 1.008  | ; qtot 0.35  |    |     |      |      |       |
| 2986   | HL           | 48 | MAL | H17C | 2986 | 0.25  |
| 1.008  | ; qtot 0.6   |    |     |      |      |       |
| 2987   | CTL5         | 48 | MAL | C18  | 2987 | -0.35 |
| 12.011 | ; qtot 0.25  |    |     |      |      |       |
| 2988   | HL           | 48 | MAL | H18A | 2988 | 0.25  |
| 1.008  | ; qtot 0.5   |    |     |      |      |       |
| 2989   | HL           | 48 | MAL | H18B | 2989 | 0.25  |
| 1.008  | ; qtot 0.75  |    |     |      |      |       |
| 2990   | HL           | 48 | MAL | H18C | 2990 | 0.25  |
| 1.008  | ; qtot 1     |    |     |      |      |       |
| 2991   | CT1          | 48 | MAL | C2   | 2991 | -0.09 |
| 12.011 | ; qtot 0.91  |    |     |      |      |       |
| 2992   | HB           | 48 | MAL | H2   | 2992 | 0.09  |
| 1.008  | ; qtot 1     |    |     |      |      |       |
| 2993   | CC           | 48 | MAL | C21  | 2993 | 0.34  |
| 12.011 | ; qtot 1.34  |    |     |      |      |       |
| 2994   | OC           | 48 | MAL | O21  | 2994 | -0.67 |
| 15.999 | ; qtot 0.67  |    |     |      |      |       |
| 2995   | OC           | 48 | MAL | O22  | 2995 | -0.67 |
| 15.999 | ; qtot 0     |    |     |      |      |       |



|        |        |       |     |      |      |       |
|--------|--------|-------|-----|------|------|-------|
| 2996   | CTL2   | 48    | MAL | C3   | 2996 | -0.18 |
| 12.011 | ; qtot | -0.18 |     |      |      |       |
| 2997   | HAL2   | 48    | MAL | H3A  | 2997 | 0.09  |
| 1.008  | ; qtot | -0.09 |     |      |      |       |
| 2998   | HAL2   | 48    | MAL | H3B  | 2998 | 0.09  |
| 1.008  | ; qtot | 0     |     |      |      |       |
| 2999   | CTL1   | 48    | MAL | C4   | 2999 | -0.09 |
| 12.011 | ; qtot | -0.09 |     |      |      |       |
| 3000   | HAL1   | 48    | MAL | H4A  | 3000 | 0.09  |
| 1.008  | ; qtot | 0     |     |      |      |       |
| 3001   | CTL2   | 48    | MAL | C41  | 3001 | -0.18 |
| 12.011 | ; qtot | -0.18 |     |      |      |       |
| 3002   | HAL2   | 48    | MAL | H41A | 3002 | 0.09  |
| 1.008  | ; qtot | -0.09 |     |      |      |       |
| 3003   | HAL2   | 48    | MAL | H41B | 3003 | 0.09  |
| 1.008  | ; qtot | 0     |     |      |      |       |
| 3004   | CTL2   | 48    | MAL | C42  | 3004 | -0.18 |
| 12.011 | ; qtot | -0.18 |     |      |      |       |
| 3005   | HAL2   | 48    | MAL | H42A | 3005 | 0.09  |
| 1.008  | ; qtot | -0.09 |     |      |      |       |
| 3006   | HAL2   | 48    | MAL | H42B | 3006 | 0.09  |
| 1.008  | ; qtot | 0     |     |      |      |       |
| 3007   | CTL2   | 48    | MAL | C43  | 3007 | -0.18 |
| 12.011 | ; qtot | -0.18 |     |      |      |       |
| 3008   | HAL2   | 48    | MAL | H43A | 3008 | 0.09  |
| 1.008  | ; qtot | -0.09 |     |      |      |       |
| 3009   | HAL2   | 48    | MAL | H43B | 3009 | 0.09  |
| 1.008  | ; qtot | 0     |     |      |      |       |
| 3010   | CTL2   | 48    | MAL | C44  | 3010 | -0.18 |
| 12.011 | ; qtot | -0.18 |     |      |      |       |
| 3011   | HAL2   | 48    | MAL | H44A | 3011 | 0.09  |
| 1.008  | ; qtot | -0.09 |     |      |      |       |
| 3012   | HAL2   | 48    | MAL | H44B | 3012 | 0.09  |
| 1.008  | ; qtot | 0     |     |      |      |       |
| 3013   | CTL2   | 48    | MAL | C45  | 3013 | -0.18 |
| 12.011 | ; qtot | -0.18 |     |      |      |       |
| 3014   | HAL2   | 48    | MAL | H45A | 3014 | 0.09  |
| 1.008  | ; qtot | -0.09 |     |      |      |       |
| 3015   | HAL2   | 48    | MAL | H45B | 3015 | 0.09  |
| 1.008  | ; qtot | 0     |     |      |      |       |
| 3016   | CTL2   | 48    | MAL | C46  | 3016 | -0.18 |
| 12.011 | ; qtot | -0.18 |     |      |      |       |
| 3017   | HAL2   | 48    | MAL | H46A | 3017 | 0.09  |
| 1.008  | ; qtot | -0.09 |     |      |      |       |
| 3018   | HAL2   | 48    | MAL | H46B | 3018 | 0.09  |
| 1.008  | ; qtot | 0     |     |      |      |       |
| 3019   | CTL2   | 48    | MAL | C47  | 3019 | -0.18 |
| 12.011 | ; qtot | -0.18 |     |      |      |       |
| 3020   | HAL2   | 48    | MAL | H47A | 3020 | 0.09  |
| 1.008  | ; qtot | -0.09 |     |      |      |       |
| 3021   | HAL2   | 48    | MAL | H47B | 3021 | 0.09  |
| 1.008  | ; qtot | 0     |     |      |      |       |
| 3022   | CTL3   | 48    | MAL | C48  | 3022 | -0.27 |
| 12.011 | ; qtot | -0.27 |     |      |      |       |

|                                |              |    |     |      |      |       |
|--------------------------------|--------------|----|-----|------|------|-------|
| 3023                           | HAL3         | 48 | MAL | H48A | 3023 | 0.09  |
| 1.008                          | ; qtot -0.18 |    |     |      |      |       |
| 3024                           | HAL3         | 48 | MAL | H48B | 3024 | 0.09  |
| 1.008                          | ; qtot -0.09 |    |     |      |      |       |
| 3025                           | HAL3         | 48 | MAL | H48C | 3025 | 0.09  |
| 1.008                          | ; qtot 0     |    |     |      |      |       |
| ; residue 49 MAL rtp MAL q 0.0 |              |    |     |      |      |       |
| 3026                           | CT1          | 49 | MAL | C1   | 3026 | -0.09 |
| 12.011                         | ; qtot -0.09 |    |     |      |      |       |
| 3027                           | HB           | 49 | MAL | H1A  | 3027 | 0.09  |
| 1.008                          | ; qtot 0     |    |     |      |      |       |
| 3028                           | C            | 49 | MAL | C12  | 3028 | 0.51  |
| 12.011                         | ; qtot 0.51  |    |     |      |      |       |
| 3029                           | 0            | 49 | MAL | 012  | 3029 | -0.51 |
| 15.999                         | ; qtot 0     |    |     |      |      |       |
| 3030                           | NH1          | 49 | MAL | N1   | 3030 | -0.47 |
| 14.007                         | ; qtot -0.47 |    |     |      |      |       |
| 3031                           | H            | 49 | MAL | HN1  | 3031 | 0.31  |
| 1.008                          | ; qtot -0.16 |    |     |      |      |       |
| 3032                           | CT2          | 49 | MAL | C13  | 3032 | -0.02 |
| 12.011                         | ; qtot -0.18 |    |     |      |      |       |
| 3033                           | HB           | 49 | MAL | H13A | 3033 | 0.09  |
| 1.008                          | ; qtot -0.09 |    |     |      |      |       |
| 3034                           | HB           | 49 | MAL | H13B | 3034 | 0.09  |
| 1.008                          | ; qtot 0     |    |     |      |      |       |
| 3035                           | CTL2         | 49 | MAL | C14  | 3035 | -0.18 |
| 12.011                         | ; qtot -0.18 |    |     |      |      |       |
| 3036                           | HAL2         | 49 | MAL | H14A | 3036 | 0.09  |
| 1.008                          | ; qtot -0.09 |    |     |      |      |       |
| 3037                           | HAL2         | 49 | MAL | H14B | 3037 | 0.09  |
| 1.008                          | ; qtot 0     |    |     |      |      |       |
| 3038                           | CTL2         | 49 | MAL | C15  | 3038 | -0.1  |
| 12.011                         | ; qtot -0.1  |    |     |      |      |       |
| 3039                           | HAL2         | 49 | MAL | H15A | 3039 | 0.25  |
| 1.008                          | ; qtot 0.15  |    |     |      |      |       |
| 3040                           | HAL2         | 49 | MAL | H15B | 3040 | 0.25  |
| 1.008                          | ; qtot 0.4   |    |     |      |      |       |
| 3041                           | NTL          | 49 | MAL | N2   | 3041 | -0.6  |
| 14.007                         | ; qtot -0.2  |    |     |      |      |       |
| 3042                           | CTL5         | 49 | MAL | C16  | 3042 | -0.35 |
| 12.011                         | ; qtot -0.55 |    |     |      |      |       |
| 3043                           | HL           | 49 | MAL | H16A | 3043 | 0.25  |
| 1.008                          | ; qtot -0.3  |    |     |      |      |       |
| 3044                           | HL           | 49 | MAL | H16B | 3044 | 0.25  |
| 1.008                          | ; qtot -0.05 |    |     |      |      |       |
| 3045                           | HL           | 49 | MAL | H16C | 3045 | 0.25  |
| 1.008                          | ; qtot 0.2   |    |     |      |      |       |
| 3046                           | CTL5         | 49 | MAL | C17  | 3046 | -0.35 |
| 12.011                         | ; qtot -0.15 |    |     |      |      |       |
| 3047                           | HL           | 49 | MAL | H17A | 3047 | 0.25  |
| 1.008                          | ; qtot 0.1   |    |     |      |      |       |
| 3048                           | HL           | 49 | MAL | H17B | 3048 | 0.25  |
| 1.008                          | ; qtot 0.35  |    |     |      |      |       |
| 3049                           | HL           | 49 | MAL | H17C | 3049 | 0.25  |

|        |              |    |     |      |      |       |  |
|--------|--------------|----|-----|------|------|-------|--|
| 1.008  | ; qtot 0.6   |    |     |      |      |       |  |
| 3050   | CTL5         | 49 | MAL | C18  | 3050 | -0.35 |  |
| 12.011 | ; qtot 0.25  |    |     |      |      |       |  |
| 3051   | HL           | 49 | MAL | H18A | 3051 | 0.25  |  |
| 1.008  | ; qtot 0.5   |    |     |      |      |       |  |
| 3052   | HL           | 49 | MAL | H18B | 3052 | 0.25  |  |
| 1.008  | ; qtot 0.75  |    |     |      |      |       |  |
| 3053   | HL           | 49 | MAL | H18C | 3053 | 0.25  |  |
| 1.008  | ; qtot 1     |    |     |      |      |       |  |
| 3054   | CT1          | 49 | MAL | C2   | 3054 | -0.09 |  |
| 12.011 | ; qtot 0.91  |    |     |      |      |       |  |
| 3055   | HB           | 49 | MAL | H2   | 3055 | 0.09  |  |
| 1.008  | ; qtot 1     |    |     |      |      |       |  |
| 3056   | CC           | 49 | MAL | C21  | 3056 | 0.34  |  |
| 12.011 | ; qtot 1.34  |    |     |      |      |       |  |
| 3057   | OC           | 49 | MAL | O21  | 3057 | -0.67 |  |
| 15.999 | ; qtot 0.67  |    |     |      |      |       |  |
| 3058   | OC           | 49 | MAL | O22  | 3058 | -0.67 |  |
| 15.999 | ; qtot 0     |    |     |      |      |       |  |
| 3059   | CTL2         | 49 | MAL | C3   | 3059 | -0.18 |  |
| 12.011 | ; qtot -0.18 |    |     |      |      |       |  |
| 3060   | HAL2         | 49 | MAL | H3A  | 3060 | 0.09  |  |
| 1.008  | ; qtot -0.09 |    |     |      |      |       |  |
| 3061   | HAL2         | 49 | MAL | H3B  | 3061 | 0.09  |  |
| 1.008  | ; qtot 0     |    |     |      |      |       |  |
| 3062   | CTL1         | 49 | MAL | C4   | 3062 | -0.09 |  |
| 12.011 | ; qtot -0.09 |    |     |      |      |       |  |
| 3063   | HAL1         | 49 | MAL | H4A  | 3063 | 0.09  |  |
| 1.008  | ; qtot 0     |    |     |      |      |       |  |
| 3064   | CTL2         | 49 | MAL | C41  | 3064 | -0.18 |  |
| 12.011 | ; qtot -0.18 |    |     |      |      |       |  |
| 3065   | HAL2         | 49 | MAL | H41A | 3065 | 0.09  |  |
| 1.008  | ; qtot -0.09 |    |     |      |      |       |  |
| 3066   | HAL2         | 49 | MAL | H41B | 3066 | 0.09  |  |
| 1.008  | ; qtot 0     |    |     |      |      |       |  |
| 3067   | CTL2         | 49 | MAL | C42  | 3067 | -0.18 |  |
| 12.011 | ; qtot -0.18 |    |     |      |      |       |  |
| 3068   | HAL2         | 49 | MAL | H42A | 3068 | 0.09  |  |
| 1.008  | ; qtot -0.09 |    |     |      |      |       |  |
| 3069   | HAL2         | 49 | MAL | H42B | 3069 | 0.09  |  |
| 1.008  | ; qtot 0     |    |     |      |      |       |  |
| 3070   | CTL2         | 49 | MAL | C43  | 3070 | -0.18 |  |
| 12.011 | ; qtot -0.18 |    |     |      |      |       |  |
| 3071   | HAL2         | 49 | MAL | H43A | 3071 | 0.09  |  |
| 1.008  | ; qtot -0.09 |    |     |      |      |       |  |
| 3072   | HAL2         | 49 | MAL | H43B | 3072 | 0.09  |  |
| 1.008  | ; qtot 0     |    |     |      |      |       |  |
| 3073   | CTL2         | 49 | MAL | C44  | 3073 | -0.18 |  |
| 12.011 | ; qtot -0.18 |    |     |      |      |       |  |
| 3074   | HAL2         | 49 | MAL | H44A | 3074 | 0.09  |  |
| 1.008  | ; qtot -0.09 |    |     |      |      |       |  |
| 3075   | HAL2         | 49 | MAL | H44B | 3075 | 0.09  |  |
| 1.008  | ; qtot 0     |    |     |      |      |       |  |
| 3076   | CTL2         | 49 | MAL | C45  | 3076 | -0.18 |  |

|        |                                |    |     |      |      |       |  |
|--------|--------------------------------|----|-----|------|------|-------|--|
| 12.011 | ; qtot -0.18                   |    |     |      |      |       |  |
| 3077   | HAL2                           | 49 | MAL | H45A | 3077 | 0.09  |  |
| 1.008  | ; qtot -0.09                   |    |     |      |      |       |  |
| 3078   | HAL2                           | 49 | MAL | H45B | 3078 | 0.09  |  |
| 1.008  | ; qtot 0                       |    |     |      |      |       |  |
| 3079   | CTL2                           | 49 | MAL | C46  | 3079 | -0.18 |  |
| 12.011 | ; qtot -0.18                   |    |     |      |      |       |  |
| 3080   | HAL2                           | 49 | MAL | H46A | 3080 | 0.09  |  |
| 1.008  | ; qtot -0.09                   |    |     |      |      |       |  |
| 3081   | HAL2                           | 49 | MAL | H46B | 3081 | 0.09  |  |
| 1.008  | ; qtot 0                       |    |     |      |      |       |  |
| 3082   | CTL2                           | 49 | MAL | C47  | 3082 | -0.18 |  |
| 12.011 | ; qtot -0.18                   |    |     |      |      |       |  |
| 3083   | HAL2                           | 49 | MAL | H47A | 3083 | 0.09  |  |
| 1.008  | ; qtot -0.09                   |    |     |      |      |       |  |
| 3084   | HAL2                           | 49 | MAL | H47B | 3084 | 0.09  |  |
| 1.008  | ; qtot 0                       |    |     |      |      |       |  |
| 3085   | CTL3                           | 49 | MAL | C48  | 3085 | -0.27 |  |
| 12.011 | ; qtot -0.27                   |    |     |      |      |       |  |
| 3086   | HAL3                           | 49 | MAL | H48A | 3086 | 0.09  |  |
| 1.008  | ; qtot -0.18                   |    |     |      |      |       |  |
| 3087   | HAL3                           | 49 | MAL | H48B | 3087 | 0.09  |  |
| 1.008  | ; qtot -0.09                   |    |     |      |      |       |  |
| 3088   | HAL3                           | 49 | MAL | H48C | 3088 | 0.09  |  |
| 1.008  | ; qtot 0                       |    |     |      |      |       |  |
|        | ; residue 50 MAL rtp MAL q 0.0 |    |     |      |      |       |  |
| 3089   | CT1                            | 50 | MAL | C1   | 3089 | -0.09 |  |
| 12.011 | ; qtot -0.09                   |    |     |      |      |       |  |
| 3090   | HB                             | 50 | MAL | H1A  | 3090 | 0.09  |  |
| 1.008  | ; qtot 0                       |    |     |      |      |       |  |
| 3091   | C                              | 50 | MAL | C12  | 3091 | 0.51  |  |
| 12.011 | ; qtot 0.51                    |    |     |      |      |       |  |
| 3092   | 0                              | 50 | MAL | 012  | 3092 | -0.51 |  |
| 15.999 | ; qtot 0                       |    |     |      |      |       |  |
| 3093   | NH1                            | 50 | MAL | N1   | 3093 | -0.47 |  |
| 14.007 | ; qtot -0.47                   |    |     |      |      |       |  |
| 3094   | H                              | 50 | MAL | HN1  | 3094 | 0.31  |  |
| 1.008  | ; qtot -0.16                   |    |     |      |      |       |  |
| 3095   | CT2                            | 50 | MAL | C13  | 3095 | -0.02 |  |
| 12.011 | ; qtot -0.18                   |    |     |      |      |       |  |
| 3096   | HB                             | 50 | MAL | H13A | 3096 | 0.09  |  |
| 1.008  | ; qtot -0.09                   |    |     |      |      |       |  |
| 3097   | HB                             | 50 | MAL | H13B | 3097 | 0.09  |  |
| 1.008  | ; qtot 0                       |    |     |      |      |       |  |
| 3098   | CTL2                           | 50 | MAL | C14  | 3098 | -0.18 |  |
| 12.011 | ; qtot -0.18                   |    |     |      |      |       |  |
| 3099   | HAL2                           | 50 | MAL | H14A | 3099 | 0.09  |  |
| 1.008  | ; qtot -0.09                   |    |     |      |      |       |  |
| 3100   | HAL2                           | 50 | MAL | H14B | 3100 | 0.09  |  |
| 1.008  | ; qtot 0                       |    |     |      |      |       |  |
| 3101   | CTL2                           | 50 | MAL | C15  | 3101 | -0.1  |  |
| 12.011 | ; qtot -0.1                    |    |     |      |      |       |  |
| 3102   | HAL2                           | 50 | MAL | H15A | 3102 | 0.25  |  |
| 1.008  | ; qtot 0.15                    |    |     |      |      |       |  |

|        |              |    |     |      |      |       |
|--------|--------------|----|-----|------|------|-------|
| 3103   | HAL2         | 50 | MAL | H15B | 3103 | 0.25  |
| 1.008  | ; qtot 0.4   |    |     |      |      |       |
| 3104   | NTL          | 50 | MAL | N2   | 3104 | -0.6  |
| 14.007 | ; qtot -0.2  |    |     |      |      |       |
| 3105   | CTL5         | 50 | MAL | C16  | 3105 | -0.35 |
| 12.011 | ; qtot -0.55 |    |     |      |      |       |
| 3106   | HL           | 50 | MAL | H16A | 3106 | 0.25  |
| 1.008  | ; qtot -0.3  |    |     |      |      |       |
| 3107   | HL           | 50 | MAL | H16B | 3107 | 0.25  |
| 1.008  | ; qtot -0.05 |    |     |      |      |       |
| 3108   | HL           | 50 | MAL | H16C | 3108 | 0.25  |
| 1.008  | ; qtot 0.2   |    |     |      |      |       |
| 3109   | CTL5         | 50 | MAL | C17  | 3109 | -0.35 |
| 12.011 | ; qtot -0.15 |    |     |      |      |       |
| 3110   | HL           | 50 | MAL | H17A | 3110 | 0.25  |
| 1.008  | ; qtot 0.1   |    |     |      |      |       |
| 3111   | HL           | 50 | MAL | H17B | 3111 | 0.25  |
| 1.008  | ; qtot 0.35  |    |     |      |      |       |
| 3112   | HL           | 50 | MAL | H17C | 3112 | 0.25  |
| 1.008  | ; qtot 0.6   |    |     |      |      |       |
| 3113   | CTL5         | 50 | MAL | C18  | 3113 | -0.35 |
| 12.011 | ; qtot 0.25  |    |     |      |      |       |
| 3114   | HL           | 50 | MAL | H18A | 3114 | 0.25  |
| 1.008  | ; qtot 0.5   |    |     |      |      |       |
| 3115   | HL           | 50 | MAL | H18B | 3115 | 0.25  |
| 1.008  | ; qtot 0.75  |    |     |      |      |       |
| 3116   | HL           | 50 | MAL | H18C | 3116 | 0.25  |
| 1.008  | ; qtot 1     |    |     |      |      |       |
| 3117   | CT1          | 50 | MAL | C2   | 3117 | -0.09 |
| 12.011 | ; qtot 0.91  |    |     |      |      |       |
| 3118   | HB           | 50 | MAL | H2   | 3118 | 0.09  |
| 1.008  | ; qtot 1     |    |     |      |      |       |
| 3119   | CC           | 50 | MAL | C21  | 3119 | 0.34  |
| 12.011 | ; qtot 1.34  |    |     |      |      |       |
| 3120   | OC           | 50 | MAL | O21  | 3120 | -0.67 |
| 15.999 | ; qtot 0.67  |    |     |      |      |       |
| 3121   | OC           | 50 | MAL | O22  | 3121 | -0.67 |
| 15.999 | ; qtot 0     |    |     |      |      |       |
| 3122   | CTL2         | 50 | MAL | C3   | 3122 | -0.18 |
| 12.011 | ; qtot -0.18 |    |     |      |      |       |
| 3123   | HAL2         | 50 | MAL | H3A  | 3123 | 0.09  |
| 1.008  | ; qtot -0.09 |    |     |      |      |       |
| 3124   | HAL2         | 50 | MAL | H3B  | 3124 | 0.09  |
| 1.008  | ; qtot 0     |    |     |      |      |       |
| 3125   | CTL1         | 50 | MAL | C4   | 3125 | -0.09 |
| 12.011 | ; qtot -0.09 |    |     |      |      |       |
| 3126   | HAL1         | 50 | MAL | H4A  | 3126 | 0.09  |
| 1.008  | ; qtot 0     |    |     |      |      |       |
| 3127   | CTL2         | 50 | MAL | C41  | 3127 | -0.18 |
| 12.011 | ; qtot -0.18 |    |     |      |      |       |
| 3128   | HAL2         | 50 | MAL | H41A | 3128 | 0.09  |
| 1.008  | ; qtot -0.09 |    |     |      |      |       |
| 3129   | HAL2         | 50 | MAL | H41B | 3129 | 0.09  |
| 1.008  | ; qtot 0     |    |     |      |      |       |

|           |            |       |     |      |      |       |
|-----------|------------|-------|-----|------|------|-------|
| 3130      | CTL2       | 50    | MAL | C42  | 3130 | -0.18 |
| 12.011    | ; qtot     | -0.18 |     |      |      |       |
| 3131      | HAL2       | 50    | MAL | H42A | 3131 | 0.09  |
| 1.008     | ; qtot     | -0.09 |     |      |      |       |
| 3132      | HAL2       | 50    | MAL | H42B | 3132 | 0.09  |
| 1.008     | ; qtot     | 0     |     |      |      |       |
| 3133      | CTL2       | 50    | MAL | C43  | 3133 | -0.18 |
| 12.011    | ; qtot     | -0.18 |     |      |      |       |
| 3134      | HAL2       | 50    | MAL | H43A | 3134 | 0.09  |
| 1.008     | ; qtot     | -0.09 |     |      |      |       |
| 3135      | HAL2       | 50    | MAL | H43B | 3135 | 0.09  |
| 1.008     | ; qtot     | 0     |     |      |      |       |
| 3136      | CTL2       | 50    | MAL | C44  | 3136 | -0.18 |
| 12.011    | ; qtot     | -0.18 |     |      |      |       |
| 3137      | HAL2       | 50    | MAL | H44A | 3137 | 0.09  |
| 1.008     | ; qtot     | -0.09 |     |      |      |       |
| 3138      | HAL2       | 50    | MAL | H44B | 3138 | 0.09  |
| 1.008     | ; qtot     | 0     |     |      |      |       |
| 3139      | CTL2       | 50    | MAL | C45  | 3139 | -0.18 |
| 12.011    | ; qtot     | -0.18 |     |      |      |       |
| 3140      | HAL2       | 50    | MAL | H45A | 3140 | 0.09  |
| 1.008     | ; qtot     | -0.09 |     |      |      |       |
| 3141      | HAL2       | 50    | MAL | H45B | 3141 | 0.09  |
| 1.008     | ; qtot     | 0     |     |      |      |       |
| 3142      | CTL2       | 50    | MAL | C46  | 3142 | -0.18 |
| 12.011    | ; qtot     | -0.18 |     |      |      |       |
| 3143      | HAL2       | 50    | MAL | H46A | 3143 | 0.09  |
| 1.008     | ; qtot     | -0.09 |     |      |      |       |
| 3144      | HAL2       | 50    | MAL | H46B | 3144 | 0.09  |
| 1.008     | ; qtot     | 0     |     |      |      |       |
| 3145      | CTL2       | 50    | MAL | C47  | 3145 | -0.18 |
| 12.011    | ; qtot     | -0.18 |     |      |      |       |
| 3146      | HAL2       | 50    | MAL | H47A | 3146 | 0.09  |
| 1.008     | ; qtot     | -0.09 |     |      |      |       |
| 3147      | HAL2       | 50    | MAL | H47B | 3147 | 0.09  |
| 1.008     | ; qtot     | 0     |     |      |      |       |
| 3148      | CTL3       | 50    | MAL | C48  | 3148 | -0.27 |
| 12.011    | ; qtot     | -0.27 |     |      |      |       |
| 3149      | HAL3       | 50    | MAL | H48A | 3149 | 0.09  |
| 1.008     | ; qtot     | -0.18 |     |      |      |       |
| 3150      | HAL3       | 50    | MAL | H48B | 3150 | 0.09  |
| 1.008     | ; qtot     | -0.09 |     |      |      |       |
| 3151      | HAL3       | 50    | MAL | H48C | 3151 | 0.09  |
| 1.008     | ; qtot     | 0     |     |      |      |       |
| ; residue | 51 MAL rtp | MAL   | q   | 0.0  |      |       |
| 3152      | CT1        | 51    | MAL | C1   | 3152 | -0.09 |
| 12.011    | ; qtot     | -0.09 |     |      |      |       |
| 3153      | HB         | 51    | MAL | H1A  | 3153 | 0.09  |
| 1.008     | ; qtot     | 0     |     |      |      |       |
| 3154      | C          | 51    | MAL | C12  | 3154 | 0.51  |
| 12.011    | ; qtot     | 0.51  |     |      |      |       |
| 3155      | 0          | 51    | MAL | 012  | 3155 | -0.51 |
| 15.999    | ; qtot     | 0     |     |      |      |       |
| 3156      | NH1        | 51    | MAL | N1   | 3156 | -0.47 |

|        |              |    |     |      |      |       |
|--------|--------------|----|-----|------|------|-------|
| 14.007 | ; qtot -0.47 |    |     |      |      |       |
| 3157   | H            | 51 | MAL | HN1  | 3157 | 0.31  |
| 1.008  | ; qtot -0.16 |    |     |      |      |       |
| 3158   | CT2          | 51 | MAL | C13  | 3158 | -0.02 |
| 12.011 | ; qtot -0.18 |    |     |      |      |       |
| 3159   | HB           | 51 | MAL | H13A | 3159 | 0.09  |
| 1.008  | ; qtot -0.09 |    |     |      |      |       |
| 3160   | HB           | 51 | MAL | H13B | 3160 | 0.09  |
| 1.008  | ; qtot 0     |    |     |      |      |       |
| 3161   | CTL2         | 51 | MAL | C14  | 3161 | -0.18 |
| 12.011 | ; qtot -0.18 |    |     |      |      |       |
| 3162   | HAL2         | 51 | MAL | H14A | 3162 | 0.09  |
| 1.008  | ; qtot -0.09 |    |     |      |      |       |
| 3163   | HAL2         | 51 | MAL | H14B | 3163 | 0.09  |
| 1.008  | ; qtot 0     |    |     |      |      |       |
| 3164   | CTL2         | 51 | MAL | C15  | 3164 | -0.1  |
| 12.011 | ; qtot -0.1  |    |     |      |      |       |
| 3165   | HAL2         | 51 | MAL | H15A | 3165 | 0.25  |
| 1.008  | ; qtot 0.15  |    |     |      |      |       |
| 3166   | HAL2         | 51 | MAL | H15B | 3166 | 0.25  |
| 1.008  | ; qtot 0.4   |    |     |      |      |       |
| 3167   | NTL          | 51 | MAL | N2   | 3167 | -0.6  |
| 14.007 | ; qtot -0.2  |    |     |      |      |       |
| 3168   | CTL5         | 51 | MAL | C16  | 3168 | -0.35 |
| 12.011 | ; qtot -0.55 |    |     |      |      |       |
| 3169   | HL           | 51 | MAL | H16A | 3169 | 0.25  |
| 1.008  | ; qtot -0.3  |    |     |      |      |       |
| 3170   | HL           | 51 | MAL | H16B | 3170 | 0.25  |
| 1.008  | ; qtot -0.05 |    |     |      |      |       |
| 3171   | HL           | 51 | MAL | H16C | 3171 | 0.25  |
| 1.008  | ; qtot 0.2   |    |     |      |      |       |
| 3172   | CTL5         | 51 | MAL | C17  | 3172 | -0.35 |
| 12.011 | ; qtot -0.15 |    |     |      |      |       |
| 3173   | HL           | 51 | MAL | H17A | 3173 | 0.25  |
| 1.008  | ; qtot 0.1   |    |     |      |      |       |
| 3174   | HL           | 51 | MAL | H17B | 3174 | 0.25  |
| 1.008  | ; qtot 0.35  |    |     |      |      |       |
| 3175   | HL           | 51 | MAL | H17C | 3175 | 0.25  |
| 1.008  | ; qtot 0.6   |    |     |      |      |       |
| 3176   | CTL5         | 51 | MAL | C18  | 3176 | -0.35 |
| 12.011 | ; qtot 0.25  |    |     |      |      |       |
| 3177   | HL           | 51 | MAL | H18A | 3177 | 0.25  |
| 1.008  | ; qtot 0.5   |    |     |      |      |       |
| 3178   | HL           | 51 | MAL | H18B | 3178 | 0.25  |
| 1.008  | ; qtot 0.75  |    |     |      |      |       |
| 3179   | HL           | 51 | MAL | H18C | 3179 | 0.25  |
| 1.008  | ; qtot 1     |    |     |      |      |       |
| 3180   | CT1          | 51 | MAL | C2   | 3180 | -0.09 |
| 12.011 | ; qtot 0.91  |    |     |      |      |       |
| 3181   | HB           | 51 | MAL | H2   | 3181 | 0.09  |
| 1.008  | ; qtot 1     |    |     |      |      |       |
| 3182   | CC           | 51 | MAL | C21  | 3182 | 0.34  |
| 12.011 | ; qtot 1.34  |    |     |      |      |       |
| 3183   | OC           | 51 | MAL | O21  | 3183 | -0.67 |

|        |              |    |     |      |      |       |  |
|--------|--------------|----|-----|------|------|-------|--|
| 15.999 | ; qtot 0.67  |    |     |      |      |       |  |
| 3184   | OC           | 51 | MAL | 022  | 3184 | -0.67 |  |
| 15.999 | ; qtot 0     |    |     |      |      |       |  |
| 3185   | CTL2         | 51 | MAL | C3   | 3185 | -0.18 |  |
| 12.011 | ; qtot -0.18 |    |     |      |      |       |  |
| 3186   | HAL2         | 51 | MAL | H3A  | 3186 | 0.09  |  |
| 1.008  | ; qtot -0.09 |    |     |      |      |       |  |
| 3187   | HAL2         | 51 | MAL | H3B  | 3187 | 0.09  |  |
| 1.008  | ; qtot 0     |    |     |      |      |       |  |
| 3188   | CTL1         | 51 | MAL | C4   | 3188 | -0.09 |  |
| 12.011 | ; qtot -0.09 |    |     |      |      |       |  |
| 3189   | HAL1         | 51 | MAL | H4A  | 3189 | 0.09  |  |
| 1.008  | ; qtot 0     |    |     |      |      |       |  |
| 3190   | CTL2         | 51 | MAL | C41  | 3190 | -0.18 |  |
| 12.011 | ; qtot -0.18 |    |     |      |      |       |  |
| 3191   | HAL2         | 51 | MAL | H41A | 3191 | 0.09  |  |
| 1.008  | ; qtot -0.09 |    |     |      |      |       |  |
| 3192   | HAL2         | 51 | MAL | H41B | 3192 | 0.09  |  |
| 1.008  | ; qtot 0     |    |     |      |      |       |  |
| 3193   | CTL2         | 51 | MAL | C42  | 3193 | -0.18 |  |
| 12.011 | ; qtot -0.18 |    |     |      |      |       |  |
| 3194   | HAL2         | 51 | MAL | H42A | 3194 | 0.09  |  |
| 1.008  | ; qtot -0.09 |    |     |      |      |       |  |
| 3195   | HAL2         | 51 | MAL | H42B | 3195 | 0.09  |  |
| 1.008  | ; qtot 0     |    |     |      |      |       |  |
| 3196   | CTL2         | 51 | MAL | C43  | 3196 | -0.18 |  |
| 12.011 | ; qtot -0.18 |    |     |      |      |       |  |
| 3197   | HAL2         | 51 | MAL | H43A | 3197 | 0.09  |  |
| 1.008  | ; qtot -0.09 |    |     |      |      |       |  |
| 3198   | HAL2         | 51 | MAL | H43B | 3198 | 0.09  |  |
| 1.008  | ; qtot 0     |    |     |      |      |       |  |
| 3199   | CTL2         | 51 | MAL | C44  | 3199 | -0.18 |  |
| 12.011 | ; qtot -0.18 |    |     |      |      |       |  |
| 3200   | HAL2         | 51 | MAL | H44A | 3200 | 0.09  |  |
| 1.008  | ; qtot -0.09 |    |     |      |      |       |  |
| 3201   | HAL2         | 51 | MAL | H44B | 3201 | 0.09  |  |
| 1.008  | ; qtot 0     |    |     |      |      |       |  |
| 3202   | CTL2         | 51 | MAL | C45  | 3202 | -0.18 |  |
| 12.011 | ; qtot -0.18 |    |     |      |      |       |  |
| 3203   | HAL2         | 51 | MAL | H45A | 3203 | 0.09  |  |
| 1.008  | ; qtot -0.09 |    |     |      |      |       |  |
| 3204   | HAL2         | 51 | MAL | H45B | 3204 | 0.09  |  |
| 1.008  | ; qtot 0     |    |     |      |      |       |  |
| 3205   | CTL2         | 51 | MAL | C46  | 3205 | -0.18 |  |
| 12.011 | ; qtot -0.18 |    |     |      |      |       |  |
| 3206   | HAL2         | 51 | MAL | H46A | 3206 | 0.09  |  |
| 1.008  | ; qtot -0.09 |    |     |      |      |       |  |
| 3207   | HAL2         | 51 | MAL | H46B | 3207 | 0.09  |  |
| 1.008  | ; qtot 0     |    |     |      |      |       |  |
| 3208   | CTL2         | 51 | MAL | C47  | 3208 | -0.18 |  |
| 12.011 | ; qtot -0.18 |    |     |      |      |       |  |
| 3209   | HAL2         | 51 | MAL | H47A | 3209 | 0.09  |  |
| 1.008  | ; qtot -0.09 |    |     |      |      |       |  |
| 3210   | HAL2         | 51 | MAL | H47B | 3210 | 0.09  |  |



|                                  |              |    |      |      |      |       |  |
|----------------------------------|--------------|----|------|------|------|-------|--|
| 1.008                            | ; qtot 0     |    |      |      |      |       |  |
| 3211                             | CTL3         | 51 | MAL  | C48  | 3211 | -0.27 |  |
| 12.011                           | ; qtot -0.27 |    |      |      |      |       |  |
| 3212                             | HAL3         | 51 | MAL  | H48A | 3212 | 0.09  |  |
| 1.008                            | ; qtot -0.18 |    |      |      |      |       |  |
| 3213                             | HAL3         | 51 | MAL  | H48B | 3213 | 0.09  |  |
| 1.008                            | ; qtot -0.09 |    |      |      |      |       |  |
| 3214                             | HAL3         | 51 | MAL  | H48C | 3214 | 0.09  |  |
| 1.008                            | ; qtot 0     |    |      |      |      |       |  |
| ; residue 52 MALT rtp MALT q 0.0 |              |    |      |      |      |       |  |
| 3215                             | CT1          | 52 | MALT | C1   | 3215 | -0.09 |  |
| 12.011                           | ; qtot -0.09 |    |      |      |      |       |  |
| 3216                             | HB           | 52 | MALT | H1A  | 3216 | 0.09  |  |
| 1.008                            | ; qtot 0     |    |      |      |      |       |  |
| 3217                             | C            | 52 | MALT | C12  | 3217 | 0.51  |  |
| 12.011                           | ; qtot 0.51  |    |      |      |      |       |  |
| 3218                             | 0            | 52 | MALT | 012  | 3218 | -0.51 |  |
| 15.999                           | ; qtot 0     |    |      |      |      |       |  |
| 3219                             | NH1          | 52 | MALT | N1   | 3219 | -0.47 |  |
| 14.007                           | ; qtot -0.47 |    |      |      |      |       |  |
| 3220                             | H            | 52 | MALT | HN1  | 3220 | 0.31  |  |
| 1.008                            | ; qtot -0.16 |    |      |      |      |       |  |
| 3221                             | CT2          | 52 | MALT | C13  | 3221 | -0.02 |  |
| 12.011                           | ; qtot -0.18 |    |      |      |      |       |  |
| 3222                             | HB           | 52 | MALT | H13A | 3222 | 0.09  |  |
| 1.008                            | ; qtot -0.09 |    |      |      |      |       |  |
| 3223                             | HB           | 52 | MALT | H13B | 3223 | 0.09  |  |
| 1.008                            | ; qtot 0     |    |      |      |      |       |  |
| 3224                             | CTL2         | 52 | MALT | C14  | 3224 | -0.18 |  |
| 12.011                           | ; qtot -0.18 |    |      |      |      |       |  |
| 3225                             | HAL2         | 52 | MALT | H14A | 3225 | 0.09  |  |
| 1.008                            | ; qtot -0.09 |    |      |      |      |       |  |
| 3226                             | HAL2         | 52 | MALT | H14B | 3226 | 0.09  |  |
| 1.008                            | ; qtot 0     |    |      |      |      |       |  |
| 3227                             | CTL2         | 52 | MALT | C15  | 3227 | -0.1  |  |
| 12.011                           | ; qtot -0.1  |    |      |      |      |       |  |
| 3228                             | HAL2         | 52 | MALT | H15A | 3228 | 0.25  |  |
| 1.008                            | ; qtot 0.15  |    |      |      |      |       |  |
| 3229                             | HAL2         | 52 | MALT | H15B | 3229 | 0.25  |  |
| 1.008                            | ; qtot 0.4   |    |      |      |      |       |  |
| 3230                             | NTL          | 52 | MALT | N2   | 3230 | -0.6  |  |
| 14.007                           | ; qtot -0.2  |    |      |      |      |       |  |
| 3231                             | CTL5         | 52 | MALT | C16  | 3231 | -0.35 |  |
| 12.011                           | ; qtot -0.55 |    |      |      |      |       |  |
| 3232                             | HL           | 52 | MALT | H16A | 3232 | 0.25  |  |
| 1.008                            | ; qtot -0.3  |    |      |      |      |       |  |
| 3233                             | HL           | 52 | MALT | H16B | 3233 | 0.25  |  |
| 1.008                            | ; qtot -0.05 |    |      |      |      |       |  |
| 3234                             | HL           | 52 | MALT | H16C | 3234 | 0.25  |  |
| 1.008                            | ; qtot 0.2   |    |      |      |      |       |  |
| 3235                             | CTL5         | 52 | MALT | C17  | 3235 | -0.35 |  |
| 12.011                           | ; qtot -0.15 |    |      |      |      |       |  |
| 3236                             | HL           | 52 | MALT | H17A | 3236 | 0.25  |  |
| 1.008                            | ; qtot 0.1   |    |      |      |      |       |  |

|        |              |    |      |      |      |       |
|--------|--------------|----|------|------|------|-------|
| 3237   | HL           | 52 | MALT | H17B | 3237 | 0.25  |
| 1.008  | ; qtot 0.35  |    |      |      |      |       |
| 3238   | HL           | 52 | MALT | H17C | 3238 | 0.25  |
| 1.008  | ; qtot 0.6   |    |      |      |      |       |
| 3239   | CTL5         | 52 | MALT | C18  | 3239 | -0.35 |
| 12.011 | ; qtot 0.25  |    |      |      |      |       |
| 3240   | HL           | 52 | MALT | H18A | 3240 | 0.25  |
| 1.008  | ; qtot 0.5   |    |      |      |      |       |
| 3241   | HL           | 52 | MALT | H18B | 3241 | 0.25  |
| 1.008  | ; qtot 0.75  |    |      |      |      |       |
| 3242   | HL           | 52 | MALT | H18C | 3242 | 0.25  |
| 1.008  | ; qtot 1     |    |      |      |      |       |
| 3243   | CT1          | 52 | MALT | C2   | 3243 | -0.09 |
| 12.011 | ; qtot 0.91  |    |      |      |      |       |
| 3244   | HB           | 52 | MALT | H2   | 3244 | 0.09  |
| 1.008  | ; qtot 1     |    |      |      |      |       |
| 3245   | CC           | 52 | MALT | C21  | 3245 | 0.34  |
| 12.011 | ; qtot 1.34  |    |      |      |      |       |
| 3246   | OC           | 52 | MALT | 021  | 3246 | -0.67 |
| 15.999 | ; qtot 0.67  |    |      |      |      |       |
| 3247   | OC           | 52 | MALT | 022  | 3247 | -0.67 |
| 15.999 | ; qtot 0     |    |      |      |      |       |
| 3248   | CTL2         | 52 | MALT | C3   | 3248 | -0.18 |
| 12.011 | ; qtot -0.18 |    |      |      |      |       |
| 3249   | HAL2         | 52 | MALT | H3A  | 3249 | 0.09  |
| 1.008  | ; qtot -0.09 |    |      |      |      |       |
| 3250   | HAL2         | 52 | MALT | H3B  | 3250 | 0.09  |
| 1.008  | ; qtot 0     |    |      |      |      |       |
| 3251   | CTL2         | 52 | MALT | C4   | 3251 | -0.18 |
| 12.011 | ; qtot -0.18 |    |      |      |      |       |
| 3252   | HAL2         | 52 | MALT | H4A  | 3252 | 0.09  |
| 1.008  | ; qtot -0.09 |    |      |      |      |       |
| 3253   | HAL2         | 52 | MALT | H4B  | 3253 | 0.09  |
| 1.008  | ; qtot 0     |    |      |      |      |       |
| 3254   | CTL2         | 52 | MALT | C41  | 3254 | -0.18 |
| 12.011 | ; qtot -0.18 |    |      |      |      |       |
| 3255   | HAL2         | 52 | MALT | H41A | 3255 | 0.09  |
| 1.008  | ; qtot -0.09 |    |      |      |      |       |
| 3256   | HAL2         | 52 | MALT | H41B | 3256 | 0.09  |
| 1.008  | ; qtot 0     |    |      |      |      |       |
| 3257   | CTL2         | 52 | MALT | C42  | 3257 | -0.18 |
| 12.011 | ; qtot -0.18 |    |      |      |      |       |
| 3258   | HAL2         | 52 | MALT | H42A | 3258 | 0.09  |
| 1.008  | ; qtot -0.09 |    |      |      |      |       |
| 3259   | HAL2         | 52 | MALT | H42B | 3259 | 0.09  |
| 1.008  | ; qtot 0     |    |      |      |      |       |
| 3260   | CTL2         | 52 | MALT | C43  | 3260 | -0.18 |
| 12.011 | ; qtot -0.18 |    |      |      |      |       |
| 3261   | HAL2         | 52 | MALT | H43A | 3261 | 0.09  |
| 1.008  | ; qtot -0.09 |    |      |      |      |       |
| 3262   | HAL2         | 52 | MALT | H43B | 3262 | 0.09  |
| 1.008  | ; qtot 0     |    |      |      |      |       |
| 3263   | CTL2         | 52 | MALT | C44  | 3263 | -0.18 |
| 12.011 | ; qtot -0.18 |    |      |      |      |       |

|        |              |    |      |      |      |       |
|--------|--------------|----|------|------|------|-------|
| 3264   | HAL2         | 52 | MALT | H44A | 3264 | 0.09  |
| 1.008  | ; qtot -0.09 |    |      |      |      |       |
| 3265   | HAL2         | 52 | MALT | H44B | 3265 | 0.09  |
| 1.008  | ; qtot 0     |    |      |      |      |       |
| 3266   | CTL2         | 52 | MALT | C45  | 3266 | -0.18 |
| 12.011 | ; qtot -0.18 |    |      |      |      |       |
| 3267   | HAL2         | 52 | MALT | H45A | 3267 | 0.09  |
| 1.008  | ; qtot -0.09 |    |      |      |      |       |
| 3268   | HAL2         | 52 | MALT | H45B | 3268 | 0.09  |
| 1.008  | ; qtot 0     |    |      |      |      |       |
| 3269   | CTL2         | 52 | MALT | C46  | 3269 | -0.18 |
| 12.011 | ; qtot -0.18 |    |      |      |      |       |
| 3270   | HAL2         | 52 | MALT | H46A | 3270 | 0.09  |
| 1.008  | ; qtot -0.09 |    |      |      |      |       |
| 3271   | HAL2         | 52 | MALT | H46B | 3271 | 0.09  |
| 1.008  | ; qtot 0     |    |      |      |      |       |
| 3272   | CTL2         | 52 | MALT | C47  | 3272 | -0.18 |
| 12.011 | ; qtot -0.18 |    |      |      |      |       |
| 3273   | HAL2         | 52 | MALT | H47A | 3273 | 0.09  |
| 1.008  | ; qtot -0.09 |    |      |      |      |       |
| 3274   | HAL2         | 52 | MALT | H47B | 3274 | 0.09  |
| 1.008  | ; qtot 0     |    |      |      |      |       |
| 3275   | CTL3         | 52 | MALT | C48  | 3275 | -0.27 |
| 12.011 | ; qtot -0.27 |    |      |      |      |       |
| 3276   | HAL3         | 52 | MALT | H48A | 3276 | 0.09  |
| 1.008  | ; qtot -0.18 |    |      |      |      |       |
| 3277   | HAL3         | 52 | MALT | H48B | 3277 | 0.09  |
| 1.008  | ; qtot -0.09 |    |      |      |      |       |
| 3278   | HAL3         | 52 | MALT | H48C | 3278 | 0.09  |
| 1.008  | ; qtot 0     |    |      |      |      |       |

[ bonds ]

|    | ai | aj | funct | c0 | c1 | c2 |
|----|----|----|-------|----|----|----|
| c3 |    |    |       |    |    |    |
|    | 1  | 2  | 1     |    |    |    |
|    | 1  | 3  | 1     |    |    |    |
|    | 1  | 4  | 1     |    |    |    |
|    | 1  | 30 | 1     |    |    |    |
|    | 4  | 5  | 1     |    |    |    |
|    | 4  | 6  | 1     |    |    |    |
|    | 6  | 7  | 1     |    |    |    |
|    | 6  | 8  | 1     |    |    |    |
|    | 8  | 9  | 1     |    |    |    |
|    | 8  | 10 | 1     |    |    |    |
|    | 8  | 11 | 1     |    |    |    |
|    | 11 | 12 | 1     |    |    |    |
|    | 11 | 13 | 1     |    |    |    |
|    | 11 | 14 | 1     |    |    |    |
|    | 14 | 15 | 1     |    |    |    |
|    | 14 | 16 | 1     |    |    |    |
|    | 14 | 17 | 1     |    |    |    |
|    | 17 | 18 | 1     |    |    |    |
|    | 17 | 22 | 1     |    |    |    |
|    | 17 | 26 | 1     |    |    |    |

|    |    |   |
|----|----|---|
| 18 | 19 | 1 |
| 18 | 20 | 1 |
| 18 | 21 | 1 |
| 22 | 23 | 1 |
| 22 | 24 | 1 |
| 22 | 25 | 1 |
| 26 | 27 | 1 |
| 26 | 28 | 1 |
| 26 | 29 | 1 |
| 30 | 31 | 1 |
| 30 | 32 | 1 |
| 30 | 35 | 1 |
| 32 | 33 | 1 |
| 32 | 34 | 1 |
| 35 | 36 | 1 |
| 35 | 37 | 1 |
| 35 | 38 | 1 |
| 38 | 39 | 1 |
| 38 | 40 | 1 |
| 38 | 65 | 1 |
| 40 | 41 | 1 |
| 40 | 42 | 1 |
| 40 | 43 | 1 |
| 43 | 44 | 1 |
| 43 | 45 | 1 |
| 43 | 46 | 1 |
| 46 | 47 | 1 |
| 46 | 48 | 1 |
| 46 | 49 | 1 |
| 49 | 50 | 1 |
| 49 | 51 | 1 |
| 49 | 52 | 1 |
| 52 | 53 | 1 |
| 52 | 54 | 1 |
| 52 | 55 | 1 |
| 55 | 56 | 1 |
| 55 | 57 | 1 |
| 55 | 58 | 1 |
| 58 | 59 | 1 |
| 58 | 60 | 1 |
| 58 | 61 | 1 |
| 61 | 62 | 1 |
| 61 | 63 | 1 |
| 61 | 64 | 1 |
| 65 | 66 | 1 |
| 65 | 67 | 1 |
| 65 | 93 | 1 |
| 67 | 68 | 1 |
| 67 | 69 | 1 |
| 69 | 70 | 1 |
| 69 | 71 | 1 |
| 71 | 72 | 1 |
| 71 | 73 | 1 |
| 71 | 74 | 1 |

|     |     |   |
|-----|-----|---|
| 74  | 75  | 1 |
| 74  | 76  | 1 |
| 74  | 77  | 1 |
| 77  | 78  | 1 |
| 77  | 79  | 1 |
| 77  | 80  | 1 |
| 80  | 81  | 1 |
| 80  | 85  | 1 |
| 80  | 89  | 1 |
| 81  | 82  | 1 |
| 81  | 83  | 1 |
| 81  | 84  | 1 |
| 85  | 86  | 1 |
| 85  | 87  | 1 |
| 85  | 88  | 1 |
| 89  | 90  | 1 |
| 89  | 91  | 1 |
| 89  | 92  | 1 |
| 93  | 94  | 1 |
| 93  | 95  | 1 |
| 93  | 98  | 1 |
| 95  | 96  | 1 |
| 95  | 97  | 1 |
| 98  | 99  | 1 |
| 98  | 100 | 1 |
| 98  | 101 | 1 |
| 101 | 102 | 1 |
| 101 | 103 | 1 |
| 101 | 128 | 1 |
| 103 | 104 | 1 |
| 103 | 105 | 1 |
| 103 | 106 | 1 |
| 106 | 107 | 1 |
| 106 | 108 | 1 |
| 106 | 109 | 1 |
| 109 | 110 | 1 |
| 109 | 111 | 1 |
| 109 | 112 | 1 |
| 112 | 113 | 1 |
| 112 | 114 | 1 |
| 112 | 115 | 1 |
| 115 | 116 | 1 |
| 115 | 117 | 1 |
| 115 | 118 | 1 |
| 118 | 119 | 1 |
| 118 | 120 | 1 |
| 118 | 121 | 1 |
| 121 | 122 | 1 |
| 121 | 123 | 1 |
| 121 | 124 | 1 |
| 124 | 125 | 1 |
| 124 | 126 | 1 |
| 124 | 127 | 1 |
| 128 | 129 | 1 |

|     |     |   |
|-----|-----|---|
| 128 | 130 | 1 |
| 128 | 156 | 1 |
| 130 | 131 | 1 |
| 130 | 132 | 1 |
| 132 | 133 | 1 |
| 132 | 134 | 1 |
| 134 | 135 | 1 |
| 134 | 136 | 1 |
| 134 | 137 | 1 |
| 137 | 138 | 1 |
| 137 | 139 | 1 |
| 137 | 140 | 1 |
| 140 | 141 | 1 |
| 140 | 142 | 1 |
| 140 | 143 | 1 |
| 143 | 144 | 1 |
| 143 | 148 | 1 |
| 143 | 152 | 1 |
| 144 | 145 | 1 |
| 144 | 146 | 1 |
| 144 | 147 | 1 |
| 148 | 149 | 1 |
| 148 | 150 | 1 |
| 148 | 151 | 1 |
| 152 | 153 | 1 |
| 152 | 154 | 1 |
| 152 | 155 | 1 |
| 156 | 157 | 1 |
| 156 | 158 | 1 |
| 156 | 161 | 1 |
| 158 | 159 | 1 |
| 158 | 160 | 1 |
| 161 | 162 | 1 |
| 161 | 163 | 1 |
| 161 | 164 | 1 |
| 164 | 165 | 1 |
| 164 | 166 | 1 |
| 164 | 191 | 1 |
| 166 | 167 | 1 |
| 166 | 168 | 1 |
| 166 | 169 | 1 |
| 169 | 170 | 1 |
| 169 | 171 | 1 |
| 169 | 172 | 1 |
| 172 | 173 | 1 |
| 172 | 174 | 1 |
| 172 | 175 | 1 |
| 175 | 176 | 1 |
| 175 | 177 | 1 |
| 175 | 178 | 1 |
| 178 | 179 | 1 |
| 178 | 180 | 1 |
| 178 | 181 | 1 |
| 181 | 182 | 1 |

|     |     |   |
|-----|-----|---|
| 181 | 183 | 1 |
| 181 | 184 | 1 |
| 184 | 185 | 1 |
| 184 | 186 | 1 |
| 184 | 187 | 1 |
| 187 | 188 | 1 |
| 187 | 189 | 1 |
| 187 | 190 | 1 |
| 191 | 192 | 1 |
| 191 | 193 | 1 |
| 191 | 219 | 1 |
| 193 | 194 | 1 |
| 193 | 195 | 1 |
| 195 | 196 | 1 |
| 195 | 197 | 1 |
| 197 | 198 | 1 |
| 197 | 199 | 1 |
| 197 | 200 | 1 |
| 200 | 201 | 1 |
| 200 | 202 | 1 |
| 200 | 203 | 1 |
| 203 | 204 | 1 |
| 203 | 205 | 1 |
| 203 | 206 | 1 |
| 206 | 207 | 1 |
| 206 | 211 | 1 |
| 206 | 215 | 1 |
| 207 | 208 | 1 |
| 207 | 209 | 1 |
| 207 | 210 | 1 |
| 211 | 212 | 1 |
| 211 | 213 | 1 |
| 211 | 214 | 1 |
| 215 | 216 | 1 |
| 215 | 217 | 1 |
| 215 | 218 | 1 |
| 219 | 220 | 1 |
| 219 | 221 | 1 |
| 219 | 224 | 1 |
| 221 | 222 | 1 |
| 221 | 223 | 1 |
| 224 | 225 | 1 |
| 224 | 226 | 1 |
| 224 | 227 | 1 |
| 227 | 228 | 1 |
| 227 | 229 | 1 |
| 227 | 254 | 1 |
| 229 | 230 | 1 |
| 229 | 231 | 1 |
| 229 | 232 | 1 |
| 232 | 233 | 1 |
| 232 | 234 | 1 |
| 232 | 235 | 1 |
| 235 | 236 | 1 |

|     |     |   |
|-----|-----|---|
| 235 | 237 | 1 |
| 235 | 238 | 1 |
| 238 | 239 | 1 |
| 238 | 240 | 1 |
| 238 | 241 | 1 |
| 241 | 242 | 1 |
| 241 | 243 | 1 |
| 241 | 244 | 1 |
| 244 | 245 | 1 |
| 244 | 246 | 1 |
| 244 | 247 | 1 |
| 247 | 248 | 1 |
| 247 | 249 | 1 |
| 247 | 250 | 1 |
| 250 | 251 | 1 |
| 250 | 252 | 1 |
| 250 | 253 | 1 |
| 254 | 255 | 1 |
| 254 | 256 | 1 |
| 254 | 282 | 1 |
| 256 | 257 | 1 |
| 256 | 258 | 1 |
| 258 | 259 | 1 |
| 258 | 260 | 1 |
| 260 | 261 | 1 |
| 260 | 262 | 1 |
| 260 | 263 | 1 |
| 263 | 264 | 1 |
| 263 | 265 | 1 |
| 263 | 266 | 1 |
| 266 | 267 | 1 |
| 266 | 268 | 1 |
| 266 | 269 | 1 |
| 269 | 270 | 1 |
| 269 | 274 | 1 |
| 269 | 278 | 1 |
| 270 | 271 | 1 |
| 270 | 272 | 1 |
| 270 | 273 | 1 |
| 274 | 275 | 1 |
| 274 | 276 | 1 |
| 274 | 277 | 1 |
| 278 | 279 | 1 |
| 278 | 280 | 1 |
| 278 | 281 | 1 |
| 282 | 283 | 1 |
| 282 | 284 | 1 |
| 282 | 287 | 1 |
| 284 | 285 | 1 |
| 284 | 286 | 1 |
| 287 | 288 | 1 |
| 287 | 289 | 1 |
| 287 | 290 | 1 |
| 290 | 291 | 1 |



|     |     |   |
|-----|-----|---|
| 290 | 292 | 1 |
| 290 | 317 | 1 |
| 292 | 293 | 1 |
| 292 | 294 | 1 |
| 292 | 295 | 1 |
| 295 | 296 | 1 |
| 295 | 297 | 1 |
| 295 | 298 | 1 |
| 298 | 299 | 1 |
| 298 | 300 | 1 |
| 298 | 301 | 1 |
| 301 | 302 | 1 |
| 301 | 303 | 1 |
| 301 | 304 | 1 |
| 304 | 305 | 1 |
| 304 | 306 | 1 |
| 304 | 307 | 1 |
| 307 | 308 | 1 |
| 307 | 309 | 1 |
| 307 | 310 | 1 |
| 310 | 311 | 1 |
| 310 | 312 | 1 |
| 310 | 313 | 1 |
| 313 | 314 | 1 |
| 313 | 315 | 1 |
| 313 | 316 | 1 |
| 317 | 318 | 1 |
| 317 | 319 | 1 |
| 317 | 345 | 1 |
| 319 | 320 | 1 |
| 319 | 321 | 1 |
| 321 | 322 | 1 |
| 321 | 323 | 1 |
| 323 | 324 | 1 |
| 323 | 325 | 1 |
| 323 | 326 | 1 |
| 326 | 327 | 1 |
| 326 | 328 | 1 |
| 326 | 329 | 1 |
| 329 | 330 | 1 |
| 329 | 331 | 1 |
| 329 | 332 | 1 |
| 332 | 333 | 1 |
| 332 | 337 | 1 |
| 332 | 341 | 1 |
| 333 | 334 | 1 |
| 333 | 335 | 1 |
| 333 | 336 | 1 |
| 337 | 338 | 1 |
| 337 | 339 | 1 |
| 337 | 340 | 1 |
| 341 | 342 | 1 |
| 341 | 343 | 1 |
| 341 | 344 | 1 |

|     |     |   |
|-----|-----|---|
| 345 | 346 | 1 |
| 345 | 347 | 1 |
| 345 | 350 | 1 |
| 347 | 348 | 1 |
| 347 | 349 | 1 |
| 350 | 351 | 1 |
| 350 | 352 | 1 |
| 350 | 353 | 1 |
| 353 | 354 | 1 |
| 353 | 355 | 1 |
| 353 | 380 | 1 |
| 355 | 356 | 1 |
| 355 | 357 | 1 |
| 355 | 358 | 1 |
| 358 | 359 | 1 |
| 358 | 360 | 1 |
| 358 | 361 | 1 |
| 361 | 362 | 1 |
| 361 | 363 | 1 |
| 361 | 364 | 1 |
| 364 | 365 | 1 |
| 364 | 366 | 1 |
| 364 | 367 | 1 |
| 367 | 368 | 1 |
| 367 | 369 | 1 |
| 367 | 370 | 1 |
| 370 | 371 | 1 |
| 370 | 372 | 1 |
| 370 | 373 | 1 |
| 373 | 374 | 1 |
| 373 | 375 | 1 |
| 373 | 376 | 1 |
| 376 | 377 | 1 |
| 376 | 378 | 1 |
| 376 | 379 | 1 |
| 380 | 381 | 1 |
| 380 | 382 | 1 |
| 380 | 408 | 1 |
| 382 | 383 | 1 |
| 382 | 384 | 1 |
| 384 | 385 | 1 |
| 384 | 386 | 1 |
| 386 | 387 | 1 |
| 386 | 388 | 1 |
| 386 | 389 | 1 |
| 389 | 390 | 1 |
| 389 | 391 | 1 |
| 389 | 392 | 1 |
| 392 | 393 | 1 |
| 392 | 394 | 1 |
| 392 | 395 | 1 |
| 395 | 396 | 1 |
| 395 | 400 | 1 |
| 395 | 404 | 1 |

|     |     |   |
|-----|-----|---|
| 396 | 397 | 1 |
| 396 | 398 | 1 |
| 396 | 399 | 1 |
| 400 | 401 | 1 |
| 400 | 402 | 1 |
| 400 | 403 | 1 |
| 404 | 405 | 1 |
| 404 | 406 | 1 |
| 404 | 407 | 1 |
| 408 | 409 | 1 |
| 408 | 410 | 1 |
| 408 | 413 | 1 |
| 410 | 411 | 1 |
| 410 | 412 | 1 |
| 413 | 414 | 1 |
| 413 | 415 | 1 |
| 413 | 416 | 1 |
| 416 | 417 | 1 |
| 416 | 418 | 1 |
| 416 | 443 | 1 |
| 418 | 419 | 1 |
| 418 | 420 | 1 |
| 418 | 421 | 1 |
| 421 | 422 | 1 |
| 421 | 423 | 1 |
| 421 | 424 | 1 |
| 424 | 425 | 1 |
| 424 | 426 | 1 |
| 424 | 427 | 1 |
| 427 | 428 | 1 |
| 427 | 429 | 1 |
| 427 | 430 | 1 |
| 430 | 431 | 1 |
| 430 | 432 | 1 |
| 430 | 433 | 1 |
| 433 | 434 | 1 |
| 433 | 435 | 1 |
| 433 | 436 | 1 |
| 436 | 437 | 1 |
| 436 | 438 | 1 |
| 436 | 439 | 1 |
| 439 | 440 | 1 |
| 439 | 441 | 1 |
| 439 | 442 | 1 |
| 443 | 444 | 1 |
| 443 | 445 | 1 |
| 443 | 471 | 1 |
| 445 | 446 | 1 |
| 445 | 447 | 1 |
| 447 | 448 | 1 |
| 447 | 449 | 1 |
| 449 | 450 | 1 |
| 449 | 451 | 1 |
| 449 | 452 | 1 |

|     |     |   |
|-----|-----|---|
| 452 | 453 | 1 |
| 452 | 454 | 1 |
| 452 | 455 | 1 |
| 455 | 456 | 1 |
| 455 | 457 | 1 |
| 455 | 458 | 1 |
| 458 | 459 | 1 |
| 458 | 463 | 1 |
| 458 | 467 | 1 |
| 459 | 460 | 1 |
| 459 | 461 | 1 |
| 459 | 462 | 1 |
| 463 | 464 | 1 |
| 463 | 465 | 1 |
| 463 | 466 | 1 |
| 467 | 468 | 1 |
| 467 | 469 | 1 |
| 467 | 470 | 1 |
| 471 | 472 | 1 |
| 471 | 473 | 1 |
| 471 | 476 | 1 |
| 473 | 474 | 1 |
| 473 | 475 | 1 |
| 476 | 477 | 1 |
| 476 | 478 | 1 |
| 476 | 479 | 1 |
| 479 | 480 | 1 |
| 479 | 481 | 1 |
| 479 | 506 | 1 |
| 481 | 482 | 1 |
| 481 | 483 | 1 |
| 481 | 484 | 1 |
| 484 | 485 | 1 |
| 484 | 486 | 1 |
| 484 | 487 | 1 |
| 487 | 488 | 1 |
| 487 | 489 | 1 |
| 487 | 490 | 1 |
| 490 | 491 | 1 |
| 490 | 492 | 1 |
| 490 | 493 | 1 |
| 493 | 494 | 1 |
| 493 | 495 | 1 |
| 493 | 496 | 1 |
| 496 | 497 | 1 |
| 496 | 498 | 1 |
| 496 | 499 | 1 |
| 499 | 500 | 1 |
| 499 | 501 | 1 |
| 499 | 502 | 1 |
| 502 | 503 | 1 |
| 502 | 504 | 1 |
| 502 | 505 | 1 |
| 506 | 507 | 1 |

|     |     |   |
|-----|-----|---|
| 506 | 508 | 1 |
| 506 | 534 | 1 |
| 508 | 509 | 1 |
| 508 | 510 | 1 |
| 510 | 511 | 1 |
| 510 | 512 | 1 |
| 512 | 513 | 1 |
| 512 | 514 | 1 |
| 512 | 515 | 1 |
| 515 | 516 | 1 |
| 515 | 517 | 1 |
| 515 | 518 | 1 |
| 518 | 519 | 1 |
| 518 | 520 | 1 |
| 518 | 521 | 1 |
| 521 | 522 | 1 |
| 521 | 526 | 1 |
| 521 | 530 | 1 |
| 522 | 523 | 1 |
| 522 | 524 | 1 |
| 522 | 525 | 1 |
| 526 | 527 | 1 |
| 526 | 528 | 1 |
| 526 | 529 | 1 |
| 530 | 531 | 1 |
| 530 | 532 | 1 |
| 530 | 533 | 1 |
| 534 | 535 | 1 |
| 534 | 536 | 1 |
| 534 | 539 | 1 |
| 536 | 537 | 1 |
| 536 | 538 | 1 |
| 539 | 540 | 1 |
| 539 | 541 | 1 |
| 539 | 542 | 1 |
| 542 | 543 | 1 |
| 542 | 544 | 1 |
| 542 | 569 | 1 |
| 544 | 545 | 1 |
| 544 | 546 | 1 |
| 544 | 547 | 1 |
| 547 | 548 | 1 |
| 547 | 549 | 1 |
| 547 | 550 | 1 |
| 550 | 551 | 1 |
| 550 | 552 | 1 |
| 550 | 553 | 1 |
| 553 | 554 | 1 |
| 553 | 555 | 1 |
| 553 | 556 | 1 |
| 556 | 557 | 1 |
| 556 | 558 | 1 |
| 556 | 559 | 1 |
| 559 | 560 | 1 |

|     |     |   |
|-----|-----|---|
| 559 | 561 | 1 |
| 559 | 562 | 1 |
| 562 | 563 | 1 |
| 562 | 564 | 1 |
| 562 | 565 | 1 |
| 565 | 566 | 1 |
| 565 | 567 | 1 |
| 565 | 568 | 1 |
| 569 | 570 | 1 |
| 569 | 571 | 1 |
| 569 | 597 | 1 |
| 571 | 572 | 1 |
| 571 | 573 | 1 |
| 573 | 574 | 1 |
| 573 | 575 | 1 |
| 575 | 576 | 1 |
| 575 | 577 | 1 |
| 575 | 578 | 1 |
| 578 | 579 | 1 |
| 578 | 580 | 1 |
| 578 | 581 | 1 |
| 581 | 582 | 1 |
| 581 | 583 | 1 |
| 581 | 584 | 1 |
| 584 | 585 | 1 |
| 584 | 589 | 1 |
| 584 | 593 | 1 |
| 585 | 586 | 1 |
| 585 | 587 | 1 |
| 585 | 588 | 1 |
| 589 | 590 | 1 |
| 589 | 591 | 1 |
| 589 | 592 | 1 |
| 593 | 594 | 1 |
| 593 | 595 | 1 |
| 593 | 596 | 1 |
| 597 | 598 | 1 |
| 597 | 599 | 1 |
| 597 | 602 | 1 |
| 599 | 600 | 1 |
| 599 | 601 | 1 |
| 602 | 603 | 1 |
| 602 | 604 | 1 |
| 602 | 605 | 1 |
| 605 | 606 | 1 |
| 605 | 607 | 1 |
| 605 | 632 | 1 |
| 607 | 608 | 1 |
| 607 | 609 | 1 |
| 607 | 610 | 1 |
| 610 | 611 | 1 |
| 610 | 612 | 1 |
| 610 | 613 | 1 |
| 613 | 614 | 1 |

|     |     |   |
|-----|-----|---|
| 613 | 615 | 1 |
| 613 | 616 | 1 |
| 616 | 617 | 1 |
| 616 | 618 | 1 |
| 616 | 619 | 1 |
| 619 | 620 | 1 |
| 619 | 621 | 1 |
| 619 | 622 | 1 |
| 622 | 623 | 1 |
| 622 | 624 | 1 |
| 622 | 625 | 1 |
| 625 | 626 | 1 |
| 625 | 627 | 1 |
| 625 | 628 | 1 |
| 628 | 629 | 1 |
| 628 | 630 | 1 |
| 628 | 631 | 1 |
| 632 | 633 | 1 |
| 632 | 634 | 1 |
| 632 | 660 | 1 |
| 634 | 635 | 1 |
| 634 | 636 | 1 |
| 636 | 637 | 1 |
| 636 | 638 | 1 |
| 638 | 639 | 1 |
| 638 | 640 | 1 |
| 638 | 641 | 1 |
| 641 | 642 | 1 |
| 641 | 643 | 1 |
| 641 | 644 | 1 |
| 644 | 645 | 1 |
| 644 | 646 | 1 |
| 644 | 647 | 1 |
| 647 | 648 | 1 |
| 647 | 652 | 1 |
| 647 | 656 | 1 |
| 648 | 649 | 1 |
| 648 | 650 | 1 |
| 648 | 651 | 1 |
| 652 | 653 | 1 |
| 652 | 654 | 1 |
| 652 | 655 | 1 |
| 656 | 657 | 1 |
| 656 | 658 | 1 |
| 656 | 659 | 1 |
| 660 | 661 | 1 |
| 660 | 662 | 1 |
| 660 | 665 | 1 |
| 662 | 663 | 1 |
| 662 | 664 | 1 |
| 665 | 666 | 1 |
| 665 | 667 | 1 |
| 665 | 668 | 1 |
| 668 | 669 | 1 |

|     |     |   |
|-----|-----|---|
| 668 | 670 | 1 |
| 668 | 695 | 1 |
| 670 | 671 | 1 |
| 670 | 672 | 1 |
| 670 | 673 | 1 |
| 673 | 674 | 1 |
| 673 | 675 | 1 |
| 673 | 676 | 1 |
| 676 | 677 | 1 |
| 676 | 678 | 1 |
| 676 | 679 | 1 |
| 679 | 680 | 1 |
| 679 | 681 | 1 |
| 679 | 682 | 1 |
| 682 | 683 | 1 |
| 682 | 684 | 1 |
| 682 | 685 | 1 |
| 685 | 686 | 1 |
| 685 | 687 | 1 |
| 685 | 688 | 1 |
| 688 | 689 | 1 |
| 688 | 690 | 1 |
| 688 | 691 | 1 |
| 691 | 692 | 1 |
| 691 | 693 | 1 |
| 691 | 694 | 1 |
| 695 | 696 | 1 |
| 695 | 697 | 1 |
| 695 | 723 | 1 |
| 697 | 698 | 1 |
| 697 | 699 | 1 |
| 699 | 700 | 1 |
| 699 | 701 | 1 |
| 701 | 702 | 1 |
| 701 | 703 | 1 |
| 701 | 704 | 1 |
| 704 | 705 | 1 |
| 704 | 706 | 1 |
| 704 | 707 | 1 |
| 707 | 708 | 1 |
| 707 | 709 | 1 |
| 707 | 710 | 1 |
| 710 | 711 | 1 |
| 710 | 715 | 1 |
| 710 | 719 | 1 |
| 711 | 712 | 1 |
| 711 | 713 | 1 |
| 711 | 714 | 1 |
| 715 | 716 | 1 |
| 715 | 717 | 1 |
| 715 | 718 | 1 |
| 719 | 720 | 1 |
| 719 | 721 | 1 |
| 719 | 722 | 1 |



|     |     |   |
|-----|-----|---|
| 723 | 724 | 1 |
| 723 | 725 | 1 |
| 723 | 728 | 1 |
| 725 | 726 | 1 |
| 725 | 727 | 1 |
| 728 | 729 | 1 |
| 728 | 730 | 1 |
| 728 | 731 | 1 |
| 731 | 732 | 1 |
| 731 | 733 | 1 |
| 731 | 758 | 1 |
| 733 | 734 | 1 |
| 733 | 735 | 1 |
| 733 | 736 | 1 |
| 736 | 737 | 1 |
| 736 | 738 | 1 |
| 736 | 739 | 1 |
| 739 | 740 | 1 |
| 739 | 741 | 1 |
| 739 | 742 | 1 |
| 742 | 743 | 1 |
| 742 | 744 | 1 |
| 742 | 745 | 1 |
| 745 | 746 | 1 |
| 745 | 747 | 1 |
| 745 | 748 | 1 |
| 748 | 749 | 1 |
| 748 | 750 | 1 |
| 748 | 751 | 1 |
| 751 | 752 | 1 |
| 751 | 753 | 1 |
| 751 | 754 | 1 |
| 754 | 755 | 1 |
| 754 | 756 | 1 |
| 754 | 757 | 1 |
| 758 | 759 | 1 |
| 758 | 760 | 1 |
| 758 | 786 | 1 |
| 760 | 761 | 1 |
| 760 | 762 | 1 |
| 762 | 763 | 1 |
| 762 | 764 | 1 |
| 764 | 765 | 1 |
| 764 | 766 | 1 |
| 764 | 767 | 1 |
| 767 | 768 | 1 |
| 767 | 769 | 1 |
| 767 | 770 | 1 |
| 770 | 771 | 1 |
| 770 | 772 | 1 |
| 770 | 773 | 1 |
| 773 | 774 | 1 |
| 773 | 778 | 1 |
| 773 | 782 | 1 |

|     |     |   |
|-----|-----|---|
| 774 | 775 | 1 |
| 774 | 776 | 1 |
| 774 | 777 | 1 |
| 778 | 779 | 1 |
| 778 | 780 | 1 |
| 778 | 781 | 1 |
| 782 | 783 | 1 |
| 782 | 784 | 1 |
| 782 | 785 | 1 |
| 786 | 787 | 1 |
| 786 | 788 | 1 |
| 786 | 791 | 1 |
| 788 | 789 | 1 |
| 788 | 790 | 1 |
| 791 | 792 | 1 |
| 791 | 793 | 1 |
| 791 | 794 | 1 |
| 794 | 795 | 1 |
| 794 | 796 | 1 |
| 794 | 821 | 1 |
| 796 | 797 | 1 |
| 796 | 798 | 1 |
| 796 | 799 | 1 |
| 799 | 800 | 1 |
| 799 | 801 | 1 |
| 799 | 802 | 1 |
| 802 | 803 | 1 |
| 802 | 804 | 1 |
| 802 | 805 | 1 |
| 805 | 806 | 1 |
| 805 | 807 | 1 |
| 805 | 808 | 1 |
| 808 | 809 | 1 |
| 808 | 810 | 1 |
| 808 | 811 | 1 |
| 811 | 812 | 1 |
| 811 | 813 | 1 |
| 811 | 814 | 1 |
| 814 | 815 | 1 |
| 814 | 816 | 1 |
| 814 | 817 | 1 |
| 817 | 818 | 1 |
| 817 | 819 | 1 |
| 817 | 820 | 1 |
| 821 | 822 | 1 |
| 821 | 823 | 1 |
| 821 | 849 | 1 |
| 823 | 824 | 1 |
| 823 | 825 | 1 |
| 825 | 826 | 1 |
| 825 | 827 | 1 |
| 827 | 828 | 1 |
| 827 | 829 | 1 |
| 827 | 830 | 1 |

|     |     |   |
|-----|-----|---|
| 830 | 831 | 1 |
| 830 | 832 | 1 |
| 830 | 833 | 1 |
| 833 | 834 | 1 |
| 833 | 835 | 1 |
| 833 | 836 | 1 |
| 836 | 837 | 1 |
| 836 | 841 | 1 |
| 836 | 845 | 1 |
| 837 | 838 | 1 |
| 837 | 839 | 1 |
| 837 | 840 | 1 |
| 841 | 842 | 1 |
| 841 | 843 | 1 |
| 841 | 844 | 1 |
| 845 | 846 | 1 |
| 845 | 847 | 1 |
| 845 | 848 | 1 |
| 849 | 850 | 1 |
| 849 | 851 | 1 |
| 849 | 854 | 1 |
| 851 | 852 | 1 |
| 851 | 853 | 1 |
| 854 | 855 | 1 |
| 854 | 856 | 1 |
| 854 | 857 | 1 |
| 857 | 858 | 1 |
| 857 | 859 | 1 |
| 857 | 884 | 1 |
| 859 | 860 | 1 |
| 859 | 861 | 1 |
| 859 | 862 | 1 |
| 862 | 863 | 1 |
| 862 | 864 | 1 |
| 862 | 865 | 1 |
| 865 | 866 | 1 |
| 865 | 867 | 1 |
| 865 | 868 | 1 |
| 868 | 869 | 1 |
| 868 | 870 | 1 |
| 868 | 871 | 1 |
| 871 | 872 | 1 |
| 871 | 873 | 1 |
| 871 | 874 | 1 |
| 874 | 875 | 1 |
| 874 | 876 | 1 |
| 874 | 877 | 1 |
| 877 | 878 | 1 |
| 877 | 879 | 1 |
| 877 | 880 | 1 |
| 880 | 881 | 1 |
| 880 | 882 | 1 |
| 880 | 883 | 1 |
| 884 | 885 | 1 |

|     |     |   |
|-----|-----|---|
| 884 | 886 | 1 |
| 884 | 912 | 1 |
| 886 | 887 | 1 |
| 886 | 888 | 1 |
| 888 | 889 | 1 |
| 888 | 890 | 1 |
| 890 | 891 | 1 |
| 890 | 892 | 1 |
| 890 | 893 | 1 |
| 893 | 894 | 1 |
| 893 | 895 | 1 |
| 893 | 896 | 1 |
| 896 | 897 | 1 |
| 896 | 898 | 1 |
| 896 | 899 | 1 |
| 899 | 900 | 1 |
| 899 | 904 | 1 |
| 899 | 908 | 1 |
| 900 | 901 | 1 |
| 900 | 902 | 1 |
| 900 | 903 | 1 |
| 904 | 905 | 1 |
| 904 | 906 | 1 |
| 904 | 907 | 1 |
| 908 | 909 | 1 |
| 908 | 910 | 1 |
| 908 | 911 | 1 |
| 912 | 913 | 1 |
| 912 | 914 | 1 |
| 912 | 917 | 1 |
| 914 | 915 | 1 |
| 914 | 916 | 1 |
| 917 | 918 | 1 |
| 917 | 919 | 1 |
| 917 | 920 | 1 |
| 920 | 921 | 1 |
| 920 | 922 | 1 |
| 920 | 947 | 1 |
| 922 | 923 | 1 |
| 922 | 924 | 1 |
| 922 | 925 | 1 |
| 925 | 926 | 1 |
| 925 | 927 | 1 |
| 925 | 928 | 1 |
| 928 | 929 | 1 |
| 928 | 930 | 1 |
| 928 | 931 | 1 |
| 931 | 932 | 1 |
| 931 | 933 | 1 |
| 931 | 934 | 1 |
| 934 | 935 | 1 |
| 934 | 936 | 1 |
| 934 | 937 | 1 |
| 937 | 938 | 1 |

|     |      |   |
|-----|------|---|
| 937 | 939  | 1 |
| 937 | 940  | 1 |
| 940 | 941  | 1 |
| 940 | 942  | 1 |
| 940 | 943  | 1 |
| 943 | 944  | 1 |
| 943 | 945  | 1 |
| 943 | 946  | 1 |
| 947 | 948  | 1 |
| 947 | 949  | 1 |
| 947 | 975  | 1 |
| 949 | 950  | 1 |
| 949 | 951  | 1 |
| 951 | 952  | 1 |
| 951 | 953  | 1 |
| 953 | 954  | 1 |
| 953 | 955  | 1 |
| 953 | 956  | 1 |
| 956 | 957  | 1 |
| 956 | 958  | 1 |
| 956 | 959  | 1 |
| 959 | 960  | 1 |
| 959 | 961  | 1 |
| 959 | 962  | 1 |
| 962 | 963  | 1 |
| 962 | 967  | 1 |
| 962 | 971  | 1 |
| 963 | 964  | 1 |
| 963 | 965  | 1 |
| 963 | 966  | 1 |
| 967 | 968  | 1 |
| 967 | 969  | 1 |
| 967 | 970  | 1 |
| 971 | 972  | 1 |
| 971 | 973  | 1 |
| 971 | 974  | 1 |
| 975 | 976  | 1 |
| 975 | 977  | 1 |
| 975 | 980  | 1 |
| 977 | 978  | 1 |
| 977 | 979  | 1 |
| 980 | 981  | 1 |
| 980 | 982  | 1 |
| 980 | 983  | 1 |
| 983 | 984  | 1 |
| 983 | 985  | 1 |
| 983 | 1010 | 1 |
| 985 | 986  | 1 |
| 985 | 987  | 1 |
| 985 | 988  | 1 |
| 988 | 989  | 1 |
| 988 | 990  | 1 |
| 988 | 991  | 1 |
| 991 | 992  | 1 |

|      |      |   |
|------|------|---|
| 991  | 993  | 1 |
| 991  | 994  | 1 |
| 994  | 995  | 1 |
| 994  | 996  | 1 |
| 994  | 997  | 1 |
| 997  | 998  | 1 |
| 997  | 999  | 1 |
| 997  | 1000 | 1 |
| 1000 | 1001 | 1 |
| 1000 | 1002 | 1 |
| 1000 | 1003 | 1 |
| 1003 | 1004 | 1 |
| 1003 | 1005 | 1 |
| 1003 | 1006 | 1 |
| 1006 | 1007 | 1 |
| 1006 | 1008 | 1 |
| 1006 | 1009 | 1 |
| 1010 | 1011 | 1 |
| 1010 | 1012 | 1 |
| 1010 | 1038 | 1 |
| 1012 | 1013 | 1 |
| 1012 | 1014 | 1 |
| 1014 | 1015 | 1 |
| 1014 | 1016 | 1 |
| 1016 | 1017 | 1 |
| 1016 | 1018 | 1 |
| 1016 | 1019 | 1 |
| 1019 | 1020 | 1 |
| 1019 | 1021 | 1 |
| 1019 | 1022 | 1 |
| 1022 | 1023 | 1 |
| 1022 | 1024 | 1 |
| 1022 | 1025 | 1 |
| 1025 | 1026 | 1 |
| 1025 | 1030 | 1 |
| 1025 | 1034 | 1 |
| 1026 | 1027 | 1 |
| 1026 | 1028 | 1 |
| 1026 | 1029 | 1 |
| 1030 | 1031 | 1 |
| 1030 | 1032 | 1 |
| 1030 | 1033 | 1 |
| 1034 | 1035 | 1 |
| 1034 | 1036 | 1 |
| 1034 | 1037 | 1 |
| 1038 | 1039 | 1 |
| 1038 | 1040 | 1 |
| 1038 | 1043 | 1 |
| 1040 | 1041 | 1 |
| 1040 | 1042 | 1 |
| 1043 | 1044 | 1 |
| 1043 | 1045 | 1 |
| 1043 | 1046 | 1 |
| 1046 | 1047 | 1 |

|      |      |   |
|------|------|---|
| 1046 | 1048 | 1 |
| 1046 | 1073 | 1 |
| 1048 | 1049 | 1 |
| 1048 | 1050 | 1 |
| 1048 | 1051 | 1 |
| 1051 | 1052 | 1 |
| 1051 | 1053 | 1 |
| 1051 | 1054 | 1 |
| 1054 | 1055 | 1 |
| 1054 | 1056 | 1 |
| 1054 | 1057 | 1 |
| 1057 | 1058 | 1 |
| 1057 | 1059 | 1 |
| 1057 | 1060 | 1 |
| 1060 | 1061 | 1 |
| 1060 | 1062 | 1 |
| 1060 | 1063 | 1 |
| 1063 | 1064 | 1 |
| 1063 | 1065 | 1 |
| 1063 | 1066 | 1 |
| 1066 | 1067 | 1 |
| 1066 | 1068 | 1 |
| 1066 | 1069 | 1 |
| 1069 | 1070 | 1 |
| 1069 | 1071 | 1 |
| 1069 | 1072 | 1 |
| 1073 | 1074 | 1 |
| 1073 | 1075 | 1 |
| 1073 | 1101 | 1 |
| 1075 | 1076 | 1 |
| 1075 | 1077 | 1 |
| 1077 | 1078 | 1 |
| 1077 | 1079 | 1 |
| 1079 | 1080 | 1 |
| 1079 | 1081 | 1 |
| 1079 | 1082 | 1 |
| 1082 | 1083 | 1 |
| 1082 | 1084 | 1 |
| 1082 | 1085 | 1 |
| 1085 | 1086 | 1 |
| 1085 | 1087 | 1 |
| 1085 | 1088 | 1 |
| 1088 | 1089 | 1 |
| 1088 | 1093 | 1 |
| 1088 | 1097 | 1 |
| 1089 | 1090 | 1 |
| 1089 | 1091 | 1 |
| 1089 | 1092 | 1 |
| 1093 | 1094 | 1 |
| 1093 | 1095 | 1 |
| 1093 | 1096 | 1 |
| 1097 | 1098 | 1 |
| 1097 | 1099 | 1 |
| 1097 | 1100 | 1 |

|      |      |   |
|------|------|---|
| 1101 | 1102 | 1 |
| 1101 | 1103 | 1 |
| 1101 | 1106 | 1 |
| 1103 | 1104 | 1 |
| 1103 | 1105 | 1 |
| 1106 | 1107 | 1 |
| 1106 | 1108 | 1 |
| 1106 | 1109 | 1 |
| 1109 | 1110 | 1 |
| 1109 | 1111 | 1 |
| 1109 | 1136 | 1 |
| 1111 | 1112 | 1 |
| 1111 | 1113 | 1 |
| 1111 | 1114 | 1 |
| 1114 | 1115 | 1 |
| 1114 | 1116 | 1 |
| 1114 | 1117 | 1 |
| 1117 | 1118 | 1 |
| 1117 | 1119 | 1 |
| 1117 | 1120 | 1 |
| 1120 | 1121 | 1 |
| 1120 | 1122 | 1 |
| 1120 | 1123 | 1 |
| 1123 | 1124 | 1 |
| 1123 | 1125 | 1 |
| 1123 | 1126 | 1 |
| 1126 | 1127 | 1 |
| 1126 | 1128 | 1 |
| 1126 | 1129 | 1 |
| 1129 | 1130 | 1 |
| 1129 | 1131 | 1 |
| 1129 | 1132 | 1 |
| 1132 | 1133 | 1 |
| 1132 | 1134 | 1 |
| 1132 | 1135 | 1 |
| 1136 | 1137 | 1 |
| 1136 | 1138 | 1 |
| 1136 | 1164 | 1 |
| 1138 | 1139 | 1 |
| 1138 | 1140 | 1 |
| 1140 | 1141 | 1 |
| 1140 | 1142 | 1 |
| 1142 | 1143 | 1 |
| 1142 | 1144 | 1 |
| 1142 | 1145 | 1 |
| 1145 | 1146 | 1 |
| 1145 | 1147 | 1 |
| 1145 | 1148 | 1 |
| 1148 | 1149 | 1 |
| 1148 | 1150 | 1 |
| 1148 | 1151 | 1 |
| 1151 | 1152 | 1 |
| 1151 | 1156 | 1 |
| 1151 | 1160 | 1 |



|      |      |   |
|------|------|---|
| 1152 | 1153 | 1 |
| 1152 | 1154 | 1 |
| 1152 | 1155 | 1 |
| 1156 | 1157 | 1 |
| 1156 | 1158 | 1 |
| 1156 | 1159 | 1 |
| 1160 | 1161 | 1 |
| 1160 | 1162 | 1 |
| 1160 | 1163 | 1 |
| 1164 | 1165 | 1 |
| 1164 | 1166 | 1 |
| 1164 | 1169 | 1 |
| 1166 | 1167 | 1 |
| 1166 | 1168 | 1 |
| 1169 | 1170 | 1 |
| 1169 | 1171 | 1 |
| 1169 | 1172 | 1 |
| 1172 | 1173 | 1 |
| 1172 | 1174 | 1 |
| 1172 | 1199 | 1 |
| 1174 | 1175 | 1 |
| 1174 | 1176 | 1 |
| 1174 | 1177 | 1 |
| 1177 | 1178 | 1 |
| 1177 | 1179 | 1 |
| 1177 | 1180 | 1 |
| 1180 | 1181 | 1 |
| 1180 | 1182 | 1 |
| 1180 | 1183 | 1 |
| 1183 | 1184 | 1 |
| 1183 | 1185 | 1 |
| 1183 | 1186 | 1 |
| 1186 | 1187 | 1 |
| 1186 | 1188 | 1 |
| 1186 | 1189 | 1 |
| 1189 | 1190 | 1 |
| 1189 | 1191 | 1 |
| 1189 | 1192 | 1 |
| 1192 | 1193 | 1 |
| 1192 | 1194 | 1 |
| 1192 | 1195 | 1 |
| 1195 | 1196 | 1 |
| 1195 | 1197 | 1 |
| 1195 | 1198 | 1 |
| 1199 | 1200 | 1 |
| 1199 | 1201 | 1 |
| 1199 | 1227 | 1 |
| 1201 | 1202 | 1 |
| 1201 | 1203 | 1 |
| 1203 | 1204 | 1 |
| 1203 | 1205 | 1 |
| 1205 | 1206 | 1 |
| 1205 | 1207 | 1 |
| 1205 | 1208 | 1 |

|      |      |   |
|------|------|---|
| 1208 | 1209 | 1 |
| 1208 | 1210 | 1 |
| 1208 | 1211 | 1 |
| 1211 | 1212 | 1 |
| 1211 | 1213 | 1 |
| 1211 | 1214 | 1 |
| 1214 | 1215 | 1 |
| 1214 | 1219 | 1 |
| 1214 | 1223 | 1 |
| 1215 | 1216 | 1 |
| 1215 | 1217 | 1 |
| 1215 | 1218 | 1 |
| 1219 | 1220 | 1 |
| 1219 | 1221 | 1 |
| 1219 | 1222 | 1 |
| 1223 | 1224 | 1 |
| 1223 | 1225 | 1 |
| 1223 | 1226 | 1 |
| 1227 | 1228 | 1 |
| 1227 | 1229 | 1 |
| 1227 | 1232 | 1 |
| 1229 | 1230 | 1 |
| 1229 | 1231 | 1 |
| 1232 | 1233 | 1 |
| 1232 | 1234 | 1 |
| 1232 | 1235 | 1 |
| 1235 | 1236 | 1 |
| 1235 | 1237 | 1 |
| 1235 | 1262 | 1 |
| 1237 | 1238 | 1 |
| 1237 | 1239 | 1 |
| 1237 | 1240 | 1 |
| 1240 | 1241 | 1 |
| 1240 | 1242 | 1 |
| 1240 | 1243 | 1 |
| 1243 | 1244 | 1 |
| 1243 | 1245 | 1 |
| 1243 | 1246 | 1 |
| 1246 | 1247 | 1 |
| 1246 | 1248 | 1 |
| 1246 | 1249 | 1 |
| 1249 | 1250 | 1 |
| 1249 | 1251 | 1 |
| 1249 | 1252 | 1 |
| 1252 | 1253 | 1 |
| 1252 | 1254 | 1 |
| 1252 | 1255 | 1 |
| 1255 | 1256 | 1 |
| 1255 | 1257 | 1 |
| 1255 | 1258 | 1 |
| 1258 | 1259 | 1 |
| 1258 | 1260 | 1 |
| 1258 | 1261 | 1 |
| 1262 | 1263 | 1 |

|      |      |   |
|------|------|---|
| 1262 | 1264 | 1 |
| 1262 | 1290 | 1 |
| 1264 | 1265 | 1 |
| 1264 | 1266 | 1 |
| 1266 | 1267 | 1 |
| 1266 | 1268 | 1 |
| 1268 | 1269 | 1 |
| 1268 | 1270 | 1 |
| 1268 | 1271 | 1 |
| 1271 | 1272 | 1 |
| 1271 | 1273 | 1 |
| 1271 | 1274 | 1 |
| 1274 | 1275 | 1 |
| 1274 | 1276 | 1 |
| 1274 | 1277 | 1 |
| 1277 | 1278 | 1 |
| 1277 | 1282 | 1 |
| 1277 | 1286 | 1 |
| 1278 | 1279 | 1 |
| 1278 | 1280 | 1 |
| 1278 | 1281 | 1 |
| 1282 | 1283 | 1 |
| 1282 | 1284 | 1 |
| 1282 | 1285 | 1 |
| 1286 | 1287 | 1 |
| 1286 | 1288 | 1 |
| 1286 | 1289 | 1 |
| 1290 | 1291 | 1 |
| 1290 | 1292 | 1 |
| 1290 | 1295 | 1 |
| 1292 | 1293 | 1 |
| 1292 | 1294 | 1 |
| 1295 | 1296 | 1 |
| 1295 | 1297 | 1 |
| 1295 | 1298 | 1 |
| 1298 | 1299 | 1 |
| 1298 | 1300 | 1 |
| 1298 | 1325 | 1 |
| 1300 | 1301 | 1 |
| 1300 | 1302 | 1 |
| 1300 | 1303 | 1 |
| 1303 | 1304 | 1 |
| 1303 | 1305 | 1 |
| 1303 | 1306 | 1 |
| 1306 | 1307 | 1 |
| 1306 | 1308 | 1 |
| 1306 | 1309 | 1 |
| 1309 | 1310 | 1 |
| 1309 | 1311 | 1 |
| 1309 | 1312 | 1 |
| 1312 | 1313 | 1 |
| 1312 | 1314 | 1 |
| 1312 | 1315 | 1 |
| 1315 | 1316 | 1 |

|      |      |   |
|------|------|---|
| 1315 | 1317 | 1 |
| 1315 | 1318 | 1 |
| 1318 | 1319 | 1 |
| 1318 | 1320 | 1 |
| 1318 | 1321 | 1 |
| 1321 | 1322 | 1 |
| 1321 | 1323 | 1 |
| 1321 | 1324 | 1 |
| 1325 | 1326 | 1 |
| 1325 | 1327 | 1 |
| 1325 | 1353 | 1 |
| 1327 | 1328 | 1 |
| 1327 | 1329 | 1 |
| 1329 | 1330 | 1 |
| 1329 | 1331 | 1 |
| 1331 | 1332 | 1 |
| 1331 | 1333 | 1 |
| 1331 | 1334 | 1 |
| 1334 | 1335 | 1 |
| 1334 | 1336 | 1 |
| 1334 | 1337 | 1 |
| 1337 | 1338 | 1 |
| 1337 | 1339 | 1 |
| 1337 | 1340 | 1 |
| 1340 | 1341 | 1 |
| 1340 | 1345 | 1 |
| 1340 | 1349 | 1 |
| 1341 | 1342 | 1 |
| 1341 | 1343 | 1 |
| 1341 | 1344 | 1 |
| 1345 | 1346 | 1 |
| 1345 | 1347 | 1 |
| 1345 | 1348 | 1 |
| 1349 | 1350 | 1 |
| 1349 | 1351 | 1 |
| 1349 | 1352 | 1 |
| 1353 | 1354 | 1 |
| 1353 | 1355 | 1 |
| 1353 | 1358 | 1 |
| 1355 | 1356 | 1 |
| 1355 | 1357 | 1 |
| 1358 | 1359 | 1 |
| 1358 | 1360 | 1 |
| 1358 | 1361 | 1 |
| 1361 | 1362 | 1 |
| 1361 | 1363 | 1 |
| 1361 | 1388 | 1 |
| 1363 | 1364 | 1 |
| 1363 | 1365 | 1 |
| 1363 | 1366 | 1 |
| 1366 | 1367 | 1 |
| 1366 | 1368 | 1 |
| 1366 | 1369 | 1 |
| 1369 | 1370 | 1 |

|      |      |   |
|------|------|---|
| 1369 | 1371 | 1 |
| 1369 | 1372 | 1 |
| 1372 | 1373 | 1 |
| 1372 | 1374 | 1 |
| 1372 | 1375 | 1 |
| 1375 | 1376 | 1 |
| 1375 | 1377 | 1 |
| 1375 | 1378 | 1 |
| 1378 | 1379 | 1 |
| 1378 | 1380 | 1 |
| 1378 | 1381 | 1 |
| 1381 | 1382 | 1 |
| 1381 | 1383 | 1 |
| 1381 | 1384 | 1 |
| 1384 | 1385 | 1 |
| 1384 | 1386 | 1 |
| 1384 | 1387 | 1 |
| 1388 | 1389 | 1 |
| 1388 | 1390 | 1 |
| 1388 | 1416 | 1 |
| 1390 | 1391 | 1 |
| 1390 | 1392 | 1 |
| 1392 | 1393 | 1 |
| 1392 | 1394 | 1 |
| 1394 | 1395 | 1 |
| 1394 | 1396 | 1 |
| 1394 | 1397 | 1 |
| 1397 | 1398 | 1 |
| 1397 | 1399 | 1 |
| 1397 | 1400 | 1 |
| 1400 | 1401 | 1 |
| 1400 | 1402 | 1 |
| 1400 | 1403 | 1 |
| 1403 | 1404 | 1 |
| 1403 | 1408 | 1 |
| 1403 | 1412 | 1 |
| 1404 | 1405 | 1 |
| 1404 | 1406 | 1 |
| 1404 | 1407 | 1 |
| 1408 | 1409 | 1 |
| 1408 | 1410 | 1 |
| 1408 | 1411 | 1 |
| 1412 | 1413 | 1 |
| 1412 | 1414 | 1 |
| 1412 | 1415 | 1 |
| 1416 | 1417 | 1 |
| 1416 | 1418 | 1 |
| 1416 | 1421 | 1 |
| 1418 | 1419 | 1 |
| 1418 | 1420 | 1 |
| 1421 | 1422 | 1 |
| 1421 | 1423 | 1 |
| 1421 | 1424 | 1 |
| 1424 | 1425 | 1 |

|      |      |   |
|------|------|---|
| 1424 | 1426 | 1 |
| 1424 | 1451 | 1 |
| 1426 | 1427 | 1 |
| 1426 | 1428 | 1 |
| 1426 | 1429 | 1 |
| 1429 | 1430 | 1 |
| 1429 | 1431 | 1 |
| 1429 | 1432 | 1 |
| 1432 | 1433 | 1 |
| 1432 | 1434 | 1 |
| 1432 | 1435 | 1 |
| 1435 | 1436 | 1 |
| 1435 | 1437 | 1 |
| 1435 | 1438 | 1 |
| 1438 | 1439 | 1 |
| 1438 | 1440 | 1 |
| 1438 | 1441 | 1 |
| 1441 | 1442 | 1 |
| 1441 | 1443 | 1 |
| 1441 | 1444 | 1 |
| 1444 | 1445 | 1 |
| 1444 | 1446 | 1 |
| 1444 | 1447 | 1 |
| 1447 | 1448 | 1 |
| 1447 | 1449 | 1 |
| 1447 | 1450 | 1 |
| 1451 | 1452 | 1 |
| 1451 | 1453 | 1 |
| 1451 | 1479 | 1 |
| 1453 | 1454 | 1 |
| 1453 | 1455 | 1 |
| 1455 | 1456 | 1 |
| 1455 | 1457 | 1 |
| 1457 | 1458 | 1 |
| 1457 | 1459 | 1 |
| 1457 | 1460 | 1 |
| 1460 | 1461 | 1 |
| 1460 | 1462 | 1 |
| 1460 | 1463 | 1 |
| 1463 | 1464 | 1 |
| 1463 | 1465 | 1 |
| 1463 | 1466 | 1 |
| 1466 | 1467 | 1 |
| 1466 | 1471 | 1 |
| 1466 | 1475 | 1 |
| 1467 | 1468 | 1 |
| 1467 | 1469 | 1 |
| 1467 | 1470 | 1 |
| 1471 | 1472 | 1 |
| 1471 | 1473 | 1 |
| 1471 | 1474 | 1 |
| 1475 | 1476 | 1 |
| 1475 | 1477 | 1 |
| 1475 | 1478 | 1 |

|      |      |   |
|------|------|---|
| 1479 | 1480 | 1 |
| 1479 | 1481 | 1 |
| 1479 | 1484 | 1 |
| 1481 | 1482 | 1 |
| 1481 | 1483 | 1 |
| 1484 | 1485 | 1 |
| 1484 | 1486 | 1 |
| 1484 | 1487 | 1 |
| 1487 | 1488 | 1 |
| 1487 | 1489 | 1 |
| 1487 | 1514 | 1 |
| 1489 | 1490 | 1 |
| 1489 | 1491 | 1 |
| 1489 | 1492 | 1 |
| 1492 | 1493 | 1 |
| 1492 | 1494 | 1 |
| 1492 | 1495 | 1 |
| 1495 | 1496 | 1 |
| 1495 | 1497 | 1 |
| 1495 | 1498 | 1 |
| 1498 | 1499 | 1 |
| 1498 | 1500 | 1 |
| 1498 | 1501 | 1 |
| 1501 | 1502 | 1 |
| 1501 | 1503 | 1 |
| 1501 | 1504 | 1 |
| 1504 | 1505 | 1 |
| 1504 | 1506 | 1 |
| 1504 | 1507 | 1 |
| 1507 | 1508 | 1 |
| 1507 | 1509 | 1 |
| 1507 | 1510 | 1 |
| 1510 | 1511 | 1 |
| 1510 | 1512 | 1 |
| 1510 | 1513 | 1 |
| 1514 | 1515 | 1 |
| 1514 | 1516 | 1 |
| 1514 | 1542 | 1 |
| 1516 | 1517 | 1 |
| 1516 | 1518 | 1 |
| 1518 | 1519 | 1 |
| 1518 | 1520 | 1 |
| 1520 | 1521 | 1 |
| 1520 | 1522 | 1 |
| 1520 | 1523 | 1 |
| 1523 | 1524 | 1 |
| 1523 | 1525 | 1 |
| 1523 | 1526 | 1 |
| 1526 | 1527 | 1 |
| 1526 | 1528 | 1 |
| 1526 | 1529 | 1 |
| 1529 | 1530 | 1 |
| 1529 | 1534 | 1 |
| 1529 | 1538 | 1 |

|      |      |   |
|------|------|---|
| 1530 | 1531 | 1 |
| 1530 | 1532 | 1 |
| 1530 | 1533 | 1 |
| 1534 | 1535 | 1 |
| 1534 | 1536 | 1 |
| 1534 | 1537 | 1 |
| 1538 | 1539 | 1 |
| 1538 | 1540 | 1 |
| 1538 | 1541 | 1 |
| 1542 | 1543 | 1 |
| 1542 | 1544 | 1 |
| 1542 | 1547 | 1 |
| 1544 | 1545 | 1 |
| 1544 | 1546 | 1 |
| 1547 | 1548 | 1 |
| 1547 | 1549 | 1 |
| 1547 | 1550 | 1 |
| 1550 | 1551 | 1 |
| 1550 | 1552 | 1 |
| 1550 | 1577 | 1 |
| 1552 | 1553 | 1 |
| 1552 | 1554 | 1 |
| 1552 | 1555 | 1 |
| 1555 | 1556 | 1 |
| 1555 | 1557 | 1 |
| 1555 | 1558 | 1 |
| 1558 | 1559 | 1 |
| 1558 | 1560 | 1 |
| 1558 | 1561 | 1 |
| 1561 | 1562 | 1 |
| 1561 | 1563 | 1 |
| 1561 | 1564 | 1 |
| 1564 | 1565 | 1 |
| 1564 | 1566 | 1 |
| 1564 | 1567 | 1 |
| 1567 | 1568 | 1 |
| 1567 | 1569 | 1 |
| 1567 | 1570 | 1 |
| 1570 | 1571 | 1 |
| 1570 | 1572 | 1 |
| 1570 | 1573 | 1 |
| 1573 | 1574 | 1 |
| 1573 | 1575 | 1 |
| 1573 | 1576 | 1 |
| 1577 | 1578 | 1 |
| 1577 | 1579 | 1 |
| 1577 | 1605 | 1 |
| 1579 | 1580 | 1 |
| 1579 | 1581 | 1 |
| 1581 | 1582 | 1 |
| 1581 | 1583 | 1 |
| 1583 | 1584 | 1 |
| 1583 | 1585 | 1 |
| 1583 | 1586 | 1 |



|      |      |   |
|------|------|---|
| 1586 | 1587 | 1 |
| 1586 | 1588 | 1 |
| 1586 | 1589 | 1 |
| 1589 | 1590 | 1 |
| 1589 | 1591 | 1 |
| 1589 | 1592 | 1 |
| 1592 | 1593 | 1 |
| 1592 | 1597 | 1 |
| 1592 | 1601 | 1 |
| 1593 | 1594 | 1 |
| 1593 | 1595 | 1 |
| 1593 | 1596 | 1 |
| 1597 | 1598 | 1 |
| 1597 | 1599 | 1 |
| 1597 | 1600 | 1 |
| 1601 | 1602 | 1 |
| 1601 | 1603 | 1 |
| 1601 | 1604 | 1 |
| 1605 | 1606 | 1 |
| 1605 | 1607 | 1 |
| 1605 | 1610 | 1 |
| 1607 | 1608 | 1 |
| 1607 | 1609 | 1 |
| 1610 | 1611 | 1 |
| 1610 | 1612 | 1 |
| 1610 | 1613 | 1 |
| 1613 | 1614 | 1 |
| 1613 | 1615 | 1 |
| 1613 | 1640 | 1 |
| 1615 | 1616 | 1 |
| 1615 | 1617 | 1 |
| 1615 | 1618 | 1 |
| 1618 | 1619 | 1 |
| 1618 | 1620 | 1 |
| 1618 | 1621 | 1 |
| 1621 | 1622 | 1 |
| 1621 | 1623 | 1 |
| 1621 | 1624 | 1 |
| 1624 | 1625 | 1 |
| 1624 | 1626 | 1 |
| 1624 | 1627 | 1 |
| 1627 | 1628 | 1 |
| 1627 | 1629 | 1 |
| 1627 | 1630 | 1 |
| 1630 | 1631 | 1 |
| 1630 | 1632 | 1 |
| 1630 | 1633 | 1 |
| 1633 | 1634 | 1 |
| 1633 | 1635 | 1 |
| 1633 | 1636 | 1 |
| 1636 | 1637 | 1 |
| 1636 | 1638 | 1 |
| 1636 | 1639 | 1 |
| 1640 | 1641 | 1 |

|      |      |   |
|------|------|---|
| 1640 | 1642 | 1 |
| 1640 | 1668 | 1 |
| 1642 | 1643 | 1 |
| 1642 | 1644 | 1 |
| 1644 | 1645 | 1 |
| 1644 | 1646 | 1 |
| 1646 | 1647 | 1 |
| 1646 | 1648 | 1 |
| 1646 | 1649 | 1 |
| 1649 | 1650 | 1 |
| 1649 | 1651 | 1 |
| 1649 | 1652 | 1 |
| 1652 | 1653 | 1 |
| 1652 | 1654 | 1 |
| 1652 | 1655 | 1 |
| 1655 | 1656 | 1 |
| 1655 | 1660 | 1 |
| 1655 | 1664 | 1 |
| 1656 | 1657 | 1 |
| 1656 | 1658 | 1 |
| 1656 | 1659 | 1 |
| 1660 | 1661 | 1 |
| 1660 | 1662 | 1 |
| 1660 | 1663 | 1 |
| 1664 | 1665 | 1 |
| 1664 | 1666 | 1 |
| 1664 | 1667 | 1 |
| 1668 | 1669 | 1 |
| 1668 | 1670 | 1 |
| 1668 | 1673 | 1 |
| 1670 | 1671 | 1 |
| 1670 | 1672 | 1 |
| 1673 | 1674 | 1 |
| 1673 | 1675 | 1 |
| 1673 | 1676 | 1 |
| 1676 | 1677 | 1 |
| 1676 | 1678 | 1 |
| 1676 | 1703 | 1 |
| 1678 | 1679 | 1 |
| 1678 | 1680 | 1 |
| 1678 | 1681 | 1 |
| 1681 | 1682 | 1 |
| 1681 | 1683 | 1 |
| 1681 | 1684 | 1 |
| 1684 | 1685 | 1 |
| 1684 | 1686 | 1 |
| 1684 | 1687 | 1 |
| 1687 | 1688 | 1 |
| 1687 | 1689 | 1 |
| 1687 | 1690 | 1 |
| 1690 | 1691 | 1 |
| 1690 | 1692 | 1 |
| 1690 | 1693 | 1 |
| 1693 | 1694 | 1 |

|      |      |   |
|------|------|---|
| 1693 | 1695 | 1 |
| 1693 | 1696 | 1 |
| 1696 | 1697 | 1 |
| 1696 | 1698 | 1 |
| 1696 | 1699 | 1 |
| 1699 | 1700 | 1 |
| 1699 | 1701 | 1 |
| 1699 | 1702 | 1 |
| 1703 | 1704 | 1 |
| 1703 | 1705 | 1 |
| 1703 | 1731 | 1 |
| 1705 | 1706 | 1 |
| 1705 | 1707 | 1 |
| 1707 | 1708 | 1 |
| 1707 | 1709 | 1 |
| 1709 | 1710 | 1 |
| 1709 | 1711 | 1 |
| 1709 | 1712 | 1 |
| 1712 | 1713 | 1 |
| 1712 | 1714 | 1 |
| 1712 | 1715 | 1 |
| 1715 | 1716 | 1 |
| 1715 | 1717 | 1 |
| 1715 | 1718 | 1 |
| 1718 | 1719 | 1 |
| 1718 | 1723 | 1 |
| 1718 | 1727 | 1 |
| 1719 | 1720 | 1 |
| 1719 | 1721 | 1 |
| 1719 | 1722 | 1 |
| 1723 | 1724 | 1 |
| 1723 | 1725 | 1 |
| 1723 | 1726 | 1 |
| 1727 | 1728 | 1 |
| 1727 | 1729 | 1 |
| 1727 | 1730 | 1 |
| 1731 | 1732 | 1 |
| 1731 | 1733 | 1 |
| 1731 | 1736 | 1 |
| 1733 | 1734 | 1 |
| 1733 | 1735 | 1 |
| 1736 | 1737 | 1 |
| 1736 | 1738 | 1 |
| 1736 | 1739 | 1 |
| 1739 | 1740 | 1 |
| 1739 | 1741 | 1 |
| 1739 | 1766 | 1 |
| 1741 | 1742 | 1 |
| 1741 | 1743 | 1 |
| 1741 | 1744 | 1 |
| 1744 | 1745 | 1 |
| 1744 | 1746 | 1 |
| 1744 | 1747 | 1 |
| 1747 | 1748 | 1 |

|      |      |   |
|------|------|---|
| 1747 | 1749 | 1 |
| 1747 | 1750 | 1 |
| 1750 | 1751 | 1 |
| 1750 | 1752 | 1 |
| 1750 | 1753 | 1 |
| 1753 | 1754 | 1 |
| 1753 | 1755 | 1 |
| 1753 | 1756 | 1 |
| 1756 | 1757 | 1 |
| 1756 | 1758 | 1 |
| 1756 | 1759 | 1 |
| 1759 | 1760 | 1 |
| 1759 | 1761 | 1 |
| 1759 | 1762 | 1 |
| 1762 | 1763 | 1 |
| 1762 | 1764 | 1 |
| 1762 | 1765 | 1 |
| 1766 | 1767 | 1 |
| 1766 | 1768 | 1 |
| 1766 | 1794 | 1 |
| 1768 | 1769 | 1 |
| 1768 | 1770 | 1 |
| 1770 | 1771 | 1 |
| 1770 | 1772 | 1 |
| 1772 | 1773 | 1 |
| 1772 | 1774 | 1 |
| 1772 | 1775 | 1 |
| 1775 | 1776 | 1 |
| 1775 | 1777 | 1 |
| 1775 | 1778 | 1 |
| 1778 | 1779 | 1 |
| 1778 | 1780 | 1 |
| 1778 | 1781 | 1 |
| 1781 | 1782 | 1 |
| 1781 | 1786 | 1 |
| 1781 | 1790 | 1 |
| 1782 | 1783 | 1 |
| 1782 | 1784 | 1 |
| 1782 | 1785 | 1 |
| 1786 | 1787 | 1 |
| 1786 | 1788 | 1 |
| 1786 | 1789 | 1 |
| 1790 | 1791 | 1 |
| 1790 | 1792 | 1 |
| 1790 | 1793 | 1 |
| 1794 | 1795 | 1 |
| 1794 | 1796 | 1 |
| 1794 | 1799 | 1 |
| 1796 | 1797 | 1 |
| 1796 | 1798 | 1 |
| 1799 | 1800 | 1 |
| 1799 | 1801 | 1 |
| 1799 | 1802 | 1 |
| 1802 | 1803 | 1 |

|      |      |   |
|------|------|---|
| 1802 | 1804 | 1 |
| 1802 | 1829 | 1 |
| 1804 | 1805 | 1 |
| 1804 | 1806 | 1 |
| 1804 | 1807 | 1 |
| 1807 | 1808 | 1 |
| 1807 | 1809 | 1 |
| 1807 | 1810 | 1 |
| 1810 | 1811 | 1 |
| 1810 | 1812 | 1 |
| 1810 | 1813 | 1 |
| 1813 | 1814 | 1 |
| 1813 | 1815 | 1 |
| 1813 | 1816 | 1 |
| 1816 | 1817 | 1 |
| 1816 | 1818 | 1 |
| 1816 | 1819 | 1 |
| 1819 | 1820 | 1 |
| 1819 | 1821 | 1 |
| 1819 | 1822 | 1 |
| 1822 | 1823 | 1 |
| 1822 | 1824 | 1 |
| 1822 | 1825 | 1 |
| 1825 | 1826 | 1 |
| 1825 | 1827 | 1 |
| 1825 | 1828 | 1 |
| 1829 | 1830 | 1 |
| 1829 | 1831 | 1 |
| 1829 | 1857 | 1 |
| 1831 | 1832 | 1 |
| 1831 | 1833 | 1 |
| 1833 | 1834 | 1 |
| 1833 | 1835 | 1 |
| 1835 | 1836 | 1 |
| 1835 | 1837 | 1 |
| 1835 | 1838 | 1 |
| 1838 | 1839 | 1 |
| 1838 | 1840 | 1 |
| 1838 | 1841 | 1 |
| 1841 | 1842 | 1 |
| 1841 | 1843 | 1 |
| 1841 | 1844 | 1 |
| 1844 | 1845 | 1 |
| 1844 | 1849 | 1 |
| 1844 | 1853 | 1 |
| 1845 | 1846 | 1 |
| 1845 | 1847 | 1 |
| 1845 | 1848 | 1 |
| 1849 | 1850 | 1 |
| 1849 | 1851 | 1 |
| 1849 | 1852 | 1 |
| 1853 | 1854 | 1 |
| 1853 | 1855 | 1 |
| 1853 | 1856 | 1 |

|      |      |   |
|------|------|---|
| 1857 | 1858 | 1 |
| 1857 | 1859 | 1 |
| 1857 | 1862 | 1 |
| 1859 | 1860 | 1 |
| 1859 | 1861 | 1 |
| 1862 | 1863 | 1 |
| 1862 | 1864 | 1 |
| 1862 | 1865 | 1 |
| 1865 | 1866 | 1 |
| 1865 | 1867 | 1 |
| 1865 | 1892 | 1 |
| 1867 | 1868 | 1 |
| 1867 | 1869 | 1 |
| 1867 | 1870 | 1 |
| 1870 | 1871 | 1 |
| 1870 | 1872 | 1 |
| 1870 | 1873 | 1 |
| 1873 | 1874 | 1 |
| 1873 | 1875 | 1 |
| 1873 | 1876 | 1 |
| 1876 | 1877 | 1 |
| 1876 | 1878 | 1 |
| 1876 | 1879 | 1 |
| 1879 | 1880 | 1 |
| 1879 | 1881 | 1 |
| 1879 | 1882 | 1 |
| 1882 | 1883 | 1 |
| 1882 | 1884 | 1 |
| 1882 | 1885 | 1 |
| 1885 | 1886 | 1 |
| 1885 | 1887 | 1 |
| 1885 | 1888 | 1 |
| 1888 | 1889 | 1 |
| 1888 | 1890 | 1 |
| 1888 | 1891 | 1 |
| 1892 | 1893 | 1 |
| 1892 | 1894 | 1 |
| 1892 | 1920 | 1 |
| 1894 | 1895 | 1 |
| 1894 | 1896 | 1 |
| 1896 | 1897 | 1 |
| 1896 | 1898 | 1 |
| 1898 | 1899 | 1 |
| 1898 | 1900 | 1 |
| 1898 | 1901 | 1 |
| 1901 | 1902 | 1 |
| 1901 | 1903 | 1 |
| 1901 | 1904 | 1 |
| 1904 | 1905 | 1 |
| 1904 | 1906 | 1 |
| 1904 | 1907 | 1 |
| 1907 | 1908 | 1 |
| 1907 | 1912 | 1 |
| 1907 | 1916 | 1 |

|      |      |   |
|------|------|---|
| 1908 | 1909 | 1 |
| 1908 | 1910 | 1 |
| 1908 | 1911 | 1 |
| 1912 | 1913 | 1 |
| 1912 | 1914 | 1 |
| 1912 | 1915 | 1 |
| 1916 | 1917 | 1 |
| 1916 | 1918 | 1 |
| 1916 | 1919 | 1 |
| 1920 | 1921 | 1 |
| 1920 | 1922 | 1 |
| 1920 | 1925 | 1 |
| 1922 | 1923 | 1 |
| 1922 | 1924 | 1 |
| 1925 | 1926 | 1 |
| 1925 | 1927 | 1 |
| 1925 | 1928 | 1 |
| 1928 | 1929 | 1 |
| 1928 | 1930 | 1 |
| 1928 | 1955 | 1 |
| 1930 | 1931 | 1 |
| 1930 | 1932 | 1 |
| 1930 | 1933 | 1 |
| 1933 | 1934 | 1 |
| 1933 | 1935 | 1 |
| 1933 | 1936 | 1 |
| 1936 | 1937 | 1 |
| 1936 | 1938 | 1 |
| 1936 | 1939 | 1 |
| 1939 | 1940 | 1 |
| 1939 | 1941 | 1 |
| 1939 | 1942 | 1 |
| 1942 | 1943 | 1 |
| 1942 | 1944 | 1 |
| 1942 | 1945 | 1 |
| 1945 | 1946 | 1 |
| 1945 | 1947 | 1 |
| 1945 | 1948 | 1 |
| 1948 | 1949 | 1 |
| 1948 | 1950 | 1 |
| 1948 | 1951 | 1 |
| 1951 | 1952 | 1 |
| 1951 | 1953 | 1 |
| 1951 | 1954 | 1 |
| 1955 | 1956 | 1 |
| 1955 | 1957 | 1 |
| 1955 | 1983 | 1 |
| 1957 | 1958 | 1 |
| 1957 | 1959 | 1 |
| 1959 | 1960 | 1 |
| 1959 | 1961 | 1 |
| 1961 | 1962 | 1 |
| 1961 | 1963 | 1 |
| 1961 | 1964 | 1 |

|      |      |   |
|------|------|---|
| 1964 | 1965 | 1 |
| 1964 | 1966 | 1 |
| 1964 | 1967 | 1 |
| 1967 | 1968 | 1 |
| 1967 | 1969 | 1 |
| 1967 | 1970 | 1 |
| 1970 | 1971 | 1 |
| 1970 | 1975 | 1 |
| 1970 | 1979 | 1 |
| 1971 | 1972 | 1 |
| 1971 | 1973 | 1 |
| 1971 | 1974 | 1 |
| 1975 | 1976 | 1 |
| 1975 | 1977 | 1 |
| 1975 | 1978 | 1 |
| 1979 | 1980 | 1 |
| 1979 | 1981 | 1 |
| 1979 | 1982 | 1 |
| 1983 | 1984 | 1 |
| 1983 | 1985 | 1 |
| 1983 | 1988 | 1 |
| 1985 | 1986 | 1 |
| 1985 | 1987 | 1 |
| 1988 | 1989 | 1 |
| 1988 | 1990 | 1 |
| 1988 | 1991 | 1 |
| 1991 | 1992 | 1 |
| 1991 | 1993 | 1 |
| 1991 | 2018 | 1 |
| 1993 | 1994 | 1 |
| 1993 | 1995 | 1 |
| 1993 | 1996 | 1 |
| 1996 | 1997 | 1 |
| 1996 | 1998 | 1 |
| 1996 | 1999 | 1 |
| 1999 | 2000 | 1 |
| 1999 | 2001 | 1 |
| 1999 | 2002 | 1 |
| 2002 | 2003 | 1 |
| 2002 | 2004 | 1 |
| 2002 | 2005 | 1 |
| 2005 | 2006 | 1 |
| 2005 | 2007 | 1 |
| 2005 | 2008 | 1 |
| 2008 | 2009 | 1 |
| 2008 | 2010 | 1 |
| 2008 | 2011 | 1 |
| 2011 | 2012 | 1 |
| 2011 | 2013 | 1 |
| 2011 | 2014 | 1 |
| 2014 | 2015 | 1 |
| 2014 | 2016 | 1 |
| 2014 | 2017 | 1 |
| 2018 | 2019 | 1 |



|      |      |   |
|------|------|---|
| 2018 | 2020 | 1 |
| 2018 | 2046 | 1 |
| 2020 | 2021 | 1 |
| 2020 | 2022 | 1 |
| 2022 | 2023 | 1 |
| 2022 | 2024 | 1 |
| 2024 | 2025 | 1 |
| 2024 | 2026 | 1 |
| 2024 | 2027 | 1 |
| 2027 | 2028 | 1 |
| 2027 | 2029 | 1 |
| 2027 | 2030 | 1 |
| 2030 | 2031 | 1 |
| 2030 | 2032 | 1 |
| 2030 | 2033 | 1 |
| 2033 | 2034 | 1 |
| 2033 | 2038 | 1 |
| 2033 | 2042 | 1 |
| 2034 | 2035 | 1 |
| 2034 | 2036 | 1 |
| 2034 | 2037 | 1 |
| 2038 | 2039 | 1 |
| 2038 | 2040 | 1 |
| 2038 | 2041 | 1 |
| 2042 | 2043 | 1 |
| 2042 | 2044 | 1 |
| 2042 | 2045 | 1 |
| 2046 | 2047 | 1 |
| 2046 | 2048 | 1 |
| 2046 | 2051 | 1 |
| 2048 | 2049 | 1 |
| 2048 | 2050 | 1 |
| 2051 | 2052 | 1 |
| 2051 | 2053 | 1 |
| 2051 | 2054 | 1 |
| 2054 | 2055 | 1 |
| 2054 | 2056 | 1 |
| 2054 | 2081 | 1 |
| 2056 | 2057 | 1 |
| 2056 | 2058 | 1 |
| 2056 | 2059 | 1 |
| 2059 | 2060 | 1 |
| 2059 | 2061 | 1 |
| 2059 | 2062 | 1 |
| 2062 | 2063 | 1 |
| 2062 | 2064 | 1 |
| 2062 | 2065 | 1 |
| 2065 | 2066 | 1 |
| 2065 | 2067 | 1 |
| 2065 | 2068 | 1 |
| 2068 | 2069 | 1 |
| 2068 | 2070 | 1 |
| 2068 | 2071 | 1 |
| 2071 | 2072 | 1 |

|      |      |   |
|------|------|---|
| 2071 | 2073 | 1 |
| 2071 | 2074 | 1 |
| 2074 | 2075 | 1 |
| 2074 | 2076 | 1 |
| 2074 | 2077 | 1 |
| 2077 | 2078 | 1 |
| 2077 | 2079 | 1 |
| 2077 | 2080 | 1 |
| 2081 | 2082 | 1 |
| 2081 | 2083 | 1 |
| 2081 | 2109 | 1 |
| 2083 | 2084 | 1 |
| 2083 | 2085 | 1 |
| 2085 | 2086 | 1 |
| 2085 | 2087 | 1 |
| 2087 | 2088 | 1 |
| 2087 | 2089 | 1 |
| 2087 | 2090 | 1 |
| 2090 | 2091 | 1 |
| 2090 | 2092 | 1 |
| 2090 | 2093 | 1 |
| 2093 | 2094 | 1 |
| 2093 | 2095 | 1 |
| 2093 | 2096 | 1 |
| 2096 | 2097 | 1 |
| 2096 | 2101 | 1 |
| 2096 | 2105 | 1 |
| 2097 | 2098 | 1 |
| 2097 | 2099 | 1 |
| 2097 | 2100 | 1 |
| 2101 | 2102 | 1 |
| 2101 | 2103 | 1 |
| 2101 | 2104 | 1 |
| 2105 | 2106 | 1 |
| 2105 | 2107 | 1 |
| 2105 | 2108 | 1 |
| 2109 | 2110 | 1 |
| 2109 | 2111 | 1 |
| 2109 | 2114 | 1 |
| 2111 | 2112 | 1 |
| 2111 | 2113 | 1 |
| 2114 | 2115 | 1 |
| 2114 | 2116 | 1 |
| 2114 | 2117 | 1 |
| 2117 | 2118 | 1 |
| 2117 | 2119 | 1 |
| 2117 | 2144 | 1 |
| 2119 | 2120 | 1 |
| 2119 | 2121 | 1 |
| 2119 | 2122 | 1 |
| 2122 | 2123 | 1 |
| 2122 | 2124 | 1 |
| 2122 | 2125 | 1 |
| 2125 | 2126 | 1 |

|      |      |   |
|------|------|---|
| 2125 | 2127 | 1 |
| 2125 | 2128 | 1 |
| 2128 | 2129 | 1 |
| 2128 | 2130 | 1 |
| 2128 | 2131 | 1 |
| 2131 | 2132 | 1 |
| 2131 | 2133 | 1 |
| 2131 | 2134 | 1 |
| 2134 | 2135 | 1 |
| 2134 | 2136 | 1 |
| 2134 | 2137 | 1 |
| 2137 | 2138 | 1 |
| 2137 | 2139 | 1 |
| 2137 | 2140 | 1 |
| 2140 | 2141 | 1 |
| 2140 | 2142 | 1 |
| 2140 | 2143 | 1 |
| 2144 | 2145 | 1 |
| 2144 | 2146 | 1 |
| 2144 | 2172 | 1 |
| 2146 | 2147 | 1 |
| 2146 | 2148 | 1 |
| 2148 | 2149 | 1 |
| 2148 | 2150 | 1 |
| 2150 | 2151 | 1 |
| 2150 | 2152 | 1 |
| 2150 | 2153 | 1 |
| 2153 | 2154 | 1 |
| 2153 | 2155 | 1 |
| 2153 | 2156 | 1 |
| 2156 | 2157 | 1 |
| 2156 | 2158 | 1 |
| 2156 | 2159 | 1 |
| 2159 | 2160 | 1 |
| 2159 | 2164 | 1 |
| 2159 | 2168 | 1 |
| 2160 | 2161 | 1 |
| 2160 | 2162 | 1 |
| 2160 | 2163 | 1 |
| 2164 | 2165 | 1 |
| 2164 | 2166 | 1 |
| 2164 | 2167 | 1 |
| 2168 | 2169 | 1 |
| 2168 | 2170 | 1 |
| 2168 | 2171 | 1 |
| 2172 | 2173 | 1 |
| 2172 | 2174 | 1 |
| 2172 | 2177 | 1 |
| 2174 | 2175 | 1 |
| 2174 | 2176 | 1 |
| 2177 | 2178 | 1 |
| 2177 | 2179 | 1 |
| 2177 | 2180 | 1 |
| 2180 | 2181 | 1 |

|      |      |   |
|------|------|---|
| 2180 | 2182 | 1 |
| 2180 | 2207 | 1 |
| 2182 | 2183 | 1 |
| 2182 | 2184 | 1 |
| 2182 | 2185 | 1 |
| 2185 | 2186 | 1 |
| 2185 | 2187 | 1 |
| 2185 | 2188 | 1 |
| 2188 | 2189 | 1 |
| 2188 | 2190 | 1 |
| 2188 | 2191 | 1 |
| 2191 | 2192 | 1 |
| 2191 | 2193 | 1 |
| 2191 | 2194 | 1 |
| 2194 | 2195 | 1 |
| 2194 | 2196 | 1 |
| 2194 | 2197 | 1 |
| 2197 | 2198 | 1 |
| 2197 | 2199 | 1 |
| 2197 | 2200 | 1 |
| 2200 | 2201 | 1 |
| 2200 | 2202 | 1 |
| 2200 | 2203 | 1 |
| 2203 | 2204 | 1 |
| 2203 | 2205 | 1 |
| 2203 | 2206 | 1 |
| 2207 | 2208 | 1 |
| 2207 | 2209 | 1 |
| 2207 | 2235 | 1 |
| 2209 | 2210 | 1 |
| 2209 | 2211 | 1 |
| 2211 | 2212 | 1 |
| 2211 | 2213 | 1 |
| 2213 | 2214 | 1 |
| 2213 | 2215 | 1 |
| 2213 | 2216 | 1 |
| 2216 | 2217 | 1 |
| 2216 | 2218 | 1 |
| 2216 | 2219 | 1 |
| 2219 | 2220 | 1 |
| 2219 | 2221 | 1 |
| 2219 | 2222 | 1 |
| 2222 | 2223 | 1 |
| 2222 | 2227 | 1 |
| 2222 | 2231 | 1 |
| 2223 | 2224 | 1 |
| 2223 | 2225 | 1 |
| 2223 | 2226 | 1 |
| 2227 | 2228 | 1 |
| 2227 | 2229 | 1 |
| 2227 | 2230 | 1 |
| 2231 | 2232 | 1 |
| 2231 | 2233 | 1 |
| 2231 | 2234 | 1 |

|      |      |   |
|------|------|---|
| 2235 | 2236 | 1 |
| 2235 | 2237 | 1 |
| 2235 | 2240 | 1 |
| 2237 | 2238 | 1 |
| 2237 | 2239 | 1 |
| 2240 | 2241 | 1 |
| 2240 | 2242 | 1 |
| 2240 | 2243 | 1 |
| 2243 | 2244 | 1 |
| 2243 | 2245 | 1 |
| 2243 | 2270 | 1 |
| 2245 | 2246 | 1 |
| 2245 | 2247 | 1 |
| 2245 | 2248 | 1 |
| 2248 | 2249 | 1 |
| 2248 | 2250 | 1 |
| 2248 | 2251 | 1 |
| 2251 | 2252 | 1 |
| 2251 | 2253 | 1 |
| 2251 | 2254 | 1 |
| 2254 | 2255 | 1 |
| 2254 | 2256 | 1 |
| 2254 | 2257 | 1 |
| 2257 | 2258 | 1 |
| 2257 | 2259 | 1 |
| 2257 | 2260 | 1 |
| 2260 | 2261 | 1 |
| 2260 | 2262 | 1 |
| 2260 | 2263 | 1 |
| 2263 | 2264 | 1 |
| 2263 | 2265 | 1 |
| 2263 | 2266 | 1 |
| 2266 | 2267 | 1 |
| 2266 | 2268 | 1 |
| 2266 | 2269 | 1 |
| 2270 | 2271 | 1 |
| 2270 | 2272 | 1 |
| 2270 | 2298 | 1 |
| 2272 | 2273 | 1 |
| 2272 | 2274 | 1 |
| 2274 | 2275 | 1 |
| 2274 | 2276 | 1 |
| 2276 | 2277 | 1 |
| 2276 | 2278 | 1 |
| 2276 | 2279 | 1 |
| 2279 | 2280 | 1 |
| 2279 | 2281 | 1 |
| 2279 | 2282 | 1 |
| 2282 | 2283 | 1 |
| 2282 | 2284 | 1 |
| 2282 | 2285 | 1 |
| 2285 | 2286 | 1 |
| 2285 | 2290 | 1 |
| 2285 | 2294 | 1 |

|      |      |   |
|------|------|---|
| 2286 | 2287 | 1 |
| 2286 | 2288 | 1 |
| 2286 | 2289 | 1 |
| 2290 | 2291 | 1 |
| 2290 | 2292 | 1 |
| 2290 | 2293 | 1 |
| 2294 | 2295 | 1 |
| 2294 | 2296 | 1 |
| 2294 | 2297 | 1 |
| 2298 | 2299 | 1 |
| 2298 | 2300 | 1 |
| 2298 | 2303 | 1 |
| 2300 | 2301 | 1 |
| 2300 | 2302 | 1 |
| 2303 | 2304 | 1 |
| 2303 | 2305 | 1 |
| 2303 | 2306 | 1 |
| 2306 | 2307 | 1 |
| 2306 | 2308 | 1 |
| 2306 | 2333 | 1 |
| 2308 | 2309 | 1 |
| 2308 | 2310 | 1 |
| 2308 | 2311 | 1 |
| 2311 | 2312 | 1 |
| 2311 | 2313 | 1 |
| 2311 | 2314 | 1 |
| 2314 | 2315 | 1 |
| 2314 | 2316 | 1 |
| 2314 | 2317 | 1 |
| 2317 | 2318 | 1 |
| 2317 | 2319 | 1 |
| 2317 | 2320 | 1 |
| 2320 | 2321 | 1 |
| 2320 | 2322 | 1 |
| 2320 | 2323 | 1 |
| 2323 | 2324 | 1 |
| 2323 | 2325 | 1 |
| 2323 | 2326 | 1 |
| 2326 | 2327 | 1 |
| 2326 | 2328 | 1 |
| 2326 | 2329 | 1 |
| 2329 | 2330 | 1 |
| 2329 | 2331 | 1 |
| 2329 | 2332 | 1 |
| 2333 | 2334 | 1 |
| 2333 | 2335 | 1 |
| 2333 | 2361 | 1 |
| 2335 | 2336 | 1 |
| 2335 | 2337 | 1 |
| 2337 | 2338 | 1 |
| 2337 | 2339 | 1 |
| 2339 | 2340 | 1 |
| 2339 | 2341 | 1 |
| 2339 | 2342 | 1 |

|      |      |   |
|------|------|---|
| 2342 | 2343 | 1 |
| 2342 | 2344 | 1 |
| 2342 | 2345 | 1 |
| 2345 | 2346 | 1 |
| 2345 | 2347 | 1 |
| 2345 | 2348 | 1 |
| 2348 | 2349 | 1 |
| 2348 | 2353 | 1 |
| 2348 | 2357 | 1 |
| 2349 | 2350 | 1 |
| 2349 | 2351 | 1 |
| 2349 | 2352 | 1 |
| 2353 | 2354 | 1 |
| 2353 | 2355 | 1 |
| 2353 | 2356 | 1 |
| 2357 | 2358 | 1 |
| 2357 | 2359 | 1 |
| 2357 | 2360 | 1 |
| 2361 | 2362 | 1 |
| 2361 | 2363 | 1 |
| 2361 | 2366 | 1 |
| 2363 | 2364 | 1 |
| 2363 | 2365 | 1 |
| 2366 | 2367 | 1 |
| 2366 | 2368 | 1 |
| 2366 | 2369 | 1 |
| 2369 | 2370 | 1 |
| 2369 | 2371 | 1 |
| 2369 | 2396 | 1 |
| 2371 | 2372 | 1 |
| 2371 | 2373 | 1 |
| 2371 | 2374 | 1 |
| 2374 | 2375 | 1 |
| 2374 | 2376 | 1 |
| 2374 | 2377 | 1 |
| 2377 | 2378 | 1 |
| 2377 | 2379 | 1 |
| 2377 | 2380 | 1 |
| 2380 | 2381 | 1 |
| 2380 | 2382 | 1 |
| 2380 | 2383 | 1 |
| 2383 | 2384 | 1 |
| 2383 | 2385 | 1 |
| 2383 | 2386 | 1 |
| 2386 | 2387 | 1 |
| 2386 | 2388 | 1 |
| 2386 | 2389 | 1 |
| 2389 | 2390 | 1 |
| 2389 | 2391 | 1 |
| 2389 | 2392 | 1 |
| 2392 | 2393 | 1 |
| 2392 | 2394 | 1 |
| 2392 | 2395 | 1 |
| 2396 | 2397 | 1 |

|      |      |   |
|------|------|---|
| 2396 | 2398 | 1 |
| 2396 | 2424 | 1 |
| 2398 | 2399 | 1 |
| 2398 | 2400 | 1 |
| 2400 | 2401 | 1 |
| 2400 | 2402 | 1 |
| 2402 | 2403 | 1 |
| 2402 | 2404 | 1 |
| 2402 | 2405 | 1 |
| 2405 | 2406 | 1 |
| 2405 | 2407 | 1 |
| 2405 | 2408 | 1 |
| 2408 | 2409 | 1 |
| 2408 | 2410 | 1 |
| 2408 | 2411 | 1 |
| 2411 | 2412 | 1 |
| 2411 | 2416 | 1 |
| 2411 | 2420 | 1 |
| 2412 | 2413 | 1 |
| 2412 | 2414 | 1 |
| 2412 | 2415 | 1 |
| 2416 | 2417 | 1 |
| 2416 | 2418 | 1 |
| 2416 | 2419 | 1 |
| 2420 | 2421 | 1 |
| 2420 | 2422 | 1 |
| 2420 | 2423 | 1 |
| 2424 | 2425 | 1 |
| 2424 | 2426 | 1 |
| 2424 | 2429 | 1 |
| 2426 | 2427 | 1 |
| 2426 | 2428 | 1 |
| 2429 | 2430 | 1 |
| 2429 | 2431 | 1 |
| 2429 | 2432 | 1 |
| 2432 | 2433 | 1 |
| 2432 | 2434 | 1 |
| 2432 | 2459 | 1 |
| 2434 | 2435 | 1 |
| 2434 | 2436 | 1 |
| 2434 | 2437 | 1 |
| 2437 | 2438 | 1 |
| 2437 | 2439 | 1 |
| 2437 | 2440 | 1 |
| 2440 | 2441 | 1 |
| 2440 | 2442 | 1 |
| 2440 | 2443 | 1 |
| 2443 | 2444 | 1 |
| 2443 | 2445 | 1 |
| 2443 | 2446 | 1 |
| 2446 | 2447 | 1 |
| 2446 | 2448 | 1 |
| 2446 | 2449 | 1 |
| 2449 | 2450 | 1 |



|      |      |   |
|------|------|---|
| 2449 | 2451 | 1 |
| 2449 | 2452 | 1 |
| 2452 | 2453 | 1 |
| 2452 | 2454 | 1 |
| 2452 | 2455 | 1 |
| 2455 | 2456 | 1 |
| 2455 | 2457 | 1 |
| 2455 | 2458 | 1 |
| 2459 | 2460 | 1 |
| 2459 | 2461 | 1 |
| 2459 | 2487 | 1 |
| 2461 | 2462 | 1 |
| 2461 | 2463 | 1 |
| 2463 | 2464 | 1 |
| 2463 | 2465 | 1 |
| 2465 | 2466 | 1 |
| 2465 | 2467 | 1 |
| 2465 | 2468 | 1 |
| 2468 | 2469 | 1 |
| 2468 | 2470 | 1 |
| 2468 | 2471 | 1 |
| 2471 | 2472 | 1 |
| 2471 | 2473 | 1 |
| 2471 | 2474 | 1 |
| 2474 | 2475 | 1 |
| 2474 | 2479 | 1 |
| 2474 | 2483 | 1 |
| 2475 | 2476 | 1 |
| 2475 | 2477 | 1 |
| 2475 | 2478 | 1 |
| 2479 | 2480 | 1 |
| 2479 | 2481 | 1 |
| 2479 | 2482 | 1 |
| 2483 | 2484 | 1 |
| 2483 | 2485 | 1 |
| 2483 | 2486 | 1 |
| 2487 | 2488 | 1 |
| 2487 | 2489 | 1 |
| 2487 | 2492 | 1 |
| 2489 | 2490 | 1 |
| 2489 | 2491 | 1 |
| 2492 | 2493 | 1 |
| 2492 | 2494 | 1 |
| 2492 | 2495 | 1 |
| 2495 | 2496 | 1 |
| 2495 | 2497 | 1 |
| 2495 | 2522 | 1 |
| 2497 | 2498 | 1 |
| 2497 | 2499 | 1 |
| 2497 | 2500 | 1 |
| 2500 | 2501 | 1 |
| 2500 | 2502 | 1 |
| 2500 | 2503 | 1 |
| 2503 | 2504 | 1 |

|      |      |   |
|------|------|---|
| 2503 | 2505 | 1 |
| 2503 | 2506 | 1 |
| 2506 | 2507 | 1 |
| 2506 | 2508 | 1 |
| 2506 | 2509 | 1 |
| 2509 | 2510 | 1 |
| 2509 | 2511 | 1 |
| 2509 | 2512 | 1 |
| 2512 | 2513 | 1 |
| 2512 | 2514 | 1 |
| 2512 | 2515 | 1 |
| 2515 | 2516 | 1 |
| 2515 | 2517 | 1 |
| 2515 | 2518 | 1 |
| 2518 | 2519 | 1 |
| 2518 | 2520 | 1 |
| 2518 | 2521 | 1 |
| 2522 | 2523 | 1 |
| 2522 | 2524 | 1 |
| 2522 | 2550 | 1 |
| 2524 | 2525 | 1 |
| 2524 | 2526 | 1 |
| 2526 | 2527 | 1 |
| 2526 | 2528 | 1 |
| 2528 | 2529 | 1 |
| 2528 | 2530 | 1 |
| 2528 | 2531 | 1 |
| 2531 | 2532 | 1 |
| 2531 | 2533 | 1 |
| 2531 | 2534 | 1 |
| 2534 | 2535 | 1 |
| 2534 | 2536 | 1 |
| 2534 | 2537 | 1 |
| 2537 | 2538 | 1 |
| 2537 | 2542 | 1 |
| 2537 | 2546 | 1 |
| 2538 | 2539 | 1 |
| 2538 | 2540 | 1 |
| 2538 | 2541 | 1 |
| 2542 | 2543 | 1 |
| 2542 | 2544 | 1 |
| 2542 | 2545 | 1 |
| 2546 | 2547 | 1 |
| 2546 | 2548 | 1 |
| 2546 | 2549 | 1 |
| 2550 | 2551 | 1 |
| 2550 | 2552 | 1 |
| 2550 | 2555 | 1 |
| 2552 | 2553 | 1 |
| 2552 | 2554 | 1 |
| 2555 | 2556 | 1 |
| 2555 | 2557 | 1 |
| 2555 | 2558 | 1 |
| 2558 | 2559 | 1 |

|      |      |   |
|------|------|---|
| 2558 | 2560 | 1 |
| 2558 | 2585 | 1 |
| 2560 | 2561 | 1 |
| 2560 | 2562 | 1 |
| 2560 | 2563 | 1 |
| 2563 | 2564 | 1 |
| 2563 | 2565 | 1 |
| 2563 | 2566 | 1 |
| 2566 | 2567 | 1 |
| 2566 | 2568 | 1 |
| 2566 | 2569 | 1 |
| 2569 | 2570 | 1 |
| 2569 | 2571 | 1 |
| 2569 | 2572 | 1 |
| 2572 | 2573 | 1 |
| 2572 | 2574 | 1 |
| 2572 | 2575 | 1 |
| 2575 | 2576 | 1 |
| 2575 | 2577 | 1 |
| 2575 | 2578 | 1 |
| 2578 | 2579 | 1 |
| 2578 | 2580 | 1 |
| 2578 | 2581 | 1 |
| 2581 | 2582 | 1 |
| 2581 | 2583 | 1 |
| 2581 | 2584 | 1 |
| 2585 | 2586 | 1 |
| 2585 | 2587 | 1 |
| 2585 | 2613 | 1 |
| 2587 | 2588 | 1 |
| 2587 | 2589 | 1 |
| 2589 | 2590 | 1 |
| 2589 | 2591 | 1 |
| 2591 | 2592 | 1 |
| 2591 | 2593 | 1 |
| 2591 | 2594 | 1 |
| 2594 | 2595 | 1 |
| 2594 | 2596 | 1 |
| 2594 | 2597 | 1 |
| 2597 | 2598 | 1 |
| 2597 | 2599 | 1 |
| 2597 | 2600 | 1 |
| 2600 | 2601 | 1 |
| 2600 | 2605 | 1 |
| 2600 | 2609 | 1 |
| 2601 | 2602 | 1 |
| 2601 | 2603 | 1 |
| 2601 | 2604 | 1 |
| 2605 | 2606 | 1 |
| 2605 | 2607 | 1 |
| 2605 | 2608 | 1 |
| 2609 | 2610 | 1 |
| 2609 | 2611 | 1 |
| 2609 | 2612 | 1 |

|      |      |   |
|------|------|---|
| 2613 | 2614 | 1 |
| 2613 | 2615 | 1 |
| 2613 | 2618 | 1 |
| 2615 | 2616 | 1 |
| 2615 | 2617 | 1 |
| 2618 | 2619 | 1 |
| 2618 | 2620 | 1 |
| 2618 | 2621 | 1 |
| 2621 | 2622 | 1 |
| 2621 | 2623 | 1 |
| 2621 | 2648 | 1 |
| 2623 | 2624 | 1 |
| 2623 | 2625 | 1 |
| 2623 | 2626 | 1 |
| 2626 | 2627 | 1 |
| 2626 | 2628 | 1 |
| 2626 | 2629 | 1 |
| 2629 | 2630 | 1 |
| 2629 | 2631 | 1 |
| 2629 | 2632 | 1 |
| 2632 | 2633 | 1 |
| 2632 | 2634 | 1 |
| 2632 | 2635 | 1 |
| 2635 | 2636 | 1 |
| 2635 | 2637 | 1 |
| 2635 | 2638 | 1 |
| 2638 | 2639 | 1 |
| 2638 | 2640 | 1 |
| 2638 | 2641 | 1 |
| 2641 | 2642 | 1 |
| 2641 | 2643 | 1 |
| 2641 | 2644 | 1 |
| 2644 | 2645 | 1 |
| 2644 | 2646 | 1 |
| 2644 | 2647 | 1 |
| 2648 | 2649 | 1 |
| 2648 | 2650 | 1 |
| 2648 | 2676 | 1 |
| 2650 | 2651 | 1 |
| 2650 | 2652 | 1 |
| 2652 | 2653 | 1 |
| 2652 | 2654 | 1 |
| 2654 | 2655 | 1 |
| 2654 | 2656 | 1 |
| 2654 | 2657 | 1 |
| 2657 | 2658 | 1 |
| 2657 | 2659 | 1 |
| 2657 | 2660 | 1 |
| 2660 | 2661 | 1 |
| 2660 | 2662 | 1 |
| 2660 | 2663 | 1 |
| 2663 | 2664 | 1 |
| 2663 | 2668 | 1 |
| 2663 | 2672 | 1 |

|      |      |   |
|------|------|---|
| 2664 | 2665 | 1 |
| 2664 | 2666 | 1 |
| 2664 | 2667 | 1 |
| 2668 | 2669 | 1 |
| 2668 | 2670 | 1 |
| 2668 | 2671 | 1 |
| 2672 | 2673 | 1 |
| 2672 | 2674 | 1 |
| 2672 | 2675 | 1 |
| 2676 | 2677 | 1 |
| 2676 | 2678 | 1 |
| 2676 | 2681 | 1 |
| 2678 | 2679 | 1 |
| 2678 | 2680 | 1 |
| 2681 | 2682 | 1 |
| 2681 | 2683 | 1 |
| 2681 | 2684 | 1 |
| 2684 | 2685 | 1 |
| 2684 | 2686 | 1 |
| 2684 | 2711 | 1 |
| 2686 | 2687 | 1 |
| 2686 | 2688 | 1 |
| 2686 | 2689 | 1 |
| 2689 | 2690 | 1 |
| 2689 | 2691 | 1 |
| 2689 | 2692 | 1 |
| 2692 | 2693 | 1 |
| 2692 | 2694 | 1 |
| 2692 | 2695 | 1 |
| 2695 | 2696 | 1 |
| 2695 | 2697 | 1 |
| 2695 | 2698 | 1 |
| 2698 | 2699 | 1 |
| 2698 | 2700 | 1 |
| 2698 | 2701 | 1 |
| 2701 | 2702 | 1 |
| 2701 | 2703 | 1 |
| 2701 | 2704 | 1 |
| 2704 | 2705 | 1 |
| 2704 | 2706 | 1 |
| 2704 | 2707 | 1 |
| 2707 | 2708 | 1 |
| 2707 | 2709 | 1 |
| 2707 | 2710 | 1 |
| 2711 | 2712 | 1 |
| 2711 | 2713 | 1 |
| 2711 | 2739 | 1 |
| 2713 | 2714 | 1 |
| 2713 | 2715 | 1 |
| 2715 | 2716 | 1 |
| 2715 | 2717 | 1 |
| 2717 | 2718 | 1 |
| 2717 | 2719 | 1 |
| 2717 | 2720 | 1 |

|      |      |   |
|------|------|---|
| 2720 | 2721 | 1 |
| 2720 | 2722 | 1 |
| 2720 | 2723 | 1 |
| 2723 | 2724 | 1 |
| 2723 | 2725 | 1 |
| 2723 | 2726 | 1 |
| 2726 | 2727 | 1 |
| 2726 | 2731 | 1 |
| 2726 | 2735 | 1 |
| 2727 | 2728 | 1 |
| 2727 | 2729 | 1 |
| 2727 | 2730 | 1 |
| 2731 | 2732 | 1 |
| 2731 | 2733 | 1 |
| 2731 | 2734 | 1 |
| 2735 | 2736 | 1 |
| 2735 | 2737 | 1 |
| 2735 | 2738 | 1 |
| 2739 | 2740 | 1 |
| 2739 | 2741 | 1 |
| 2739 | 2744 | 1 |
| 2741 | 2742 | 1 |
| 2741 | 2743 | 1 |
| 2744 | 2745 | 1 |
| 2744 | 2746 | 1 |
| 2744 | 2747 | 1 |
| 2747 | 2748 | 1 |
| 2747 | 2749 | 1 |
| 2747 | 2774 | 1 |
| 2749 | 2750 | 1 |
| 2749 | 2751 | 1 |
| 2749 | 2752 | 1 |
| 2752 | 2753 | 1 |
| 2752 | 2754 | 1 |
| 2752 | 2755 | 1 |
| 2755 | 2756 | 1 |
| 2755 | 2757 | 1 |
| 2755 | 2758 | 1 |
| 2758 | 2759 | 1 |
| 2758 | 2760 | 1 |
| 2758 | 2761 | 1 |
| 2761 | 2762 | 1 |
| 2761 | 2763 | 1 |
| 2761 | 2764 | 1 |
| 2764 | 2765 | 1 |
| 2764 | 2766 | 1 |
| 2764 | 2767 | 1 |
| 2767 | 2768 | 1 |
| 2767 | 2769 | 1 |
| 2767 | 2770 | 1 |
| 2770 | 2771 | 1 |
| 2770 | 2772 | 1 |
| 2770 | 2773 | 1 |
| 2774 | 2775 | 1 |

|      |      |   |
|------|------|---|
| 2774 | 2776 | 1 |
| 2774 | 2802 | 1 |
| 2776 | 2777 | 1 |
| 2776 | 2778 | 1 |
| 2778 | 2779 | 1 |
| 2778 | 2780 | 1 |
| 2780 | 2781 | 1 |
| 2780 | 2782 | 1 |
| 2780 | 2783 | 1 |
| 2783 | 2784 | 1 |
| 2783 | 2785 | 1 |
| 2783 | 2786 | 1 |
| 2786 | 2787 | 1 |
| 2786 | 2788 | 1 |
| 2786 | 2789 | 1 |
| 2789 | 2790 | 1 |
| 2789 | 2794 | 1 |
| 2789 | 2798 | 1 |
| 2790 | 2791 | 1 |
| 2790 | 2792 | 1 |
| 2790 | 2793 | 1 |
| 2794 | 2795 | 1 |
| 2794 | 2796 | 1 |
| 2794 | 2797 | 1 |
| 2798 | 2799 | 1 |
| 2798 | 2800 | 1 |
| 2798 | 2801 | 1 |
| 2802 | 2803 | 1 |
| 2802 | 2804 | 1 |
| 2802 | 2807 | 1 |
| 2804 | 2805 | 1 |
| 2804 | 2806 | 1 |
| 2807 | 2808 | 1 |
| 2807 | 2809 | 1 |
| 2807 | 2810 | 1 |
| 2810 | 2811 | 1 |
| 2810 | 2812 | 1 |
| 2810 | 2837 | 1 |
| 2812 | 2813 | 1 |
| 2812 | 2814 | 1 |
| 2812 | 2815 | 1 |
| 2815 | 2816 | 1 |
| 2815 | 2817 | 1 |
| 2815 | 2818 | 1 |
| 2818 | 2819 | 1 |
| 2818 | 2820 | 1 |
| 2818 | 2821 | 1 |
| 2821 | 2822 | 1 |
| 2821 | 2823 | 1 |
| 2821 | 2824 | 1 |
| 2824 | 2825 | 1 |
| 2824 | 2826 | 1 |
| 2824 | 2827 | 1 |
| 2827 | 2828 | 1 |

|      |      |   |
|------|------|---|
| 2827 | 2829 | 1 |
| 2827 | 2830 | 1 |
| 2830 | 2831 | 1 |
| 2830 | 2832 | 1 |
| 2830 | 2833 | 1 |
| 2833 | 2834 | 1 |
| 2833 | 2835 | 1 |
| 2833 | 2836 | 1 |
| 2837 | 2838 | 1 |
| 2837 | 2839 | 1 |
| 2837 | 2865 | 1 |
| 2839 | 2840 | 1 |
| 2839 | 2841 | 1 |
| 2841 | 2842 | 1 |
| 2841 | 2843 | 1 |
| 2843 | 2844 | 1 |
| 2843 | 2845 | 1 |
| 2843 | 2846 | 1 |
| 2846 | 2847 | 1 |
| 2846 | 2848 | 1 |
| 2846 | 2849 | 1 |
| 2849 | 2850 | 1 |
| 2849 | 2851 | 1 |
| 2849 | 2852 | 1 |
| 2852 | 2853 | 1 |
| 2852 | 2857 | 1 |
| 2852 | 2861 | 1 |
| 2853 | 2854 | 1 |
| 2853 | 2855 | 1 |
| 2853 | 2856 | 1 |
| 2857 | 2858 | 1 |
| 2857 | 2859 | 1 |
| 2857 | 2860 | 1 |
| 2861 | 2862 | 1 |
| 2861 | 2863 | 1 |
| 2861 | 2864 | 1 |
| 2865 | 2866 | 1 |
| 2865 | 2867 | 1 |
| 2865 | 2870 | 1 |
| 2867 | 2868 | 1 |
| 2867 | 2869 | 1 |
| 2870 | 2871 | 1 |
| 2870 | 2872 | 1 |
| 2870 | 2873 | 1 |
| 2873 | 2874 | 1 |
| 2873 | 2875 | 1 |
| 2873 | 2900 | 1 |
| 2875 | 2876 | 1 |
| 2875 | 2877 | 1 |
| 2875 | 2878 | 1 |
| 2878 | 2879 | 1 |
| 2878 | 2880 | 1 |
| 2878 | 2881 | 1 |
| 2881 | 2882 | 1 |



|      |      |   |
|------|------|---|
| 2881 | 2883 | 1 |
| 2881 | 2884 | 1 |
| 2884 | 2885 | 1 |
| 2884 | 2886 | 1 |
| 2884 | 2887 | 1 |
| 2887 | 2888 | 1 |
| 2887 | 2889 | 1 |
| 2887 | 2890 | 1 |
| 2890 | 2891 | 1 |
| 2890 | 2892 | 1 |
| 2890 | 2893 | 1 |
| 2893 | 2894 | 1 |
| 2893 | 2895 | 1 |
| 2893 | 2896 | 1 |
| 2896 | 2897 | 1 |
| 2896 | 2898 | 1 |
| 2896 | 2899 | 1 |
| 2900 | 2901 | 1 |
| 2900 | 2902 | 1 |
| 2900 | 2928 | 1 |
| 2902 | 2903 | 1 |
| 2902 | 2904 | 1 |
| 2904 | 2905 | 1 |
| 2904 | 2906 | 1 |
| 2906 | 2907 | 1 |
| 2906 | 2908 | 1 |
| 2906 | 2909 | 1 |
| 2909 | 2910 | 1 |
| 2909 | 2911 | 1 |
| 2909 | 2912 | 1 |
| 2912 | 2913 | 1 |
| 2912 | 2914 | 1 |
| 2912 | 2915 | 1 |
| 2915 | 2916 | 1 |
| 2915 | 2920 | 1 |
| 2915 | 2924 | 1 |
| 2916 | 2917 | 1 |
| 2916 | 2918 | 1 |
| 2916 | 2919 | 1 |
| 2920 | 2921 | 1 |
| 2920 | 2922 | 1 |
| 2920 | 2923 | 1 |
| 2924 | 2925 | 1 |
| 2924 | 2926 | 1 |
| 2924 | 2927 | 1 |
| 2928 | 2929 | 1 |
| 2928 | 2930 | 1 |
| 2928 | 2933 | 1 |
| 2930 | 2931 | 1 |
| 2930 | 2932 | 1 |
| 2933 | 2934 | 1 |
| 2933 | 2935 | 1 |
| 2933 | 2936 | 1 |
| 2936 | 2937 | 1 |

|      |      |   |
|------|------|---|
| 2936 | 2938 | 1 |
| 2936 | 2963 | 1 |
| 2938 | 2939 | 1 |
| 2938 | 2940 | 1 |
| 2938 | 2941 | 1 |
| 2941 | 2942 | 1 |
| 2941 | 2943 | 1 |
| 2941 | 2944 | 1 |
| 2944 | 2945 | 1 |
| 2944 | 2946 | 1 |
| 2944 | 2947 | 1 |
| 2947 | 2948 | 1 |
| 2947 | 2949 | 1 |
| 2947 | 2950 | 1 |
| 2950 | 2951 | 1 |
| 2950 | 2952 | 1 |
| 2950 | 2953 | 1 |
| 2953 | 2954 | 1 |
| 2953 | 2955 | 1 |
| 2953 | 2956 | 1 |
| 2956 | 2957 | 1 |
| 2956 | 2958 | 1 |
| 2956 | 2959 | 1 |
| 2959 | 2960 | 1 |
| 2959 | 2961 | 1 |
| 2959 | 2962 | 1 |
| 2963 | 2964 | 1 |
| 2963 | 2965 | 1 |
| 2963 | 2991 | 1 |
| 2965 | 2966 | 1 |
| 2965 | 2967 | 1 |
| 2967 | 2968 | 1 |
| 2967 | 2969 | 1 |
| 2969 | 2970 | 1 |
| 2969 | 2971 | 1 |
| 2969 | 2972 | 1 |
| 2972 | 2973 | 1 |
| 2972 | 2974 | 1 |
| 2972 | 2975 | 1 |
| 2975 | 2976 | 1 |
| 2975 | 2977 | 1 |
| 2975 | 2978 | 1 |
| 2978 | 2979 | 1 |
| 2978 | 2983 | 1 |
| 2978 | 2987 | 1 |
| 2979 | 2980 | 1 |
| 2979 | 2981 | 1 |
| 2979 | 2982 | 1 |
| 2983 | 2984 | 1 |
| 2983 | 2985 | 1 |
| 2983 | 2986 | 1 |
| 2987 | 2988 | 1 |
| 2987 | 2989 | 1 |
| 2987 | 2990 | 1 |

|      |      |   |
|------|------|---|
| 2991 | 2992 | 1 |
| 2991 | 2993 | 1 |
| 2991 | 2996 | 1 |
| 2993 | 2994 | 1 |
| 2993 | 2995 | 1 |
| 2996 | 2997 | 1 |
| 2996 | 2998 | 1 |
| 2996 | 2999 | 1 |
| 2999 | 3000 | 1 |
| 2999 | 3001 | 1 |
| 2999 | 3026 | 1 |
| 3001 | 3002 | 1 |
| 3001 | 3003 | 1 |
| 3001 | 3004 | 1 |
| 3004 | 3005 | 1 |
| 3004 | 3006 | 1 |
| 3004 | 3007 | 1 |
| 3007 | 3008 | 1 |
| 3007 | 3009 | 1 |
| 3007 | 3010 | 1 |
| 3010 | 3011 | 1 |
| 3010 | 3012 | 1 |
| 3010 | 3013 | 1 |
| 3013 | 3014 | 1 |
| 3013 | 3015 | 1 |
| 3013 | 3016 | 1 |
| 3016 | 3017 | 1 |
| 3016 | 3018 | 1 |
| 3016 | 3019 | 1 |
| 3019 | 3020 | 1 |
| 3019 | 3021 | 1 |
| 3019 | 3022 | 1 |
| 3022 | 3023 | 1 |
| 3022 | 3024 | 1 |
| 3022 | 3025 | 1 |
| 3026 | 3027 | 1 |
| 3026 | 3028 | 1 |
| 3026 | 3054 | 1 |
| 3028 | 3029 | 1 |
| 3028 | 3030 | 1 |
| 3030 | 3031 | 1 |
| 3030 | 3032 | 1 |
| 3032 | 3033 | 1 |
| 3032 | 3034 | 1 |
| 3032 | 3035 | 1 |
| 3035 | 3036 | 1 |
| 3035 | 3037 | 1 |
| 3035 | 3038 | 1 |
| 3038 | 3039 | 1 |
| 3038 | 3040 | 1 |
| 3038 | 3041 | 1 |
| 3041 | 3042 | 1 |
| 3041 | 3046 | 1 |
| 3041 | 3050 | 1 |

|      |      |   |
|------|------|---|
| 3042 | 3043 | 1 |
| 3042 | 3044 | 1 |
| 3042 | 3045 | 1 |
| 3046 | 3047 | 1 |
| 3046 | 3048 | 1 |
| 3046 | 3049 | 1 |
| 3050 | 3051 | 1 |
| 3050 | 3052 | 1 |
| 3050 | 3053 | 1 |
| 3054 | 3055 | 1 |
| 3054 | 3056 | 1 |
| 3054 | 3059 | 1 |
| 3056 | 3057 | 1 |
| 3056 | 3058 | 1 |
| 3059 | 3060 | 1 |
| 3059 | 3061 | 1 |
| 3059 | 3062 | 1 |
| 3062 | 3063 | 1 |
| 3062 | 3064 | 1 |
| 3062 | 3089 | 1 |
| 3064 | 3065 | 1 |
| 3064 | 3066 | 1 |
| 3064 | 3067 | 1 |
| 3067 | 3068 | 1 |
| 3067 | 3069 | 1 |
| 3067 | 3070 | 1 |
| 3070 | 3071 | 1 |
| 3070 | 3072 | 1 |
| 3070 | 3073 | 1 |
| 3073 | 3074 | 1 |
| 3073 | 3075 | 1 |
| 3073 | 3076 | 1 |
| 3076 | 3077 | 1 |
| 3076 | 3078 | 1 |
| 3076 | 3079 | 1 |
| 3079 | 3080 | 1 |
| 3079 | 3081 | 1 |
| 3079 | 3082 | 1 |
| 3082 | 3083 | 1 |
| 3082 | 3084 | 1 |
| 3082 | 3085 | 1 |
| 3085 | 3086 | 1 |
| 3085 | 3087 | 1 |
| 3085 | 3088 | 1 |
| 3089 | 3090 | 1 |
| 3089 | 3091 | 1 |
| 3089 | 3117 | 1 |
| 3091 | 3092 | 1 |
| 3091 | 3093 | 1 |
| 3093 | 3094 | 1 |
| 3093 | 3095 | 1 |
| 3095 | 3096 | 1 |
| 3095 | 3097 | 1 |
| 3095 | 3098 | 1 |

|      |      |   |
|------|------|---|
| 3098 | 3099 | 1 |
| 3098 | 3100 | 1 |
| 3098 | 3101 | 1 |
| 3101 | 3102 | 1 |
| 3101 | 3103 | 1 |
| 3101 | 3104 | 1 |
| 3104 | 3105 | 1 |
| 3104 | 3109 | 1 |
| 3104 | 3113 | 1 |
| 3105 | 3106 | 1 |
| 3105 | 3107 | 1 |
| 3105 | 3108 | 1 |
| 3109 | 3110 | 1 |
| 3109 | 3111 | 1 |
| 3109 | 3112 | 1 |
| 3113 | 3114 | 1 |
| 3113 | 3115 | 1 |
| 3113 | 3116 | 1 |
| 3117 | 3118 | 1 |
| 3117 | 3119 | 1 |
| 3117 | 3122 | 1 |
| 3119 | 3120 | 1 |
| 3119 | 3121 | 1 |
| 3122 | 3123 | 1 |
| 3122 | 3124 | 1 |
| 3122 | 3125 | 1 |
| 3125 | 3126 | 1 |
| 3125 | 3127 | 1 |
| 3125 | 3152 | 1 |
| 3127 | 3128 | 1 |
| 3127 | 3129 | 1 |
| 3127 | 3130 | 1 |
| 3130 | 3131 | 1 |
| 3130 | 3132 | 1 |
| 3130 | 3133 | 1 |
| 3133 | 3134 | 1 |
| 3133 | 3135 | 1 |
| 3133 | 3136 | 1 |
| 3136 | 3137 | 1 |
| 3136 | 3138 | 1 |
| 3136 | 3139 | 1 |
| 3139 | 3140 | 1 |
| 3139 | 3141 | 1 |
| 3139 | 3142 | 1 |
| 3142 | 3143 | 1 |
| 3142 | 3144 | 1 |
| 3142 | 3145 | 1 |
| 3145 | 3146 | 1 |
| 3145 | 3147 | 1 |
| 3145 | 3148 | 1 |
| 3148 | 3149 | 1 |
| 3148 | 3150 | 1 |
| 3148 | 3151 | 1 |
| 3152 | 3153 | 1 |

|      |      |   |
|------|------|---|
| 3152 | 3154 | 1 |
| 3152 | 3180 | 1 |
| 3154 | 3155 | 1 |
| 3154 | 3156 | 1 |
| 3156 | 3157 | 1 |
| 3156 | 3158 | 1 |
| 3158 | 3159 | 1 |
| 3158 | 3160 | 1 |
| 3158 | 3161 | 1 |
| 3161 | 3162 | 1 |
| 3161 | 3163 | 1 |
| 3161 | 3164 | 1 |
| 3164 | 3165 | 1 |
| 3164 | 3166 | 1 |
| 3164 | 3167 | 1 |
| 3167 | 3168 | 1 |
| 3167 | 3172 | 1 |
| 3167 | 3176 | 1 |
| 3168 | 3169 | 1 |
| 3168 | 3170 | 1 |
| 3168 | 3171 | 1 |
| 3172 | 3173 | 1 |
| 3172 | 3174 | 1 |
| 3172 | 3175 | 1 |
| 3176 | 3177 | 1 |
| 3176 | 3178 | 1 |
| 3176 | 3179 | 1 |
| 3180 | 3181 | 1 |
| 3180 | 3182 | 1 |
| 3180 | 3185 | 1 |
| 3182 | 3183 | 1 |
| 3182 | 3184 | 1 |
| 3185 | 3186 | 1 |
| 3185 | 3187 | 1 |
| 3185 | 3188 | 1 |
| 3188 | 3189 | 1 |
| 3188 | 3190 | 1 |
| 3188 | 3215 | 1 |
| 3190 | 3191 | 1 |
| 3190 | 3192 | 1 |
| 3190 | 3193 | 1 |
| 3193 | 3194 | 1 |
| 3193 | 3195 | 1 |
| 3193 | 3196 | 1 |
| 3196 | 3197 | 1 |
| 3196 | 3198 | 1 |
| 3196 | 3199 | 1 |
| 3199 | 3200 | 1 |
| 3199 | 3201 | 1 |
| 3199 | 3202 | 1 |
| 3202 | 3203 | 1 |
| 3202 | 3204 | 1 |
| 3202 | 3205 | 1 |
| 3205 | 3206 | 1 |

|      |      |   |
|------|------|---|
| 3205 | 3207 | 1 |
| 3205 | 3208 | 1 |
| 3208 | 3209 | 1 |
| 3208 | 3210 | 1 |
| 3208 | 3211 | 1 |
| 3211 | 3212 | 1 |
| 3211 | 3213 | 1 |
| 3211 | 3214 | 1 |
| 3215 | 3216 | 1 |
| 3215 | 3217 | 1 |
| 3215 | 3243 | 1 |
| 3217 | 3218 | 1 |
| 3217 | 3219 | 1 |
| 3219 | 3220 | 1 |
| 3219 | 3221 | 1 |
| 3221 | 3222 | 1 |
| 3221 | 3223 | 1 |
| 3221 | 3224 | 1 |
| 3224 | 3225 | 1 |
| 3224 | 3226 | 1 |
| 3224 | 3227 | 1 |
| 3227 | 3228 | 1 |
| 3227 | 3229 | 1 |
| 3227 | 3230 | 1 |
| 3230 | 3231 | 1 |
| 3230 | 3235 | 1 |
| 3230 | 3239 | 1 |
| 3231 | 3232 | 1 |
| 3231 | 3233 | 1 |
| 3231 | 3234 | 1 |
| 3235 | 3236 | 1 |
| 3235 | 3237 | 1 |
| 3235 | 3238 | 1 |
| 3239 | 3240 | 1 |
| 3239 | 3241 | 1 |
| 3239 | 3242 | 1 |
| 3243 | 3244 | 1 |
| 3243 | 3245 | 1 |
| 3243 | 3248 | 1 |
| 3245 | 3246 | 1 |
| 3245 | 3247 | 1 |
| 3248 | 3249 | 1 |
| 3248 | 3250 | 1 |
| 3248 | 3251 | 1 |
| 3251 | 3252 | 1 |
| 3251 | 3253 | 1 |
| 3251 | 3254 | 1 |
| 3254 | 3255 | 1 |
| 3254 | 3256 | 1 |
| 3254 | 3257 | 1 |
| 3257 | 3258 | 1 |
| 3257 | 3259 | 1 |
| 3257 | 3260 | 1 |
| 3260 | 3261 | 1 |

|      |      |   |
|------|------|---|
| 3260 | 3262 | 1 |
| 3260 | 3263 | 1 |
| 3263 | 3264 | 1 |
| 3263 | 3265 | 1 |
| 3263 | 3266 | 1 |
| 3266 | 3267 | 1 |
| 3266 | 3268 | 1 |
| 3266 | 3269 | 1 |
| 3269 | 3270 | 1 |
| 3269 | 3271 | 1 |
| 3269 | 3272 | 1 |
| 3272 | 3273 | 1 |
| 3272 | 3274 | 1 |
| 3272 | 3275 | 1 |
| 3275 | 3276 | 1 |
| 3275 | 3277 | 1 |
| 3275 | 3278 | 1 |

[ pairs ]

|    | ai | aj | funct |
|----|----|----|-------|
| c3 | 1  | 7  | 1     |
|    | 1  | 8  | 1     |
|    | 1  | 33 | 1     |
|    | 1  | 34 | 1     |
|    | 1  | 36 | 1     |
|    | 1  | 37 | 1     |
|    | 1  | 38 | 1     |
|    | 2  | 5  | 1     |
|    | 2  | 6  | 1     |
|    | 2  | 31 | 1     |
|    | 2  | 32 | 1     |
|    | 2  | 35 | 1     |
|    | 3  | 5  | 1     |
|    | 3  | 6  | 1     |
|    | 3  | 31 | 1     |
|    | 3  | 32 | 1     |
|    | 3  | 35 | 1     |
|    | 4  | 9  | 1     |
|    | 4  | 10 | 1     |
|    | 4  | 11 | 1     |
|    | 4  | 31 | 1     |
|    | 4  | 32 | 1     |
|    | 4  | 35 | 1     |
|    | 5  | 7  | 1     |
|    | 5  | 8  | 1     |
|    | 5  | 30 | 1     |
|    | 6  | 12 | 1     |
|    | 6  | 13 | 1     |
|    | 6  | 14 | 1     |
|    | 6  | 30 | 1     |
|    | 7  | 9  | 1     |
|    | 7  | 10 | 1     |
|    | 7  | 11 | 1     |

c0

c1

c2



|    |    |   |
|----|----|---|
| 8  | 15 | 1 |
| 8  | 16 | 1 |
| 8  | 17 | 1 |
| 9  | 12 | 1 |
| 9  | 13 | 1 |
| 9  | 14 | 1 |
| 10 | 12 | 1 |
| 10 | 13 | 1 |
| 10 | 14 | 1 |
| 11 | 18 | 1 |
| 11 | 22 | 1 |
| 11 | 26 | 1 |
| 12 | 15 | 1 |
| 12 | 16 | 1 |
| 12 | 17 | 1 |
| 13 | 15 | 1 |
| 13 | 16 | 1 |
| 13 | 17 | 1 |
| 14 | 19 | 1 |
| 14 | 20 | 1 |
| 14 | 21 | 1 |
| 14 | 23 | 1 |
| 14 | 24 | 1 |
| 14 | 25 | 1 |
| 14 | 27 | 1 |
| 14 | 28 | 1 |
| 14 | 29 | 1 |
| 15 | 18 | 1 |
| 15 | 22 | 1 |
| 15 | 26 | 1 |
| 16 | 18 | 1 |
| 16 | 22 | 1 |
| 16 | 26 | 1 |
| 18 | 23 | 1 |
| 18 | 24 | 1 |
| 18 | 25 | 1 |
| 18 | 27 | 1 |
| 18 | 28 | 1 |
| 18 | 29 | 1 |
| 19 | 22 | 1 |
| 19 | 26 | 1 |
| 20 | 22 | 1 |
| 20 | 26 | 1 |
| 21 | 22 | 1 |
| 21 | 26 | 1 |
| 22 | 27 | 1 |
| 22 | 28 | 1 |
| 22 | 29 | 1 |
| 23 | 26 | 1 |
| 24 | 26 | 1 |
| 25 | 26 | 1 |
| 30 | 39 | 1 |
| 30 | 40 | 1 |
| 30 | 65 | 1 |

|    |    |   |
|----|----|---|
| 31 | 33 | 1 |
| 31 | 34 | 1 |
| 31 | 36 | 1 |
| 31 | 37 | 1 |
| 31 | 38 | 1 |
| 32 | 36 | 1 |
| 32 | 37 | 1 |
| 32 | 38 | 1 |
| 33 | 35 | 1 |
| 34 | 35 | 1 |
| 35 | 41 | 1 |
| 35 | 42 | 1 |
| 35 | 43 | 1 |
| 35 | 66 | 1 |
| 35 | 67 | 1 |
| 35 | 93 | 1 |
| 36 | 39 | 1 |
| 36 | 40 | 1 |
| 36 | 65 | 1 |
| 37 | 39 | 1 |
| 37 | 40 | 1 |
| 37 | 65 | 1 |
| 38 | 44 | 1 |
| 38 | 45 | 1 |
| 38 | 46 | 1 |
| 38 | 68 | 1 |
| 38 | 69 | 1 |
| 38 | 94 | 1 |
| 38 | 95 | 1 |
| 38 | 98 | 1 |
| 39 | 41 | 1 |
| 39 | 42 | 1 |
| 39 | 43 | 1 |
| 39 | 66 | 1 |
| 39 | 67 | 1 |
| 39 | 93 | 1 |
| 40 | 47 | 1 |
| 40 | 48 | 1 |
| 40 | 49 | 1 |
| 40 | 66 | 1 |
| 40 | 67 | 1 |
| 40 | 93 | 1 |
| 41 | 44 | 1 |
| 41 | 45 | 1 |
| 41 | 46 | 1 |
| 41 | 65 | 1 |
| 42 | 44 | 1 |
| 42 | 45 | 1 |
| 42 | 46 | 1 |
| 42 | 65 | 1 |
| 43 | 50 | 1 |
| 43 | 51 | 1 |
| 43 | 52 | 1 |
| 43 | 65 | 1 |

|    |     |   |
|----|-----|---|
| 44 | 47  | 1 |
| 44 | 48  | 1 |
| 44 | 49  | 1 |
| 45 | 47  | 1 |
| 45 | 48  | 1 |
| 45 | 49  | 1 |
| 46 | 53  | 1 |
| 46 | 54  | 1 |
| 46 | 55  | 1 |
| 47 | 50  | 1 |
| 47 | 51  | 1 |
| 47 | 52  | 1 |
| 48 | 50  | 1 |
| 48 | 51  | 1 |
| 48 | 52  | 1 |
| 49 | 56  | 1 |
| 49 | 57  | 1 |
| 49 | 58  | 1 |
| 50 | 53  | 1 |
| 50 | 54  | 1 |
| 50 | 55  | 1 |
| 51 | 53  | 1 |
| 51 | 54  | 1 |
| 51 | 55  | 1 |
| 52 | 59  | 1 |
| 52 | 60  | 1 |
| 52 | 61  | 1 |
| 53 | 56  | 1 |
| 53 | 57  | 1 |
| 53 | 58  | 1 |
| 54 | 56  | 1 |
| 54 | 57  | 1 |
| 54 | 58  | 1 |
| 55 | 62  | 1 |
| 55 | 63  | 1 |
| 55 | 64  | 1 |
| 56 | 59  | 1 |
| 56 | 60  | 1 |
| 56 | 61  | 1 |
| 57 | 59  | 1 |
| 57 | 60  | 1 |
| 57 | 61  | 1 |
| 59 | 62  | 1 |
| 59 | 63  | 1 |
| 59 | 64  | 1 |
| 60 | 62  | 1 |
| 60 | 63  | 1 |
| 60 | 64  | 1 |
| 65 | 70  | 1 |
| 65 | 71  | 1 |
| 65 | 96  | 1 |
| 65 | 97  | 1 |
| 65 | 99  | 1 |
| 65 | 100 | 1 |

|    |     |   |
|----|-----|---|
| 65 | 101 | 1 |
| 66 | 68  | 1 |
| 66 | 69  | 1 |
| 66 | 94  | 1 |
| 66 | 95  | 1 |
| 66 | 98  | 1 |
| 67 | 72  | 1 |
| 67 | 73  | 1 |
| 67 | 74  | 1 |
| 67 | 94  | 1 |
| 67 | 95  | 1 |
| 67 | 98  | 1 |
| 68 | 70  | 1 |
| 68 | 71  | 1 |
| 68 | 93  | 1 |
| 69 | 75  | 1 |
| 69 | 76  | 1 |
| 69 | 77  | 1 |
| 69 | 93  | 1 |
| 70 | 72  | 1 |
| 70 | 73  | 1 |
| 70 | 74  | 1 |
| 71 | 78  | 1 |
| 71 | 79  | 1 |
| 71 | 80  | 1 |
| 72 | 75  | 1 |
| 72 | 76  | 1 |
| 72 | 77  | 1 |
| 73 | 75  | 1 |
| 73 | 76  | 1 |
| 73 | 77  | 1 |
| 74 | 81  | 1 |
| 74 | 85  | 1 |
| 74 | 89  | 1 |
| 75 | 78  | 1 |
| 75 | 79  | 1 |
| 75 | 80  | 1 |
| 76 | 78  | 1 |
| 76 | 79  | 1 |
| 76 | 80  | 1 |
| 77 | 82  | 1 |
| 77 | 83  | 1 |
| 77 | 84  | 1 |
| 77 | 86  | 1 |
| 77 | 87  | 1 |
| 77 | 88  | 1 |
| 77 | 90  | 1 |
| 77 | 91  | 1 |
| 77 | 92  | 1 |
| 78 | 81  | 1 |
| 78 | 85  | 1 |
| 78 | 89  | 1 |
| 79 | 81  | 1 |
| 79 | 85  | 1 |

|     |     |   |
|-----|-----|---|
| 79  | 89  | 1 |
| 81  | 86  | 1 |
| 81  | 87  | 1 |
| 81  | 88  | 1 |
| 81  | 90  | 1 |
| 81  | 91  | 1 |
| 81  | 92  | 1 |
| 82  | 85  | 1 |
| 82  | 89  | 1 |
| 83  | 85  | 1 |
| 83  | 89  | 1 |
| 84  | 85  | 1 |
| 84  | 89  | 1 |
| 85  | 90  | 1 |
| 85  | 91  | 1 |
| 85  | 92  | 1 |
| 86  | 89  | 1 |
| 87  | 89  | 1 |
| 88  | 89  | 1 |
| 93  | 102 | 1 |
| 93  | 103 | 1 |
| 93  | 128 | 1 |
| 94  | 96  | 1 |
| 94  | 97  | 1 |
| 94  | 99  | 1 |
| 94  | 100 | 1 |
| 94  | 101 | 1 |
| 95  | 99  | 1 |
| 95  | 100 | 1 |
| 95  | 101 | 1 |
| 96  | 98  | 1 |
| 97  | 98  | 1 |
| 98  | 104 | 1 |
| 98  | 105 | 1 |
| 98  | 106 | 1 |
| 98  | 129 | 1 |
| 98  | 130 | 1 |
| 98  | 156 | 1 |
| 99  | 102 | 1 |
| 99  | 103 | 1 |
| 99  | 128 | 1 |
| 100 | 102 | 1 |
| 100 | 103 | 1 |
| 100 | 128 | 1 |
| 101 | 107 | 1 |
| 101 | 108 | 1 |
| 101 | 109 | 1 |
| 101 | 131 | 1 |
| 101 | 132 | 1 |
| 101 | 157 | 1 |
| 101 | 158 | 1 |
| 101 | 161 | 1 |
| 102 | 104 | 1 |
| 102 | 105 | 1 |

|     |     |   |
|-----|-----|---|
| 102 | 106 | 1 |
| 102 | 129 | 1 |
| 102 | 130 | 1 |
| 102 | 156 | 1 |
| 103 | 110 | 1 |
| 103 | 111 | 1 |
| 103 | 112 | 1 |
| 103 | 129 | 1 |
| 103 | 130 | 1 |
| 103 | 156 | 1 |
| 104 | 107 | 1 |
| 104 | 108 | 1 |
| 104 | 109 | 1 |
| 104 | 128 | 1 |
| 105 | 107 | 1 |
| 105 | 108 | 1 |
| 105 | 109 | 1 |
| 105 | 128 | 1 |
| 106 | 113 | 1 |
| 106 | 114 | 1 |
| 106 | 115 | 1 |
| 106 | 128 | 1 |
| 107 | 110 | 1 |
| 107 | 111 | 1 |
| 107 | 112 | 1 |
| 108 | 110 | 1 |
| 108 | 111 | 1 |
| 108 | 112 | 1 |
| 109 | 116 | 1 |
| 109 | 117 | 1 |
| 109 | 118 | 1 |
| 110 | 113 | 1 |
| 110 | 114 | 1 |
| 110 | 115 | 1 |
| 111 | 113 | 1 |
| 111 | 114 | 1 |
| 111 | 115 | 1 |
| 112 | 119 | 1 |
| 112 | 120 | 1 |
| 112 | 121 | 1 |
| 113 | 116 | 1 |
| 113 | 117 | 1 |
| 113 | 118 | 1 |
| 114 | 116 | 1 |
| 114 | 117 | 1 |
| 114 | 118 | 1 |
| 115 | 122 | 1 |
| 115 | 123 | 1 |
| 115 | 124 | 1 |
| 116 | 119 | 1 |
| 116 | 120 | 1 |
| 116 | 121 | 1 |
| 117 | 119 | 1 |
| 117 | 120 | 1 |

|     |     |   |
|-----|-----|---|
| 117 | 121 | 1 |
| 118 | 125 | 1 |
| 118 | 126 | 1 |
| 118 | 127 | 1 |
| 119 | 122 | 1 |
| 119 | 123 | 1 |
| 119 | 124 | 1 |
| 120 | 122 | 1 |
| 120 | 123 | 1 |
| 120 | 124 | 1 |
| 122 | 125 | 1 |
| 122 | 126 | 1 |
| 122 | 127 | 1 |
| 123 | 125 | 1 |
| 123 | 126 | 1 |
| 123 | 127 | 1 |
| 128 | 133 | 1 |
| 128 | 134 | 1 |
| 128 | 159 | 1 |
| 128 | 160 | 1 |
| 128 | 162 | 1 |
| 128 | 163 | 1 |
| 128 | 164 | 1 |
| 129 | 131 | 1 |
| 129 | 132 | 1 |
| 129 | 157 | 1 |
| 129 | 158 | 1 |
| 129 | 161 | 1 |
| 130 | 135 | 1 |
| 130 | 136 | 1 |
| 130 | 137 | 1 |
| 130 | 157 | 1 |
| 130 | 158 | 1 |
| 130 | 161 | 1 |
| 131 | 133 | 1 |
| 131 | 134 | 1 |
| 131 | 156 | 1 |
| 132 | 138 | 1 |
| 132 | 139 | 1 |
| 132 | 140 | 1 |
| 132 | 156 | 1 |
| 133 | 135 | 1 |
| 133 | 136 | 1 |
| 133 | 137 | 1 |
| 134 | 141 | 1 |
| 134 | 142 | 1 |
| 134 | 143 | 1 |
| 135 | 138 | 1 |
| 135 | 139 | 1 |
| 135 | 140 | 1 |
| 136 | 138 | 1 |
| 136 | 139 | 1 |
| 136 | 140 | 1 |
| 137 | 144 | 1 |

|     |     |   |
|-----|-----|---|
| 137 | 148 | 1 |
| 137 | 152 | 1 |
| 138 | 141 | 1 |
| 138 | 142 | 1 |
| 138 | 143 | 1 |
| 139 | 141 | 1 |
| 139 | 142 | 1 |
| 139 | 143 | 1 |
| 140 | 145 | 1 |
| 140 | 146 | 1 |
| 140 | 147 | 1 |
| 140 | 149 | 1 |
| 140 | 150 | 1 |
| 140 | 151 | 1 |
| 140 | 153 | 1 |
| 140 | 154 | 1 |
| 140 | 155 | 1 |
| 141 | 144 | 1 |
| 141 | 148 | 1 |
| 141 | 152 | 1 |
| 142 | 144 | 1 |
| 142 | 148 | 1 |
| 142 | 152 | 1 |
| 144 | 149 | 1 |
| 144 | 150 | 1 |
| 144 | 151 | 1 |
| 144 | 153 | 1 |
| 144 | 154 | 1 |
| 144 | 155 | 1 |
| 145 | 148 | 1 |
| 145 | 152 | 1 |
| 146 | 148 | 1 |
| 146 | 152 | 1 |
| 147 | 148 | 1 |
| 147 | 152 | 1 |
| 148 | 153 | 1 |
| 148 | 154 | 1 |
| 148 | 155 | 1 |
| 149 | 152 | 1 |
| 150 | 152 | 1 |
| 151 | 152 | 1 |
| 156 | 165 | 1 |
| 156 | 166 | 1 |
| 156 | 191 | 1 |
| 157 | 159 | 1 |
| 157 | 160 | 1 |
| 157 | 162 | 1 |
| 157 | 163 | 1 |
| 157 | 164 | 1 |
| 158 | 162 | 1 |
| 158 | 163 | 1 |
| 158 | 164 | 1 |
| 159 | 161 | 1 |
| 160 | 161 | 1 |



|     |     |   |
|-----|-----|---|
| 161 | 167 | 1 |
| 161 | 168 | 1 |
| 161 | 169 | 1 |
| 161 | 192 | 1 |
| 161 | 193 | 1 |
| 161 | 219 | 1 |
| 162 | 165 | 1 |
| 162 | 166 | 1 |
| 162 | 191 | 1 |
| 163 | 165 | 1 |
| 163 | 166 | 1 |
| 163 | 191 | 1 |
| 164 | 170 | 1 |
| 164 | 171 | 1 |
| 164 | 172 | 1 |
| 164 | 194 | 1 |
| 164 | 195 | 1 |
| 164 | 220 | 1 |
| 164 | 221 | 1 |
| 164 | 224 | 1 |
| 165 | 167 | 1 |
| 165 | 168 | 1 |
| 165 | 169 | 1 |
| 165 | 192 | 1 |
| 165 | 193 | 1 |
| 165 | 219 | 1 |
| 166 | 173 | 1 |
| 166 | 174 | 1 |
| 166 | 175 | 1 |
| 166 | 192 | 1 |
| 166 | 193 | 1 |
| 166 | 219 | 1 |
| 167 | 170 | 1 |
| 167 | 171 | 1 |
| 167 | 172 | 1 |
| 167 | 191 | 1 |
| 168 | 170 | 1 |
| 168 | 171 | 1 |
| 168 | 172 | 1 |
| 168 | 191 | 1 |
| 169 | 176 | 1 |
| 169 | 177 | 1 |
| 169 | 178 | 1 |
| 169 | 191 | 1 |
| 170 | 173 | 1 |
| 170 | 174 | 1 |
| 170 | 175 | 1 |
| 171 | 173 | 1 |
| 171 | 174 | 1 |
| 171 | 175 | 1 |
| 172 | 179 | 1 |
| 172 | 180 | 1 |
| 172 | 181 | 1 |
| 173 | 176 | 1 |

|     |     |   |
|-----|-----|---|
| 173 | 177 | 1 |
| 173 | 178 | 1 |
| 174 | 176 | 1 |
| 174 | 177 | 1 |
| 174 | 178 | 1 |
| 175 | 182 | 1 |
| 175 | 183 | 1 |
| 175 | 184 | 1 |
| 176 | 179 | 1 |
| 176 | 180 | 1 |
| 176 | 181 | 1 |
| 177 | 179 | 1 |
| 177 | 180 | 1 |
| 177 | 181 | 1 |
| 178 | 185 | 1 |
| 178 | 186 | 1 |
| 178 | 187 | 1 |
| 179 | 182 | 1 |
| 179 | 183 | 1 |
| 179 | 184 | 1 |
| 180 | 182 | 1 |
| 180 | 183 | 1 |
| 180 | 184 | 1 |
| 181 | 188 | 1 |
| 181 | 189 | 1 |
| 181 | 190 | 1 |
| 182 | 185 | 1 |
| 182 | 186 | 1 |
| 182 | 187 | 1 |
| 183 | 185 | 1 |
| 183 | 186 | 1 |
| 183 | 187 | 1 |
| 185 | 188 | 1 |
| 185 | 189 | 1 |
| 185 | 190 | 1 |
| 186 | 188 | 1 |
| 186 | 189 | 1 |
| 186 | 190 | 1 |
| 191 | 196 | 1 |
| 191 | 197 | 1 |
| 191 | 222 | 1 |
| 191 | 223 | 1 |
| 191 | 225 | 1 |
| 191 | 226 | 1 |
| 191 | 227 | 1 |
| 192 | 194 | 1 |
| 192 | 195 | 1 |
| 192 | 220 | 1 |
| 192 | 221 | 1 |
| 192 | 224 | 1 |
| 193 | 198 | 1 |
| 193 | 199 | 1 |
| 193 | 200 | 1 |
| 193 | 220 | 1 |

|     |     |   |
|-----|-----|---|
| 193 | 221 | 1 |
| 193 | 224 | 1 |
| 194 | 196 | 1 |
| 194 | 197 | 1 |
| 194 | 219 | 1 |
| 195 | 201 | 1 |
| 195 | 202 | 1 |
| 195 | 203 | 1 |
| 195 | 219 | 1 |
| 196 | 198 | 1 |
| 196 | 199 | 1 |
| 196 | 200 | 1 |
| 197 | 204 | 1 |
| 197 | 205 | 1 |
| 197 | 206 | 1 |
| 198 | 201 | 1 |
| 198 | 202 | 1 |
| 198 | 203 | 1 |
| 199 | 201 | 1 |
| 199 | 202 | 1 |
| 199 | 203 | 1 |
| 200 | 207 | 1 |
| 200 | 211 | 1 |
| 200 | 215 | 1 |
| 201 | 204 | 1 |
| 201 | 205 | 1 |
| 201 | 206 | 1 |
| 202 | 204 | 1 |
| 202 | 205 | 1 |
| 202 | 206 | 1 |
| 203 | 208 | 1 |
| 203 | 209 | 1 |
| 203 | 210 | 1 |
| 203 | 212 | 1 |
| 203 | 213 | 1 |
| 203 | 214 | 1 |
| 203 | 216 | 1 |
| 203 | 217 | 1 |
| 203 | 218 | 1 |
| 204 | 207 | 1 |
| 204 | 211 | 1 |
| 204 | 215 | 1 |
| 205 | 207 | 1 |
| 205 | 211 | 1 |
| 205 | 215 | 1 |
| 207 | 212 | 1 |
| 207 | 213 | 1 |
| 207 | 214 | 1 |
| 207 | 216 | 1 |
| 207 | 217 | 1 |
| 207 | 218 | 1 |
| 208 | 211 | 1 |
| 208 | 215 | 1 |
| 209 | 211 | 1 |

|     |     |   |
|-----|-----|---|
| 209 | 215 | 1 |
| 210 | 211 | 1 |
| 210 | 215 | 1 |
| 211 | 216 | 1 |
| 211 | 217 | 1 |
| 211 | 218 | 1 |
| 212 | 215 | 1 |
| 213 | 215 | 1 |
| 214 | 215 | 1 |
| 219 | 228 | 1 |
| 219 | 229 | 1 |
| 219 | 254 | 1 |
| 220 | 222 | 1 |
| 220 | 223 | 1 |
| 220 | 225 | 1 |
| 220 | 226 | 1 |
| 220 | 227 | 1 |
| 221 | 225 | 1 |
| 221 | 226 | 1 |
| 221 | 227 | 1 |
| 222 | 224 | 1 |
| 223 | 224 | 1 |
| 224 | 230 | 1 |
| 224 | 231 | 1 |
| 224 | 232 | 1 |
| 224 | 255 | 1 |
| 224 | 256 | 1 |
| 224 | 282 | 1 |
| 225 | 228 | 1 |
| 225 | 229 | 1 |
| 225 | 254 | 1 |
| 226 | 228 | 1 |
| 226 | 229 | 1 |
| 226 | 254 | 1 |
| 227 | 233 | 1 |
| 227 | 234 | 1 |
| 227 | 235 | 1 |
| 227 | 257 | 1 |
| 227 | 258 | 1 |
| 227 | 283 | 1 |
| 227 | 284 | 1 |
| 227 | 287 | 1 |
| 228 | 230 | 1 |
| 228 | 231 | 1 |
| 228 | 232 | 1 |
| 228 | 255 | 1 |
| 228 | 256 | 1 |
| 228 | 282 | 1 |
| 229 | 236 | 1 |
| 229 | 237 | 1 |
| 229 | 238 | 1 |
| 229 | 255 | 1 |
| 229 | 256 | 1 |
| 229 | 282 | 1 |

|     |     |   |
|-----|-----|---|
| 230 | 233 | 1 |
| 230 | 234 | 1 |
| 230 | 235 | 1 |
| 230 | 254 | 1 |
| 231 | 233 | 1 |
| 231 | 234 | 1 |
| 231 | 235 | 1 |
| 231 | 254 | 1 |
| 232 | 239 | 1 |
| 232 | 240 | 1 |
| 232 | 241 | 1 |
| 232 | 254 | 1 |
| 233 | 236 | 1 |
| 233 | 237 | 1 |
| 233 | 238 | 1 |
| 234 | 236 | 1 |
| 234 | 237 | 1 |
| 234 | 238 | 1 |
| 235 | 242 | 1 |
| 235 | 243 | 1 |
| 235 | 244 | 1 |
| 236 | 239 | 1 |
| 236 | 240 | 1 |
| 236 | 241 | 1 |
| 237 | 239 | 1 |
| 237 | 240 | 1 |
| 237 | 241 | 1 |
| 238 | 245 | 1 |
| 238 | 246 | 1 |
| 238 | 247 | 1 |
| 239 | 242 | 1 |
| 239 | 243 | 1 |
| 239 | 244 | 1 |
| 240 | 242 | 1 |
| 240 | 243 | 1 |
| 240 | 244 | 1 |
| 241 | 248 | 1 |
| 241 | 249 | 1 |
| 241 | 250 | 1 |
| 242 | 245 | 1 |
| 242 | 246 | 1 |
| 242 | 247 | 1 |
| 243 | 245 | 1 |
| 243 | 246 | 1 |
| 243 | 247 | 1 |
| 244 | 251 | 1 |
| 244 | 252 | 1 |
| 244 | 253 | 1 |
| 245 | 248 | 1 |
| 245 | 249 | 1 |
| 245 | 250 | 1 |
| 246 | 248 | 1 |
| 246 | 249 | 1 |
| 246 | 250 | 1 |

|     |     |   |
|-----|-----|---|
| 248 | 251 | 1 |
| 248 | 252 | 1 |
| 248 | 253 | 1 |
| 249 | 251 | 1 |
| 249 | 252 | 1 |
| 249 | 253 | 1 |
| 254 | 259 | 1 |
| 254 | 260 | 1 |
| 254 | 285 | 1 |
| 254 | 286 | 1 |
| 254 | 288 | 1 |
| 254 | 289 | 1 |
| 254 | 290 | 1 |
| 255 | 257 | 1 |
| 255 | 258 | 1 |
| 255 | 283 | 1 |
| 255 | 284 | 1 |
| 255 | 287 | 1 |
| 256 | 261 | 1 |
| 256 | 262 | 1 |
| 256 | 263 | 1 |
| 256 | 283 | 1 |
| 256 | 284 | 1 |
| 256 | 287 | 1 |
| 257 | 259 | 1 |
| 257 | 260 | 1 |
| 257 | 282 | 1 |
| 258 | 264 | 1 |
| 258 | 265 | 1 |
| 258 | 266 | 1 |
| 258 | 282 | 1 |
| 259 | 261 | 1 |
| 259 | 262 | 1 |
| 259 | 263 | 1 |
| 260 | 267 | 1 |
| 260 | 268 | 1 |
| 260 | 269 | 1 |
| 261 | 264 | 1 |
| 261 | 265 | 1 |
| 261 | 266 | 1 |
| 262 | 264 | 1 |
| 262 | 265 | 1 |
| 262 | 266 | 1 |
| 263 | 270 | 1 |
| 263 | 274 | 1 |
| 263 | 278 | 1 |
| 264 | 267 | 1 |
| 264 | 268 | 1 |
| 264 | 269 | 1 |
| 265 | 267 | 1 |
| 265 | 268 | 1 |
| 265 | 269 | 1 |
| 266 | 271 | 1 |
| 266 | 272 | 1 |

|     |     |   |
|-----|-----|---|
| 266 | 273 | 1 |
| 266 | 275 | 1 |
| 266 | 276 | 1 |
| 266 | 277 | 1 |
| 266 | 279 | 1 |
| 266 | 280 | 1 |
| 266 | 281 | 1 |
| 267 | 270 | 1 |
| 267 | 274 | 1 |
| 267 | 278 | 1 |
| 268 | 270 | 1 |
| 268 | 274 | 1 |
| 268 | 278 | 1 |
| 270 | 275 | 1 |
| 270 | 276 | 1 |
| 270 | 277 | 1 |
| 270 | 279 | 1 |
| 270 | 280 | 1 |
| 270 | 281 | 1 |
| 271 | 274 | 1 |
| 271 | 278 | 1 |
| 272 | 274 | 1 |
| 272 | 278 | 1 |
| 273 | 274 | 1 |
| 273 | 278 | 1 |
| 274 | 279 | 1 |
| 274 | 280 | 1 |
| 274 | 281 | 1 |
| 275 | 278 | 1 |
| 276 | 278 | 1 |
| 277 | 278 | 1 |
| 282 | 291 | 1 |
| 282 | 292 | 1 |
| 282 | 317 | 1 |
| 283 | 285 | 1 |
| 283 | 286 | 1 |
| 283 | 288 | 1 |
| 283 | 289 | 1 |
| 283 | 290 | 1 |
| 284 | 288 | 1 |
| 284 | 289 | 1 |
| 284 | 290 | 1 |
| 285 | 287 | 1 |
| 286 | 287 | 1 |
| 287 | 293 | 1 |
| 287 | 294 | 1 |
| 287 | 295 | 1 |
| 287 | 318 | 1 |
| 287 | 319 | 1 |
| 287 | 345 | 1 |
| 288 | 291 | 1 |
| 288 | 292 | 1 |
| 288 | 317 | 1 |
| 289 | 291 | 1 |

|     |     |   |
|-----|-----|---|
| 289 | 292 | 1 |
| 289 | 317 | 1 |
| 290 | 296 | 1 |
| 290 | 297 | 1 |
| 290 | 298 | 1 |
| 290 | 320 | 1 |
| 290 | 321 | 1 |
| 290 | 346 | 1 |
| 290 | 347 | 1 |
| 290 | 350 | 1 |
| 291 | 293 | 1 |
| 291 | 294 | 1 |
| 291 | 295 | 1 |
| 291 | 318 | 1 |
| 291 | 319 | 1 |
| 291 | 345 | 1 |
| 292 | 299 | 1 |
| 292 | 300 | 1 |
| 292 | 301 | 1 |
| 292 | 318 | 1 |
| 292 | 319 | 1 |
| 292 | 345 | 1 |
| 293 | 296 | 1 |
| 293 | 297 | 1 |
| 293 | 298 | 1 |
| 293 | 317 | 1 |
| 294 | 296 | 1 |
| 294 | 297 | 1 |
| 294 | 298 | 1 |
| 294 | 317 | 1 |
| 295 | 302 | 1 |
| 295 | 303 | 1 |
| 295 | 304 | 1 |
| 295 | 317 | 1 |
| 296 | 299 | 1 |
| 296 | 300 | 1 |
| 296 | 301 | 1 |
| 297 | 299 | 1 |
| 297 | 300 | 1 |
| 297 | 301 | 1 |
| 298 | 305 | 1 |
| 298 | 306 | 1 |
| 298 | 307 | 1 |
| 299 | 302 | 1 |
| 299 | 303 | 1 |
| 299 | 304 | 1 |
| 300 | 302 | 1 |
| 300 | 303 | 1 |
| 300 | 304 | 1 |
| 301 | 308 | 1 |
| 301 | 309 | 1 |
| 301 | 310 | 1 |
| 302 | 305 | 1 |
| 302 | 306 | 1 |



|     |     |   |
|-----|-----|---|
| 302 | 307 | 1 |
| 303 | 305 | 1 |
| 303 | 306 | 1 |
| 303 | 307 | 1 |
| 304 | 311 | 1 |
| 304 | 312 | 1 |
| 304 | 313 | 1 |
| 305 | 308 | 1 |
| 305 | 309 | 1 |
| 305 | 310 | 1 |
| 306 | 308 | 1 |
| 306 | 309 | 1 |
| 306 | 310 | 1 |
| 307 | 314 | 1 |
| 307 | 315 | 1 |
| 307 | 316 | 1 |
| 308 | 311 | 1 |
| 308 | 312 | 1 |
| 308 | 313 | 1 |
| 309 | 311 | 1 |
| 309 | 312 | 1 |
| 309 | 313 | 1 |
| 311 | 314 | 1 |
| 311 | 315 | 1 |
| 311 | 316 | 1 |
| 312 | 314 | 1 |
| 312 | 315 | 1 |
| 312 | 316 | 1 |
| 317 | 322 | 1 |
| 317 | 323 | 1 |
| 317 | 348 | 1 |
| 317 | 349 | 1 |
| 317 | 351 | 1 |
| 317 | 352 | 1 |
| 317 | 353 | 1 |
| 318 | 320 | 1 |
| 318 | 321 | 1 |
| 318 | 346 | 1 |
| 318 | 347 | 1 |
| 318 | 350 | 1 |
| 319 | 324 | 1 |
| 319 | 325 | 1 |
| 319 | 326 | 1 |
| 319 | 346 | 1 |
| 319 | 347 | 1 |
| 319 | 350 | 1 |
| 320 | 322 | 1 |
| 320 | 323 | 1 |
| 320 | 345 | 1 |
| 321 | 327 | 1 |
| 321 | 328 | 1 |
| 321 | 329 | 1 |
| 321 | 345 | 1 |
| 322 | 324 | 1 |

|     |     |   |
|-----|-----|---|
| 322 | 325 | 1 |
| 322 | 326 | 1 |
| 323 | 330 | 1 |
| 323 | 331 | 1 |
| 323 | 332 | 1 |
| 324 | 327 | 1 |
| 324 | 328 | 1 |
| 324 | 329 | 1 |
| 325 | 327 | 1 |
| 325 | 328 | 1 |
| 325 | 329 | 1 |
| 326 | 333 | 1 |
| 326 | 337 | 1 |
| 326 | 341 | 1 |
| 327 | 330 | 1 |
| 327 | 331 | 1 |
| 327 | 332 | 1 |
| 328 | 330 | 1 |
| 328 | 331 | 1 |
| 328 | 332 | 1 |
| 329 | 334 | 1 |
| 329 | 335 | 1 |
| 329 | 336 | 1 |
| 329 | 338 | 1 |
| 329 | 339 | 1 |
| 329 | 340 | 1 |
| 329 | 342 | 1 |
| 329 | 343 | 1 |
| 329 | 344 | 1 |
| 330 | 333 | 1 |
| 330 | 337 | 1 |
| 330 | 341 | 1 |
| 331 | 333 | 1 |
| 331 | 337 | 1 |
| 331 | 341 | 1 |
| 333 | 338 | 1 |
| 333 | 339 | 1 |
| 333 | 340 | 1 |
| 333 | 342 | 1 |
| 333 | 343 | 1 |
| 333 | 344 | 1 |
| 334 | 337 | 1 |
| 334 | 341 | 1 |
| 335 | 337 | 1 |
| 335 | 341 | 1 |
| 336 | 337 | 1 |
| 336 | 341 | 1 |
| 337 | 342 | 1 |
| 337 | 343 | 1 |
| 337 | 344 | 1 |
| 338 | 341 | 1 |
| 339 | 341 | 1 |
| 340 | 341 | 1 |
| 345 | 354 | 1 |

|     |     |   |
|-----|-----|---|
| 345 | 355 | 1 |
| 345 | 380 | 1 |
| 346 | 348 | 1 |
| 346 | 349 | 1 |
| 346 | 351 | 1 |
| 346 | 352 | 1 |
| 346 | 353 | 1 |
| 347 | 351 | 1 |
| 347 | 352 | 1 |
| 347 | 353 | 1 |
| 348 | 350 | 1 |
| 349 | 350 | 1 |
| 350 | 356 | 1 |
| 350 | 357 | 1 |
| 350 | 358 | 1 |
| 350 | 381 | 1 |
| 350 | 382 | 1 |
| 350 | 408 | 1 |
| 351 | 354 | 1 |
| 351 | 355 | 1 |
| 351 | 380 | 1 |
| 352 | 354 | 1 |
| 352 | 355 | 1 |
| 352 | 380 | 1 |
| 353 | 359 | 1 |
| 353 | 360 | 1 |
| 353 | 361 | 1 |
| 353 | 383 | 1 |
| 353 | 384 | 1 |
| 353 | 409 | 1 |
| 353 | 410 | 1 |
| 353 | 413 | 1 |
| 354 | 356 | 1 |
| 354 | 357 | 1 |
| 354 | 358 | 1 |
| 354 | 381 | 1 |
| 354 | 382 | 1 |
| 354 | 408 | 1 |
| 355 | 362 | 1 |
| 355 | 363 | 1 |
| 355 | 364 | 1 |
| 355 | 381 | 1 |
| 355 | 382 | 1 |
| 355 | 408 | 1 |
| 356 | 359 | 1 |
| 356 | 360 | 1 |
| 356 | 361 | 1 |
| 356 | 380 | 1 |
| 357 | 359 | 1 |
| 357 | 360 | 1 |
| 357 | 361 | 1 |
| 357 | 380 | 1 |
| 358 | 365 | 1 |
| 358 | 366 | 1 |

|     |     |   |
|-----|-----|---|
| 358 | 367 | 1 |
| 358 | 380 | 1 |
| 359 | 362 | 1 |
| 359 | 363 | 1 |
| 359 | 364 | 1 |
| 360 | 362 | 1 |
| 360 | 363 | 1 |
| 360 | 364 | 1 |
| 361 | 368 | 1 |
| 361 | 369 | 1 |
| 361 | 370 | 1 |
| 362 | 365 | 1 |
| 362 | 366 | 1 |
| 362 | 367 | 1 |
| 363 | 365 | 1 |
| 363 | 366 | 1 |
| 363 | 367 | 1 |
| 364 | 371 | 1 |
| 364 | 372 | 1 |
| 364 | 373 | 1 |
| 365 | 368 | 1 |
| 365 | 369 | 1 |
| 365 | 370 | 1 |
| 366 | 368 | 1 |
| 366 | 369 | 1 |
| 366 | 370 | 1 |
| 367 | 374 | 1 |
| 367 | 375 | 1 |
| 367 | 376 | 1 |
| 368 | 371 | 1 |
| 368 | 372 | 1 |
| 368 | 373 | 1 |
| 369 | 371 | 1 |
| 369 | 372 | 1 |
| 369 | 373 | 1 |
| 370 | 377 | 1 |
| 370 | 378 | 1 |
| 370 | 379 | 1 |
| 371 | 374 | 1 |
| 371 | 375 | 1 |
| 371 | 376 | 1 |
| 372 | 374 | 1 |
| 372 | 375 | 1 |
| 372 | 376 | 1 |
| 374 | 377 | 1 |
| 374 | 378 | 1 |
| 374 | 379 | 1 |
| 375 | 377 | 1 |
| 375 | 378 | 1 |
| 375 | 379 | 1 |
| 380 | 385 | 1 |
| 380 | 386 | 1 |
| 380 | 411 | 1 |
| 380 | 412 | 1 |

|     |     |   |
|-----|-----|---|
| 380 | 414 | 1 |
| 380 | 415 | 1 |
| 380 | 416 | 1 |
| 381 | 383 | 1 |
| 381 | 384 | 1 |
| 381 | 409 | 1 |
| 381 | 410 | 1 |
| 381 | 413 | 1 |
| 382 | 387 | 1 |
| 382 | 388 | 1 |
| 382 | 389 | 1 |
| 382 | 409 | 1 |
| 382 | 410 | 1 |
| 382 | 413 | 1 |
| 383 | 385 | 1 |
| 383 | 386 | 1 |
| 383 | 408 | 1 |
| 384 | 390 | 1 |
| 384 | 391 | 1 |
| 384 | 392 | 1 |
| 384 | 408 | 1 |
| 385 | 387 | 1 |
| 385 | 388 | 1 |
| 385 | 389 | 1 |
| 386 | 393 | 1 |
| 386 | 394 | 1 |
| 386 | 395 | 1 |
| 387 | 390 | 1 |
| 387 | 391 | 1 |
| 387 | 392 | 1 |
| 388 | 390 | 1 |
| 388 | 391 | 1 |
| 388 | 392 | 1 |
| 389 | 396 | 1 |
| 389 | 400 | 1 |
| 389 | 404 | 1 |
| 390 | 393 | 1 |
| 390 | 394 | 1 |
| 390 | 395 | 1 |
| 391 | 393 | 1 |
| 391 | 394 | 1 |
| 391 | 395 | 1 |
| 392 | 397 | 1 |
| 392 | 398 | 1 |
| 392 | 399 | 1 |
| 392 | 401 | 1 |
| 392 | 402 | 1 |
| 392 | 403 | 1 |
| 392 | 405 | 1 |
| 392 | 406 | 1 |
| 392 | 407 | 1 |
| 393 | 396 | 1 |
| 393 | 400 | 1 |
| 393 | 404 | 1 |

|     |     |   |
|-----|-----|---|
| 394 | 396 | 1 |
| 394 | 400 | 1 |
| 394 | 404 | 1 |
| 396 | 401 | 1 |
| 396 | 402 | 1 |
| 396 | 403 | 1 |
| 396 | 405 | 1 |
| 396 | 406 | 1 |
| 396 | 407 | 1 |
| 397 | 400 | 1 |
| 397 | 404 | 1 |
| 398 | 400 | 1 |
| 398 | 404 | 1 |
| 399 | 400 | 1 |
| 399 | 404 | 1 |
| 400 | 405 | 1 |
| 400 | 406 | 1 |
| 400 | 407 | 1 |
| 401 | 404 | 1 |
| 402 | 404 | 1 |
| 403 | 404 | 1 |
| 408 | 417 | 1 |
| 408 | 418 | 1 |
| 408 | 443 | 1 |
| 409 | 411 | 1 |
| 409 | 412 | 1 |
| 409 | 414 | 1 |
| 409 | 415 | 1 |
| 409 | 416 | 1 |
| 410 | 414 | 1 |
| 410 | 415 | 1 |
| 410 | 416 | 1 |
| 411 | 413 | 1 |
| 412 | 413 | 1 |
| 413 | 419 | 1 |
| 413 | 420 | 1 |
| 413 | 421 | 1 |
| 413 | 444 | 1 |
| 413 | 445 | 1 |
| 413 | 471 | 1 |
| 414 | 417 | 1 |
| 414 | 418 | 1 |
| 414 | 443 | 1 |
| 415 | 417 | 1 |
| 415 | 418 | 1 |
| 415 | 443 | 1 |
| 416 | 422 | 1 |
| 416 | 423 | 1 |
| 416 | 424 | 1 |
| 416 | 446 | 1 |
| 416 | 447 | 1 |
| 416 | 472 | 1 |
| 416 | 473 | 1 |
| 416 | 476 | 1 |

|     |     |   |
|-----|-----|---|
| 417 | 419 | 1 |
| 417 | 420 | 1 |
| 417 | 421 | 1 |
| 417 | 444 | 1 |
| 417 | 445 | 1 |
| 417 | 471 | 1 |
| 418 | 425 | 1 |
| 418 | 426 | 1 |
| 418 | 427 | 1 |
| 418 | 444 | 1 |
| 418 | 445 | 1 |
| 418 | 471 | 1 |
| 419 | 422 | 1 |
| 419 | 423 | 1 |
| 419 | 424 | 1 |
| 419 | 443 | 1 |
| 420 | 422 | 1 |
| 420 | 423 | 1 |
| 420 | 424 | 1 |
| 420 | 443 | 1 |
| 421 | 428 | 1 |
| 421 | 429 | 1 |
| 421 | 430 | 1 |
| 421 | 443 | 1 |
| 422 | 425 | 1 |
| 422 | 426 | 1 |
| 422 | 427 | 1 |
| 423 | 425 | 1 |
| 423 | 426 | 1 |
| 423 | 427 | 1 |
| 424 | 431 | 1 |
| 424 | 432 | 1 |
| 424 | 433 | 1 |
| 425 | 428 | 1 |
| 425 | 429 | 1 |
| 425 | 430 | 1 |
| 426 | 428 | 1 |
| 426 | 429 | 1 |
| 426 | 430 | 1 |
| 427 | 434 | 1 |
| 427 | 435 | 1 |
| 427 | 436 | 1 |
| 428 | 431 | 1 |
| 428 | 432 | 1 |
| 428 | 433 | 1 |
| 429 | 431 | 1 |
| 429 | 432 | 1 |
| 429 | 433 | 1 |
| 430 | 437 | 1 |
| 430 | 438 | 1 |
| 430 | 439 | 1 |
| 431 | 434 | 1 |
| 431 | 435 | 1 |
| 431 | 436 | 1 |

|     |     |   |
|-----|-----|---|
| 432 | 434 | 1 |
| 432 | 435 | 1 |
| 432 | 436 | 1 |
| 433 | 440 | 1 |
| 433 | 441 | 1 |
| 433 | 442 | 1 |
| 434 | 437 | 1 |
| 434 | 438 | 1 |
| 434 | 439 | 1 |
| 435 | 437 | 1 |
| 435 | 438 | 1 |
| 435 | 439 | 1 |
| 437 | 440 | 1 |
| 437 | 441 | 1 |
| 437 | 442 | 1 |
| 438 | 440 | 1 |
| 438 | 441 | 1 |
| 438 | 442 | 1 |
| 443 | 448 | 1 |
| 443 | 449 | 1 |
| 443 | 474 | 1 |
| 443 | 475 | 1 |
| 443 | 477 | 1 |
| 443 | 478 | 1 |
| 443 | 479 | 1 |
| 444 | 446 | 1 |
| 444 | 447 | 1 |
| 444 | 472 | 1 |
| 444 | 473 | 1 |
| 444 | 476 | 1 |
| 445 | 450 | 1 |
| 445 | 451 | 1 |
| 445 | 452 | 1 |
| 445 | 472 | 1 |
| 445 | 473 | 1 |
| 445 | 476 | 1 |
| 446 | 448 | 1 |
| 446 | 449 | 1 |
| 446 | 471 | 1 |
| 447 | 453 | 1 |
| 447 | 454 | 1 |
| 447 | 455 | 1 |
| 447 | 471 | 1 |
| 448 | 450 | 1 |
| 448 | 451 | 1 |
| 448 | 452 | 1 |
| 449 | 456 | 1 |
| 449 | 457 | 1 |
| 449 | 458 | 1 |
| 450 | 453 | 1 |
| 450 | 454 | 1 |
| 450 | 455 | 1 |
| 451 | 453 | 1 |
| 451 | 454 | 1 |



|     |     |   |
|-----|-----|---|
| 451 | 455 | 1 |
| 452 | 459 | 1 |
| 452 | 463 | 1 |
| 452 | 467 | 1 |
| 453 | 456 | 1 |
| 453 | 457 | 1 |
| 453 | 458 | 1 |
| 454 | 456 | 1 |
| 454 | 457 | 1 |
| 454 | 458 | 1 |
| 455 | 460 | 1 |
| 455 | 461 | 1 |
| 455 | 462 | 1 |
| 455 | 464 | 1 |
| 455 | 465 | 1 |
| 455 | 466 | 1 |
| 455 | 468 | 1 |
| 455 | 469 | 1 |
| 455 | 470 | 1 |
| 456 | 459 | 1 |
| 456 | 463 | 1 |
| 456 | 467 | 1 |
| 457 | 459 | 1 |
| 457 | 463 | 1 |
| 457 | 467 | 1 |
| 459 | 464 | 1 |
| 459 | 465 | 1 |
| 459 | 466 | 1 |
| 459 | 468 | 1 |
| 459 | 469 | 1 |
| 459 | 470 | 1 |
| 460 | 463 | 1 |
| 460 | 467 | 1 |
| 461 | 463 | 1 |
| 461 | 467 | 1 |
| 462 | 463 | 1 |
| 462 | 467 | 1 |
| 463 | 468 | 1 |
| 463 | 469 | 1 |
| 463 | 470 | 1 |
| 464 | 467 | 1 |
| 465 | 467 | 1 |
| 466 | 467 | 1 |
| 471 | 480 | 1 |
| 471 | 481 | 1 |
| 471 | 506 | 1 |
| 472 | 474 | 1 |
| 472 | 475 | 1 |
| 472 | 477 | 1 |
| 472 | 478 | 1 |
| 472 | 479 | 1 |
| 473 | 477 | 1 |
| 473 | 478 | 1 |
| 473 | 479 | 1 |

|     |     |   |
|-----|-----|---|
| 474 | 476 | 1 |
| 475 | 476 | 1 |
| 476 | 482 | 1 |
| 476 | 483 | 1 |
| 476 | 484 | 1 |
| 476 | 507 | 1 |
| 476 | 508 | 1 |
| 476 | 534 | 1 |
| 477 | 480 | 1 |
| 477 | 481 | 1 |
| 477 | 506 | 1 |
| 478 | 480 | 1 |
| 478 | 481 | 1 |
| 478 | 506 | 1 |
| 479 | 485 | 1 |
| 479 | 486 | 1 |
| 479 | 487 | 1 |
| 479 | 509 | 1 |
| 479 | 510 | 1 |
| 479 | 535 | 1 |
| 479 | 536 | 1 |
| 479 | 539 | 1 |
| 480 | 482 | 1 |
| 480 | 483 | 1 |
| 480 | 484 | 1 |
| 480 | 507 | 1 |
| 480 | 508 | 1 |
| 480 | 534 | 1 |
| 481 | 488 | 1 |
| 481 | 489 | 1 |
| 481 | 490 | 1 |
| 481 | 507 | 1 |
| 481 | 508 | 1 |
| 481 | 534 | 1 |
| 482 | 485 | 1 |
| 482 | 486 | 1 |
| 482 | 487 | 1 |
| 482 | 506 | 1 |
| 483 | 485 | 1 |
| 483 | 486 | 1 |
| 483 | 487 | 1 |
| 483 | 506 | 1 |
| 484 | 491 | 1 |
| 484 | 492 | 1 |
| 484 | 493 | 1 |
| 484 | 506 | 1 |
| 485 | 488 | 1 |
| 485 | 489 | 1 |
| 485 | 490 | 1 |
| 486 | 488 | 1 |
| 486 | 489 | 1 |
| 486 | 490 | 1 |
| 487 | 494 | 1 |
| 487 | 495 | 1 |

|     |     |   |
|-----|-----|---|
| 487 | 496 | 1 |
| 488 | 491 | 1 |
| 488 | 492 | 1 |
| 488 | 493 | 1 |
| 489 | 491 | 1 |
| 489 | 492 | 1 |
| 489 | 493 | 1 |
| 490 | 497 | 1 |
| 490 | 498 | 1 |
| 490 | 499 | 1 |
| 491 | 494 | 1 |
| 491 | 495 | 1 |
| 491 | 496 | 1 |
| 492 | 494 | 1 |
| 492 | 495 | 1 |
| 492 | 496 | 1 |
| 493 | 500 | 1 |
| 493 | 501 | 1 |
| 493 | 502 | 1 |
| 494 | 497 | 1 |
| 494 | 498 | 1 |
| 494 | 499 | 1 |
| 495 | 497 | 1 |
| 495 | 498 | 1 |
| 495 | 499 | 1 |
| 496 | 503 | 1 |
| 496 | 504 | 1 |
| 496 | 505 | 1 |
| 497 | 500 | 1 |
| 497 | 501 | 1 |
| 497 | 502 | 1 |
| 498 | 500 | 1 |
| 498 | 501 | 1 |
| 498 | 502 | 1 |
| 500 | 503 | 1 |
| 500 | 504 | 1 |
| 500 | 505 | 1 |
| 501 | 503 | 1 |
| 501 | 504 | 1 |
| 501 | 505 | 1 |
| 506 | 511 | 1 |
| 506 | 512 | 1 |
| 506 | 537 | 1 |
| 506 | 538 | 1 |
| 506 | 540 | 1 |
| 506 | 541 | 1 |
| 506 | 542 | 1 |
| 507 | 509 | 1 |
| 507 | 510 | 1 |
| 507 | 535 | 1 |
| 507 | 536 | 1 |
| 507 | 539 | 1 |
| 508 | 513 | 1 |
| 508 | 514 | 1 |

|     |     |   |
|-----|-----|---|
| 508 | 515 | 1 |
| 508 | 535 | 1 |
| 508 | 536 | 1 |
| 508 | 539 | 1 |
| 509 | 511 | 1 |
| 509 | 512 | 1 |
| 509 | 534 | 1 |
| 510 | 516 | 1 |
| 510 | 517 | 1 |
| 510 | 518 | 1 |
| 510 | 534 | 1 |
| 511 | 513 | 1 |
| 511 | 514 | 1 |
| 511 | 515 | 1 |
| 512 | 519 | 1 |
| 512 | 520 | 1 |
| 512 | 521 | 1 |
| 513 | 516 | 1 |
| 513 | 517 | 1 |
| 513 | 518 | 1 |
| 514 | 516 | 1 |
| 514 | 517 | 1 |
| 514 | 518 | 1 |
| 515 | 522 | 1 |
| 515 | 526 | 1 |
| 515 | 530 | 1 |
| 516 | 519 | 1 |
| 516 | 520 | 1 |
| 516 | 521 | 1 |
| 517 | 519 | 1 |
| 517 | 520 | 1 |
| 517 | 521 | 1 |
| 518 | 523 | 1 |
| 518 | 524 | 1 |
| 518 | 525 | 1 |
| 518 | 527 | 1 |
| 518 | 528 | 1 |
| 518 | 529 | 1 |
| 518 | 531 | 1 |
| 518 | 532 | 1 |
| 518 | 533 | 1 |
| 519 | 522 | 1 |
| 519 | 526 | 1 |
| 519 | 530 | 1 |
| 520 | 522 | 1 |
| 520 | 526 | 1 |
| 520 | 530 | 1 |
| 522 | 527 | 1 |
| 522 | 528 | 1 |
| 522 | 529 | 1 |
| 522 | 531 | 1 |
| 522 | 532 | 1 |
| 522 | 533 | 1 |
| 523 | 526 | 1 |

|     |     |   |
|-----|-----|---|
| 523 | 530 | 1 |
| 524 | 526 | 1 |
| 524 | 530 | 1 |
| 525 | 526 | 1 |
| 525 | 530 | 1 |
| 526 | 531 | 1 |
| 526 | 532 | 1 |
| 526 | 533 | 1 |
| 527 | 530 | 1 |
| 528 | 530 | 1 |
| 529 | 530 | 1 |
| 534 | 543 | 1 |
| 534 | 544 | 1 |
| 534 | 569 | 1 |
| 535 | 537 | 1 |
| 535 | 538 | 1 |
| 535 | 540 | 1 |
| 535 | 541 | 1 |
| 535 | 542 | 1 |
| 536 | 540 | 1 |
| 536 | 541 | 1 |
| 536 | 542 | 1 |
| 537 | 539 | 1 |
| 538 | 539 | 1 |
| 539 | 545 | 1 |
| 539 | 546 | 1 |
| 539 | 547 | 1 |
| 539 | 570 | 1 |
| 539 | 571 | 1 |
| 539 | 597 | 1 |
| 540 | 543 | 1 |
| 540 | 544 | 1 |
| 540 | 569 | 1 |
| 541 | 543 | 1 |
| 541 | 544 | 1 |
| 541 | 569 | 1 |
| 542 | 548 | 1 |
| 542 | 549 | 1 |
| 542 | 550 | 1 |
| 542 | 572 | 1 |
| 542 | 573 | 1 |
| 542 | 598 | 1 |
| 542 | 599 | 1 |
| 542 | 602 | 1 |
| 543 | 545 | 1 |
| 543 | 546 | 1 |
| 543 | 547 | 1 |
| 543 | 570 | 1 |
| 543 | 571 | 1 |
| 543 | 597 | 1 |
| 544 | 551 | 1 |
| 544 | 552 | 1 |
| 544 | 553 | 1 |
| 544 | 570 | 1 |

|     |     |   |
|-----|-----|---|
| 544 | 571 | 1 |
| 544 | 597 | 1 |
| 545 | 548 | 1 |
| 545 | 549 | 1 |
| 545 | 550 | 1 |
| 545 | 569 | 1 |
| 546 | 548 | 1 |
| 546 | 549 | 1 |
| 546 | 550 | 1 |
| 546 | 569 | 1 |
| 547 | 554 | 1 |
| 547 | 555 | 1 |
| 547 | 556 | 1 |
| 547 | 569 | 1 |
| 548 | 551 | 1 |
| 548 | 552 | 1 |
| 548 | 553 | 1 |
| 549 | 551 | 1 |
| 549 | 552 | 1 |
| 549 | 553 | 1 |
| 550 | 557 | 1 |
| 550 | 558 | 1 |
| 550 | 559 | 1 |
| 551 | 554 | 1 |
| 551 | 555 | 1 |
| 551 | 556 | 1 |
| 552 | 554 | 1 |
| 552 | 555 | 1 |
| 552 | 556 | 1 |
| 553 | 560 | 1 |
| 553 | 561 | 1 |
| 553 | 562 | 1 |
| 554 | 557 | 1 |
| 554 | 558 | 1 |
| 554 | 559 | 1 |
| 555 | 557 | 1 |
| 555 | 558 | 1 |
| 555 | 559 | 1 |
| 556 | 563 | 1 |
| 556 | 564 | 1 |
| 556 | 565 | 1 |
| 557 | 560 | 1 |
| 557 | 561 | 1 |
| 557 | 562 | 1 |
| 558 | 560 | 1 |
| 558 | 561 | 1 |
| 558 | 562 | 1 |
| 559 | 566 | 1 |
| 559 | 567 | 1 |
| 559 | 568 | 1 |
| 560 | 563 | 1 |
| 560 | 564 | 1 |
| 560 | 565 | 1 |
| 561 | 563 | 1 |

|     |     |   |
|-----|-----|---|
| 561 | 564 | 1 |
| 561 | 565 | 1 |
| 563 | 566 | 1 |
| 563 | 567 | 1 |
| 563 | 568 | 1 |
| 564 | 566 | 1 |
| 564 | 567 | 1 |
| 564 | 568 | 1 |
| 569 | 574 | 1 |
| 569 | 575 | 1 |
| 569 | 600 | 1 |
| 569 | 601 | 1 |
| 569 | 603 | 1 |
| 569 | 604 | 1 |
| 569 | 605 | 1 |
| 570 | 572 | 1 |
| 570 | 573 | 1 |
| 570 | 598 | 1 |
| 570 | 599 | 1 |
| 570 | 602 | 1 |
| 571 | 576 | 1 |
| 571 | 577 | 1 |
| 571 | 578 | 1 |
| 571 | 598 | 1 |
| 571 | 599 | 1 |
| 571 | 602 | 1 |
| 572 | 574 | 1 |
| 572 | 575 | 1 |
| 572 | 597 | 1 |
| 573 | 579 | 1 |
| 573 | 580 | 1 |
| 573 | 581 | 1 |
| 573 | 597 | 1 |
| 574 | 576 | 1 |
| 574 | 577 | 1 |
| 574 | 578 | 1 |
| 575 | 582 | 1 |
| 575 | 583 | 1 |
| 575 | 584 | 1 |
| 576 | 579 | 1 |
| 576 | 580 | 1 |
| 576 | 581 | 1 |
| 577 | 579 | 1 |
| 577 | 580 | 1 |
| 577 | 581 | 1 |
| 578 | 585 | 1 |
| 578 | 589 | 1 |
| 578 | 593 | 1 |
| 579 | 582 | 1 |
| 579 | 583 | 1 |
| 579 | 584 | 1 |
| 580 | 582 | 1 |
| 580 | 583 | 1 |
| 580 | 584 | 1 |

|     |     |   |
|-----|-----|---|
| 581 | 586 | 1 |
| 581 | 587 | 1 |
| 581 | 588 | 1 |
| 581 | 590 | 1 |
| 581 | 591 | 1 |
| 581 | 592 | 1 |
| 581 | 594 | 1 |
| 581 | 595 | 1 |
| 581 | 596 | 1 |
| 582 | 585 | 1 |
| 582 | 589 | 1 |
| 582 | 593 | 1 |
| 583 | 585 | 1 |
| 583 | 589 | 1 |
| 583 | 593 | 1 |
| 585 | 590 | 1 |
| 585 | 591 | 1 |
| 585 | 592 | 1 |
| 585 | 594 | 1 |
| 585 | 595 | 1 |
| 585 | 596 | 1 |
| 586 | 589 | 1 |
| 586 | 593 | 1 |
| 587 | 589 | 1 |
| 587 | 593 | 1 |
| 588 | 589 | 1 |
| 588 | 593 | 1 |
| 589 | 594 | 1 |
| 589 | 595 | 1 |
| 589 | 596 | 1 |
| 590 | 593 | 1 |
| 591 | 593 | 1 |
| 592 | 593 | 1 |
| 597 | 606 | 1 |
| 597 | 607 | 1 |
| 597 | 632 | 1 |
| 598 | 600 | 1 |
| 598 | 601 | 1 |
| 598 | 603 | 1 |
| 598 | 604 | 1 |
| 598 | 605 | 1 |
| 599 | 603 | 1 |
| 599 | 604 | 1 |
| 599 | 605 | 1 |
| 600 | 602 | 1 |
| 601 | 602 | 1 |
| 602 | 608 | 1 |
| 602 | 609 | 1 |
| 602 | 610 | 1 |
| 602 | 633 | 1 |
| 602 | 634 | 1 |
| 602 | 660 | 1 |
| 603 | 606 | 1 |
| 603 | 607 | 1 |



|     |     |   |
|-----|-----|---|
| 603 | 632 | 1 |
| 604 | 606 | 1 |
| 604 | 607 | 1 |
| 604 | 632 | 1 |
| 605 | 611 | 1 |
| 605 | 612 | 1 |
| 605 | 613 | 1 |
| 605 | 635 | 1 |
| 605 | 636 | 1 |
| 605 | 661 | 1 |
| 605 | 662 | 1 |
| 605 | 665 | 1 |
| 606 | 608 | 1 |
| 606 | 609 | 1 |
| 606 | 610 | 1 |
| 606 | 633 | 1 |
| 606 | 634 | 1 |
| 606 | 660 | 1 |
| 607 | 614 | 1 |
| 607 | 615 | 1 |
| 607 | 616 | 1 |
| 607 | 633 | 1 |
| 607 | 634 | 1 |
| 607 | 660 | 1 |
| 608 | 611 | 1 |
| 608 | 612 | 1 |
| 608 | 613 | 1 |
| 608 | 632 | 1 |
| 609 | 611 | 1 |
| 609 | 612 | 1 |
| 609 | 613 | 1 |
| 609 | 632 | 1 |
| 610 | 617 | 1 |
| 610 | 618 | 1 |
| 610 | 619 | 1 |
| 610 | 632 | 1 |
| 611 | 614 | 1 |
| 611 | 615 | 1 |
| 611 | 616 | 1 |
| 612 | 614 | 1 |
| 612 | 615 | 1 |
| 612 | 616 | 1 |
| 613 | 620 | 1 |
| 613 | 621 | 1 |
| 613 | 622 | 1 |
| 614 | 617 | 1 |
| 614 | 618 | 1 |
| 614 | 619 | 1 |
| 615 | 617 | 1 |
| 615 | 618 | 1 |
| 615 | 619 | 1 |
| 616 | 623 | 1 |
| 616 | 624 | 1 |
| 616 | 625 | 1 |

|     |     |   |
|-----|-----|---|
| 617 | 620 | 1 |
| 617 | 621 | 1 |
| 617 | 622 | 1 |
| 618 | 620 | 1 |
| 618 | 621 | 1 |
| 618 | 622 | 1 |
| 619 | 626 | 1 |
| 619 | 627 | 1 |
| 619 | 628 | 1 |
| 620 | 623 | 1 |
| 620 | 624 | 1 |
| 620 | 625 | 1 |
| 621 | 623 | 1 |
| 621 | 624 | 1 |
| 621 | 625 | 1 |
| 622 | 629 | 1 |
| 622 | 630 | 1 |
| 622 | 631 | 1 |
| 623 | 626 | 1 |
| 623 | 627 | 1 |
| 623 | 628 | 1 |
| 624 | 626 | 1 |
| 624 | 627 | 1 |
| 624 | 628 | 1 |
| 626 | 629 | 1 |
| 626 | 630 | 1 |
| 626 | 631 | 1 |
| 627 | 629 | 1 |
| 627 | 630 | 1 |
| 627 | 631 | 1 |
| 632 | 637 | 1 |
| 632 | 638 | 1 |
| 632 | 663 | 1 |
| 632 | 664 | 1 |
| 632 | 666 | 1 |
| 632 | 667 | 1 |
| 632 | 668 | 1 |
| 633 | 635 | 1 |
| 633 | 636 | 1 |
| 633 | 661 | 1 |
| 633 | 662 | 1 |
| 633 | 665 | 1 |
| 634 | 639 | 1 |
| 634 | 640 | 1 |
| 634 | 641 | 1 |
| 634 | 661 | 1 |
| 634 | 662 | 1 |
| 634 | 665 | 1 |
| 635 | 637 | 1 |
| 635 | 638 | 1 |
| 635 | 660 | 1 |
| 636 | 642 | 1 |
| 636 | 643 | 1 |
| 636 | 644 | 1 |

|     |     |   |
|-----|-----|---|
| 636 | 660 | 1 |
| 637 | 639 | 1 |
| 637 | 640 | 1 |
| 637 | 641 | 1 |
| 638 | 645 | 1 |
| 638 | 646 | 1 |
| 638 | 647 | 1 |
| 639 | 642 | 1 |
| 639 | 643 | 1 |
| 639 | 644 | 1 |
| 640 | 642 | 1 |
| 640 | 643 | 1 |
| 640 | 644 | 1 |
| 641 | 648 | 1 |
| 641 | 652 | 1 |
| 641 | 656 | 1 |
| 642 | 645 | 1 |
| 642 | 646 | 1 |
| 642 | 647 | 1 |
| 643 | 645 | 1 |
| 643 | 646 | 1 |
| 643 | 647 | 1 |
| 644 | 649 | 1 |
| 644 | 650 | 1 |
| 644 | 651 | 1 |
| 644 | 653 | 1 |
| 644 | 654 | 1 |
| 644 | 655 | 1 |
| 644 | 657 | 1 |
| 644 | 658 | 1 |
| 644 | 659 | 1 |
| 645 | 648 | 1 |
| 645 | 652 | 1 |
| 645 | 656 | 1 |
| 646 | 648 | 1 |
| 646 | 652 | 1 |
| 646 | 656 | 1 |
| 648 | 653 | 1 |
| 648 | 654 | 1 |
| 648 | 655 | 1 |
| 648 | 657 | 1 |
| 648 | 658 | 1 |
| 648 | 659 | 1 |
| 649 | 652 | 1 |
| 649 | 656 | 1 |
| 650 | 652 | 1 |
| 650 | 656 | 1 |
| 651 | 652 | 1 |
| 651 | 656 | 1 |
| 652 | 657 | 1 |
| 652 | 658 | 1 |
| 652 | 659 | 1 |
| 653 | 656 | 1 |
| 654 | 656 | 1 |

|     |     |   |
|-----|-----|---|
| 655 | 656 | 1 |
| 660 | 669 | 1 |
| 660 | 670 | 1 |
| 660 | 695 | 1 |
| 661 | 663 | 1 |
| 661 | 664 | 1 |
| 661 | 666 | 1 |
| 661 | 667 | 1 |
| 661 | 668 | 1 |
| 662 | 666 | 1 |
| 662 | 667 | 1 |
| 662 | 668 | 1 |
| 663 | 665 | 1 |
| 664 | 665 | 1 |
| 665 | 671 | 1 |
| 665 | 672 | 1 |
| 665 | 673 | 1 |
| 665 | 696 | 1 |
| 665 | 697 | 1 |
| 665 | 723 | 1 |
| 666 | 669 | 1 |
| 666 | 670 | 1 |
| 666 | 695 | 1 |
| 667 | 669 | 1 |
| 667 | 670 | 1 |
| 667 | 695 | 1 |
| 668 | 674 | 1 |
| 668 | 675 | 1 |
| 668 | 676 | 1 |
| 668 | 698 | 1 |
| 668 | 699 | 1 |
| 668 | 724 | 1 |
| 668 | 725 | 1 |
| 668 | 728 | 1 |
| 669 | 671 | 1 |
| 669 | 672 | 1 |
| 669 | 673 | 1 |
| 669 | 696 | 1 |
| 669 | 697 | 1 |
| 669 | 723 | 1 |
| 670 | 677 | 1 |
| 670 | 678 | 1 |
| 670 | 679 | 1 |
| 670 | 696 | 1 |
| 670 | 697 | 1 |
| 670 | 723 | 1 |
| 671 | 674 | 1 |
| 671 | 675 | 1 |
| 671 | 676 | 1 |
| 671 | 695 | 1 |
| 672 | 674 | 1 |
| 672 | 675 | 1 |
| 672 | 676 | 1 |
| 672 | 695 | 1 |

|     |     |   |
|-----|-----|---|
| 673 | 680 | 1 |
| 673 | 681 | 1 |
| 673 | 682 | 1 |
| 673 | 695 | 1 |
| 674 | 677 | 1 |
| 674 | 678 | 1 |
| 674 | 679 | 1 |
| 675 | 677 | 1 |
| 675 | 678 | 1 |
| 675 | 679 | 1 |
| 676 | 683 | 1 |
| 676 | 684 | 1 |
| 676 | 685 | 1 |
| 677 | 680 | 1 |
| 677 | 681 | 1 |
| 677 | 682 | 1 |
| 678 | 680 | 1 |
| 678 | 681 | 1 |
| 678 | 682 | 1 |
| 679 | 686 | 1 |
| 679 | 687 | 1 |
| 679 | 688 | 1 |
| 680 | 683 | 1 |
| 680 | 684 | 1 |
| 680 | 685 | 1 |
| 681 | 683 | 1 |
| 681 | 684 | 1 |
| 681 | 685 | 1 |
| 682 | 689 | 1 |
| 682 | 690 | 1 |
| 682 | 691 | 1 |
| 683 | 686 | 1 |
| 683 | 687 | 1 |
| 683 | 688 | 1 |
| 684 | 686 | 1 |
| 684 | 687 | 1 |
| 684 | 688 | 1 |
| 685 | 692 | 1 |
| 685 | 693 | 1 |
| 685 | 694 | 1 |
| 686 | 689 | 1 |
| 686 | 690 | 1 |
| 686 | 691 | 1 |
| 687 | 689 | 1 |
| 687 | 690 | 1 |
| 687 | 691 | 1 |
| 689 | 692 | 1 |
| 689 | 693 | 1 |
| 689 | 694 | 1 |
| 690 | 692 | 1 |
| 690 | 693 | 1 |
| 690 | 694 | 1 |
| 695 | 700 | 1 |
| 695 | 701 | 1 |

|     |     |   |
|-----|-----|---|
| 695 | 726 | 1 |
| 695 | 727 | 1 |
| 695 | 729 | 1 |
| 695 | 730 | 1 |
| 695 | 731 | 1 |
| 696 | 698 | 1 |
| 696 | 699 | 1 |
| 696 | 724 | 1 |
| 696 | 725 | 1 |
| 696 | 728 | 1 |
| 697 | 702 | 1 |
| 697 | 703 | 1 |
| 697 | 704 | 1 |
| 697 | 724 | 1 |
| 697 | 725 | 1 |
| 697 | 728 | 1 |
| 698 | 700 | 1 |
| 698 | 701 | 1 |
| 698 | 723 | 1 |
| 699 | 705 | 1 |
| 699 | 706 | 1 |
| 699 | 707 | 1 |
| 699 | 723 | 1 |
| 700 | 702 | 1 |
| 700 | 703 | 1 |
| 700 | 704 | 1 |
| 701 | 708 | 1 |
| 701 | 709 | 1 |
| 701 | 710 | 1 |
| 702 | 705 | 1 |
| 702 | 706 | 1 |
| 702 | 707 | 1 |
| 703 | 705 | 1 |
| 703 | 706 | 1 |
| 703 | 707 | 1 |
| 704 | 711 | 1 |
| 704 | 715 | 1 |
| 704 | 719 | 1 |
| 705 | 708 | 1 |
| 705 | 709 | 1 |
| 705 | 710 | 1 |
| 706 | 708 | 1 |
| 706 | 709 | 1 |
| 706 | 710 | 1 |
| 707 | 712 | 1 |
| 707 | 713 | 1 |
| 707 | 714 | 1 |
| 707 | 716 | 1 |
| 707 | 717 | 1 |
| 707 | 718 | 1 |
| 707 | 720 | 1 |
| 707 | 721 | 1 |
| 707 | 722 | 1 |
| 708 | 711 | 1 |

|     |     |   |
|-----|-----|---|
| 708 | 715 | 1 |
| 708 | 719 | 1 |
| 709 | 711 | 1 |
| 709 | 715 | 1 |
| 709 | 719 | 1 |
| 711 | 716 | 1 |
| 711 | 717 | 1 |
| 711 | 718 | 1 |
| 711 | 720 | 1 |
| 711 | 721 | 1 |
| 711 | 722 | 1 |
| 712 | 715 | 1 |
| 712 | 719 | 1 |
| 713 | 715 | 1 |
| 713 | 719 | 1 |
| 714 | 715 | 1 |
| 714 | 719 | 1 |
| 715 | 720 | 1 |
| 715 | 721 | 1 |
| 715 | 722 | 1 |
| 716 | 719 | 1 |
| 717 | 719 | 1 |
| 718 | 719 | 1 |
| 723 | 732 | 1 |
| 723 | 733 | 1 |
| 723 | 758 | 1 |
| 724 | 726 | 1 |
| 724 | 727 | 1 |
| 724 | 729 | 1 |
| 724 | 730 | 1 |
| 724 | 731 | 1 |
| 725 | 729 | 1 |
| 725 | 730 | 1 |
| 725 | 731 | 1 |
| 726 | 728 | 1 |
| 727 | 728 | 1 |
| 728 | 734 | 1 |
| 728 | 735 | 1 |
| 728 | 736 | 1 |
| 728 | 759 | 1 |
| 728 | 760 | 1 |
| 728 | 786 | 1 |
| 729 | 732 | 1 |
| 729 | 733 | 1 |
| 729 | 758 | 1 |
| 730 | 732 | 1 |
| 730 | 733 | 1 |
| 730 | 758 | 1 |
| 731 | 737 | 1 |
| 731 | 738 | 1 |
| 731 | 739 | 1 |
| 731 | 761 | 1 |
| 731 | 762 | 1 |
| 731 | 787 | 1 |

|     |     |   |
|-----|-----|---|
| 731 | 788 | 1 |
| 731 | 791 | 1 |
| 732 | 734 | 1 |
| 732 | 735 | 1 |
| 732 | 736 | 1 |
| 732 | 759 | 1 |
| 732 | 760 | 1 |
| 732 | 786 | 1 |
| 733 | 740 | 1 |
| 733 | 741 | 1 |
| 733 | 742 | 1 |
| 733 | 759 | 1 |
| 733 | 760 | 1 |
| 733 | 786 | 1 |
| 734 | 737 | 1 |
| 734 | 738 | 1 |
| 734 | 739 | 1 |
| 734 | 758 | 1 |
| 735 | 737 | 1 |
| 735 | 738 | 1 |
| 735 | 739 | 1 |
| 735 | 758 | 1 |
| 736 | 743 | 1 |
| 736 | 744 | 1 |
| 736 | 745 | 1 |
| 736 | 758 | 1 |
| 737 | 740 | 1 |
| 737 | 741 | 1 |
| 737 | 742 | 1 |
| 738 | 740 | 1 |
| 738 | 741 | 1 |
| 738 | 742 | 1 |
| 739 | 746 | 1 |
| 739 | 747 | 1 |
| 739 | 748 | 1 |
| 740 | 743 | 1 |
| 740 | 744 | 1 |
| 740 | 745 | 1 |
| 741 | 743 | 1 |
| 741 | 744 | 1 |
| 741 | 745 | 1 |
| 742 | 749 | 1 |
| 742 | 750 | 1 |
| 742 | 751 | 1 |
| 743 | 746 | 1 |
| 743 | 747 | 1 |
| 743 | 748 | 1 |
| 744 | 746 | 1 |
| 744 | 747 | 1 |
| 744 | 748 | 1 |
| 745 | 752 | 1 |
| 745 | 753 | 1 |
| 745 | 754 | 1 |
| 746 | 749 | 1 |



|     |     |   |
|-----|-----|---|
| 746 | 750 | 1 |
| 746 | 751 | 1 |
| 747 | 749 | 1 |
| 747 | 750 | 1 |
| 747 | 751 | 1 |
| 748 | 755 | 1 |
| 748 | 756 | 1 |
| 748 | 757 | 1 |
| 749 | 752 | 1 |
| 749 | 753 | 1 |
| 749 | 754 | 1 |
| 750 | 752 | 1 |
| 750 | 753 | 1 |
| 750 | 754 | 1 |
| 752 | 755 | 1 |
| 752 | 756 | 1 |
| 752 | 757 | 1 |
| 753 | 755 | 1 |
| 753 | 756 | 1 |
| 753 | 757 | 1 |
| 758 | 763 | 1 |
| 758 | 764 | 1 |
| 758 | 789 | 1 |
| 758 | 790 | 1 |
| 758 | 792 | 1 |
| 758 | 793 | 1 |
| 758 | 794 | 1 |
| 759 | 761 | 1 |
| 759 | 762 | 1 |
| 759 | 787 | 1 |
| 759 | 788 | 1 |
| 759 | 791 | 1 |
| 760 | 765 | 1 |
| 760 | 766 | 1 |
| 760 | 767 | 1 |
| 760 | 787 | 1 |
| 760 | 788 | 1 |
| 760 | 791 | 1 |
| 761 | 763 | 1 |
| 761 | 764 | 1 |
| 761 | 786 | 1 |
| 762 | 768 | 1 |
| 762 | 769 | 1 |
| 762 | 770 | 1 |
| 762 | 786 | 1 |
| 763 | 765 | 1 |
| 763 | 766 | 1 |
| 763 | 767 | 1 |
| 764 | 771 | 1 |
| 764 | 772 | 1 |
| 764 | 773 | 1 |
| 765 | 768 | 1 |
| 765 | 769 | 1 |
| 765 | 770 | 1 |

|     |     |   |
|-----|-----|---|
| 766 | 768 | 1 |
| 766 | 769 | 1 |
| 766 | 770 | 1 |
| 767 | 774 | 1 |
| 767 | 778 | 1 |
| 767 | 782 | 1 |
| 768 | 771 | 1 |
| 768 | 772 | 1 |
| 768 | 773 | 1 |
| 769 | 771 | 1 |
| 769 | 772 | 1 |
| 769 | 773 | 1 |
| 770 | 775 | 1 |
| 770 | 776 | 1 |
| 770 | 777 | 1 |
| 770 | 779 | 1 |
| 770 | 780 | 1 |
| 770 | 781 | 1 |
| 770 | 783 | 1 |
| 770 | 784 | 1 |
| 770 | 785 | 1 |
| 771 | 774 | 1 |
| 771 | 778 | 1 |
| 771 | 782 | 1 |
| 772 | 774 | 1 |
| 772 | 778 | 1 |
| 772 | 782 | 1 |
| 774 | 779 | 1 |
| 774 | 780 | 1 |
| 774 | 781 | 1 |
| 774 | 783 | 1 |
| 774 | 784 | 1 |
| 774 | 785 | 1 |
| 775 | 778 | 1 |
| 775 | 782 | 1 |
| 776 | 778 | 1 |
| 776 | 782 | 1 |
| 777 | 778 | 1 |
| 777 | 782 | 1 |
| 778 | 783 | 1 |
| 778 | 784 | 1 |
| 778 | 785 | 1 |
| 779 | 782 | 1 |
| 780 | 782 | 1 |
| 781 | 782 | 1 |
| 786 | 795 | 1 |
| 786 | 796 | 1 |
| 786 | 821 | 1 |
| 787 | 789 | 1 |
| 787 | 790 | 1 |
| 787 | 792 | 1 |
| 787 | 793 | 1 |
| 787 | 794 | 1 |
| 788 | 792 | 1 |

|     |     |   |
|-----|-----|---|
| 788 | 793 | 1 |
| 788 | 794 | 1 |
| 789 | 791 | 1 |
| 790 | 791 | 1 |
| 791 | 797 | 1 |
| 791 | 798 | 1 |
| 791 | 799 | 1 |
| 791 | 822 | 1 |
| 791 | 823 | 1 |
| 791 | 849 | 1 |
| 792 | 795 | 1 |
| 792 | 796 | 1 |
| 792 | 821 | 1 |
| 793 | 795 | 1 |
| 793 | 796 | 1 |
| 793 | 821 | 1 |
| 794 | 800 | 1 |
| 794 | 801 | 1 |
| 794 | 802 | 1 |
| 794 | 824 | 1 |
| 794 | 825 | 1 |
| 794 | 850 | 1 |
| 794 | 851 | 1 |
| 794 | 854 | 1 |
| 795 | 797 | 1 |
| 795 | 798 | 1 |
| 795 | 799 | 1 |
| 795 | 822 | 1 |
| 795 | 823 | 1 |
| 795 | 849 | 1 |
| 796 | 803 | 1 |
| 796 | 804 | 1 |
| 796 | 805 | 1 |
| 796 | 822 | 1 |
| 796 | 823 | 1 |
| 796 | 849 | 1 |
| 797 | 800 | 1 |
| 797 | 801 | 1 |
| 797 | 802 | 1 |
| 797 | 821 | 1 |
| 798 | 800 | 1 |
| 798 | 801 | 1 |
| 798 | 802 | 1 |
| 798 | 821 | 1 |
| 799 | 806 | 1 |
| 799 | 807 | 1 |
| 799 | 808 | 1 |
| 799 | 821 | 1 |
| 800 | 803 | 1 |
| 800 | 804 | 1 |
| 800 | 805 | 1 |
| 801 | 803 | 1 |
| 801 | 804 | 1 |
| 801 | 805 | 1 |

|     |     |   |
|-----|-----|---|
| 802 | 809 | 1 |
| 802 | 810 | 1 |
| 802 | 811 | 1 |
| 803 | 806 | 1 |
| 803 | 807 | 1 |
| 803 | 808 | 1 |
| 804 | 806 | 1 |
| 804 | 807 | 1 |
| 804 | 808 | 1 |
| 805 | 812 | 1 |
| 805 | 813 | 1 |
| 805 | 814 | 1 |
| 806 | 809 | 1 |
| 806 | 810 | 1 |
| 806 | 811 | 1 |
| 807 | 809 | 1 |
| 807 | 810 | 1 |
| 807 | 811 | 1 |
| 808 | 815 | 1 |
| 808 | 816 | 1 |
| 808 | 817 | 1 |
| 809 | 812 | 1 |
| 809 | 813 | 1 |
| 809 | 814 | 1 |
| 810 | 812 | 1 |
| 810 | 813 | 1 |
| 810 | 814 | 1 |
| 811 | 818 | 1 |
| 811 | 819 | 1 |
| 811 | 820 | 1 |
| 812 | 815 | 1 |
| 812 | 816 | 1 |
| 812 | 817 | 1 |
| 813 | 815 | 1 |
| 813 | 816 | 1 |
| 813 | 817 | 1 |
| 815 | 818 | 1 |
| 815 | 819 | 1 |
| 815 | 820 | 1 |
| 816 | 818 | 1 |
| 816 | 819 | 1 |
| 816 | 820 | 1 |
| 821 | 826 | 1 |
| 821 | 827 | 1 |
| 821 | 852 | 1 |
| 821 | 853 | 1 |
| 821 | 855 | 1 |
| 821 | 856 | 1 |
| 821 | 857 | 1 |
| 822 | 824 | 1 |
| 822 | 825 | 1 |
| 822 | 850 | 1 |
| 822 | 851 | 1 |
| 822 | 854 | 1 |

|     |     |   |
|-----|-----|---|
| 823 | 828 | 1 |
| 823 | 829 | 1 |
| 823 | 830 | 1 |
| 823 | 850 | 1 |
| 823 | 851 | 1 |
| 823 | 854 | 1 |
| 824 | 826 | 1 |
| 824 | 827 | 1 |
| 824 | 849 | 1 |
| 825 | 831 | 1 |
| 825 | 832 | 1 |
| 825 | 833 | 1 |
| 825 | 849 | 1 |
| 826 | 828 | 1 |
| 826 | 829 | 1 |
| 826 | 830 | 1 |
| 827 | 834 | 1 |
| 827 | 835 | 1 |
| 827 | 836 | 1 |
| 828 | 831 | 1 |
| 828 | 832 | 1 |
| 828 | 833 | 1 |
| 829 | 831 | 1 |
| 829 | 832 | 1 |
| 829 | 833 | 1 |
| 830 | 837 | 1 |
| 830 | 841 | 1 |
| 830 | 845 | 1 |
| 831 | 834 | 1 |
| 831 | 835 | 1 |
| 831 | 836 | 1 |
| 832 | 834 | 1 |
| 832 | 835 | 1 |
| 832 | 836 | 1 |
| 833 | 838 | 1 |
| 833 | 839 | 1 |
| 833 | 840 | 1 |
| 833 | 842 | 1 |
| 833 | 843 | 1 |
| 833 | 844 | 1 |
| 833 | 846 | 1 |
| 833 | 847 | 1 |
| 833 | 848 | 1 |
| 834 | 837 | 1 |
| 834 | 841 | 1 |
| 834 | 845 | 1 |
| 835 | 837 | 1 |
| 835 | 841 | 1 |
| 835 | 845 | 1 |
| 837 | 842 | 1 |
| 837 | 843 | 1 |
| 837 | 844 | 1 |
| 837 | 846 | 1 |
| 837 | 847 | 1 |

|     |     |   |
|-----|-----|---|
| 837 | 848 | 1 |
| 838 | 841 | 1 |
| 838 | 845 | 1 |
| 839 | 841 | 1 |
| 839 | 845 | 1 |
| 840 | 841 | 1 |
| 840 | 845 | 1 |
| 841 | 846 | 1 |
| 841 | 847 | 1 |
| 841 | 848 | 1 |
| 842 | 845 | 1 |
| 843 | 845 | 1 |
| 844 | 845 | 1 |
| 849 | 858 | 1 |
| 849 | 859 | 1 |
| 849 | 884 | 1 |
| 850 | 852 | 1 |
| 850 | 853 | 1 |
| 850 | 855 | 1 |
| 850 | 856 | 1 |
| 850 | 857 | 1 |
| 851 | 855 | 1 |
| 851 | 856 | 1 |
| 851 | 857 | 1 |
| 852 | 854 | 1 |
| 853 | 854 | 1 |
| 854 | 860 | 1 |
| 854 | 861 | 1 |
| 854 | 862 | 1 |
| 854 | 885 | 1 |
| 854 | 886 | 1 |
| 854 | 912 | 1 |
| 855 | 858 | 1 |
| 855 | 859 | 1 |
| 855 | 884 | 1 |
| 856 | 858 | 1 |
| 856 | 859 | 1 |
| 856 | 884 | 1 |
| 857 | 863 | 1 |
| 857 | 864 | 1 |
| 857 | 865 | 1 |
| 857 | 887 | 1 |
| 857 | 888 | 1 |
| 857 | 913 | 1 |
| 857 | 914 | 1 |
| 857 | 917 | 1 |
| 858 | 860 | 1 |
| 858 | 861 | 1 |
| 858 | 862 | 1 |
| 858 | 885 | 1 |
| 858 | 886 | 1 |
| 858 | 912 | 1 |
| 859 | 866 | 1 |
| 859 | 867 | 1 |

|     |     |   |
|-----|-----|---|
| 859 | 868 | 1 |
| 859 | 885 | 1 |
| 859 | 886 | 1 |
| 859 | 912 | 1 |
| 860 | 863 | 1 |
| 860 | 864 | 1 |
| 860 | 865 | 1 |
| 860 | 884 | 1 |
| 861 | 863 | 1 |
| 861 | 864 | 1 |
| 861 | 865 | 1 |
| 861 | 884 | 1 |
| 862 | 869 | 1 |
| 862 | 870 | 1 |
| 862 | 871 | 1 |
| 862 | 884 | 1 |
| 863 | 866 | 1 |
| 863 | 867 | 1 |
| 863 | 868 | 1 |
| 864 | 866 | 1 |
| 864 | 867 | 1 |
| 864 | 868 | 1 |
| 865 | 872 | 1 |
| 865 | 873 | 1 |
| 865 | 874 | 1 |
| 866 | 869 | 1 |
| 866 | 870 | 1 |
| 866 | 871 | 1 |
| 867 | 869 | 1 |
| 867 | 870 | 1 |
| 867 | 871 | 1 |
| 868 | 875 | 1 |
| 868 | 876 | 1 |
| 868 | 877 | 1 |
| 869 | 872 | 1 |
| 869 | 873 | 1 |
| 869 | 874 | 1 |
| 870 | 872 | 1 |
| 870 | 873 | 1 |
| 870 | 874 | 1 |
| 871 | 878 | 1 |
| 871 | 879 | 1 |
| 871 | 880 | 1 |
| 872 | 875 | 1 |
| 872 | 876 | 1 |
| 872 | 877 | 1 |
| 873 | 875 | 1 |
| 873 | 876 | 1 |
| 873 | 877 | 1 |
| 874 | 881 | 1 |
| 874 | 882 | 1 |
| 874 | 883 | 1 |
| 875 | 878 | 1 |
| 875 | 879 | 1 |

|     |     |   |
|-----|-----|---|
| 875 | 880 | 1 |
| 876 | 878 | 1 |
| 876 | 879 | 1 |
| 876 | 880 | 1 |
| 878 | 881 | 1 |
| 878 | 882 | 1 |
| 878 | 883 | 1 |
| 879 | 881 | 1 |
| 879 | 882 | 1 |
| 879 | 883 | 1 |
| 884 | 889 | 1 |
| 884 | 890 | 1 |
| 884 | 915 | 1 |
| 884 | 916 | 1 |
| 884 | 918 | 1 |
| 884 | 919 | 1 |
| 884 | 920 | 1 |
| 885 | 887 | 1 |
| 885 | 888 | 1 |
| 885 | 913 | 1 |
| 885 | 914 | 1 |
| 885 | 917 | 1 |
| 886 | 891 | 1 |
| 886 | 892 | 1 |
| 886 | 893 | 1 |
| 886 | 913 | 1 |
| 886 | 914 | 1 |
| 886 | 917 | 1 |
| 887 | 889 | 1 |
| 887 | 890 | 1 |
| 887 | 912 | 1 |
| 888 | 894 | 1 |
| 888 | 895 | 1 |
| 888 | 896 | 1 |
| 888 | 912 | 1 |
| 889 | 891 | 1 |
| 889 | 892 | 1 |
| 889 | 893 | 1 |
| 890 | 897 | 1 |
| 890 | 898 | 1 |
| 890 | 899 | 1 |
| 891 | 894 | 1 |
| 891 | 895 | 1 |
| 891 | 896 | 1 |
| 892 | 894 | 1 |
| 892 | 895 | 1 |
| 892 | 896 | 1 |
| 893 | 900 | 1 |
| 893 | 904 | 1 |
| 893 | 908 | 1 |
| 894 | 897 | 1 |
| 894 | 898 | 1 |
| 894 | 899 | 1 |
| 895 | 897 | 1 |



|     |     |   |
|-----|-----|---|
| 895 | 898 | 1 |
| 895 | 899 | 1 |
| 896 | 901 | 1 |
| 896 | 902 | 1 |
| 896 | 903 | 1 |
| 896 | 905 | 1 |
| 896 | 906 | 1 |
| 896 | 907 | 1 |
| 896 | 909 | 1 |
| 896 | 910 | 1 |
| 896 | 911 | 1 |
| 897 | 900 | 1 |
| 897 | 904 | 1 |
| 897 | 908 | 1 |
| 898 | 900 | 1 |
| 898 | 904 | 1 |
| 898 | 908 | 1 |
| 900 | 905 | 1 |
| 900 | 906 | 1 |
| 900 | 907 | 1 |
| 900 | 909 | 1 |
| 900 | 910 | 1 |
| 900 | 911 | 1 |
| 901 | 904 | 1 |
| 901 | 908 | 1 |
| 902 | 904 | 1 |
| 902 | 908 | 1 |
| 903 | 904 | 1 |
| 903 | 908 | 1 |
| 904 | 909 | 1 |
| 904 | 910 | 1 |
| 904 | 911 | 1 |
| 905 | 908 | 1 |
| 906 | 908 | 1 |
| 907 | 908 | 1 |
| 912 | 921 | 1 |
| 912 | 922 | 1 |
| 912 | 947 | 1 |
| 913 | 915 | 1 |
| 913 | 916 | 1 |
| 913 | 918 | 1 |
| 913 | 919 | 1 |
| 913 | 920 | 1 |
| 914 | 918 | 1 |
| 914 | 919 | 1 |
| 914 | 920 | 1 |
| 915 | 917 | 1 |
| 916 | 917 | 1 |
| 917 | 923 | 1 |
| 917 | 924 | 1 |
| 917 | 925 | 1 |
| 917 | 948 | 1 |
| 917 | 949 | 1 |
| 917 | 975 | 1 |

|     |     |   |
|-----|-----|---|
| 918 | 921 | 1 |
| 918 | 922 | 1 |
| 918 | 947 | 1 |
| 919 | 921 | 1 |
| 919 | 922 | 1 |
| 919 | 947 | 1 |
| 920 | 926 | 1 |
| 920 | 927 | 1 |
| 920 | 928 | 1 |
| 920 | 950 | 1 |
| 920 | 951 | 1 |
| 920 | 976 | 1 |
| 920 | 977 | 1 |
| 920 | 980 | 1 |
| 921 | 923 | 1 |
| 921 | 924 | 1 |
| 921 | 925 | 1 |
| 921 | 948 | 1 |
| 921 | 949 | 1 |
| 921 | 975 | 1 |
| 922 | 929 | 1 |
| 922 | 930 | 1 |
| 922 | 931 | 1 |
| 922 | 948 | 1 |
| 922 | 949 | 1 |
| 922 | 975 | 1 |
| 923 | 926 | 1 |
| 923 | 927 | 1 |
| 923 | 928 | 1 |
| 923 | 947 | 1 |
| 924 | 926 | 1 |
| 924 | 927 | 1 |
| 924 | 928 | 1 |
| 924 | 947 | 1 |
| 925 | 932 | 1 |
| 925 | 933 | 1 |
| 925 | 934 | 1 |
| 925 | 947 | 1 |
| 926 | 929 | 1 |
| 926 | 930 | 1 |
| 926 | 931 | 1 |
| 927 | 929 | 1 |
| 927 | 930 | 1 |
| 927 | 931 | 1 |
| 928 | 935 | 1 |
| 928 | 936 | 1 |
| 928 | 937 | 1 |
| 929 | 932 | 1 |
| 929 | 933 | 1 |
| 929 | 934 | 1 |
| 930 | 932 | 1 |
| 930 | 933 | 1 |
| 930 | 934 | 1 |
| 931 | 938 | 1 |

|     |     |   |
|-----|-----|---|
| 931 | 939 | 1 |
| 931 | 940 | 1 |
| 932 | 935 | 1 |
| 932 | 936 | 1 |
| 932 | 937 | 1 |
| 933 | 935 | 1 |
| 933 | 936 | 1 |
| 933 | 937 | 1 |
| 934 | 941 | 1 |
| 934 | 942 | 1 |
| 934 | 943 | 1 |
| 935 | 938 | 1 |
| 935 | 939 | 1 |
| 935 | 940 | 1 |
| 936 | 938 | 1 |
| 936 | 939 | 1 |
| 936 | 940 | 1 |
| 937 | 944 | 1 |
| 937 | 945 | 1 |
| 937 | 946 | 1 |
| 938 | 941 | 1 |
| 938 | 942 | 1 |
| 938 | 943 | 1 |
| 939 | 941 | 1 |
| 939 | 942 | 1 |
| 939 | 943 | 1 |
| 941 | 944 | 1 |
| 941 | 945 | 1 |
| 941 | 946 | 1 |
| 942 | 944 | 1 |
| 942 | 945 | 1 |
| 942 | 946 | 1 |
| 947 | 952 | 1 |
| 947 | 953 | 1 |
| 947 | 978 | 1 |
| 947 | 979 | 1 |
| 947 | 981 | 1 |
| 947 | 982 | 1 |
| 947 | 983 | 1 |
| 948 | 950 | 1 |
| 948 | 951 | 1 |
| 948 | 976 | 1 |
| 948 | 977 | 1 |
| 948 | 980 | 1 |
| 949 | 954 | 1 |
| 949 | 955 | 1 |
| 949 | 956 | 1 |
| 949 | 976 | 1 |
| 949 | 977 | 1 |
| 949 | 980 | 1 |
| 950 | 952 | 1 |
| 950 | 953 | 1 |
| 950 | 975 | 1 |
| 951 | 957 | 1 |

|     |     |   |
|-----|-----|---|
| 951 | 958 | 1 |
| 951 | 959 | 1 |
| 951 | 975 | 1 |
| 952 | 954 | 1 |
| 952 | 955 | 1 |
| 952 | 956 | 1 |
| 953 | 960 | 1 |
| 953 | 961 | 1 |
| 953 | 962 | 1 |
| 954 | 957 | 1 |
| 954 | 958 | 1 |
| 954 | 959 | 1 |
| 955 | 957 | 1 |
| 955 | 958 | 1 |
| 955 | 959 | 1 |
| 956 | 963 | 1 |
| 956 | 967 | 1 |
| 956 | 971 | 1 |
| 957 | 960 | 1 |
| 957 | 961 | 1 |
| 957 | 962 | 1 |
| 958 | 960 | 1 |
| 958 | 961 | 1 |
| 958 | 962 | 1 |
| 959 | 964 | 1 |
| 959 | 965 | 1 |
| 959 | 966 | 1 |
| 959 | 968 | 1 |
| 959 | 969 | 1 |
| 959 | 970 | 1 |
| 959 | 972 | 1 |
| 959 | 973 | 1 |
| 959 | 974 | 1 |
| 960 | 963 | 1 |
| 960 | 967 | 1 |
| 960 | 971 | 1 |
| 961 | 963 | 1 |
| 961 | 967 | 1 |
| 961 | 971 | 1 |
| 963 | 968 | 1 |
| 963 | 969 | 1 |
| 963 | 970 | 1 |
| 963 | 972 | 1 |
| 963 | 973 | 1 |
| 963 | 974 | 1 |
| 964 | 967 | 1 |
| 964 | 971 | 1 |
| 965 | 967 | 1 |
| 965 | 971 | 1 |
| 966 | 967 | 1 |
| 966 | 971 | 1 |
| 967 | 972 | 1 |
| 967 | 973 | 1 |
| 967 | 974 | 1 |

|     |      |   |
|-----|------|---|
| 968 | 971  | 1 |
| 969 | 971  | 1 |
| 970 | 971  | 1 |
| 975 | 984  | 1 |
| 975 | 985  | 1 |
| 975 | 1010 | 1 |
| 976 | 978  | 1 |
| 976 | 979  | 1 |
| 976 | 981  | 1 |
| 976 | 982  | 1 |
| 976 | 983  | 1 |
| 977 | 981  | 1 |
| 977 | 982  | 1 |
| 977 | 983  | 1 |
| 978 | 980  | 1 |
| 979 | 980  | 1 |
| 980 | 986  | 1 |
| 980 | 987  | 1 |
| 980 | 988  | 1 |
| 980 | 1011 | 1 |
| 980 | 1012 | 1 |
| 980 | 1038 | 1 |
| 981 | 984  | 1 |
| 981 | 985  | 1 |
| 981 | 1010 | 1 |
| 982 | 984  | 1 |
| 982 | 985  | 1 |
| 982 | 1010 | 1 |
| 983 | 989  | 1 |
| 983 | 990  | 1 |
| 983 | 991  | 1 |
| 983 | 1013 | 1 |
| 983 | 1014 | 1 |
| 983 | 1039 | 1 |
| 983 | 1040 | 1 |
| 983 | 1043 | 1 |
| 984 | 986  | 1 |
| 984 | 987  | 1 |
| 984 | 988  | 1 |
| 984 | 1011 | 1 |
| 984 | 1012 | 1 |
| 984 | 1038 | 1 |
| 985 | 992  | 1 |
| 985 | 993  | 1 |
| 985 | 994  | 1 |
| 985 | 1011 | 1 |
| 985 | 1012 | 1 |
| 985 | 1038 | 1 |
| 986 | 989  | 1 |
| 986 | 990  | 1 |
| 986 | 991  | 1 |
| 986 | 1010 | 1 |
| 987 | 989  | 1 |
| 987 | 990  | 1 |

|      |      |   |
|------|------|---|
| 987  | 991  | 1 |
| 987  | 1010 | 1 |
| 988  | 995  | 1 |
| 988  | 996  | 1 |
| 988  | 997  | 1 |
| 988  | 1010 | 1 |
| 989  | 992  | 1 |
| 989  | 993  | 1 |
| 989  | 994  | 1 |
| 990  | 992  | 1 |
| 990  | 993  | 1 |
| 990  | 994  | 1 |
| 991  | 998  | 1 |
| 991  | 999  | 1 |
| 991  | 1000 | 1 |
| 992  | 995  | 1 |
| 992  | 996  | 1 |
| 992  | 997  | 1 |
| 993  | 995  | 1 |
| 993  | 996  | 1 |
| 993  | 997  | 1 |
| 994  | 1001 | 1 |
| 994  | 1002 | 1 |
| 994  | 1003 | 1 |
| 995  | 998  | 1 |
| 995  | 999  | 1 |
| 995  | 1000 | 1 |
| 996  | 998  | 1 |
| 996  | 999  | 1 |
| 996  | 1000 | 1 |
| 997  | 1004 | 1 |
| 997  | 1005 | 1 |
| 997  | 1006 | 1 |
| 998  | 1001 | 1 |
| 998  | 1002 | 1 |
| 998  | 1003 | 1 |
| 999  | 1001 | 1 |
| 999  | 1002 | 1 |
| 999  | 1003 | 1 |
| 1000 | 1007 | 1 |
| 1000 | 1008 | 1 |
| 1000 | 1009 | 1 |
| 1001 | 1004 | 1 |
| 1001 | 1005 | 1 |
| 1001 | 1006 | 1 |
| 1002 | 1004 | 1 |
| 1002 | 1005 | 1 |
| 1002 | 1006 | 1 |
| 1004 | 1007 | 1 |
| 1004 | 1008 | 1 |
| 1004 | 1009 | 1 |
| 1005 | 1007 | 1 |
| 1005 | 1008 | 1 |
| 1005 | 1009 | 1 |

|      |      |   |
|------|------|---|
| 1010 | 1015 | 1 |
| 1010 | 1016 | 1 |
| 1010 | 1041 | 1 |
| 1010 | 1042 | 1 |
| 1010 | 1044 | 1 |
| 1010 | 1045 | 1 |
| 1010 | 1046 | 1 |
| 1011 | 1013 | 1 |
| 1011 | 1014 | 1 |
| 1011 | 1039 | 1 |
| 1011 | 1040 | 1 |
| 1011 | 1043 | 1 |
| 1012 | 1017 | 1 |
| 1012 | 1018 | 1 |
| 1012 | 1019 | 1 |
| 1012 | 1039 | 1 |
| 1012 | 1040 | 1 |
| 1012 | 1043 | 1 |
| 1013 | 1015 | 1 |
| 1013 | 1016 | 1 |
| 1013 | 1038 | 1 |
| 1014 | 1020 | 1 |
| 1014 | 1021 | 1 |
| 1014 | 1022 | 1 |
| 1014 | 1038 | 1 |
| 1015 | 1017 | 1 |
| 1015 | 1018 | 1 |
| 1015 | 1019 | 1 |
| 1016 | 1023 | 1 |
| 1016 | 1024 | 1 |
| 1016 | 1025 | 1 |
| 1017 | 1020 | 1 |
| 1017 | 1021 | 1 |
| 1017 | 1022 | 1 |
| 1018 | 1020 | 1 |
| 1018 | 1021 | 1 |
| 1018 | 1022 | 1 |
| 1019 | 1026 | 1 |
| 1019 | 1030 | 1 |
| 1019 | 1034 | 1 |
| 1020 | 1023 | 1 |
| 1020 | 1024 | 1 |
| 1020 | 1025 | 1 |
| 1021 | 1023 | 1 |
| 1021 | 1024 | 1 |
| 1021 | 1025 | 1 |
| 1022 | 1027 | 1 |
| 1022 | 1028 | 1 |
| 1022 | 1029 | 1 |
| 1022 | 1031 | 1 |
| 1022 | 1032 | 1 |
| 1022 | 1033 | 1 |
| 1022 | 1035 | 1 |
| 1022 | 1036 | 1 |

|      |      |   |
|------|------|---|
| 1022 | 1037 | 1 |
| 1023 | 1026 | 1 |
| 1023 | 1030 | 1 |
| 1023 | 1034 | 1 |
| 1024 | 1026 | 1 |
| 1024 | 1030 | 1 |
| 1024 | 1034 | 1 |
| 1026 | 1031 | 1 |
| 1026 | 1032 | 1 |
| 1026 | 1033 | 1 |
| 1026 | 1035 | 1 |
| 1026 | 1036 | 1 |
| 1026 | 1037 | 1 |
| 1027 | 1030 | 1 |
| 1027 | 1034 | 1 |
| 1028 | 1030 | 1 |
| 1028 | 1034 | 1 |
| 1029 | 1030 | 1 |
| 1029 | 1034 | 1 |
| 1030 | 1035 | 1 |
| 1030 | 1036 | 1 |
| 1030 | 1037 | 1 |
| 1031 | 1034 | 1 |
| 1032 | 1034 | 1 |
| 1033 | 1034 | 1 |
| 1038 | 1047 | 1 |
| 1038 | 1048 | 1 |
| 1038 | 1073 | 1 |
| 1039 | 1041 | 1 |
| 1039 | 1042 | 1 |
| 1039 | 1044 | 1 |
| 1039 | 1045 | 1 |
| 1039 | 1046 | 1 |
| 1040 | 1044 | 1 |
| 1040 | 1045 | 1 |
| 1040 | 1046 | 1 |
| 1041 | 1043 | 1 |
| 1042 | 1043 | 1 |
| 1043 | 1049 | 1 |
| 1043 | 1050 | 1 |
| 1043 | 1051 | 1 |
| 1043 | 1074 | 1 |
| 1043 | 1075 | 1 |
| 1043 | 1101 | 1 |
| 1044 | 1047 | 1 |
| 1044 | 1048 | 1 |
| 1044 | 1073 | 1 |
| 1045 | 1047 | 1 |
| 1045 | 1048 | 1 |
| 1045 | 1073 | 1 |
| 1046 | 1052 | 1 |
| 1046 | 1053 | 1 |
| 1046 | 1054 | 1 |
| 1046 | 1076 | 1 |



|      |      |   |
|------|------|---|
| 1046 | 1077 | 1 |
| 1046 | 1102 | 1 |
| 1046 | 1103 | 1 |
| 1046 | 1106 | 1 |
| 1047 | 1049 | 1 |
| 1047 | 1050 | 1 |
| 1047 | 1051 | 1 |
| 1047 | 1074 | 1 |
| 1047 | 1075 | 1 |
| 1047 | 1101 | 1 |
| 1048 | 1055 | 1 |
| 1048 | 1056 | 1 |
| 1048 | 1057 | 1 |
| 1048 | 1074 | 1 |
| 1048 | 1075 | 1 |
| 1048 | 1101 | 1 |
| 1049 | 1052 | 1 |
| 1049 | 1053 | 1 |
| 1049 | 1054 | 1 |
| 1049 | 1073 | 1 |
| 1050 | 1052 | 1 |
| 1050 | 1053 | 1 |
| 1050 | 1054 | 1 |
| 1050 | 1073 | 1 |
| 1051 | 1058 | 1 |
| 1051 | 1059 | 1 |
| 1051 | 1060 | 1 |
| 1051 | 1073 | 1 |
| 1052 | 1055 | 1 |
| 1052 | 1056 | 1 |
| 1052 | 1057 | 1 |
| 1053 | 1055 | 1 |
| 1053 | 1056 | 1 |
| 1053 | 1057 | 1 |
| 1054 | 1061 | 1 |
| 1054 | 1062 | 1 |
| 1054 | 1063 | 1 |
| 1055 | 1058 | 1 |
| 1055 | 1059 | 1 |
| 1055 | 1060 | 1 |
| 1056 | 1058 | 1 |
| 1056 | 1059 | 1 |
| 1056 | 1060 | 1 |
| 1057 | 1064 | 1 |
| 1057 | 1065 | 1 |
| 1057 | 1066 | 1 |
| 1058 | 1061 | 1 |
| 1058 | 1062 | 1 |
| 1058 | 1063 | 1 |
| 1059 | 1061 | 1 |
| 1059 | 1062 | 1 |
| 1059 | 1063 | 1 |
| 1060 | 1067 | 1 |
| 1060 | 1068 | 1 |

|      |      |   |
|------|------|---|
| 1060 | 1069 | 1 |
| 1061 | 1064 | 1 |
| 1061 | 1065 | 1 |
| 1061 | 1066 | 1 |
| 1062 | 1064 | 1 |
| 1062 | 1065 | 1 |
| 1062 | 1066 | 1 |
| 1063 | 1070 | 1 |
| 1063 | 1071 | 1 |
| 1063 | 1072 | 1 |
| 1064 | 1067 | 1 |
| 1064 | 1068 | 1 |
| 1064 | 1069 | 1 |
| 1065 | 1067 | 1 |
| 1065 | 1068 | 1 |
| 1065 | 1069 | 1 |
| 1067 | 1070 | 1 |
| 1067 | 1071 | 1 |
| 1067 | 1072 | 1 |
| 1068 | 1070 | 1 |
| 1068 | 1071 | 1 |
| 1068 | 1072 | 1 |
| 1073 | 1078 | 1 |
| 1073 | 1079 | 1 |
| 1073 | 1104 | 1 |
| 1073 | 1105 | 1 |
| 1073 | 1107 | 1 |
| 1073 | 1108 | 1 |
| 1073 | 1109 | 1 |
| 1074 | 1076 | 1 |
| 1074 | 1077 | 1 |
| 1074 | 1102 | 1 |
| 1074 | 1103 | 1 |
| 1074 | 1106 | 1 |
| 1075 | 1080 | 1 |
| 1075 | 1081 | 1 |
| 1075 | 1082 | 1 |
| 1075 | 1102 | 1 |
| 1075 | 1103 | 1 |
| 1075 | 1106 | 1 |
| 1076 | 1078 | 1 |
| 1076 | 1079 | 1 |
| 1076 | 1101 | 1 |
| 1077 | 1083 | 1 |
| 1077 | 1084 | 1 |
| 1077 | 1085 | 1 |
| 1077 | 1101 | 1 |
| 1078 | 1080 | 1 |
| 1078 | 1081 | 1 |
| 1078 | 1082 | 1 |
| 1079 | 1086 | 1 |
| 1079 | 1087 | 1 |
| 1079 | 1088 | 1 |
| 1080 | 1083 | 1 |

|      |      |   |
|------|------|---|
| 1080 | 1084 | 1 |
| 1080 | 1085 | 1 |
| 1081 | 1083 | 1 |
| 1081 | 1084 | 1 |
| 1081 | 1085 | 1 |
| 1082 | 1089 | 1 |
| 1082 | 1093 | 1 |
| 1082 | 1097 | 1 |
| 1083 | 1086 | 1 |
| 1083 | 1087 | 1 |
| 1083 | 1088 | 1 |
| 1084 | 1086 | 1 |
| 1084 | 1087 | 1 |
| 1084 | 1088 | 1 |
| 1085 | 1090 | 1 |
| 1085 | 1091 | 1 |
| 1085 | 1092 | 1 |
| 1085 | 1094 | 1 |
| 1085 | 1095 | 1 |
| 1085 | 1096 | 1 |
| 1085 | 1098 | 1 |
| 1085 | 1099 | 1 |
| 1085 | 1100 | 1 |
| 1086 | 1089 | 1 |
| 1086 | 1093 | 1 |
| 1086 | 1097 | 1 |
| 1087 | 1089 | 1 |
| 1087 | 1093 | 1 |
| 1087 | 1097 | 1 |
| 1089 | 1094 | 1 |
| 1089 | 1095 | 1 |
| 1089 | 1096 | 1 |
| 1089 | 1098 | 1 |
| 1089 | 1099 | 1 |
| 1089 | 1100 | 1 |
| 1090 | 1093 | 1 |
| 1090 | 1097 | 1 |
| 1091 | 1093 | 1 |
| 1091 | 1097 | 1 |
| 1092 | 1093 | 1 |
| 1092 | 1097 | 1 |
| 1093 | 1098 | 1 |
| 1093 | 1099 | 1 |
| 1093 | 1100 | 1 |
| 1094 | 1097 | 1 |
| 1095 | 1097 | 1 |
| 1096 | 1097 | 1 |
| 1101 | 1110 | 1 |
| 1101 | 1111 | 1 |
| 1101 | 1136 | 1 |
| 1102 | 1104 | 1 |
| 1102 | 1105 | 1 |
| 1102 | 1107 | 1 |
| 1102 | 1108 | 1 |

|      |      |   |
|------|------|---|
| 1102 | 1109 | 1 |
| 1103 | 1107 | 1 |
| 1103 | 1108 | 1 |
| 1103 | 1109 | 1 |
| 1104 | 1106 | 1 |
| 1105 | 1106 | 1 |
| 1106 | 1112 | 1 |
| 1106 | 1113 | 1 |
| 1106 | 1114 | 1 |
| 1106 | 1137 | 1 |
| 1106 | 1138 | 1 |
| 1106 | 1164 | 1 |
| 1107 | 1110 | 1 |
| 1107 | 1111 | 1 |
| 1107 | 1136 | 1 |
| 1108 | 1110 | 1 |
| 1108 | 1111 | 1 |
| 1108 | 1136 | 1 |
| 1109 | 1115 | 1 |
| 1109 | 1116 | 1 |
| 1109 | 1117 | 1 |
| 1109 | 1139 | 1 |
| 1109 | 1140 | 1 |
| 1109 | 1165 | 1 |
| 1109 | 1166 | 1 |
| 1109 | 1169 | 1 |
| 1110 | 1112 | 1 |
| 1110 | 1113 | 1 |
| 1110 | 1114 | 1 |
| 1110 | 1137 | 1 |
| 1110 | 1138 | 1 |
| 1110 | 1164 | 1 |
| 1111 | 1118 | 1 |
| 1111 | 1119 | 1 |
| 1111 | 1120 | 1 |
| 1111 | 1137 | 1 |
| 1111 | 1138 | 1 |
| 1111 | 1164 | 1 |
| 1112 | 1115 | 1 |
| 1112 | 1116 | 1 |
| 1112 | 1117 | 1 |
| 1112 | 1136 | 1 |
| 1113 | 1115 | 1 |
| 1113 | 1116 | 1 |
| 1113 | 1117 | 1 |
| 1113 | 1136 | 1 |
| 1114 | 1121 | 1 |
| 1114 | 1122 | 1 |
| 1114 | 1123 | 1 |
| 1114 | 1136 | 1 |
| 1115 | 1118 | 1 |
| 1115 | 1119 | 1 |
| 1115 | 1120 | 1 |
| 1116 | 1118 | 1 |

|      |      |   |
|------|------|---|
| 1116 | 1119 | 1 |
| 1116 | 1120 | 1 |
| 1117 | 1124 | 1 |
| 1117 | 1125 | 1 |
| 1117 | 1126 | 1 |
| 1118 | 1121 | 1 |
| 1118 | 1122 | 1 |
| 1118 | 1123 | 1 |
| 1119 | 1121 | 1 |
| 1119 | 1122 | 1 |
| 1119 | 1123 | 1 |
| 1120 | 1127 | 1 |
| 1120 | 1128 | 1 |
| 1120 | 1129 | 1 |
| 1121 | 1124 | 1 |
| 1121 | 1125 | 1 |
| 1121 | 1126 | 1 |
| 1122 | 1124 | 1 |
| 1122 | 1125 | 1 |
| 1122 | 1126 | 1 |
| 1123 | 1130 | 1 |
| 1123 | 1131 | 1 |
| 1123 | 1132 | 1 |
| 1124 | 1127 | 1 |
| 1124 | 1128 | 1 |
| 1124 | 1129 | 1 |
| 1125 | 1127 | 1 |
| 1125 | 1128 | 1 |
| 1125 | 1129 | 1 |
| 1126 | 1133 | 1 |
| 1126 | 1134 | 1 |
| 1126 | 1135 | 1 |
| 1127 | 1130 | 1 |
| 1127 | 1131 | 1 |
| 1127 | 1132 | 1 |
| 1128 | 1130 | 1 |
| 1128 | 1131 | 1 |
| 1128 | 1132 | 1 |
| 1130 | 1133 | 1 |
| 1130 | 1134 | 1 |
| 1130 | 1135 | 1 |
| 1131 | 1133 | 1 |
| 1131 | 1134 | 1 |
| 1131 | 1135 | 1 |
| 1136 | 1141 | 1 |
| 1136 | 1142 | 1 |
| 1136 | 1167 | 1 |
| 1136 | 1168 | 1 |
| 1136 | 1170 | 1 |
| 1136 | 1171 | 1 |
| 1136 | 1172 | 1 |
| 1137 | 1139 | 1 |
| 1137 | 1140 | 1 |
| 1137 | 1165 | 1 |

|      |      |   |
|------|------|---|
| 1137 | 1166 | 1 |
| 1137 | 1169 | 1 |
| 1138 | 1143 | 1 |
| 1138 | 1144 | 1 |
| 1138 | 1145 | 1 |
| 1138 | 1165 | 1 |
| 1138 | 1166 | 1 |
| 1138 | 1169 | 1 |
| 1139 | 1141 | 1 |
| 1139 | 1142 | 1 |
| 1139 | 1164 | 1 |
| 1140 | 1146 | 1 |
| 1140 | 1147 | 1 |
| 1140 | 1148 | 1 |
| 1140 | 1164 | 1 |
| 1141 | 1143 | 1 |
| 1141 | 1144 | 1 |
| 1141 | 1145 | 1 |
| 1142 | 1149 | 1 |
| 1142 | 1150 | 1 |
| 1142 | 1151 | 1 |
| 1143 | 1146 | 1 |
| 1143 | 1147 | 1 |
| 1143 | 1148 | 1 |
| 1144 | 1146 | 1 |
| 1144 | 1147 | 1 |
| 1144 | 1148 | 1 |
| 1145 | 1152 | 1 |
| 1145 | 1156 | 1 |
| 1145 | 1160 | 1 |
| 1146 | 1149 | 1 |
| 1146 | 1150 | 1 |
| 1146 | 1151 | 1 |
| 1147 | 1149 | 1 |
| 1147 | 1150 | 1 |
| 1147 | 1151 | 1 |
| 1148 | 1153 | 1 |
| 1148 | 1154 | 1 |
| 1148 | 1155 | 1 |
| 1148 | 1157 | 1 |
| 1148 | 1158 | 1 |
| 1148 | 1159 | 1 |
| 1148 | 1161 | 1 |
| 1148 | 1162 | 1 |
| 1148 | 1163 | 1 |
| 1149 | 1152 | 1 |
| 1149 | 1156 | 1 |
| 1149 | 1160 | 1 |
| 1150 | 1152 | 1 |
| 1150 | 1156 | 1 |
| 1150 | 1160 | 1 |
| 1152 | 1157 | 1 |
| 1152 | 1158 | 1 |
| 1152 | 1159 | 1 |

|      |      |   |
|------|------|---|
| 1152 | 1161 | 1 |
| 1152 | 1162 | 1 |
| 1152 | 1163 | 1 |
| 1153 | 1156 | 1 |
| 1153 | 1160 | 1 |
| 1154 | 1156 | 1 |
| 1154 | 1160 | 1 |
| 1155 | 1156 | 1 |
| 1155 | 1160 | 1 |
| 1156 | 1161 | 1 |
| 1156 | 1162 | 1 |
| 1156 | 1163 | 1 |
| 1157 | 1160 | 1 |
| 1158 | 1160 | 1 |
| 1159 | 1160 | 1 |
| 1164 | 1173 | 1 |
| 1164 | 1174 | 1 |
| 1164 | 1199 | 1 |
| 1165 | 1167 | 1 |
| 1165 | 1168 | 1 |
| 1165 | 1170 | 1 |
| 1165 | 1171 | 1 |
| 1165 | 1172 | 1 |
| 1166 | 1170 | 1 |
| 1166 | 1171 | 1 |
| 1166 | 1172 | 1 |
| 1167 | 1169 | 1 |
| 1168 | 1169 | 1 |
| 1169 | 1175 | 1 |
| 1169 | 1176 | 1 |
| 1169 | 1177 | 1 |
| 1169 | 1200 | 1 |
| 1169 | 1201 | 1 |
| 1169 | 1227 | 1 |
| 1170 | 1173 | 1 |
| 1170 | 1174 | 1 |
| 1170 | 1199 | 1 |
| 1171 | 1173 | 1 |
| 1171 | 1174 | 1 |
| 1171 | 1199 | 1 |
| 1172 | 1178 | 1 |
| 1172 | 1179 | 1 |
| 1172 | 1180 | 1 |
| 1172 | 1202 | 1 |
| 1172 | 1203 | 1 |
| 1172 | 1228 | 1 |
| 1172 | 1229 | 1 |
| 1172 | 1232 | 1 |
| 1173 | 1175 | 1 |
| 1173 | 1176 | 1 |
| 1173 | 1177 | 1 |
| 1173 | 1200 | 1 |
| 1173 | 1201 | 1 |
| 1173 | 1227 | 1 |

|      |      |   |
|------|------|---|
| 1174 | 1181 | 1 |
| 1174 | 1182 | 1 |
| 1174 | 1183 | 1 |
| 1174 | 1200 | 1 |
| 1174 | 1201 | 1 |
| 1174 | 1227 | 1 |
| 1175 | 1178 | 1 |
| 1175 | 1179 | 1 |
| 1175 | 1180 | 1 |
| 1175 | 1199 | 1 |
| 1176 | 1178 | 1 |
| 1176 | 1179 | 1 |
| 1176 | 1180 | 1 |
| 1176 | 1199 | 1 |
| 1177 | 1184 | 1 |
| 1177 | 1185 | 1 |
| 1177 | 1186 | 1 |
| 1177 | 1199 | 1 |
| 1178 | 1181 | 1 |
| 1178 | 1182 | 1 |
| 1178 | 1183 | 1 |
| 1179 | 1181 | 1 |
| 1179 | 1182 | 1 |
| 1179 | 1183 | 1 |
| 1180 | 1187 | 1 |
| 1180 | 1188 | 1 |
| 1180 | 1189 | 1 |
| 1181 | 1184 | 1 |
| 1181 | 1185 | 1 |
| 1181 | 1186 | 1 |
| 1182 | 1184 | 1 |
| 1182 | 1185 | 1 |
| 1182 | 1186 | 1 |
| 1183 | 1190 | 1 |
| 1183 | 1191 | 1 |
| 1183 | 1192 | 1 |
| 1184 | 1187 | 1 |
| 1184 | 1188 | 1 |
| 1184 | 1189 | 1 |
| 1185 | 1187 | 1 |
| 1185 | 1188 | 1 |
| 1185 | 1189 | 1 |
| 1186 | 1193 | 1 |
| 1186 | 1194 | 1 |
| 1186 | 1195 | 1 |
| 1187 | 1190 | 1 |
| 1187 | 1191 | 1 |
| 1187 | 1192 | 1 |
| 1188 | 1190 | 1 |
| 1188 | 1191 | 1 |
| 1188 | 1192 | 1 |
| 1189 | 1196 | 1 |
| 1189 | 1197 | 1 |
| 1189 | 1198 | 1 |



|      |      |   |
|------|------|---|
| 1190 | 1193 | 1 |
| 1190 | 1194 | 1 |
| 1190 | 1195 | 1 |
| 1191 | 1193 | 1 |
| 1191 | 1194 | 1 |
| 1191 | 1195 | 1 |
| 1193 | 1196 | 1 |
| 1193 | 1197 | 1 |
| 1193 | 1198 | 1 |
| 1194 | 1196 | 1 |
| 1194 | 1197 | 1 |
| 1194 | 1198 | 1 |
| 1199 | 1204 | 1 |
| 1199 | 1205 | 1 |
| 1199 | 1230 | 1 |
| 1199 | 1231 | 1 |
| 1199 | 1233 | 1 |
| 1199 | 1234 | 1 |
| 1199 | 1235 | 1 |
| 1200 | 1202 | 1 |
| 1200 | 1203 | 1 |
| 1200 | 1228 | 1 |
| 1200 | 1229 | 1 |
| 1200 | 1232 | 1 |
| 1201 | 1206 | 1 |
| 1201 | 1207 | 1 |
| 1201 | 1208 | 1 |
| 1201 | 1228 | 1 |
| 1201 | 1229 | 1 |
| 1201 | 1232 | 1 |
| 1202 | 1204 | 1 |
| 1202 | 1205 | 1 |
| 1202 | 1227 | 1 |
| 1203 | 1209 | 1 |
| 1203 | 1210 | 1 |
| 1203 | 1211 | 1 |
| 1203 | 1227 | 1 |
| 1204 | 1206 | 1 |
| 1204 | 1207 | 1 |
| 1204 | 1208 | 1 |
| 1205 | 1212 | 1 |
| 1205 | 1213 | 1 |
| 1205 | 1214 | 1 |
| 1206 | 1209 | 1 |
| 1206 | 1210 | 1 |
| 1206 | 1211 | 1 |
| 1207 | 1209 | 1 |
| 1207 | 1210 | 1 |
| 1207 | 1211 | 1 |
| 1208 | 1215 | 1 |
| 1208 | 1219 | 1 |
| 1208 | 1223 | 1 |
| 1209 | 1212 | 1 |
| 1209 | 1213 | 1 |

|      |      |   |
|------|------|---|
| 1209 | 1214 | 1 |
| 1210 | 1212 | 1 |
| 1210 | 1213 | 1 |
| 1210 | 1214 | 1 |
| 1211 | 1216 | 1 |
| 1211 | 1217 | 1 |
| 1211 | 1218 | 1 |
| 1211 | 1220 | 1 |
| 1211 | 1221 | 1 |
| 1211 | 1222 | 1 |
| 1211 | 1224 | 1 |
| 1211 | 1225 | 1 |
| 1211 | 1226 | 1 |
| 1212 | 1215 | 1 |
| 1212 | 1219 | 1 |
| 1212 | 1223 | 1 |
| 1213 | 1215 | 1 |
| 1213 | 1219 | 1 |
| 1213 | 1223 | 1 |
| 1215 | 1220 | 1 |
| 1215 | 1221 | 1 |
| 1215 | 1222 | 1 |
| 1215 | 1224 | 1 |
| 1215 | 1225 | 1 |
| 1215 | 1226 | 1 |
| 1216 | 1219 | 1 |
| 1216 | 1223 | 1 |
| 1217 | 1219 | 1 |
| 1217 | 1223 | 1 |
| 1218 | 1219 | 1 |
| 1218 | 1223 | 1 |
| 1219 | 1224 | 1 |
| 1219 | 1225 | 1 |
| 1219 | 1226 | 1 |
| 1220 | 1223 | 1 |
| 1221 | 1223 | 1 |
| 1222 | 1223 | 1 |
| 1227 | 1236 | 1 |
| 1227 | 1237 | 1 |
| 1227 | 1262 | 1 |
| 1228 | 1230 | 1 |
| 1228 | 1231 | 1 |
| 1228 | 1233 | 1 |
| 1228 | 1234 | 1 |
| 1228 | 1235 | 1 |
| 1229 | 1233 | 1 |
| 1229 | 1234 | 1 |
| 1229 | 1235 | 1 |
| 1230 | 1232 | 1 |
| 1231 | 1232 | 1 |
| 1232 | 1238 | 1 |
| 1232 | 1239 | 1 |
| 1232 | 1240 | 1 |
| 1232 | 1263 | 1 |

|      |      |   |
|------|------|---|
| 1232 | 1264 | 1 |
| 1232 | 1290 | 1 |
| 1233 | 1236 | 1 |
| 1233 | 1237 | 1 |
| 1233 | 1262 | 1 |
| 1234 | 1236 | 1 |
| 1234 | 1237 | 1 |
| 1234 | 1262 | 1 |
| 1235 | 1241 | 1 |
| 1235 | 1242 | 1 |
| 1235 | 1243 | 1 |
| 1235 | 1265 | 1 |
| 1235 | 1266 | 1 |
| 1235 | 1291 | 1 |
| 1235 | 1292 | 1 |
| 1235 | 1295 | 1 |
| 1236 | 1238 | 1 |
| 1236 | 1239 | 1 |
| 1236 | 1240 | 1 |
| 1236 | 1263 | 1 |
| 1236 | 1264 | 1 |
| 1236 | 1290 | 1 |
| 1237 | 1244 | 1 |
| 1237 | 1245 | 1 |
| 1237 | 1246 | 1 |
| 1237 | 1263 | 1 |
| 1237 | 1264 | 1 |
| 1237 | 1290 | 1 |
| 1238 | 1241 | 1 |
| 1238 | 1242 | 1 |
| 1238 | 1243 | 1 |
| 1238 | 1262 | 1 |
| 1239 | 1241 | 1 |
| 1239 | 1242 | 1 |
| 1239 | 1243 | 1 |
| 1239 | 1262 | 1 |
| 1240 | 1247 | 1 |
| 1240 | 1248 | 1 |
| 1240 | 1249 | 1 |
| 1240 | 1262 | 1 |
| 1241 | 1244 | 1 |
| 1241 | 1245 | 1 |
| 1241 | 1246 | 1 |
| 1242 | 1244 | 1 |
| 1242 | 1245 | 1 |
| 1242 | 1246 | 1 |
| 1243 | 1250 | 1 |
| 1243 | 1251 | 1 |
| 1243 | 1252 | 1 |
| 1244 | 1247 | 1 |
| 1244 | 1248 | 1 |
| 1244 | 1249 | 1 |
| 1245 | 1247 | 1 |
| 1245 | 1248 | 1 |

|      |      |   |
|------|------|---|
| 1245 | 1249 | 1 |
| 1246 | 1253 | 1 |
| 1246 | 1254 | 1 |
| 1246 | 1255 | 1 |
| 1247 | 1250 | 1 |
| 1247 | 1251 | 1 |
| 1247 | 1252 | 1 |
| 1248 | 1250 | 1 |
| 1248 | 1251 | 1 |
| 1248 | 1252 | 1 |
| 1249 | 1256 | 1 |
| 1249 | 1257 | 1 |
| 1249 | 1258 | 1 |
| 1250 | 1253 | 1 |
| 1250 | 1254 | 1 |
| 1250 | 1255 | 1 |
| 1251 | 1253 | 1 |
| 1251 | 1254 | 1 |
| 1251 | 1255 | 1 |
| 1252 | 1259 | 1 |
| 1252 | 1260 | 1 |
| 1252 | 1261 | 1 |
| 1253 | 1256 | 1 |
| 1253 | 1257 | 1 |
| 1253 | 1258 | 1 |
| 1254 | 1256 | 1 |
| 1254 | 1257 | 1 |
| 1254 | 1258 | 1 |
| 1256 | 1259 | 1 |
| 1256 | 1260 | 1 |
| 1256 | 1261 | 1 |
| 1257 | 1259 | 1 |
| 1257 | 1260 | 1 |
| 1257 | 1261 | 1 |
| 1262 | 1267 | 1 |
| 1262 | 1268 | 1 |
| 1262 | 1293 | 1 |
| 1262 | 1294 | 1 |
| 1262 | 1296 | 1 |
| 1262 | 1297 | 1 |
| 1262 | 1298 | 1 |
| 1263 | 1265 | 1 |
| 1263 | 1266 | 1 |
| 1263 | 1291 | 1 |
| 1263 | 1292 | 1 |
| 1263 | 1295 | 1 |
| 1264 | 1269 | 1 |
| 1264 | 1270 | 1 |
| 1264 | 1271 | 1 |
| 1264 | 1291 | 1 |
| 1264 | 1292 | 1 |
| 1264 | 1295 | 1 |
| 1265 | 1267 | 1 |
| 1265 | 1268 | 1 |

|      |      |   |
|------|------|---|
| 1265 | 1290 | 1 |
| 1266 | 1272 | 1 |
| 1266 | 1273 | 1 |
| 1266 | 1274 | 1 |
| 1266 | 1290 | 1 |
| 1267 | 1269 | 1 |
| 1267 | 1270 | 1 |
| 1267 | 1271 | 1 |
| 1268 | 1275 | 1 |
| 1268 | 1276 | 1 |
| 1268 | 1277 | 1 |
| 1269 | 1272 | 1 |
| 1269 | 1273 | 1 |
| 1269 | 1274 | 1 |
| 1270 | 1272 | 1 |
| 1270 | 1273 | 1 |
| 1270 | 1274 | 1 |
| 1271 | 1278 | 1 |
| 1271 | 1282 | 1 |
| 1271 | 1286 | 1 |
| 1272 | 1275 | 1 |
| 1272 | 1276 | 1 |
| 1272 | 1277 | 1 |
| 1273 | 1275 | 1 |
| 1273 | 1276 | 1 |
| 1273 | 1277 | 1 |
| 1274 | 1279 | 1 |
| 1274 | 1280 | 1 |
| 1274 | 1281 | 1 |
| 1274 | 1283 | 1 |
| 1274 | 1284 | 1 |
| 1274 | 1285 | 1 |
| 1274 | 1287 | 1 |
| 1274 | 1288 | 1 |
| 1274 | 1289 | 1 |
| 1275 | 1278 | 1 |
| 1275 | 1282 | 1 |
| 1275 | 1286 | 1 |
| 1276 | 1278 | 1 |
| 1276 | 1282 | 1 |
| 1276 | 1286 | 1 |
| 1278 | 1283 | 1 |
| 1278 | 1284 | 1 |
| 1278 | 1285 | 1 |
| 1278 | 1287 | 1 |
| 1278 | 1288 | 1 |
| 1278 | 1289 | 1 |
| 1279 | 1282 | 1 |
| 1279 | 1286 | 1 |
| 1280 | 1282 | 1 |
| 1280 | 1286 | 1 |
| 1281 | 1282 | 1 |
| 1281 | 1286 | 1 |
| 1282 | 1287 | 1 |

|      |      |   |
|------|------|---|
| 1282 | 1288 | 1 |
| 1282 | 1289 | 1 |
| 1283 | 1286 | 1 |
| 1284 | 1286 | 1 |
| 1285 | 1286 | 1 |
| 1290 | 1299 | 1 |
| 1290 | 1300 | 1 |
| 1290 | 1325 | 1 |
| 1291 | 1293 | 1 |
| 1291 | 1294 | 1 |
| 1291 | 1296 | 1 |
| 1291 | 1297 | 1 |
| 1291 | 1298 | 1 |
| 1292 | 1296 | 1 |
| 1292 | 1297 | 1 |
| 1292 | 1298 | 1 |
| 1293 | 1295 | 1 |
| 1294 | 1295 | 1 |
| 1295 | 1301 | 1 |
| 1295 | 1302 | 1 |
| 1295 | 1303 | 1 |
| 1295 | 1326 | 1 |
| 1295 | 1327 | 1 |
| 1295 | 1353 | 1 |
| 1296 | 1299 | 1 |
| 1296 | 1300 | 1 |
| 1296 | 1325 | 1 |
| 1297 | 1299 | 1 |
| 1297 | 1300 | 1 |
| 1297 | 1325 | 1 |
| 1298 | 1304 | 1 |
| 1298 | 1305 | 1 |
| 1298 | 1306 | 1 |
| 1298 | 1328 | 1 |
| 1298 | 1329 | 1 |
| 1298 | 1354 | 1 |
| 1298 | 1355 | 1 |
| 1298 | 1358 | 1 |
| 1299 | 1301 | 1 |
| 1299 | 1302 | 1 |
| 1299 | 1303 | 1 |
| 1299 | 1326 | 1 |
| 1299 | 1327 | 1 |
| 1299 | 1353 | 1 |
| 1300 | 1307 | 1 |
| 1300 | 1308 | 1 |
| 1300 | 1309 | 1 |
| 1300 | 1326 | 1 |
| 1300 | 1327 | 1 |
| 1300 | 1353 | 1 |
| 1301 | 1304 | 1 |
| 1301 | 1305 | 1 |
| 1301 | 1306 | 1 |
| 1301 | 1325 | 1 |

|      |      |   |
|------|------|---|
| 1302 | 1304 | 1 |
| 1302 | 1305 | 1 |
| 1302 | 1306 | 1 |
| 1302 | 1325 | 1 |
| 1303 | 1310 | 1 |
| 1303 | 1311 | 1 |
| 1303 | 1312 | 1 |
| 1303 | 1325 | 1 |
| 1304 | 1307 | 1 |
| 1304 | 1308 | 1 |
| 1304 | 1309 | 1 |
| 1305 | 1307 | 1 |
| 1305 | 1308 | 1 |
| 1305 | 1309 | 1 |
| 1306 | 1313 | 1 |
| 1306 | 1314 | 1 |
| 1306 | 1315 | 1 |
| 1307 | 1310 | 1 |
| 1307 | 1311 | 1 |
| 1307 | 1312 | 1 |
| 1308 | 1310 | 1 |
| 1308 | 1311 | 1 |
| 1308 | 1312 | 1 |
| 1309 | 1316 | 1 |
| 1309 | 1317 | 1 |
| 1309 | 1318 | 1 |
| 1310 | 1313 | 1 |
| 1310 | 1314 | 1 |
| 1310 | 1315 | 1 |
| 1311 | 1313 | 1 |
| 1311 | 1314 | 1 |
| 1311 | 1315 | 1 |
| 1312 | 1319 | 1 |
| 1312 | 1320 | 1 |
| 1312 | 1321 | 1 |
| 1313 | 1316 | 1 |
| 1313 | 1317 | 1 |
| 1313 | 1318 | 1 |
| 1314 | 1316 | 1 |
| 1314 | 1317 | 1 |
| 1314 | 1318 | 1 |
| 1315 | 1322 | 1 |
| 1315 | 1323 | 1 |
| 1315 | 1324 | 1 |
| 1316 | 1319 | 1 |
| 1316 | 1320 | 1 |
| 1316 | 1321 | 1 |
| 1317 | 1319 | 1 |
| 1317 | 1320 | 1 |
| 1317 | 1321 | 1 |
| 1319 | 1322 | 1 |
| 1319 | 1323 | 1 |
| 1319 | 1324 | 1 |
| 1320 | 1322 | 1 |

|      |      |   |
|------|------|---|
| 1320 | 1323 | 1 |
| 1320 | 1324 | 1 |
| 1325 | 1330 | 1 |
| 1325 | 1331 | 1 |
| 1325 | 1356 | 1 |
| 1325 | 1357 | 1 |
| 1325 | 1359 | 1 |
| 1325 | 1360 | 1 |
| 1325 | 1361 | 1 |
| 1326 | 1328 | 1 |
| 1326 | 1329 | 1 |
| 1326 | 1354 | 1 |
| 1326 | 1355 | 1 |
| 1326 | 1358 | 1 |
| 1327 | 1332 | 1 |
| 1327 | 1333 | 1 |
| 1327 | 1334 | 1 |
| 1327 | 1354 | 1 |
| 1327 | 1355 | 1 |
| 1327 | 1358 | 1 |
| 1328 | 1330 | 1 |
| 1328 | 1331 | 1 |
| 1328 | 1353 | 1 |
| 1329 | 1335 | 1 |
| 1329 | 1336 | 1 |
| 1329 | 1337 | 1 |
| 1329 | 1353 | 1 |
| 1330 | 1332 | 1 |
| 1330 | 1333 | 1 |
| 1330 | 1334 | 1 |
| 1331 | 1338 | 1 |
| 1331 | 1339 | 1 |
| 1331 | 1340 | 1 |
| 1332 | 1335 | 1 |
| 1332 | 1336 | 1 |
| 1332 | 1337 | 1 |
| 1333 | 1335 | 1 |
| 1333 | 1336 | 1 |
| 1333 | 1337 | 1 |
| 1334 | 1341 | 1 |
| 1334 | 1345 | 1 |
| 1334 | 1349 | 1 |
| 1335 | 1338 | 1 |
| 1335 | 1339 | 1 |
| 1335 | 1340 | 1 |
| 1336 | 1338 | 1 |
| 1336 | 1339 | 1 |
| 1336 | 1340 | 1 |
| 1337 | 1342 | 1 |
| 1337 | 1343 | 1 |
| 1337 | 1344 | 1 |
| 1337 | 1346 | 1 |
| 1337 | 1347 | 1 |
| 1337 | 1348 | 1 |



|      |      |   |
|------|------|---|
| 1337 | 1350 | 1 |
| 1337 | 1351 | 1 |
| 1337 | 1352 | 1 |
| 1338 | 1341 | 1 |
| 1338 | 1345 | 1 |
| 1338 | 1349 | 1 |
| 1339 | 1341 | 1 |
| 1339 | 1345 | 1 |
| 1339 | 1349 | 1 |
| 1341 | 1346 | 1 |
| 1341 | 1347 | 1 |
| 1341 | 1348 | 1 |
| 1341 | 1350 | 1 |
| 1341 | 1351 | 1 |
| 1341 | 1352 | 1 |
| 1342 | 1345 | 1 |
| 1342 | 1349 | 1 |
| 1343 | 1345 | 1 |
| 1343 | 1349 | 1 |
| 1344 | 1345 | 1 |
| 1344 | 1349 | 1 |
| 1345 | 1350 | 1 |
| 1345 | 1351 | 1 |
| 1345 | 1352 | 1 |
| 1346 | 1349 | 1 |
| 1347 | 1349 | 1 |
| 1348 | 1349 | 1 |
| 1353 | 1362 | 1 |
| 1353 | 1363 | 1 |
| 1353 | 1388 | 1 |
| 1354 | 1356 | 1 |
| 1354 | 1357 | 1 |
| 1354 | 1359 | 1 |
| 1354 | 1360 | 1 |
| 1354 | 1361 | 1 |
| 1355 | 1359 | 1 |
| 1355 | 1360 | 1 |
| 1355 | 1361 | 1 |
| 1356 | 1358 | 1 |
| 1357 | 1358 | 1 |
| 1358 | 1364 | 1 |
| 1358 | 1365 | 1 |
| 1358 | 1366 | 1 |
| 1358 | 1389 | 1 |
| 1358 | 1390 | 1 |
| 1358 | 1416 | 1 |
| 1359 | 1362 | 1 |
| 1359 | 1363 | 1 |
| 1359 | 1388 | 1 |
| 1360 | 1362 | 1 |
| 1360 | 1363 | 1 |
| 1360 | 1388 | 1 |
| 1361 | 1367 | 1 |
| 1361 | 1368 | 1 |

|      |      |   |
|------|------|---|
| 1361 | 1369 | 1 |
| 1361 | 1391 | 1 |
| 1361 | 1392 | 1 |
| 1361 | 1417 | 1 |
| 1361 | 1418 | 1 |
| 1361 | 1421 | 1 |
| 1362 | 1364 | 1 |
| 1362 | 1365 | 1 |
| 1362 | 1366 | 1 |
| 1362 | 1389 | 1 |
| 1362 | 1390 | 1 |
| 1362 | 1416 | 1 |
| 1363 | 1370 | 1 |
| 1363 | 1371 | 1 |
| 1363 | 1372 | 1 |
| 1363 | 1389 | 1 |
| 1363 | 1390 | 1 |
| 1363 | 1416 | 1 |
| 1364 | 1367 | 1 |
| 1364 | 1368 | 1 |
| 1364 | 1369 | 1 |
| 1364 | 1388 | 1 |
| 1365 | 1367 | 1 |
| 1365 | 1368 | 1 |
| 1365 | 1369 | 1 |
| 1365 | 1388 | 1 |
| 1366 | 1373 | 1 |
| 1366 | 1374 | 1 |
| 1366 | 1375 | 1 |
| 1366 | 1388 | 1 |
| 1367 | 1370 | 1 |
| 1367 | 1371 | 1 |
| 1367 | 1372 | 1 |
| 1368 | 1370 | 1 |
| 1368 | 1371 | 1 |
| 1368 | 1372 | 1 |
| 1369 | 1376 | 1 |
| 1369 | 1377 | 1 |
| 1369 | 1378 | 1 |
| 1370 | 1373 | 1 |
| 1370 | 1374 | 1 |
| 1370 | 1375 | 1 |
| 1371 | 1373 | 1 |
| 1371 | 1374 | 1 |
| 1371 | 1375 | 1 |
| 1372 | 1379 | 1 |
| 1372 | 1380 | 1 |
| 1372 | 1381 | 1 |
| 1373 | 1376 | 1 |
| 1373 | 1377 | 1 |
| 1373 | 1378 | 1 |
| 1374 | 1376 | 1 |
| 1374 | 1377 | 1 |
| 1374 | 1378 | 1 |

|      |      |   |
|------|------|---|
| 1375 | 1382 | 1 |
| 1375 | 1383 | 1 |
| 1375 | 1384 | 1 |
| 1376 | 1379 | 1 |
| 1376 | 1380 | 1 |
| 1376 | 1381 | 1 |
| 1377 | 1379 | 1 |
| 1377 | 1380 | 1 |
| 1377 | 1381 | 1 |
| 1378 | 1385 | 1 |
| 1378 | 1386 | 1 |
| 1378 | 1387 | 1 |
| 1379 | 1382 | 1 |
| 1379 | 1383 | 1 |
| 1379 | 1384 | 1 |
| 1380 | 1382 | 1 |
| 1380 | 1383 | 1 |
| 1380 | 1384 | 1 |
| 1382 | 1385 | 1 |
| 1382 | 1386 | 1 |
| 1382 | 1387 | 1 |
| 1383 | 1385 | 1 |
| 1383 | 1386 | 1 |
| 1383 | 1387 | 1 |
| 1388 | 1393 | 1 |
| 1388 | 1394 | 1 |
| 1388 | 1419 | 1 |
| 1388 | 1420 | 1 |
| 1388 | 1422 | 1 |
| 1388 | 1423 | 1 |
| 1388 | 1424 | 1 |
| 1389 | 1391 | 1 |
| 1389 | 1392 | 1 |
| 1389 | 1417 | 1 |
| 1389 | 1418 | 1 |
| 1389 | 1421 | 1 |
| 1390 | 1395 | 1 |
| 1390 | 1396 | 1 |
| 1390 | 1397 | 1 |
| 1390 | 1417 | 1 |
| 1390 | 1418 | 1 |
| 1390 | 1421 | 1 |
| 1391 | 1393 | 1 |
| 1391 | 1394 | 1 |
| 1391 | 1416 | 1 |
| 1392 | 1398 | 1 |
| 1392 | 1399 | 1 |
| 1392 | 1400 | 1 |
| 1392 | 1416 | 1 |
| 1393 | 1395 | 1 |
| 1393 | 1396 | 1 |
| 1393 | 1397 | 1 |
| 1394 | 1401 | 1 |
| 1394 | 1402 | 1 |

|      |      |   |
|------|------|---|
| 1394 | 1403 | 1 |
| 1395 | 1398 | 1 |
| 1395 | 1399 | 1 |
| 1395 | 1400 | 1 |
| 1396 | 1398 | 1 |
| 1396 | 1399 | 1 |
| 1396 | 1400 | 1 |
| 1397 | 1404 | 1 |
| 1397 | 1408 | 1 |
| 1397 | 1412 | 1 |
| 1398 | 1401 | 1 |
| 1398 | 1402 | 1 |
| 1398 | 1403 | 1 |
| 1399 | 1401 | 1 |
| 1399 | 1402 | 1 |
| 1399 | 1403 | 1 |
| 1400 | 1405 | 1 |
| 1400 | 1406 | 1 |
| 1400 | 1407 | 1 |
| 1400 | 1409 | 1 |
| 1400 | 1410 | 1 |
| 1400 | 1411 | 1 |
| 1400 | 1413 | 1 |
| 1400 | 1414 | 1 |
| 1400 | 1415 | 1 |
| 1401 | 1404 | 1 |
| 1401 | 1408 | 1 |
| 1401 | 1412 | 1 |
| 1402 | 1404 | 1 |
| 1402 | 1408 | 1 |
| 1402 | 1412 | 1 |
| 1404 | 1409 | 1 |
| 1404 | 1410 | 1 |
| 1404 | 1411 | 1 |
| 1404 | 1413 | 1 |
| 1404 | 1414 | 1 |
| 1404 | 1415 | 1 |
| 1405 | 1408 | 1 |
| 1405 | 1412 | 1 |
| 1406 | 1408 | 1 |
| 1406 | 1412 | 1 |
| 1407 | 1408 | 1 |
| 1407 | 1412 | 1 |
| 1408 | 1413 | 1 |
| 1408 | 1414 | 1 |
| 1408 | 1415 | 1 |
| 1409 | 1412 | 1 |
| 1410 | 1412 | 1 |
| 1411 | 1412 | 1 |
| 1416 | 1425 | 1 |
| 1416 | 1426 | 1 |
| 1416 | 1451 | 1 |
| 1417 | 1419 | 1 |
| 1417 | 1420 | 1 |

|      |      |   |
|------|------|---|
| 1417 | 1422 | 1 |
| 1417 | 1423 | 1 |
| 1417 | 1424 | 1 |
| 1418 | 1422 | 1 |
| 1418 | 1423 | 1 |
| 1418 | 1424 | 1 |
| 1419 | 1421 | 1 |
| 1420 | 1421 | 1 |
| 1421 | 1427 | 1 |
| 1421 | 1428 | 1 |
| 1421 | 1429 | 1 |
| 1421 | 1452 | 1 |
| 1421 | 1453 | 1 |
| 1421 | 1479 | 1 |
| 1422 | 1425 | 1 |
| 1422 | 1426 | 1 |
| 1422 | 1451 | 1 |
| 1423 | 1425 | 1 |
| 1423 | 1426 | 1 |
| 1423 | 1451 | 1 |
| 1424 | 1430 | 1 |
| 1424 | 1431 | 1 |
| 1424 | 1432 | 1 |
| 1424 | 1454 | 1 |
| 1424 | 1455 | 1 |
| 1424 | 1480 | 1 |
| 1424 | 1481 | 1 |
| 1424 | 1484 | 1 |
| 1425 | 1427 | 1 |
| 1425 | 1428 | 1 |
| 1425 | 1429 | 1 |
| 1425 | 1452 | 1 |
| 1425 | 1453 | 1 |
| 1425 | 1479 | 1 |
| 1426 | 1433 | 1 |
| 1426 | 1434 | 1 |
| 1426 | 1435 | 1 |
| 1426 | 1452 | 1 |
| 1426 | 1453 | 1 |
| 1426 | 1479 | 1 |
| 1427 | 1430 | 1 |
| 1427 | 1431 | 1 |
| 1427 | 1432 | 1 |
| 1427 | 1451 | 1 |
| 1428 | 1430 | 1 |
| 1428 | 1431 | 1 |
| 1428 | 1432 | 1 |
| 1428 | 1451 | 1 |
| 1429 | 1436 | 1 |
| 1429 | 1437 | 1 |
| 1429 | 1438 | 1 |
| 1429 | 1451 | 1 |
| 1430 | 1433 | 1 |
| 1430 | 1434 | 1 |

|      |      |   |
|------|------|---|
| 1430 | 1435 | 1 |
| 1431 | 1433 | 1 |
| 1431 | 1434 | 1 |
| 1431 | 1435 | 1 |
| 1432 | 1439 | 1 |
| 1432 | 1440 | 1 |
| 1432 | 1441 | 1 |
| 1433 | 1436 | 1 |
| 1433 | 1437 | 1 |
| 1433 | 1438 | 1 |
| 1434 | 1436 | 1 |
| 1434 | 1437 | 1 |
| 1434 | 1438 | 1 |
| 1435 | 1442 | 1 |
| 1435 | 1443 | 1 |
| 1435 | 1444 | 1 |
| 1436 | 1439 | 1 |
| 1436 | 1440 | 1 |
| 1436 | 1441 | 1 |
| 1437 | 1439 | 1 |
| 1437 | 1440 | 1 |
| 1437 | 1441 | 1 |
| 1438 | 1445 | 1 |
| 1438 | 1446 | 1 |
| 1438 | 1447 | 1 |
| 1439 | 1442 | 1 |
| 1439 | 1443 | 1 |
| 1439 | 1444 | 1 |
| 1440 | 1442 | 1 |
| 1440 | 1443 | 1 |
| 1440 | 1444 | 1 |
| 1441 | 1448 | 1 |
| 1441 | 1449 | 1 |
| 1441 | 1450 | 1 |
| 1442 | 1445 | 1 |
| 1442 | 1446 | 1 |
| 1442 | 1447 | 1 |
| 1443 | 1445 | 1 |
| 1443 | 1446 | 1 |
| 1443 | 1447 | 1 |
| 1445 | 1448 | 1 |
| 1445 | 1449 | 1 |
| 1445 | 1450 | 1 |
| 1446 | 1448 | 1 |
| 1446 | 1449 | 1 |
| 1446 | 1450 | 1 |
| 1451 | 1456 | 1 |
| 1451 | 1457 | 1 |
| 1451 | 1482 | 1 |
| 1451 | 1483 | 1 |
| 1451 | 1485 | 1 |
| 1451 | 1486 | 1 |
| 1451 | 1487 | 1 |
| 1452 | 1454 | 1 |

|      |      |   |
|------|------|---|
| 1452 | 1455 | 1 |
| 1452 | 1480 | 1 |
| 1452 | 1481 | 1 |
| 1452 | 1484 | 1 |
| 1453 | 1458 | 1 |
| 1453 | 1459 | 1 |
| 1453 | 1460 | 1 |
| 1453 | 1480 | 1 |
| 1453 | 1481 | 1 |
| 1453 | 1484 | 1 |
| 1454 | 1456 | 1 |
| 1454 | 1457 | 1 |
| 1454 | 1479 | 1 |
| 1455 | 1461 | 1 |
| 1455 | 1462 | 1 |
| 1455 | 1463 | 1 |
| 1455 | 1479 | 1 |
| 1456 | 1458 | 1 |
| 1456 | 1459 | 1 |
| 1456 | 1460 | 1 |
| 1457 | 1464 | 1 |
| 1457 | 1465 | 1 |
| 1457 | 1466 | 1 |
| 1458 | 1461 | 1 |
| 1458 | 1462 | 1 |
| 1458 | 1463 | 1 |
| 1459 | 1461 | 1 |
| 1459 | 1462 | 1 |
| 1459 | 1463 | 1 |
| 1460 | 1467 | 1 |
| 1460 | 1471 | 1 |
| 1460 | 1475 | 1 |
| 1461 | 1464 | 1 |
| 1461 | 1465 | 1 |
| 1461 | 1466 | 1 |
| 1462 | 1464 | 1 |
| 1462 | 1465 | 1 |
| 1462 | 1466 | 1 |
| 1463 | 1468 | 1 |
| 1463 | 1469 | 1 |
| 1463 | 1470 | 1 |
| 1463 | 1472 | 1 |
| 1463 | 1473 | 1 |
| 1463 | 1474 | 1 |
| 1463 | 1476 | 1 |
| 1463 | 1477 | 1 |
| 1463 | 1478 | 1 |
| 1464 | 1467 | 1 |
| 1464 | 1471 | 1 |
| 1464 | 1475 | 1 |
| 1465 | 1467 | 1 |
| 1465 | 1471 | 1 |
| 1465 | 1475 | 1 |
| 1467 | 1472 | 1 |

|      |      |   |
|------|------|---|
| 1467 | 1473 | 1 |
| 1467 | 1474 | 1 |
| 1467 | 1476 | 1 |
| 1467 | 1477 | 1 |
| 1467 | 1478 | 1 |
| 1468 | 1471 | 1 |
| 1468 | 1475 | 1 |
| 1469 | 1471 | 1 |
| 1469 | 1475 | 1 |
| 1470 | 1471 | 1 |
| 1470 | 1475 | 1 |
| 1471 | 1476 | 1 |
| 1471 | 1477 | 1 |
| 1471 | 1478 | 1 |
| 1472 | 1475 | 1 |
| 1473 | 1475 | 1 |
| 1474 | 1475 | 1 |
| 1479 | 1488 | 1 |
| 1479 | 1489 | 1 |
| 1479 | 1514 | 1 |
| 1480 | 1482 | 1 |
| 1480 | 1483 | 1 |
| 1480 | 1485 | 1 |
| 1480 | 1486 | 1 |
| 1480 | 1487 | 1 |
| 1481 | 1485 | 1 |
| 1481 | 1486 | 1 |
| 1481 | 1487 | 1 |
| 1482 | 1484 | 1 |
| 1483 | 1484 | 1 |
| 1484 | 1490 | 1 |
| 1484 | 1491 | 1 |
| 1484 | 1492 | 1 |
| 1484 | 1515 | 1 |
| 1484 | 1516 | 1 |
| 1484 | 1542 | 1 |
| 1485 | 1488 | 1 |
| 1485 | 1489 | 1 |
| 1485 | 1514 | 1 |
| 1486 | 1488 | 1 |
| 1486 | 1489 | 1 |
| 1486 | 1514 | 1 |
| 1487 | 1493 | 1 |
| 1487 | 1494 | 1 |
| 1487 | 1495 | 1 |
| 1487 | 1517 | 1 |
| 1487 | 1518 | 1 |
| 1487 | 1543 | 1 |
| 1487 | 1544 | 1 |
| 1487 | 1547 | 1 |
| 1488 | 1490 | 1 |
| 1488 | 1491 | 1 |
| 1488 | 1492 | 1 |
| 1488 | 1515 | 1 |



|      |      |   |
|------|------|---|
| 1488 | 1516 | 1 |
| 1488 | 1542 | 1 |
| 1489 | 1496 | 1 |
| 1489 | 1497 | 1 |
| 1489 | 1498 | 1 |
| 1489 | 1515 | 1 |
| 1489 | 1516 | 1 |
| 1489 | 1542 | 1 |
| 1490 | 1493 | 1 |
| 1490 | 1494 | 1 |
| 1490 | 1495 | 1 |
| 1490 | 1514 | 1 |
| 1491 | 1493 | 1 |
| 1491 | 1494 | 1 |
| 1491 | 1495 | 1 |
| 1491 | 1514 | 1 |
| 1492 | 1499 | 1 |
| 1492 | 1500 | 1 |
| 1492 | 1501 | 1 |
| 1492 | 1514 | 1 |
| 1493 | 1496 | 1 |
| 1493 | 1497 | 1 |
| 1493 | 1498 | 1 |
| 1494 | 1496 | 1 |
| 1494 | 1497 | 1 |
| 1494 | 1498 | 1 |
| 1495 | 1502 | 1 |
| 1495 | 1503 | 1 |
| 1495 | 1504 | 1 |
| 1496 | 1499 | 1 |
| 1496 | 1500 | 1 |
| 1496 | 1501 | 1 |
| 1497 | 1499 | 1 |
| 1497 | 1500 | 1 |
| 1497 | 1501 | 1 |
| 1498 | 1505 | 1 |
| 1498 | 1506 | 1 |
| 1498 | 1507 | 1 |
| 1499 | 1502 | 1 |
| 1499 | 1503 | 1 |
| 1499 | 1504 | 1 |
| 1500 | 1502 | 1 |
| 1500 | 1503 | 1 |
| 1500 | 1504 | 1 |
| 1501 | 1508 | 1 |
| 1501 | 1509 | 1 |
| 1501 | 1510 | 1 |
| 1502 | 1505 | 1 |
| 1502 | 1506 | 1 |
| 1502 | 1507 | 1 |
| 1503 | 1505 | 1 |
| 1503 | 1506 | 1 |
| 1503 | 1507 | 1 |
| 1504 | 1511 | 1 |

|      |      |   |
|------|------|---|
| 1504 | 1512 | 1 |
| 1504 | 1513 | 1 |
| 1505 | 1508 | 1 |
| 1505 | 1509 | 1 |
| 1505 | 1510 | 1 |
| 1506 | 1508 | 1 |
| 1506 | 1509 | 1 |
| 1506 | 1510 | 1 |
| 1508 | 1511 | 1 |
| 1508 | 1512 | 1 |
| 1508 | 1513 | 1 |
| 1509 | 1511 | 1 |
| 1509 | 1512 | 1 |
| 1509 | 1513 | 1 |
| 1514 | 1519 | 1 |
| 1514 | 1520 | 1 |
| 1514 | 1545 | 1 |
| 1514 | 1546 | 1 |
| 1514 | 1548 | 1 |
| 1514 | 1549 | 1 |
| 1514 | 1550 | 1 |
| 1515 | 1517 | 1 |
| 1515 | 1518 | 1 |
| 1515 | 1543 | 1 |
| 1515 | 1544 | 1 |
| 1515 | 1547 | 1 |
| 1516 | 1521 | 1 |
| 1516 | 1522 | 1 |
| 1516 | 1523 | 1 |
| 1516 | 1543 | 1 |
| 1516 | 1544 | 1 |
| 1516 | 1547 | 1 |
| 1517 | 1519 | 1 |
| 1517 | 1520 | 1 |
| 1517 | 1542 | 1 |
| 1518 | 1524 | 1 |
| 1518 | 1525 | 1 |
| 1518 | 1526 | 1 |
| 1518 | 1542 | 1 |
| 1519 | 1521 | 1 |
| 1519 | 1522 | 1 |
| 1519 | 1523 | 1 |
| 1520 | 1527 | 1 |
| 1520 | 1528 | 1 |
| 1520 | 1529 | 1 |
| 1521 | 1524 | 1 |
| 1521 | 1525 | 1 |
| 1521 | 1526 | 1 |
| 1522 | 1524 | 1 |
| 1522 | 1525 | 1 |
| 1522 | 1526 | 1 |
| 1523 | 1530 | 1 |
| 1523 | 1534 | 1 |
| 1523 | 1538 | 1 |

|      |      |   |
|------|------|---|
| 1524 | 1527 | 1 |
| 1524 | 1528 | 1 |
| 1524 | 1529 | 1 |
| 1525 | 1527 | 1 |
| 1525 | 1528 | 1 |
| 1525 | 1529 | 1 |
| 1526 | 1531 | 1 |
| 1526 | 1532 | 1 |
| 1526 | 1533 | 1 |
| 1526 | 1535 | 1 |
| 1526 | 1536 | 1 |
| 1526 | 1537 | 1 |
| 1526 | 1539 | 1 |
| 1526 | 1540 | 1 |
| 1526 | 1541 | 1 |
| 1527 | 1530 | 1 |
| 1527 | 1534 | 1 |
| 1527 | 1538 | 1 |
| 1528 | 1530 | 1 |
| 1528 | 1534 | 1 |
| 1528 | 1538 | 1 |
| 1530 | 1535 | 1 |
| 1530 | 1536 | 1 |
| 1530 | 1537 | 1 |
| 1530 | 1539 | 1 |
| 1530 | 1540 | 1 |
| 1530 | 1541 | 1 |
| 1531 | 1534 | 1 |
| 1531 | 1538 | 1 |
| 1532 | 1534 | 1 |
| 1532 | 1538 | 1 |
| 1533 | 1534 | 1 |
| 1533 | 1538 | 1 |
| 1534 | 1539 | 1 |
| 1534 | 1540 | 1 |
| 1534 | 1541 | 1 |
| 1535 | 1538 | 1 |
| 1536 | 1538 | 1 |
| 1537 | 1538 | 1 |
| 1542 | 1551 | 1 |
| 1542 | 1552 | 1 |
| 1542 | 1577 | 1 |
| 1543 | 1545 | 1 |
| 1543 | 1546 | 1 |
| 1543 | 1548 | 1 |
| 1543 | 1549 | 1 |
| 1543 | 1550 | 1 |
| 1544 | 1548 | 1 |
| 1544 | 1549 | 1 |
| 1544 | 1550 | 1 |
| 1545 | 1547 | 1 |
| 1546 | 1547 | 1 |
| 1547 | 1553 | 1 |
| 1547 | 1554 | 1 |

|      |      |   |
|------|------|---|
| 1547 | 1555 | 1 |
| 1547 | 1578 | 1 |
| 1547 | 1579 | 1 |
| 1547 | 1605 | 1 |
| 1548 | 1551 | 1 |
| 1548 | 1552 | 1 |
| 1548 | 1577 | 1 |
| 1549 | 1551 | 1 |
| 1549 | 1552 | 1 |
| 1549 | 1577 | 1 |
| 1550 | 1556 | 1 |
| 1550 | 1557 | 1 |
| 1550 | 1558 | 1 |
| 1550 | 1580 | 1 |
| 1550 | 1581 | 1 |
| 1550 | 1606 | 1 |
| 1550 | 1607 | 1 |
| 1550 | 1610 | 1 |
| 1551 | 1553 | 1 |
| 1551 | 1554 | 1 |
| 1551 | 1555 | 1 |
| 1551 | 1578 | 1 |
| 1551 | 1579 | 1 |
| 1551 | 1605 | 1 |
| 1552 | 1559 | 1 |
| 1552 | 1560 | 1 |
| 1552 | 1561 | 1 |
| 1552 | 1578 | 1 |
| 1552 | 1579 | 1 |
| 1552 | 1605 | 1 |
| 1553 | 1556 | 1 |
| 1553 | 1557 | 1 |
| 1553 | 1558 | 1 |
| 1553 | 1577 | 1 |
| 1554 | 1556 | 1 |
| 1554 | 1557 | 1 |
| 1554 | 1558 | 1 |
| 1554 | 1577 | 1 |
| 1555 | 1562 | 1 |
| 1555 | 1563 | 1 |
| 1555 | 1564 | 1 |
| 1555 | 1577 | 1 |
| 1556 | 1559 | 1 |
| 1556 | 1560 | 1 |
| 1556 | 1561 | 1 |
| 1557 | 1559 | 1 |
| 1557 | 1560 | 1 |
| 1557 | 1561 | 1 |
| 1558 | 1565 | 1 |
| 1558 | 1566 | 1 |
| 1558 | 1567 | 1 |
| 1559 | 1562 | 1 |
| 1559 | 1563 | 1 |
| 1559 | 1564 | 1 |

|      |      |   |
|------|------|---|
| 1560 | 1562 | 1 |
| 1560 | 1563 | 1 |
| 1560 | 1564 | 1 |
| 1561 | 1568 | 1 |
| 1561 | 1569 | 1 |
| 1561 | 1570 | 1 |
| 1562 | 1565 | 1 |
| 1562 | 1566 | 1 |
| 1562 | 1567 | 1 |
| 1563 | 1565 | 1 |
| 1563 | 1566 | 1 |
| 1563 | 1567 | 1 |
| 1564 | 1571 | 1 |
| 1564 | 1572 | 1 |
| 1564 | 1573 | 1 |
| 1565 | 1568 | 1 |
| 1565 | 1569 | 1 |
| 1565 | 1570 | 1 |
| 1566 | 1568 | 1 |
| 1566 | 1569 | 1 |
| 1566 | 1570 | 1 |
| 1567 | 1574 | 1 |
| 1567 | 1575 | 1 |
| 1567 | 1576 | 1 |
| 1568 | 1571 | 1 |
| 1568 | 1572 | 1 |
| 1568 | 1573 | 1 |
| 1569 | 1571 | 1 |
| 1569 | 1572 | 1 |
| 1569 | 1573 | 1 |
| 1571 | 1574 | 1 |
| 1571 | 1575 | 1 |
| 1571 | 1576 | 1 |
| 1572 | 1574 | 1 |
| 1572 | 1575 | 1 |
| 1572 | 1576 | 1 |
| 1577 | 1582 | 1 |
| 1577 | 1583 | 1 |
| 1577 | 1608 | 1 |
| 1577 | 1609 | 1 |
| 1577 | 1611 | 1 |
| 1577 | 1612 | 1 |
| 1577 | 1613 | 1 |
| 1578 | 1580 | 1 |
| 1578 | 1581 | 1 |
| 1578 | 1606 | 1 |
| 1578 | 1607 | 1 |
| 1578 | 1610 | 1 |
| 1579 | 1584 | 1 |
| 1579 | 1585 | 1 |
| 1579 | 1586 | 1 |
| 1579 | 1606 | 1 |
| 1579 | 1607 | 1 |
| 1579 | 1610 | 1 |

|      |      |   |
|------|------|---|
| 1580 | 1582 | 1 |
| 1580 | 1583 | 1 |
| 1580 | 1605 | 1 |
| 1581 | 1587 | 1 |
| 1581 | 1588 | 1 |
| 1581 | 1589 | 1 |
| 1581 | 1605 | 1 |
| 1582 | 1584 | 1 |
| 1582 | 1585 | 1 |
| 1582 | 1586 | 1 |
| 1583 | 1590 | 1 |
| 1583 | 1591 | 1 |
| 1583 | 1592 | 1 |
| 1584 | 1587 | 1 |
| 1584 | 1588 | 1 |
| 1584 | 1589 | 1 |
| 1585 | 1587 | 1 |
| 1585 | 1588 | 1 |
| 1585 | 1589 | 1 |
| 1586 | 1593 | 1 |
| 1586 | 1597 | 1 |
| 1586 | 1601 | 1 |
| 1587 | 1590 | 1 |
| 1587 | 1591 | 1 |
| 1587 | 1592 | 1 |
| 1588 | 1590 | 1 |
| 1588 | 1591 | 1 |
| 1588 | 1592 | 1 |
| 1589 | 1594 | 1 |
| 1589 | 1595 | 1 |
| 1589 | 1596 | 1 |
| 1589 | 1598 | 1 |
| 1589 | 1599 | 1 |
| 1589 | 1600 | 1 |
| 1589 | 1602 | 1 |
| 1589 | 1603 | 1 |
| 1589 | 1604 | 1 |
| 1590 | 1593 | 1 |
| 1590 | 1597 | 1 |
| 1590 | 1601 | 1 |
| 1591 | 1593 | 1 |
| 1591 | 1597 | 1 |
| 1591 | 1601 | 1 |
| 1593 | 1598 | 1 |
| 1593 | 1599 | 1 |
| 1593 | 1600 | 1 |
| 1593 | 1602 | 1 |
| 1593 | 1603 | 1 |
| 1593 | 1604 | 1 |
| 1594 | 1597 | 1 |
| 1594 | 1601 | 1 |
| 1595 | 1597 | 1 |
| 1595 | 1601 | 1 |
| 1596 | 1597 | 1 |

|      |      |   |
|------|------|---|
| 1596 | 1601 | 1 |
| 1597 | 1602 | 1 |
| 1597 | 1603 | 1 |
| 1597 | 1604 | 1 |
| 1598 | 1601 | 1 |
| 1599 | 1601 | 1 |
| 1600 | 1601 | 1 |
| 1605 | 1614 | 1 |
| 1605 | 1615 | 1 |
| 1605 | 1640 | 1 |
| 1606 | 1608 | 1 |
| 1606 | 1609 | 1 |
| 1606 | 1611 | 1 |
| 1606 | 1612 | 1 |
| 1606 | 1613 | 1 |
| 1607 | 1611 | 1 |
| 1607 | 1612 | 1 |
| 1607 | 1613 | 1 |
| 1608 | 1610 | 1 |
| 1609 | 1610 | 1 |
| 1610 | 1616 | 1 |
| 1610 | 1617 | 1 |
| 1610 | 1618 | 1 |
| 1610 | 1641 | 1 |
| 1610 | 1642 | 1 |
| 1610 | 1668 | 1 |
| 1611 | 1614 | 1 |
| 1611 | 1615 | 1 |
| 1611 | 1640 | 1 |
| 1612 | 1614 | 1 |
| 1612 | 1615 | 1 |
| 1612 | 1640 | 1 |
| 1613 | 1619 | 1 |
| 1613 | 1620 | 1 |
| 1613 | 1621 | 1 |
| 1613 | 1643 | 1 |
| 1613 | 1644 | 1 |
| 1613 | 1669 | 1 |
| 1613 | 1670 | 1 |
| 1613 | 1673 | 1 |
| 1614 | 1616 | 1 |
| 1614 | 1617 | 1 |
| 1614 | 1618 | 1 |
| 1614 | 1641 | 1 |
| 1614 | 1642 | 1 |
| 1614 | 1668 | 1 |
| 1615 | 1622 | 1 |
| 1615 | 1623 | 1 |
| 1615 | 1624 | 1 |
| 1615 | 1641 | 1 |
| 1615 | 1642 | 1 |
| 1615 | 1668 | 1 |
| 1616 | 1619 | 1 |
| 1616 | 1620 | 1 |

|      |      |   |
|------|------|---|
| 1616 | 1621 | 1 |
| 1616 | 1640 | 1 |
| 1617 | 1619 | 1 |
| 1617 | 1620 | 1 |
| 1617 | 1621 | 1 |
| 1617 | 1640 | 1 |
| 1618 | 1625 | 1 |
| 1618 | 1626 | 1 |
| 1618 | 1627 | 1 |
| 1618 | 1640 | 1 |
| 1619 | 1622 | 1 |
| 1619 | 1623 | 1 |
| 1619 | 1624 | 1 |
| 1620 | 1622 | 1 |
| 1620 | 1623 | 1 |
| 1620 | 1624 | 1 |
| 1621 | 1628 | 1 |
| 1621 | 1629 | 1 |
| 1621 | 1630 | 1 |
| 1622 | 1625 | 1 |
| 1622 | 1626 | 1 |
| 1622 | 1627 | 1 |
| 1623 | 1625 | 1 |
| 1623 | 1626 | 1 |
| 1623 | 1627 | 1 |
| 1624 | 1631 | 1 |
| 1624 | 1632 | 1 |
| 1624 | 1633 | 1 |
| 1625 | 1628 | 1 |
| 1625 | 1629 | 1 |
| 1625 | 1630 | 1 |
| 1626 | 1628 | 1 |
| 1626 | 1629 | 1 |
| 1626 | 1630 | 1 |
| 1627 | 1634 | 1 |
| 1627 | 1635 | 1 |
| 1627 | 1636 | 1 |
| 1628 | 1631 | 1 |
| 1628 | 1632 | 1 |
| 1628 | 1633 | 1 |
| 1629 | 1631 | 1 |
| 1629 | 1632 | 1 |
| 1629 | 1633 | 1 |
| 1630 | 1637 | 1 |
| 1630 | 1638 | 1 |
| 1630 | 1639 | 1 |
| 1631 | 1634 | 1 |
| 1631 | 1635 | 1 |
| 1631 | 1636 | 1 |
| 1632 | 1634 | 1 |
| 1632 | 1635 | 1 |
| 1632 | 1636 | 1 |
| 1634 | 1637 | 1 |
| 1634 | 1638 | 1 |



|      |      |   |
|------|------|---|
| 1634 | 1639 | 1 |
| 1635 | 1637 | 1 |
| 1635 | 1638 | 1 |
| 1635 | 1639 | 1 |
| 1640 | 1645 | 1 |
| 1640 | 1646 | 1 |
| 1640 | 1671 | 1 |
| 1640 | 1672 | 1 |
| 1640 | 1674 | 1 |
| 1640 | 1675 | 1 |
| 1640 | 1676 | 1 |
| 1641 | 1643 | 1 |
| 1641 | 1644 | 1 |
| 1641 | 1669 | 1 |
| 1641 | 1670 | 1 |
| 1641 | 1673 | 1 |
| 1642 | 1647 | 1 |
| 1642 | 1648 | 1 |
| 1642 | 1649 | 1 |
| 1642 | 1669 | 1 |
| 1642 | 1670 | 1 |
| 1642 | 1673 | 1 |
| 1643 | 1645 | 1 |
| 1643 | 1646 | 1 |
| 1643 | 1668 | 1 |
| 1644 | 1650 | 1 |
| 1644 | 1651 | 1 |
| 1644 | 1652 | 1 |
| 1644 | 1668 | 1 |
| 1645 | 1647 | 1 |
| 1645 | 1648 | 1 |
| 1645 | 1649 | 1 |
| 1646 | 1653 | 1 |
| 1646 | 1654 | 1 |
| 1646 | 1655 | 1 |
| 1647 | 1650 | 1 |
| 1647 | 1651 | 1 |
| 1647 | 1652 | 1 |
| 1648 | 1650 | 1 |
| 1648 | 1651 | 1 |
| 1648 | 1652 | 1 |
| 1649 | 1656 | 1 |
| 1649 | 1660 | 1 |
| 1649 | 1664 | 1 |
| 1650 | 1653 | 1 |
| 1650 | 1654 | 1 |
| 1650 | 1655 | 1 |
| 1651 | 1653 | 1 |
| 1651 | 1654 | 1 |
| 1651 | 1655 | 1 |
| 1652 | 1657 | 1 |
| 1652 | 1658 | 1 |
| 1652 | 1659 | 1 |
| 1652 | 1661 | 1 |

|      |      |   |
|------|------|---|
| 1652 | 1662 | 1 |
| 1652 | 1663 | 1 |
| 1652 | 1665 | 1 |
| 1652 | 1666 | 1 |
| 1652 | 1667 | 1 |
| 1653 | 1656 | 1 |
| 1653 | 1660 | 1 |
| 1653 | 1664 | 1 |
| 1654 | 1656 | 1 |
| 1654 | 1660 | 1 |
| 1654 | 1664 | 1 |
| 1656 | 1661 | 1 |
| 1656 | 1662 | 1 |
| 1656 | 1663 | 1 |
| 1656 | 1665 | 1 |
| 1656 | 1666 | 1 |
| 1656 | 1667 | 1 |
| 1657 | 1660 | 1 |
| 1657 | 1664 | 1 |
| 1658 | 1660 | 1 |
| 1658 | 1664 | 1 |
| 1659 | 1660 | 1 |
| 1659 | 1664 | 1 |
| 1660 | 1665 | 1 |
| 1660 | 1666 | 1 |
| 1660 | 1667 | 1 |
| 1661 | 1664 | 1 |
| 1662 | 1664 | 1 |
| 1663 | 1664 | 1 |
| 1668 | 1677 | 1 |
| 1668 | 1678 | 1 |
| 1668 | 1703 | 1 |
| 1669 | 1671 | 1 |
| 1669 | 1672 | 1 |
| 1669 | 1674 | 1 |
| 1669 | 1675 | 1 |
| 1669 | 1676 | 1 |
| 1670 | 1674 | 1 |
| 1670 | 1675 | 1 |
| 1670 | 1676 | 1 |
| 1671 | 1673 | 1 |
| 1672 | 1673 | 1 |
| 1673 | 1679 | 1 |
| 1673 | 1680 | 1 |
| 1673 | 1681 | 1 |
| 1673 | 1704 | 1 |
| 1673 | 1705 | 1 |
| 1673 | 1731 | 1 |
| 1674 | 1677 | 1 |
| 1674 | 1678 | 1 |
| 1674 | 1703 | 1 |
| 1675 | 1677 | 1 |
| 1675 | 1678 | 1 |
| 1675 | 1703 | 1 |

|      |      |   |
|------|------|---|
| 1676 | 1682 | 1 |
| 1676 | 1683 | 1 |
| 1676 | 1684 | 1 |
| 1676 | 1706 | 1 |
| 1676 | 1707 | 1 |
| 1676 | 1732 | 1 |
| 1676 | 1733 | 1 |
| 1676 | 1736 | 1 |
| 1677 | 1679 | 1 |
| 1677 | 1680 | 1 |
| 1677 | 1681 | 1 |
| 1677 | 1704 | 1 |
| 1677 | 1705 | 1 |
| 1677 | 1731 | 1 |
| 1678 | 1685 | 1 |
| 1678 | 1686 | 1 |
| 1678 | 1687 | 1 |
| 1678 | 1704 | 1 |
| 1678 | 1705 | 1 |
| 1678 | 1731 | 1 |
| 1679 | 1682 | 1 |
| 1679 | 1683 | 1 |
| 1679 | 1684 | 1 |
| 1679 | 1703 | 1 |
| 1680 | 1682 | 1 |
| 1680 | 1683 | 1 |
| 1680 | 1684 | 1 |
| 1680 | 1703 | 1 |
| 1681 | 1688 | 1 |
| 1681 | 1689 | 1 |
| 1681 | 1690 | 1 |
| 1681 | 1703 | 1 |
| 1682 | 1685 | 1 |
| 1682 | 1686 | 1 |
| 1682 | 1687 | 1 |
| 1683 | 1685 | 1 |
| 1683 | 1686 | 1 |
| 1683 | 1687 | 1 |
| 1684 | 1691 | 1 |
| 1684 | 1692 | 1 |
| 1684 | 1693 | 1 |
| 1685 | 1688 | 1 |
| 1685 | 1689 | 1 |
| 1685 | 1690 | 1 |
| 1686 | 1688 | 1 |
| 1686 | 1689 | 1 |
| 1686 | 1690 | 1 |
| 1687 | 1694 | 1 |
| 1687 | 1695 | 1 |
| 1687 | 1696 | 1 |
| 1688 | 1691 | 1 |
| 1688 | 1692 | 1 |
| 1688 | 1693 | 1 |
| 1689 | 1691 | 1 |

|      |      |   |
|------|------|---|
| 1689 | 1692 | 1 |
| 1689 | 1693 | 1 |
| 1690 | 1697 | 1 |
| 1690 | 1698 | 1 |
| 1690 | 1699 | 1 |
| 1691 | 1694 | 1 |
| 1691 | 1695 | 1 |
| 1691 | 1696 | 1 |
| 1692 | 1694 | 1 |
| 1692 | 1695 | 1 |
| 1692 | 1696 | 1 |
| 1693 | 1700 | 1 |
| 1693 | 1701 | 1 |
| 1693 | 1702 | 1 |
| 1694 | 1697 | 1 |
| 1694 | 1698 | 1 |
| 1694 | 1699 | 1 |
| 1695 | 1697 | 1 |
| 1695 | 1698 | 1 |
| 1695 | 1699 | 1 |
| 1697 | 1700 | 1 |
| 1697 | 1701 | 1 |
| 1697 | 1702 | 1 |
| 1698 | 1700 | 1 |
| 1698 | 1701 | 1 |
| 1698 | 1702 | 1 |
| 1703 | 1708 | 1 |
| 1703 | 1709 | 1 |
| 1703 | 1734 | 1 |
| 1703 | 1735 | 1 |
| 1703 | 1737 | 1 |
| 1703 | 1738 | 1 |
| 1703 | 1739 | 1 |
| 1704 | 1706 | 1 |
| 1704 | 1707 | 1 |
| 1704 | 1732 | 1 |
| 1704 | 1733 | 1 |
| 1704 | 1736 | 1 |
| 1705 | 1710 | 1 |
| 1705 | 1711 | 1 |
| 1705 | 1712 | 1 |
| 1705 | 1732 | 1 |
| 1705 | 1733 | 1 |
| 1705 | 1736 | 1 |
| 1706 | 1708 | 1 |
| 1706 | 1709 | 1 |
| 1706 | 1731 | 1 |
| 1707 | 1713 | 1 |
| 1707 | 1714 | 1 |
| 1707 | 1715 | 1 |
| 1707 | 1731 | 1 |
| 1708 | 1710 | 1 |
| 1708 | 1711 | 1 |
| 1708 | 1712 | 1 |

|      |      |   |
|------|------|---|
| 1709 | 1716 | 1 |
| 1709 | 1717 | 1 |
| 1709 | 1718 | 1 |
| 1710 | 1713 | 1 |
| 1710 | 1714 | 1 |
| 1710 | 1715 | 1 |
| 1711 | 1713 | 1 |
| 1711 | 1714 | 1 |
| 1711 | 1715 | 1 |
| 1712 | 1719 | 1 |
| 1712 | 1723 | 1 |
| 1712 | 1727 | 1 |
| 1713 | 1716 | 1 |
| 1713 | 1717 | 1 |
| 1713 | 1718 | 1 |
| 1714 | 1716 | 1 |
| 1714 | 1717 | 1 |
| 1714 | 1718 | 1 |
| 1715 | 1720 | 1 |
| 1715 | 1721 | 1 |
| 1715 | 1722 | 1 |
| 1715 | 1724 | 1 |
| 1715 | 1725 | 1 |
| 1715 | 1726 | 1 |
| 1715 | 1728 | 1 |
| 1715 | 1729 | 1 |
| 1715 | 1730 | 1 |
| 1716 | 1719 | 1 |
| 1716 | 1723 | 1 |
| 1716 | 1727 | 1 |
| 1717 | 1719 | 1 |
| 1717 | 1723 | 1 |
| 1717 | 1727 | 1 |
| 1719 | 1724 | 1 |
| 1719 | 1725 | 1 |
| 1719 | 1726 | 1 |
| 1719 | 1728 | 1 |
| 1719 | 1729 | 1 |
| 1719 | 1730 | 1 |
| 1720 | 1723 | 1 |
| 1720 | 1727 | 1 |
| 1721 | 1723 | 1 |
| 1721 | 1727 | 1 |
| 1722 | 1723 | 1 |
| 1722 | 1727 | 1 |
| 1723 | 1728 | 1 |
| 1723 | 1729 | 1 |
| 1723 | 1730 | 1 |
| 1724 | 1727 | 1 |
| 1725 | 1727 | 1 |
| 1726 | 1727 | 1 |
| 1731 | 1740 | 1 |
| 1731 | 1741 | 1 |
| 1731 | 1766 | 1 |

|      |      |   |
|------|------|---|
| 1732 | 1734 | 1 |
| 1732 | 1735 | 1 |
| 1732 | 1737 | 1 |
| 1732 | 1738 | 1 |
| 1732 | 1739 | 1 |
| 1733 | 1737 | 1 |
| 1733 | 1738 | 1 |
| 1733 | 1739 | 1 |
| 1734 | 1736 | 1 |
| 1735 | 1736 | 1 |
| 1736 | 1742 | 1 |
| 1736 | 1743 | 1 |
| 1736 | 1744 | 1 |
| 1736 | 1767 | 1 |
| 1736 | 1768 | 1 |
| 1736 | 1794 | 1 |
| 1737 | 1740 | 1 |
| 1737 | 1741 | 1 |
| 1737 | 1766 | 1 |
| 1738 | 1740 | 1 |
| 1738 | 1741 | 1 |
| 1738 | 1766 | 1 |
| 1739 | 1745 | 1 |
| 1739 | 1746 | 1 |
| 1739 | 1747 | 1 |
| 1739 | 1769 | 1 |
| 1739 | 1770 | 1 |
| 1739 | 1795 | 1 |
| 1739 | 1796 | 1 |
| 1739 | 1799 | 1 |
| 1740 | 1742 | 1 |
| 1740 | 1743 | 1 |
| 1740 | 1744 | 1 |
| 1740 | 1767 | 1 |
| 1740 | 1768 | 1 |
| 1740 | 1794 | 1 |
| 1741 | 1748 | 1 |
| 1741 | 1749 | 1 |
| 1741 | 1750 | 1 |
| 1741 | 1767 | 1 |
| 1741 | 1768 | 1 |
| 1741 | 1794 | 1 |
| 1742 | 1745 | 1 |
| 1742 | 1746 | 1 |
| 1742 | 1747 | 1 |
| 1742 | 1766 | 1 |
| 1743 | 1745 | 1 |
| 1743 | 1746 | 1 |
| 1743 | 1747 | 1 |
| 1743 | 1766 | 1 |
| 1744 | 1751 | 1 |
| 1744 | 1752 | 1 |
| 1744 | 1753 | 1 |
| 1744 | 1766 | 1 |

|      |      |   |
|------|------|---|
| 1745 | 1748 | 1 |
| 1745 | 1749 | 1 |
| 1745 | 1750 | 1 |
| 1746 | 1748 | 1 |
| 1746 | 1749 | 1 |
| 1746 | 1750 | 1 |
| 1747 | 1754 | 1 |
| 1747 | 1755 | 1 |
| 1747 | 1756 | 1 |
| 1748 | 1751 | 1 |
| 1748 | 1752 | 1 |
| 1748 | 1753 | 1 |
| 1749 | 1751 | 1 |
| 1749 | 1752 | 1 |
| 1749 | 1753 | 1 |
| 1750 | 1757 | 1 |
| 1750 | 1758 | 1 |
| 1750 | 1759 | 1 |
| 1751 | 1754 | 1 |
| 1751 | 1755 | 1 |
| 1751 | 1756 | 1 |
| 1752 | 1754 | 1 |
| 1752 | 1755 | 1 |
| 1752 | 1756 | 1 |
| 1753 | 1760 | 1 |
| 1753 | 1761 | 1 |
| 1753 | 1762 | 1 |
| 1754 | 1757 | 1 |
| 1754 | 1758 | 1 |
| 1754 | 1759 | 1 |
| 1755 | 1757 | 1 |
| 1755 | 1758 | 1 |
| 1755 | 1759 | 1 |
| 1756 | 1763 | 1 |
| 1756 | 1764 | 1 |
| 1756 | 1765 | 1 |
| 1757 | 1760 | 1 |
| 1757 | 1761 | 1 |
| 1757 | 1762 | 1 |
| 1758 | 1760 | 1 |
| 1758 | 1761 | 1 |
| 1758 | 1762 | 1 |
| 1760 | 1763 | 1 |
| 1760 | 1764 | 1 |
| 1760 | 1765 | 1 |
| 1761 | 1763 | 1 |
| 1761 | 1764 | 1 |
| 1761 | 1765 | 1 |
| 1766 | 1771 | 1 |
| 1766 | 1772 | 1 |
| 1766 | 1797 | 1 |
| 1766 | 1798 | 1 |
| 1766 | 1800 | 1 |
| 1766 | 1801 | 1 |

|      |      |   |
|------|------|---|
| 1766 | 1802 | 1 |
| 1767 | 1769 | 1 |
| 1767 | 1770 | 1 |
| 1767 | 1795 | 1 |
| 1767 | 1796 | 1 |
| 1767 | 1799 | 1 |
| 1768 | 1773 | 1 |
| 1768 | 1774 | 1 |
| 1768 | 1775 | 1 |
| 1768 | 1795 | 1 |
| 1768 | 1796 | 1 |
| 1768 | 1799 | 1 |
| 1769 | 1771 | 1 |
| 1769 | 1772 | 1 |
| 1769 | 1794 | 1 |
| 1770 | 1776 | 1 |
| 1770 | 1777 | 1 |
| 1770 | 1778 | 1 |
| 1770 | 1794 | 1 |
| 1771 | 1773 | 1 |
| 1771 | 1774 | 1 |
| 1771 | 1775 | 1 |
| 1772 | 1779 | 1 |
| 1772 | 1780 | 1 |
| 1772 | 1781 | 1 |
| 1773 | 1776 | 1 |
| 1773 | 1777 | 1 |
| 1773 | 1778 | 1 |
| 1774 | 1776 | 1 |
| 1774 | 1777 | 1 |
| 1774 | 1778 | 1 |
| 1775 | 1782 | 1 |
| 1775 | 1786 | 1 |
| 1775 | 1790 | 1 |
| 1776 | 1779 | 1 |
| 1776 | 1780 | 1 |
| 1776 | 1781 | 1 |
| 1777 | 1779 | 1 |
| 1777 | 1780 | 1 |
| 1777 | 1781 | 1 |
| 1778 | 1783 | 1 |
| 1778 | 1784 | 1 |
| 1778 | 1785 | 1 |
| 1778 | 1787 | 1 |
| 1778 | 1788 | 1 |
| 1778 | 1789 | 1 |
| 1778 | 1791 | 1 |
| 1778 | 1792 | 1 |
| 1778 | 1793 | 1 |
| 1779 | 1782 | 1 |
| 1779 | 1786 | 1 |
| 1779 | 1790 | 1 |
| 1780 | 1782 | 1 |
| 1780 | 1786 | 1 |



|      |      |   |
|------|------|---|
| 1780 | 1790 | 1 |
| 1782 | 1787 | 1 |
| 1782 | 1788 | 1 |
| 1782 | 1789 | 1 |
| 1782 | 1791 | 1 |
| 1782 | 1792 | 1 |
| 1782 | 1793 | 1 |
| 1783 | 1786 | 1 |
| 1783 | 1790 | 1 |
| 1784 | 1786 | 1 |
| 1784 | 1790 | 1 |
| 1785 | 1786 | 1 |
| 1785 | 1790 | 1 |
| 1786 | 1791 | 1 |
| 1786 | 1792 | 1 |
| 1786 | 1793 | 1 |
| 1787 | 1790 | 1 |
| 1788 | 1790 | 1 |
| 1789 | 1790 | 1 |
| 1794 | 1803 | 1 |
| 1794 | 1804 | 1 |
| 1794 | 1829 | 1 |
| 1795 | 1797 | 1 |
| 1795 | 1798 | 1 |
| 1795 | 1800 | 1 |
| 1795 | 1801 | 1 |
| 1795 | 1802 | 1 |
| 1796 | 1800 | 1 |
| 1796 | 1801 | 1 |
| 1796 | 1802 | 1 |
| 1797 | 1799 | 1 |
| 1798 | 1799 | 1 |
| 1799 | 1805 | 1 |
| 1799 | 1806 | 1 |
| 1799 | 1807 | 1 |
| 1799 | 1830 | 1 |
| 1799 | 1831 | 1 |
| 1799 | 1857 | 1 |
| 1800 | 1803 | 1 |
| 1800 | 1804 | 1 |
| 1800 | 1829 | 1 |
| 1801 | 1803 | 1 |
| 1801 | 1804 | 1 |
| 1801 | 1829 | 1 |
| 1802 | 1808 | 1 |
| 1802 | 1809 | 1 |
| 1802 | 1810 | 1 |
| 1802 | 1832 | 1 |
| 1802 | 1833 | 1 |
| 1802 | 1858 | 1 |
| 1802 | 1859 | 1 |
| 1802 | 1862 | 1 |
| 1803 | 1805 | 1 |
| 1803 | 1806 | 1 |

|      |      |   |
|------|------|---|
| 1803 | 1807 | 1 |
| 1803 | 1830 | 1 |
| 1803 | 1831 | 1 |
| 1803 | 1857 | 1 |
| 1804 | 1811 | 1 |
| 1804 | 1812 | 1 |
| 1804 | 1813 | 1 |
| 1804 | 1830 | 1 |
| 1804 | 1831 | 1 |
| 1804 | 1857 | 1 |
| 1805 | 1808 | 1 |
| 1805 | 1809 | 1 |
| 1805 | 1810 | 1 |
| 1805 | 1829 | 1 |
| 1806 | 1808 | 1 |
| 1806 | 1809 | 1 |
| 1806 | 1810 | 1 |
| 1806 | 1829 | 1 |
| 1807 | 1814 | 1 |
| 1807 | 1815 | 1 |
| 1807 | 1816 | 1 |
| 1807 | 1829 | 1 |
| 1808 | 1811 | 1 |
| 1808 | 1812 | 1 |
| 1808 | 1813 | 1 |
| 1809 | 1811 | 1 |
| 1809 | 1812 | 1 |
| 1809 | 1813 | 1 |
| 1810 | 1817 | 1 |
| 1810 | 1818 | 1 |
| 1810 | 1819 | 1 |
| 1811 | 1814 | 1 |
| 1811 | 1815 | 1 |
| 1811 | 1816 | 1 |
| 1812 | 1814 | 1 |
| 1812 | 1815 | 1 |
| 1812 | 1816 | 1 |
| 1813 | 1820 | 1 |
| 1813 | 1821 | 1 |
| 1813 | 1822 | 1 |
| 1814 | 1817 | 1 |
| 1814 | 1818 | 1 |
| 1814 | 1819 | 1 |
| 1815 | 1817 | 1 |
| 1815 | 1818 | 1 |
| 1815 | 1819 | 1 |
| 1816 | 1823 | 1 |
| 1816 | 1824 | 1 |
| 1816 | 1825 | 1 |
| 1817 | 1820 | 1 |
| 1817 | 1821 | 1 |
| 1817 | 1822 | 1 |
| 1818 | 1820 | 1 |
| 1818 | 1821 | 1 |

|      |      |   |
|------|------|---|
| 1818 | 1822 | 1 |
| 1819 | 1826 | 1 |
| 1819 | 1827 | 1 |
| 1819 | 1828 | 1 |
| 1820 | 1823 | 1 |
| 1820 | 1824 | 1 |
| 1820 | 1825 | 1 |
| 1821 | 1823 | 1 |
| 1821 | 1824 | 1 |
| 1821 | 1825 | 1 |
| 1823 | 1826 | 1 |
| 1823 | 1827 | 1 |
| 1823 | 1828 | 1 |
| 1824 | 1826 | 1 |
| 1824 | 1827 | 1 |
| 1824 | 1828 | 1 |
| 1829 | 1834 | 1 |
| 1829 | 1835 | 1 |
| 1829 | 1860 | 1 |
| 1829 | 1861 | 1 |
| 1829 | 1863 | 1 |
| 1829 | 1864 | 1 |
| 1829 | 1865 | 1 |
| 1830 | 1832 | 1 |
| 1830 | 1833 | 1 |
| 1830 | 1858 | 1 |
| 1830 | 1859 | 1 |
| 1830 | 1862 | 1 |
| 1831 | 1836 | 1 |
| 1831 | 1837 | 1 |
| 1831 | 1838 | 1 |
| 1831 | 1858 | 1 |
| 1831 | 1859 | 1 |
| 1831 | 1862 | 1 |
| 1832 | 1834 | 1 |
| 1832 | 1835 | 1 |
| 1832 | 1857 | 1 |
| 1833 | 1839 | 1 |
| 1833 | 1840 | 1 |
| 1833 | 1841 | 1 |
| 1833 | 1857 | 1 |
| 1834 | 1836 | 1 |
| 1834 | 1837 | 1 |
| 1834 | 1838 | 1 |
| 1835 | 1842 | 1 |
| 1835 | 1843 | 1 |
| 1835 | 1844 | 1 |
| 1836 | 1839 | 1 |
| 1836 | 1840 | 1 |
| 1836 | 1841 | 1 |
| 1837 | 1839 | 1 |
| 1837 | 1840 | 1 |
| 1837 | 1841 | 1 |
| 1838 | 1845 | 1 |

|      |      |   |
|------|------|---|
| 1838 | 1849 | 1 |
| 1838 | 1853 | 1 |
| 1839 | 1842 | 1 |
| 1839 | 1843 | 1 |
| 1839 | 1844 | 1 |
| 1840 | 1842 | 1 |
| 1840 | 1843 | 1 |
| 1840 | 1844 | 1 |
| 1841 | 1846 | 1 |
| 1841 | 1847 | 1 |
| 1841 | 1848 | 1 |
| 1841 | 1850 | 1 |
| 1841 | 1851 | 1 |
| 1841 | 1852 | 1 |
| 1841 | 1854 | 1 |
| 1841 | 1855 | 1 |
| 1841 | 1856 | 1 |
| 1842 | 1845 | 1 |
| 1842 | 1849 | 1 |
| 1842 | 1853 | 1 |
| 1843 | 1845 | 1 |
| 1843 | 1849 | 1 |
| 1843 | 1853 | 1 |
| 1845 | 1850 | 1 |
| 1845 | 1851 | 1 |
| 1845 | 1852 | 1 |
| 1845 | 1854 | 1 |
| 1845 | 1855 | 1 |
| 1845 | 1856 | 1 |
| 1846 | 1849 | 1 |
| 1846 | 1853 | 1 |
| 1847 | 1849 | 1 |
| 1847 | 1853 | 1 |
| 1848 | 1849 | 1 |
| 1848 | 1853 | 1 |
| 1849 | 1854 | 1 |
| 1849 | 1855 | 1 |
| 1849 | 1856 | 1 |
| 1850 | 1853 | 1 |
| 1851 | 1853 | 1 |
| 1852 | 1853 | 1 |
| 1857 | 1866 | 1 |
| 1857 | 1867 | 1 |
| 1857 | 1892 | 1 |
| 1858 | 1860 | 1 |
| 1858 | 1861 | 1 |
| 1858 | 1863 | 1 |
| 1858 | 1864 | 1 |
| 1858 | 1865 | 1 |
| 1859 | 1863 | 1 |
| 1859 | 1864 | 1 |
| 1859 | 1865 | 1 |
| 1860 | 1862 | 1 |
| 1861 | 1862 | 1 |

|      |      |   |
|------|------|---|
| 1862 | 1868 | 1 |
| 1862 | 1869 | 1 |
| 1862 | 1870 | 1 |
| 1862 | 1893 | 1 |
| 1862 | 1894 | 1 |
| 1862 | 1920 | 1 |
| 1863 | 1866 | 1 |
| 1863 | 1867 | 1 |
| 1863 | 1892 | 1 |
| 1864 | 1866 | 1 |
| 1864 | 1867 | 1 |
| 1864 | 1892 | 1 |
| 1865 | 1871 | 1 |
| 1865 | 1872 | 1 |
| 1865 | 1873 | 1 |
| 1865 | 1895 | 1 |
| 1865 | 1896 | 1 |
| 1865 | 1921 | 1 |
| 1865 | 1922 | 1 |
| 1865 | 1925 | 1 |
| 1866 | 1868 | 1 |
| 1866 | 1869 | 1 |
| 1866 | 1870 | 1 |
| 1866 | 1893 | 1 |
| 1866 | 1894 | 1 |
| 1866 | 1920 | 1 |
| 1867 | 1874 | 1 |
| 1867 | 1875 | 1 |
| 1867 | 1876 | 1 |
| 1867 | 1893 | 1 |
| 1867 | 1894 | 1 |
| 1867 | 1920 | 1 |
| 1868 | 1871 | 1 |
| 1868 | 1872 | 1 |
| 1868 | 1873 | 1 |
| 1868 | 1892 | 1 |
| 1869 | 1871 | 1 |
| 1869 | 1872 | 1 |
| 1869 | 1873 | 1 |
| 1869 | 1892 | 1 |
| 1870 | 1877 | 1 |
| 1870 | 1878 | 1 |
| 1870 | 1879 | 1 |
| 1870 | 1892 | 1 |
| 1871 | 1874 | 1 |
| 1871 | 1875 | 1 |
| 1871 | 1876 | 1 |
| 1872 | 1874 | 1 |
| 1872 | 1875 | 1 |
| 1872 | 1876 | 1 |
| 1873 | 1880 | 1 |
| 1873 | 1881 | 1 |
| 1873 | 1882 | 1 |
| 1874 | 1877 | 1 |

|      |      |   |
|------|------|---|
| 1874 | 1878 | 1 |
| 1874 | 1879 | 1 |
| 1875 | 1877 | 1 |
| 1875 | 1878 | 1 |
| 1875 | 1879 | 1 |
| 1876 | 1883 | 1 |
| 1876 | 1884 | 1 |
| 1876 | 1885 | 1 |
| 1877 | 1880 | 1 |
| 1877 | 1881 | 1 |
| 1877 | 1882 | 1 |
| 1878 | 1880 | 1 |
| 1878 | 1881 | 1 |
| 1878 | 1882 | 1 |
| 1879 | 1886 | 1 |
| 1879 | 1887 | 1 |
| 1879 | 1888 | 1 |
| 1880 | 1883 | 1 |
| 1880 | 1884 | 1 |
| 1880 | 1885 | 1 |
| 1881 | 1883 | 1 |
| 1881 | 1884 | 1 |
| 1881 | 1885 | 1 |
| 1882 | 1889 | 1 |
| 1882 | 1890 | 1 |
| 1882 | 1891 | 1 |
| 1883 | 1886 | 1 |
| 1883 | 1887 | 1 |
| 1883 | 1888 | 1 |
| 1884 | 1886 | 1 |
| 1884 | 1887 | 1 |
| 1884 | 1888 | 1 |
| 1886 | 1889 | 1 |
| 1886 | 1890 | 1 |
| 1886 | 1891 | 1 |
| 1887 | 1889 | 1 |
| 1887 | 1890 | 1 |
| 1887 | 1891 | 1 |
| 1892 | 1897 | 1 |
| 1892 | 1898 | 1 |
| 1892 | 1923 | 1 |
| 1892 | 1924 | 1 |
| 1892 | 1926 | 1 |
| 1892 | 1927 | 1 |
| 1892 | 1928 | 1 |
| 1893 | 1895 | 1 |
| 1893 | 1896 | 1 |
| 1893 | 1921 | 1 |
| 1893 | 1922 | 1 |
| 1893 | 1925 | 1 |
| 1894 | 1899 | 1 |
| 1894 | 1900 | 1 |
| 1894 | 1901 | 1 |
| 1894 | 1921 | 1 |

|      |      |   |
|------|------|---|
| 1894 | 1922 | 1 |
| 1894 | 1925 | 1 |
| 1895 | 1897 | 1 |
| 1895 | 1898 | 1 |
| 1895 | 1920 | 1 |
| 1896 | 1902 | 1 |
| 1896 | 1903 | 1 |
| 1896 | 1904 | 1 |
| 1896 | 1920 | 1 |
| 1897 | 1899 | 1 |
| 1897 | 1900 | 1 |
| 1897 | 1901 | 1 |
| 1898 | 1905 | 1 |
| 1898 | 1906 | 1 |
| 1898 | 1907 | 1 |
| 1899 | 1902 | 1 |
| 1899 | 1903 | 1 |
| 1899 | 1904 | 1 |
| 1900 | 1902 | 1 |
| 1900 | 1903 | 1 |
| 1900 | 1904 | 1 |
| 1901 | 1908 | 1 |
| 1901 | 1912 | 1 |
| 1901 | 1916 | 1 |
| 1902 | 1905 | 1 |
| 1902 | 1906 | 1 |
| 1902 | 1907 | 1 |
| 1903 | 1905 | 1 |
| 1903 | 1906 | 1 |
| 1903 | 1907 | 1 |
| 1904 | 1909 | 1 |
| 1904 | 1910 | 1 |
| 1904 | 1911 | 1 |
| 1904 | 1913 | 1 |
| 1904 | 1914 | 1 |
| 1904 | 1915 | 1 |
| 1904 | 1917 | 1 |
| 1904 | 1918 | 1 |
| 1904 | 1919 | 1 |
| 1905 | 1908 | 1 |
| 1905 | 1912 | 1 |
| 1905 | 1916 | 1 |
| 1906 | 1908 | 1 |
| 1906 | 1912 | 1 |
| 1906 | 1916 | 1 |
| 1908 | 1913 | 1 |
| 1908 | 1914 | 1 |
| 1908 | 1915 | 1 |
| 1908 | 1917 | 1 |
| 1908 | 1918 | 1 |
| 1908 | 1919 | 1 |
| 1909 | 1912 | 1 |
| 1909 | 1916 | 1 |
| 1910 | 1912 | 1 |

|      |      |   |
|------|------|---|
| 1910 | 1916 | 1 |
| 1911 | 1912 | 1 |
| 1911 | 1916 | 1 |
| 1912 | 1917 | 1 |
| 1912 | 1918 | 1 |
| 1912 | 1919 | 1 |
| 1913 | 1916 | 1 |
| 1914 | 1916 | 1 |
| 1915 | 1916 | 1 |
| 1920 | 1929 | 1 |
| 1920 | 1930 | 1 |
| 1920 | 1955 | 1 |
| 1921 | 1923 | 1 |
| 1921 | 1924 | 1 |
| 1921 | 1926 | 1 |
| 1921 | 1927 | 1 |
| 1921 | 1928 | 1 |
| 1922 | 1926 | 1 |
| 1922 | 1927 | 1 |
| 1922 | 1928 | 1 |
| 1923 | 1925 | 1 |
| 1924 | 1925 | 1 |
| 1925 | 1931 | 1 |
| 1925 | 1932 | 1 |
| 1925 | 1933 | 1 |
| 1925 | 1956 | 1 |
| 1925 | 1957 | 1 |
| 1925 | 1983 | 1 |
| 1926 | 1929 | 1 |
| 1926 | 1930 | 1 |
| 1926 | 1955 | 1 |
| 1927 | 1929 | 1 |
| 1927 | 1930 | 1 |
| 1927 | 1955 | 1 |
| 1928 | 1934 | 1 |
| 1928 | 1935 | 1 |
| 1928 | 1936 | 1 |
| 1928 | 1958 | 1 |
| 1928 | 1959 | 1 |
| 1928 | 1984 | 1 |
| 1928 | 1985 | 1 |
| 1928 | 1988 | 1 |
| 1929 | 1931 | 1 |
| 1929 | 1932 | 1 |
| 1929 | 1933 | 1 |
| 1929 | 1956 | 1 |
| 1929 | 1957 | 1 |
| 1929 | 1983 | 1 |
| 1930 | 1937 | 1 |
| 1930 | 1938 | 1 |
| 1930 | 1939 | 1 |
| 1930 | 1956 | 1 |
| 1930 | 1957 | 1 |
| 1930 | 1983 | 1 |



|      |      |   |
|------|------|---|
| 1931 | 1934 | 1 |
| 1931 | 1935 | 1 |
| 1931 | 1936 | 1 |
| 1931 | 1955 | 1 |
| 1932 | 1934 | 1 |
| 1932 | 1935 | 1 |
| 1932 | 1936 | 1 |
| 1932 | 1955 | 1 |
| 1933 | 1940 | 1 |
| 1933 | 1941 | 1 |
| 1933 | 1942 | 1 |
| 1933 | 1955 | 1 |
| 1934 | 1937 | 1 |
| 1934 | 1938 | 1 |
| 1934 | 1939 | 1 |
| 1935 | 1937 | 1 |
| 1935 | 1938 | 1 |
| 1935 | 1939 | 1 |
| 1936 | 1943 | 1 |
| 1936 | 1944 | 1 |
| 1936 | 1945 | 1 |
| 1937 | 1940 | 1 |
| 1937 | 1941 | 1 |
| 1937 | 1942 | 1 |
| 1938 | 1940 | 1 |
| 1938 | 1941 | 1 |
| 1938 | 1942 | 1 |
| 1939 | 1946 | 1 |
| 1939 | 1947 | 1 |
| 1939 | 1948 | 1 |
| 1940 | 1943 | 1 |
| 1940 | 1944 | 1 |
| 1940 | 1945 | 1 |
| 1941 | 1943 | 1 |
| 1941 | 1944 | 1 |
| 1941 | 1945 | 1 |
| 1942 | 1949 | 1 |
| 1942 | 1950 | 1 |
| 1942 | 1951 | 1 |
| 1943 | 1946 | 1 |
| 1943 | 1947 | 1 |
| 1943 | 1948 | 1 |
| 1944 | 1946 | 1 |
| 1944 | 1947 | 1 |
| 1944 | 1948 | 1 |
| 1945 | 1952 | 1 |
| 1945 | 1953 | 1 |
| 1945 | 1954 | 1 |
| 1946 | 1949 | 1 |
| 1946 | 1950 | 1 |
| 1946 | 1951 | 1 |
| 1947 | 1949 | 1 |
| 1947 | 1950 | 1 |
| 1947 | 1951 | 1 |

|      |      |   |
|------|------|---|
| 1949 | 1952 | 1 |
| 1949 | 1953 | 1 |
| 1949 | 1954 | 1 |
| 1950 | 1952 | 1 |
| 1950 | 1953 | 1 |
| 1950 | 1954 | 1 |
| 1955 | 1960 | 1 |
| 1955 | 1961 | 1 |
| 1955 | 1986 | 1 |
| 1955 | 1987 | 1 |
| 1955 | 1989 | 1 |
| 1955 | 1990 | 1 |
| 1955 | 1991 | 1 |
| 1956 | 1958 | 1 |
| 1956 | 1959 | 1 |
| 1956 | 1984 | 1 |
| 1956 | 1985 | 1 |
| 1956 | 1988 | 1 |
| 1957 | 1962 | 1 |
| 1957 | 1963 | 1 |
| 1957 | 1964 | 1 |
| 1957 | 1984 | 1 |
| 1957 | 1985 | 1 |
| 1957 | 1988 | 1 |
| 1958 | 1960 | 1 |
| 1958 | 1961 | 1 |
| 1958 | 1983 | 1 |
| 1959 | 1965 | 1 |
| 1959 | 1966 | 1 |
| 1959 | 1967 | 1 |
| 1959 | 1983 | 1 |
| 1960 | 1962 | 1 |
| 1960 | 1963 | 1 |
| 1960 | 1964 | 1 |
| 1961 | 1968 | 1 |
| 1961 | 1969 | 1 |
| 1961 | 1970 | 1 |
| 1962 | 1965 | 1 |
| 1962 | 1966 | 1 |
| 1962 | 1967 | 1 |
| 1963 | 1965 | 1 |
| 1963 | 1966 | 1 |
| 1963 | 1967 | 1 |
| 1964 | 1971 | 1 |
| 1964 | 1975 | 1 |
| 1964 | 1979 | 1 |
| 1965 | 1968 | 1 |
| 1965 | 1969 | 1 |
| 1965 | 1970 | 1 |
| 1966 | 1968 | 1 |
| 1966 | 1969 | 1 |
| 1966 | 1970 | 1 |
| 1967 | 1972 | 1 |
| 1967 | 1973 | 1 |

|      |      |   |
|------|------|---|
| 1967 | 1974 | 1 |
| 1967 | 1976 | 1 |
| 1967 | 1977 | 1 |
| 1967 | 1978 | 1 |
| 1967 | 1980 | 1 |
| 1967 | 1981 | 1 |
| 1967 | 1982 | 1 |
| 1968 | 1971 | 1 |
| 1968 | 1975 | 1 |
| 1968 | 1979 | 1 |
| 1969 | 1971 | 1 |
| 1969 | 1975 | 1 |
| 1969 | 1979 | 1 |
| 1971 | 1976 | 1 |
| 1971 | 1977 | 1 |
| 1971 | 1978 | 1 |
| 1971 | 1980 | 1 |
| 1971 | 1981 | 1 |
| 1971 | 1982 | 1 |
| 1972 | 1975 | 1 |
| 1972 | 1979 | 1 |
| 1973 | 1975 | 1 |
| 1973 | 1979 | 1 |
| 1974 | 1975 | 1 |
| 1974 | 1979 | 1 |
| 1975 | 1980 | 1 |
| 1975 | 1981 | 1 |
| 1975 | 1982 | 1 |
| 1976 | 1979 | 1 |
| 1977 | 1979 | 1 |
| 1978 | 1979 | 1 |
| 1983 | 1992 | 1 |
| 1983 | 1993 | 1 |
| 1983 | 2018 | 1 |
| 1984 | 1986 | 1 |
| 1984 | 1987 | 1 |
| 1984 | 1989 | 1 |
| 1984 | 1990 | 1 |
| 1984 | 1991 | 1 |
| 1985 | 1989 | 1 |
| 1985 | 1990 | 1 |
| 1985 | 1991 | 1 |
| 1986 | 1988 | 1 |
| 1987 | 1988 | 1 |
| 1988 | 1994 | 1 |
| 1988 | 1995 | 1 |
| 1988 | 1996 | 1 |
| 1988 | 2019 | 1 |
| 1988 | 2020 | 1 |
| 1988 | 2046 | 1 |
| 1989 | 1992 | 1 |
| 1989 | 1993 | 1 |
| 1989 | 2018 | 1 |
| 1990 | 1992 | 1 |

|      |      |   |
|------|------|---|
| 1990 | 1993 | 1 |
| 1990 | 2018 | 1 |
| 1991 | 1997 | 1 |
| 1991 | 1998 | 1 |
| 1991 | 1999 | 1 |
| 1991 | 2021 | 1 |
| 1991 | 2022 | 1 |
| 1991 | 2047 | 1 |
| 1991 | 2048 | 1 |
| 1991 | 2051 | 1 |
| 1992 | 1994 | 1 |
| 1992 | 1995 | 1 |
| 1992 | 1996 | 1 |
| 1992 | 2019 | 1 |
| 1992 | 2020 | 1 |
| 1992 | 2046 | 1 |
| 1993 | 2000 | 1 |
| 1993 | 2001 | 1 |
| 1993 | 2002 | 1 |
| 1993 | 2019 | 1 |
| 1993 | 2020 | 1 |
| 1993 | 2046 | 1 |
| 1994 | 1997 | 1 |
| 1994 | 1998 | 1 |
| 1994 | 1999 | 1 |
| 1994 | 2018 | 1 |
| 1995 | 1997 | 1 |
| 1995 | 1998 | 1 |
| 1995 | 1999 | 1 |
| 1995 | 2018 | 1 |
| 1996 | 2003 | 1 |
| 1996 | 2004 | 1 |
| 1996 | 2005 | 1 |
| 1996 | 2018 | 1 |
| 1997 | 2000 | 1 |
| 1997 | 2001 | 1 |
| 1997 | 2002 | 1 |
| 1998 | 2000 | 1 |
| 1998 | 2001 | 1 |
| 1998 | 2002 | 1 |
| 1999 | 2006 | 1 |
| 1999 | 2007 | 1 |
| 1999 | 2008 | 1 |
| 2000 | 2003 | 1 |
| 2000 | 2004 | 1 |
| 2000 | 2005 | 1 |
| 2001 | 2003 | 1 |
| 2001 | 2004 | 1 |
| 2001 | 2005 | 1 |
| 2002 | 2009 | 1 |
| 2002 | 2010 | 1 |
| 2002 | 2011 | 1 |
| 2003 | 2006 | 1 |
| 2003 | 2007 | 1 |

|      |      |   |
|------|------|---|
| 2003 | 2008 | 1 |
| 2004 | 2006 | 1 |
| 2004 | 2007 | 1 |
| 2004 | 2008 | 1 |
| 2005 | 2012 | 1 |
| 2005 | 2013 | 1 |
| 2005 | 2014 | 1 |
| 2006 | 2009 | 1 |
| 2006 | 2010 | 1 |
| 2006 | 2011 | 1 |
| 2007 | 2009 | 1 |
| 2007 | 2010 | 1 |
| 2007 | 2011 | 1 |
| 2008 | 2015 | 1 |
| 2008 | 2016 | 1 |
| 2008 | 2017 | 1 |
| 2009 | 2012 | 1 |
| 2009 | 2013 | 1 |
| 2009 | 2014 | 1 |
| 2010 | 2012 | 1 |
| 2010 | 2013 | 1 |
| 2010 | 2014 | 1 |
| 2012 | 2015 | 1 |
| 2012 | 2016 | 1 |
| 2012 | 2017 | 1 |
| 2013 | 2015 | 1 |
| 2013 | 2016 | 1 |
| 2013 | 2017 | 1 |
| 2018 | 2023 | 1 |
| 2018 | 2024 | 1 |
| 2018 | 2049 | 1 |
| 2018 | 2050 | 1 |
| 2018 | 2052 | 1 |
| 2018 | 2053 | 1 |
| 2018 | 2054 | 1 |
| 2019 | 2021 | 1 |
| 2019 | 2022 | 1 |
| 2019 | 2047 | 1 |
| 2019 | 2048 | 1 |
| 2019 | 2051 | 1 |
| 2020 | 2025 | 1 |
| 2020 | 2026 | 1 |
| 2020 | 2027 | 1 |
| 2020 | 2047 | 1 |
| 2020 | 2048 | 1 |
| 2020 | 2051 | 1 |
| 2021 | 2023 | 1 |
| 2021 | 2024 | 1 |
| 2021 | 2046 | 1 |
| 2022 | 2028 | 1 |
| 2022 | 2029 | 1 |
| 2022 | 2030 | 1 |
| 2022 | 2046 | 1 |
| 2023 | 2025 | 1 |

|      |      |   |
|------|------|---|
| 2023 | 2026 | 1 |
| 2023 | 2027 | 1 |
| 2024 | 2031 | 1 |
| 2024 | 2032 | 1 |
| 2024 | 2033 | 1 |
| 2025 | 2028 | 1 |
| 2025 | 2029 | 1 |
| 2025 | 2030 | 1 |
| 2026 | 2028 | 1 |
| 2026 | 2029 | 1 |
| 2026 | 2030 | 1 |
| 2027 | 2034 | 1 |
| 2027 | 2038 | 1 |
| 2027 | 2042 | 1 |
| 2028 | 2031 | 1 |
| 2028 | 2032 | 1 |
| 2028 | 2033 | 1 |
| 2029 | 2031 | 1 |
| 2029 | 2032 | 1 |
| 2029 | 2033 | 1 |
| 2030 | 2035 | 1 |
| 2030 | 2036 | 1 |
| 2030 | 2037 | 1 |
| 2030 | 2039 | 1 |
| 2030 | 2040 | 1 |
| 2030 | 2041 | 1 |
| 2030 | 2043 | 1 |
| 2030 | 2044 | 1 |
| 2030 | 2045 | 1 |
| 2031 | 2034 | 1 |
| 2031 | 2038 | 1 |
| 2031 | 2042 | 1 |
| 2032 | 2034 | 1 |
| 2032 | 2038 | 1 |
| 2032 | 2042 | 1 |
| 2034 | 2039 | 1 |
| 2034 | 2040 | 1 |
| 2034 | 2041 | 1 |
| 2034 | 2043 | 1 |
| 2034 | 2044 | 1 |
| 2034 | 2045 | 1 |
| 2035 | 2038 | 1 |
| 2035 | 2042 | 1 |
| 2036 | 2038 | 1 |
| 2036 | 2042 | 1 |
| 2037 | 2038 | 1 |
| 2037 | 2042 | 1 |
| 2038 | 2043 | 1 |
| 2038 | 2044 | 1 |
| 2038 | 2045 | 1 |
| 2039 | 2042 | 1 |
| 2040 | 2042 | 1 |
| 2041 | 2042 | 1 |
| 2046 | 2055 | 1 |

|      |      |   |
|------|------|---|
| 2046 | 2056 | 1 |
| 2046 | 2081 | 1 |
| 2047 | 2049 | 1 |
| 2047 | 2050 | 1 |
| 2047 | 2052 | 1 |
| 2047 | 2053 | 1 |
| 2047 | 2054 | 1 |
| 2048 | 2052 | 1 |
| 2048 | 2053 | 1 |
| 2048 | 2054 | 1 |
| 2049 | 2051 | 1 |
| 2050 | 2051 | 1 |
| 2051 | 2057 | 1 |
| 2051 | 2058 | 1 |
| 2051 | 2059 | 1 |
| 2051 | 2082 | 1 |
| 2051 | 2083 | 1 |
| 2051 | 2109 | 1 |
| 2052 | 2055 | 1 |
| 2052 | 2056 | 1 |
| 2052 | 2081 | 1 |
| 2053 | 2055 | 1 |
| 2053 | 2056 | 1 |
| 2053 | 2081 | 1 |
| 2054 | 2060 | 1 |
| 2054 | 2061 | 1 |
| 2054 | 2062 | 1 |
| 2054 | 2084 | 1 |
| 2054 | 2085 | 1 |
| 2054 | 2110 | 1 |
| 2054 | 2111 | 1 |
| 2054 | 2114 | 1 |
| 2055 | 2057 | 1 |
| 2055 | 2058 | 1 |
| 2055 | 2059 | 1 |
| 2055 | 2082 | 1 |
| 2055 | 2083 | 1 |
| 2055 | 2109 | 1 |
| 2056 | 2063 | 1 |
| 2056 | 2064 | 1 |
| 2056 | 2065 | 1 |
| 2056 | 2082 | 1 |
| 2056 | 2083 | 1 |
| 2056 | 2109 | 1 |
| 2057 | 2060 | 1 |
| 2057 | 2061 | 1 |
| 2057 | 2062 | 1 |
| 2057 | 2081 | 1 |
| 2058 | 2060 | 1 |
| 2058 | 2061 | 1 |
| 2058 | 2062 | 1 |
| 2058 | 2081 | 1 |
| 2059 | 2066 | 1 |
| 2059 | 2067 | 1 |

|      |      |   |
|------|------|---|
| 2059 | 2068 | 1 |
| 2059 | 2081 | 1 |
| 2060 | 2063 | 1 |
| 2060 | 2064 | 1 |
| 2060 | 2065 | 1 |
| 2061 | 2063 | 1 |
| 2061 | 2064 | 1 |
| 2061 | 2065 | 1 |
| 2062 | 2069 | 1 |
| 2062 | 2070 | 1 |
| 2062 | 2071 | 1 |
| 2063 | 2066 | 1 |
| 2063 | 2067 | 1 |
| 2063 | 2068 | 1 |
| 2064 | 2066 | 1 |
| 2064 | 2067 | 1 |
| 2064 | 2068 | 1 |
| 2065 | 2072 | 1 |
| 2065 | 2073 | 1 |
| 2065 | 2074 | 1 |
| 2066 | 2069 | 1 |
| 2066 | 2070 | 1 |
| 2066 | 2071 | 1 |
| 2067 | 2069 | 1 |
| 2067 | 2070 | 1 |
| 2067 | 2071 | 1 |
| 2068 | 2075 | 1 |
| 2068 | 2076 | 1 |
| 2068 | 2077 | 1 |
| 2069 | 2072 | 1 |
| 2069 | 2073 | 1 |
| 2069 | 2074 | 1 |
| 2070 | 2072 | 1 |
| 2070 | 2073 | 1 |
| 2070 | 2074 | 1 |
| 2071 | 2078 | 1 |
| 2071 | 2079 | 1 |
| 2071 | 2080 | 1 |
| 2072 | 2075 | 1 |
| 2072 | 2076 | 1 |
| 2072 | 2077 | 1 |
| 2073 | 2075 | 1 |
| 2073 | 2076 | 1 |
| 2073 | 2077 | 1 |
| 2075 | 2078 | 1 |
| 2075 | 2079 | 1 |
| 2075 | 2080 | 1 |
| 2076 | 2078 | 1 |
| 2076 | 2079 | 1 |
| 2076 | 2080 | 1 |
| 2081 | 2086 | 1 |
| 2081 | 2087 | 1 |
| 2081 | 2112 | 1 |
| 2081 | 2113 | 1 |



|      |      |   |
|------|------|---|
| 2081 | 2115 | 1 |
| 2081 | 2116 | 1 |
| 2081 | 2117 | 1 |
| 2082 | 2084 | 1 |
| 2082 | 2085 | 1 |
| 2082 | 2110 | 1 |
| 2082 | 2111 | 1 |
| 2082 | 2114 | 1 |
| 2083 | 2088 | 1 |
| 2083 | 2089 | 1 |
| 2083 | 2090 | 1 |
| 2083 | 2110 | 1 |
| 2083 | 2111 | 1 |
| 2083 | 2114 | 1 |
| 2084 | 2086 | 1 |
| 2084 | 2087 | 1 |
| 2084 | 2109 | 1 |
| 2085 | 2091 | 1 |
| 2085 | 2092 | 1 |
| 2085 | 2093 | 1 |
| 2085 | 2109 | 1 |
| 2086 | 2088 | 1 |
| 2086 | 2089 | 1 |
| 2086 | 2090 | 1 |
| 2087 | 2094 | 1 |
| 2087 | 2095 | 1 |
| 2087 | 2096 | 1 |
| 2088 | 2091 | 1 |
| 2088 | 2092 | 1 |
| 2088 | 2093 | 1 |
| 2089 | 2091 | 1 |
| 2089 | 2092 | 1 |
| 2089 | 2093 | 1 |
| 2090 | 2097 | 1 |
| 2090 | 2101 | 1 |
| 2090 | 2105 | 1 |
| 2091 | 2094 | 1 |
| 2091 | 2095 | 1 |
| 2091 | 2096 | 1 |
| 2092 | 2094 | 1 |
| 2092 | 2095 | 1 |
| 2092 | 2096 | 1 |
| 2093 | 2098 | 1 |
| 2093 | 2099 | 1 |
| 2093 | 2100 | 1 |
| 2093 | 2102 | 1 |
| 2093 | 2103 | 1 |
| 2093 | 2104 | 1 |
| 2093 | 2106 | 1 |
| 2093 | 2107 | 1 |
| 2093 | 2108 | 1 |
| 2094 | 2097 | 1 |
| 2094 | 2101 | 1 |
| 2094 | 2105 | 1 |

|      |      |   |
|------|------|---|
| 2095 | 2097 | 1 |
| 2095 | 2101 | 1 |
| 2095 | 2105 | 1 |
| 2097 | 2102 | 1 |
| 2097 | 2103 | 1 |
| 2097 | 2104 | 1 |
| 2097 | 2106 | 1 |
| 2097 | 2107 | 1 |
| 2097 | 2108 | 1 |
| 2098 | 2101 | 1 |
| 2098 | 2105 | 1 |
| 2099 | 2101 | 1 |
| 2099 | 2105 | 1 |
| 2100 | 2101 | 1 |
| 2100 | 2105 | 1 |
| 2101 | 2106 | 1 |
| 2101 | 2107 | 1 |
| 2101 | 2108 | 1 |
| 2102 | 2105 | 1 |
| 2103 | 2105 | 1 |
| 2104 | 2105 | 1 |
| 2109 | 2118 | 1 |
| 2109 | 2119 | 1 |
| 2109 | 2144 | 1 |
| 2110 | 2112 | 1 |
| 2110 | 2113 | 1 |
| 2110 | 2115 | 1 |
| 2110 | 2116 | 1 |
| 2110 | 2117 | 1 |
| 2111 | 2115 | 1 |
| 2111 | 2116 | 1 |
| 2111 | 2117 | 1 |
| 2112 | 2114 | 1 |
| 2113 | 2114 | 1 |
| 2114 | 2120 | 1 |
| 2114 | 2121 | 1 |
| 2114 | 2122 | 1 |
| 2114 | 2145 | 1 |
| 2114 | 2146 | 1 |
| 2114 | 2172 | 1 |
| 2115 | 2118 | 1 |
| 2115 | 2119 | 1 |
| 2115 | 2144 | 1 |
| 2116 | 2118 | 1 |
| 2116 | 2119 | 1 |
| 2116 | 2144 | 1 |
| 2117 | 2123 | 1 |
| 2117 | 2124 | 1 |
| 2117 | 2125 | 1 |
| 2117 | 2147 | 1 |
| 2117 | 2148 | 1 |
| 2117 | 2173 | 1 |
| 2117 | 2174 | 1 |
| 2117 | 2177 | 1 |

|      |      |   |
|------|------|---|
| 2118 | 2120 | 1 |
| 2118 | 2121 | 1 |
| 2118 | 2122 | 1 |
| 2118 | 2145 | 1 |
| 2118 | 2146 | 1 |
| 2118 | 2172 | 1 |
| 2119 | 2126 | 1 |
| 2119 | 2127 | 1 |
| 2119 | 2128 | 1 |
| 2119 | 2145 | 1 |
| 2119 | 2146 | 1 |
| 2119 | 2172 | 1 |
| 2120 | 2123 | 1 |
| 2120 | 2124 | 1 |
| 2120 | 2125 | 1 |
| 2120 | 2144 | 1 |
| 2121 | 2123 | 1 |
| 2121 | 2124 | 1 |
| 2121 | 2125 | 1 |
| 2121 | 2144 | 1 |
| 2122 | 2129 | 1 |
| 2122 | 2130 | 1 |
| 2122 | 2131 | 1 |
| 2122 | 2144 | 1 |
| 2123 | 2126 | 1 |
| 2123 | 2127 | 1 |
| 2123 | 2128 | 1 |
| 2124 | 2126 | 1 |
| 2124 | 2127 | 1 |
| 2124 | 2128 | 1 |
| 2125 | 2132 | 1 |
| 2125 | 2133 | 1 |
| 2125 | 2134 | 1 |
| 2126 | 2129 | 1 |
| 2126 | 2130 | 1 |
| 2126 | 2131 | 1 |
| 2127 | 2129 | 1 |
| 2127 | 2130 | 1 |
| 2127 | 2131 | 1 |
| 2128 | 2135 | 1 |
| 2128 | 2136 | 1 |
| 2128 | 2137 | 1 |
| 2129 | 2132 | 1 |
| 2129 | 2133 | 1 |
| 2129 | 2134 | 1 |
| 2130 | 2132 | 1 |
| 2130 | 2133 | 1 |
| 2130 | 2134 | 1 |
| 2131 | 2138 | 1 |
| 2131 | 2139 | 1 |
| 2131 | 2140 | 1 |
| 2132 | 2135 | 1 |
| 2132 | 2136 | 1 |
| 2132 | 2137 | 1 |

|      |      |   |
|------|------|---|
| 2133 | 2135 | 1 |
| 2133 | 2136 | 1 |
| 2133 | 2137 | 1 |
| 2134 | 2141 | 1 |
| 2134 | 2142 | 1 |
| 2134 | 2143 | 1 |
| 2135 | 2138 | 1 |
| 2135 | 2139 | 1 |
| 2135 | 2140 | 1 |
| 2136 | 2138 | 1 |
| 2136 | 2139 | 1 |
| 2136 | 2140 | 1 |
| 2138 | 2141 | 1 |
| 2138 | 2142 | 1 |
| 2138 | 2143 | 1 |
| 2139 | 2141 | 1 |
| 2139 | 2142 | 1 |
| 2139 | 2143 | 1 |
| 2144 | 2149 | 1 |
| 2144 | 2150 | 1 |
| 2144 | 2175 | 1 |
| 2144 | 2176 | 1 |
| 2144 | 2178 | 1 |
| 2144 | 2179 | 1 |
| 2144 | 2180 | 1 |
| 2145 | 2147 | 1 |
| 2145 | 2148 | 1 |
| 2145 | 2173 | 1 |
| 2145 | 2174 | 1 |
| 2145 | 2177 | 1 |
| 2146 | 2151 | 1 |
| 2146 | 2152 | 1 |
| 2146 | 2153 | 1 |
| 2146 | 2173 | 1 |
| 2146 | 2174 | 1 |
| 2146 | 2177 | 1 |
| 2147 | 2149 | 1 |
| 2147 | 2150 | 1 |
| 2147 | 2172 | 1 |
| 2148 | 2154 | 1 |
| 2148 | 2155 | 1 |
| 2148 | 2156 | 1 |
| 2148 | 2172 | 1 |
| 2149 | 2151 | 1 |
| 2149 | 2152 | 1 |
| 2149 | 2153 | 1 |
| 2150 | 2157 | 1 |
| 2150 | 2158 | 1 |
| 2150 | 2159 | 1 |
| 2151 | 2154 | 1 |
| 2151 | 2155 | 1 |
| 2151 | 2156 | 1 |
| 2152 | 2154 | 1 |
| 2152 | 2155 | 1 |

|      |      |   |
|------|------|---|
| 2152 | 2156 | 1 |
| 2153 | 2160 | 1 |
| 2153 | 2164 | 1 |
| 2153 | 2168 | 1 |
| 2154 | 2157 | 1 |
| 2154 | 2158 | 1 |
| 2154 | 2159 | 1 |
| 2155 | 2157 | 1 |
| 2155 | 2158 | 1 |
| 2155 | 2159 | 1 |
| 2156 | 2161 | 1 |
| 2156 | 2162 | 1 |
| 2156 | 2163 | 1 |
| 2156 | 2165 | 1 |
| 2156 | 2166 | 1 |
| 2156 | 2167 | 1 |
| 2156 | 2169 | 1 |
| 2156 | 2170 | 1 |
| 2156 | 2171 | 1 |
| 2157 | 2160 | 1 |
| 2157 | 2164 | 1 |
| 2157 | 2168 | 1 |
| 2158 | 2160 | 1 |
| 2158 | 2164 | 1 |
| 2158 | 2168 | 1 |
| 2160 | 2165 | 1 |
| 2160 | 2166 | 1 |
| 2160 | 2167 | 1 |
| 2160 | 2169 | 1 |
| 2160 | 2170 | 1 |
| 2160 | 2171 | 1 |
| 2161 | 2164 | 1 |
| 2161 | 2168 | 1 |
| 2162 | 2164 | 1 |
| 2162 | 2168 | 1 |
| 2163 | 2164 | 1 |
| 2163 | 2168 | 1 |
| 2164 | 2169 | 1 |
| 2164 | 2170 | 1 |
| 2164 | 2171 | 1 |
| 2165 | 2168 | 1 |
| 2166 | 2168 | 1 |
| 2167 | 2168 | 1 |
| 2172 | 2181 | 1 |
| 2172 | 2182 | 1 |
| 2172 | 2207 | 1 |
| 2173 | 2175 | 1 |
| 2173 | 2176 | 1 |
| 2173 | 2178 | 1 |
| 2173 | 2179 | 1 |
| 2173 | 2180 | 1 |
| 2174 | 2178 | 1 |
| 2174 | 2179 | 1 |
| 2174 | 2180 | 1 |

|      |      |   |
|------|------|---|
| 2175 | 2177 | 1 |
| 2176 | 2177 | 1 |
| 2177 | 2183 | 1 |
| 2177 | 2184 | 1 |
| 2177 | 2185 | 1 |
| 2177 | 2208 | 1 |
| 2177 | 2209 | 1 |
| 2177 | 2235 | 1 |
| 2178 | 2181 | 1 |
| 2178 | 2182 | 1 |
| 2178 | 2207 | 1 |
| 2179 | 2181 | 1 |
| 2179 | 2182 | 1 |
| 2179 | 2207 | 1 |
| 2180 | 2186 | 1 |
| 2180 | 2187 | 1 |
| 2180 | 2188 | 1 |
| 2180 | 2210 | 1 |
| 2180 | 2211 | 1 |
| 2180 | 2236 | 1 |
| 2180 | 2237 | 1 |
| 2180 | 2240 | 1 |
| 2181 | 2183 | 1 |
| 2181 | 2184 | 1 |
| 2181 | 2185 | 1 |
| 2181 | 2208 | 1 |
| 2181 | 2209 | 1 |
| 2181 | 2235 | 1 |
| 2182 | 2189 | 1 |
| 2182 | 2190 | 1 |
| 2182 | 2191 | 1 |
| 2182 | 2208 | 1 |
| 2182 | 2209 | 1 |
| 2182 | 2235 | 1 |
| 2183 | 2186 | 1 |
| 2183 | 2187 | 1 |
| 2183 | 2188 | 1 |
| 2183 | 2207 | 1 |
| 2184 | 2186 | 1 |
| 2184 | 2187 | 1 |
| 2184 | 2188 | 1 |
| 2184 | 2207 | 1 |
| 2185 | 2192 | 1 |
| 2185 | 2193 | 1 |
| 2185 | 2194 | 1 |
| 2185 | 2207 | 1 |
| 2186 | 2189 | 1 |
| 2186 | 2190 | 1 |
| 2186 | 2191 | 1 |
| 2187 | 2189 | 1 |
| 2187 | 2190 | 1 |
| 2187 | 2191 | 1 |
| 2188 | 2195 | 1 |
| 2188 | 2196 | 1 |

|      |      |   |
|------|------|---|
| 2188 | 2197 | 1 |
| 2189 | 2192 | 1 |
| 2189 | 2193 | 1 |
| 2189 | 2194 | 1 |
| 2190 | 2192 | 1 |
| 2190 | 2193 | 1 |
| 2190 | 2194 | 1 |
| 2191 | 2198 | 1 |
| 2191 | 2199 | 1 |
| 2191 | 2200 | 1 |
| 2192 | 2195 | 1 |
| 2192 | 2196 | 1 |
| 2192 | 2197 | 1 |
| 2193 | 2195 | 1 |
| 2193 | 2196 | 1 |
| 2193 | 2197 | 1 |
| 2194 | 2201 | 1 |
| 2194 | 2202 | 1 |
| 2194 | 2203 | 1 |
| 2195 | 2198 | 1 |
| 2195 | 2199 | 1 |
| 2195 | 2200 | 1 |
| 2196 | 2198 | 1 |
| 2196 | 2199 | 1 |
| 2196 | 2200 | 1 |
| 2197 | 2204 | 1 |
| 2197 | 2205 | 1 |
| 2197 | 2206 | 1 |
| 2198 | 2201 | 1 |
| 2198 | 2202 | 1 |
| 2198 | 2203 | 1 |
| 2199 | 2201 | 1 |
| 2199 | 2202 | 1 |
| 2199 | 2203 | 1 |
| 2201 | 2204 | 1 |
| 2201 | 2205 | 1 |
| 2201 | 2206 | 1 |
| 2202 | 2204 | 1 |
| 2202 | 2205 | 1 |
| 2202 | 2206 | 1 |
| 2207 | 2212 | 1 |
| 2207 | 2213 | 1 |
| 2207 | 2238 | 1 |
| 2207 | 2239 | 1 |
| 2207 | 2241 | 1 |
| 2207 | 2242 | 1 |
| 2207 | 2243 | 1 |
| 2208 | 2210 | 1 |
| 2208 | 2211 | 1 |
| 2208 | 2236 | 1 |
| 2208 | 2237 | 1 |
| 2208 | 2240 | 1 |
| 2209 | 2214 | 1 |
| 2209 | 2215 | 1 |

|      |      |   |
|------|------|---|
| 2209 | 2216 | 1 |
| 2209 | 2236 | 1 |
| 2209 | 2237 | 1 |
| 2209 | 2240 | 1 |
| 2210 | 2212 | 1 |
| 2210 | 2213 | 1 |
| 2210 | 2235 | 1 |
| 2211 | 2217 | 1 |
| 2211 | 2218 | 1 |
| 2211 | 2219 | 1 |
| 2211 | 2235 | 1 |
| 2212 | 2214 | 1 |
| 2212 | 2215 | 1 |
| 2212 | 2216 | 1 |
| 2213 | 2220 | 1 |
| 2213 | 2221 | 1 |
| 2213 | 2222 | 1 |
| 2214 | 2217 | 1 |
| 2214 | 2218 | 1 |
| 2214 | 2219 | 1 |
| 2215 | 2217 | 1 |
| 2215 | 2218 | 1 |
| 2215 | 2219 | 1 |
| 2216 | 2223 | 1 |
| 2216 | 2227 | 1 |
| 2216 | 2231 | 1 |
| 2217 | 2220 | 1 |
| 2217 | 2221 | 1 |
| 2217 | 2222 | 1 |
| 2218 | 2220 | 1 |
| 2218 | 2221 | 1 |
| 2218 | 2222 | 1 |
| 2219 | 2224 | 1 |
| 2219 | 2225 | 1 |
| 2219 | 2226 | 1 |
| 2219 | 2228 | 1 |
| 2219 | 2229 | 1 |
| 2219 | 2230 | 1 |
| 2219 | 2232 | 1 |
| 2219 | 2233 | 1 |
| 2219 | 2234 | 1 |
| 2220 | 2223 | 1 |
| 2220 | 2227 | 1 |
| 2220 | 2231 | 1 |
| 2221 | 2223 | 1 |
| 2221 | 2227 | 1 |
| 2221 | 2231 | 1 |
| 2223 | 2228 | 1 |
| 2223 | 2229 | 1 |
| 2223 | 2230 | 1 |
| 2223 | 2232 | 1 |
| 2223 | 2233 | 1 |
| 2223 | 2234 | 1 |
| 2224 | 2227 | 1 |



|      |      |   |
|------|------|---|
| 2224 | 2231 | 1 |
| 2225 | 2227 | 1 |
| 2225 | 2231 | 1 |
| 2226 | 2227 | 1 |
| 2226 | 2231 | 1 |
| 2227 | 2232 | 1 |
| 2227 | 2233 | 1 |
| 2227 | 2234 | 1 |
| 2228 | 2231 | 1 |
| 2229 | 2231 | 1 |
| 2230 | 2231 | 1 |
| 2235 | 2244 | 1 |
| 2235 | 2245 | 1 |
| 2235 | 2270 | 1 |
| 2236 | 2238 | 1 |
| 2236 | 2239 | 1 |
| 2236 | 2241 | 1 |
| 2236 | 2242 | 1 |
| 2236 | 2243 | 1 |
| 2237 | 2241 | 1 |
| 2237 | 2242 | 1 |
| 2237 | 2243 | 1 |
| 2238 | 2240 | 1 |
| 2239 | 2240 | 1 |
| 2240 | 2246 | 1 |
| 2240 | 2247 | 1 |
| 2240 | 2248 | 1 |
| 2240 | 2271 | 1 |
| 2240 | 2272 | 1 |
| 2240 | 2298 | 1 |
| 2241 | 2244 | 1 |
| 2241 | 2245 | 1 |
| 2241 | 2270 | 1 |
| 2242 | 2244 | 1 |
| 2242 | 2245 | 1 |
| 2242 | 2270 | 1 |
| 2243 | 2249 | 1 |
| 2243 | 2250 | 1 |
| 2243 | 2251 | 1 |
| 2243 | 2273 | 1 |
| 2243 | 2274 | 1 |
| 2243 | 2299 | 1 |
| 2243 | 2300 | 1 |
| 2243 | 2303 | 1 |
| 2244 | 2246 | 1 |
| 2244 | 2247 | 1 |
| 2244 | 2248 | 1 |
| 2244 | 2271 | 1 |
| 2244 | 2272 | 1 |
| 2244 | 2298 | 1 |
| 2245 | 2252 | 1 |
| 2245 | 2253 | 1 |
| 2245 | 2254 | 1 |
| 2245 | 2271 | 1 |

|      |      |   |
|------|------|---|
| 2245 | 2272 | 1 |
| 2245 | 2298 | 1 |
| 2246 | 2249 | 1 |
| 2246 | 2250 | 1 |
| 2246 | 2251 | 1 |
| 2246 | 2270 | 1 |
| 2247 | 2249 | 1 |
| 2247 | 2250 | 1 |
| 2247 | 2251 | 1 |
| 2247 | 2270 | 1 |
| 2248 | 2255 | 1 |
| 2248 | 2256 | 1 |
| 2248 | 2257 | 1 |
| 2248 | 2270 | 1 |
| 2249 | 2252 | 1 |
| 2249 | 2253 | 1 |
| 2249 | 2254 | 1 |
| 2250 | 2252 | 1 |
| 2250 | 2253 | 1 |
| 2250 | 2254 | 1 |
| 2251 | 2258 | 1 |
| 2251 | 2259 | 1 |
| 2251 | 2260 | 1 |
| 2252 | 2255 | 1 |
| 2252 | 2256 | 1 |
| 2252 | 2257 | 1 |
| 2253 | 2255 | 1 |
| 2253 | 2256 | 1 |
| 2253 | 2257 | 1 |
| 2254 | 2261 | 1 |
| 2254 | 2262 | 1 |
| 2254 | 2263 | 1 |
| 2255 | 2258 | 1 |
| 2255 | 2259 | 1 |
| 2255 | 2260 | 1 |
| 2256 | 2258 | 1 |
| 2256 | 2259 | 1 |
| 2256 | 2260 | 1 |
| 2257 | 2264 | 1 |
| 2257 | 2265 | 1 |
| 2257 | 2266 | 1 |
| 2258 | 2261 | 1 |
| 2258 | 2262 | 1 |
| 2258 | 2263 | 1 |
| 2259 | 2261 | 1 |
| 2259 | 2262 | 1 |
| 2259 | 2263 | 1 |
| 2260 | 2267 | 1 |
| 2260 | 2268 | 1 |
| 2260 | 2269 | 1 |
| 2261 | 2264 | 1 |
| 2261 | 2265 | 1 |
| 2261 | 2266 | 1 |
| 2262 | 2264 | 1 |

|      |      |   |
|------|------|---|
| 2262 | 2265 | 1 |
| 2262 | 2266 | 1 |
| 2264 | 2267 | 1 |
| 2264 | 2268 | 1 |
| 2264 | 2269 | 1 |
| 2265 | 2267 | 1 |
| 2265 | 2268 | 1 |
| 2265 | 2269 | 1 |
| 2270 | 2275 | 1 |
| 2270 | 2276 | 1 |
| 2270 | 2301 | 1 |
| 2270 | 2302 | 1 |
| 2270 | 2304 | 1 |
| 2270 | 2305 | 1 |
| 2270 | 2306 | 1 |
| 2271 | 2273 | 1 |
| 2271 | 2274 | 1 |
| 2271 | 2299 | 1 |
| 2271 | 2300 | 1 |
| 2271 | 2303 | 1 |
| 2272 | 2277 | 1 |
| 2272 | 2278 | 1 |
| 2272 | 2279 | 1 |
| 2272 | 2299 | 1 |
| 2272 | 2300 | 1 |
| 2272 | 2303 | 1 |
| 2273 | 2275 | 1 |
| 2273 | 2276 | 1 |
| 2273 | 2298 | 1 |
| 2274 | 2280 | 1 |
| 2274 | 2281 | 1 |
| 2274 | 2282 | 1 |
| 2274 | 2298 | 1 |
| 2275 | 2277 | 1 |
| 2275 | 2278 | 1 |
| 2275 | 2279 | 1 |
| 2276 | 2283 | 1 |
| 2276 | 2284 | 1 |
| 2276 | 2285 | 1 |
| 2277 | 2280 | 1 |
| 2277 | 2281 | 1 |
| 2277 | 2282 | 1 |
| 2278 | 2280 | 1 |
| 2278 | 2281 | 1 |
| 2278 | 2282 | 1 |
| 2279 | 2286 | 1 |
| 2279 | 2290 | 1 |
| 2279 | 2294 | 1 |
| 2280 | 2283 | 1 |
| 2280 | 2284 | 1 |
| 2280 | 2285 | 1 |
| 2281 | 2283 | 1 |
| 2281 | 2284 | 1 |
| 2281 | 2285 | 1 |

|      |      |   |
|------|------|---|
| 2282 | 2287 | 1 |
| 2282 | 2288 | 1 |
| 2282 | 2289 | 1 |
| 2282 | 2291 | 1 |
| 2282 | 2292 | 1 |
| 2282 | 2293 | 1 |
| 2282 | 2295 | 1 |
| 2282 | 2296 | 1 |
| 2282 | 2297 | 1 |
| 2283 | 2286 | 1 |
| 2283 | 2290 | 1 |
| 2283 | 2294 | 1 |
| 2284 | 2286 | 1 |
| 2284 | 2290 | 1 |
| 2284 | 2294 | 1 |
| 2286 | 2291 | 1 |
| 2286 | 2292 | 1 |
| 2286 | 2293 | 1 |
| 2286 | 2295 | 1 |
| 2286 | 2296 | 1 |
| 2286 | 2297 | 1 |
| 2287 | 2290 | 1 |
| 2287 | 2294 | 1 |
| 2288 | 2290 | 1 |
| 2288 | 2294 | 1 |
| 2289 | 2290 | 1 |
| 2289 | 2294 | 1 |
| 2290 | 2295 | 1 |
| 2290 | 2296 | 1 |
| 2290 | 2297 | 1 |
| 2291 | 2294 | 1 |
| 2292 | 2294 | 1 |
| 2293 | 2294 | 1 |
| 2298 | 2307 | 1 |
| 2298 | 2308 | 1 |
| 2298 | 2333 | 1 |
| 2299 | 2301 | 1 |
| 2299 | 2302 | 1 |
| 2299 | 2304 | 1 |
| 2299 | 2305 | 1 |
| 2299 | 2306 | 1 |
| 2300 | 2304 | 1 |
| 2300 | 2305 | 1 |
| 2300 | 2306 | 1 |
| 2301 | 2303 | 1 |
| 2302 | 2303 | 1 |
| 2303 | 2309 | 1 |
| 2303 | 2310 | 1 |
| 2303 | 2311 | 1 |
| 2303 | 2334 | 1 |
| 2303 | 2335 | 1 |
| 2303 | 2361 | 1 |
| 2304 | 2307 | 1 |
| 2304 | 2308 | 1 |

|      |      |   |
|------|------|---|
| 2304 | 2333 | 1 |
| 2305 | 2307 | 1 |
| 2305 | 2308 | 1 |
| 2305 | 2333 | 1 |
| 2306 | 2312 | 1 |
| 2306 | 2313 | 1 |
| 2306 | 2314 | 1 |
| 2306 | 2336 | 1 |
| 2306 | 2337 | 1 |
| 2306 | 2362 | 1 |
| 2306 | 2363 | 1 |
| 2306 | 2366 | 1 |
| 2307 | 2309 | 1 |
| 2307 | 2310 | 1 |
| 2307 | 2311 | 1 |
| 2307 | 2334 | 1 |
| 2307 | 2335 | 1 |
| 2307 | 2361 | 1 |
| 2308 | 2315 | 1 |
| 2308 | 2316 | 1 |
| 2308 | 2317 | 1 |
| 2308 | 2334 | 1 |
| 2308 | 2335 | 1 |
| 2308 | 2361 | 1 |
| 2309 | 2312 | 1 |
| 2309 | 2313 | 1 |
| 2309 | 2314 | 1 |
| 2309 | 2333 | 1 |
| 2310 | 2312 | 1 |
| 2310 | 2313 | 1 |
| 2310 | 2314 | 1 |
| 2310 | 2333 | 1 |
| 2311 | 2318 | 1 |
| 2311 | 2319 | 1 |
| 2311 | 2320 | 1 |
| 2311 | 2333 | 1 |
| 2312 | 2315 | 1 |
| 2312 | 2316 | 1 |
| 2312 | 2317 | 1 |
| 2313 | 2315 | 1 |
| 2313 | 2316 | 1 |
| 2313 | 2317 | 1 |
| 2314 | 2321 | 1 |
| 2314 | 2322 | 1 |
| 2314 | 2323 | 1 |
| 2315 | 2318 | 1 |
| 2315 | 2319 | 1 |
| 2315 | 2320 | 1 |
| 2316 | 2318 | 1 |
| 2316 | 2319 | 1 |
| 2316 | 2320 | 1 |
| 2317 | 2324 | 1 |
| 2317 | 2325 | 1 |
| 2317 | 2326 | 1 |

|      |      |   |
|------|------|---|
| 2318 | 2321 | 1 |
| 2318 | 2322 | 1 |
| 2318 | 2323 | 1 |
| 2319 | 2321 | 1 |
| 2319 | 2322 | 1 |
| 2319 | 2323 | 1 |
| 2320 | 2327 | 1 |
| 2320 | 2328 | 1 |
| 2320 | 2329 | 1 |
| 2321 | 2324 | 1 |
| 2321 | 2325 | 1 |
| 2321 | 2326 | 1 |
| 2322 | 2324 | 1 |
| 2322 | 2325 | 1 |
| 2322 | 2326 | 1 |
| 2323 | 2330 | 1 |
| 2323 | 2331 | 1 |
| 2323 | 2332 | 1 |
| 2324 | 2327 | 1 |
| 2324 | 2328 | 1 |
| 2324 | 2329 | 1 |
| 2325 | 2327 | 1 |
| 2325 | 2328 | 1 |
| 2325 | 2329 | 1 |
| 2327 | 2330 | 1 |
| 2327 | 2331 | 1 |
| 2327 | 2332 | 1 |
| 2328 | 2330 | 1 |
| 2328 | 2331 | 1 |
| 2328 | 2332 | 1 |
| 2333 | 2338 | 1 |
| 2333 | 2339 | 1 |
| 2333 | 2364 | 1 |
| 2333 | 2365 | 1 |
| 2333 | 2367 | 1 |
| 2333 | 2368 | 1 |
| 2333 | 2369 | 1 |
| 2334 | 2336 | 1 |
| 2334 | 2337 | 1 |
| 2334 | 2362 | 1 |
| 2334 | 2363 | 1 |
| 2334 | 2366 | 1 |
| 2335 | 2340 | 1 |
| 2335 | 2341 | 1 |
| 2335 | 2342 | 1 |
| 2335 | 2362 | 1 |
| 2335 | 2363 | 1 |
| 2335 | 2366 | 1 |
| 2336 | 2338 | 1 |
| 2336 | 2339 | 1 |
| 2336 | 2361 | 1 |
| 2337 | 2343 | 1 |
| 2337 | 2344 | 1 |
| 2337 | 2345 | 1 |

|      |      |   |
|------|------|---|
| 2337 | 2361 | 1 |
| 2338 | 2340 | 1 |
| 2338 | 2341 | 1 |
| 2338 | 2342 | 1 |
| 2339 | 2346 | 1 |
| 2339 | 2347 | 1 |
| 2339 | 2348 | 1 |
| 2340 | 2343 | 1 |
| 2340 | 2344 | 1 |
| 2340 | 2345 | 1 |
| 2341 | 2343 | 1 |
| 2341 | 2344 | 1 |
| 2341 | 2345 | 1 |
| 2342 | 2349 | 1 |
| 2342 | 2353 | 1 |
| 2342 | 2357 | 1 |
| 2343 | 2346 | 1 |
| 2343 | 2347 | 1 |
| 2343 | 2348 | 1 |
| 2344 | 2346 | 1 |
| 2344 | 2347 | 1 |
| 2344 | 2348 | 1 |
| 2345 | 2350 | 1 |
| 2345 | 2351 | 1 |
| 2345 | 2352 | 1 |
| 2345 | 2354 | 1 |
| 2345 | 2355 | 1 |
| 2345 | 2356 | 1 |
| 2345 | 2358 | 1 |
| 2345 | 2359 | 1 |
| 2345 | 2360 | 1 |
| 2346 | 2349 | 1 |
| 2346 | 2353 | 1 |
| 2346 | 2357 | 1 |
| 2347 | 2349 | 1 |
| 2347 | 2353 | 1 |
| 2347 | 2357 | 1 |
| 2349 | 2354 | 1 |
| 2349 | 2355 | 1 |
| 2349 | 2356 | 1 |
| 2349 | 2358 | 1 |
| 2349 | 2359 | 1 |
| 2349 | 2360 | 1 |
| 2350 | 2353 | 1 |
| 2350 | 2357 | 1 |
| 2351 | 2353 | 1 |
| 2351 | 2357 | 1 |
| 2352 | 2353 | 1 |
| 2352 | 2357 | 1 |
| 2353 | 2358 | 1 |
| 2353 | 2359 | 1 |
| 2353 | 2360 | 1 |
| 2354 | 2357 | 1 |
| 2355 | 2357 | 1 |

|      |      |   |
|------|------|---|
| 2356 | 2357 | 1 |
| 2361 | 2370 | 1 |
| 2361 | 2371 | 1 |
| 2361 | 2396 | 1 |
| 2362 | 2364 | 1 |
| 2362 | 2365 | 1 |
| 2362 | 2367 | 1 |
| 2362 | 2368 | 1 |
| 2362 | 2369 | 1 |
| 2363 | 2367 | 1 |
| 2363 | 2368 | 1 |
| 2363 | 2369 | 1 |
| 2364 | 2366 | 1 |
| 2365 | 2366 | 1 |
| 2366 | 2372 | 1 |
| 2366 | 2373 | 1 |
| 2366 | 2374 | 1 |
| 2366 | 2397 | 1 |
| 2366 | 2398 | 1 |
| 2366 | 2424 | 1 |
| 2367 | 2370 | 1 |
| 2367 | 2371 | 1 |
| 2367 | 2396 | 1 |
| 2368 | 2370 | 1 |
| 2368 | 2371 | 1 |
| 2368 | 2396 | 1 |
| 2369 | 2375 | 1 |
| 2369 | 2376 | 1 |
| 2369 | 2377 | 1 |
| 2369 | 2399 | 1 |
| 2369 | 2400 | 1 |
| 2369 | 2425 | 1 |
| 2369 | 2426 | 1 |
| 2369 | 2429 | 1 |
| 2370 | 2372 | 1 |
| 2370 | 2373 | 1 |
| 2370 | 2374 | 1 |
| 2370 | 2397 | 1 |
| 2370 | 2398 | 1 |
| 2370 | 2424 | 1 |
| 2371 | 2378 | 1 |
| 2371 | 2379 | 1 |
| 2371 | 2380 | 1 |
| 2371 | 2397 | 1 |
| 2371 | 2398 | 1 |
| 2371 | 2424 | 1 |
| 2372 | 2375 | 1 |
| 2372 | 2376 | 1 |
| 2372 | 2377 | 1 |
| 2372 | 2396 | 1 |
| 2373 | 2375 | 1 |
| 2373 | 2376 | 1 |
| 2373 | 2377 | 1 |
| 2373 | 2396 | 1 |



|      |      |   |
|------|------|---|
| 2374 | 2381 | 1 |
| 2374 | 2382 | 1 |
| 2374 | 2383 | 1 |
| 2374 | 2396 | 1 |
| 2375 | 2378 | 1 |
| 2375 | 2379 | 1 |
| 2375 | 2380 | 1 |
| 2376 | 2378 | 1 |
| 2376 | 2379 | 1 |
| 2376 | 2380 | 1 |
| 2377 | 2384 | 1 |
| 2377 | 2385 | 1 |
| 2377 | 2386 | 1 |
| 2378 | 2381 | 1 |
| 2378 | 2382 | 1 |
| 2378 | 2383 | 1 |
| 2379 | 2381 | 1 |
| 2379 | 2382 | 1 |
| 2379 | 2383 | 1 |
| 2380 | 2387 | 1 |
| 2380 | 2388 | 1 |
| 2380 | 2389 | 1 |
| 2381 | 2384 | 1 |
| 2381 | 2385 | 1 |
| 2381 | 2386 | 1 |
| 2382 | 2384 | 1 |
| 2382 | 2385 | 1 |
| 2382 | 2386 | 1 |
| 2383 | 2390 | 1 |
| 2383 | 2391 | 1 |
| 2383 | 2392 | 1 |
| 2384 | 2387 | 1 |
| 2384 | 2388 | 1 |
| 2384 | 2389 | 1 |
| 2385 | 2387 | 1 |
| 2385 | 2388 | 1 |
| 2385 | 2389 | 1 |
| 2386 | 2393 | 1 |
| 2386 | 2394 | 1 |
| 2386 | 2395 | 1 |
| 2387 | 2390 | 1 |
| 2387 | 2391 | 1 |
| 2387 | 2392 | 1 |
| 2388 | 2390 | 1 |
| 2388 | 2391 | 1 |
| 2388 | 2392 | 1 |
| 2390 | 2393 | 1 |
| 2390 | 2394 | 1 |
| 2390 | 2395 | 1 |
| 2391 | 2393 | 1 |
| 2391 | 2394 | 1 |
| 2391 | 2395 | 1 |
| 2396 | 2401 | 1 |
| 2396 | 2402 | 1 |

|      |      |   |
|------|------|---|
| 2396 | 2427 | 1 |
| 2396 | 2428 | 1 |
| 2396 | 2430 | 1 |
| 2396 | 2431 | 1 |
| 2396 | 2432 | 1 |
| 2397 | 2399 | 1 |
| 2397 | 2400 | 1 |
| 2397 | 2425 | 1 |
| 2397 | 2426 | 1 |
| 2397 | 2429 | 1 |
| 2398 | 2403 | 1 |
| 2398 | 2404 | 1 |
| 2398 | 2405 | 1 |
| 2398 | 2425 | 1 |
| 2398 | 2426 | 1 |
| 2398 | 2429 | 1 |
| 2399 | 2401 | 1 |
| 2399 | 2402 | 1 |
| 2399 | 2424 | 1 |
| 2400 | 2406 | 1 |
| 2400 | 2407 | 1 |
| 2400 | 2408 | 1 |
| 2400 | 2424 | 1 |
| 2401 | 2403 | 1 |
| 2401 | 2404 | 1 |
| 2401 | 2405 | 1 |
| 2402 | 2409 | 1 |
| 2402 | 2410 | 1 |
| 2402 | 2411 | 1 |
| 2403 | 2406 | 1 |
| 2403 | 2407 | 1 |
| 2403 | 2408 | 1 |
| 2404 | 2406 | 1 |
| 2404 | 2407 | 1 |
| 2404 | 2408 | 1 |
| 2405 | 2412 | 1 |
| 2405 | 2416 | 1 |
| 2405 | 2420 | 1 |
| 2406 | 2409 | 1 |
| 2406 | 2410 | 1 |
| 2406 | 2411 | 1 |
| 2407 | 2409 | 1 |
| 2407 | 2410 | 1 |
| 2407 | 2411 | 1 |
| 2408 | 2413 | 1 |
| 2408 | 2414 | 1 |
| 2408 | 2415 | 1 |
| 2408 | 2417 | 1 |
| 2408 | 2418 | 1 |
| 2408 | 2419 | 1 |
| 2408 | 2421 | 1 |
| 2408 | 2422 | 1 |
| 2408 | 2423 | 1 |
| 2409 | 2412 | 1 |

|      |      |   |
|------|------|---|
| 2409 | 2416 | 1 |
| 2409 | 2420 | 1 |
| 2410 | 2412 | 1 |
| 2410 | 2416 | 1 |
| 2410 | 2420 | 1 |
| 2412 | 2417 | 1 |
| 2412 | 2418 | 1 |
| 2412 | 2419 | 1 |
| 2412 | 2421 | 1 |
| 2412 | 2422 | 1 |
| 2412 | 2423 | 1 |
| 2413 | 2416 | 1 |
| 2413 | 2420 | 1 |
| 2414 | 2416 | 1 |
| 2414 | 2420 | 1 |
| 2415 | 2416 | 1 |
| 2415 | 2420 | 1 |
| 2416 | 2421 | 1 |
| 2416 | 2422 | 1 |
| 2416 | 2423 | 1 |
| 2417 | 2420 | 1 |
| 2418 | 2420 | 1 |
| 2419 | 2420 | 1 |
| 2424 | 2433 | 1 |
| 2424 | 2434 | 1 |
| 2424 | 2459 | 1 |
| 2425 | 2427 | 1 |
| 2425 | 2428 | 1 |
| 2425 | 2430 | 1 |
| 2425 | 2431 | 1 |
| 2425 | 2432 | 1 |
| 2426 | 2430 | 1 |
| 2426 | 2431 | 1 |
| 2426 | 2432 | 1 |
| 2427 | 2429 | 1 |
| 2428 | 2429 | 1 |
| 2429 | 2435 | 1 |
| 2429 | 2436 | 1 |
| 2429 | 2437 | 1 |
| 2429 | 2460 | 1 |
| 2429 | 2461 | 1 |
| 2429 | 2487 | 1 |
| 2430 | 2433 | 1 |
| 2430 | 2434 | 1 |
| 2430 | 2459 | 1 |
| 2431 | 2433 | 1 |
| 2431 | 2434 | 1 |
| 2431 | 2459 | 1 |
| 2432 | 2438 | 1 |
| 2432 | 2439 | 1 |
| 2432 | 2440 | 1 |
| 2432 | 2462 | 1 |
| 2432 | 2463 | 1 |
| 2432 | 2488 | 1 |

|      |      |   |
|------|------|---|
| 2432 | 2489 | 1 |
| 2432 | 2492 | 1 |
| 2433 | 2435 | 1 |
| 2433 | 2436 | 1 |
| 2433 | 2437 | 1 |
| 2433 | 2460 | 1 |
| 2433 | 2461 | 1 |
| 2433 | 2487 | 1 |
| 2434 | 2441 | 1 |
| 2434 | 2442 | 1 |
| 2434 | 2443 | 1 |
| 2434 | 2460 | 1 |
| 2434 | 2461 | 1 |
| 2434 | 2487 | 1 |
| 2435 | 2438 | 1 |
| 2435 | 2439 | 1 |
| 2435 | 2440 | 1 |
| 2435 | 2459 | 1 |
| 2436 | 2438 | 1 |
| 2436 | 2439 | 1 |
| 2436 | 2440 | 1 |
| 2436 | 2459 | 1 |
| 2437 | 2444 | 1 |
| 2437 | 2445 | 1 |
| 2437 | 2446 | 1 |
| 2437 | 2459 | 1 |
| 2438 | 2441 | 1 |
| 2438 | 2442 | 1 |
| 2438 | 2443 | 1 |
| 2439 | 2441 | 1 |
| 2439 | 2442 | 1 |
| 2439 | 2443 | 1 |
| 2440 | 2447 | 1 |
| 2440 | 2448 | 1 |
| 2440 | 2449 | 1 |
| 2441 | 2444 | 1 |
| 2441 | 2445 | 1 |
| 2441 | 2446 | 1 |
| 2442 | 2444 | 1 |
| 2442 | 2445 | 1 |
| 2442 | 2446 | 1 |
| 2443 | 2450 | 1 |
| 2443 | 2451 | 1 |
| 2443 | 2452 | 1 |
| 2444 | 2447 | 1 |
| 2444 | 2448 | 1 |
| 2444 | 2449 | 1 |
| 2445 | 2447 | 1 |
| 2445 | 2448 | 1 |
| 2445 | 2449 | 1 |
| 2446 | 2453 | 1 |
| 2446 | 2454 | 1 |
| 2446 | 2455 | 1 |
| 2447 | 2450 | 1 |

|      |      |   |
|------|------|---|
| 2447 | 2451 | 1 |
| 2447 | 2452 | 1 |
| 2448 | 2450 | 1 |
| 2448 | 2451 | 1 |
| 2448 | 2452 | 1 |
| 2449 | 2456 | 1 |
| 2449 | 2457 | 1 |
| 2449 | 2458 | 1 |
| 2450 | 2453 | 1 |
| 2450 | 2454 | 1 |
| 2450 | 2455 | 1 |
| 2451 | 2453 | 1 |
| 2451 | 2454 | 1 |
| 2451 | 2455 | 1 |
| 2453 | 2456 | 1 |
| 2453 | 2457 | 1 |
| 2453 | 2458 | 1 |
| 2454 | 2456 | 1 |
| 2454 | 2457 | 1 |
| 2454 | 2458 | 1 |
| 2459 | 2464 | 1 |
| 2459 | 2465 | 1 |
| 2459 | 2490 | 1 |
| 2459 | 2491 | 1 |
| 2459 | 2493 | 1 |
| 2459 | 2494 | 1 |
| 2459 | 2495 | 1 |
| 2460 | 2462 | 1 |
| 2460 | 2463 | 1 |
| 2460 | 2488 | 1 |
| 2460 | 2489 | 1 |
| 2460 | 2492 | 1 |
| 2461 | 2466 | 1 |
| 2461 | 2467 | 1 |
| 2461 | 2468 | 1 |
| 2461 | 2488 | 1 |
| 2461 | 2489 | 1 |
| 2461 | 2492 | 1 |
| 2462 | 2464 | 1 |
| 2462 | 2465 | 1 |
| 2462 | 2487 | 1 |
| 2463 | 2469 | 1 |
| 2463 | 2470 | 1 |
| 2463 | 2471 | 1 |
| 2463 | 2487 | 1 |
| 2464 | 2466 | 1 |
| 2464 | 2467 | 1 |
| 2464 | 2468 | 1 |
| 2465 | 2472 | 1 |
| 2465 | 2473 | 1 |
| 2465 | 2474 | 1 |
| 2466 | 2469 | 1 |
| 2466 | 2470 | 1 |
| 2466 | 2471 | 1 |

|      |      |   |
|------|------|---|
| 2467 | 2469 | 1 |
| 2467 | 2470 | 1 |
| 2467 | 2471 | 1 |
| 2468 | 2475 | 1 |
| 2468 | 2479 | 1 |
| 2468 | 2483 | 1 |
| 2469 | 2472 | 1 |
| 2469 | 2473 | 1 |
| 2469 | 2474 | 1 |
| 2470 | 2472 | 1 |
| 2470 | 2473 | 1 |
| 2470 | 2474 | 1 |
| 2471 | 2476 | 1 |
| 2471 | 2477 | 1 |
| 2471 | 2478 | 1 |
| 2471 | 2480 | 1 |
| 2471 | 2481 | 1 |
| 2471 | 2482 | 1 |
| 2471 | 2484 | 1 |
| 2471 | 2485 | 1 |
| 2471 | 2486 | 1 |
| 2472 | 2475 | 1 |
| 2472 | 2479 | 1 |
| 2472 | 2483 | 1 |
| 2473 | 2475 | 1 |
| 2473 | 2479 | 1 |
| 2473 | 2483 | 1 |
| 2475 | 2480 | 1 |
| 2475 | 2481 | 1 |
| 2475 | 2482 | 1 |
| 2475 | 2484 | 1 |
| 2475 | 2485 | 1 |
| 2475 | 2486 | 1 |
| 2476 | 2479 | 1 |
| 2476 | 2483 | 1 |
| 2477 | 2479 | 1 |
| 2477 | 2483 | 1 |
| 2478 | 2479 | 1 |
| 2478 | 2483 | 1 |
| 2479 | 2484 | 1 |
| 2479 | 2485 | 1 |
| 2479 | 2486 | 1 |
| 2480 | 2483 | 1 |
| 2481 | 2483 | 1 |
| 2482 | 2483 | 1 |
| 2487 | 2496 | 1 |
| 2487 | 2497 | 1 |
| 2487 | 2522 | 1 |
| 2488 | 2490 | 1 |
| 2488 | 2491 | 1 |
| 2488 | 2493 | 1 |
| 2488 | 2494 | 1 |
| 2488 | 2495 | 1 |
| 2489 | 2493 | 1 |

|      |      |   |
|------|------|---|
| 2489 | 2494 | 1 |
| 2489 | 2495 | 1 |
| 2490 | 2492 | 1 |
| 2491 | 2492 | 1 |
| 2492 | 2498 | 1 |
| 2492 | 2499 | 1 |
| 2492 | 2500 | 1 |
| 2492 | 2523 | 1 |
| 2492 | 2524 | 1 |
| 2492 | 2550 | 1 |
| 2493 | 2496 | 1 |
| 2493 | 2497 | 1 |
| 2493 | 2522 | 1 |
| 2494 | 2496 | 1 |
| 2494 | 2497 | 1 |
| 2494 | 2522 | 1 |
| 2495 | 2501 | 1 |
| 2495 | 2502 | 1 |
| 2495 | 2503 | 1 |
| 2495 | 2525 | 1 |
| 2495 | 2526 | 1 |
| 2495 | 2551 | 1 |
| 2495 | 2552 | 1 |
| 2495 | 2555 | 1 |
| 2496 | 2498 | 1 |
| 2496 | 2499 | 1 |
| 2496 | 2500 | 1 |
| 2496 | 2523 | 1 |
| 2496 | 2524 | 1 |
| 2496 | 2550 | 1 |
| 2497 | 2504 | 1 |
| 2497 | 2505 | 1 |
| 2497 | 2506 | 1 |
| 2497 | 2523 | 1 |
| 2497 | 2524 | 1 |
| 2497 | 2550 | 1 |
| 2498 | 2501 | 1 |
| 2498 | 2502 | 1 |
| 2498 | 2503 | 1 |
| 2498 | 2522 | 1 |
| 2499 | 2501 | 1 |
| 2499 | 2502 | 1 |
| 2499 | 2503 | 1 |
| 2499 | 2522 | 1 |
| 2500 | 2507 | 1 |
| 2500 | 2508 | 1 |
| 2500 | 2509 | 1 |
| 2500 | 2522 | 1 |
| 2501 | 2504 | 1 |
| 2501 | 2505 | 1 |
| 2501 | 2506 | 1 |
| 2502 | 2504 | 1 |
| 2502 | 2505 | 1 |
| 2502 | 2506 | 1 |

|      |      |   |
|------|------|---|
| 2503 | 2510 | 1 |
| 2503 | 2511 | 1 |
| 2503 | 2512 | 1 |
| 2504 | 2507 | 1 |
| 2504 | 2508 | 1 |
| 2504 | 2509 | 1 |
| 2505 | 2507 | 1 |
| 2505 | 2508 | 1 |
| 2505 | 2509 | 1 |
| 2506 | 2513 | 1 |
| 2506 | 2514 | 1 |
| 2506 | 2515 | 1 |
| 2507 | 2510 | 1 |
| 2507 | 2511 | 1 |
| 2507 | 2512 | 1 |
| 2508 | 2510 | 1 |
| 2508 | 2511 | 1 |
| 2508 | 2512 | 1 |
| 2509 | 2516 | 1 |
| 2509 | 2517 | 1 |
| 2509 | 2518 | 1 |
| 2510 | 2513 | 1 |
| 2510 | 2514 | 1 |
| 2510 | 2515 | 1 |
| 2511 | 2513 | 1 |
| 2511 | 2514 | 1 |
| 2511 | 2515 | 1 |
| 2512 | 2519 | 1 |
| 2512 | 2520 | 1 |
| 2512 | 2521 | 1 |
| 2513 | 2516 | 1 |
| 2513 | 2517 | 1 |
| 2513 | 2518 | 1 |
| 2514 | 2516 | 1 |
| 2514 | 2517 | 1 |
| 2514 | 2518 | 1 |
| 2516 | 2519 | 1 |
| 2516 | 2520 | 1 |
| 2516 | 2521 | 1 |
| 2517 | 2519 | 1 |
| 2517 | 2520 | 1 |
| 2517 | 2521 | 1 |
| 2522 | 2527 | 1 |
| 2522 | 2528 | 1 |
| 2522 | 2553 | 1 |
| 2522 | 2554 | 1 |
| 2522 | 2556 | 1 |
| 2522 | 2557 | 1 |
| 2522 | 2558 | 1 |
| 2523 | 2525 | 1 |
| 2523 | 2526 | 1 |
| 2523 | 2551 | 1 |
| 2523 | 2552 | 1 |
| 2523 | 2555 | 1 |



|      |      |   |
|------|------|---|
| 2524 | 2529 | 1 |
| 2524 | 2530 | 1 |
| 2524 | 2531 | 1 |
| 2524 | 2551 | 1 |
| 2524 | 2552 | 1 |
| 2524 | 2555 | 1 |
| 2525 | 2527 | 1 |
| 2525 | 2528 | 1 |
| 2525 | 2550 | 1 |
| 2526 | 2532 | 1 |
| 2526 | 2533 | 1 |
| 2526 | 2534 | 1 |
| 2526 | 2550 | 1 |
| 2527 | 2529 | 1 |
| 2527 | 2530 | 1 |
| 2527 | 2531 | 1 |
| 2528 | 2535 | 1 |
| 2528 | 2536 | 1 |
| 2528 | 2537 | 1 |
| 2529 | 2532 | 1 |
| 2529 | 2533 | 1 |
| 2529 | 2534 | 1 |
| 2530 | 2532 | 1 |
| 2530 | 2533 | 1 |
| 2530 | 2534 | 1 |
| 2531 | 2538 | 1 |
| 2531 | 2542 | 1 |
| 2531 | 2546 | 1 |
| 2532 | 2535 | 1 |
| 2532 | 2536 | 1 |
| 2532 | 2537 | 1 |
| 2533 | 2535 | 1 |
| 2533 | 2536 | 1 |
| 2533 | 2537 | 1 |
| 2534 | 2539 | 1 |
| 2534 | 2540 | 1 |
| 2534 | 2541 | 1 |
| 2534 | 2543 | 1 |
| 2534 | 2544 | 1 |
| 2534 | 2545 | 1 |
| 2534 | 2547 | 1 |
| 2534 | 2548 | 1 |
| 2534 | 2549 | 1 |
| 2535 | 2538 | 1 |
| 2535 | 2542 | 1 |
| 2535 | 2546 | 1 |
| 2536 | 2538 | 1 |
| 2536 | 2542 | 1 |
| 2536 | 2546 | 1 |
| 2538 | 2543 | 1 |
| 2538 | 2544 | 1 |
| 2538 | 2545 | 1 |
| 2538 | 2547 | 1 |
| 2538 | 2548 | 1 |

|      |      |   |
|------|------|---|
| 2538 | 2549 | 1 |
| 2539 | 2542 | 1 |
| 2539 | 2546 | 1 |
| 2540 | 2542 | 1 |
| 2540 | 2546 | 1 |
| 2541 | 2542 | 1 |
| 2541 | 2546 | 1 |
| 2542 | 2547 | 1 |
| 2542 | 2548 | 1 |
| 2542 | 2549 | 1 |
| 2543 | 2546 | 1 |
| 2544 | 2546 | 1 |
| 2545 | 2546 | 1 |
| 2550 | 2559 | 1 |
| 2550 | 2560 | 1 |
| 2550 | 2585 | 1 |
| 2551 | 2553 | 1 |
| 2551 | 2554 | 1 |
| 2551 | 2556 | 1 |
| 2551 | 2557 | 1 |
| 2551 | 2558 | 1 |
| 2552 | 2556 | 1 |
| 2552 | 2557 | 1 |
| 2552 | 2558 | 1 |
| 2553 | 2555 | 1 |
| 2554 | 2555 | 1 |
| 2555 | 2561 | 1 |
| 2555 | 2562 | 1 |
| 2555 | 2563 | 1 |
| 2555 | 2586 | 1 |
| 2555 | 2587 | 1 |
| 2555 | 2613 | 1 |
| 2556 | 2559 | 1 |
| 2556 | 2560 | 1 |
| 2556 | 2585 | 1 |
| 2557 | 2559 | 1 |
| 2557 | 2560 | 1 |
| 2557 | 2585 | 1 |
| 2558 | 2564 | 1 |
| 2558 | 2565 | 1 |
| 2558 | 2566 | 1 |
| 2558 | 2588 | 1 |
| 2558 | 2589 | 1 |
| 2558 | 2614 | 1 |
| 2558 | 2615 | 1 |
| 2558 | 2618 | 1 |
| 2559 | 2561 | 1 |
| 2559 | 2562 | 1 |
| 2559 | 2563 | 1 |
| 2559 | 2586 | 1 |
| 2559 | 2587 | 1 |
| 2559 | 2613 | 1 |
| 2560 | 2567 | 1 |
| 2560 | 2568 | 1 |

|      |      |   |
|------|------|---|
| 2560 | 2569 | 1 |
| 2560 | 2586 | 1 |
| 2560 | 2587 | 1 |
| 2560 | 2613 | 1 |
| 2561 | 2564 | 1 |
| 2561 | 2565 | 1 |
| 2561 | 2566 | 1 |
| 2561 | 2585 | 1 |
| 2562 | 2564 | 1 |
| 2562 | 2565 | 1 |
| 2562 | 2566 | 1 |
| 2562 | 2585 | 1 |
| 2563 | 2570 | 1 |
| 2563 | 2571 | 1 |
| 2563 | 2572 | 1 |
| 2563 | 2585 | 1 |
| 2564 | 2567 | 1 |
| 2564 | 2568 | 1 |
| 2564 | 2569 | 1 |
| 2565 | 2567 | 1 |
| 2565 | 2568 | 1 |
| 2565 | 2569 | 1 |
| 2566 | 2573 | 1 |
| 2566 | 2574 | 1 |
| 2566 | 2575 | 1 |
| 2567 | 2570 | 1 |
| 2567 | 2571 | 1 |
| 2567 | 2572 | 1 |
| 2568 | 2570 | 1 |
| 2568 | 2571 | 1 |
| 2568 | 2572 | 1 |
| 2569 | 2576 | 1 |
| 2569 | 2577 | 1 |
| 2569 | 2578 | 1 |
| 2570 | 2573 | 1 |
| 2570 | 2574 | 1 |
| 2570 | 2575 | 1 |
| 2571 | 2573 | 1 |
| 2571 | 2574 | 1 |
| 2571 | 2575 | 1 |
| 2572 | 2579 | 1 |
| 2572 | 2580 | 1 |
| 2572 | 2581 | 1 |
| 2573 | 2576 | 1 |
| 2573 | 2577 | 1 |
| 2573 | 2578 | 1 |
| 2574 | 2576 | 1 |
| 2574 | 2577 | 1 |
| 2574 | 2578 | 1 |
| 2575 | 2582 | 1 |
| 2575 | 2583 | 1 |
| 2575 | 2584 | 1 |
| 2576 | 2579 | 1 |
| 2576 | 2580 | 1 |

|      |      |   |
|------|------|---|
| 2576 | 2581 | 1 |
| 2577 | 2579 | 1 |
| 2577 | 2580 | 1 |
| 2577 | 2581 | 1 |
| 2579 | 2582 | 1 |
| 2579 | 2583 | 1 |
| 2579 | 2584 | 1 |
| 2580 | 2582 | 1 |
| 2580 | 2583 | 1 |
| 2580 | 2584 | 1 |
| 2585 | 2590 | 1 |
| 2585 | 2591 | 1 |
| 2585 | 2616 | 1 |
| 2585 | 2617 | 1 |
| 2585 | 2619 | 1 |
| 2585 | 2620 | 1 |
| 2585 | 2621 | 1 |
| 2586 | 2588 | 1 |
| 2586 | 2589 | 1 |
| 2586 | 2614 | 1 |
| 2586 | 2615 | 1 |
| 2586 | 2618 | 1 |
| 2587 | 2592 | 1 |
| 2587 | 2593 | 1 |
| 2587 | 2594 | 1 |
| 2587 | 2614 | 1 |
| 2587 | 2615 | 1 |
| 2587 | 2618 | 1 |
| 2588 | 2590 | 1 |
| 2588 | 2591 | 1 |
| 2588 | 2613 | 1 |
| 2589 | 2595 | 1 |
| 2589 | 2596 | 1 |
| 2589 | 2597 | 1 |
| 2589 | 2613 | 1 |
| 2590 | 2592 | 1 |
| 2590 | 2593 | 1 |
| 2590 | 2594 | 1 |
| 2591 | 2598 | 1 |
| 2591 | 2599 | 1 |
| 2591 | 2600 | 1 |
| 2592 | 2595 | 1 |
| 2592 | 2596 | 1 |
| 2592 | 2597 | 1 |
| 2593 | 2595 | 1 |
| 2593 | 2596 | 1 |
| 2593 | 2597 | 1 |
| 2594 | 2601 | 1 |
| 2594 | 2605 | 1 |
| 2594 | 2609 | 1 |
| 2595 | 2598 | 1 |
| 2595 | 2599 | 1 |
| 2595 | 2600 | 1 |
| 2596 | 2598 | 1 |

|      |      |   |
|------|------|---|
| 2596 | 2599 | 1 |
| 2596 | 2600 | 1 |
| 2597 | 2602 | 1 |
| 2597 | 2603 | 1 |
| 2597 | 2604 | 1 |
| 2597 | 2606 | 1 |
| 2597 | 2607 | 1 |
| 2597 | 2608 | 1 |
| 2597 | 2610 | 1 |
| 2597 | 2611 | 1 |
| 2597 | 2612 | 1 |
| 2598 | 2601 | 1 |
| 2598 | 2605 | 1 |
| 2598 | 2609 | 1 |
| 2599 | 2601 | 1 |
| 2599 | 2605 | 1 |
| 2599 | 2609 | 1 |
| 2601 | 2606 | 1 |
| 2601 | 2607 | 1 |
| 2601 | 2608 | 1 |
| 2601 | 2610 | 1 |
| 2601 | 2611 | 1 |
| 2601 | 2612 | 1 |
| 2602 | 2605 | 1 |
| 2602 | 2609 | 1 |
| 2603 | 2605 | 1 |
| 2603 | 2609 | 1 |
| 2604 | 2605 | 1 |
| 2604 | 2609 | 1 |
| 2605 | 2610 | 1 |
| 2605 | 2611 | 1 |
| 2605 | 2612 | 1 |
| 2606 | 2609 | 1 |
| 2607 | 2609 | 1 |
| 2608 | 2609 | 1 |
| 2613 | 2622 | 1 |
| 2613 | 2623 | 1 |
| 2613 | 2648 | 1 |
| 2614 | 2616 | 1 |
| 2614 | 2617 | 1 |
| 2614 | 2619 | 1 |
| 2614 | 2620 | 1 |
| 2614 | 2621 | 1 |
| 2615 | 2619 | 1 |
| 2615 | 2620 | 1 |
| 2615 | 2621 | 1 |
| 2616 | 2618 | 1 |
| 2617 | 2618 | 1 |
| 2618 | 2624 | 1 |
| 2618 | 2625 | 1 |
| 2618 | 2626 | 1 |
| 2618 | 2649 | 1 |
| 2618 | 2650 | 1 |
| 2618 | 2676 | 1 |

|      |      |   |
|------|------|---|
| 2619 | 2622 | 1 |
| 2619 | 2623 | 1 |
| 2619 | 2648 | 1 |
| 2620 | 2622 | 1 |
| 2620 | 2623 | 1 |
| 2620 | 2648 | 1 |
| 2621 | 2627 | 1 |
| 2621 | 2628 | 1 |
| 2621 | 2629 | 1 |
| 2621 | 2651 | 1 |
| 2621 | 2652 | 1 |
| 2621 | 2677 | 1 |
| 2621 | 2678 | 1 |
| 2621 | 2681 | 1 |
| 2622 | 2624 | 1 |
| 2622 | 2625 | 1 |
| 2622 | 2626 | 1 |
| 2622 | 2649 | 1 |
| 2622 | 2650 | 1 |
| 2622 | 2676 | 1 |
| 2623 | 2630 | 1 |
| 2623 | 2631 | 1 |
| 2623 | 2632 | 1 |
| 2623 | 2649 | 1 |
| 2623 | 2650 | 1 |
| 2623 | 2676 | 1 |
| 2624 | 2627 | 1 |
| 2624 | 2628 | 1 |
| 2624 | 2629 | 1 |
| 2624 | 2648 | 1 |
| 2625 | 2627 | 1 |
| 2625 | 2628 | 1 |
| 2625 | 2629 | 1 |
| 2625 | 2648 | 1 |
| 2626 | 2633 | 1 |
| 2626 | 2634 | 1 |
| 2626 | 2635 | 1 |
| 2626 | 2648 | 1 |
| 2627 | 2630 | 1 |
| 2627 | 2631 | 1 |
| 2627 | 2632 | 1 |
| 2628 | 2630 | 1 |
| 2628 | 2631 | 1 |
| 2628 | 2632 | 1 |
| 2629 | 2636 | 1 |
| 2629 | 2637 | 1 |
| 2629 | 2638 | 1 |
| 2630 | 2633 | 1 |
| 2630 | 2634 | 1 |
| 2630 | 2635 | 1 |
| 2631 | 2633 | 1 |
| 2631 | 2634 | 1 |
| 2631 | 2635 | 1 |
| 2632 | 2639 | 1 |

|      |      |   |
|------|------|---|
| 2632 | 2640 | 1 |
| 2632 | 2641 | 1 |
| 2633 | 2636 | 1 |
| 2633 | 2637 | 1 |
| 2633 | 2638 | 1 |
| 2634 | 2636 | 1 |
| 2634 | 2637 | 1 |
| 2634 | 2638 | 1 |
| 2635 | 2642 | 1 |
| 2635 | 2643 | 1 |
| 2635 | 2644 | 1 |
| 2636 | 2639 | 1 |
| 2636 | 2640 | 1 |
| 2636 | 2641 | 1 |
| 2637 | 2639 | 1 |
| 2637 | 2640 | 1 |
| 2637 | 2641 | 1 |
| 2638 | 2645 | 1 |
| 2638 | 2646 | 1 |
| 2638 | 2647 | 1 |
| 2639 | 2642 | 1 |
| 2639 | 2643 | 1 |
| 2639 | 2644 | 1 |
| 2640 | 2642 | 1 |
| 2640 | 2643 | 1 |
| 2640 | 2644 | 1 |
| 2642 | 2645 | 1 |
| 2642 | 2646 | 1 |
| 2642 | 2647 | 1 |
| 2643 | 2645 | 1 |
| 2643 | 2646 | 1 |
| 2643 | 2647 | 1 |
| 2648 | 2653 | 1 |
| 2648 | 2654 | 1 |
| 2648 | 2679 | 1 |
| 2648 | 2680 | 1 |
| 2648 | 2682 | 1 |
| 2648 | 2683 | 1 |
| 2648 | 2684 | 1 |
| 2649 | 2651 | 1 |
| 2649 | 2652 | 1 |
| 2649 | 2677 | 1 |
| 2649 | 2678 | 1 |
| 2649 | 2681 | 1 |
| 2650 | 2655 | 1 |
| 2650 | 2656 | 1 |
| 2650 | 2657 | 1 |
| 2650 | 2677 | 1 |
| 2650 | 2678 | 1 |
| 2650 | 2681 | 1 |
| 2651 | 2653 | 1 |
| 2651 | 2654 | 1 |
| 2651 | 2676 | 1 |
| 2652 | 2658 | 1 |

|      |      |   |
|------|------|---|
| 2652 | 2659 | 1 |
| 2652 | 2660 | 1 |
| 2652 | 2676 | 1 |
| 2653 | 2655 | 1 |
| 2653 | 2656 | 1 |
| 2653 | 2657 | 1 |
| 2654 | 2661 | 1 |
| 2654 | 2662 | 1 |
| 2654 | 2663 | 1 |
| 2655 | 2658 | 1 |
| 2655 | 2659 | 1 |
| 2655 | 2660 | 1 |
| 2656 | 2658 | 1 |
| 2656 | 2659 | 1 |
| 2656 | 2660 | 1 |
| 2657 | 2664 | 1 |
| 2657 | 2668 | 1 |
| 2657 | 2672 | 1 |
| 2658 | 2661 | 1 |
| 2658 | 2662 | 1 |
| 2658 | 2663 | 1 |
| 2659 | 2661 | 1 |
| 2659 | 2662 | 1 |
| 2659 | 2663 | 1 |
| 2660 | 2665 | 1 |
| 2660 | 2666 | 1 |
| 2660 | 2667 | 1 |
| 2660 | 2669 | 1 |
| 2660 | 2670 | 1 |
| 2660 | 2671 | 1 |
| 2660 | 2673 | 1 |
| 2660 | 2674 | 1 |
| 2660 | 2675 | 1 |
| 2661 | 2664 | 1 |
| 2661 | 2668 | 1 |
| 2661 | 2672 | 1 |
| 2662 | 2664 | 1 |
| 2662 | 2668 | 1 |
| 2662 | 2672 | 1 |
| 2664 | 2669 | 1 |
| 2664 | 2670 | 1 |
| 2664 | 2671 | 1 |
| 2664 | 2673 | 1 |
| 2664 | 2674 | 1 |
| 2664 | 2675 | 1 |
| 2665 | 2668 | 1 |
| 2665 | 2672 | 1 |
| 2666 | 2668 | 1 |
| 2666 | 2672 | 1 |
| 2667 | 2668 | 1 |
| 2667 | 2672 | 1 |
| 2668 | 2673 | 1 |
| 2668 | 2674 | 1 |
| 2668 | 2675 | 1 |



|      |      |   |
|------|------|---|
| 2669 | 2672 | 1 |
| 2670 | 2672 | 1 |
| 2671 | 2672 | 1 |
| 2676 | 2685 | 1 |
| 2676 | 2686 | 1 |
| 2676 | 2711 | 1 |
| 2677 | 2679 | 1 |
| 2677 | 2680 | 1 |
| 2677 | 2682 | 1 |
| 2677 | 2683 | 1 |
| 2677 | 2684 | 1 |
| 2678 | 2682 | 1 |
| 2678 | 2683 | 1 |
| 2678 | 2684 | 1 |
| 2679 | 2681 | 1 |
| 2680 | 2681 | 1 |
| 2681 | 2687 | 1 |
| 2681 | 2688 | 1 |
| 2681 | 2689 | 1 |
| 2681 | 2712 | 1 |
| 2681 | 2713 | 1 |
| 2681 | 2739 | 1 |
| 2682 | 2685 | 1 |
| 2682 | 2686 | 1 |
| 2682 | 2711 | 1 |
| 2683 | 2685 | 1 |
| 2683 | 2686 | 1 |
| 2683 | 2711 | 1 |
| 2684 | 2690 | 1 |
| 2684 | 2691 | 1 |
| 2684 | 2692 | 1 |
| 2684 | 2714 | 1 |
| 2684 | 2715 | 1 |
| 2684 | 2740 | 1 |
| 2684 | 2741 | 1 |
| 2684 | 2744 | 1 |
| 2685 | 2687 | 1 |
| 2685 | 2688 | 1 |
| 2685 | 2689 | 1 |
| 2685 | 2712 | 1 |
| 2685 | 2713 | 1 |
| 2685 | 2739 | 1 |
| 2686 | 2693 | 1 |
| 2686 | 2694 | 1 |
| 2686 | 2695 | 1 |
| 2686 | 2712 | 1 |
| 2686 | 2713 | 1 |
| 2686 | 2739 | 1 |
| 2687 | 2690 | 1 |
| 2687 | 2691 | 1 |
| 2687 | 2692 | 1 |
| 2687 | 2711 | 1 |
| 2688 | 2690 | 1 |
| 2688 | 2691 | 1 |

|      |      |   |
|------|------|---|
| 2688 | 2692 | 1 |
| 2688 | 2711 | 1 |
| 2689 | 2696 | 1 |
| 2689 | 2697 | 1 |
| 2689 | 2698 | 1 |
| 2689 | 2711 | 1 |
| 2690 | 2693 | 1 |
| 2690 | 2694 | 1 |
| 2690 | 2695 | 1 |
| 2691 | 2693 | 1 |
| 2691 | 2694 | 1 |
| 2691 | 2695 | 1 |
| 2692 | 2699 | 1 |
| 2692 | 2700 | 1 |
| 2692 | 2701 | 1 |
| 2693 | 2696 | 1 |
| 2693 | 2697 | 1 |
| 2693 | 2698 | 1 |
| 2694 | 2696 | 1 |
| 2694 | 2697 | 1 |
| 2694 | 2698 | 1 |
| 2695 | 2702 | 1 |
| 2695 | 2703 | 1 |
| 2695 | 2704 | 1 |
| 2696 | 2699 | 1 |
| 2696 | 2700 | 1 |
| 2696 | 2701 | 1 |
| 2697 | 2699 | 1 |
| 2697 | 2700 | 1 |
| 2697 | 2701 | 1 |
| 2698 | 2705 | 1 |
| 2698 | 2706 | 1 |
| 2698 | 2707 | 1 |
| 2699 | 2702 | 1 |
| 2699 | 2703 | 1 |
| 2699 | 2704 | 1 |
| 2700 | 2702 | 1 |
| 2700 | 2703 | 1 |
| 2700 | 2704 | 1 |
| 2701 | 2708 | 1 |
| 2701 | 2709 | 1 |
| 2701 | 2710 | 1 |
| 2702 | 2705 | 1 |
| 2702 | 2706 | 1 |
| 2702 | 2707 | 1 |
| 2703 | 2705 | 1 |
| 2703 | 2706 | 1 |
| 2703 | 2707 | 1 |
| 2705 | 2708 | 1 |
| 2705 | 2709 | 1 |
| 2705 | 2710 | 1 |
| 2706 | 2708 | 1 |
| 2706 | 2709 | 1 |
| 2706 | 2710 | 1 |

|      |      |   |
|------|------|---|
| 2711 | 2716 | 1 |
| 2711 | 2717 | 1 |
| 2711 | 2742 | 1 |
| 2711 | 2743 | 1 |
| 2711 | 2745 | 1 |
| 2711 | 2746 | 1 |
| 2711 | 2747 | 1 |
| 2712 | 2714 | 1 |
| 2712 | 2715 | 1 |
| 2712 | 2740 | 1 |
| 2712 | 2741 | 1 |
| 2712 | 2744 | 1 |
| 2713 | 2718 | 1 |
| 2713 | 2719 | 1 |
| 2713 | 2720 | 1 |
| 2713 | 2740 | 1 |
| 2713 | 2741 | 1 |
| 2713 | 2744 | 1 |
| 2714 | 2716 | 1 |
| 2714 | 2717 | 1 |
| 2714 | 2739 | 1 |
| 2715 | 2721 | 1 |
| 2715 | 2722 | 1 |
| 2715 | 2723 | 1 |
| 2715 | 2739 | 1 |
| 2716 | 2718 | 1 |
| 2716 | 2719 | 1 |
| 2716 | 2720 | 1 |
| 2717 | 2724 | 1 |
| 2717 | 2725 | 1 |
| 2717 | 2726 | 1 |
| 2718 | 2721 | 1 |
| 2718 | 2722 | 1 |
| 2718 | 2723 | 1 |
| 2719 | 2721 | 1 |
| 2719 | 2722 | 1 |
| 2719 | 2723 | 1 |
| 2720 | 2727 | 1 |
| 2720 | 2731 | 1 |
| 2720 | 2735 | 1 |
| 2721 | 2724 | 1 |
| 2721 | 2725 | 1 |
| 2721 | 2726 | 1 |
| 2722 | 2724 | 1 |
| 2722 | 2725 | 1 |
| 2722 | 2726 | 1 |
| 2723 | 2728 | 1 |
| 2723 | 2729 | 1 |
| 2723 | 2730 | 1 |
| 2723 | 2732 | 1 |
| 2723 | 2733 | 1 |
| 2723 | 2734 | 1 |
| 2723 | 2736 | 1 |
| 2723 | 2737 | 1 |

|      |      |   |
|------|------|---|
| 2723 | 2738 | 1 |
| 2724 | 2727 | 1 |
| 2724 | 2731 | 1 |
| 2724 | 2735 | 1 |
| 2725 | 2727 | 1 |
| 2725 | 2731 | 1 |
| 2725 | 2735 | 1 |
| 2727 | 2732 | 1 |
| 2727 | 2733 | 1 |
| 2727 | 2734 | 1 |
| 2727 | 2736 | 1 |
| 2727 | 2737 | 1 |
| 2727 | 2738 | 1 |
| 2728 | 2731 | 1 |
| 2728 | 2735 | 1 |
| 2729 | 2731 | 1 |
| 2729 | 2735 | 1 |
| 2730 | 2731 | 1 |
| 2730 | 2735 | 1 |
| 2731 | 2736 | 1 |
| 2731 | 2737 | 1 |
| 2731 | 2738 | 1 |
| 2732 | 2735 | 1 |
| 2733 | 2735 | 1 |
| 2734 | 2735 | 1 |
| 2739 | 2748 | 1 |
| 2739 | 2749 | 1 |
| 2739 | 2774 | 1 |
| 2740 | 2742 | 1 |
| 2740 | 2743 | 1 |
| 2740 | 2745 | 1 |
| 2740 | 2746 | 1 |
| 2740 | 2747 | 1 |
| 2741 | 2745 | 1 |
| 2741 | 2746 | 1 |
| 2741 | 2747 | 1 |
| 2742 | 2744 | 1 |
| 2743 | 2744 | 1 |
| 2744 | 2750 | 1 |
| 2744 | 2751 | 1 |
| 2744 | 2752 | 1 |
| 2744 | 2775 | 1 |
| 2744 | 2776 | 1 |
| 2744 | 2802 | 1 |
| 2745 | 2748 | 1 |
| 2745 | 2749 | 1 |
| 2745 | 2774 | 1 |
| 2746 | 2748 | 1 |
| 2746 | 2749 | 1 |
| 2746 | 2774 | 1 |
| 2747 | 2753 | 1 |
| 2747 | 2754 | 1 |
| 2747 | 2755 | 1 |
| 2747 | 2777 | 1 |

|      |      |   |
|------|------|---|
| 2747 | 2778 | 1 |
| 2747 | 2803 | 1 |
| 2747 | 2804 | 1 |
| 2747 | 2807 | 1 |
| 2748 | 2750 | 1 |
| 2748 | 2751 | 1 |
| 2748 | 2752 | 1 |
| 2748 | 2775 | 1 |
| 2748 | 2776 | 1 |
| 2748 | 2802 | 1 |
| 2749 | 2756 | 1 |
| 2749 | 2757 | 1 |
| 2749 | 2758 | 1 |
| 2749 | 2775 | 1 |
| 2749 | 2776 | 1 |
| 2749 | 2802 | 1 |
| 2750 | 2753 | 1 |
| 2750 | 2754 | 1 |
| 2750 | 2755 | 1 |
| 2750 | 2774 | 1 |
| 2751 | 2753 | 1 |
| 2751 | 2754 | 1 |
| 2751 | 2755 | 1 |
| 2751 | 2774 | 1 |
| 2752 | 2759 | 1 |
| 2752 | 2760 | 1 |
| 2752 | 2761 | 1 |
| 2752 | 2774 | 1 |
| 2753 | 2756 | 1 |
| 2753 | 2757 | 1 |
| 2753 | 2758 | 1 |
| 2754 | 2756 | 1 |
| 2754 | 2757 | 1 |
| 2754 | 2758 | 1 |
| 2755 | 2762 | 1 |
| 2755 | 2763 | 1 |
| 2755 | 2764 | 1 |
| 2756 | 2759 | 1 |
| 2756 | 2760 | 1 |
| 2756 | 2761 | 1 |
| 2757 | 2759 | 1 |
| 2757 | 2760 | 1 |
| 2757 | 2761 | 1 |
| 2758 | 2765 | 1 |
| 2758 | 2766 | 1 |
| 2758 | 2767 | 1 |
| 2759 | 2762 | 1 |
| 2759 | 2763 | 1 |
| 2759 | 2764 | 1 |
| 2760 | 2762 | 1 |
| 2760 | 2763 | 1 |
| 2760 | 2764 | 1 |
| 2761 | 2768 | 1 |
| 2761 | 2769 | 1 |

|      |      |   |
|------|------|---|
| 2761 | 2770 | 1 |
| 2762 | 2765 | 1 |
| 2762 | 2766 | 1 |
| 2762 | 2767 | 1 |
| 2763 | 2765 | 1 |
| 2763 | 2766 | 1 |
| 2763 | 2767 | 1 |
| 2764 | 2771 | 1 |
| 2764 | 2772 | 1 |
| 2764 | 2773 | 1 |
| 2765 | 2768 | 1 |
| 2765 | 2769 | 1 |
| 2765 | 2770 | 1 |
| 2766 | 2768 | 1 |
| 2766 | 2769 | 1 |
| 2766 | 2770 | 1 |
| 2768 | 2771 | 1 |
| 2768 | 2772 | 1 |
| 2768 | 2773 | 1 |
| 2769 | 2771 | 1 |
| 2769 | 2772 | 1 |
| 2769 | 2773 | 1 |
| 2774 | 2779 | 1 |
| 2774 | 2780 | 1 |
| 2774 | 2805 | 1 |
| 2774 | 2806 | 1 |
| 2774 | 2808 | 1 |
| 2774 | 2809 | 1 |
| 2774 | 2810 | 1 |
| 2775 | 2777 | 1 |
| 2775 | 2778 | 1 |
| 2775 | 2803 | 1 |
| 2775 | 2804 | 1 |
| 2775 | 2807 | 1 |
| 2776 | 2781 | 1 |
| 2776 | 2782 | 1 |
| 2776 | 2783 | 1 |
| 2776 | 2803 | 1 |
| 2776 | 2804 | 1 |
| 2776 | 2807 | 1 |
| 2777 | 2779 | 1 |
| 2777 | 2780 | 1 |
| 2777 | 2802 | 1 |
| 2778 | 2784 | 1 |
| 2778 | 2785 | 1 |
| 2778 | 2786 | 1 |
| 2778 | 2802 | 1 |
| 2779 | 2781 | 1 |
| 2779 | 2782 | 1 |
| 2779 | 2783 | 1 |
| 2780 | 2787 | 1 |
| 2780 | 2788 | 1 |
| 2780 | 2789 | 1 |
| 2781 | 2784 | 1 |

|      |      |   |
|------|------|---|
| 2781 | 2785 | 1 |
| 2781 | 2786 | 1 |
| 2782 | 2784 | 1 |
| 2782 | 2785 | 1 |
| 2782 | 2786 | 1 |
| 2783 | 2790 | 1 |
| 2783 | 2794 | 1 |
| 2783 | 2798 | 1 |
| 2784 | 2787 | 1 |
| 2784 | 2788 | 1 |
| 2784 | 2789 | 1 |
| 2785 | 2787 | 1 |
| 2785 | 2788 | 1 |
| 2785 | 2789 | 1 |
| 2786 | 2791 | 1 |
| 2786 | 2792 | 1 |
| 2786 | 2793 | 1 |
| 2786 | 2795 | 1 |
| 2786 | 2796 | 1 |
| 2786 | 2797 | 1 |
| 2786 | 2799 | 1 |
| 2786 | 2800 | 1 |
| 2786 | 2801 | 1 |
| 2787 | 2790 | 1 |
| 2787 | 2794 | 1 |
| 2787 | 2798 | 1 |
| 2788 | 2790 | 1 |
| 2788 | 2794 | 1 |
| 2788 | 2798 | 1 |
| 2790 | 2795 | 1 |
| 2790 | 2796 | 1 |
| 2790 | 2797 | 1 |
| 2790 | 2799 | 1 |
| 2790 | 2800 | 1 |
| 2790 | 2801 | 1 |
| 2791 | 2794 | 1 |
| 2791 | 2798 | 1 |
| 2792 | 2794 | 1 |
| 2792 | 2798 | 1 |
| 2793 | 2794 | 1 |
| 2793 | 2798 | 1 |
| 2794 | 2799 | 1 |
| 2794 | 2800 | 1 |
| 2794 | 2801 | 1 |
| 2795 | 2798 | 1 |
| 2796 | 2798 | 1 |
| 2797 | 2798 | 1 |
| 2802 | 2811 | 1 |
| 2802 | 2812 | 1 |
| 2802 | 2837 | 1 |
| 2803 | 2805 | 1 |
| 2803 | 2806 | 1 |
| 2803 | 2808 | 1 |
| 2803 | 2809 | 1 |

|      |      |   |
|------|------|---|
| 2803 | 2810 | 1 |
| 2804 | 2808 | 1 |
| 2804 | 2809 | 1 |
| 2804 | 2810 | 1 |
| 2805 | 2807 | 1 |
| 2806 | 2807 | 1 |
| 2807 | 2813 | 1 |
| 2807 | 2814 | 1 |
| 2807 | 2815 | 1 |
| 2807 | 2838 | 1 |
| 2807 | 2839 | 1 |
| 2807 | 2865 | 1 |
| 2808 | 2811 | 1 |
| 2808 | 2812 | 1 |
| 2808 | 2837 | 1 |
| 2809 | 2811 | 1 |
| 2809 | 2812 | 1 |
| 2809 | 2837 | 1 |
| 2810 | 2816 | 1 |
| 2810 | 2817 | 1 |
| 2810 | 2818 | 1 |
| 2810 | 2840 | 1 |
| 2810 | 2841 | 1 |
| 2810 | 2866 | 1 |
| 2810 | 2867 | 1 |
| 2810 | 2870 | 1 |
| 2811 | 2813 | 1 |
| 2811 | 2814 | 1 |
| 2811 | 2815 | 1 |
| 2811 | 2838 | 1 |
| 2811 | 2839 | 1 |
| 2811 | 2865 | 1 |
| 2812 | 2819 | 1 |
| 2812 | 2820 | 1 |
| 2812 | 2821 | 1 |
| 2812 | 2838 | 1 |
| 2812 | 2839 | 1 |
| 2812 | 2865 | 1 |
| 2813 | 2816 | 1 |
| 2813 | 2817 | 1 |
| 2813 | 2818 | 1 |
| 2813 | 2837 | 1 |
| 2814 | 2816 | 1 |
| 2814 | 2817 | 1 |
| 2814 | 2818 | 1 |
| 2814 | 2837 | 1 |
| 2815 | 2822 | 1 |
| 2815 | 2823 | 1 |
| 2815 | 2824 | 1 |
| 2815 | 2837 | 1 |
| 2816 | 2819 | 1 |
| 2816 | 2820 | 1 |
| 2816 | 2821 | 1 |
| 2817 | 2819 | 1 |



|      |      |   |
|------|------|---|
| 2817 | 2820 | 1 |
| 2817 | 2821 | 1 |
| 2818 | 2825 | 1 |
| 2818 | 2826 | 1 |
| 2818 | 2827 | 1 |
| 2819 | 2822 | 1 |
| 2819 | 2823 | 1 |
| 2819 | 2824 | 1 |
| 2820 | 2822 | 1 |
| 2820 | 2823 | 1 |
| 2820 | 2824 | 1 |
| 2821 | 2828 | 1 |
| 2821 | 2829 | 1 |
| 2821 | 2830 | 1 |
| 2822 | 2825 | 1 |
| 2822 | 2826 | 1 |
| 2822 | 2827 | 1 |
| 2823 | 2825 | 1 |
| 2823 | 2826 | 1 |
| 2823 | 2827 | 1 |
| 2824 | 2831 | 1 |
| 2824 | 2832 | 1 |
| 2824 | 2833 | 1 |
| 2825 | 2828 | 1 |
| 2825 | 2829 | 1 |
| 2825 | 2830 | 1 |
| 2826 | 2828 | 1 |
| 2826 | 2829 | 1 |
| 2826 | 2830 | 1 |
| 2827 | 2834 | 1 |
| 2827 | 2835 | 1 |
| 2827 | 2836 | 1 |
| 2828 | 2831 | 1 |
| 2828 | 2832 | 1 |
| 2828 | 2833 | 1 |
| 2829 | 2831 | 1 |
| 2829 | 2832 | 1 |
| 2829 | 2833 | 1 |
| 2831 | 2834 | 1 |
| 2831 | 2835 | 1 |
| 2831 | 2836 | 1 |
| 2832 | 2834 | 1 |
| 2832 | 2835 | 1 |
| 2832 | 2836 | 1 |
| 2837 | 2842 | 1 |
| 2837 | 2843 | 1 |
| 2837 | 2868 | 1 |
| 2837 | 2869 | 1 |
| 2837 | 2871 | 1 |
| 2837 | 2872 | 1 |
| 2837 | 2873 | 1 |
| 2838 | 2840 | 1 |
| 2838 | 2841 | 1 |
| 2838 | 2866 | 1 |

|      |      |   |
|------|------|---|
| 2838 | 2867 | 1 |
| 2838 | 2870 | 1 |
| 2839 | 2844 | 1 |
| 2839 | 2845 | 1 |
| 2839 | 2846 | 1 |
| 2839 | 2866 | 1 |
| 2839 | 2867 | 1 |
| 2839 | 2870 | 1 |
| 2840 | 2842 | 1 |
| 2840 | 2843 | 1 |
| 2840 | 2865 | 1 |
| 2841 | 2847 | 1 |
| 2841 | 2848 | 1 |
| 2841 | 2849 | 1 |
| 2841 | 2865 | 1 |
| 2842 | 2844 | 1 |
| 2842 | 2845 | 1 |
| 2842 | 2846 | 1 |
| 2843 | 2850 | 1 |
| 2843 | 2851 | 1 |
| 2843 | 2852 | 1 |
| 2844 | 2847 | 1 |
| 2844 | 2848 | 1 |
| 2844 | 2849 | 1 |
| 2845 | 2847 | 1 |
| 2845 | 2848 | 1 |
| 2845 | 2849 | 1 |
| 2846 | 2853 | 1 |
| 2846 | 2857 | 1 |
| 2846 | 2861 | 1 |
| 2847 | 2850 | 1 |
| 2847 | 2851 | 1 |
| 2847 | 2852 | 1 |
| 2848 | 2850 | 1 |
| 2848 | 2851 | 1 |
| 2848 | 2852 | 1 |
| 2849 | 2854 | 1 |
| 2849 | 2855 | 1 |
| 2849 | 2856 | 1 |
| 2849 | 2858 | 1 |
| 2849 | 2859 | 1 |
| 2849 | 2860 | 1 |
| 2849 | 2862 | 1 |
| 2849 | 2863 | 1 |
| 2849 | 2864 | 1 |
| 2850 | 2853 | 1 |
| 2850 | 2857 | 1 |
| 2850 | 2861 | 1 |
| 2851 | 2853 | 1 |
| 2851 | 2857 | 1 |
| 2851 | 2861 | 1 |
| 2853 | 2858 | 1 |
| 2853 | 2859 | 1 |
| 2853 | 2860 | 1 |

|      |      |   |
|------|------|---|
| 2853 | 2862 | 1 |
| 2853 | 2863 | 1 |
| 2853 | 2864 | 1 |
| 2854 | 2857 | 1 |
| 2854 | 2861 | 1 |
| 2855 | 2857 | 1 |
| 2855 | 2861 | 1 |
| 2856 | 2857 | 1 |
| 2856 | 2861 | 1 |
| 2857 | 2862 | 1 |
| 2857 | 2863 | 1 |
| 2857 | 2864 | 1 |
| 2858 | 2861 | 1 |
| 2859 | 2861 | 1 |
| 2860 | 2861 | 1 |
| 2865 | 2874 | 1 |
| 2865 | 2875 | 1 |
| 2865 | 2900 | 1 |
| 2866 | 2868 | 1 |
| 2866 | 2869 | 1 |
| 2866 | 2871 | 1 |
| 2866 | 2872 | 1 |
| 2866 | 2873 | 1 |
| 2867 | 2871 | 1 |
| 2867 | 2872 | 1 |
| 2867 | 2873 | 1 |
| 2868 | 2870 | 1 |
| 2869 | 2870 | 1 |
| 2870 | 2876 | 1 |
| 2870 | 2877 | 1 |
| 2870 | 2878 | 1 |
| 2870 | 2901 | 1 |
| 2870 | 2902 | 1 |
| 2870 | 2928 | 1 |
| 2871 | 2874 | 1 |
| 2871 | 2875 | 1 |
| 2871 | 2900 | 1 |
| 2872 | 2874 | 1 |
| 2872 | 2875 | 1 |
| 2872 | 2900 | 1 |
| 2873 | 2879 | 1 |
| 2873 | 2880 | 1 |
| 2873 | 2881 | 1 |
| 2873 | 2903 | 1 |
| 2873 | 2904 | 1 |
| 2873 | 2929 | 1 |
| 2873 | 2930 | 1 |
| 2873 | 2933 | 1 |
| 2874 | 2876 | 1 |
| 2874 | 2877 | 1 |
| 2874 | 2878 | 1 |
| 2874 | 2901 | 1 |
| 2874 | 2902 | 1 |
| 2874 | 2928 | 1 |

|      |      |   |
|------|------|---|
| 2875 | 2882 | 1 |
| 2875 | 2883 | 1 |
| 2875 | 2884 | 1 |
| 2875 | 2901 | 1 |
| 2875 | 2902 | 1 |
| 2875 | 2928 | 1 |
| 2876 | 2879 | 1 |
| 2876 | 2880 | 1 |
| 2876 | 2881 | 1 |
| 2876 | 2900 | 1 |
| 2877 | 2879 | 1 |
| 2877 | 2880 | 1 |
| 2877 | 2881 | 1 |
| 2877 | 2900 | 1 |
| 2878 | 2885 | 1 |
| 2878 | 2886 | 1 |
| 2878 | 2887 | 1 |
| 2878 | 2900 | 1 |
| 2879 | 2882 | 1 |
| 2879 | 2883 | 1 |
| 2879 | 2884 | 1 |
| 2880 | 2882 | 1 |
| 2880 | 2883 | 1 |
| 2880 | 2884 | 1 |
| 2881 | 2888 | 1 |
| 2881 | 2889 | 1 |
| 2881 | 2890 | 1 |
| 2882 | 2885 | 1 |
| 2882 | 2886 | 1 |
| 2882 | 2887 | 1 |
| 2883 | 2885 | 1 |
| 2883 | 2886 | 1 |
| 2883 | 2887 | 1 |
| 2884 | 2891 | 1 |
| 2884 | 2892 | 1 |
| 2884 | 2893 | 1 |
| 2885 | 2888 | 1 |
| 2885 | 2889 | 1 |
| 2885 | 2890 | 1 |
| 2886 | 2888 | 1 |
| 2886 | 2889 | 1 |
| 2886 | 2890 | 1 |
| 2887 | 2894 | 1 |
| 2887 | 2895 | 1 |
| 2887 | 2896 | 1 |
| 2888 | 2891 | 1 |
| 2888 | 2892 | 1 |
| 2888 | 2893 | 1 |
| 2889 | 2891 | 1 |
| 2889 | 2892 | 1 |
| 2889 | 2893 | 1 |
| 2890 | 2897 | 1 |
| 2890 | 2898 | 1 |
| 2890 | 2899 | 1 |

|      |      |   |
|------|------|---|
| 2891 | 2894 | 1 |
| 2891 | 2895 | 1 |
| 2891 | 2896 | 1 |
| 2892 | 2894 | 1 |
| 2892 | 2895 | 1 |
| 2892 | 2896 | 1 |
| 2894 | 2897 | 1 |
| 2894 | 2898 | 1 |
| 2894 | 2899 | 1 |
| 2895 | 2897 | 1 |
| 2895 | 2898 | 1 |
| 2895 | 2899 | 1 |
| 2900 | 2905 | 1 |
| 2900 | 2906 | 1 |
| 2900 | 2931 | 1 |
| 2900 | 2932 | 1 |
| 2900 | 2934 | 1 |
| 2900 | 2935 | 1 |
| 2900 | 2936 | 1 |
| 2901 | 2903 | 1 |
| 2901 | 2904 | 1 |
| 2901 | 2929 | 1 |
| 2901 | 2930 | 1 |
| 2901 | 2933 | 1 |
| 2902 | 2907 | 1 |
| 2902 | 2908 | 1 |
| 2902 | 2909 | 1 |
| 2902 | 2929 | 1 |
| 2902 | 2930 | 1 |
| 2902 | 2933 | 1 |
| 2903 | 2905 | 1 |
| 2903 | 2906 | 1 |
| 2903 | 2928 | 1 |
| 2904 | 2910 | 1 |
| 2904 | 2911 | 1 |
| 2904 | 2912 | 1 |
| 2904 | 2928 | 1 |
| 2905 | 2907 | 1 |
| 2905 | 2908 | 1 |
| 2905 | 2909 | 1 |
| 2906 | 2913 | 1 |
| 2906 | 2914 | 1 |
| 2906 | 2915 | 1 |
| 2907 | 2910 | 1 |
| 2907 | 2911 | 1 |
| 2907 | 2912 | 1 |
| 2908 | 2910 | 1 |
| 2908 | 2911 | 1 |
| 2908 | 2912 | 1 |
| 2909 | 2916 | 1 |
| 2909 | 2920 | 1 |
| 2909 | 2924 | 1 |
| 2910 | 2913 | 1 |
| 2910 | 2914 | 1 |

|      |      |   |
|------|------|---|
| 2910 | 2915 | 1 |
| 2911 | 2913 | 1 |
| 2911 | 2914 | 1 |
| 2911 | 2915 | 1 |
| 2912 | 2917 | 1 |
| 2912 | 2918 | 1 |
| 2912 | 2919 | 1 |
| 2912 | 2921 | 1 |
| 2912 | 2922 | 1 |
| 2912 | 2923 | 1 |
| 2912 | 2925 | 1 |
| 2912 | 2926 | 1 |
| 2912 | 2927 | 1 |
| 2913 | 2916 | 1 |
| 2913 | 2920 | 1 |
| 2913 | 2924 | 1 |
| 2914 | 2916 | 1 |
| 2914 | 2920 | 1 |
| 2914 | 2924 | 1 |
| 2916 | 2921 | 1 |
| 2916 | 2922 | 1 |
| 2916 | 2923 | 1 |
| 2916 | 2925 | 1 |
| 2916 | 2926 | 1 |
| 2916 | 2927 | 1 |
| 2917 | 2920 | 1 |
| 2917 | 2924 | 1 |
| 2918 | 2920 | 1 |
| 2918 | 2924 | 1 |
| 2919 | 2920 | 1 |
| 2919 | 2924 | 1 |
| 2920 | 2925 | 1 |
| 2920 | 2926 | 1 |
| 2920 | 2927 | 1 |
| 2921 | 2924 | 1 |
| 2922 | 2924 | 1 |
| 2923 | 2924 | 1 |
| 2928 | 2937 | 1 |
| 2928 | 2938 | 1 |
| 2928 | 2963 | 1 |
| 2929 | 2931 | 1 |
| 2929 | 2932 | 1 |
| 2929 | 2934 | 1 |
| 2929 | 2935 | 1 |
| 2929 | 2936 | 1 |
| 2930 | 2934 | 1 |
| 2930 | 2935 | 1 |
| 2930 | 2936 | 1 |
| 2931 | 2933 | 1 |
| 2932 | 2933 | 1 |
| 2933 | 2939 | 1 |
| 2933 | 2940 | 1 |
| 2933 | 2941 | 1 |
| 2933 | 2964 | 1 |

|      |      |   |
|------|------|---|
| 2933 | 2965 | 1 |
| 2933 | 2991 | 1 |
| 2934 | 2937 | 1 |
| 2934 | 2938 | 1 |
| 2934 | 2963 | 1 |
| 2935 | 2937 | 1 |
| 2935 | 2938 | 1 |
| 2935 | 2963 | 1 |
| 2936 | 2942 | 1 |
| 2936 | 2943 | 1 |
| 2936 | 2944 | 1 |
| 2936 | 2966 | 1 |
| 2936 | 2967 | 1 |
| 2936 | 2992 | 1 |
| 2936 | 2993 | 1 |
| 2936 | 2996 | 1 |
| 2937 | 2939 | 1 |
| 2937 | 2940 | 1 |
| 2937 | 2941 | 1 |
| 2937 | 2964 | 1 |
| 2937 | 2965 | 1 |
| 2937 | 2991 | 1 |
| 2938 | 2945 | 1 |
| 2938 | 2946 | 1 |
| 2938 | 2947 | 1 |
| 2938 | 2964 | 1 |
| 2938 | 2965 | 1 |
| 2938 | 2991 | 1 |
| 2939 | 2942 | 1 |
| 2939 | 2943 | 1 |
| 2939 | 2944 | 1 |
| 2939 | 2963 | 1 |
| 2940 | 2942 | 1 |
| 2940 | 2943 | 1 |
| 2940 | 2944 | 1 |
| 2940 | 2963 | 1 |
| 2941 | 2948 | 1 |
| 2941 | 2949 | 1 |
| 2941 | 2950 | 1 |
| 2941 | 2963 | 1 |
| 2942 | 2945 | 1 |
| 2942 | 2946 | 1 |
| 2942 | 2947 | 1 |
| 2943 | 2945 | 1 |
| 2943 | 2946 | 1 |
| 2943 | 2947 | 1 |
| 2944 | 2951 | 1 |
| 2944 | 2952 | 1 |
| 2944 | 2953 | 1 |
| 2945 | 2948 | 1 |
| 2945 | 2949 | 1 |
| 2945 | 2950 | 1 |
| 2946 | 2948 | 1 |
| 2946 | 2949 | 1 |

|      |      |   |
|------|------|---|
| 2946 | 2950 | 1 |
| 2947 | 2954 | 1 |
| 2947 | 2955 | 1 |
| 2947 | 2956 | 1 |
| 2948 | 2951 | 1 |
| 2948 | 2952 | 1 |
| 2948 | 2953 | 1 |
| 2949 | 2951 | 1 |
| 2949 | 2952 | 1 |
| 2949 | 2953 | 1 |
| 2950 | 2957 | 1 |
| 2950 | 2958 | 1 |
| 2950 | 2959 | 1 |
| 2951 | 2954 | 1 |
| 2951 | 2955 | 1 |
| 2951 | 2956 | 1 |
| 2952 | 2954 | 1 |
| 2952 | 2955 | 1 |
| 2952 | 2956 | 1 |
| 2953 | 2960 | 1 |
| 2953 | 2961 | 1 |
| 2953 | 2962 | 1 |
| 2954 | 2957 | 1 |
| 2954 | 2958 | 1 |
| 2954 | 2959 | 1 |
| 2955 | 2957 | 1 |
| 2955 | 2958 | 1 |
| 2955 | 2959 | 1 |
| 2957 | 2960 | 1 |
| 2957 | 2961 | 1 |
| 2957 | 2962 | 1 |
| 2958 | 2960 | 1 |
| 2958 | 2961 | 1 |
| 2958 | 2962 | 1 |
| 2963 | 2968 | 1 |
| 2963 | 2969 | 1 |
| 2963 | 2994 | 1 |
| 2963 | 2995 | 1 |
| 2963 | 2997 | 1 |
| 2963 | 2998 | 1 |
| 2963 | 2999 | 1 |
| 2964 | 2966 | 1 |
| 2964 | 2967 | 1 |
| 2964 | 2992 | 1 |
| 2964 | 2993 | 1 |
| 2964 | 2996 | 1 |
| 2965 | 2970 | 1 |
| 2965 | 2971 | 1 |
| 2965 | 2972 | 1 |
| 2965 | 2992 | 1 |
| 2965 | 2993 | 1 |
| 2965 | 2996 | 1 |
| 2966 | 2968 | 1 |
| 2966 | 2969 | 1 |



|      |      |   |
|------|------|---|
| 2966 | 2991 | 1 |
| 2967 | 2973 | 1 |
| 2967 | 2974 | 1 |
| 2967 | 2975 | 1 |
| 2967 | 2991 | 1 |
| 2968 | 2970 | 1 |
| 2968 | 2971 | 1 |
| 2968 | 2972 | 1 |
| 2969 | 2976 | 1 |
| 2969 | 2977 | 1 |
| 2969 | 2978 | 1 |
| 2970 | 2973 | 1 |
| 2970 | 2974 | 1 |
| 2970 | 2975 | 1 |
| 2971 | 2973 | 1 |
| 2971 | 2974 | 1 |
| 2971 | 2975 | 1 |
| 2972 | 2979 | 1 |
| 2972 | 2983 | 1 |
| 2972 | 2987 | 1 |
| 2973 | 2976 | 1 |
| 2973 | 2977 | 1 |
| 2973 | 2978 | 1 |
| 2974 | 2976 | 1 |
| 2974 | 2977 | 1 |
| 2974 | 2978 | 1 |
| 2975 | 2980 | 1 |
| 2975 | 2981 | 1 |
| 2975 | 2982 | 1 |
| 2975 | 2984 | 1 |
| 2975 | 2985 | 1 |
| 2975 | 2986 | 1 |
| 2975 | 2988 | 1 |
| 2975 | 2989 | 1 |
| 2975 | 2990 | 1 |
| 2976 | 2979 | 1 |
| 2976 | 2983 | 1 |
| 2976 | 2987 | 1 |
| 2977 | 2979 | 1 |
| 2977 | 2983 | 1 |
| 2977 | 2987 | 1 |
| 2979 | 2984 | 1 |
| 2979 | 2985 | 1 |
| 2979 | 2986 | 1 |
| 2979 | 2988 | 1 |
| 2979 | 2989 | 1 |
| 2979 | 2990 | 1 |
| 2980 | 2983 | 1 |
| 2980 | 2987 | 1 |
| 2981 | 2983 | 1 |
| 2981 | 2987 | 1 |
| 2982 | 2983 | 1 |
| 2982 | 2987 | 1 |
| 2983 | 2988 | 1 |

|      |      |   |
|------|------|---|
| 2983 | 2989 | 1 |
| 2983 | 2990 | 1 |
| 2984 | 2987 | 1 |
| 2985 | 2987 | 1 |
| 2986 | 2987 | 1 |
| 2991 | 3000 | 1 |
| 2991 | 3001 | 1 |
| 2991 | 3026 | 1 |
| 2992 | 2994 | 1 |
| 2992 | 2995 | 1 |
| 2992 | 2997 | 1 |
| 2992 | 2998 | 1 |
| 2992 | 2999 | 1 |
| 2993 | 2997 | 1 |
| 2993 | 2998 | 1 |
| 2993 | 2999 | 1 |
| 2994 | 2996 | 1 |
| 2995 | 2996 | 1 |
| 2996 | 3002 | 1 |
| 2996 | 3003 | 1 |
| 2996 | 3004 | 1 |
| 2996 | 3027 | 1 |
| 2996 | 3028 | 1 |
| 2996 | 3054 | 1 |
| 2997 | 3000 | 1 |
| 2997 | 3001 | 1 |
| 2997 | 3026 | 1 |
| 2998 | 3000 | 1 |
| 2998 | 3001 | 1 |
| 2998 | 3026 | 1 |
| 2999 | 3005 | 1 |
| 2999 | 3006 | 1 |
| 2999 | 3007 | 1 |
| 2999 | 3029 | 1 |
| 2999 | 3030 | 1 |
| 2999 | 3055 | 1 |
| 2999 | 3056 | 1 |
| 2999 | 3059 | 1 |
| 3000 | 3002 | 1 |
| 3000 | 3003 | 1 |
| 3000 | 3004 | 1 |
| 3000 | 3027 | 1 |
| 3000 | 3028 | 1 |
| 3000 | 3054 | 1 |
| 3001 | 3008 | 1 |
| 3001 | 3009 | 1 |
| 3001 | 3010 | 1 |
| 3001 | 3027 | 1 |
| 3001 | 3028 | 1 |
| 3001 | 3054 | 1 |
| 3002 | 3005 | 1 |
| 3002 | 3006 | 1 |
| 3002 | 3007 | 1 |
| 3002 | 3026 | 1 |

|      |      |   |
|------|------|---|
| 3003 | 3005 | 1 |
| 3003 | 3006 | 1 |
| 3003 | 3007 | 1 |
| 3003 | 3026 | 1 |
| 3004 | 3011 | 1 |
| 3004 | 3012 | 1 |
| 3004 | 3013 | 1 |
| 3004 | 3026 | 1 |
| 3005 | 3008 | 1 |
| 3005 | 3009 | 1 |
| 3005 | 3010 | 1 |
| 3006 | 3008 | 1 |
| 3006 | 3009 | 1 |
| 3006 | 3010 | 1 |
| 3007 | 3014 | 1 |
| 3007 | 3015 | 1 |
| 3007 | 3016 | 1 |
| 3008 | 3011 | 1 |
| 3008 | 3012 | 1 |
| 3008 | 3013 | 1 |
| 3009 | 3011 | 1 |
| 3009 | 3012 | 1 |
| 3009 | 3013 | 1 |
| 3010 | 3017 | 1 |
| 3010 | 3018 | 1 |
| 3010 | 3019 | 1 |
| 3011 | 3014 | 1 |
| 3011 | 3015 | 1 |
| 3011 | 3016 | 1 |
| 3012 | 3014 | 1 |
| 3012 | 3015 | 1 |
| 3012 | 3016 | 1 |
| 3013 | 3020 | 1 |
| 3013 | 3021 | 1 |
| 3013 | 3022 | 1 |
| 3014 | 3017 | 1 |
| 3014 | 3018 | 1 |
| 3014 | 3019 | 1 |
| 3015 | 3017 | 1 |
| 3015 | 3018 | 1 |
| 3015 | 3019 | 1 |
| 3016 | 3023 | 1 |
| 3016 | 3024 | 1 |
| 3016 | 3025 | 1 |
| 3017 | 3020 | 1 |
| 3017 | 3021 | 1 |
| 3017 | 3022 | 1 |
| 3018 | 3020 | 1 |
| 3018 | 3021 | 1 |
| 3018 | 3022 | 1 |
| 3020 | 3023 | 1 |
| 3020 | 3024 | 1 |
| 3020 | 3025 | 1 |
| 3021 | 3023 | 1 |

|      |      |   |
|------|------|---|
| 3021 | 3024 | 1 |
| 3021 | 3025 | 1 |
| 3026 | 3031 | 1 |
| 3026 | 3032 | 1 |
| 3026 | 3057 | 1 |
| 3026 | 3058 | 1 |
| 3026 | 3060 | 1 |
| 3026 | 3061 | 1 |
| 3026 | 3062 | 1 |
| 3027 | 3029 | 1 |
| 3027 | 3030 | 1 |
| 3027 | 3055 | 1 |
| 3027 | 3056 | 1 |
| 3027 | 3059 | 1 |
| 3028 | 3033 | 1 |
| 3028 | 3034 | 1 |
| 3028 | 3035 | 1 |
| 3028 | 3055 | 1 |
| 3028 | 3056 | 1 |
| 3028 | 3059 | 1 |
| 3029 | 3031 | 1 |
| 3029 | 3032 | 1 |
| 3029 | 3054 | 1 |
| 3030 | 3036 | 1 |
| 3030 | 3037 | 1 |
| 3030 | 3038 | 1 |
| 3030 | 3054 | 1 |
| 3031 | 3033 | 1 |
| 3031 | 3034 | 1 |
| 3031 | 3035 | 1 |
| 3032 | 3039 | 1 |
| 3032 | 3040 | 1 |
| 3032 | 3041 | 1 |
| 3033 | 3036 | 1 |
| 3033 | 3037 | 1 |
| 3033 | 3038 | 1 |
| 3034 | 3036 | 1 |
| 3034 | 3037 | 1 |
| 3034 | 3038 | 1 |
| 3035 | 3042 | 1 |
| 3035 | 3046 | 1 |
| 3035 | 3050 | 1 |
| 3036 | 3039 | 1 |
| 3036 | 3040 | 1 |
| 3036 | 3041 | 1 |
| 3037 | 3039 | 1 |
| 3037 | 3040 | 1 |
| 3037 | 3041 | 1 |
| 3038 | 3043 | 1 |
| 3038 | 3044 | 1 |
| 3038 | 3045 | 1 |
| 3038 | 3047 | 1 |
| 3038 | 3048 | 1 |
| 3038 | 3049 | 1 |

|      |      |   |
|------|------|---|
| 3038 | 3051 | 1 |
| 3038 | 3052 | 1 |
| 3038 | 3053 | 1 |
| 3039 | 3042 | 1 |
| 3039 | 3046 | 1 |
| 3039 | 3050 | 1 |
| 3040 | 3042 | 1 |
| 3040 | 3046 | 1 |
| 3040 | 3050 | 1 |
| 3042 | 3047 | 1 |
| 3042 | 3048 | 1 |
| 3042 | 3049 | 1 |
| 3042 | 3051 | 1 |
| 3042 | 3052 | 1 |
| 3042 | 3053 | 1 |
| 3043 | 3046 | 1 |
| 3043 | 3050 | 1 |
| 3044 | 3046 | 1 |
| 3044 | 3050 | 1 |
| 3045 | 3046 | 1 |
| 3045 | 3050 | 1 |
| 3046 | 3051 | 1 |
| 3046 | 3052 | 1 |
| 3046 | 3053 | 1 |
| 3047 | 3050 | 1 |
| 3048 | 3050 | 1 |
| 3049 | 3050 | 1 |
| 3054 | 3063 | 1 |
| 3054 | 3064 | 1 |
| 3054 | 3089 | 1 |
| 3055 | 3057 | 1 |
| 3055 | 3058 | 1 |
| 3055 | 3060 | 1 |
| 3055 | 3061 | 1 |
| 3055 | 3062 | 1 |
| 3056 | 3060 | 1 |
| 3056 | 3061 | 1 |
| 3056 | 3062 | 1 |
| 3057 | 3059 | 1 |
| 3058 | 3059 | 1 |
| 3059 | 3065 | 1 |
| 3059 | 3066 | 1 |
| 3059 | 3067 | 1 |
| 3059 | 3090 | 1 |
| 3059 | 3091 | 1 |
| 3059 | 3117 | 1 |
| 3060 | 3063 | 1 |
| 3060 | 3064 | 1 |
| 3060 | 3089 | 1 |
| 3061 | 3063 | 1 |
| 3061 | 3064 | 1 |
| 3061 | 3089 | 1 |
| 3062 | 3068 | 1 |
| 3062 | 3069 | 1 |

|      |      |   |
|------|------|---|
| 3062 | 3070 | 1 |
| 3062 | 3092 | 1 |
| 3062 | 3093 | 1 |
| 3062 | 3118 | 1 |
| 3062 | 3119 | 1 |
| 3062 | 3122 | 1 |
| 3063 | 3065 | 1 |
| 3063 | 3066 | 1 |
| 3063 | 3067 | 1 |
| 3063 | 3090 | 1 |
| 3063 | 3091 | 1 |
| 3063 | 3117 | 1 |
| 3064 | 3071 | 1 |
| 3064 | 3072 | 1 |
| 3064 | 3073 | 1 |
| 3064 | 3090 | 1 |
| 3064 | 3091 | 1 |
| 3064 | 3117 | 1 |
| 3065 | 3068 | 1 |
| 3065 | 3069 | 1 |
| 3065 | 3070 | 1 |
| 3065 | 3089 | 1 |
| 3066 | 3068 | 1 |
| 3066 | 3069 | 1 |
| 3066 | 3070 | 1 |
| 3066 | 3089 | 1 |
| 3067 | 3074 | 1 |
| 3067 | 3075 | 1 |
| 3067 | 3076 | 1 |
| 3067 | 3089 | 1 |
| 3068 | 3071 | 1 |
| 3068 | 3072 | 1 |
| 3068 | 3073 | 1 |
| 3069 | 3071 | 1 |
| 3069 | 3072 | 1 |
| 3069 | 3073 | 1 |
| 3070 | 3077 | 1 |
| 3070 | 3078 | 1 |
| 3070 | 3079 | 1 |
| 3071 | 3074 | 1 |
| 3071 | 3075 | 1 |
| 3071 | 3076 | 1 |
| 3072 | 3074 | 1 |
| 3072 | 3075 | 1 |
| 3072 | 3076 | 1 |
| 3073 | 3080 | 1 |
| 3073 | 3081 | 1 |
| 3073 | 3082 | 1 |
| 3074 | 3077 | 1 |
| 3074 | 3078 | 1 |
| 3074 | 3079 | 1 |
| 3075 | 3077 | 1 |
| 3075 | 3078 | 1 |
| 3075 | 3079 | 1 |

|      |      |   |
|------|------|---|
| 3076 | 3083 | 1 |
| 3076 | 3084 | 1 |
| 3076 | 3085 | 1 |
| 3077 | 3080 | 1 |
| 3077 | 3081 | 1 |
| 3077 | 3082 | 1 |
| 3078 | 3080 | 1 |
| 3078 | 3081 | 1 |
| 3078 | 3082 | 1 |
| 3079 | 3086 | 1 |
| 3079 | 3087 | 1 |
| 3079 | 3088 | 1 |
| 3080 | 3083 | 1 |
| 3080 | 3084 | 1 |
| 3080 | 3085 | 1 |
| 3081 | 3083 | 1 |
| 3081 | 3084 | 1 |
| 3081 | 3085 | 1 |
| 3083 | 3086 | 1 |
| 3083 | 3087 | 1 |
| 3083 | 3088 | 1 |
| 3084 | 3086 | 1 |
| 3084 | 3087 | 1 |
| 3084 | 3088 | 1 |
| 3089 | 3094 | 1 |
| 3089 | 3095 | 1 |
| 3089 | 3120 | 1 |
| 3089 | 3121 | 1 |
| 3089 | 3123 | 1 |
| 3089 | 3124 | 1 |
| 3089 | 3125 | 1 |
| 3090 | 3092 | 1 |
| 3090 | 3093 | 1 |
| 3090 | 3118 | 1 |
| 3090 | 3119 | 1 |
| 3090 | 3122 | 1 |
| 3091 | 3096 | 1 |
| 3091 | 3097 | 1 |
| 3091 | 3098 | 1 |
| 3091 | 3118 | 1 |
| 3091 | 3119 | 1 |
| 3091 | 3122 | 1 |
| 3092 | 3094 | 1 |
| 3092 | 3095 | 1 |
| 3092 | 3117 | 1 |
| 3093 | 3099 | 1 |
| 3093 | 3100 | 1 |
| 3093 | 3101 | 1 |
| 3093 | 3117 | 1 |
| 3094 | 3096 | 1 |
| 3094 | 3097 | 1 |
| 3094 | 3098 | 1 |
| 3095 | 3102 | 1 |
| 3095 | 3103 | 1 |

|      |      |   |
|------|------|---|
| 3095 | 3104 | 1 |
| 3096 | 3099 | 1 |
| 3096 | 3100 | 1 |
| 3096 | 3101 | 1 |
| 3097 | 3099 | 1 |
| 3097 | 3100 | 1 |
| 3097 | 3101 | 1 |
| 3098 | 3105 | 1 |
| 3098 | 3109 | 1 |
| 3098 | 3113 | 1 |
| 3099 | 3102 | 1 |
| 3099 | 3103 | 1 |
| 3099 | 3104 | 1 |
| 3100 | 3102 | 1 |
| 3100 | 3103 | 1 |
| 3100 | 3104 | 1 |
| 3101 | 3106 | 1 |
| 3101 | 3107 | 1 |
| 3101 | 3108 | 1 |
| 3101 | 3110 | 1 |
| 3101 | 3111 | 1 |
| 3101 | 3112 | 1 |
| 3101 | 3114 | 1 |
| 3101 | 3115 | 1 |
| 3101 | 3116 | 1 |
| 3102 | 3105 | 1 |
| 3102 | 3109 | 1 |
| 3102 | 3113 | 1 |
| 3103 | 3105 | 1 |
| 3103 | 3109 | 1 |
| 3103 | 3113 | 1 |
| 3105 | 3110 | 1 |
| 3105 | 3111 | 1 |
| 3105 | 3112 | 1 |
| 3105 | 3114 | 1 |
| 3105 | 3115 | 1 |
| 3105 | 3116 | 1 |
| 3106 | 3109 | 1 |
| 3106 | 3113 | 1 |
| 3107 | 3109 | 1 |
| 3107 | 3113 | 1 |
| 3108 | 3109 | 1 |
| 3108 | 3113 | 1 |
| 3109 | 3114 | 1 |
| 3109 | 3115 | 1 |
| 3109 | 3116 | 1 |
| 3110 | 3113 | 1 |
| 3111 | 3113 | 1 |
| 3112 | 3113 | 1 |
| 3117 | 3126 | 1 |
| 3117 | 3127 | 1 |
| 3117 | 3152 | 1 |
| 3118 | 3120 | 1 |
| 3118 | 3121 | 1 |



|      |      |   |
|------|------|---|
| 3118 | 3123 | 1 |
| 3118 | 3124 | 1 |
| 3118 | 3125 | 1 |
| 3119 | 3123 | 1 |
| 3119 | 3124 | 1 |
| 3119 | 3125 | 1 |
| 3120 | 3122 | 1 |
| 3121 | 3122 | 1 |
| 3122 | 3128 | 1 |
| 3122 | 3129 | 1 |
| 3122 | 3130 | 1 |
| 3122 | 3153 | 1 |
| 3122 | 3154 | 1 |
| 3122 | 3180 | 1 |
| 3123 | 3126 | 1 |
| 3123 | 3127 | 1 |
| 3123 | 3152 | 1 |
| 3124 | 3126 | 1 |
| 3124 | 3127 | 1 |
| 3124 | 3152 | 1 |
| 3125 | 3131 | 1 |
| 3125 | 3132 | 1 |
| 3125 | 3133 | 1 |
| 3125 | 3155 | 1 |
| 3125 | 3156 | 1 |
| 3125 | 3181 | 1 |
| 3125 | 3182 | 1 |
| 3125 | 3185 | 1 |
| 3126 | 3128 | 1 |
| 3126 | 3129 | 1 |
| 3126 | 3130 | 1 |
| 3126 | 3153 | 1 |
| 3126 | 3154 | 1 |
| 3126 | 3180 | 1 |
| 3127 | 3134 | 1 |
| 3127 | 3135 | 1 |
| 3127 | 3136 | 1 |
| 3127 | 3153 | 1 |
| 3127 | 3154 | 1 |
| 3127 | 3180 | 1 |
| 3128 | 3131 | 1 |
| 3128 | 3132 | 1 |
| 3128 | 3133 | 1 |
| 3128 | 3152 | 1 |
| 3129 | 3131 | 1 |
| 3129 | 3132 | 1 |
| 3129 | 3133 | 1 |
| 3129 | 3152 | 1 |
| 3130 | 3137 | 1 |
| 3130 | 3138 | 1 |
| 3130 | 3139 | 1 |
| 3130 | 3152 | 1 |
| 3131 | 3134 | 1 |
| 3131 | 3135 | 1 |

|      |      |   |
|------|------|---|
| 3131 | 3136 | 1 |
| 3132 | 3134 | 1 |
| 3132 | 3135 | 1 |
| 3132 | 3136 | 1 |
| 3133 | 3140 | 1 |
| 3133 | 3141 | 1 |
| 3133 | 3142 | 1 |
| 3134 | 3137 | 1 |
| 3134 | 3138 | 1 |
| 3134 | 3139 | 1 |
| 3135 | 3137 | 1 |
| 3135 | 3138 | 1 |
| 3135 | 3139 | 1 |
| 3136 | 3143 | 1 |
| 3136 | 3144 | 1 |
| 3136 | 3145 | 1 |
| 3137 | 3140 | 1 |
| 3137 | 3141 | 1 |
| 3137 | 3142 | 1 |
| 3138 | 3140 | 1 |
| 3138 | 3141 | 1 |
| 3138 | 3142 | 1 |
| 3139 | 3146 | 1 |
| 3139 | 3147 | 1 |
| 3139 | 3148 | 1 |
| 3140 | 3143 | 1 |
| 3140 | 3144 | 1 |
| 3140 | 3145 | 1 |
| 3141 | 3143 | 1 |
| 3141 | 3144 | 1 |
| 3141 | 3145 | 1 |
| 3142 | 3149 | 1 |
| 3142 | 3150 | 1 |
| 3142 | 3151 | 1 |
| 3143 | 3146 | 1 |
| 3143 | 3147 | 1 |
| 3143 | 3148 | 1 |
| 3144 | 3146 | 1 |
| 3144 | 3147 | 1 |
| 3144 | 3148 | 1 |
| 3146 | 3149 | 1 |
| 3146 | 3150 | 1 |
| 3146 | 3151 | 1 |
| 3147 | 3149 | 1 |
| 3147 | 3150 | 1 |
| 3147 | 3151 | 1 |
| 3152 | 3157 | 1 |
| 3152 | 3158 | 1 |
| 3152 | 3183 | 1 |
| 3152 | 3184 | 1 |
| 3152 | 3186 | 1 |
| 3152 | 3187 | 1 |
| 3152 | 3188 | 1 |
| 3153 | 3155 | 1 |

|      |      |   |
|------|------|---|
| 3153 | 3156 | 1 |
| 3153 | 3181 | 1 |
| 3153 | 3182 | 1 |
| 3153 | 3185 | 1 |
| 3154 | 3159 | 1 |
| 3154 | 3160 | 1 |
| 3154 | 3161 | 1 |
| 3154 | 3181 | 1 |
| 3154 | 3182 | 1 |
| 3154 | 3185 | 1 |
| 3155 | 3157 | 1 |
| 3155 | 3158 | 1 |
| 3155 | 3180 | 1 |
| 3156 | 3162 | 1 |
| 3156 | 3163 | 1 |
| 3156 | 3164 | 1 |
| 3156 | 3180 | 1 |
| 3157 | 3159 | 1 |
| 3157 | 3160 | 1 |
| 3157 | 3161 | 1 |
| 3158 | 3165 | 1 |
| 3158 | 3166 | 1 |
| 3158 | 3167 | 1 |
| 3159 | 3162 | 1 |
| 3159 | 3163 | 1 |
| 3159 | 3164 | 1 |
| 3160 | 3162 | 1 |
| 3160 | 3163 | 1 |
| 3160 | 3164 | 1 |
| 3161 | 3168 | 1 |
| 3161 | 3172 | 1 |
| 3161 | 3176 | 1 |
| 3162 | 3165 | 1 |
| 3162 | 3166 | 1 |
| 3162 | 3167 | 1 |
| 3163 | 3165 | 1 |
| 3163 | 3166 | 1 |
| 3163 | 3167 | 1 |
| 3164 | 3169 | 1 |
| 3164 | 3170 | 1 |
| 3164 | 3171 | 1 |
| 3164 | 3173 | 1 |
| 3164 | 3174 | 1 |
| 3164 | 3175 | 1 |
| 3164 | 3177 | 1 |
| 3164 | 3178 | 1 |
| 3164 | 3179 | 1 |
| 3165 | 3168 | 1 |
| 3165 | 3172 | 1 |
| 3165 | 3176 | 1 |
| 3166 | 3168 | 1 |
| 3166 | 3172 | 1 |
| 3166 | 3176 | 1 |
| 3168 | 3173 | 1 |

|      |      |   |
|------|------|---|
| 3168 | 3174 | 1 |
| 3168 | 3175 | 1 |
| 3168 | 3177 | 1 |
| 3168 | 3178 | 1 |
| 3168 | 3179 | 1 |
| 3169 | 3172 | 1 |
| 3169 | 3176 | 1 |
| 3170 | 3172 | 1 |
| 3170 | 3176 | 1 |
| 3171 | 3172 | 1 |
| 3171 | 3176 | 1 |
| 3172 | 3177 | 1 |
| 3172 | 3178 | 1 |
| 3172 | 3179 | 1 |
| 3173 | 3176 | 1 |
| 3174 | 3176 | 1 |
| 3175 | 3176 | 1 |
| 3180 | 3189 | 1 |
| 3180 | 3190 | 1 |
| 3180 | 3215 | 1 |
| 3181 | 3183 | 1 |
| 3181 | 3184 | 1 |
| 3181 | 3186 | 1 |
| 3181 | 3187 | 1 |
| 3181 | 3188 | 1 |
| 3182 | 3186 | 1 |
| 3182 | 3187 | 1 |
| 3182 | 3188 | 1 |
| 3183 | 3185 | 1 |
| 3184 | 3185 | 1 |
| 3185 | 3191 | 1 |
| 3185 | 3192 | 1 |
| 3185 | 3193 | 1 |
| 3185 | 3216 | 1 |
| 3185 | 3217 | 1 |
| 3185 | 3243 | 1 |
| 3186 | 3189 | 1 |
| 3186 | 3190 | 1 |
| 3186 | 3215 | 1 |
| 3187 | 3189 | 1 |
| 3187 | 3190 | 1 |
| 3187 | 3215 | 1 |
| 3188 | 3194 | 1 |
| 3188 | 3195 | 1 |
| 3188 | 3196 | 1 |
| 3188 | 3218 | 1 |
| 3188 | 3219 | 1 |
| 3188 | 3244 | 1 |
| 3188 | 3245 | 1 |
| 3188 | 3248 | 1 |
| 3189 | 3191 | 1 |
| 3189 | 3192 | 1 |
| 3189 | 3193 | 1 |
| 3189 | 3216 | 1 |

|      |      |   |
|------|------|---|
| 3189 | 3217 | 1 |
| 3189 | 3243 | 1 |
| 3190 | 3197 | 1 |
| 3190 | 3198 | 1 |
| 3190 | 3199 | 1 |
| 3190 | 3216 | 1 |
| 3190 | 3217 | 1 |
| 3190 | 3243 | 1 |
| 3191 | 3194 | 1 |
| 3191 | 3195 | 1 |
| 3191 | 3196 | 1 |
| 3191 | 3215 | 1 |
| 3192 | 3194 | 1 |
| 3192 | 3195 | 1 |
| 3192 | 3196 | 1 |
| 3192 | 3215 | 1 |
| 3193 | 3200 | 1 |
| 3193 | 3201 | 1 |
| 3193 | 3202 | 1 |
| 3193 | 3215 | 1 |
| 3194 | 3197 | 1 |
| 3194 | 3198 | 1 |
| 3194 | 3199 | 1 |
| 3195 | 3197 | 1 |
| 3195 | 3198 | 1 |
| 3195 | 3199 | 1 |
| 3196 | 3203 | 1 |
| 3196 | 3204 | 1 |
| 3196 | 3205 | 1 |
| 3197 | 3200 | 1 |
| 3197 | 3201 | 1 |
| 3197 | 3202 | 1 |
| 3198 | 3200 | 1 |
| 3198 | 3201 | 1 |
| 3198 | 3202 | 1 |
| 3199 | 3206 | 1 |
| 3199 | 3207 | 1 |
| 3199 | 3208 | 1 |
| 3200 | 3203 | 1 |
| 3200 | 3204 | 1 |
| 3200 | 3205 | 1 |
| 3201 | 3203 | 1 |
| 3201 | 3204 | 1 |
| 3201 | 3205 | 1 |
| 3202 | 3209 | 1 |
| 3202 | 3210 | 1 |
| 3202 | 3211 | 1 |
| 3203 | 3206 | 1 |
| 3203 | 3207 | 1 |
| 3203 | 3208 | 1 |
| 3204 | 3206 | 1 |
| 3204 | 3207 | 1 |
| 3204 | 3208 | 1 |
| 3205 | 3212 | 1 |

|      |      |   |
|------|------|---|
| 3205 | 3213 | 1 |
| 3205 | 3214 | 1 |
| 3206 | 3209 | 1 |
| 3206 | 3210 | 1 |
| 3206 | 3211 | 1 |
| 3207 | 3209 | 1 |
| 3207 | 3210 | 1 |
| 3207 | 3211 | 1 |
| 3209 | 3212 | 1 |
| 3209 | 3213 | 1 |
| 3209 | 3214 | 1 |
| 3210 | 3212 | 1 |
| 3210 | 3213 | 1 |
| 3210 | 3214 | 1 |
| 3215 | 3220 | 1 |
| 3215 | 3221 | 1 |
| 3215 | 3246 | 1 |
| 3215 | 3247 | 1 |
| 3215 | 3249 | 1 |
| 3215 | 3250 | 1 |
| 3215 | 3251 | 1 |
| 3216 | 3218 | 1 |
| 3216 | 3219 | 1 |
| 3216 | 3244 | 1 |
| 3216 | 3245 | 1 |
| 3216 | 3248 | 1 |
| 3217 | 3222 | 1 |
| 3217 | 3223 | 1 |
| 3217 | 3224 | 1 |
| 3217 | 3244 | 1 |
| 3217 | 3245 | 1 |
| 3217 | 3248 | 1 |
| 3218 | 3220 | 1 |
| 3218 | 3221 | 1 |
| 3218 | 3243 | 1 |
| 3219 | 3225 | 1 |
| 3219 | 3226 | 1 |
| 3219 | 3227 | 1 |
| 3219 | 3243 | 1 |
| 3220 | 3222 | 1 |
| 3220 | 3223 | 1 |
| 3220 | 3224 | 1 |
| 3221 | 3228 | 1 |
| 3221 | 3229 | 1 |
| 3221 | 3230 | 1 |
| 3222 | 3225 | 1 |
| 3222 | 3226 | 1 |
| 3222 | 3227 | 1 |
| 3223 | 3225 | 1 |
| 3223 | 3226 | 1 |
| 3223 | 3227 | 1 |
| 3224 | 3231 | 1 |
| 3224 | 3235 | 1 |
| 3224 | 3239 | 1 |

|      |      |   |
|------|------|---|
| 3225 | 3228 | 1 |
| 3225 | 3229 | 1 |
| 3225 | 3230 | 1 |
| 3226 | 3228 | 1 |
| 3226 | 3229 | 1 |
| 3226 | 3230 | 1 |
| 3227 | 3232 | 1 |
| 3227 | 3233 | 1 |
| 3227 | 3234 | 1 |
| 3227 | 3236 | 1 |
| 3227 | 3237 | 1 |
| 3227 | 3238 | 1 |
| 3227 | 3240 | 1 |
| 3227 | 3241 | 1 |
| 3227 | 3242 | 1 |
| 3228 | 3231 | 1 |
| 3228 | 3235 | 1 |
| 3228 | 3239 | 1 |
| 3229 | 3231 | 1 |
| 3229 | 3235 | 1 |
| 3229 | 3239 | 1 |
| 3231 | 3236 | 1 |
| 3231 | 3237 | 1 |
| 3231 | 3238 | 1 |
| 3231 | 3240 | 1 |
| 3231 | 3241 | 1 |
| 3231 | 3242 | 1 |
| 3232 | 3235 | 1 |
| 3232 | 3239 | 1 |
| 3233 | 3235 | 1 |
| 3233 | 3239 | 1 |
| 3234 | 3235 | 1 |
| 3234 | 3239 | 1 |
| 3235 | 3240 | 1 |
| 3235 | 3241 | 1 |
| 3235 | 3242 | 1 |
| 3236 | 3239 | 1 |
| 3237 | 3239 | 1 |
| 3238 | 3239 | 1 |
| 3243 | 3252 | 1 |
| 3243 | 3253 | 1 |
| 3243 | 3254 | 1 |
| 3244 | 3246 | 1 |
| 3244 | 3247 | 1 |
| 3244 | 3249 | 1 |
| 3244 | 3250 | 1 |
| 3244 | 3251 | 1 |
| 3245 | 3249 | 1 |
| 3245 | 3250 | 1 |
| 3245 | 3251 | 1 |
| 3246 | 3248 | 1 |
| 3247 | 3248 | 1 |
| 3248 | 3255 | 1 |
| 3248 | 3256 | 1 |

|      |      |   |
|------|------|---|
| 3248 | 3257 | 1 |
| 3249 | 3252 | 1 |
| 3249 | 3253 | 1 |
| 3249 | 3254 | 1 |
| 3250 | 3252 | 1 |
| 3250 | 3253 | 1 |
| 3250 | 3254 | 1 |
| 3251 | 3258 | 1 |
| 3251 | 3259 | 1 |
| 3251 | 3260 | 1 |
| 3252 | 3255 | 1 |
| 3252 | 3256 | 1 |
| 3252 | 3257 | 1 |
| 3253 | 3255 | 1 |
| 3253 | 3256 | 1 |
| 3253 | 3257 | 1 |
| 3254 | 3261 | 1 |
| 3254 | 3262 | 1 |
| 3254 | 3263 | 1 |
| 3255 | 3258 | 1 |
| 3255 | 3259 | 1 |
| 3255 | 3260 | 1 |
| 3256 | 3258 | 1 |
| 3256 | 3259 | 1 |
| 3256 | 3260 | 1 |
| 3257 | 3264 | 1 |
| 3257 | 3265 | 1 |
| 3257 | 3266 | 1 |
| 3258 | 3261 | 1 |
| 3258 | 3262 | 1 |
| 3258 | 3263 | 1 |
| 3259 | 3261 | 1 |
| 3259 | 3262 | 1 |
| 3259 | 3263 | 1 |
| 3260 | 3267 | 1 |
| 3260 | 3268 | 1 |
| 3260 | 3269 | 1 |
| 3261 | 3264 | 1 |
| 3261 | 3265 | 1 |
| 3261 | 3266 | 1 |
| 3262 | 3264 | 1 |
| 3262 | 3265 | 1 |
| 3262 | 3266 | 1 |
| 3263 | 3270 | 1 |
| 3263 | 3271 | 1 |
| 3263 | 3272 | 1 |
| 3264 | 3267 | 1 |
| 3264 | 3268 | 1 |
| 3264 | 3269 | 1 |
| 3265 | 3267 | 1 |
| 3265 | 3268 | 1 |
| 3265 | 3269 | 1 |
| 3266 | 3273 | 1 |
| 3266 | 3274 | 1 |



|      |      |   |
|------|------|---|
| 3266 | 3275 | 1 |
| 3267 | 3270 | 1 |
| 3267 | 3271 | 1 |
| 3267 | 3272 | 1 |
| 3268 | 3270 | 1 |
| 3268 | 3271 | 1 |
| 3268 | 3272 | 1 |
| 3269 | 3276 | 1 |
| 3269 | 3277 | 1 |
| 3269 | 3278 | 1 |
| 3270 | 3273 | 1 |
| 3270 | 3274 | 1 |
| 3270 | 3275 | 1 |
| 3271 | 3273 | 1 |
| 3271 | 3274 | 1 |
| 3271 | 3275 | 1 |
| 3273 | 3276 | 1 |
| 3273 | 3277 | 1 |
| 3273 | 3278 | 1 |
| 3274 | 3276 | 1 |
| 3274 | 3277 | 1 |
| 3274 | 3278 | 1 |

[ angles ]

|    | ai | aj | ak | funct | c0 | c1 | c2 |
|----|----|----|----|-------|----|----|----|
| c3 |    |    |    |       |    |    |    |
|    | 2  | 1  | 3  | 5     |    |    |    |
|    | 2  | 1  | 4  | 5     |    |    |    |
|    | 2  | 1  | 30 | 5     |    |    |    |
|    | 3  | 1  | 4  | 5     |    |    |    |
|    | 3  | 1  | 30 | 5     |    |    |    |
|    | 4  | 1  | 30 | 5     |    |    |    |
|    | 1  | 4  | 5  | 5     |    |    |    |
|    | 1  | 4  | 6  | 5     |    |    |    |
|    | 5  | 4  | 6  | 5     |    |    |    |
|    | 4  | 6  | 7  | 5     |    |    |    |
|    | 4  | 6  | 8  | 5     |    |    |    |
|    | 7  | 6  | 8  | 5     |    |    |    |
|    | 6  | 8  | 9  | 5     |    |    |    |
|    | 6  | 8  | 10 | 5     |    |    |    |
|    | 6  | 8  | 11 | 5     |    |    |    |
|    | 9  | 8  | 10 | 5     |    |    |    |
|    | 9  | 8  | 11 | 5     |    |    |    |
|    | 10 | 8  | 11 | 5     |    |    |    |
|    | 8  | 11 | 12 | 5     |    |    |    |
|    | 8  | 11 | 13 | 5     |    |    |    |
|    | 8  | 11 | 14 | 5     |    |    |    |
|    | 12 | 11 | 13 | 5     |    |    |    |
|    | 12 | 11 | 14 | 5     |    |    |    |
|    | 13 | 11 | 14 | 5     |    |    |    |
|    | 11 | 14 | 15 | 5     |    |    |    |
|    | 11 | 14 | 16 | 5     |    |    |    |
|    | 11 | 14 | 17 | 5     |    |    |    |
|    | 15 | 14 | 16 | 5     |    |    |    |

|    |    |    |   |
|----|----|----|---|
| 15 | 14 | 17 | 5 |
| 16 | 14 | 17 | 5 |
| 14 | 17 | 18 | 5 |
| 14 | 17 | 22 | 5 |
| 14 | 17 | 26 | 5 |
| 18 | 17 | 22 | 5 |
| 18 | 17 | 26 | 5 |
| 22 | 17 | 26 | 5 |
| 17 | 18 | 19 | 5 |
| 17 | 18 | 20 | 5 |
| 17 | 18 | 21 | 5 |
| 19 | 18 | 20 | 5 |
| 19 | 18 | 21 | 5 |
| 20 | 18 | 21 | 5 |
| 17 | 22 | 23 | 5 |
| 17 | 22 | 24 | 5 |
| 17 | 22 | 25 | 5 |
| 23 | 22 | 24 | 5 |
| 23 | 22 | 25 | 5 |
| 24 | 22 | 25 | 5 |
| 17 | 26 | 27 | 5 |
| 17 | 26 | 28 | 5 |
| 17 | 26 | 29 | 5 |
| 27 | 26 | 28 | 5 |
| 27 | 26 | 29 | 5 |
| 28 | 26 | 29 | 5 |
| 1  | 30 | 31 | 5 |
| 1  | 30 | 32 | 5 |
| 1  | 30 | 35 | 5 |
| 31 | 30 | 32 | 5 |
| 31 | 30 | 35 | 5 |
| 32 | 30 | 35 | 5 |
| 30 | 32 | 33 | 5 |
| 30 | 32 | 34 | 5 |
| 33 | 32 | 34 | 5 |
| 30 | 35 | 36 | 5 |
| 30 | 35 | 37 | 5 |
| 30 | 35 | 38 | 5 |
| 36 | 35 | 37 | 5 |
| 36 | 35 | 38 | 5 |
| 37 | 35 | 38 | 5 |
| 35 | 38 | 39 | 5 |
| 35 | 38 | 40 | 5 |
| 39 | 38 | 65 | 5 |
| 39 | 38 | 40 | 5 |
| 39 | 38 | 65 | 5 |
| 40 | 38 | 65 | 5 |
| 38 | 40 | 41 | 5 |
| 38 | 40 | 42 | 5 |
| 38 | 40 | 43 | 5 |
| 41 | 40 | 42 | 5 |
| 41 | 40 | 43 | 5 |
| 42 | 40 | 43 | 5 |
| 40 | 43 | 44 | 5 |

|    |    |    |   |
|----|----|----|---|
| 40 | 43 | 45 | 5 |
| 40 | 43 | 46 | 5 |
| 44 | 43 | 45 | 5 |
| 44 | 43 | 46 | 5 |
| 45 | 43 | 46 | 5 |
| 43 | 46 | 47 | 5 |
| 43 | 46 | 48 | 5 |
| 43 | 46 | 49 | 5 |
| 47 | 46 | 48 | 5 |
| 47 | 46 | 49 | 5 |
| 48 | 46 | 49 | 5 |
| 46 | 49 | 50 | 5 |
| 46 | 49 | 51 | 5 |
| 46 | 49 | 52 | 5 |
| 50 | 49 | 51 | 5 |
| 50 | 49 | 52 | 5 |
| 51 | 49 | 52 | 5 |
| 49 | 52 | 53 | 5 |
| 49 | 52 | 54 | 5 |
| 49 | 52 | 55 | 5 |
| 53 | 52 | 54 | 5 |
| 53 | 52 | 55 | 5 |
| 54 | 52 | 55 | 5 |
| 52 | 55 | 56 | 5 |
| 52 | 55 | 57 | 5 |
| 52 | 55 | 58 | 5 |
| 56 | 55 | 57 | 5 |
| 56 | 55 | 58 | 5 |
| 57 | 55 | 58 | 5 |
| 55 | 58 | 59 | 5 |
| 55 | 58 | 60 | 5 |
| 55 | 58 | 61 | 5 |
| 59 | 58 | 60 | 5 |
| 59 | 58 | 61 | 5 |
| 60 | 58 | 61 | 5 |
| 58 | 61 | 62 | 5 |
| 58 | 61 | 63 | 5 |
| 58 | 61 | 64 | 5 |
| 62 | 61 | 63 | 5 |
| 62 | 61 | 64 | 5 |
| 63 | 61 | 64 | 5 |
| 38 | 65 | 66 | 5 |
| 38 | 65 | 67 | 5 |
| 38 | 65 | 93 | 5 |
| 66 | 65 | 67 | 5 |
| 66 | 65 | 93 | 5 |
| 67 | 65 | 93 | 5 |
| 65 | 67 | 68 | 5 |
| 65 | 67 | 69 | 5 |
| 68 | 67 | 69 | 5 |
| 67 | 69 | 70 | 5 |
| 67 | 69 | 71 | 5 |
| 70 | 69 | 71 | 5 |
| 69 | 71 | 72 | 5 |

|    |    |     |   |
|----|----|-----|---|
| 69 | 71 | 73  | 5 |
| 69 | 71 | 74  | 5 |
| 72 | 71 | 73  | 5 |
| 72 | 71 | 74  | 5 |
| 73 | 71 | 74  | 5 |
| 71 | 74 | 75  | 5 |
| 71 | 74 | 76  | 5 |
| 71 | 74 | 77  | 5 |
| 75 | 74 | 76  | 5 |
| 75 | 74 | 77  | 5 |
| 76 | 74 | 77  | 5 |
| 74 | 77 | 78  | 5 |
| 74 | 77 | 79  | 5 |
| 74 | 77 | 80  | 5 |
| 78 | 77 | 79  | 5 |
| 78 | 77 | 80  | 5 |
| 79 | 77 | 80  | 5 |
| 77 | 80 | 81  | 5 |
| 77 | 80 | 85  | 5 |
| 77 | 80 | 89  | 5 |
| 81 | 80 | 85  | 5 |
| 81 | 80 | 89  | 5 |
| 85 | 80 | 89  | 5 |
| 80 | 81 | 82  | 5 |
| 80 | 81 | 83  | 5 |
| 80 | 81 | 84  | 5 |
| 82 | 81 | 83  | 5 |
| 82 | 81 | 84  | 5 |
| 83 | 81 | 84  | 5 |
| 80 | 85 | 86  | 5 |
| 80 | 85 | 87  | 5 |
| 80 | 85 | 88  | 5 |
| 86 | 85 | 87  | 5 |
| 86 | 85 | 88  | 5 |
| 87 | 85 | 88  | 5 |
| 80 | 89 | 90  | 5 |
| 80 | 89 | 91  | 5 |
| 80 | 89 | 92  | 5 |
| 90 | 89 | 91  | 5 |
| 90 | 89 | 92  | 5 |
| 91 | 89 | 92  | 5 |
| 65 | 93 | 94  | 5 |
| 65 | 93 | 95  | 5 |
| 65 | 93 | 98  | 5 |
| 94 | 93 | 95  | 5 |
| 94 | 93 | 98  | 5 |
| 95 | 93 | 98  | 5 |
| 93 | 95 | 96  | 5 |
| 93 | 95 | 97  | 5 |
| 96 | 95 | 97  | 5 |
| 93 | 98 | 99  | 5 |
| 93 | 98 | 100 | 5 |
| 93 | 98 | 101 | 5 |
| 99 | 98 | 100 | 5 |

|     |     |     |   |
|-----|-----|-----|---|
| 99  | 98  | 101 | 5 |
| 100 | 98  | 101 | 5 |
| 98  | 101 | 102 | 5 |
| 98  | 101 | 103 | 5 |
| 98  | 101 | 128 | 5 |
| 102 | 101 | 103 | 5 |
| 102 | 101 | 128 | 5 |
| 103 | 101 | 128 | 5 |
| 101 | 103 | 104 | 5 |
| 101 | 103 | 105 | 5 |
| 101 | 103 | 106 | 5 |
| 104 | 103 | 105 | 5 |
| 104 | 103 | 106 | 5 |
| 105 | 103 | 106 | 5 |
| 103 | 106 | 107 | 5 |
| 103 | 106 | 108 | 5 |
| 103 | 106 | 109 | 5 |
| 107 | 106 | 108 | 5 |
| 107 | 106 | 109 | 5 |
| 108 | 106 | 109 | 5 |
| 106 | 109 | 110 | 5 |
| 106 | 109 | 111 | 5 |
| 106 | 109 | 112 | 5 |
| 110 | 109 | 111 | 5 |
| 110 | 109 | 112 | 5 |
| 111 | 109 | 112 | 5 |
| 109 | 112 | 113 | 5 |
| 109 | 112 | 114 | 5 |
| 109 | 112 | 115 | 5 |
| 113 | 112 | 114 | 5 |
| 113 | 112 | 115 | 5 |
| 114 | 112 | 115 | 5 |
| 112 | 115 | 116 | 5 |
| 112 | 115 | 117 | 5 |
| 112 | 115 | 118 | 5 |
| 116 | 115 | 117 | 5 |
| 116 | 115 | 118 | 5 |
| 117 | 115 | 118 | 5 |
| 115 | 118 | 119 | 5 |
| 115 | 118 | 120 | 5 |
| 115 | 118 | 121 | 5 |
| 119 | 118 | 120 | 5 |
| 119 | 118 | 121 | 5 |
| 120 | 118 | 121 | 5 |
| 118 | 121 | 122 | 5 |
| 118 | 121 | 123 | 5 |
| 118 | 121 | 124 | 5 |
| 122 | 121 | 123 | 5 |
| 122 | 121 | 124 | 5 |
| 123 | 121 | 124 | 5 |
| 121 | 124 | 125 | 5 |
| 121 | 124 | 126 | 5 |
| 121 | 124 | 127 | 5 |
| 125 | 124 | 126 | 5 |

|     |     |     |   |
|-----|-----|-----|---|
| 125 | 124 | 127 | 5 |
| 126 | 124 | 127 | 5 |
| 101 | 128 | 129 | 5 |
| 101 | 128 | 130 | 5 |
| 101 | 128 | 156 | 5 |
| 129 | 128 | 130 | 5 |
| 129 | 128 | 156 | 5 |
| 130 | 128 | 156 | 5 |
| 128 | 130 | 131 | 5 |
| 128 | 130 | 132 | 5 |
| 131 | 130 | 132 | 5 |
| 130 | 132 | 133 | 5 |
| 130 | 132 | 134 | 5 |
| 133 | 132 | 134 | 5 |
| 132 | 134 | 135 | 5 |
| 132 | 134 | 136 | 5 |
| 132 | 134 | 137 | 5 |
| 135 | 134 | 136 | 5 |
| 135 | 134 | 137 | 5 |
| 136 | 134 | 137 | 5 |
| 134 | 137 | 138 | 5 |
| 134 | 137 | 139 | 5 |
| 134 | 137 | 140 | 5 |
| 138 | 137 | 139 | 5 |
| 138 | 137 | 140 | 5 |
| 139 | 137 | 140 | 5 |
| 137 | 140 | 141 | 5 |
| 137 | 140 | 142 | 5 |
| 137 | 140 | 143 | 5 |
| 141 | 140 | 142 | 5 |
| 141 | 140 | 143 | 5 |
| 142 | 140 | 143 | 5 |
| 140 | 143 | 144 | 5 |
| 140 | 143 | 148 | 5 |
| 140 | 143 | 152 | 5 |
| 144 | 143 | 148 | 5 |
| 144 | 143 | 152 | 5 |
| 148 | 143 | 152 | 5 |
| 143 | 144 | 145 | 5 |
| 143 | 144 | 146 | 5 |
| 143 | 144 | 147 | 5 |
| 145 | 144 | 146 | 5 |
| 145 | 144 | 147 | 5 |
| 146 | 144 | 147 | 5 |
| 143 | 148 | 149 | 5 |
| 143 | 148 | 150 | 5 |
| 143 | 148 | 151 | 5 |
| 149 | 148 | 150 | 5 |
| 149 | 148 | 151 | 5 |
| 150 | 148 | 151 | 5 |
| 143 | 152 | 153 | 5 |
| 143 | 152 | 154 | 5 |
| 143 | 152 | 155 | 5 |
| 153 | 152 | 154 | 5 |

|     |     |     |   |
|-----|-----|-----|---|
| 153 | 152 | 155 | 5 |
| 154 | 152 | 155 | 5 |
| 128 | 156 | 157 | 5 |
| 128 | 156 | 158 | 5 |
| 128 | 156 | 161 | 5 |
| 157 | 156 | 158 | 5 |
| 157 | 156 | 161 | 5 |
| 158 | 156 | 161 | 5 |
| 156 | 158 | 159 | 5 |
| 156 | 158 | 160 | 5 |
| 159 | 158 | 160 | 5 |
| 156 | 161 | 162 | 5 |
| 156 | 161 | 163 | 5 |
| 156 | 161 | 164 | 5 |
| 162 | 161 | 163 | 5 |
| 162 | 161 | 164 | 5 |
| 163 | 161 | 164 | 5 |
| 161 | 164 | 165 | 5 |
| 161 | 164 | 166 | 5 |
| 161 | 164 | 191 | 5 |
| 165 | 164 | 166 | 5 |
| 165 | 164 | 191 | 5 |
| 166 | 164 | 191 | 5 |
| 164 | 166 | 167 | 5 |
| 164 | 166 | 168 | 5 |
| 164 | 166 | 169 | 5 |
| 167 | 166 | 168 | 5 |
| 167 | 166 | 169 | 5 |
| 168 | 166 | 169 | 5 |
| 166 | 169 | 170 | 5 |
| 166 | 169 | 171 | 5 |
| 166 | 169 | 172 | 5 |
| 170 | 169 | 171 | 5 |
| 170 | 169 | 172 | 5 |
| 171 | 169 | 172 | 5 |
| 169 | 172 | 173 | 5 |
| 169 | 172 | 174 | 5 |
| 169 | 172 | 175 | 5 |
| 173 | 172 | 174 | 5 |
| 173 | 172 | 175 | 5 |
| 174 | 172 | 175 | 5 |
| 172 | 175 | 176 | 5 |
| 172 | 175 | 177 | 5 |
| 172 | 175 | 178 | 5 |
| 176 | 175 | 177 | 5 |
| 176 | 175 | 178 | 5 |
| 177 | 175 | 178 | 5 |
| 175 | 178 | 179 | 5 |
| 175 | 178 | 180 | 5 |
| 175 | 178 | 181 | 5 |
| 179 | 178 | 180 | 5 |
| 179 | 178 | 181 | 5 |
| 180 | 178 | 181 | 5 |
| 178 | 181 | 182 | 5 |

|     |     |     |   |
|-----|-----|-----|---|
| 178 | 181 | 183 | 5 |
| 178 | 181 | 184 | 5 |
| 182 | 181 | 183 | 5 |
| 182 | 181 | 184 | 5 |
| 183 | 181 | 184 | 5 |
| 181 | 184 | 185 | 5 |
| 181 | 184 | 186 | 5 |
| 181 | 184 | 187 | 5 |
| 185 | 184 | 186 | 5 |
| 185 | 184 | 187 | 5 |
| 186 | 184 | 187 | 5 |
| 184 | 187 | 188 | 5 |
| 184 | 187 | 189 | 5 |
| 184 | 187 | 190 | 5 |
| 188 | 187 | 189 | 5 |
| 188 | 187 | 190 | 5 |
| 189 | 187 | 190 | 5 |
| 164 | 191 | 192 | 5 |
| 164 | 191 | 193 | 5 |
| 164 | 191 | 219 | 5 |
| 192 | 191 | 193 | 5 |
| 192 | 191 | 219 | 5 |
| 193 | 191 | 219 | 5 |
| 191 | 193 | 194 | 5 |
| 191 | 193 | 195 | 5 |
| 194 | 193 | 195 | 5 |
| 193 | 195 | 196 | 5 |
| 193 | 195 | 197 | 5 |
| 196 | 195 | 197 | 5 |
| 195 | 197 | 198 | 5 |
| 195 | 197 | 199 | 5 |
| 195 | 197 | 200 | 5 |
| 198 | 197 | 199 | 5 |
| 198 | 197 | 200 | 5 |
| 199 | 197 | 200 | 5 |
| 197 | 200 | 201 | 5 |
| 197 | 200 | 202 | 5 |
| 197 | 200 | 203 | 5 |
| 201 | 200 | 202 | 5 |
| 201 | 200 | 203 | 5 |
| 202 | 200 | 203 | 5 |
| 200 | 203 | 204 | 5 |
| 200 | 203 | 205 | 5 |
| 200 | 203 | 206 | 5 |
| 204 | 203 | 205 | 5 |
| 204 | 203 | 206 | 5 |
| 205 | 203 | 206 | 5 |
| 203 | 206 | 207 | 5 |
| 203 | 206 | 211 | 5 |
| 203 | 206 | 215 | 5 |
| 207 | 206 | 211 | 5 |
| 207 | 206 | 215 | 5 |
| 211 | 206 | 215 | 5 |
| 206 | 207 | 208 | 5 |



|     |     |     |   |
|-----|-----|-----|---|
| 206 | 207 | 209 | 5 |
| 206 | 207 | 210 | 5 |
| 208 | 207 | 209 | 5 |
| 208 | 207 | 210 | 5 |
| 209 | 207 | 210 | 5 |
| 206 | 211 | 212 | 5 |
| 206 | 211 | 213 | 5 |
| 206 | 211 | 214 | 5 |
| 212 | 211 | 213 | 5 |
| 212 | 211 | 214 | 5 |
| 213 | 211 | 214 | 5 |
| 206 | 215 | 216 | 5 |
| 206 | 215 | 217 | 5 |
| 206 | 215 | 218 | 5 |
| 216 | 215 | 217 | 5 |
| 216 | 215 | 218 | 5 |
| 217 | 215 | 218 | 5 |
| 191 | 219 | 220 | 5 |
| 191 | 219 | 221 | 5 |
| 191 | 219 | 224 | 5 |
| 220 | 219 | 221 | 5 |
| 220 | 219 | 224 | 5 |
| 221 | 219 | 224 | 5 |
| 219 | 221 | 222 | 5 |
| 219 | 221 | 223 | 5 |
| 222 | 221 | 223 | 5 |
| 219 | 224 | 225 | 5 |
| 219 | 224 | 226 | 5 |
| 219 | 224 | 227 | 5 |
| 225 | 224 | 226 | 5 |
| 225 | 224 | 227 | 5 |
| 226 | 224 | 227 | 5 |
| 224 | 227 | 228 | 5 |
| 224 | 227 | 229 | 5 |
| 224 | 227 | 254 | 5 |
| 228 | 227 | 229 | 5 |
| 228 | 227 | 254 | 5 |
| 229 | 227 | 254 | 5 |
| 227 | 229 | 230 | 5 |
| 227 | 229 | 231 | 5 |
| 227 | 229 | 232 | 5 |
| 230 | 229 | 231 | 5 |
| 230 | 229 | 232 | 5 |
| 231 | 229 | 232 | 5 |
| 229 | 232 | 233 | 5 |
| 229 | 232 | 234 | 5 |
| 229 | 232 | 235 | 5 |
| 233 | 232 | 234 | 5 |
| 233 | 232 | 235 | 5 |
| 234 | 232 | 235 | 5 |
| 232 | 235 | 236 | 5 |
| 232 | 235 | 237 | 5 |
| 232 | 235 | 238 | 5 |
| 236 | 235 | 237 | 5 |

|     |     |     |   |
|-----|-----|-----|---|
| 236 | 235 | 238 | 5 |
| 237 | 235 | 238 | 5 |
| 235 | 238 | 239 | 5 |
| 235 | 238 | 240 | 5 |
| 235 | 238 | 241 | 5 |
| 239 | 238 | 240 | 5 |
| 239 | 238 | 241 | 5 |
| 240 | 238 | 241 | 5 |
| 238 | 241 | 242 | 5 |
| 238 | 241 | 243 | 5 |
| 238 | 241 | 244 | 5 |
| 242 | 241 | 243 | 5 |
| 242 | 241 | 244 | 5 |
| 243 | 241 | 244 | 5 |
| 241 | 244 | 245 | 5 |
| 241 | 244 | 246 | 5 |
| 241 | 244 | 247 | 5 |
| 245 | 244 | 246 | 5 |
| 245 | 244 | 247 | 5 |
| 246 | 244 | 247 | 5 |
| 244 | 247 | 248 | 5 |
| 244 | 247 | 249 | 5 |
| 244 | 247 | 250 | 5 |
| 248 | 247 | 249 | 5 |
| 248 | 247 | 250 | 5 |
| 249 | 247 | 250 | 5 |
| 247 | 250 | 251 | 5 |
| 247 | 250 | 252 | 5 |
| 247 | 250 | 253 | 5 |
| 251 | 250 | 252 | 5 |
| 251 | 250 | 253 | 5 |
| 252 | 250 | 253 | 5 |
| 227 | 254 | 255 | 5 |
| 227 | 254 | 256 | 5 |
| 227 | 254 | 282 | 5 |
| 255 | 254 | 256 | 5 |
| 255 | 254 | 282 | 5 |
| 256 | 254 | 282 | 5 |
| 254 | 256 | 257 | 5 |
| 254 | 256 | 258 | 5 |
| 257 | 256 | 258 | 5 |
| 256 | 258 | 259 | 5 |
| 256 | 258 | 260 | 5 |
| 259 | 258 | 260 | 5 |
| 258 | 260 | 261 | 5 |
| 258 | 260 | 262 | 5 |
| 258 | 260 | 263 | 5 |
| 261 | 260 | 262 | 5 |
| 261 | 260 | 263 | 5 |
| 262 | 260 | 263 | 5 |
| 260 | 263 | 264 | 5 |
| 260 | 263 | 265 | 5 |
| 260 | 263 | 266 | 5 |
| 264 | 263 | 265 | 5 |

|     |     |     |   |
|-----|-----|-----|---|
| 264 | 263 | 266 | 5 |
| 265 | 263 | 266 | 5 |
| 263 | 266 | 267 | 5 |
| 263 | 266 | 268 | 5 |
| 263 | 266 | 269 | 5 |
| 267 | 266 | 268 | 5 |
| 267 | 266 | 269 | 5 |
| 268 | 266 | 269 | 5 |
| 266 | 269 | 270 | 5 |
| 266 | 269 | 274 | 5 |
| 266 | 269 | 278 | 5 |
| 270 | 269 | 274 | 5 |
| 270 | 269 | 278 | 5 |
| 274 | 269 | 278 | 5 |
| 269 | 270 | 271 | 5 |
| 269 | 270 | 272 | 5 |
| 269 | 270 | 273 | 5 |
| 271 | 270 | 272 | 5 |
| 271 | 270 | 273 | 5 |
| 272 | 270 | 273 | 5 |
| 269 | 274 | 275 | 5 |
| 269 | 274 | 276 | 5 |
| 269 | 274 | 277 | 5 |
| 275 | 274 | 276 | 5 |
| 275 | 274 | 277 | 5 |
| 276 | 274 | 277 | 5 |
| 269 | 278 | 279 | 5 |
| 269 | 278 | 280 | 5 |
| 269 | 278 | 281 | 5 |
| 279 | 278 | 280 | 5 |
| 279 | 278 | 281 | 5 |
| 280 | 278 | 281 | 5 |
| 254 | 282 | 283 | 5 |
| 254 | 282 | 284 | 5 |
| 254 | 282 | 287 | 5 |
| 283 | 282 | 284 | 5 |
| 283 | 282 | 287 | 5 |
| 284 | 282 | 287 | 5 |
| 282 | 284 | 285 | 5 |
| 282 | 284 | 286 | 5 |
| 285 | 284 | 286 | 5 |
| 282 | 287 | 288 | 5 |
| 282 | 287 | 289 | 5 |
| 282 | 287 | 290 | 5 |
| 288 | 287 | 289 | 5 |
| 288 | 287 | 290 | 5 |
| 289 | 287 | 290 | 5 |
| 287 | 290 | 291 | 5 |
| 287 | 290 | 292 | 5 |
| 287 | 290 | 317 | 5 |
| 291 | 290 | 292 | 5 |
| 291 | 290 | 317 | 5 |
| 292 | 290 | 317 | 5 |
| 290 | 292 | 293 | 5 |

|     |     |     |   |
|-----|-----|-----|---|
| 290 | 292 | 294 | 5 |
| 290 | 292 | 295 | 5 |
| 293 | 292 | 294 | 5 |
| 293 | 292 | 295 | 5 |
| 294 | 292 | 295 | 5 |
| 292 | 295 | 296 | 5 |
| 292 | 295 | 297 | 5 |
| 292 | 295 | 298 | 5 |
| 296 | 295 | 297 | 5 |
| 296 | 295 | 298 | 5 |
| 297 | 295 | 298 | 5 |
| 295 | 298 | 299 | 5 |
| 295 | 298 | 300 | 5 |
| 295 | 298 | 301 | 5 |
| 299 | 298 | 300 | 5 |
| 299 | 298 | 301 | 5 |
| 300 | 298 | 301 | 5 |
| 298 | 301 | 302 | 5 |
| 298 | 301 | 303 | 5 |
| 298 | 301 | 304 | 5 |
| 302 | 301 | 303 | 5 |
| 302 | 301 | 304 | 5 |
| 303 | 301 | 304 | 5 |
| 301 | 304 | 305 | 5 |
| 301 | 304 | 306 | 5 |
| 301 | 304 | 307 | 5 |
| 305 | 304 | 306 | 5 |
| 305 | 304 | 307 | 5 |
| 306 | 304 | 307 | 5 |
| 304 | 307 | 308 | 5 |
| 304 | 307 | 309 | 5 |
| 304 | 307 | 310 | 5 |
| 308 | 307 | 309 | 5 |
| 308 | 307 | 310 | 5 |
| 309 | 307 | 310 | 5 |
| 307 | 310 | 311 | 5 |
| 307 | 310 | 312 | 5 |
| 307 | 310 | 313 | 5 |
| 311 | 310 | 312 | 5 |
| 311 | 310 | 313 | 5 |
| 312 | 310 | 313 | 5 |
| 310 | 313 | 314 | 5 |
| 310 | 313 | 315 | 5 |
| 310 | 313 | 316 | 5 |
| 314 | 313 | 315 | 5 |
| 314 | 313 | 316 | 5 |
| 315 | 313 | 316 | 5 |
| 290 | 317 | 318 | 5 |
| 290 | 317 | 319 | 5 |
| 290 | 317 | 345 | 5 |
| 318 | 317 | 319 | 5 |
| 318 | 317 | 345 | 5 |
| 319 | 317 | 345 | 5 |
| 317 | 319 | 320 | 5 |

|     |     |     |   |
|-----|-----|-----|---|
| 317 | 319 | 321 | 5 |
| 320 | 319 | 321 | 5 |
| 319 | 321 | 322 | 5 |
| 319 | 321 | 323 | 5 |
| 322 | 321 | 323 | 5 |
| 321 | 323 | 324 | 5 |
| 321 | 323 | 325 | 5 |
| 321 | 323 | 326 | 5 |
| 324 | 323 | 325 | 5 |
| 324 | 323 | 326 | 5 |
| 325 | 323 | 326 | 5 |
| 323 | 326 | 327 | 5 |
| 323 | 326 | 328 | 5 |
| 323 | 326 | 329 | 5 |
| 327 | 326 | 328 | 5 |
| 327 | 326 | 329 | 5 |
| 328 | 326 | 329 | 5 |
| 326 | 329 | 330 | 5 |
| 326 | 329 | 331 | 5 |
| 326 | 329 | 332 | 5 |
| 330 | 329 | 331 | 5 |
| 330 | 329 | 332 | 5 |
| 331 | 329 | 332 | 5 |
| 329 | 332 | 333 | 5 |
| 329 | 332 | 337 | 5 |
| 329 | 332 | 341 | 5 |
| 333 | 332 | 337 | 5 |
| 333 | 332 | 341 | 5 |
| 337 | 332 | 341 | 5 |
| 332 | 333 | 334 | 5 |
| 332 | 333 | 335 | 5 |
| 332 | 333 | 336 | 5 |
| 334 | 333 | 335 | 5 |
| 334 | 333 | 336 | 5 |
| 335 | 333 | 336 | 5 |
| 332 | 337 | 338 | 5 |
| 332 | 337 | 339 | 5 |
| 332 | 337 | 340 | 5 |
| 338 | 337 | 339 | 5 |
| 338 | 337 | 340 | 5 |
| 339 | 337 | 340 | 5 |
| 332 | 341 | 342 | 5 |
| 332 | 341 | 343 | 5 |
| 332 | 341 | 344 | 5 |
| 342 | 341 | 343 | 5 |
| 342 | 341 | 344 | 5 |
| 343 | 341 | 344 | 5 |
| 317 | 345 | 346 | 5 |
| 317 | 345 | 347 | 5 |
| 317 | 345 | 350 | 5 |
| 346 | 345 | 347 | 5 |
| 346 | 345 | 350 | 5 |
| 347 | 345 | 350 | 5 |
| 345 | 347 | 348 | 5 |

|     |     |     |   |
|-----|-----|-----|---|
| 345 | 347 | 349 | 5 |
| 348 | 347 | 349 | 5 |
| 345 | 350 | 351 | 5 |
| 345 | 350 | 352 | 5 |
| 345 | 350 | 353 | 5 |
| 351 | 350 | 352 | 5 |
| 351 | 350 | 353 | 5 |
| 352 | 350 | 353 | 5 |
| 350 | 353 | 354 | 5 |
| 350 | 353 | 355 | 5 |
| 350 | 353 | 380 | 5 |
| 354 | 353 | 355 | 5 |
| 354 | 353 | 380 | 5 |
| 355 | 353 | 380 | 5 |
| 353 | 355 | 356 | 5 |
| 353 | 355 | 357 | 5 |
| 353 | 355 | 358 | 5 |
| 356 | 355 | 357 | 5 |
| 356 | 355 | 358 | 5 |
| 357 | 355 | 358 | 5 |
| 355 | 358 | 359 | 5 |
| 355 | 358 | 360 | 5 |
| 355 | 358 | 361 | 5 |
| 359 | 358 | 360 | 5 |
| 359 | 358 | 361 | 5 |
| 360 | 358 | 361 | 5 |
| 358 | 361 | 362 | 5 |
| 358 | 361 | 363 | 5 |
| 358 | 361 | 364 | 5 |
| 362 | 361 | 363 | 5 |
| 362 | 361 | 364 | 5 |
| 363 | 361 | 364 | 5 |
| 361 | 364 | 365 | 5 |
| 361 | 364 | 366 | 5 |
| 361 | 364 | 367 | 5 |
| 365 | 364 | 366 | 5 |
| 365 | 364 | 367 | 5 |
| 366 | 364 | 367 | 5 |
| 364 | 367 | 368 | 5 |
| 364 | 367 | 369 | 5 |
| 364 | 367 | 370 | 5 |
| 368 | 367 | 369 | 5 |
| 368 | 367 | 370 | 5 |
| 369 | 367 | 370 | 5 |
| 367 | 370 | 371 | 5 |
| 367 | 370 | 372 | 5 |
| 367 | 370 | 373 | 5 |
| 371 | 370 | 372 | 5 |
| 371 | 370 | 373 | 5 |
| 372 | 370 | 373 | 5 |
| 370 | 373 | 374 | 5 |
| 370 | 373 | 375 | 5 |
| 370 | 373 | 376 | 5 |
| 374 | 373 | 375 | 5 |

|     |     |     |   |
|-----|-----|-----|---|
| 374 | 373 | 376 | 5 |
| 375 | 373 | 376 | 5 |
| 373 | 376 | 377 | 5 |
| 373 | 376 | 378 | 5 |
| 373 | 376 | 379 | 5 |
| 377 | 376 | 378 | 5 |
| 377 | 376 | 379 | 5 |
| 378 | 376 | 379 | 5 |
| 353 | 380 | 381 | 5 |
| 353 | 380 | 382 | 5 |
| 353 | 380 | 408 | 5 |
| 381 | 380 | 382 | 5 |
| 381 | 380 | 408 | 5 |
| 382 | 380 | 408 | 5 |
| 380 | 382 | 383 | 5 |
| 380 | 382 | 384 | 5 |
| 383 | 382 | 384 | 5 |
| 382 | 384 | 385 | 5 |
| 382 | 384 | 386 | 5 |
| 385 | 384 | 386 | 5 |
| 384 | 386 | 387 | 5 |
| 384 | 386 | 388 | 5 |
| 384 | 386 | 389 | 5 |
| 387 | 386 | 388 | 5 |
| 387 | 386 | 389 | 5 |
| 388 | 386 | 389 | 5 |
| 386 | 389 | 390 | 5 |
| 386 | 389 | 391 | 5 |
| 386 | 389 | 392 | 5 |
| 390 | 389 | 391 | 5 |
| 390 | 389 | 392 | 5 |
| 391 | 389 | 392 | 5 |
| 389 | 392 | 393 | 5 |
| 389 | 392 | 394 | 5 |
| 389 | 392 | 395 | 5 |
| 393 | 392 | 394 | 5 |
| 393 | 392 | 395 | 5 |
| 394 | 392 | 395 | 5 |
| 392 | 395 | 396 | 5 |
| 392 | 395 | 400 | 5 |
| 392 | 395 | 404 | 5 |
| 396 | 395 | 400 | 5 |
| 396 | 395 | 404 | 5 |
| 400 | 395 | 404 | 5 |
| 395 | 396 | 397 | 5 |
| 395 | 396 | 398 | 5 |
| 395 | 396 | 399 | 5 |
| 397 | 396 | 398 | 5 |
| 397 | 396 | 399 | 5 |
| 398 | 396 | 399 | 5 |
| 395 | 400 | 401 | 5 |
| 395 | 400 | 402 | 5 |
| 395 | 400 | 403 | 5 |
| 401 | 400 | 402 | 5 |

|     |     |     |   |
|-----|-----|-----|---|
| 401 | 400 | 403 | 5 |
| 402 | 400 | 403 | 5 |
| 395 | 404 | 405 | 5 |
| 395 | 404 | 406 | 5 |
| 395 | 404 | 407 | 5 |
| 405 | 404 | 406 | 5 |
| 405 | 404 | 407 | 5 |
| 406 | 404 | 407 | 5 |
| 380 | 408 | 409 | 5 |
| 380 | 408 | 410 | 5 |
| 380 | 408 | 413 | 5 |
| 409 | 408 | 410 | 5 |
| 409 | 408 | 413 | 5 |
| 410 | 408 | 413 | 5 |
| 408 | 410 | 411 | 5 |
| 408 | 410 | 412 | 5 |
| 411 | 410 | 412 | 5 |
| 408 | 413 | 414 | 5 |
| 408 | 413 | 415 | 5 |
| 408 | 413 | 416 | 5 |
| 414 | 413 | 415 | 5 |
| 414 | 413 | 416 | 5 |
| 415 | 413 | 416 | 5 |
| 413 | 416 | 417 | 5 |
| 413 | 416 | 418 | 5 |
| 413 | 416 | 443 | 5 |
| 417 | 416 | 418 | 5 |
| 417 | 416 | 443 | 5 |
| 418 | 416 | 443 | 5 |
| 416 | 418 | 419 | 5 |
| 416 | 418 | 420 | 5 |
| 416 | 418 | 421 | 5 |
| 419 | 418 | 420 | 5 |
| 419 | 418 | 421 | 5 |
| 420 | 418 | 421 | 5 |
| 418 | 421 | 422 | 5 |
| 418 | 421 | 423 | 5 |
| 418 | 421 | 424 | 5 |
| 422 | 421 | 423 | 5 |
| 422 | 421 | 424 | 5 |
| 423 | 421 | 424 | 5 |
| 421 | 424 | 425 | 5 |
| 421 | 424 | 426 | 5 |
| 421 | 424 | 427 | 5 |
| 425 | 424 | 426 | 5 |
| 425 | 424 | 427 | 5 |
| 426 | 424 | 427 | 5 |
| 424 | 427 | 428 | 5 |
| 424 | 427 | 429 | 5 |
| 424 | 427 | 430 | 5 |
| 428 | 427 | 429 | 5 |
| 428 | 427 | 430 | 5 |
| 429 | 427 | 430 | 5 |
| 427 | 430 | 431 | 5 |



|     |     |     |   |
|-----|-----|-----|---|
| 427 | 430 | 432 | 5 |
| 427 | 430 | 433 | 5 |
| 431 | 430 | 432 | 5 |
| 431 | 430 | 433 | 5 |
| 432 | 430 | 433 | 5 |
| 430 | 433 | 434 | 5 |
| 430 | 433 | 435 | 5 |
| 430 | 433 | 436 | 5 |
| 434 | 433 | 435 | 5 |
| 434 | 433 | 436 | 5 |
| 435 | 433 | 436 | 5 |
| 433 | 436 | 437 | 5 |
| 433 | 436 | 438 | 5 |
| 433 | 436 | 439 | 5 |
| 437 | 436 | 438 | 5 |
| 437 | 436 | 439 | 5 |
| 438 | 436 | 439 | 5 |
| 436 | 439 | 440 | 5 |
| 436 | 439 | 441 | 5 |
| 436 | 439 | 442 | 5 |
| 440 | 439 | 441 | 5 |
| 440 | 439 | 442 | 5 |
| 441 | 439 | 442 | 5 |
| 416 | 443 | 444 | 5 |
| 416 | 443 | 445 | 5 |
| 416 | 443 | 471 | 5 |
| 444 | 443 | 445 | 5 |
| 444 | 443 | 471 | 5 |
| 445 | 443 | 471 | 5 |
| 443 | 445 | 446 | 5 |
| 443 | 445 | 447 | 5 |
| 446 | 445 | 447 | 5 |
| 445 | 447 | 448 | 5 |
| 445 | 447 | 449 | 5 |
| 448 | 447 | 449 | 5 |
| 447 | 449 | 450 | 5 |
| 447 | 449 | 451 | 5 |
| 447 | 449 | 452 | 5 |
| 450 | 449 | 451 | 5 |
| 450 | 449 | 452 | 5 |
| 451 | 449 | 452 | 5 |
| 449 | 452 | 453 | 5 |
| 449 | 452 | 454 | 5 |
| 449 | 452 | 455 | 5 |
| 453 | 452 | 454 | 5 |
| 453 | 452 | 455 | 5 |
| 454 | 452 | 455 | 5 |
| 452 | 455 | 456 | 5 |
| 452 | 455 | 457 | 5 |
| 452 | 455 | 458 | 5 |
| 456 | 455 | 457 | 5 |
| 456 | 455 | 458 | 5 |
| 457 | 455 | 458 | 5 |
| 455 | 458 | 459 | 5 |

|     |     |     |   |
|-----|-----|-----|---|
| 455 | 458 | 463 | 5 |
| 455 | 458 | 467 | 5 |
| 459 | 458 | 463 | 5 |
| 459 | 458 | 467 | 5 |
| 463 | 458 | 467 | 5 |
| 458 | 459 | 460 | 5 |
| 458 | 459 | 461 | 5 |
| 458 | 459 | 462 | 5 |
| 460 | 459 | 461 | 5 |
| 460 | 459 | 462 | 5 |
| 461 | 459 | 462 | 5 |
| 458 | 463 | 464 | 5 |
| 458 | 463 | 465 | 5 |
| 458 | 463 | 466 | 5 |
| 464 | 463 | 465 | 5 |
| 464 | 463 | 466 | 5 |
| 465 | 463 | 466 | 5 |
| 458 | 467 | 468 | 5 |
| 458 | 467 | 469 | 5 |
| 458 | 467 | 470 | 5 |
| 468 | 467 | 469 | 5 |
| 468 | 467 | 470 | 5 |
| 469 | 467 | 470 | 5 |
| 443 | 471 | 472 | 5 |
| 443 | 471 | 473 | 5 |
| 443 | 471 | 476 | 5 |
| 472 | 471 | 473 | 5 |
| 472 | 471 | 476 | 5 |
| 473 | 471 | 476 | 5 |
| 471 | 473 | 474 | 5 |
| 471 | 473 | 475 | 5 |
| 474 | 473 | 475 | 5 |
| 471 | 476 | 477 | 5 |
| 471 | 476 | 478 | 5 |
| 471 | 476 | 479 | 5 |
| 477 | 476 | 478 | 5 |
| 477 | 476 | 479 | 5 |
| 478 | 476 | 479 | 5 |
| 476 | 479 | 480 | 5 |
| 476 | 479 | 481 | 5 |
| 476 | 479 | 506 | 5 |
| 480 | 479 | 481 | 5 |
| 480 | 479 | 506 | 5 |
| 481 | 479 | 506 | 5 |
| 479 | 481 | 482 | 5 |
| 479 | 481 | 483 | 5 |
| 479 | 481 | 484 | 5 |
| 482 | 481 | 483 | 5 |
| 482 | 481 | 484 | 5 |
| 483 | 481 | 484 | 5 |
| 481 | 484 | 485 | 5 |
| 481 | 484 | 486 | 5 |
| 481 | 484 | 487 | 5 |
| 485 | 484 | 486 | 5 |

|     |     |     |   |
|-----|-----|-----|---|
| 485 | 484 | 487 | 5 |
| 486 | 484 | 487 | 5 |
| 484 | 487 | 488 | 5 |
| 484 | 487 | 489 | 5 |
| 484 | 487 | 490 | 5 |
| 488 | 487 | 489 | 5 |
| 488 | 487 | 490 | 5 |
| 489 | 487 | 490 | 5 |
| 487 | 490 | 491 | 5 |
| 487 | 490 | 492 | 5 |
| 487 | 490 | 493 | 5 |
| 491 | 490 | 492 | 5 |
| 491 | 490 | 493 | 5 |
| 492 | 490 | 493 | 5 |
| 490 | 493 | 494 | 5 |
| 490 | 493 | 495 | 5 |
| 490 | 493 | 496 | 5 |
| 494 | 493 | 495 | 5 |
| 494 | 493 | 496 | 5 |
| 495 | 493 | 496 | 5 |
| 493 | 496 | 497 | 5 |
| 493 | 496 | 498 | 5 |
| 493 | 496 | 499 | 5 |
| 497 | 496 | 498 | 5 |
| 497 | 496 | 499 | 5 |
| 498 | 496 | 499 | 5 |
| 496 | 499 | 500 | 5 |
| 496 | 499 | 501 | 5 |
| 496 | 499 | 502 | 5 |
| 500 | 499 | 501 | 5 |
| 500 | 499 | 502 | 5 |
| 501 | 499 | 502 | 5 |
| 499 | 502 | 503 | 5 |
| 499 | 502 | 504 | 5 |
| 499 | 502 | 505 | 5 |
| 503 | 502 | 504 | 5 |
| 503 | 502 | 505 | 5 |
| 504 | 502 | 505 | 5 |
| 479 | 506 | 507 | 5 |
| 479 | 506 | 508 | 5 |
| 479 | 506 | 534 | 5 |
| 507 | 506 | 508 | 5 |
| 507 | 506 | 534 | 5 |
| 508 | 506 | 534 | 5 |
| 506 | 508 | 509 | 5 |
| 506 | 508 | 510 | 5 |
| 509 | 508 | 510 | 5 |
| 508 | 510 | 511 | 5 |
| 508 | 510 | 512 | 5 |
| 511 | 510 | 512 | 5 |
| 510 | 512 | 513 | 5 |
| 510 | 512 | 514 | 5 |
| 510 | 512 | 515 | 5 |
| 513 | 512 | 514 | 5 |

|     |     |     |   |
|-----|-----|-----|---|
| 513 | 512 | 515 | 5 |
| 514 | 512 | 515 | 5 |
| 512 | 515 | 516 | 5 |
| 512 | 515 | 517 | 5 |
| 512 | 515 | 518 | 5 |
| 516 | 515 | 517 | 5 |
| 516 | 515 | 518 | 5 |
| 517 | 515 | 518 | 5 |
| 515 | 518 | 519 | 5 |
| 515 | 518 | 520 | 5 |
| 515 | 518 | 521 | 5 |
| 519 | 518 | 520 | 5 |
| 519 | 518 | 521 | 5 |
| 520 | 518 | 521 | 5 |
| 518 | 521 | 522 | 5 |
| 518 | 521 | 526 | 5 |
| 518 | 521 | 530 | 5 |
| 522 | 521 | 526 | 5 |
| 522 | 521 | 530 | 5 |
| 526 | 521 | 530 | 5 |
| 521 | 522 | 523 | 5 |
| 521 | 522 | 524 | 5 |
| 521 | 522 | 525 | 5 |
| 523 | 522 | 524 | 5 |
| 523 | 522 | 525 | 5 |
| 524 | 522 | 525 | 5 |
| 521 | 526 | 527 | 5 |
| 521 | 526 | 528 | 5 |
| 521 | 526 | 529 | 5 |
| 527 | 526 | 528 | 5 |
| 527 | 526 | 529 | 5 |
| 528 | 526 | 529 | 5 |
| 521 | 530 | 531 | 5 |
| 521 | 530 | 532 | 5 |
| 521 | 530 | 533 | 5 |
| 531 | 530 | 532 | 5 |
| 531 | 530 | 533 | 5 |
| 532 | 530 | 533 | 5 |
| 506 | 534 | 535 | 5 |
| 506 | 534 | 536 | 5 |
| 506 | 534 | 539 | 5 |
| 535 | 534 | 536 | 5 |
| 535 | 534 | 539 | 5 |
| 536 | 534 | 539 | 5 |
| 534 | 536 | 537 | 5 |
| 534 | 536 | 538 | 5 |
| 537 | 536 | 538 | 5 |
| 534 | 539 | 540 | 5 |
| 534 | 539 | 541 | 5 |
| 534 | 539 | 542 | 5 |
| 540 | 539 | 541 | 5 |
| 540 | 539 | 542 | 5 |
| 541 | 539 | 542 | 5 |
| 539 | 542 | 543 | 5 |

|     |     |     |   |
|-----|-----|-----|---|
| 539 | 542 | 544 | 5 |
| 539 | 542 | 569 | 5 |
| 543 | 542 | 544 | 5 |
| 543 | 542 | 569 | 5 |
| 544 | 542 | 569 | 5 |
| 542 | 544 | 545 | 5 |
| 542 | 544 | 546 | 5 |
| 542 | 544 | 547 | 5 |
| 545 | 544 | 546 | 5 |
| 545 | 544 | 547 | 5 |
| 546 | 544 | 547 | 5 |
| 544 | 547 | 548 | 5 |
| 544 | 547 | 549 | 5 |
| 544 | 547 | 550 | 5 |
| 548 | 547 | 549 | 5 |
| 548 | 547 | 550 | 5 |
| 549 | 547 | 550 | 5 |
| 547 | 550 | 551 | 5 |
| 547 | 550 | 552 | 5 |
| 547 | 550 | 553 | 5 |
| 551 | 550 | 552 | 5 |
| 551 | 550 | 553 | 5 |
| 552 | 550 | 553 | 5 |
| 550 | 553 | 554 | 5 |
| 550 | 553 | 555 | 5 |
| 550 | 553 | 556 | 5 |
| 554 | 553 | 555 | 5 |
| 554 | 553 | 556 | 5 |
| 555 | 553 | 556 | 5 |
| 553 | 556 | 557 | 5 |
| 553 | 556 | 558 | 5 |
| 553 | 556 | 559 | 5 |
| 557 | 556 | 558 | 5 |
| 557 | 556 | 559 | 5 |
| 558 | 556 | 559 | 5 |
| 556 | 559 | 560 | 5 |
| 556 | 559 | 561 | 5 |
| 556 | 559 | 562 | 5 |
| 560 | 559 | 561 | 5 |
| 560 | 559 | 562 | 5 |
| 561 | 559 | 562 | 5 |
| 559 | 562 | 563 | 5 |
| 559 | 562 | 564 | 5 |
| 559 | 562 | 565 | 5 |
| 563 | 562 | 564 | 5 |
| 563 | 562 | 565 | 5 |
| 564 | 562 | 565 | 5 |
| 562 | 565 | 566 | 5 |
| 562 | 565 | 567 | 5 |
| 562 | 565 | 568 | 5 |
| 566 | 565 | 567 | 5 |
| 566 | 565 | 568 | 5 |
| 567 | 565 | 568 | 5 |
| 542 | 569 | 570 | 5 |

|     |     |     |   |
|-----|-----|-----|---|
| 542 | 569 | 571 | 5 |
| 542 | 569 | 597 | 5 |
| 570 | 569 | 571 | 5 |
| 570 | 569 | 597 | 5 |
| 571 | 569 | 597 | 5 |
| 569 | 571 | 572 | 5 |
| 569 | 571 | 573 | 5 |
| 572 | 571 | 573 | 5 |
| 571 | 573 | 574 | 5 |
| 571 | 573 | 575 | 5 |
| 574 | 573 | 575 | 5 |
| 573 | 575 | 576 | 5 |
| 573 | 575 | 577 | 5 |
| 573 | 575 | 578 | 5 |
| 576 | 575 | 577 | 5 |
| 576 | 575 | 578 | 5 |
| 577 | 575 | 578 | 5 |
| 575 | 578 | 579 | 5 |
| 575 | 578 | 580 | 5 |
| 575 | 578 | 581 | 5 |
| 579 | 578 | 580 | 5 |
| 579 | 578 | 581 | 5 |
| 580 | 578 | 581 | 5 |
| 578 | 581 | 582 | 5 |
| 578 | 581 | 583 | 5 |
| 578 | 581 | 584 | 5 |
| 582 | 581 | 583 | 5 |
| 582 | 581 | 584 | 5 |
| 583 | 581 | 584 | 5 |
| 581 | 584 | 585 | 5 |
| 581 | 584 | 589 | 5 |
| 581 | 584 | 593 | 5 |
| 585 | 584 | 589 | 5 |
| 585 | 584 | 593 | 5 |
| 589 | 584 | 593 | 5 |
| 584 | 585 | 586 | 5 |
| 584 | 585 | 587 | 5 |
| 584 | 585 | 588 | 5 |
| 586 | 585 | 587 | 5 |
| 586 | 585 | 588 | 5 |
| 587 | 585 | 588 | 5 |
| 584 | 589 | 590 | 5 |
| 584 | 589 | 591 | 5 |
| 584 | 589 | 592 | 5 |
| 590 | 589 | 591 | 5 |
| 590 | 589 | 592 | 5 |
| 591 | 589 | 592 | 5 |
| 584 | 593 | 594 | 5 |
| 584 | 593 | 595 | 5 |
| 584 | 593 | 596 | 5 |
| 594 | 593 | 595 | 5 |
| 594 | 593 | 596 | 5 |
| 595 | 593 | 596 | 5 |
| 569 | 597 | 598 | 5 |

|     |     |     |   |
|-----|-----|-----|---|
| 569 | 597 | 599 | 5 |
| 569 | 597 | 602 | 5 |
| 598 | 597 | 599 | 5 |
| 598 | 597 | 602 | 5 |
| 599 | 597 | 602 | 5 |
| 597 | 599 | 600 | 5 |
| 597 | 599 | 601 | 5 |
| 600 | 599 | 601 | 5 |
| 597 | 602 | 603 | 5 |
| 597 | 602 | 604 | 5 |
| 597 | 602 | 605 | 5 |
| 603 | 602 | 604 | 5 |
| 603 | 602 | 605 | 5 |
| 604 | 602 | 605 | 5 |
| 602 | 605 | 606 | 5 |
| 602 | 605 | 607 | 5 |
| 602 | 605 | 632 | 5 |
| 606 | 605 | 607 | 5 |
| 606 | 605 | 632 | 5 |
| 607 | 605 | 632 | 5 |
| 605 | 607 | 608 | 5 |
| 605 | 607 | 609 | 5 |
| 605 | 607 | 610 | 5 |
| 608 | 607 | 609 | 5 |
| 608 | 607 | 610 | 5 |
| 609 | 607 | 610 | 5 |
| 607 | 610 | 611 | 5 |
| 607 | 610 | 612 | 5 |
| 607 | 610 | 613 | 5 |
| 611 | 610 | 612 | 5 |
| 611 | 610 | 613 | 5 |
| 612 | 610 | 613 | 5 |
| 610 | 613 | 614 | 5 |
| 610 | 613 | 615 | 5 |
| 610 | 613 | 616 | 5 |
| 614 | 613 | 615 | 5 |
| 614 | 613 | 616 | 5 |
| 615 | 613 | 616 | 5 |
| 613 | 616 | 617 | 5 |
| 613 | 616 | 618 | 5 |
| 613 | 616 | 619 | 5 |
| 617 | 616 | 618 | 5 |
| 617 | 616 | 619 | 5 |
| 618 | 616 | 619 | 5 |
| 616 | 619 | 620 | 5 |
| 616 | 619 | 621 | 5 |
| 616 | 619 | 622 | 5 |
| 620 | 619 | 621 | 5 |
| 620 | 619 | 622 | 5 |
| 621 | 619 | 622 | 5 |
| 619 | 622 | 623 | 5 |
| 619 | 622 | 624 | 5 |
| 619 | 622 | 625 | 5 |
| 623 | 622 | 624 | 5 |

|     |     |     |   |
|-----|-----|-----|---|
| 623 | 622 | 625 | 5 |
| 624 | 622 | 625 | 5 |
| 622 | 625 | 626 | 5 |
| 622 | 625 | 627 | 5 |
| 622 | 625 | 628 | 5 |
| 626 | 625 | 627 | 5 |
| 626 | 625 | 628 | 5 |
| 627 | 625 | 628 | 5 |
| 625 | 628 | 629 | 5 |
| 625 | 628 | 630 | 5 |
| 625 | 628 | 631 | 5 |
| 629 | 628 | 630 | 5 |
| 629 | 628 | 631 | 5 |
| 630 | 628 | 631 | 5 |
| 605 | 632 | 633 | 5 |
| 605 | 632 | 634 | 5 |
| 605 | 632 | 660 | 5 |
| 633 | 632 | 634 | 5 |
| 633 | 632 | 660 | 5 |
| 634 | 632 | 660 | 5 |
| 632 | 634 | 635 | 5 |
| 632 | 634 | 636 | 5 |
| 635 | 634 | 636 | 5 |
| 634 | 636 | 637 | 5 |
| 634 | 636 | 638 | 5 |
| 637 | 636 | 638 | 5 |
| 636 | 638 | 639 | 5 |
| 636 | 638 | 640 | 5 |
| 636 | 638 | 641 | 5 |
| 639 | 638 | 640 | 5 |
| 639 | 638 | 641 | 5 |
| 640 | 638 | 641 | 5 |
| 638 | 641 | 642 | 5 |
| 638 | 641 | 643 | 5 |
| 638 | 641 | 644 | 5 |
| 642 | 641 | 643 | 5 |
| 642 | 641 | 644 | 5 |
| 643 | 641 | 644 | 5 |
| 641 | 644 | 645 | 5 |
| 641 | 644 | 646 | 5 |
| 641 | 644 | 647 | 5 |
| 645 | 644 | 646 | 5 |
| 645 | 644 | 647 | 5 |
| 646 | 644 | 647 | 5 |
| 644 | 647 | 648 | 5 |
| 644 | 647 | 652 | 5 |
| 644 | 647 | 656 | 5 |
| 648 | 647 | 652 | 5 |
| 648 | 647 | 656 | 5 |
| 652 | 647 | 656 | 5 |
| 647 | 648 | 649 | 5 |
| 647 | 648 | 650 | 5 |
| 647 | 648 | 651 | 5 |
| 649 | 648 | 650 | 5 |



|     |     |     |   |
|-----|-----|-----|---|
| 649 | 648 | 651 | 5 |
| 650 | 648 | 651 | 5 |
| 647 | 652 | 653 | 5 |
| 647 | 652 | 654 | 5 |
| 647 | 652 | 655 | 5 |
| 653 | 652 | 654 | 5 |
| 653 | 652 | 655 | 5 |
| 654 | 652 | 655 | 5 |
| 647 | 656 | 657 | 5 |
| 647 | 656 | 658 | 5 |
| 647 | 656 | 659 | 5 |
| 657 | 656 | 658 | 5 |
| 657 | 656 | 659 | 5 |
| 658 | 656 | 659 | 5 |
| 632 | 660 | 661 | 5 |
| 632 | 660 | 662 | 5 |
| 632 | 660 | 665 | 5 |
| 661 | 660 | 662 | 5 |
| 661 | 660 | 665 | 5 |
| 662 | 660 | 665 | 5 |
| 660 | 662 | 663 | 5 |
| 660 | 662 | 664 | 5 |
| 663 | 662 | 664 | 5 |
| 660 | 665 | 666 | 5 |
| 660 | 665 | 667 | 5 |
| 660 | 665 | 668 | 5 |
| 666 | 665 | 667 | 5 |
| 666 | 665 | 668 | 5 |
| 667 | 665 | 668 | 5 |
| 665 | 668 | 669 | 5 |
| 665 | 668 | 670 | 5 |
| 665 | 668 | 695 | 5 |
| 669 | 668 | 670 | 5 |
| 669 | 668 | 695 | 5 |
| 670 | 668 | 695 | 5 |
| 668 | 670 | 671 | 5 |
| 668 | 670 | 672 | 5 |
| 668 | 670 | 673 | 5 |
| 671 | 670 | 672 | 5 |
| 671 | 670 | 673 | 5 |
| 672 | 670 | 673 | 5 |
| 670 | 673 | 674 | 5 |
| 670 | 673 | 675 | 5 |
| 670 | 673 | 676 | 5 |
| 674 | 673 | 675 | 5 |
| 674 | 673 | 676 | 5 |
| 675 | 673 | 676 | 5 |
| 673 | 676 | 677 | 5 |
| 673 | 676 | 678 | 5 |
| 673 | 676 | 679 | 5 |
| 677 | 676 | 678 | 5 |
| 677 | 676 | 679 | 5 |
| 678 | 676 | 679 | 5 |
| 676 | 679 | 680 | 5 |

|     |     |     |   |
|-----|-----|-----|---|
| 676 | 679 | 681 | 5 |
| 676 | 679 | 682 | 5 |
| 680 | 679 | 681 | 5 |
| 680 | 679 | 682 | 5 |
| 681 | 679 | 682 | 5 |
| 679 | 682 | 683 | 5 |
| 679 | 682 | 684 | 5 |
| 679 | 682 | 685 | 5 |
| 683 | 682 | 684 | 5 |
| 683 | 682 | 685 | 5 |
| 684 | 682 | 685 | 5 |
| 682 | 685 | 686 | 5 |
| 682 | 685 | 687 | 5 |
| 682 | 685 | 688 | 5 |
| 686 | 685 | 687 | 5 |
| 686 | 685 | 688 | 5 |
| 687 | 685 | 688 | 5 |
| 685 | 688 | 689 | 5 |
| 685 | 688 | 690 | 5 |
| 685 | 688 | 691 | 5 |
| 689 | 688 | 690 | 5 |
| 689 | 688 | 691 | 5 |
| 690 | 688 | 691 | 5 |
| 688 | 691 | 692 | 5 |
| 688 | 691 | 693 | 5 |
| 688 | 691 | 694 | 5 |
| 692 | 691 | 693 | 5 |
| 692 | 691 | 694 | 5 |
| 693 | 691 | 694 | 5 |
| 668 | 695 | 696 | 5 |
| 668 | 695 | 697 | 5 |
| 668 | 695 | 723 | 5 |
| 696 | 695 | 697 | 5 |
| 696 | 695 | 723 | 5 |
| 697 | 695 | 723 | 5 |
| 695 | 697 | 698 | 5 |
| 695 | 697 | 699 | 5 |
| 698 | 697 | 699 | 5 |
| 697 | 699 | 700 | 5 |
| 697 | 699 | 701 | 5 |
| 700 | 699 | 701 | 5 |
| 699 | 701 | 702 | 5 |
| 699 | 701 | 703 | 5 |
| 699 | 701 | 704 | 5 |
| 702 | 701 | 703 | 5 |
| 702 | 701 | 704 | 5 |
| 703 | 701 | 704 | 5 |
| 701 | 704 | 705 | 5 |
| 701 | 704 | 706 | 5 |
| 701 | 704 | 707 | 5 |
| 705 | 704 | 706 | 5 |
| 705 | 704 | 707 | 5 |
| 706 | 704 | 707 | 5 |
| 704 | 707 | 708 | 5 |

|     |     |     |   |
|-----|-----|-----|---|
| 704 | 707 | 709 | 5 |
| 704 | 707 | 710 | 5 |
| 708 | 707 | 709 | 5 |
| 708 | 707 | 710 | 5 |
| 709 | 707 | 710 | 5 |
| 707 | 710 | 711 | 5 |
| 707 | 710 | 715 | 5 |
| 707 | 710 | 719 | 5 |
| 711 | 710 | 715 | 5 |
| 711 | 710 | 719 | 5 |
| 715 | 710 | 719 | 5 |
| 710 | 711 | 712 | 5 |
| 710 | 711 | 713 | 5 |
| 710 | 711 | 714 | 5 |
| 712 | 711 | 713 | 5 |
| 712 | 711 | 714 | 5 |
| 713 | 711 | 714 | 5 |
| 710 | 715 | 716 | 5 |
| 710 | 715 | 717 | 5 |
| 710 | 715 | 718 | 5 |
| 716 | 715 | 717 | 5 |
| 716 | 715 | 718 | 5 |
| 717 | 715 | 718 | 5 |
| 710 | 719 | 720 | 5 |
| 710 | 719 | 721 | 5 |
| 710 | 719 | 722 | 5 |
| 720 | 719 | 721 | 5 |
| 720 | 719 | 722 | 5 |
| 721 | 719 | 722 | 5 |
| 695 | 723 | 724 | 5 |
| 695 | 723 | 725 | 5 |
| 695 | 723 | 728 | 5 |
| 724 | 723 | 725 | 5 |
| 724 | 723 | 728 | 5 |
| 725 | 723 | 728 | 5 |
| 723 | 725 | 726 | 5 |
| 723 | 725 | 727 | 5 |
| 726 | 725 | 727 | 5 |
| 723 | 728 | 729 | 5 |
| 723 | 728 | 730 | 5 |
| 723 | 728 | 731 | 5 |
| 729 | 728 | 730 | 5 |
| 729 | 728 | 731 | 5 |
| 730 | 728 | 731 | 5 |
| 728 | 731 | 732 | 5 |
| 728 | 731 | 733 | 5 |
| 728 | 731 | 758 | 5 |
| 732 | 731 | 733 | 5 |
| 732 | 731 | 758 | 5 |
| 733 | 731 | 758 | 5 |
| 731 | 733 | 734 | 5 |
| 731 | 733 | 735 | 5 |
| 731 | 733 | 736 | 5 |
| 734 | 733 | 735 | 5 |

|     |     |     |   |
|-----|-----|-----|---|
| 734 | 733 | 736 | 5 |
| 735 | 733 | 736 | 5 |
| 733 | 736 | 737 | 5 |
| 733 | 736 | 738 | 5 |
| 733 | 736 | 739 | 5 |
| 737 | 736 | 738 | 5 |
| 737 | 736 | 739 | 5 |
| 738 | 736 | 739 | 5 |
| 736 | 739 | 740 | 5 |
| 736 | 739 | 741 | 5 |
| 736 | 739 | 742 | 5 |
| 740 | 739 | 741 | 5 |
| 740 | 739 | 742 | 5 |
| 741 | 739 | 742 | 5 |
| 739 | 742 | 743 | 5 |
| 739 | 742 | 744 | 5 |
| 739 | 742 | 745 | 5 |
| 743 | 742 | 744 | 5 |
| 743 | 742 | 745 | 5 |
| 744 | 742 | 745 | 5 |
| 742 | 745 | 746 | 5 |
| 742 | 745 | 747 | 5 |
| 742 | 745 | 748 | 5 |
| 746 | 745 | 747 | 5 |
| 746 | 745 | 748 | 5 |
| 747 | 745 | 748 | 5 |
| 745 | 748 | 749 | 5 |
| 745 | 748 | 750 | 5 |
| 745 | 748 | 751 | 5 |
| 749 | 748 | 750 | 5 |
| 749 | 748 | 751 | 5 |
| 750 | 748 | 751 | 5 |
| 748 | 751 | 752 | 5 |
| 748 | 751 | 753 | 5 |
| 748 | 751 | 754 | 5 |
| 752 | 751 | 753 | 5 |
| 752 | 751 | 754 | 5 |
| 753 | 751 | 754 | 5 |
| 751 | 754 | 755 | 5 |
| 751 | 754 | 756 | 5 |
| 751 | 754 | 757 | 5 |
| 755 | 754 | 756 | 5 |
| 755 | 754 | 757 | 5 |
| 756 | 754 | 757 | 5 |
| 731 | 758 | 759 | 5 |
| 731 | 758 | 760 | 5 |
| 731 | 758 | 786 | 5 |
| 759 | 758 | 760 | 5 |
| 759 | 758 | 786 | 5 |
| 760 | 758 | 786 | 5 |
| 758 | 760 | 761 | 5 |
| 758 | 760 | 762 | 5 |
| 761 | 760 | 762 | 5 |
| 760 | 762 | 763 | 5 |

|     |     |     |   |
|-----|-----|-----|---|
| 760 | 762 | 764 | 5 |
| 763 | 762 | 764 | 5 |
| 762 | 764 | 765 | 5 |
| 762 | 764 | 766 | 5 |
| 762 | 764 | 767 | 5 |
| 765 | 764 | 766 | 5 |
| 765 | 764 | 767 | 5 |
| 766 | 764 | 767 | 5 |
| 764 | 767 | 768 | 5 |
| 764 | 767 | 769 | 5 |
| 764 | 767 | 770 | 5 |
| 768 | 767 | 769 | 5 |
| 768 | 767 | 770 | 5 |
| 769 | 767 | 770 | 5 |
| 767 | 770 | 771 | 5 |
| 767 | 770 | 772 | 5 |
| 767 | 770 | 773 | 5 |
| 771 | 770 | 772 | 5 |
| 771 | 770 | 773 | 5 |
| 772 | 770 | 773 | 5 |
| 770 | 773 | 774 | 5 |
| 770 | 773 | 778 | 5 |
| 770 | 773 | 782 | 5 |
| 774 | 773 | 778 | 5 |
| 774 | 773 | 782 | 5 |
| 778 | 773 | 782 | 5 |
| 773 | 774 | 775 | 5 |
| 773 | 774 | 776 | 5 |
| 773 | 774 | 777 | 5 |
| 775 | 774 | 776 | 5 |
| 775 | 774 | 777 | 5 |
| 776 | 774 | 777 | 5 |
| 773 | 778 | 779 | 5 |
| 773 | 778 | 780 | 5 |
| 773 | 778 | 781 | 5 |
| 779 | 778 | 780 | 5 |
| 779 | 778 | 781 | 5 |
| 780 | 778 | 781 | 5 |
| 773 | 782 | 783 | 5 |
| 773 | 782 | 784 | 5 |
| 773 | 782 | 785 | 5 |
| 783 | 782 | 784 | 5 |
| 783 | 782 | 785 | 5 |
| 784 | 782 | 785 | 5 |
| 758 | 786 | 787 | 5 |
| 758 | 786 | 788 | 5 |
| 758 | 786 | 791 | 5 |
| 787 | 786 | 788 | 5 |
| 787 | 786 | 791 | 5 |
| 788 | 786 | 791 | 5 |
| 786 | 788 | 789 | 5 |
| 786 | 788 | 790 | 5 |
| 789 | 788 | 790 | 5 |
| 786 | 791 | 792 | 5 |

|     |     |     |   |
|-----|-----|-----|---|
| 786 | 791 | 793 | 5 |
| 786 | 791 | 794 | 5 |
| 792 | 791 | 793 | 5 |
| 792 | 791 | 794 | 5 |
| 793 | 791 | 794 | 5 |
| 791 | 794 | 795 | 5 |
| 791 | 794 | 796 | 5 |
| 791 | 794 | 821 | 5 |
| 795 | 794 | 796 | 5 |
| 795 | 794 | 821 | 5 |
| 796 | 794 | 821 | 5 |
| 794 | 796 | 797 | 5 |
| 794 | 796 | 798 | 5 |
| 794 | 796 | 799 | 5 |
| 797 | 796 | 798 | 5 |
| 797 | 796 | 799 | 5 |
| 798 | 796 | 799 | 5 |
| 796 | 799 | 800 | 5 |
| 796 | 799 | 801 | 5 |
| 796 | 799 | 802 | 5 |
| 800 | 799 | 801 | 5 |
| 800 | 799 | 802 | 5 |
| 801 | 799 | 802 | 5 |
| 799 | 802 | 803 | 5 |
| 799 | 802 | 804 | 5 |
| 799 | 802 | 805 | 5 |
| 803 | 802 | 804 | 5 |
| 803 | 802 | 805 | 5 |
| 804 | 802 | 805 | 5 |
| 802 | 805 | 806 | 5 |
| 802 | 805 | 807 | 5 |
| 802 | 805 | 808 | 5 |
| 806 | 805 | 807 | 5 |
| 806 | 805 | 808 | 5 |
| 807 | 805 | 808 | 5 |
| 805 | 808 | 809 | 5 |
| 805 | 808 | 810 | 5 |
| 805 | 808 | 811 | 5 |
| 809 | 808 | 810 | 5 |
| 809 | 808 | 811 | 5 |
| 810 | 808 | 811 | 5 |
| 808 | 811 | 812 | 5 |
| 808 | 811 | 813 | 5 |
| 808 | 811 | 814 | 5 |
| 812 | 811 | 813 | 5 |
| 812 | 811 | 814 | 5 |
| 813 | 811 | 814 | 5 |
| 811 | 814 | 815 | 5 |
| 811 | 814 | 816 | 5 |
| 811 | 814 | 817 | 5 |
| 815 | 814 | 816 | 5 |
| 815 | 814 | 817 | 5 |
| 816 | 814 | 817 | 5 |
| 814 | 817 | 818 | 5 |

|     |     |     |   |
|-----|-----|-----|---|
| 814 | 817 | 819 | 5 |
| 814 | 817 | 820 | 5 |
| 818 | 817 | 819 | 5 |
| 818 | 817 | 820 | 5 |
| 819 | 817 | 820 | 5 |
| 794 | 821 | 822 | 5 |
| 794 | 821 | 823 | 5 |
| 794 | 821 | 849 | 5 |
| 822 | 821 | 823 | 5 |
| 822 | 821 | 849 | 5 |
| 823 | 821 | 849 | 5 |
| 821 | 823 | 824 | 5 |
| 821 | 823 | 825 | 5 |
| 824 | 823 | 825 | 5 |
| 823 | 825 | 826 | 5 |
| 823 | 825 | 827 | 5 |
| 826 | 825 | 827 | 5 |
| 825 | 827 | 828 | 5 |
| 825 | 827 | 829 | 5 |
| 825 | 827 | 830 | 5 |
| 828 | 827 | 829 | 5 |
| 828 | 827 | 830 | 5 |
| 829 | 827 | 830 | 5 |
| 827 | 830 | 831 | 5 |
| 827 | 830 | 832 | 5 |
| 827 | 830 | 833 | 5 |
| 831 | 830 | 832 | 5 |
| 831 | 830 | 833 | 5 |
| 832 | 830 | 833 | 5 |
| 830 | 833 | 834 | 5 |
| 830 | 833 | 835 | 5 |
| 830 | 833 | 836 | 5 |
| 834 | 833 | 835 | 5 |
| 834 | 833 | 836 | 5 |
| 835 | 833 | 836 | 5 |
| 833 | 836 | 837 | 5 |
| 833 | 836 | 841 | 5 |
| 833 | 836 | 845 | 5 |
| 837 | 836 | 841 | 5 |
| 837 | 836 | 845 | 5 |
| 841 | 836 | 845 | 5 |
| 836 | 837 | 838 | 5 |
| 836 | 837 | 839 | 5 |
| 836 | 837 | 840 | 5 |
| 838 | 837 | 839 | 5 |
| 838 | 837 | 840 | 5 |
| 839 | 837 | 840 | 5 |
| 836 | 841 | 842 | 5 |
| 836 | 841 | 843 | 5 |
| 836 | 841 | 844 | 5 |
| 842 | 841 | 843 | 5 |
| 842 | 841 | 844 | 5 |
| 843 | 841 | 844 | 5 |
| 836 | 845 | 846 | 5 |

|     |     |     |   |
|-----|-----|-----|---|
| 836 | 845 | 847 | 5 |
| 836 | 845 | 848 | 5 |
| 846 | 845 | 847 | 5 |
| 846 | 845 | 848 | 5 |
| 847 | 845 | 848 | 5 |
| 821 | 849 | 850 | 5 |
| 821 | 849 | 851 | 5 |
| 821 | 849 | 854 | 5 |
| 850 | 849 | 851 | 5 |
| 850 | 849 | 854 | 5 |
| 851 | 849 | 854 | 5 |
| 849 | 851 | 852 | 5 |
| 849 | 851 | 853 | 5 |
| 852 | 851 | 853 | 5 |
| 849 | 854 | 855 | 5 |
| 849 | 854 | 856 | 5 |
| 849 | 854 | 857 | 5 |
| 855 | 854 | 856 | 5 |
| 855 | 854 | 857 | 5 |
| 856 | 854 | 857 | 5 |
| 854 | 857 | 858 | 5 |
| 854 | 857 | 859 | 5 |
| 854 | 857 | 884 | 5 |
| 858 | 857 | 859 | 5 |
| 858 | 857 | 884 | 5 |
| 859 | 857 | 884 | 5 |
| 857 | 859 | 860 | 5 |
| 857 | 859 | 861 | 5 |
| 857 | 859 | 862 | 5 |
| 860 | 859 | 861 | 5 |
| 860 | 859 | 862 | 5 |
| 861 | 859 | 862 | 5 |
| 859 | 862 | 863 | 5 |
| 859 | 862 | 864 | 5 |
| 859 | 862 | 865 | 5 |
| 863 | 862 | 864 | 5 |
| 863 | 862 | 865 | 5 |
| 864 | 862 | 865 | 5 |
| 862 | 865 | 866 | 5 |
| 862 | 865 | 867 | 5 |
| 862 | 865 | 868 | 5 |
| 866 | 865 | 867 | 5 |
| 866 | 865 | 868 | 5 |
| 867 | 865 | 868 | 5 |
| 865 | 868 | 869 | 5 |
| 865 | 868 | 870 | 5 |
| 865 | 868 | 871 | 5 |
| 869 | 868 | 870 | 5 |
| 869 | 868 | 871 | 5 |
| 870 | 868 | 871 | 5 |
| 868 | 871 | 872 | 5 |
| 868 | 871 | 873 | 5 |
| 868 | 871 | 874 | 5 |
| 872 | 871 | 873 | 5 |



|     |     |     |   |
|-----|-----|-----|---|
| 872 | 871 | 874 | 5 |
| 873 | 871 | 874 | 5 |
| 871 | 874 | 875 | 5 |
| 871 | 874 | 876 | 5 |
| 871 | 874 | 877 | 5 |
| 875 | 874 | 876 | 5 |
| 875 | 874 | 877 | 5 |
| 876 | 874 | 877 | 5 |
| 874 | 877 | 878 | 5 |
| 874 | 877 | 879 | 5 |
| 874 | 877 | 880 | 5 |
| 878 | 877 | 879 | 5 |
| 878 | 877 | 880 | 5 |
| 879 | 877 | 880 | 5 |
| 877 | 880 | 881 | 5 |
| 877 | 880 | 882 | 5 |
| 877 | 880 | 883 | 5 |
| 881 | 880 | 882 | 5 |
| 881 | 880 | 883 | 5 |
| 882 | 880 | 883 | 5 |
| 857 | 884 | 885 | 5 |
| 857 | 884 | 886 | 5 |
| 857 | 884 | 912 | 5 |
| 885 | 884 | 886 | 5 |
| 885 | 884 | 912 | 5 |
| 886 | 884 | 912 | 5 |
| 884 | 886 | 887 | 5 |
| 884 | 886 | 888 | 5 |
| 887 | 886 | 888 | 5 |
| 886 | 888 | 889 | 5 |
| 886 | 888 | 890 | 5 |
| 889 | 888 | 890 | 5 |
| 888 | 890 | 891 | 5 |
| 888 | 890 | 892 | 5 |
| 888 | 890 | 893 | 5 |
| 891 | 890 | 892 | 5 |
| 891 | 890 | 893 | 5 |
| 892 | 890 | 893 | 5 |
| 890 | 893 | 894 | 5 |
| 890 | 893 | 895 | 5 |
| 890 | 893 | 896 | 5 |
| 894 | 893 | 895 | 5 |
| 894 | 893 | 896 | 5 |
| 895 | 893 | 896 | 5 |
| 893 | 896 | 897 | 5 |
| 893 | 896 | 898 | 5 |
| 893 | 896 | 899 | 5 |
| 897 | 896 | 898 | 5 |
| 897 | 896 | 899 | 5 |
| 898 | 896 | 899 | 5 |
| 896 | 899 | 900 | 5 |
| 896 | 899 | 904 | 5 |
| 896 | 899 | 908 | 5 |
| 900 | 899 | 904 | 5 |

|     |     |     |   |
|-----|-----|-----|---|
| 900 | 899 | 908 | 5 |
| 904 | 899 | 908 | 5 |
| 899 | 900 | 901 | 5 |
| 899 | 900 | 902 | 5 |
| 899 | 900 | 903 | 5 |
| 901 | 900 | 902 | 5 |
| 901 | 900 | 903 | 5 |
| 902 | 900 | 903 | 5 |
| 899 | 904 | 905 | 5 |
| 899 | 904 | 906 | 5 |
| 899 | 904 | 907 | 5 |
| 905 | 904 | 906 | 5 |
| 905 | 904 | 907 | 5 |
| 906 | 904 | 907 | 5 |
| 899 | 908 | 909 | 5 |
| 899 | 908 | 910 | 5 |
| 899 | 908 | 911 | 5 |
| 909 | 908 | 910 | 5 |
| 909 | 908 | 911 | 5 |
| 910 | 908 | 911 | 5 |
| 884 | 912 | 913 | 5 |
| 884 | 912 | 914 | 5 |
| 884 | 912 | 917 | 5 |
| 913 | 912 | 914 | 5 |
| 913 | 912 | 917 | 5 |
| 914 | 912 | 917 | 5 |
| 912 | 914 | 915 | 5 |
| 912 | 914 | 916 | 5 |
| 915 | 914 | 916 | 5 |
| 912 | 917 | 918 | 5 |
| 912 | 917 | 919 | 5 |
| 912 | 917 | 920 | 5 |
| 918 | 917 | 919 | 5 |
| 918 | 917 | 920 | 5 |
| 919 | 917 | 920 | 5 |
| 917 | 920 | 921 | 5 |
| 917 | 920 | 922 | 5 |
| 917 | 920 | 947 | 5 |
| 921 | 920 | 922 | 5 |
| 921 | 920 | 947 | 5 |
| 922 | 920 | 947 | 5 |
| 920 | 922 | 923 | 5 |
| 920 | 922 | 924 | 5 |
| 920 | 922 | 925 | 5 |
| 923 | 922 | 924 | 5 |
| 923 | 922 | 925 | 5 |
| 924 | 922 | 925 | 5 |
| 922 | 925 | 926 | 5 |
| 922 | 925 | 927 | 5 |
| 922 | 925 | 928 | 5 |
| 926 | 925 | 927 | 5 |
| 926 | 925 | 928 | 5 |
| 927 | 925 | 928 | 5 |
| 925 | 928 | 929 | 5 |

|     |     |     |   |
|-----|-----|-----|---|
| 925 | 928 | 930 | 5 |
| 925 | 928 | 931 | 5 |
| 929 | 928 | 930 | 5 |
| 929 | 928 | 931 | 5 |
| 930 | 928 | 931 | 5 |
| 928 | 931 | 932 | 5 |
| 928 | 931 | 933 | 5 |
| 928 | 931 | 934 | 5 |
| 932 | 931 | 933 | 5 |
| 932 | 931 | 934 | 5 |
| 933 | 931 | 934 | 5 |
| 931 | 934 | 935 | 5 |
| 931 | 934 | 936 | 5 |
| 931 | 934 | 937 | 5 |
| 935 | 934 | 936 | 5 |
| 935 | 934 | 937 | 5 |
| 936 | 934 | 937 | 5 |
| 934 | 937 | 938 | 5 |
| 934 | 937 | 939 | 5 |
| 934 | 937 | 940 | 5 |
| 938 | 937 | 939 | 5 |
| 938 | 937 | 940 | 5 |
| 939 | 937 | 940 | 5 |
| 937 | 940 | 941 | 5 |
| 937 | 940 | 942 | 5 |
| 937 | 940 | 943 | 5 |
| 941 | 940 | 942 | 5 |
| 941 | 940 | 943 | 5 |
| 942 | 940 | 943 | 5 |
| 940 | 943 | 944 | 5 |
| 940 | 943 | 945 | 5 |
| 940 | 943 | 946 | 5 |
| 944 | 943 | 945 | 5 |
| 944 | 943 | 946 | 5 |
| 945 | 943 | 946 | 5 |
| 920 | 947 | 948 | 5 |
| 920 | 947 | 949 | 5 |
| 920 | 947 | 975 | 5 |
| 948 | 947 | 949 | 5 |
| 948 | 947 | 975 | 5 |
| 949 | 947 | 975 | 5 |
| 947 | 949 | 950 | 5 |
| 947 | 949 | 951 | 5 |
| 950 | 949 | 951 | 5 |
| 949 | 951 | 952 | 5 |
| 949 | 951 | 953 | 5 |
| 952 | 951 | 953 | 5 |
| 951 | 953 | 954 | 5 |
| 951 | 953 | 955 | 5 |
| 951 | 953 | 956 | 5 |
| 954 | 953 | 955 | 5 |
| 954 | 953 | 956 | 5 |
| 955 | 953 | 956 | 5 |
| 953 | 956 | 957 | 5 |

|     |     |      |   |
|-----|-----|------|---|
| 953 | 956 | 958  | 5 |
| 953 | 956 | 959  | 5 |
| 957 | 956 | 958  | 5 |
| 957 | 956 | 959  | 5 |
| 958 | 956 | 959  | 5 |
| 956 | 959 | 960  | 5 |
| 956 | 959 | 961  | 5 |
| 956 | 959 | 962  | 5 |
| 960 | 959 | 961  | 5 |
| 960 | 959 | 962  | 5 |
| 961 | 959 | 962  | 5 |
| 959 | 962 | 963  | 5 |
| 959 | 962 | 967  | 5 |
| 959 | 962 | 971  | 5 |
| 963 | 962 | 967  | 5 |
| 963 | 962 | 971  | 5 |
| 967 | 962 | 971  | 5 |
| 962 | 963 | 964  | 5 |
| 962 | 963 | 965  | 5 |
| 962 | 963 | 966  | 5 |
| 964 | 963 | 965  | 5 |
| 964 | 963 | 966  | 5 |
| 965 | 963 | 966  | 5 |
| 962 | 967 | 968  | 5 |
| 962 | 967 | 969  | 5 |
| 962 | 967 | 970  | 5 |
| 968 | 967 | 969  | 5 |
| 968 | 967 | 970  | 5 |
| 969 | 967 | 970  | 5 |
| 962 | 971 | 972  | 5 |
| 962 | 971 | 973  | 5 |
| 962 | 971 | 974  | 5 |
| 972 | 971 | 973  | 5 |
| 972 | 971 | 974  | 5 |
| 973 | 971 | 974  | 5 |
| 947 | 975 | 976  | 5 |
| 947 | 975 | 977  | 5 |
| 947 | 975 | 980  | 5 |
| 976 | 975 | 977  | 5 |
| 976 | 975 | 980  | 5 |
| 977 | 975 | 980  | 5 |
| 975 | 977 | 978  | 5 |
| 975 | 977 | 979  | 5 |
| 978 | 977 | 979  | 5 |
| 975 | 980 | 981  | 5 |
| 975 | 980 | 982  | 5 |
| 975 | 980 | 983  | 5 |
| 981 | 980 | 982  | 5 |
| 981 | 980 | 983  | 5 |
| 982 | 980 | 983  | 5 |
| 980 | 983 | 984  | 5 |
| 980 | 983 | 985  | 5 |
| 980 | 983 | 1010 | 5 |
| 984 | 983 | 985  | 5 |

|      |      |      |   |
|------|------|------|---|
| 984  | 983  | 1010 | 5 |
| 985  | 983  | 1010 | 5 |
| 983  | 985  | 986  | 5 |
| 983  | 985  | 987  | 5 |
| 983  | 985  | 988  | 5 |
| 986  | 985  | 987  | 5 |
| 986  | 985  | 988  | 5 |
| 987  | 985  | 988  | 5 |
| 985  | 988  | 989  | 5 |
| 985  | 988  | 990  | 5 |
| 985  | 988  | 991  | 5 |
| 989  | 988  | 990  | 5 |
| 989  | 988  | 991  | 5 |
| 990  | 988  | 991  | 5 |
| 988  | 991  | 992  | 5 |
| 988  | 991  | 993  | 5 |
| 988  | 991  | 994  | 5 |
| 992  | 991  | 993  | 5 |
| 992  | 991  | 994  | 5 |
| 993  | 991  | 994  | 5 |
| 991  | 994  | 995  | 5 |
| 991  | 994  | 996  | 5 |
| 991  | 994  | 997  | 5 |
| 995  | 994  | 996  | 5 |
| 995  | 994  | 997  | 5 |
| 996  | 994  | 997  | 5 |
| 994  | 997  | 998  | 5 |
| 994  | 997  | 999  | 5 |
| 994  | 997  | 1000 | 5 |
| 998  | 997  | 999  | 5 |
| 998  | 997  | 1000 | 5 |
| 999  | 997  | 1000 | 5 |
| 997  | 1000 | 1001 | 5 |
| 997  | 1000 | 1002 | 5 |
| 997  | 1000 | 1003 | 5 |
| 1001 | 1000 | 1002 | 5 |
| 1001 | 1000 | 1003 | 5 |
| 1002 | 1000 | 1003 | 5 |
| 1000 | 1003 | 1004 | 5 |
| 1000 | 1003 | 1005 | 5 |
| 1000 | 1003 | 1006 | 5 |
| 1004 | 1003 | 1005 | 5 |
| 1004 | 1003 | 1006 | 5 |
| 1005 | 1003 | 1006 | 5 |
| 1003 | 1006 | 1007 | 5 |
| 1003 | 1006 | 1008 | 5 |
| 1003 | 1006 | 1009 | 5 |
| 1007 | 1006 | 1008 | 5 |
| 1007 | 1006 | 1009 | 5 |
| 1008 | 1006 | 1009 | 5 |
| 983  | 1010 | 1011 | 5 |
| 983  | 1010 | 1012 | 5 |
| 983  | 1010 | 1038 | 5 |
| 1011 | 1010 | 1012 | 5 |

|      |      |      |   |
|------|------|------|---|
| 1011 | 1010 | 1038 | 5 |
| 1012 | 1010 | 1038 | 5 |
| 1010 | 1012 | 1013 | 5 |
| 1010 | 1012 | 1014 | 5 |
| 1013 | 1012 | 1014 | 5 |
| 1012 | 1014 | 1015 | 5 |
| 1012 | 1014 | 1016 | 5 |
| 1015 | 1014 | 1016 | 5 |
| 1014 | 1016 | 1017 | 5 |
| 1014 | 1016 | 1018 | 5 |
| 1014 | 1016 | 1019 | 5 |
| 1017 | 1016 | 1018 | 5 |
| 1017 | 1016 | 1019 | 5 |
| 1018 | 1016 | 1019 | 5 |
| 1016 | 1019 | 1020 | 5 |
| 1016 | 1019 | 1021 | 5 |
| 1016 | 1019 | 1022 | 5 |
| 1020 | 1019 | 1021 | 5 |
| 1020 | 1019 | 1022 | 5 |
| 1021 | 1019 | 1022 | 5 |
| 1019 | 1022 | 1023 | 5 |
| 1019 | 1022 | 1024 | 5 |
| 1019 | 1022 | 1025 | 5 |
| 1023 | 1022 | 1024 | 5 |
| 1023 | 1022 | 1025 | 5 |
| 1024 | 1022 | 1025 | 5 |
| 1022 | 1025 | 1026 | 5 |
| 1022 | 1025 | 1030 | 5 |
| 1022 | 1025 | 1034 | 5 |
| 1026 | 1025 | 1030 | 5 |
| 1026 | 1025 | 1034 | 5 |
| 1030 | 1025 | 1034 | 5 |
| 1025 | 1026 | 1027 | 5 |
| 1025 | 1026 | 1028 | 5 |
| 1025 | 1026 | 1029 | 5 |
| 1027 | 1026 | 1028 | 5 |
| 1027 | 1026 | 1029 | 5 |
| 1028 | 1026 | 1029 | 5 |
| 1025 | 1030 | 1031 | 5 |
| 1025 | 1030 | 1032 | 5 |
| 1025 | 1030 | 1033 | 5 |
| 1031 | 1030 | 1032 | 5 |
| 1031 | 1030 | 1033 | 5 |
| 1032 | 1030 | 1033 | 5 |
| 1025 | 1034 | 1035 | 5 |
| 1025 | 1034 | 1036 | 5 |
| 1025 | 1034 | 1037 | 5 |
| 1035 | 1034 | 1036 | 5 |
| 1035 | 1034 | 1037 | 5 |
| 1036 | 1034 | 1037 | 5 |
| 1010 | 1038 | 1039 | 5 |
| 1010 | 1038 | 1040 | 5 |
| 1010 | 1038 | 1043 | 5 |
| 1039 | 1038 | 1040 | 5 |

|      |      |      |   |
|------|------|------|---|
| 1039 | 1038 | 1043 | 5 |
| 1040 | 1038 | 1043 | 5 |
| 1038 | 1040 | 1041 | 5 |
| 1038 | 1040 | 1042 | 5 |
| 1041 | 1040 | 1042 | 5 |
| 1038 | 1043 | 1044 | 5 |
| 1038 | 1043 | 1045 | 5 |
| 1038 | 1043 | 1046 | 5 |
| 1044 | 1043 | 1045 | 5 |
| 1044 | 1043 | 1046 | 5 |
| 1045 | 1043 | 1046 | 5 |
| 1043 | 1046 | 1047 | 5 |
| 1043 | 1046 | 1048 | 5 |
| 1043 | 1046 | 1073 | 5 |
| 1047 | 1046 | 1048 | 5 |
| 1047 | 1046 | 1073 | 5 |
| 1048 | 1046 | 1073 | 5 |
| 1046 | 1048 | 1049 | 5 |
| 1046 | 1048 | 1050 | 5 |
| 1046 | 1048 | 1051 | 5 |
| 1049 | 1048 | 1050 | 5 |
| 1049 | 1048 | 1051 | 5 |
| 1050 | 1048 | 1051 | 5 |
| 1048 | 1051 | 1052 | 5 |
| 1048 | 1051 | 1053 | 5 |
| 1048 | 1051 | 1054 | 5 |
| 1052 | 1051 | 1053 | 5 |
| 1052 | 1051 | 1054 | 5 |
| 1053 | 1051 | 1054 | 5 |
| 1051 | 1054 | 1055 | 5 |
| 1051 | 1054 | 1056 | 5 |
| 1051 | 1054 | 1057 | 5 |
| 1055 | 1054 | 1056 | 5 |
| 1055 | 1054 | 1057 | 5 |
| 1056 | 1054 | 1057 | 5 |
| 1054 | 1057 | 1058 | 5 |
| 1054 | 1057 | 1059 | 5 |
| 1054 | 1057 | 1060 | 5 |
| 1058 | 1057 | 1059 | 5 |
| 1058 | 1057 | 1060 | 5 |
| 1059 | 1057 | 1060 | 5 |
| 1057 | 1060 | 1061 | 5 |
| 1057 | 1060 | 1062 | 5 |
| 1057 | 1060 | 1063 | 5 |
| 1061 | 1060 | 1062 | 5 |
| 1061 | 1060 | 1063 | 5 |
| 1062 | 1060 | 1063 | 5 |
| 1060 | 1063 | 1064 | 5 |
| 1060 | 1063 | 1065 | 5 |
| 1060 | 1063 | 1066 | 5 |
| 1064 | 1063 | 1065 | 5 |
| 1064 | 1063 | 1066 | 5 |
| 1065 | 1063 | 1066 | 5 |
| 1063 | 1066 | 1067 | 5 |

|      |      |      |   |
|------|------|------|---|
| 1063 | 1066 | 1068 | 5 |
| 1063 | 1066 | 1069 | 5 |
| 1067 | 1066 | 1068 | 5 |
| 1067 | 1066 | 1069 | 5 |
| 1068 | 1066 | 1069 | 5 |
| 1066 | 1069 | 1070 | 5 |
| 1066 | 1069 | 1071 | 5 |
| 1066 | 1069 | 1072 | 5 |
| 1070 | 1069 | 1071 | 5 |
| 1070 | 1069 | 1072 | 5 |
| 1071 | 1069 | 1072 | 5 |
| 1046 | 1073 | 1074 | 5 |
| 1046 | 1073 | 1075 | 5 |
| 1046 | 1073 | 1101 | 5 |
| 1074 | 1073 | 1075 | 5 |
| 1074 | 1073 | 1101 | 5 |
| 1075 | 1073 | 1101 | 5 |
| 1073 | 1075 | 1076 | 5 |
| 1073 | 1075 | 1077 | 5 |
| 1076 | 1075 | 1077 | 5 |
| 1075 | 1077 | 1078 | 5 |
| 1075 | 1077 | 1079 | 5 |
| 1078 | 1077 | 1079 | 5 |
| 1077 | 1079 | 1080 | 5 |
| 1077 | 1079 | 1081 | 5 |
| 1077 | 1079 | 1082 | 5 |
| 1080 | 1079 | 1081 | 5 |
| 1080 | 1079 | 1082 | 5 |
| 1081 | 1079 | 1082 | 5 |
| 1079 | 1082 | 1083 | 5 |
| 1079 | 1082 | 1084 | 5 |
| 1079 | 1082 | 1085 | 5 |
| 1083 | 1082 | 1084 | 5 |
| 1083 | 1082 | 1085 | 5 |
| 1084 | 1082 | 1085 | 5 |
| 1082 | 1085 | 1086 | 5 |
| 1082 | 1085 | 1087 | 5 |
| 1082 | 1085 | 1088 | 5 |
| 1086 | 1085 | 1087 | 5 |
| 1086 | 1085 | 1088 | 5 |
| 1087 | 1085 | 1088 | 5 |
| 1085 | 1088 | 1089 | 5 |
| 1085 | 1088 | 1093 | 5 |
| 1085 | 1088 | 1097 | 5 |
| 1089 | 1088 | 1093 | 5 |
| 1089 | 1088 | 1097 | 5 |
| 1093 | 1088 | 1097 | 5 |
| 1088 | 1089 | 1090 | 5 |
| 1088 | 1089 | 1091 | 5 |
| 1088 | 1089 | 1092 | 5 |
| 1090 | 1089 | 1091 | 5 |
| 1090 | 1089 | 1092 | 5 |
| 1091 | 1089 | 1092 | 5 |
| 1088 | 1093 | 1094 | 5 |



|      |      |      |   |
|------|------|------|---|
| 1088 | 1093 | 1095 | 5 |
| 1088 | 1093 | 1096 | 5 |
| 1094 | 1093 | 1095 | 5 |
| 1094 | 1093 | 1096 | 5 |
| 1095 | 1093 | 1096 | 5 |
| 1088 | 1097 | 1098 | 5 |
| 1088 | 1097 | 1099 | 5 |
| 1088 | 1097 | 1100 | 5 |
| 1098 | 1097 | 1099 | 5 |
| 1098 | 1097 | 1100 | 5 |
| 1099 | 1097 | 1100 | 5 |
| 1073 | 1101 | 1102 | 5 |
| 1073 | 1101 | 1103 | 5 |
| 1073 | 1101 | 1106 | 5 |
| 1102 | 1101 | 1103 | 5 |
| 1102 | 1101 | 1106 | 5 |
| 1103 | 1101 | 1106 | 5 |
| 1101 | 1103 | 1104 | 5 |
| 1101 | 1103 | 1105 | 5 |
| 1104 | 1103 | 1105 | 5 |
| 1101 | 1106 | 1107 | 5 |
| 1101 | 1106 | 1108 | 5 |
| 1101 | 1106 | 1109 | 5 |
| 1107 | 1106 | 1108 | 5 |
| 1107 | 1106 | 1109 | 5 |
| 1108 | 1106 | 1109 | 5 |
| 1106 | 1109 | 1110 | 5 |
| 1106 | 1109 | 1111 | 5 |
| 1106 | 1109 | 1136 | 5 |
| 1110 | 1109 | 1111 | 5 |
| 1110 | 1109 | 1136 | 5 |
| 1111 | 1109 | 1136 | 5 |
| 1109 | 1111 | 1112 | 5 |
| 1109 | 1111 | 1113 | 5 |
| 1109 | 1111 | 1114 | 5 |
| 1112 | 1111 | 1113 | 5 |
| 1112 | 1111 | 1114 | 5 |
| 1113 | 1111 | 1114 | 5 |
| 1111 | 1114 | 1115 | 5 |
| 1111 | 1114 | 1116 | 5 |
| 1111 | 1114 | 1117 | 5 |
| 1115 | 1114 | 1116 | 5 |
| 1115 | 1114 | 1117 | 5 |
| 1116 | 1114 | 1117 | 5 |
| 1114 | 1117 | 1118 | 5 |
| 1114 | 1117 | 1119 | 5 |
| 1114 | 1117 | 1120 | 5 |
| 1118 | 1117 | 1119 | 5 |
| 1118 | 1117 | 1120 | 5 |
| 1119 | 1117 | 1120 | 5 |
| 1117 | 1120 | 1121 | 5 |
| 1117 | 1120 | 1122 | 5 |
| 1117 | 1120 | 1123 | 5 |
| 1121 | 1120 | 1122 | 5 |

|      |      |      |   |
|------|------|------|---|
| 1121 | 1120 | 1123 | 5 |
| 1122 | 1120 | 1123 | 5 |
| 1120 | 1123 | 1124 | 5 |
| 1120 | 1123 | 1125 | 5 |
| 1120 | 1123 | 1126 | 5 |
| 1124 | 1123 | 1125 | 5 |
| 1124 | 1123 | 1126 | 5 |
| 1125 | 1123 | 1126 | 5 |
| 1123 | 1126 | 1127 | 5 |
| 1123 | 1126 | 1128 | 5 |
| 1123 | 1126 | 1129 | 5 |
| 1127 | 1126 | 1128 | 5 |
| 1127 | 1126 | 1129 | 5 |
| 1128 | 1126 | 1129 | 5 |
| 1126 | 1129 | 1130 | 5 |
| 1126 | 1129 | 1131 | 5 |
| 1126 | 1129 | 1132 | 5 |
| 1130 | 1129 | 1131 | 5 |
| 1130 | 1129 | 1132 | 5 |
| 1131 | 1129 | 1132 | 5 |
| 1129 | 1132 | 1133 | 5 |
| 1129 | 1132 | 1134 | 5 |
| 1129 | 1132 | 1135 | 5 |
| 1133 | 1132 | 1134 | 5 |
| 1133 | 1132 | 1135 | 5 |
| 1134 | 1132 | 1135 | 5 |
| 1109 | 1136 | 1137 | 5 |
| 1109 | 1136 | 1138 | 5 |
| 1109 | 1136 | 1164 | 5 |
| 1137 | 1136 | 1138 | 5 |
| 1137 | 1136 | 1164 | 5 |
| 1138 | 1136 | 1164 | 5 |
| 1136 | 1138 | 1139 | 5 |
| 1136 | 1138 | 1140 | 5 |
| 1139 | 1138 | 1140 | 5 |
| 1138 | 1140 | 1141 | 5 |
| 1138 | 1140 | 1142 | 5 |
| 1141 | 1140 | 1142 | 5 |
| 1140 | 1142 | 1143 | 5 |
| 1140 | 1142 | 1144 | 5 |
| 1140 | 1142 | 1145 | 5 |
| 1143 | 1142 | 1144 | 5 |
| 1143 | 1142 | 1145 | 5 |
| 1144 | 1142 | 1145 | 5 |
| 1142 | 1145 | 1146 | 5 |
| 1142 | 1145 | 1147 | 5 |
| 1142 | 1145 | 1148 | 5 |
| 1146 | 1145 | 1147 | 5 |
| 1146 | 1145 | 1148 | 5 |
| 1147 | 1145 | 1148 | 5 |
| 1145 | 1148 | 1149 | 5 |
| 1145 | 1148 | 1150 | 5 |
| 1145 | 1148 | 1151 | 5 |
| 1149 | 1148 | 1150 | 5 |

|      |      |      |   |
|------|------|------|---|
| 1149 | 1148 | 1151 | 5 |
| 1150 | 1148 | 1151 | 5 |
| 1148 | 1151 | 1152 | 5 |
| 1148 | 1151 | 1156 | 5 |
| 1148 | 1151 | 1160 | 5 |
| 1152 | 1151 | 1156 | 5 |
| 1152 | 1151 | 1160 | 5 |
| 1156 | 1151 | 1160 | 5 |
| 1151 | 1152 | 1153 | 5 |
| 1151 | 1152 | 1154 | 5 |
| 1151 | 1152 | 1155 | 5 |
| 1153 | 1152 | 1154 | 5 |
| 1153 | 1152 | 1155 | 5 |
| 1154 | 1152 | 1155 | 5 |
| 1151 | 1156 | 1157 | 5 |
| 1151 | 1156 | 1158 | 5 |
| 1151 | 1156 | 1159 | 5 |
| 1157 | 1156 | 1158 | 5 |
| 1157 | 1156 | 1159 | 5 |
| 1158 | 1156 | 1159 | 5 |
| 1151 | 1160 | 1161 | 5 |
| 1151 | 1160 | 1162 | 5 |
| 1151 | 1160 | 1163 | 5 |
| 1161 | 1160 | 1162 | 5 |
| 1161 | 1160 | 1163 | 5 |
| 1162 | 1160 | 1163 | 5 |
| 1136 | 1164 | 1165 | 5 |
| 1136 | 1164 | 1166 | 5 |
| 1136 | 1164 | 1169 | 5 |
| 1165 | 1164 | 1166 | 5 |
| 1165 | 1164 | 1169 | 5 |
| 1166 | 1164 | 1169 | 5 |
| 1164 | 1166 | 1167 | 5 |
| 1164 | 1166 | 1168 | 5 |
| 1167 | 1166 | 1168 | 5 |
| 1164 | 1169 | 1170 | 5 |
| 1164 | 1169 | 1171 | 5 |
| 1164 | 1169 | 1172 | 5 |
| 1170 | 1169 | 1171 | 5 |
| 1170 | 1169 | 1172 | 5 |
| 1171 | 1169 | 1172 | 5 |
| 1169 | 1172 | 1173 | 5 |
| 1169 | 1172 | 1174 | 5 |
| 1169 | 1172 | 1199 | 5 |
| 1173 | 1172 | 1174 | 5 |
| 1173 | 1172 | 1199 | 5 |
| 1174 | 1172 | 1199 | 5 |
| 1172 | 1174 | 1175 | 5 |
| 1172 | 1174 | 1176 | 5 |
| 1172 | 1174 | 1177 | 5 |
| 1175 | 1174 | 1176 | 5 |
| 1175 | 1174 | 1177 | 5 |
| 1176 | 1174 | 1177 | 5 |
| 1174 | 1177 | 1178 | 5 |

|      |      |      |   |
|------|------|------|---|
| 1174 | 1177 | 1179 | 5 |
| 1174 | 1177 | 1180 | 5 |
| 1178 | 1177 | 1179 | 5 |
| 1178 | 1177 | 1180 | 5 |
| 1179 | 1177 | 1180 | 5 |
| 1177 | 1180 | 1181 | 5 |
| 1177 | 1180 | 1182 | 5 |
| 1177 | 1180 | 1183 | 5 |
| 1181 | 1180 | 1182 | 5 |
| 1181 | 1180 | 1183 | 5 |
| 1182 | 1180 | 1183 | 5 |
| 1180 | 1183 | 1184 | 5 |
| 1180 | 1183 | 1185 | 5 |
| 1180 | 1183 | 1186 | 5 |
| 1184 | 1183 | 1185 | 5 |
| 1184 | 1183 | 1186 | 5 |
| 1185 | 1183 | 1186 | 5 |
| 1183 | 1186 | 1187 | 5 |
| 1183 | 1186 | 1188 | 5 |
| 1183 | 1186 | 1189 | 5 |
| 1187 | 1186 | 1188 | 5 |
| 1187 | 1186 | 1189 | 5 |
| 1188 | 1186 | 1189 | 5 |
| 1186 | 1189 | 1190 | 5 |
| 1186 | 1189 | 1191 | 5 |
| 1186 | 1189 | 1192 | 5 |
| 1190 | 1189 | 1191 | 5 |
| 1190 | 1189 | 1192 | 5 |
| 1191 | 1189 | 1192 | 5 |
| 1189 | 1192 | 1193 | 5 |
| 1189 | 1192 | 1194 | 5 |
| 1189 | 1192 | 1195 | 5 |
| 1193 | 1192 | 1194 | 5 |
| 1193 | 1192 | 1195 | 5 |
| 1194 | 1192 | 1195 | 5 |
| 1192 | 1195 | 1196 | 5 |
| 1192 | 1195 | 1197 | 5 |
| 1192 | 1195 | 1198 | 5 |
| 1196 | 1195 | 1197 | 5 |
| 1196 | 1195 | 1198 | 5 |
| 1197 | 1195 | 1198 | 5 |
| 1172 | 1199 | 1200 | 5 |
| 1172 | 1199 | 1201 | 5 |
| 1172 | 1199 | 1227 | 5 |
| 1200 | 1199 | 1201 | 5 |
| 1200 | 1199 | 1227 | 5 |
| 1201 | 1199 | 1227 | 5 |
| 1199 | 1201 | 1202 | 5 |
| 1199 | 1201 | 1203 | 5 |
| 1202 | 1201 | 1203 | 5 |
| 1201 | 1203 | 1204 | 5 |
| 1201 | 1203 | 1205 | 5 |
| 1204 | 1203 | 1205 | 5 |
| 1203 | 1205 | 1206 | 5 |

|      |      |      |   |
|------|------|------|---|
| 1203 | 1205 | 1207 | 5 |
| 1203 | 1205 | 1208 | 5 |
| 1206 | 1205 | 1207 | 5 |
| 1206 | 1205 | 1208 | 5 |
| 1207 | 1205 | 1208 | 5 |
| 1205 | 1208 | 1209 | 5 |
| 1205 | 1208 | 1210 | 5 |
| 1205 | 1208 | 1211 | 5 |
| 1209 | 1208 | 1210 | 5 |
| 1209 | 1208 | 1211 | 5 |
| 1210 | 1208 | 1211 | 5 |
| 1208 | 1211 | 1212 | 5 |
| 1208 | 1211 | 1213 | 5 |
| 1208 | 1211 | 1214 | 5 |
| 1212 | 1211 | 1213 | 5 |
| 1212 | 1211 | 1214 | 5 |
| 1213 | 1211 | 1214 | 5 |
| 1211 | 1214 | 1215 | 5 |
| 1211 | 1214 | 1219 | 5 |
| 1211 | 1214 | 1223 | 5 |
| 1215 | 1214 | 1219 | 5 |
| 1215 | 1214 | 1223 | 5 |
| 1219 | 1214 | 1223 | 5 |
| 1214 | 1215 | 1216 | 5 |
| 1214 | 1215 | 1217 | 5 |
| 1214 | 1215 | 1218 | 5 |
| 1216 | 1215 | 1217 | 5 |
| 1216 | 1215 | 1218 | 5 |
| 1217 | 1215 | 1218 | 5 |
| 1214 | 1219 | 1220 | 5 |
| 1214 | 1219 | 1221 | 5 |
| 1214 | 1219 | 1222 | 5 |
| 1220 | 1219 | 1221 | 5 |
| 1220 | 1219 | 1222 | 5 |
| 1221 | 1219 | 1222 | 5 |
| 1214 | 1223 | 1224 | 5 |
| 1214 | 1223 | 1225 | 5 |
| 1214 | 1223 | 1226 | 5 |
| 1224 | 1223 | 1225 | 5 |
| 1224 | 1223 | 1226 | 5 |
| 1225 | 1223 | 1226 | 5 |
| 1199 | 1227 | 1228 | 5 |
| 1199 | 1227 | 1229 | 5 |
| 1199 | 1227 | 1232 | 5 |
| 1228 | 1227 | 1229 | 5 |
| 1228 | 1227 | 1232 | 5 |
| 1229 | 1227 | 1232 | 5 |
| 1227 | 1229 | 1230 | 5 |
| 1227 | 1229 | 1231 | 5 |
| 1230 | 1229 | 1231 | 5 |
| 1227 | 1232 | 1233 | 5 |
| 1227 | 1232 | 1234 | 5 |
| 1227 | 1232 | 1235 | 5 |
| 1233 | 1232 | 1234 | 5 |

|      |      |      |   |
|------|------|------|---|
| 1233 | 1232 | 1235 | 5 |
| 1234 | 1232 | 1235 | 5 |
| 1232 | 1235 | 1236 | 5 |
| 1232 | 1235 | 1237 | 5 |
| 1232 | 1235 | 1262 | 5 |
| 1236 | 1235 | 1237 | 5 |
| 1236 | 1235 | 1262 | 5 |
| 1237 | 1235 | 1262 | 5 |
| 1235 | 1237 | 1238 | 5 |
| 1235 | 1237 | 1239 | 5 |
| 1235 | 1237 | 1240 | 5 |
| 1238 | 1237 | 1239 | 5 |
| 1238 | 1237 | 1240 | 5 |
| 1239 | 1237 | 1240 | 5 |
| 1237 | 1240 | 1241 | 5 |
| 1237 | 1240 | 1242 | 5 |
| 1237 | 1240 | 1243 | 5 |
| 1241 | 1240 | 1242 | 5 |
| 1241 | 1240 | 1243 | 5 |
| 1242 | 1240 | 1243 | 5 |
| 1240 | 1243 | 1244 | 5 |
| 1240 | 1243 | 1245 | 5 |
| 1240 | 1243 | 1246 | 5 |
| 1244 | 1243 | 1245 | 5 |
| 1244 | 1243 | 1246 | 5 |
| 1245 | 1243 | 1246 | 5 |
| 1243 | 1246 | 1247 | 5 |
| 1243 | 1246 | 1248 | 5 |
| 1243 | 1246 | 1249 | 5 |
| 1247 | 1246 | 1248 | 5 |
| 1247 | 1246 | 1249 | 5 |
| 1248 | 1246 | 1249 | 5 |
| 1246 | 1249 | 1250 | 5 |
| 1246 | 1249 | 1251 | 5 |
| 1246 | 1249 | 1252 | 5 |
| 1250 | 1249 | 1251 | 5 |
| 1250 | 1249 | 1252 | 5 |
| 1251 | 1249 | 1252 | 5 |
| 1249 | 1252 | 1253 | 5 |
| 1249 | 1252 | 1254 | 5 |
| 1249 | 1252 | 1255 | 5 |
| 1253 | 1252 | 1254 | 5 |
| 1253 | 1252 | 1255 | 5 |
| 1254 | 1252 | 1255 | 5 |
| 1252 | 1255 | 1256 | 5 |
| 1252 | 1255 | 1257 | 5 |
| 1252 | 1255 | 1258 | 5 |
| 1256 | 1255 | 1257 | 5 |
| 1256 | 1255 | 1258 | 5 |
| 1257 | 1255 | 1258 | 5 |
| 1255 | 1258 | 1259 | 5 |
| 1255 | 1258 | 1260 | 5 |
| 1255 | 1258 | 1261 | 5 |
| 1259 | 1258 | 1260 | 5 |

|      |      |      |   |
|------|------|------|---|
| 1259 | 1258 | 1261 | 5 |
| 1260 | 1258 | 1261 | 5 |
| 1235 | 1262 | 1263 | 5 |
| 1235 | 1262 | 1264 | 5 |
| 1235 | 1262 | 1290 | 5 |
| 1263 | 1262 | 1264 | 5 |
| 1263 | 1262 | 1290 | 5 |
| 1264 | 1262 | 1290 | 5 |
| 1262 | 1264 | 1265 | 5 |
| 1262 | 1264 | 1266 | 5 |
| 1265 | 1264 | 1266 | 5 |
| 1264 | 1266 | 1267 | 5 |
| 1264 | 1266 | 1268 | 5 |
| 1267 | 1266 | 1268 | 5 |
| 1266 | 1268 | 1269 | 5 |
| 1266 | 1268 | 1270 | 5 |
| 1266 | 1268 | 1271 | 5 |
| 1269 | 1268 | 1270 | 5 |
| 1269 | 1268 | 1271 | 5 |
| 1270 | 1268 | 1271 | 5 |
| 1268 | 1271 | 1272 | 5 |
| 1268 | 1271 | 1273 | 5 |
| 1268 | 1271 | 1274 | 5 |
| 1272 | 1271 | 1273 | 5 |
| 1272 | 1271 | 1274 | 5 |
| 1273 | 1271 | 1274 | 5 |
| 1271 | 1274 | 1275 | 5 |
| 1271 | 1274 | 1276 | 5 |
| 1271 | 1274 | 1277 | 5 |
| 1275 | 1274 | 1276 | 5 |
| 1275 | 1274 | 1277 | 5 |
| 1276 | 1274 | 1277 | 5 |
| 1274 | 1277 | 1278 | 5 |
| 1274 | 1277 | 1282 | 5 |
| 1274 | 1277 | 1286 | 5 |
| 1278 | 1277 | 1282 | 5 |
| 1278 | 1277 | 1286 | 5 |
| 1282 | 1277 | 1286 | 5 |
| 1277 | 1278 | 1279 | 5 |
| 1277 | 1278 | 1280 | 5 |
| 1277 | 1278 | 1281 | 5 |
| 1279 | 1278 | 1280 | 5 |
| 1279 | 1278 | 1281 | 5 |
| 1280 | 1278 | 1281 | 5 |
| 1277 | 1282 | 1283 | 5 |
| 1277 | 1282 | 1284 | 5 |
| 1277 | 1282 | 1285 | 5 |
| 1283 | 1282 | 1284 | 5 |
| 1283 | 1282 | 1285 | 5 |
| 1284 | 1282 | 1285 | 5 |
| 1277 | 1286 | 1287 | 5 |
| 1277 | 1286 | 1288 | 5 |
| 1277 | 1286 | 1289 | 5 |
| 1287 | 1286 | 1288 | 5 |

|      |      |      |   |
|------|------|------|---|
| 1287 | 1286 | 1289 | 5 |
| 1288 | 1286 | 1289 | 5 |
| 1262 | 1290 | 1291 | 5 |
| 1262 | 1290 | 1292 | 5 |
| 1262 | 1290 | 1295 | 5 |
| 1291 | 1290 | 1292 | 5 |
| 1291 | 1290 | 1295 | 5 |
| 1292 | 1290 | 1295 | 5 |
| 1290 | 1292 | 1293 | 5 |
| 1290 | 1292 | 1294 | 5 |
| 1293 | 1292 | 1294 | 5 |
| 1290 | 1295 | 1296 | 5 |
| 1290 | 1295 | 1297 | 5 |
| 1290 | 1295 | 1298 | 5 |
| 1296 | 1295 | 1297 | 5 |
| 1296 | 1295 | 1298 | 5 |
| 1297 | 1295 | 1298 | 5 |
| 1295 | 1298 | 1299 | 5 |
| 1295 | 1298 | 1300 | 5 |
| 1295 | 1298 | 1325 | 5 |
| 1299 | 1298 | 1300 | 5 |
| 1299 | 1298 | 1325 | 5 |
| 1300 | 1298 | 1325 | 5 |
| 1298 | 1300 | 1301 | 5 |
| 1298 | 1300 | 1302 | 5 |
| 1298 | 1300 | 1303 | 5 |
| 1301 | 1300 | 1302 | 5 |
| 1301 | 1300 | 1303 | 5 |
| 1302 | 1300 | 1303 | 5 |
| 1300 | 1303 | 1304 | 5 |
| 1300 | 1303 | 1305 | 5 |
| 1300 | 1303 | 1306 | 5 |
| 1304 | 1303 | 1305 | 5 |
| 1304 | 1303 | 1306 | 5 |
| 1305 | 1303 | 1306 | 5 |
| 1303 | 1306 | 1307 | 5 |
| 1303 | 1306 | 1308 | 5 |
| 1303 | 1306 | 1309 | 5 |
| 1307 | 1306 | 1308 | 5 |
| 1307 | 1306 | 1309 | 5 |
| 1308 | 1306 | 1309 | 5 |
| 1306 | 1309 | 1310 | 5 |
| 1306 | 1309 | 1311 | 5 |
| 1306 | 1309 | 1312 | 5 |
| 1310 | 1309 | 1311 | 5 |
| 1310 | 1309 | 1312 | 5 |
| 1311 | 1309 | 1312 | 5 |
| 1309 | 1312 | 1313 | 5 |
| 1309 | 1312 | 1314 | 5 |
| 1309 | 1312 | 1315 | 5 |
| 1313 | 1312 | 1314 | 5 |
| 1313 | 1312 | 1315 | 5 |
| 1314 | 1312 | 1315 | 5 |
| 1312 | 1315 | 1316 | 5 |



|      |      |      |   |
|------|------|------|---|
| 1312 | 1315 | 1317 | 5 |
| 1312 | 1315 | 1318 | 5 |
| 1316 | 1315 | 1317 | 5 |
| 1316 | 1315 | 1318 | 5 |
| 1317 | 1315 | 1318 | 5 |
| 1315 | 1318 | 1319 | 5 |
| 1315 | 1318 | 1320 | 5 |
| 1315 | 1318 | 1321 | 5 |
| 1319 | 1318 | 1320 | 5 |
| 1319 | 1318 | 1321 | 5 |
| 1320 | 1318 | 1321 | 5 |
| 1318 | 1321 | 1322 | 5 |
| 1318 | 1321 | 1323 | 5 |
| 1318 | 1321 | 1324 | 5 |
| 1322 | 1321 | 1323 | 5 |
| 1322 | 1321 | 1324 | 5 |
| 1323 | 1321 | 1324 | 5 |
| 1298 | 1325 | 1326 | 5 |
| 1298 | 1325 | 1327 | 5 |
| 1298 | 1325 | 1353 | 5 |
| 1326 | 1325 | 1327 | 5 |
| 1326 | 1325 | 1353 | 5 |
| 1327 | 1325 | 1353 | 5 |
| 1325 | 1327 | 1328 | 5 |
| 1325 | 1327 | 1329 | 5 |
| 1328 | 1327 | 1329 | 5 |
| 1327 | 1329 | 1330 | 5 |
| 1327 | 1329 | 1331 | 5 |
| 1330 | 1329 | 1331 | 5 |
| 1329 | 1331 | 1332 | 5 |
| 1329 | 1331 | 1333 | 5 |
| 1329 | 1331 | 1334 | 5 |
| 1332 | 1331 | 1333 | 5 |
| 1332 | 1331 | 1334 | 5 |
| 1333 | 1331 | 1334 | 5 |
| 1331 | 1334 | 1335 | 5 |
| 1331 | 1334 | 1336 | 5 |
| 1331 | 1334 | 1337 | 5 |
| 1335 | 1334 | 1336 | 5 |
| 1335 | 1334 | 1337 | 5 |
| 1336 | 1334 | 1337 | 5 |
| 1334 | 1337 | 1338 | 5 |
| 1334 | 1337 | 1339 | 5 |
| 1334 | 1337 | 1340 | 5 |
| 1338 | 1337 | 1339 | 5 |
| 1338 | 1337 | 1340 | 5 |
| 1339 | 1337 | 1340 | 5 |
| 1337 | 1340 | 1341 | 5 |
| 1337 | 1340 | 1345 | 5 |
| 1337 | 1340 | 1349 | 5 |
| 1341 | 1340 | 1345 | 5 |
| 1341 | 1340 | 1349 | 5 |
| 1345 | 1340 | 1349 | 5 |
| 1340 | 1341 | 1342 | 5 |

|      |      |      |   |
|------|------|------|---|
| 1340 | 1341 | 1343 | 5 |
| 1340 | 1341 | 1344 | 5 |
| 1342 | 1341 | 1343 | 5 |
| 1342 | 1341 | 1344 | 5 |
| 1343 | 1341 | 1344 | 5 |
| 1340 | 1345 | 1346 | 5 |
| 1340 | 1345 | 1347 | 5 |
| 1340 | 1345 | 1348 | 5 |
| 1346 | 1345 | 1347 | 5 |
| 1346 | 1345 | 1348 | 5 |
| 1347 | 1345 | 1348 | 5 |
| 1340 | 1349 | 1350 | 5 |
| 1340 | 1349 | 1351 | 5 |
| 1340 | 1349 | 1352 | 5 |
| 1350 | 1349 | 1351 | 5 |
| 1350 | 1349 | 1352 | 5 |
| 1351 | 1349 | 1352 | 5 |
| 1325 | 1353 | 1354 | 5 |
| 1325 | 1353 | 1355 | 5 |
| 1325 | 1353 | 1358 | 5 |
| 1354 | 1353 | 1355 | 5 |
| 1354 | 1353 | 1358 | 5 |
| 1355 | 1353 | 1358 | 5 |
| 1353 | 1355 | 1356 | 5 |
| 1353 | 1355 | 1357 | 5 |
| 1356 | 1355 | 1357 | 5 |
| 1353 | 1358 | 1359 | 5 |
| 1353 | 1358 | 1360 | 5 |
| 1353 | 1358 | 1361 | 5 |
| 1359 | 1358 | 1360 | 5 |
| 1359 | 1358 | 1361 | 5 |
| 1360 | 1358 | 1361 | 5 |
| 1358 | 1361 | 1362 | 5 |
| 1358 | 1361 | 1363 | 5 |
| 1358 | 1361 | 1388 | 5 |
| 1362 | 1361 | 1363 | 5 |
| 1362 | 1361 | 1388 | 5 |
| 1363 | 1361 | 1388 | 5 |
| 1361 | 1363 | 1364 | 5 |
| 1361 | 1363 | 1365 | 5 |
| 1361 | 1363 | 1366 | 5 |
| 1364 | 1363 | 1365 | 5 |
| 1364 | 1363 | 1366 | 5 |
| 1365 | 1363 | 1366 | 5 |
| 1363 | 1366 | 1367 | 5 |
| 1363 | 1366 | 1368 | 5 |
| 1363 | 1366 | 1369 | 5 |
| 1367 | 1366 | 1368 | 5 |
| 1367 | 1366 | 1369 | 5 |
| 1368 | 1366 | 1369 | 5 |
| 1366 | 1369 | 1370 | 5 |
| 1366 | 1369 | 1371 | 5 |
| 1366 | 1369 | 1372 | 5 |
| 1370 | 1369 | 1371 | 5 |

|      |      |      |   |
|------|------|------|---|
| 1370 | 1369 | 1372 | 5 |
| 1371 | 1369 | 1372 | 5 |
| 1369 | 1372 | 1373 | 5 |
| 1369 | 1372 | 1374 | 5 |
| 1369 | 1372 | 1375 | 5 |
| 1373 | 1372 | 1374 | 5 |
| 1373 | 1372 | 1375 | 5 |
| 1374 | 1372 | 1375 | 5 |
| 1372 | 1375 | 1376 | 5 |
| 1372 | 1375 | 1377 | 5 |
| 1372 | 1375 | 1378 | 5 |
| 1376 | 1375 | 1377 | 5 |
| 1376 | 1375 | 1378 | 5 |
| 1377 | 1375 | 1378 | 5 |
| 1375 | 1378 | 1379 | 5 |
| 1375 | 1378 | 1380 | 5 |
| 1375 | 1378 | 1381 | 5 |
| 1379 | 1378 | 1380 | 5 |
| 1379 | 1378 | 1381 | 5 |
| 1380 | 1378 | 1381 | 5 |
| 1378 | 1381 | 1382 | 5 |
| 1378 | 1381 | 1383 | 5 |
| 1378 | 1381 | 1384 | 5 |
| 1382 | 1381 | 1383 | 5 |
| 1382 | 1381 | 1384 | 5 |
| 1383 | 1381 | 1384 | 5 |
| 1381 | 1384 | 1385 | 5 |
| 1381 | 1384 | 1386 | 5 |
| 1381 | 1384 | 1387 | 5 |
| 1385 | 1384 | 1386 | 5 |
| 1385 | 1384 | 1387 | 5 |
| 1386 | 1384 | 1387 | 5 |
| 1361 | 1388 | 1389 | 5 |
| 1361 | 1388 | 1390 | 5 |
| 1361 | 1388 | 1416 | 5 |
| 1389 | 1388 | 1390 | 5 |
| 1389 | 1388 | 1416 | 5 |
| 1390 | 1388 | 1416 | 5 |
| 1388 | 1390 | 1391 | 5 |
| 1388 | 1390 | 1392 | 5 |
| 1391 | 1390 | 1392 | 5 |
| 1390 | 1392 | 1393 | 5 |
| 1390 | 1392 | 1394 | 5 |
| 1393 | 1392 | 1394 | 5 |
| 1392 | 1394 | 1395 | 5 |
| 1392 | 1394 | 1396 | 5 |
| 1392 | 1394 | 1397 | 5 |
| 1395 | 1394 | 1396 | 5 |
| 1395 | 1394 | 1397 | 5 |
| 1396 | 1394 | 1397 | 5 |
| 1394 | 1397 | 1398 | 5 |
| 1394 | 1397 | 1399 | 5 |
| 1394 | 1397 | 1400 | 5 |
| 1398 | 1397 | 1399 | 5 |

|      |      |      |   |
|------|------|------|---|
| 1398 | 1397 | 1400 | 5 |
| 1399 | 1397 | 1400 | 5 |
| 1397 | 1400 | 1401 | 5 |
| 1397 | 1400 | 1402 | 5 |
| 1397 | 1400 | 1403 | 5 |
| 1401 | 1400 | 1402 | 5 |
| 1401 | 1400 | 1403 | 5 |
| 1402 | 1400 | 1403 | 5 |
| 1400 | 1403 | 1404 | 5 |
| 1400 | 1403 | 1408 | 5 |
| 1400 | 1403 | 1412 | 5 |
| 1404 | 1403 | 1408 | 5 |
| 1404 | 1403 | 1412 | 5 |
| 1408 | 1403 | 1412 | 5 |
| 1403 | 1404 | 1405 | 5 |
| 1403 | 1404 | 1406 | 5 |
| 1403 | 1404 | 1407 | 5 |
| 1405 | 1404 | 1406 | 5 |
| 1405 | 1404 | 1407 | 5 |
| 1406 | 1404 | 1407 | 5 |
| 1403 | 1408 | 1409 | 5 |
| 1403 | 1408 | 1410 | 5 |
| 1403 | 1408 | 1411 | 5 |
| 1409 | 1408 | 1410 | 5 |
| 1409 | 1408 | 1411 | 5 |
| 1410 | 1408 | 1411 | 5 |
| 1403 | 1412 | 1413 | 5 |
| 1403 | 1412 | 1414 | 5 |
| 1403 | 1412 | 1415 | 5 |
| 1413 | 1412 | 1414 | 5 |
| 1413 | 1412 | 1415 | 5 |
| 1414 | 1412 | 1415 | 5 |
| 1388 | 1416 | 1417 | 5 |
| 1388 | 1416 | 1418 | 5 |
| 1388 | 1416 | 1421 | 5 |
| 1417 | 1416 | 1418 | 5 |
| 1417 | 1416 | 1421 | 5 |
| 1418 | 1416 | 1421 | 5 |
| 1416 | 1418 | 1419 | 5 |
| 1416 | 1418 | 1420 | 5 |
| 1419 | 1418 | 1420 | 5 |
| 1416 | 1421 | 1422 | 5 |
| 1416 | 1421 | 1423 | 5 |
| 1416 | 1421 | 1424 | 5 |
| 1422 | 1421 | 1423 | 5 |
| 1422 | 1421 | 1424 | 5 |
| 1423 | 1421 | 1424 | 5 |
| 1421 | 1424 | 1425 | 5 |
| 1421 | 1424 | 1426 | 5 |
| 1421 | 1424 | 1451 | 5 |
| 1425 | 1424 | 1426 | 5 |
| 1425 | 1424 | 1451 | 5 |
| 1426 | 1424 | 1451 | 5 |
| 1424 | 1426 | 1427 | 5 |

|      |      |      |   |
|------|------|------|---|
| 1424 | 1426 | 1428 | 5 |
| 1424 | 1426 | 1429 | 5 |
| 1427 | 1426 | 1428 | 5 |
| 1427 | 1426 | 1429 | 5 |
| 1428 | 1426 | 1429 | 5 |
| 1426 | 1429 | 1430 | 5 |
| 1426 | 1429 | 1431 | 5 |
| 1426 | 1429 | 1432 | 5 |
| 1430 | 1429 | 1431 | 5 |
| 1430 | 1429 | 1432 | 5 |
| 1431 | 1429 | 1432 | 5 |
| 1429 | 1432 | 1433 | 5 |
| 1429 | 1432 | 1434 | 5 |
| 1429 | 1432 | 1435 | 5 |
| 1433 | 1432 | 1434 | 5 |
| 1433 | 1432 | 1435 | 5 |
| 1434 | 1432 | 1435 | 5 |
| 1432 | 1435 | 1436 | 5 |
| 1432 | 1435 | 1437 | 5 |
| 1432 | 1435 | 1438 | 5 |
| 1436 | 1435 | 1437 | 5 |
| 1436 | 1435 | 1438 | 5 |
| 1437 | 1435 | 1438 | 5 |
| 1435 | 1438 | 1439 | 5 |
| 1435 | 1438 | 1440 | 5 |
| 1435 | 1438 | 1441 | 5 |
| 1439 | 1438 | 1440 | 5 |
| 1439 | 1438 | 1441 | 5 |
| 1440 | 1438 | 1441 | 5 |
| 1438 | 1441 | 1442 | 5 |
| 1438 | 1441 | 1443 | 5 |
| 1438 | 1441 | 1444 | 5 |
| 1442 | 1441 | 1443 | 5 |
| 1442 | 1441 | 1444 | 5 |
| 1443 | 1441 | 1444 | 5 |
| 1441 | 1444 | 1445 | 5 |
| 1441 | 1444 | 1446 | 5 |
| 1441 | 1444 | 1447 | 5 |
| 1445 | 1444 | 1446 | 5 |
| 1445 | 1444 | 1447 | 5 |
| 1446 | 1444 | 1447 | 5 |
| 1444 | 1447 | 1448 | 5 |
| 1444 | 1447 | 1449 | 5 |
| 1444 | 1447 | 1450 | 5 |
| 1448 | 1447 | 1449 | 5 |
| 1448 | 1447 | 1450 | 5 |
| 1449 | 1447 | 1450 | 5 |
| 1424 | 1451 | 1452 | 5 |
| 1424 | 1451 | 1453 | 5 |
| 1424 | 1451 | 1479 | 5 |
| 1452 | 1451 | 1453 | 5 |
| 1452 | 1451 | 1479 | 5 |
| 1453 | 1451 | 1479 | 5 |
| 1451 | 1453 | 1454 | 5 |

|      |      |      |   |
|------|------|------|---|
| 1451 | 1453 | 1455 | 5 |
| 1454 | 1453 | 1455 | 5 |
| 1453 | 1455 | 1456 | 5 |
| 1453 | 1455 | 1457 | 5 |
| 1456 | 1455 | 1457 | 5 |
| 1455 | 1457 | 1458 | 5 |
| 1455 | 1457 | 1459 | 5 |
| 1455 | 1457 | 1460 | 5 |
| 1458 | 1457 | 1459 | 5 |
| 1458 | 1457 | 1460 | 5 |
| 1459 | 1457 | 1460 | 5 |
| 1457 | 1460 | 1461 | 5 |
| 1457 | 1460 | 1462 | 5 |
| 1457 | 1460 | 1463 | 5 |
| 1461 | 1460 | 1462 | 5 |
| 1461 | 1460 | 1463 | 5 |
| 1462 | 1460 | 1463 | 5 |
| 1460 | 1463 | 1464 | 5 |
| 1460 | 1463 | 1465 | 5 |
| 1460 | 1463 | 1466 | 5 |
| 1464 | 1463 | 1465 | 5 |
| 1464 | 1463 | 1466 | 5 |
| 1465 | 1463 | 1466 | 5 |
| 1463 | 1466 | 1467 | 5 |
| 1463 | 1466 | 1471 | 5 |
| 1463 | 1466 | 1475 | 5 |
| 1467 | 1466 | 1471 | 5 |
| 1467 | 1466 | 1475 | 5 |
| 1471 | 1466 | 1475 | 5 |
| 1466 | 1467 | 1468 | 5 |
| 1466 | 1467 | 1469 | 5 |
| 1466 | 1467 | 1470 | 5 |
| 1468 | 1467 | 1469 | 5 |
| 1468 | 1467 | 1470 | 5 |
| 1469 | 1467 | 1470 | 5 |
| 1466 | 1471 | 1472 | 5 |
| 1466 | 1471 | 1473 | 5 |
| 1466 | 1471 | 1474 | 5 |
| 1472 | 1471 | 1473 | 5 |
| 1472 | 1471 | 1474 | 5 |
| 1473 | 1471 | 1474 | 5 |
| 1466 | 1475 | 1476 | 5 |
| 1466 | 1475 | 1477 | 5 |
| 1466 | 1475 | 1478 | 5 |
| 1476 | 1475 | 1477 | 5 |
| 1476 | 1475 | 1478 | 5 |
| 1477 | 1475 | 1478 | 5 |
| 1451 | 1479 | 1480 | 5 |
| 1451 | 1479 | 1481 | 5 |
| 1451 | 1479 | 1484 | 5 |
| 1480 | 1479 | 1481 | 5 |
| 1480 | 1479 | 1484 | 5 |
| 1481 | 1479 | 1484 | 5 |
| 1479 | 1481 | 1482 | 5 |

|      |      |      |   |
|------|------|------|---|
| 1479 | 1481 | 1483 | 5 |
| 1482 | 1481 | 1483 | 5 |
| 1479 | 1484 | 1485 | 5 |
| 1479 | 1484 | 1486 | 5 |
| 1479 | 1484 | 1487 | 5 |
| 1485 | 1484 | 1486 | 5 |
| 1485 | 1484 | 1487 | 5 |
| 1486 | 1484 | 1487 | 5 |
| 1484 | 1487 | 1488 | 5 |
| 1484 | 1487 | 1489 | 5 |
| 1484 | 1487 | 1514 | 5 |
| 1488 | 1487 | 1489 | 5 |
| 1488 | 1487 | 1514 | 5 |
| 1489 | 1487 | 1514 | 5 |
| 1487 | 1489 | 1490 | 5 |
| 1487 | 1489 | 1491 | 5 |
| 1487 | 1489 | 1492 | 5 |
| 1490 | 1489 | 1491 | 5 |
| 1490 | 1489 | 1492 | 5 |
| 1491 | 1489 | 1492 | 5 |
| 1489 | 1492 | 1493 | 5 |
| 1489 | 1492 | 1494 | 5 |
| 1489 | 1492 | 1495 | 5 |
| 1493 | 1492 | 1494 | 5 |
| 1493 | 1492 | 1495 | 5 |
| 1494 | 1492 | 1495 | 5 |
| 1492 | 1495 | 1496 | 5 |
| 1492 | 1495 | 1497 | 5 |
| 1492 | 1495 | 1498 | 5 |
| 1496 | 1495 | 1497 | 5 |
| 1496 | 1495 | 1498 | 5 |
| 1497 | 1495 | 1498 | 5 |
| 1495 | 1498 | 1499 | 5 |
| 1495 | 1498 | 1500 | 5 |
| 1495 | 1498 | 1501 | 5 |
| 1499 | 1498 | 1500 | 5 |
| 1499 | 1498 | 1501 | 5 |
| 1500 | 1498 | 1501 | 5 |
| 1498 | 1501 | 1502 | 5 |
| 1498 | 1501 | 1503 | 5 |
| 1498 | 1501 | 1504 | 5 |
| 1502 | 1501 | 1503 | 5 |
| 1502 | 1501 | 1504 | 5 |
| 1503 | 1501 | 1504 | 5 |
| 1501 | 1504 | 1505 | 5 |
| 1501 | 1504 | 1506 | 5 |
| 1501 | 1504 | 1507 | 5 |
| 1505 | 1504 | 1506 | 5 |
| 1505 | 1504 | 1507 | 5 |
| 1506 | 1504 | 1507 | 5 |
| 1504 | 1507 | 1508 | 5 |
| 1504 | 1507 | 1509 | 5 |
| 1504 | 1507 | 1510 | 5 |
| 1508 | 1507 | 1509 | 5 |

|      |      |      |   |
|------|------|------|---|
| 1508 | 1507 | 1510 | 5 |
| 1509 | 1507 | 1510 | 5 |
| 1507 | 1510 | 1511 | 5 |
| 1507 | 1510 | 1512 | 5 |
| 1507 | 1510 | 1513 | 5 |
| 1511 | 1510 | 1512 | 5 |
| 1511 | 1510 | 1513 | 5 |
| 1512 | 1510 | 1513 | 5 |
| 1487 | 1514 | 1515 | 5 |
| 1487 | 1514 | 1516 | 5 |
| 1487 | 1514 | 1542 | 5 |
| 1515 | 1514 | 1516 | 5 |
| 1515 | 1514 | 1542 | 5 |
| 1516 | 1514 | 1542 | 5 |
| 1514 | 1516 | 1517 | 5 |
| 1514 | 1516 | 1518 | 5 |
| 1517 | 1516 | 1518 | 5 |
| 1516 | 1518 | 1519 | 5 |
| 1516 | 1518 | 1520 | 5 |
| 1519 | 1518 | 1520 | 5 |
| 1518 | 1520 | 1521 | 5 |
| 1518 | 1520 | 1522 | 5 |
| 1518 | 1520 | 1523 | 5 |
| 1521 | 1520 | 1522 | 5 |
| 1521 | 1520 | 1523 | 5 |
| 1522 | 1520 | 1523 | 5 |
| 1520 | 1523 | 1524 | 5 |
| 1520 | 1523 | 1525 | 5 |
| 1520 | 1523 | 1526 | 5 |
| 1524 | 1523 | 1525 | 5 |
| 1524 | 1523 | 1526 | 5 |
| 1525 | 1523 | 1526 | 5 |
| 1523 | 1526 | 1527 | 5 |
| 1523 | 1526 | 1528 | 5 |
| 1523 | 1526 | 1529 | 5 |
| 1527 | 1526 | 1528 | 5 |
| 1527 | 1526 | 1529 | 5 |
| 1528 | 1526 | 1529 | 5 |
| 1526 | 1529 | 1530 | 5 |
| 1526 | 1529 | 1534 | 5 |
| 1526 | 1529 | 1538 | 5 |
| 1530 | 1529 | 1534 | 5 |
| 1530 | 1529 | 1538 | 5 |
| 1534 | 1529 | 1538 | 5 |
| 1529 | 1530 | 1531 | 5 |
| 1529 | 1530 | 1532 | 5 |
| 1529 | 1530 | 1533 | 5 |
| 1531 | 1530 | 1532 | 5 |
| 1531 | 1530 | 1533 | 5 |
| 1532 | 1530 | 1533 | 5 |
| 1529 | 1534 | 1535 | 5 |
| 1529 | 1534 | 1536 | 5 |
| 1529 | 1534 | 1537 | 5 |
| 1535 | 1534 | 1536 | 5 |



|      |      |      |   |
|------|------|------|---|
| 1535 | 1534 | 1537 | 5 |
| 1536 | 1534 | 1537 | 5 |
| 1529 | 1538 | 1539 | 5 |
| 1529 | 1538 | 1540 | 5 |
| 1529 | 1538 | 1541 | 5 |
| 1539 | 1538 | 1540 | 5 |
| 1539 | 1538 | 1541 | 5 |
| 1540 | 1538 | 1541 | 5 |
| 1514 | 1542 | 1543 | 5 |
| 1514 | 1542 | 1544 | 5 |
| 1514 | 1542 | 1547 | 5 |
| 1543 | 1542 | 1544 | 5 |
| 1543 | 1542 | 1547 | 5 |
| 1544 | 1542 | 1547 | 5 |
| 1542 | 1544 | 1545 | 5 |
| 1542 | 1544 | 1546 | 5 |
| 1545 | 1544 | 1546 | 5 |
| 1542 | 1547 | 1548 | 5 |
| 1542 | 1547 | 1549 | 5 |
| 1542 | 1547 | 1550 | 5 |
| 1548 | 1547 | 1549 | 5 |
| 1548 | 1547 | 1550 | 5 |
| 1549 | 1547 | 1550 | 5 |
| 1547 | 1550 | 1551 | 5 |
| 1547 | 1550 | 1552 | 5 |
| 1547 | 1550 | 1577 | 5 |
| 1551 | 1550 | 1552 | 5 |
| 1551 | 1550 | 1577 | 5 |
| 1552 | 1550 | 1577 | 5 |
| 1550 | 1552 | 1553 | 5 |
| 1550 | 1552 | 1554 | 5 |
| 1550 | 1552 | 1555 | 5 |
| 1553 | 1552 | 1554 | 5 |
| 1553 | 1552 | 1555 | 5 |
| 1554 | 1552 | 1555 | 5 |
| 1552 | 1555 | 1556 | 5 |
| 1552 | 1555 | 1557 | 5 |
| 1552 | 1555 | 1558 | 5 |
| 1556 | 1555 | 1557 | 5 |
| 1556 | 1555 | 1558 | 5 |
| 1557 | 1555 | 1558 | 5 |
| 1555 | 1558 | 1559 | 5 |
| 1555 | 1558 | 1560 | 5 |
| 1555 | 1558 | 1561 | 5 |
| 1559 | 1558 | 1560 | 5 |
| 1559 | 1558 | 1561 | 5 |
| 1560 | 1558 | 1561 | 5 |
| 1558 | 1561 | 1562 | 5 |
| 1558 | 1561 | 1563 | 5 |
| 1558 | 1561 | 1564 | 5 |
| 1562 | 1561 | 1563 | 5 |
| 1562 | 1561 | 1564 | 5 |
| 1563 | 1561 | 1564 | 5 |
| 1561 | 1564 | 1565 | 5 |

|      |      |      |   |
|------|------|------|---|
| 1561 | 1564 | 1566 | 5 |
| 1561 | 1564 | 1567 | 5 |
| 1565 | 1564 | 1566 | 5 |
| 1565 | 1564 | 1567 | 5 |
| 1566 | 1564 | 1567 | 5 |
| 1564 | 1567 | 1568 | 5 |
| 1564 | 1567 | 1569 | 5 |
| 1564 | 1567 | 1570 | 5 |
| 1568 | 1567 | 1569 | 5 |
| 1568 | 1567 | 1570 | 5 |
| 1569 | 1567 | 1570 | 5 |
| 1567 | 1570 | 1571 | 5 |
| 1567 | 1570 | 1572 | 5 |
| 1567 | 1570 | 1573 | 5 |
| 1571 | 1570 | 1572 | 5 |
| 1571 | 1570 | 1573 | 5 |
| 1572 | 1570 | 1573 | 5 |
| 1570 | 1573 | 1574 | 5 |
| 1570 | 1573 | 1575 | 5 |
| 1570 | 1573 | 1576 | 5 |
| 1574 | 1573 | 1575 | 5 |
| 1574 | 1573 | 1576 | 5 |
| 1575 | 1573 | 1576 | 5 |
| 1550 | 1577 | 1578 | 5 |
| 1550 | 1577 | 1579 | 5 |
| 1550 | 1577 | 1605 | 5 |
| 1578 | 1577 | 1579 | 5 |
| 1578 | 1577 | 1605 | 5 |
| 1579 | 1577 | 1605 | 5 |
| 1577 | 1579 | 1580 | 5 |
| 1577 | 1579 | 1581 | 5 |
| 1580 | 1579 | 1581 | 5 |
| 1579 | 1581 | 1582 | 5 |
| 1579 | 1581 | 1583 | 5 |
| 1582 | 1581 | 1583 | 5 |
| 1581 | 1583 | 1584 | 5 |
| 1581 | 1583 | 1585 | 5 |
| 1581 | 1583 | 1586 | 5 |
| 1584 | 1583 | 1585 | 5 |
| 1584 | 1583 | 1586 | 5 |
| 1585 | 1583 | 1586 | 5 |
| 1583 | 1586 | 1587 | 5 |
| 1583 | 1586 | 1588 | 5 |
| 1583 | 1586 | 1589 | 5 |
| 1587 | 1586 | 1588 | 5 |
| 1587 | 1586 | 1589 | 5 |
| 1588 | 1586 | 1589 | 5 |
| 1586 | 1589 | 1590 | 5 |
| 1586 | 1589 | 1591 | 5 |
| 1586 | 1589 | 1592 | 5 |
| 1590 | 1589 | 1591 | 5 |
| 1590 | 1589 | 1592 | 5 |
| 1591 | 1589 | 1592 | 5 |
| 1589 | 1592 | 1593 | 5 |

|      |      |      |   |
|------|------|------|---|
| 1589 | 1592 | 1597 | 5 |
| 1589 | 1592 | 1601 | 5 |
| 1593 | 1592 | 1597 | 5 |
| 1593 | 1592 | 1601 | 5 |
| 1597 | 1592 | 1601 | 5 |
| 1592 | 1593 | 1594 | 5 |
| 1592 | 1593 | 1595 | 5 |
| 1592 | 1593 | 1596 | 5 |
| 1594 | 1593 | 1595 | 5 |
| 1594 | 1593 | 1596 | 5 |
| 1595 | 1593 | 1596 | 5 |
| 1592 | 1597 | 1598 | 5 |
| 1592 | 1597 | 1599 | 5 |
| 1592 | 1597 | 1600 | 5 |
| 1598 | 1597 | 1599 | 5 |
| 1598 | 1597 | 1600 | 5 |
| 1599 | 1597 | 1600 | 5 |
| 1592 | 1601 | 1602 | 5 |
| 1592 | 1601 | 1603 | 5 |
| 1592 | 1601 | 1604 | 5 |
| 1602 | 1601 | 1603 | 5 |
| 1602 | 1601 | 1604 | 5 |
| 1603 | 1601 | 1604 | 5 |
| 1577 | 1605 | 1606 | 5 |
| 1577 | 1605 | 1607 | 5 |
| 1577 | 1605 | 1610 | 5 |
| 1606 | 1605 | 1607 | 5 |
| 1606 | 1605 | 1610 | 5 |
| 1607 | 1605 | 1610 | 5 |
| 1605 | 1607 | 1608 | 5 |
| 1605 | 1607 | 1609 | 5 |
| 1608 | 1607 | 1609 | 5 |
| 1605 | 1610 | 1611 | 5 |
| 1605 | 1610 | 1612 | 5 |
| 1605 | 1610 | 1613 | 5 |
| 1611 | 1610 | 1612 | 5 |
| 1611 | 1610 | 1613 | 5 |
| 1612 | 1610 | 1613 | 5 |
| 1610 | 1613 | 1614 | 5 |
| 1610 | 1613 | 1615 | 5 |
| 1610 | 1613 | 1640 | 5 |
| 1614 | 1613 | 1615 | 5 |
| 1614 | 1613 | 1640 | 5 |
| 1615 | 1613 | 1640 | 5 |
| 1613 | 1615 | 1616 | 5 |
| 1613 | 1615 | 1617 | 5 |
| 1613 | 1615 | 1618 | 5 |
| 1616 | 1615 | 1617 | 5 |
| 1616 | 1615 | 1618 | 5 |
| 1617 | 1615 | 1618 | 5 |
| 1615 | 1618 | 1619 | 5 |
| 1615 | 1618 | 1620 | 5 |
| 1615 | 1618 | 1621 | 5 |
| 1619 | 1618 | 1620 | 5 |

|      |      |      |   |
|------|------|------|---|
| 1619 | 1618 | 1621 | 5 |
| 1620 | 1618 | 1621 | 5 |
| 1618 | 1621 | 1622 | 5 |
| 1618 | 1621 | 1623 | 5 |
| 1618 | 1621 | 1624 | 5 |
| 1622 | 1621 | 1623 | 5 |
| 1622 | 1621 | 1624 | 5 |
| 1623 | 1621 | 1624 | 5 |
| 1621 | 1624 | 1625 | 5 |
| 1621 | 1624 | 1626 | 5 |
| 1621 | 1624 | 1627 | 5 |
| 1625 | 1624 | 1626 | 5 |
| 1625 | 1624 | 1627 | 5 |
| 1626 | 1624 | 1627 | 5 |
| 1624 | 1627 | 1628 | 5 |
| 1624 | 1627 | 1629 | 5 |
| 1624 | 1627 | 1630 | 5 |
| 1628 | 1627 | 1629 | 5 |
| 1628 | 1627 | 1630 | 5 |
| 1629 | 1627 | 1630 | 5 |
| 1627 | 1630 | 1631 | 5 |
| 1627 | 1630 | 1632 | 5 |
| 1627 | 1630 | 1633 | 5 |
| 1631 | 1630 | 1632 | 5 |
| 1631 | 1630 | 1633 | 5 |
| 1632 | 1630 | 1633 | 5 |
| 1630 | 1633 | 1634 | 5 |
| 1630 | 1633 | 1635 | 5 |
| 1630 | 1633 | 1636 | 5 |
| 1634 | 1633 | 1635 | 5 |
| 1634 | 1633 | 1636 | 5 |
| 1635 | 1633 | 1636 | 5 |
| 1633 | 1636 | 1637 | 5 |
| 1633 | 1636 | 1638 | 5 |
| 1633 | 1636 | 1639 | 5 |
| 1637 | 1636 | 1638 | 5 |
| 1637 | 1636 | 1639 | 5 |
| 1638 | 1636 | 1639 | 5 |
| 1613 | 1640 | 1641 | 5 |
| 1613 | 1640 | 1642 | 5 |
| 1613 | 1640 | 1668 | 5 |
| 1641 | 1640 | 1642 | 5 |
| 1641 | 1640 | 1668 | 5 |
| 1642 | 1640 | 1668 | 5 |
| 1640 | 1642 | 1643 | 5 |
| 1640 | 1642 | 1644 | 5 |
| 1643 | 1642 | 1644 | 5 |
| 1642 | 1644 | 1645 | 5 |
| 1642 | 1644 | 1646 | 5 |
| 1645 | 1644 | 1646 | 5 |
| 1644 | 1646 | 1647 | 5 |
| 1644 | 1646 | 1648 | 5 |
| 1644 | 1646 | 1649 | 5 |
| 1647 | 1646 | 1648 | 5 |

|      |      |      |   |
|------|------|------|---|
| 1647 | 1646 | 1649 | 5 |
| 1648 | 1646 | 1649 | 5 |
| 1646 | 1649 | 1650 | 5 |
| 1646 | 1649 | 1651 | 5 |
| 1646 | 1649 | 1652 | 5 |
| 1650 | 1649 | 1651 | 5 |
| 1650 | 1649 | 1652 | 5 |
| 1651 | 1649 | 1652 | 5 |
| 1649 | 1652 | 1653 | 5 |
| 1649 | 1652 | 1654 | 5 |
| 1649 | 1652 | 1655 | 5 |
| 1653 | 1652 | 1654 | 5 |
| 1653 | 1652 | 1655 | 5 |
| 1654 | 1652 | 1655 | 5 |
| 1652 | 1655 | 1656 | 5 |
| 1652 | 1655 | 1660 | 5 |
| 1652 | 1655 | 1664 | 5 |
| 1656 | 1655 | 1660 | 5 |
| 1656 | 1655 | 1664 | 5 |
| 1660 | 1655 | 1664 | 5 |
| 1655 | 1656 | 1657 | 5 |
| 1655 | 1656 | 1658 | 5 |
| 1655 | 1656 | 1659 | 5 |
| 1657 | 1656 | 1658 | 5 |
| 1657 | 1656 | 1659 | 5 |
| 1658 | 1656 | 1659 | 5 |
| 1655 | 1660 | 1661 | 5 |
| 1655 | 1660 | 1662 | 5 |
| 1655 | 1660 | 1663 | 5 |
| 1661 | 1660 | 1662 | 5 |
| 1661 | 1660 | 1663 | 5 |
| 1662 | 1660 | 1663 | 5 |
| 1655 | 1664 | 1665 | 5 |
| 1655 | 1664 | 1666 | 5 |
| 1655 | 1664 | 1667 | 5 |
| 1665 | 1664 | 1666 | 5 |
| 1665 | 1664 | 1667 | 5 |
| 1666 | 1664 | 1667 | 5 |
| 1640 | 1668 | 1669 | 5 |
| 1640 | 1668 | 1670 | 5 |
| 1640 | 1668 | 1673 | 5 |
| 1669 | 1668 | 1670 | 5 |
| 1669 | 1668 | 1673 | 5 |
| 1670 | 1668 | 1673 | 5 |
| 1668 | 1670 | 1671 | 5 |
| 1668 | 1670 | 1672 | 5 |
| 1671 | 1670 | 1672 | 5 |
| 1668 | 1673 | 1674 | 5 |
| 1668 | 1673 | 1675 | 5 |
| 1668 | 1673 | 1676 | 5 |
| 1674 | 1673 | 1675 | 5 |
| 1674 | 1673 | 1676 | 5 |
| 1675 | 1673 | 1676 | 5 |
| 1673 | 1676 | 1677 | 5 |

|      |      |      |   |
|------|------|------|---|
| 1673 | 1676 | 1678 | 5 |
| 1673 | 1676 | 1703 | 5 |
| 1677 | 1676 | 1678 | 5 |
| 1677 | 1676 | 1703 | 5 |
| 1678 | 1676 | 1703 | 5 |
| 1676 | 1678 | 1679 | 5 |
| 1676 | 1678 | 1680 | 5 |
| 1676 | 1678 | 1681 | 5 |
| 1679 | 1678 | 1680 | 5 |
| 1679 | 1678 | 1681 | 5 |
| 1680 | 1678 | 1681 | 5 |
| 1678 | 1681 | 1682 | 5 |
| 1678 | 1681 | 1683 | 5 |
| 1678 | 1681 | 1684 | 5 |
| 1682 | 1681 | 1683 | 5 |
| 1682 | 1681 | 1684 | 5 |
| 1683 | 1681 | 1684 | 5 |
| 1681 | 1684 | 1685 | 5 |
| 1681 | 1684 | 1686 | 5 |
| 1681 | 1684 | 1687 | 5 |
| 1685 | 1684 | 1686 | 5 |
| 1685 | 1684 | 1687 | 5 |
| 1686 | 1684 | 1687 | 5 |
| 1684 | 1687 | 1688 | 5 |
| 1684 | 1687 | 1689 | 5 |
| 1684 | 1687 | 1690 | 5 |
| 1688 | 1687 | 1689 | 5 |
| 1688 | 1687 | 1690 | 5 |
| 1689 | 1687 | 1690 | 5 |
| 1687 | 1690 | 1691 | 5 |
| 1687 | 1690 | 1692 | 5 |
| 1687 | 1690 | 1693 | 5 |
| 1691 | 1690 | 1692 | 5 |
| 1691 | 1690 | 1693 | 5 |
| 1692 | 1690 | 1693 | 5 |
| 1690 | 1693 | 1694 | 5 |
| 1690 | 1693 | 1695 | 5 |
| 1690 | 1693 | 1696 | 5 |
| 1694 | 1693 | 1695 | 5 |
| 1694 | 1693 | 1696 | 5 |
| 1695 | 1693 | 1696 | 5 |
| 1693 | 1696 | 1697 | 5 |
| 1693 | 1696 | 1698 | 5 |
| 1693 | 1696 | 1699 | 5 |
| 1697 | 1696 | 1698 | 5 |
| 1697 | 1696 | 1699 | 5 |
| 1698 | 1696 | 1699 | 5 |
| 1696 | 1699 | 1700 | 5 |
| 1696 | 1699 | 1701 | 5 |
| 1696 | 1699 | 1702 | 5 |
| 1700 | 1699 | 1701 | 5 |
| 1700 | 1699 | 1702 | 5 |
| 1701 | 1699 | 1702 | 5 |
| 1676 | 1703 | 1704 | 5 |

|      |      |      |   |
|------|------|------|---|
| 1676 | 1703 | 1705 | 5 |
| 1676 | 1703 | 1731 | 5 |
| 1704 | 1703 | 1705 | 5 |
| 1704 | 1703 | 1731 | 5 |
| 1705 | 1703 | 1731 | 5 |
| 1703 | 1705 | 1706 | 5 |
| 1703 | 1705 | 1707 | 5 |
| 1706 | 1705 | 1707 | 5 |
| 1705 | 1707 | 1708 | 5 |
| 1705 | 1707 | 1709 | 5 |
| 1708 | 1707 | 1709 | 5 |
| 1707 | 1709 | 1710 | 5 |
| 1707 | 1709 | 1711 | 5 |
| 1707 | 1709 | 1712 | 5 |
| 1710 | 1709 | 1711 | 5 |
| 1710 | 1709 | 1712 | 5 |
| 1711 | 1709 | 1712 | 5 |
| 1709 | 1712 | 1713 | 5 |
| 1709 | 1712 | 1714 | 5 |
| 1709 | 1712 | 1715 | 5 |
| 1713 | 1712 | 1714 | 5 |
| 1713 | 1712 | 1715 | 5 |
| 1714 | 1712 | 1715 | 5 |
| 1712 | 1715 | 1716 | 5 |
| 1712 | 1715 | 1717 | 5 |
| 1712 | 1715 | 1718 | 5 |
| 1716 | 1715 | 1717 | 5 |
| 1716 | 1715 | 1718 | 5 |
| 1717 | 1715 | 1718 | 5 |
| 1715 | 1718 | 1719 | 5 |
| 1715 | 1718 | 1723 | 5 |
| 1715 | 1718 | 1727 | 5 |
| 1719 | 1718 | 1723 | 5 |
| 1719 | 1718 | 1727 | 5 |
| 1723 | 1718 | 1727 | 5 |
| 1718 | 1719 | 1720 | 5 |
| 1718 | 1719 | 1721 | 5 |
| 1718 | 1719 | 1722 | 5 |
| 1720 | 1719 | 1721 | 5 |
| 1720 | 1719 | 1722 | 5 |
| 1721 | 1719 | 1722 | 5 |
| 1718 | 1723 | 1724 | 5 |
| 1718 | 1723 | 1725 | 5 |
| 1718 | 1723 | 1726 | 5 |
| 1724 | 1723 | 1725 | 5 |
| 1724 | 1723 | 1726 | 5 |
| 1725 | 1723 | 1726 | 5 |
| 1718 | 1727 | 1728 | 5 |
| 1718 | 1727 | 1729 | 5 |
| 1718 | 1727 | 1730 | 5 |
| 1728 | 1727 | 1729 | 5 |
| 1728 | 1727 | 1730 | 5 |
| 1729 | 1727 | 1730 | 5 |
| 1703 | 1731 | 1732 | 5 |

|      |      |      |   |
|------|------|------|---|
| 1703 | 1731 | 1733 | 5 |
| 1703 | 1731 | 1736 | 5 |
| 1732 | 1731 | 1733 | 5 |
| 1732 | 1731 | 1736 | 5 |
| 1733 | 1731 | 1736 | 5 |
| 1731 | 1733 | 1734 | 5 |
| 1731 | 1733 | 1735 | 5 |
| 1734 | 1733 | 1735 | 5 |
| 1731 | 1736 | 1737 | 5 |
| 1731 | 1736 | 1738 | 5 |
| 1731 | 1736 | 1739 | 5 |
| 1737 | 1736 | 1738 | 5 |
| 1737 | 1736 | 1739 | 5 |
| 1738 | 1736 | 1739 | 5 |
| 1736 | 1739 | 1740 | 5 |
| 1736 | 1739 | 1741 | 5 |
| 1736 | 1739 | 1766 | 5 |
| 1740 | 1739 | 1741 | 5 |
| 1740 | 1739 | 1766 | 5 |
| 1741 | 1739 | 1766 | 5 |
| 1739 | 1741 | 1742 | 5 |
| 1739 | 1741 | 1743 | 5 |
| 1739 | 1741 | 1744 | 5 |
| 1742 | 1741 | 1743 | 5 |
| 1742 | 1741 | 1744 | 5 |
| 1743 | 1741 | 1744 | 5 |
| 1741 | 1744 | 1745 | 5 |
| 1741 | 1744 | 1746 | 5 |
| 1741 | 1744 | 1747 | 5 |
| 1745 | 1744 | 1746 | 5 |
| 1745 | 1744 | 1747 | 5 |
| 1746 | 1744 | 1747 | 5 |
| 1744 | 1747 | 1748 | 5 |
| 1744 | 1747 | 1749 | 5 |
| 1744 | 1747 | 1750 | 5 |
| 1748 | 1747 | 1749 | 5 |
| 1748 | 1747 | 1750 | 5 |
| 1749 | 1747 | 1750 | 5 |
| 1747 | 1750 | 1751 | 5 |
| 1747 | 1750 | 1752 | 5 |
| 1747 | 1750 | 1753 | 5 |
| 1751 | 1750 | 1752 | 5 |
| 1751 | 1750 | 1753 | 5 |
| 1752 | 1750 | 1753 | 5 |
| 1750 | 1753 | 1754 | 5 |
| 1750 | 1753 | 1755 | 5 |
| 1750 | 1753 | 1756 | 5 |
| 1754 | 1753 | 1755 | 5 |
| 1754 | 1753 | 1756 | 5 |
| 1755 | 1753 | 1756 | 5 |
| 1753 | 1756 | 1757 | 5 |
| 1753 | 1756 | 1758 | 5 |
| 1753 | 1756 | 1759 | 5 |
| 1757 | 1756 | 1758 | 5 |



|      |      |      |   |
|------|------|------|---|
| 1757 | 1756 | 1759 | 5 |
| 1758 | 1756 | 1759 | 5 |
| 1756 | 1759 | 1760 | 5 |
| 1756 | 1759 | 1761 | 5 |
| 1756 | 1759 | 1762 | 5 |
| 1760 | 1759 | 1761 | 5 |
| 1760 | 1759 | 1762 | 5 |
| 1761 | 1759 | 1762 | 5 |
| 1759 | 1762 | 1763 | 5 |
| 1759 | 1762 | 1764 | 5 |
| 1759 | 1762 | 1765 | 5 |
| 1763 | 1762 | 1764 | 5 |
| 1763 | 1762 | 1765 | 5 |
| 1764 | 1762 | 1765 | 5 |
| 1739 | 1766 | 1767 | 5 |
| 1739 | 1766 | 1768 | 5 |
| 1739 | 1766 | 1794 | 5 |
| 1767 | 1766 | 1768 | 5 |
| 1767 | 1766 | 1794 | 5 |
| 1768 | 1766 | 1794 | 5 |
| 1766 | 1768 | 1769 | 5 |
| 1766 | 1768 | 1770 | 5 |
| 1769 | 1768 | 1770 | 5 |
| 1768 | 1770 | 1771 | 5 |
| 1768 | 1770 | 1772 | 5 |
| 1771 | 1770 | 1772 | 5 |
| 1770 | 1772 | 1773 | 5 |
| 1770 | 1772 | 1774 | 5 |
| 1770 | 1772 | 1775 | 5 |
| 1773 | 1772 | 1774 | 5 |
| 1773 | 1772 | 1775 | 5 |
| 1774 | 1772 | 1775 | 5 |
| 1772 | 1775 | 1776 | 5 |
| 1772 | 1775 | 1777 | 5 |
| 1772 | 1775 | 1778 | 5 |
| 1776 | 1775 | 1777 | 5 |
| 1776 | 1775 | 1778 | 5 |
| 1777 | 1775 | 1778 | 5 |
| 1775 | 1778 | 1779 | 5 |
| 1775 | 1778 | 1780 | 5 |
| 1775 | 1778 | 1781 | 5 |
| 1779 | 1778 | 1780 | 5 |
| 1779 | 1778 | 1781 | 5 |
| 1780 | 1778 | 1781 | 5 |
| 1778 | 1781 | 1782 | 5 |
| 1778 | 1781 | 1786 | 5 |
| 1778 | 1781 | 1790 | 5 |
| 1782 | 1781 | 1786 | 5 |
| 1782 | 1781 | 1790 | 5 |
| 1786 | 1781 | 1790 | 5 |
| 1781 | 1782 | 1783 | 5 |
| 1781 | 1782 | 1784 | 5 |
| 1781 | 1782 | 1785 | 5 |
| 1783 | 1782 | 1784 | 5 |

|      |      |      |   |
|------|------|------|---|
| 1783 | 1782 | 1785 | 5 |
| 1784 | 1782 | 1785 | 5 |
| 1781 | 1786 | 1787 | 5 |
| 1781 | 1786 | 1788 | 5 |
| 1781 | 1786 | 1789 | 5 |
| 1787 | 1786 | 1788 | 5 |
| 1787 | 1786 | 1789 | 5 |
| 1788 | 1786 | 1789 | 5 |
| 1781 | 1790 | 1791 | 5 |
| 1781 | 1790 | 1792 | 5 |
| 1781 | 1790 | 1793 | 5 |
| 1791 | 1790 | 1792 | 5 |
| 1791 | 1790 | 1793 | 5 |
| 1792 | 1790 | 1793 | 5 |
| 1766 | 1794 | 1795 | 5 |
| 1766 | 1794 | 1796 | 5 |
| 1766 | 1794 | 1799 | 5 |
| 1795 | 1794 | 1796 | 5 |
| 1795 | 1794 | 1799 | 5 |
| 1796 | 1794 | 1799 | 5 |
| 1794 | 1796 | 1797 | 5 |
| 1794 | 1796 | 1798 | 5 |
| 1797 | 1796 | 1798 | 5 |
| 1794 | 1799 | 1800 | 5 |
| 1794 | 1799 | 1801 | 5 |
| 1794 | 1799 | 1802 | 5 |
| 1800 | 1799 | 1801 | 5 |
| 1800 | 1799 | 1802 | 5 |
| 1801 | 1799 | 1802 | 5 |
| 1799 | 1802 | 1803 | 5 |
| 1799 | 1802 | 1804 | 5 |
| 1799 | 1802 | 1829 | 5 |
| 1803 | 1802 | 1804 | 5 |
| 1803 | 1802 | 1829 | 5 |
| 1804 | 1802 | 1829 | 5 |
| 1802 | 1804 | 1805 | 5 |
| 1802 | 1804 | 1806 | 5 |
| 1802 | 1804 | 1807 | 5 |
| 1805 | 1804 | 1806 | 5 |
| 1805 | 1804 | 1807 | 5 |
| 1806 | 1804 | 1807 | 5 |
| 1804 | 1807 | 1808 | 5 |
| 1804 | 1807 | 1809 | 5 |
| 1804 | 1807 | 1810 | 5 |
| 1808 | 1807 | 1809 | 5 |
| 1808 | 1807 | 1810 | 5 |
| 1809 | 1807 | 1810 | 5 |
| 1807 | 1810 | 1811 | 5 |
| 1807 | 1810 | 1812 | 5 |
| 1807 | 1810 | 1813 | 5 |
| 1811 | 1810 | 1812 | 5 |
| 1811 | 1810 | 1813 | 5 |
| 1812 | 1810 | 1813 | 5 |
| 1810 | 1813 | 1814 | 5 |

|      |      |      |   |
|------|------|------|---|
| 1810 | 1813 | 1815 | 5 |
| 1810 | 1813 | 1816 | 5 |
| 1814 | 1813 | 1815 | 5 |
| 1814 | 1813 | 1816 | 5 |
| 1815 | 1813 | 1816 | 5 |
| 1813 | 1816 | 1817 | 5 |
| 1813 | 1816 | 1818 | 5 |
| 1813 | 1816 | 1819 | 5 |
| 1817 | 1816 | 1818 | 5 |
| 1817 | 1816 | 1819 | 5 |
| 1818 | 1816 | 1819 | 5 |
| 1816 | 1819 | 1820 | 5 |
| 1816 | 1819 | 1821 | 5 |
| 1816 | 1819 | 1822 | 5 |
| 1820 | 1819 | 1821 | 5 |
| 1820 | 1819 | 1822 | 5 |
| 1821 | 1819 | 1822 | 5 |
| 1819 | 1822 | 1823 | 5 |
| 1819 | 1822 | 1824 | 5 |
| 1819 | 1822 | 1825 | 5 |
| 1823 | 1822 | 1824 | 5 |
| 1823 | 1822 | 1825 | 5 |
| 1824 | 1822 | 1825 | 5 |
| 1822 | 1825 | 1826 | 5 |
| 1822 | 1825 | 1827 | 5 |
| 1822 | 1825 | 1828 | 5 |
| 1826 | 1825 | 1827 | 5 |
| 1826 | 1825 | 1828 | 5 |
| 1827 | 1825 | 1828 | 5 |
| 1802 | 1829 | 1830 | 5 |
| 1802 | 1829 | 1831 | 5 |
| 1802 | 1829 | 1857 | 5 |
| 1830 | 1829 | 1831 | 5 |
| 1830 | 1829 | 1857 | 5 |
| 1831 | 1829 | 1857 | 5 |
| 1829 | 1831 | 1832 | 5 |
| 1829 | 1831 | 1833 | 5 |
| 1832 | 1831 | 1833 | 5 |
| 1831 | 1833 | 1834 | 5 |
| 1831 | 1833 | 1835 | 5 |
| 1834 | 1833 | 1835 | 5 |
| 1833 | 1835 | 1836 | 5 |
| 1833 | 1835 | 1837 | 5 |
| 1833 | 1835 | 1838 | 5 |
| 1836 | 1835 | 1837 | 5 |
| 1836 | 1835 | 1838 | 5 |
| 1837 | 1835 | 1838 | 5 |
| 1835 | 1838 | 1839 | 5 |
| 1835 | 1838 | 1840 | 5 |
| 1835 | 1838 | 1841 | 5 |
| 1839 | 1838 | 1840 | 5 |
| 1839 | 1838 | 1841 | 5 |
| 1840 | 1838 | 1841 | 5 |
| 1838 | 1841 | 1842 | 5 |

|      |      |      |   |
|------|------|------|---|
| 1838 | 1841 | 1843 | 5 |
| 1838 | 1841 | 1844 | 5 |
| 1842 | 1841 | 1843 | 5 |
| 1842 | 1841 | 1844 | 5 |
| 1843 | 1841 | 1844 | 5 |
| 1841 | 1844 | 1845 | 5 |
| 1841 | 1844 | 1849 | 5 |
| 1841 | 1844 | 1853 | 5 |
| 1845 | 1844 | 1849 | 5 |
| 1845 | 1844 | 1853 | 5 |
| 1849 | 1844 | 1853 | 5 |
| 1844 | 1845 | 1846 | 5 |
| 1844 | 1845 | 1847 | 5 |
| 1844 | 1845 | 1848 | 5 |
| 1846 | 1845 | 1847 | 5 |
| 1846 | 1845 | 1848 | 5 |
| 1847 | 1845 | 1848 | 5 |
| 1844 | 1849 | 1850 | 5 |
| 1844 | 1849 | 1851 | 5 |
| 1844 | 1849 | 1852 | 5 |
| 1850 | 1849 | 1851 | 5 |
| 1850 | 1849 | 1852 | 5 |
| 1851 | 1849 | 1852 | 5 |
| 1844 | 1853 | 1854 | 5 |
| 1844 | 1853 | 1855 | 5 |
| 1844 | 1853 | 1856 | 5 |
| 1854 | 1853 | 1855 | 5 |
| 1854 | 1853 | 1856 | 5 |
| 1855 | 1853 | 1856 | 5 |
| 1829 | 1857 | 1858 | 5 |
| 1829 | 1857 | 1859 | 5 |
| 1829 | 1857 | 1862 | 5 |
| 1858 | 1857 | 1859 | 5 |
| 1858 | 1857 | 1862 | 5 |
| 1859 | 1857 | 1862 | 5 |
| 1857 | 1859 | 1860 | 5 |
| 1857 | 1859 | 1861 | 5 |
| 1860 | 1859 | 1861 | 5 |
| 1857 | 1862 | 1863 | 5 |
| 1857 | 1862 | 1864 | 5 |
| 1857 | 1862 | 1865 | 5 |
| 1863 | 1862 | 1864 | 5 |
| 1863 | 1862 | 1865 | 5 |
| 1864 | 1862 | 1865 | 5 |
| 1862 | 1865 | 1866 | 5 |
| 1862 | 1865 | 1867 | 5 |
| 1862 | 1865 | 1892 | 5 |
| 1866 | 1865 | 1867 | 5 |
| 1866 | 1865 | 1892 | 5 |
| 1867 | 1865 | 1892 | 5 |
| 1865 | 1867 | 1868 | 5 |
| 1865 | 1867 | 1869 | 5 |
| 1865 | 1867 | 1870 | 5 |
| 1868 | 1867 | 1869 | 5 |

|      |      |      |   |
|------|------|------|---|
| 1868 | 1867 | 1870 | 5 |
| 1869 | 1867 | 1870 | 5 |
| 1867 | 1870 | 1871 | 5 |
| 1867 | 1870 | 1872 | 5 |
| 1867 | 1870 | 1873 | 5 |
| 1871 | 1870 | 1872 | 5 |
| 1871 | 1870 | 1873 | 5 |
| 1872 | 1870 | 1873 | 5 |
| 1870 | 1873 | 1874 | 5 |
| 1870 | 1873 | 1875 | 5 |
| 1870 | 1873 | 1876 | 5 |
| 1874 | 1873 | 1875 | 5 |
| 1874 | 1873 | 1876 | 5 |
| 1875 | 1873 | 1876 | 5 |
| 1873 | 1876 | 1877 | 5 |
| 1873 | 1876 | 1878 | 5 |
| 1873 | 1876 | 1879 | 5 |
| 1877 | 1876 | 1878 | 5 |
| 1877 | 1876 | 1879 | 5 |
| 1878 | 1876 | 1879 | 5 |
| 1876 | 1879 | 1880 | 5 |
| 1876 | 1879 | 1881 | 5 |
| 1876 | 1879 | 1882 | 5 |
| 1880 | 1879 | 1881 | 5 |
| 1880 | 1879 | 1882 | 5 |
| 1881 | 1879 | 1882 | 5 |
| 1879 | 1882 | 1883 | 5 |
| 1879 | 1882 | 1884 | 5 |
| 1879 | 1882 | 1885 | 5 |
| 1883 | 1882 | 1884 | 5 |
| 1883 | 1882 | 1885 | 5 |
| 1884 | 1882 | 1885 | 5 |
| 1882 | 1885 | 1886 | 5 |
| 1882 | 1885 | 1887 | 5 |
| 1882 | 1885 | 1888 | 5 |
| 1886 | 1885 | 1887 | 5 |
| 1886 | 1885 | 1888 | 5 |
| 1887 | 1885 | 1888 | 5 |
| 1885 | 1888 | 1889 | 5 |
| 1885 | 1888 | 1890 | 5 |
| 1885 | 1888 | 1891 | 5 |
| 1889 | 1888 | 1890 | 5 |
| 1889 | 1888 | 1891 | 5 |
| 1890 | 1888 | 1891 | 5 |
| 1865 | 1892 | 1893 | 5 |
| 1865 | 1892 | 1894 | 5 |
| 1865 | 1892 | 1920 | 5 |
| 1893 | 1892 | 1894 | 5 |
| 1893 | 1892 | 1920 | 5 |
| 1894 | 1892 | 1920 | 5 |
| 1892 | 1894 | 1895 | 5 |
| 1892 | 1894 | 1896 | 5 |
| 1895 | 1894 | 1896 | 5 |
| 1894 | 1896 | 1897 | 5 |

|      |      |      |   |
|------|------|------|---|
| 1894 | 1896 | 1898 | 5 |
| 1897 | 1896 | 1898 | 5 |
| 1896 | 1898 | 1899 | 5 |
| 1896 | 1898 | 1900 | 5 |
| 1896 | 1898 | 1901 | 5 |
| 1899 | 1898 | 1900 | 5 |
| 1899 | 1898 | 1901 | 5 |
| 1900 | 1898 | 1901 | 5 |
| 1898 | 1901 | 1902 | 5 |
| 1898 | 1901 | 1903 | 5 |
| 1898 | 1901 | 1904 | 5 |
| 1902 | 1901 | 1903 | 5 |
| 1902 | 1901 | 1904 | 5 |
| 1903 | 1901 | 1904 | 5 |
| 1901 | 1904 | 1905 | 5 |
| 1901 | 1904 | 1906 | 5 |
| 1901 | 1904 | 1907 | 5 |
| 1905 | 1904 | 1906 | 5 |
| 1905 | 1904 | 1907 | 5 |
| 1906 | 1904 | 1907 | 5 |
| 1904 | 1907 | 1908 | 5 |
| 1904 | 1907 | 1912 | 5 |
| 1904 | 1907 | 1916 | 5 |
| 1908 | 1907 | 1912 | 5 |
| 1908 | 1907 | 1916 | 5 |
| 1912 | 1907 | 1916 | 5 |
| 1907 | 1908 | 1909 | 5 |
| 1907 | 1908 | 1910 | 5 |
| 1907 | 1908 | 1911 | 5 |
| 1909 | 1908 | 1910 | 5 |
| 1909 | 1908 | 1911 | 5 |
| 1910 | 1908 | 1911 | 5 |
| 1907 | 1912 | 1913 | 5 |
| 1907 | 1912 | 1914 | 5 |
| 1907 | 1912 | 1915 | 5 |
| 1913 | 1912 | 1914 | 5 |
| 1913 | 1912 | 1915 | 5 |
| 1914 | 1912 | 1915 | 5 |
| 1907 | 1916 | 1917 | 5 |
| 1907 | 1916 | 1918 | 5 |
| 1907 | 1916 | 1919 | 5 |
| 1917 | 1916 | 1918 | 5 |
| 1917 | 1916 | 1919 | 5 |
| 1918 | 1916 | 1919 | 5 |
| 1892 | 1920 | 1921 | 5 |
| 1892 | 1920 | 1922 | 5 |
| 1892 | 1920 | 1925 | 5 |
| 1921 | 1920 | 1922 | 5 |
| 1921 | 1920 | 1925 | 5 |
| 1922 | 1920 | 1925 | 5 |
| 1920 | 1922 | 1923 | 5 |
| 1920 | 1922 | 1924 | 5 |
| 1923 | 1922 | 1924 | 5 |
| 1920 | 1925 | 1926 | 5 |

|      |      |      |   |
|------|------|------|---|
| 1920 | 1925 | 1927 | 5 |
| 1920 | 1925 | 1928 | 5 |
| 1926 | 1925 | 1927 | 5 |
| 1926 | 1925 | 1928 | 5 |
| 1927 | 1925 | 1928 | 5 |
| 1925 | 1928 | 1929 | 5 |
| 1925 | 1928 | 1930 | 5 |
| 1925 | 1928 | 1955 | 5 |
| 1929 | 1928 | 1930 | 5 |
| 1929 | 1928 | 1955 | 5 |
| 1930 | 1928 | 1955 | 5 |
| 1928 | 1930 | 1931 | 5 |
| 1928 | 1930 | 1932 | 5 |
| 1928 | 1930 | 1933 | 5 |
| 1931 | 1930 | 1932 | 5 |
| 1931 | 1930 | 1933 | 5 |
| 1932 | 1930 | 1933 | 5 |
| 1930 | 1933 | 1934 | 5 |
| 1930 | 1933 | 1935 | 5 |
| 1930 | 1933 | 1936 | 5 |
| 1934 | 1933 | 1935 | 5 |
| 1934 | 1933 | 1936 | 5 |
| 1935 | 1933 | 1936 | 5 |
| 1933 | 1936 | 1937 | 5 |
| 1933 | 1936 | 1938 | 5 |
| 1933 | 1936 | 1939 | 5 |
| 1937 | 1936 | 1938 | 5 |
| 1937 | 1936 | 1939 | 5 |
| 1938 | 1936 | 1939 | 5 |
| 1936 | 1939 | 1940 | 5 |
| 1936 | 1939 | 1941 | 5 |
| 1936 | 1939 | 1942 | 5 |
| 1940 | 1939 | 1941 | 5 |
| 1940 | 1939 | 1942 | 5 |
| 1941 | 1939 | 1942 | 5 |
| 1939 | 1942 | 1943 | 5 |
| 1939 | 1942 | 1944 | 5 |
| 1939 | 1942 | 1945 | 5 |
| 1943 | 1942 | 1944 | 5 |
| 1943 | 1942 | 1945 | 5 |
| 1944 | 1942 | 1945 | 5 |
| 1942 | 1945 | 1946 | 5 |
| 1942 | 1945 | 1947 | 5 |
| 1942 | 1945 | 1948 | 5 |
| 1946 | 1945 | 1947 | 5 |
| 1946 | 1945 | 1948 | 5 |
| 1947 | 1945 | 1948 | 5 |
| 1945 | 1948 | 1949 | 5 |
| 1945 | 1948 | 1950 | 5 |
| 1945 | 1948 | 1951 | 5 |
| 1949 | 1948 | 1950 | 5 |
| 1949 | 1948 | 1951 | 5 |
| 1950 | 1948 | 1951 | 5 |
| 1948 | 1951 | 1952 | 5 |

|      |      |      |   |
|------|------|------|---|
| 1948 | 1951 | 1953 | 5 |
| 1948 | 1951 | 1954 | 5 |
| 1952 | 1951 | 1953 | 5 |
| 1952 | 1951 | 1954 | 5 |
| 1953 | 1951 | 1954 | 5 |
| 1928 | 1955 | 1956 | 5 |
| 1928 | 1955 | 1957 | 5 |
| 1928 | 1955 | 1983 | 5 |
| 1956 | 1955 | 1957 | 5 |
| 1956 | 1955 | 1983 | 5 |
| 1957 | 1955 | 1983 | 5 |
| 1955 | 1957 | 1958 | 5 |
| 1955 | 1957 | 1959 | 5 |
| 1958 | 1957 | 1959 | 5 |
| 1957 | 1959 | 1960 | 5 |
| 1957 | 1959 | 1961 | 5 |
| 1960 | 1959 | 1961 | 5 |
| 1959 | 1961 | 1962 | 5 |
| 1959 | 1961 | 1963 | 5 |
| 1959 | 1961 | 1964 | 5 |
| 1962 | 1961 | 1963 | 5 |
| 1962 | 1961 | 1964 | 5 |
| 1963 | 1961 | 1964 | 5 |
| 1961 | 1964 | 1965 | 5 |
| 1961 | 1964 | 1966 | 5 |
| 1961 | 1964 | 1967 | 5 |
| 1965 | 1964 | 1966 | 5 |
| 1965 | 1964 | 1967 | 5 |
| 1966 | 1964 | 1967 | 5 |
| 1964 | 1967 | 1968 | 5 |
| 1964 | 1967 | 1969 | 5 |
| 1964 | 1967 | 1970 | 5 |
| 1968 | 1967 | 1969 | 5 |
| 1968 | 1967 | 1970 | 5 |
| 1969 | 1967 | 1970 | 5 |
| 1967 | 1970 | 1971 | 5 |
| 1967 | 1970 | 1975 | 5 |
| 1967 | 1970 | 1979 | 5 |
| 1971 | 1970 | 1975 | 5 |
| 1971 | 1970 | 1979 | 5 |
| 1975 | 1970 | 1979 | 5 |
| 1970 | 1971 | 1972 | 5 |
| 1970 | 1971 | 1973 | 5 |
| 1970 | 1971 | 1974 | 5 |
| 1972 | 1971 | 1973 | 5 |
| 1972 | 1971 | 1974 | 5 |
| 1973 | 1971 | 1974 | 5 |
| 1970 | 1975 | 1976 | 5 |
| 1970 | 1975 | 1977 | 5 |
| 1970 | 1975 | 1978 | 5 |
| 1976 | 1975 | 1977 | 5 |
| 1976 | 1975 | 1978 | 5 |
| 1977 | 1975 | 1978 | 5 |
| 1970 | 1979 | 1980 | 5 |



|      |      |      |   |
|------|------|------|---|
| 1970 | 1979 | 1981 | 5 |
| 1970 | 1979 | 1982 | 5 |
| 1980 | 1979 | 1981 | 5 |
| 1980 | 1979 | 1982 | 5 |
| 1981 | 1979 | 1982 | 5 |
| 1955 | 1983 | 1984 | 5 |
| 1955 | 1983 | 1985 | 5 |
| 1955 | 1983 | 1988 | 5 |
| 1984 | 1983 | 1985 | 5 |
| 1984 | 1983 | 1988 | 5 |
| 1985 | 1983 | 1988 | 5 |
| 1983 | 1985 | 1986 | 5 |
| 1983 | 1985 | 1987 | 5 |
| 1986 | 1985 | 1987 | 5 |
| 1983 | 1988 | 1989 | 5 |
| 1983 | 1988 | 1990 | 5 |
| 1983 | 1988 | 1991 | 5 |
| 1989 | 1988 | 1990 | 5 |
| 1989 | 1988 | 1991 | 5 |
| 1990 | 1988 | 1991 | 5 |
| 1988 | 1991 | 1992 | 5 |
| 1988 | 1991 | 1993 | 5 |
| 1988 | 1991 | 2018 | 5 |
| 1992 | 1991 | 1993 | 5 |
| 1992 | 1991 | 2018 | 5 |
| 1993 | 1991 | 2018 | 5 |
| 1991 | 1993 | 1994 | 5 |
| 1991 | 1993 | 1995 | 5 |
| 1991 | 1993 | 1996 | 5 |
| 1994 | 1993 | 1995 | 5 |
| 1994 | 1993 | 1996 | 5 |
| 1995 | 1993 | 1996 | 5 |
| 1993 | 1996 | 1997 | 5 |
| 1993 | 1996 | 1998 | 5 |
| 1993 | 1996 | 1999 | 5 |
| 1997 | 1996 | 1998 | 5 |
| 1997 | 1996 | 1999 | 5 |
| 1998 | 1996 | 1999 | 5 |
| 1996 | 1999 | 2000 | 5 |
| 1996 | 1999 | 2001 | 5 |
| 1996 | 1999 | 2002 | 5 |
| 2000 | 1999 | 2001 | 5 |
| 2000 | 1999 | 2002 | 5 |
| 2001 | 1999 | 2002 | 5 |
| 1999 | 2002 | 2003 | 5 |
| 1999 | 2002 | 2004 | 5 |
| 1999 | 2002 | 2005 | 5 |
| 2003 | 2002 | 2004 | 5 |
| 2003 | 2002 | 2005 | 5 |
| 2004 | 2002 | 2005 | 5 |
| 2002 | 2005 | 2006 | 5 |
| 2002 | 2005 | 2007 | 5 |
| 2002 | 2005 | 2008 | 5 |
| 2006 | 2005 | 2007 | 5 |

|      |      |      |   |
|------|------|------|---|
| 2006 | 2005 | 2008 | 5 |
| 2007 | 2005 | 2008 | 5 |
| 2005 | 2008 | 2009 | 5 |
| 2005 | 2008 | 2010 | 5 |
| 2005 | 2008 | 2011 | 5 |
| 2009 | 2008 | 2010 | 5 |
| 2009 | 2008 | 2011 | 5 |
| 2010 | 2008 | 2011 | 5 |
| 2008 | 2011 | 2012 | 5 |
| 2008 | 2011 | 2013 | 5 |
| 2008 | 2011 | 2014 | 5 |
| 2012 | 2011 | 2013 | 5 |
| 2012 | 2011 | 2014 | 5 |
| 2013 | 2011 | 2014 | 5 |
| 2011 | 2014 | 2015 | 5 |
| 2011 | 2014 | 2016 | 5 |
| 2011 | 2014 | 2017 | 5 |
| 2015 | 2014 | 2016 | 5 |
| 2015 | 2014 | 2017 | 5 |
| 2016 | 2014 | 2017 | 5 |
| 1991 | 2018 | 2019 | 5 |
| 1991 | 2018 | 2020 | 5 |
| 1991 | 2018 | 2046 | 5 |
| 2019 | 2018 | 2020 | 5 |
| 2019 | 2018 | 2046 | 5 |
| 2020 | 2018 | 2046 | 5 |
| 2018 | 2020 | 2021 | 5 |
| 2018 | 2020 | 2022 | 5 |
| 2021 | 2020 | 2022 | 5 |
| 2020 | 2022 | 2023 | 5 |
| 2020 | 2022 | 2024 | 5 |
| 2023 | 2022 | 2024 | 5 |
| 2022 | 2024 | 2025 | 5 |
| 2022 | 2024 | 2026 | 5 |
| 2022 | 2024 | 2027 | 5 |
| 2025 | 2024 | 2026 | 5 |
| 2025 | 2024 | 2027 | 5 |
| 2026 | 2024 | 2027 | 5 |
| 2024 | 2027 | 2028 | 5 |
| 2024 | 2027 | 2029 | 5 |
| 2024 | 2027 | 2030 | 5 |
| 2028 | 2027 | 2029 | 5 |
| 2028 | 2027 | 2030 | 5 |
| 2029 | 2027 | 2030 | 5 |
| 2027 | 2030 | 2031 | 5 |
| 2027 | 2030 | 2032 | 5 |
| 2027 | 2030 | 2033 | 5 |
| 2031 | 2030 | 2032 | 5 |
| 2031 | 2030 | 2033 | 5 |
| 2032 | 2030 | 2033 | 5 |
| 2030 | 2033 | 2034 | 5 |
| 2030 | 2033 | 2038 | 5 |
| 2030 | 2033 | 2042 | 5 |
| 2034 | 2033 | 2038 | 5 |

|      |      |      |   |
|------|------|------|---|
| 2034 | 2033 | 2042 | 5 |
| 2038 | 2033 | 2042 | 5 |
| 2033 | 2034 | 2035 | 5 |
| 2033 | 2034 | 2036 | 5 |
| 2033 | 2034 | 2037 | 5 |
| 2035 | 2034 | 2036 | 5 |
| 2035 | 2034 | 2037 | 5 |
| 2036 | 2034 | 2037 | 5 |
| 2033 | 2038 | 2039 | 5 |
| 2033 | 2038 | 2040 | 5 |
| 2033 | 2038 | 2041 | 5 |
| 2039 | 2038 | 2040 | 5 |
| 2039 | 2038 | 2041 | 5 |
| 2040 | 2038 | 2041 | 5 |
| 2033 | 2042 | 2043 | 5 |
| 2033 | 2042 | 2044 | 5 |
| 2033 | 2042 | 2045 | 5 |
| 2043 | 2042 | 2044 | 5 |
| 2043 | 2042 | 2045 | 5 |
| 2044 | 2042 | 2045 | 5 |
| 2018 | 2046 | 2047 | 5 |
| 2018 | 2046 | 2048 | 5 |
| 2018 | 2046 | 2051 | 5 |
| 2047 | 2046 | 2048 | 5 |
| 2047 | 2046 | 2051 | 5 |
| 2048 | 2046 | 2051 | 5 |
| 2046 | 2048 | 2049 | 5 |
| 2046 | 2048 | 2050 | 5 |
| 2049 | 2048 | 2050 | 5 |
| 2046 | 2051 | 2052 | 5 |
| 2046 | 2051 | 2053 | 5 |
| 2046 | 2051 | 2054 | 5 |
| 2052 | 2051 | 2053 | 5 |
| 2052 | 2051 | 2054 | 5 |
| 2053 | 2051 | 2054 | 5 |
| 2051 | 2054 | 2055 | 5 |
| 2051 | 2054 | 2056 | 5 |
| 2051 | 2054 | 2081 | 5 |
| 2055 | 2054 | 2056 | 5 |
| 2055 | 2054 | 2081 | 5 |
| 2056 | 2054 | 2081 | 5 |
| 2054 | 2056 | 2057 | 5 |
| 2054 | 2056 | 2058 | 5 |
| 2054 | 2056 | 2059 | 5 |
| 2057 | 2056 | 2058 | 5 |
| 2057 | 2056 | 2059 | 5 |
| 2058 | 2056 | 2059 | 5 |
| 2056 | 2059 | 2060 | 5 |
| 2056 | 2059 | 2061 | 5 |
| 2056 | 2059 | 2062 | 5 |
| 2060 | 2059 | 2061 | 5 |
| 2060 | 2059 | 2062 | 5 |
| 2061 | 2059 | 2062 | 5 |
| 2059 | 2062 | 2063 | 5 |

|      |      |      |   |
|------|------|------|---|
| 2059 | 2062 | 2064 | 5 |
| 2059 | 2062 | 2065 | 5 |
| 2063 | 2062 | 2064 | 5 |
| 2063 | 2062 | 2065 | 5 |
| 2064 | 2062 | 2065 | 5 |
| 2062 | 2065 | 2066 | 5 |
| 2062 | 2065 | 2067 | 5 |
| 2062 | 2065 | 2068 | 5 |
| 2066 | 2065 | 2067 | 5 |
| 2066 | 2065 | 2068 | 5 |
| 2067 | 2065 | 2068 | 5 |
| 2065 | 2068 | 2069 | 5 |
| 2065 | 2068 | 2070 | 5 |
| 2065 | 2068 | 2071 | 5 |
| 2069 | 2068 | 2070 | 5 |
| 2069 | 2068 | 2071 | 5 |
| 2070 | 2068 | 2071 | 5 |
| 2068 | 2071 | 2072 | 5 |
| 2068 | 2071 | 2073 | 5 |
| 2068 | 2071 | 2074 | 5 |
| 2072 | 2071 | 2073 | 5 |
| 2072 | 2071 | 2074 | 5 |
| 2073 | 2071 | 2074 | 5 |
| 2071 | 2074 | 2075 | 5 |
| 2071 | 2074 | 2076 | 5 |
| 2071 | 2074 | 2077 | 5 |
| 2075 | 2074 | 2076 | 5 |
| 2075 | 2074 | 2077 | 5 |
| 2076 | 2074 | 2077 | 5 |
| 2074 | 2077 | 2078 | 5 |
| 2074 | 2077 | 2079 | 5 |
| 2074 | 2077 | 2080 | 5 |
| 2078 | 2077 | 2079 | 5 |
| 2078 | 2077 | 2080 | 5 |
| 2079 | 2077 | 2080 | 5 |
| 2054 | 2081 | 2082 | 5 |
| 2054 | 2081 | 2083 | 5 |
| 2054 | 2081 | 2109 | 5 |
| 2082 | 2081 | 2083 | 5 |
| 2082 | 2081 | 2109 | 5 |
| 2083 | 2081 | 2109 | 5 |
| 2081 | 2083 | 2084 | 5 |
| 2081 | 2083 | 2085 | 5 |
| 2084 | 2083 | 2085 | 5 |
| 2083 | 2085 | 2086 | 5 |
| 2083 | 2085 | 2087 | 5 |
| 2086 | 2085 | 2087 | 5 |
| 2085 | 2087 | 2088 | 5 |
| 2085 | 2087 | 2089 | 5 |
| 2085 | 2087 | 2090 | 5 |
| 2088 | 2087 | 2089 | 5 |
| 2088 | 2087 | 2090 | 5 |
| 2089 | 2087 | 2090 | 5 |
| 2087 | 2090 | 2091 | 5 |

|      |      |      |   |
|------|------|------|---|
| 2087 | 2090 | 2092 | 5 |
| 2087 | 2090 | 2093 | 5 |
| 2091 | 2090 | 2092 | 5 |
| 2091 | 2090 | 2093 | 5 |
| 2092 | 2090 | 2093 | 5 |
| 2090 | 2093 | 2094 | 5 |
| 2090 | 2093 | 2095 | 5 |
| 2090 | 2093 | 2096 | 5 |
| 2094 | 2093 | 2095 | 5 |
| 2094 | 2093 | 2096 | 5 |
| 2095 | 2093 | 2096 | 5 |
| 2093 | 2096 | 2097 | 5 |
| 2093 | 2096 | 2101 | 5 |
| 2093 | 2096 | 2105 | 5 |
| 2097 | 2096 | 2101 | 5 |
| 2097 | 2096 | 2105 | 5 |
| 2101 | 2096 | 2105 | 5 |
| 2096 | 2097 | 2098 | 5 |
| 2096 | 2097 | 2099 | 5 |
| 2096 | 2097 | 2100 | 5 |
| 2098 | 2097 | 2099 | 5 |
| 2098 | 2097 | 2100 | 5 |
| 2099 | 2097 | 2100 | 5 |
| 2096 | 2101 | 2102 | 5 |
| 2096 | 2101 | 2103 | 5 |
| 2096 | 2101 | 2104 | 5 |
| 2102 | 2101 | 2103 | 5 |
| 2102 | 2101 | 2104 | 5 |
| 2103 | 2101 | 2104 | 5 |
| 2096 | 2105 | 2106 | 5 |
| 2096 | 2105 | 2107 | 5 |
| 2096 | 2105 | 2108 | 5 |
| 2106 | 2105 | 2107 | 5 |
| 2106 | 2105 | 2108 | 5 |
| 2107 | 2105 | 2108 | 5 |
| 2081 | 2109 | 2110 | 5 |
| 2081 | 2109 | 2111 | 5 |
| 2081 | 2109 | 2114 | 5 |
| 2110 | 2109 | 2111 | 5 |
| 2110 | 2109 | 2114 | 5 |
| 2111 | 2109 | 2114 | 5 |
| 2109 | 2111 | 2112 | 5 |
| 2109 | 2111 | 2113 | 5 |
| 2112 | 2111 | 2113 | 5 |
| 2109 | 2114 | 2115 | 5 |
| 2109 | 2114 | 2116 | 5 |
| 2109 | 2114 | 2117 | 5 |
| 2115 | 2114 | 2116 | 5 |
| 2115 | 2114 | 2117 | 5 |
| 2116 | 2114 | 2117 | 5 |
| 2114 | 2117 | 2118 | 5 |
| 2114 | 2117 | 2119 | 5 |
| 2114 | 2117 | 2144 | 5 |
| 2118 | 2117 | 2119 | 5 |

|      |      |      |   |
|------|------|------|---|
| 2118 | 2117 | 2144 | 5 |
| 2119 | 2117 | 2144 | 5 |
| 2117 | 2119 | 2120 | 5 |
| 2117 | 2119 | 2121 | 5 |
| 2117 | 2119 | 2122 | 5 |
| 2120 | 2119 | 2121 | 5 |
| 2120 | 2119 | 2122 | 5 |
| 2121 | 2119 | 2122 | 5 |
| 2119 | 2122 | 2123 | 5 |
| 2119 | 2122 | 2124 | 5 |
| 2119 | 2122 | 2125 | 5 |
| 2123 | 2122 | 2124 | 5 |
| 2123 | 2122 | 2125 | 5 |
| 2124 | 2122 | 2125 | 5 |
| 2122 | 2125 | 2126 | 5 |
| 2122 | 2125 | 2127 | 5 |
| 2122 | 2125 | 2128 | 5 |
| 2126 | 2125 | 2127 | 5 |
| 2126 | 2125 | 2128 | 5 |
| 2127 | 2125 | 2128 | 5 |
| 2125 | 2128 | 2129 | 5 |
| 2125 | 2128 | 2130 | 5 |
| 2125 | 2128 | 2131 | 5 |
| 2129 | 2128 | 2130 | 5 |
| 2129 | 2128 | 2131 | 5 |
| 2130 | 2128 | 2131 | 5 |
| 2128 | 2131 | 2132 | 5 |
| 2128 | 2131 | 2133 | 5 |
| 2128 | 2131 | 2134 | 5 |
| 2132 | 2131 | 2133 | 5 |
| 2132 | 2131 | 2134 | 5 |
| 2133 | 2131 | 2134 | 5 |
| 2131 | 2134 | 2135 | 5 |
| 2131 | 2134 | 2136 | 5 |
| 2131 | 2134 | 2137 | 5 |
| 2135 | 2134 | 2136 | 5 |
| 2135 | 2134 | 2137 | 5 |
| 2136 | 2134 | 2137 | 5 |
| 2134 | 2137 | 2138 | 5 |
| 2134 | 2137 | 2139 | 5 |
| 2134 | 2137 | 2140 | 5 |
| 2138 | 2137 | 2139 | 5 |
| 2138 | 2137 | 2140 | 5 |
| 2139 | 2137 | 2140 | 5 |
| 2137 | 2140 | 2141 | 5 |
| 2137 | 2140 | 2142 | 5 |
| 2137 | 2140 | 2143 | 5 |
| 2141 | 2140 | 2142 | 5 |
| 2141 | 2140 | 2143 | 5 |
| 2142 | 2140 | 2143 | 5 |
| 2117 | 2144 | 2145 | 5 |
| 2117 | 2144 | 2146 | 5 |
| 2117 | 2144 | 2172 | 5 |
| 2145 | 2144 | 2146 | 5 |

|      |      |      |   |
|------|------|------|---|
| 2145 | 2144 | 2172 | 5 |
| 2146 | 2144 | 2172 | 5 |
| 2144 | 2146 | 2147 | 5 |
| 2144 | 2146 | 2148 | 5 |
| 2147 | 2146 | 2148 | 5 |
| 2146 | 2148 | 2149 | 5 |
| 2146 | 2148 | 2150 | 5 |
| 2149 | 2148 | 2150 | 5 |
| 2148 | 2150 | 2151 | 5 |
| 2148 | 2150 | 2152 | 5 |
| 2148 | 2150 | 2153 | 5 |
| 2151 | 2150 | 2152 | 5 |
| 2151 | 2150 | 2153 | 5 |
| 2152 | 2150 | 2153 | 5 |
| 2150 | 2153 | 2154 | 5 |
| 2150 | 2153 | 2155 | 5 |
| 2150 | 2153 | 2156 | 5 |
| 2154 | 2153 | 2155 | 5 |
| 2154 | 2153 | 2156 | 5 |
| 2155 | 2153 | 2156 | 5 |
| 2153 | 2156 | 2157 | 5 |
| 2153 | 2156 | 2158 | 5 |
| 2153 | 2156 | 2159 | 5 |
| 2157 | 2156 | 2158 | 5 |
| 2157 | 2156 | 2159 | 5 |
| 2158 | 2156 | 2159 | 5 |
| 2156 | 2159 | 2160 | 5 |
| 2156 | 2159 | 2164 | 5 |
| 2156 | 2159 | 2168 | 5 |
| 2160 | 2159 | 2164 | 5 |
| 2160 | 2159 | 2168 | 5 |
| 2164 | 2159 | 2168 | 5 |
| 2159 | 2160 | 2161 | 5 |
| 2159 | 2160 | 2162 | 5 |
| 2159 | 2160 | 2163 | 5 |
| 2161 | 2160 | 2162 | 5 |
| 2161 | 2160 | 2163 | 5 |
| 2162 | 2160 | 2163 | 5 |
| 2159 | 2164 | 2165 | 5 |
| 2159 | 2164 | 2166 | 5 |
| 2159 | 2164 | 2167 | 5 |
| 2165 | 2164 | 2166 | 5 |
| 2165 | 2164 | 2167 | 5 |
| 2166 | 2164 | 2167 | 5 |
| 2159 | 2168 | 2169 | 5 |
| 2159 | 2168 | 2170 | 5 |
| 2159 | 2168 | 2171 | 5 |
| 2169 | 2168 | 2170 | 5 |
| 2169 | 2168 | 2171 | 5 |
| 2170 | 2168 | 2171 | 5 |
| 2144 | 2172 | 2173 | 5 |
| 2144 | 2172 | 2174 | 5 |
| 2144 | 2172 | 2177 | 5 |
| 2173 | 2172 | 2174 | 5 |

|      |      |      |   |
|------|------|------|---|
| 2173 | 2172 | 2177 | 5 |
| 2174 | 2172 | 2177 | 5 |
| 2172 | 2174 | 2175 | 5 |
| 2172 | 2174 | 2176 | 5 |
| 2175 | 2174 | 2176 | 5 |
| 2172 | 2177 | 2178 | 5 |
| 2172 | 2177 | 2179 | 5 |
| 2172 | 2177 | 2180 | 5 |
| 2178 | 2177 | 2179 | 5 |
| 2178 | 2177 | 2180 | 5 |
| 2179 | 2177 | 2180 | 5 |
| 2177 | 2180 | 2181 | 5 |
| 2177 | 2180 | 2182 | 5 |
| 2177 | 2180 | 2207 | 5 |
| 2181 | 2180 | 2182 | 5 |
| 2181 | 2180 | 2207 | 5 |
| 2182 | 2180 | 2207 | 5 |
| 2180 | 2182 | 2183 | 5 |
| 2180 | 2182 | 2184 | 5 |
| 2180 | 2182 | 2185 | 5 |
| 2183 | 2182 | 2184 | 5 |
| 2183 | 2182 | 2185 | 5 |
| 2184 | 2182 | 2185 | 5 |
| 2182 | 2185 | 2186 | 5 |
| 2182 | 2185 | 2187 | 5 |
| 2182 | 2185 | 2188 | 5 |
| 2186 | 2185 | 2187 | 5 |
| 2186 | 2185 | 2188 | 5 |
| 2187 | 2185 | 2188 | 5 |
| 2185 | 2188 | 2189 | 5 |
| 2185 | 2188 | 2190 | 5 |
| 2185 | 2188 | 2191 | 5 |
| 2189 | 2188 | 2190 | 5 |
| 2189 | 2188 | 2191 | 5 |
| 2190 | 2188 | 2191 | 5 |
| 2188 | 2191 | 2192 | 5 |
| 2188 | 2191 | 2193 | 5 |
| 2188 | 2191 | 2194 | 5 |
| 2192 | 2191 | 2193 | 5 |
| 2192 | 2191 | 2194 | 5 |
| 2193 | 2191 | 2194 | 5 |
| 2191 | 2194 | 2195 | 5 |
| 2191 | 2194 | 2196 | 5 |
| 2191 | 2194 | 2197 | 5 |
| 2195 | 2194 | 2196 | 5 |
| 2195 | 2194 | 2197 | 5 |
| 2196 | 2194 | 2197 | 5 |
| 2194 | 2197 | 2198 | 5 |
| 2194 | 2197 | 2199 | 5 |
| 2194 | 2197 | 2200 | 5 |
| 2198 | 2197 | 2199 | 5 |
| 2198 | 2197 | 2200 | 5 |
| 2199 | 2197 | 2200 | 5 |
| 2197 | 2200 | 2201 | 5 |



|      |      |      |   |
|------|------|------|---|
| 2197 | 2200 | 2202 | 5 |
| 2197 | 2200 | 2203 | 5 |
| 2201 | 2200 | 2202 | 5 |
| 2201 | 2200 | 2203 | 5 |
| 2202 | 2200 | 2203 | 5 |
| 2200 | 2203 | 2204 | 5 |
| 2200 | 2203 | 2205 | 5 |
| 2200 | 2203 | 2206 | 5 |
| 2204 | 2203 | 2205 | 5 |
| 2204 | 2203 | 2206 | 5 |
| 2205 | 2203 | 2206 | 5 |
| 2180 | 2207 | 2208 | 5 |
| 2180 | 2207 | 2209 | 5 |
| 2180 | 2207 | 2235 | 5 |
| 2208 | 2207 | 2209 | 5 |
| 2208 | 2207 | 2235 | 5 |
| 2209 | 2207 | 2235 | 5 |
| 2207 | 2209 | 2210 | 5 |
| 2207 | 2209 | 2211 | 5 |
| 2210 | 2209 | 2211 | 5 |
| 2209 | 2211 | 2212 | 5 |
| 2209 | 2211 | 2213 | 5 |
| 2212 | 2211 | 2213 | 5 |
| 2211 | 2213 | 2214 | 5 |
| 2211 | 2213 | 2215 | 5 |
| 2211 | 2213 | 2216 | 5 |
| 2214 | 2213 | 2215 | 5 |
| 2214 | 2213 | 2216 | 5 |
| 2215 | 2213 | 2216 | 5 |
| 2213 | 2216 | 2217 | 5 |
| 2213 | 2216 | 2218 | 5 |
| 2213 | 2216 | 2219 | 5 |
| 2217 | 2216 | 2218 | 5 |
| 2217 | 2216 | 2219 | 5 |
| 2218 | 2216 | 2219 | 5 |
| 2216 | 2219 | 2220 | 5 |
| 2216 | 2219 | 2221 | 5 |
| 2216 | 2219 | 2222 | 5 |
| 2220 | 2219 | 2221 | 5 |
| 2220 | 2219 | 2222 | 5 |
| 2221 | 2219 | 2222 | 5 |
| 2219 | 2222 | 2223 | 5 |
| 2219 | 2222 | 2227 | 5 |
| 2219 | 2222 | 2231 | 5 |
| 2223 | 2222 | 2227 | 5 |
| 2223 | 2222 | 2231 | 5 |
| 2227 | 2222 | 2231 | 5 |
| 2222 | 2223 | 2224 | 5 |
| 2222 | 2223 | 2225 | 5 |
| 2222 | 2223 | 2226 | 5 |
| 2224 | 2223 | 2225 | 5 |
| 2224 | 2223 | 2226 | 5 |
| 2225 | 2223 | 2226 | 5 |
| 2222 | 2227 | 2228 | 5 |

|      |      |      |   |
|------|------|------|---|
| 2222 | 2227 | 2229 | 5 |
| 2222 | 2227 | 2230 | 5 |
| 2228 | 2227 | 2229 | 5 |
| 2228 | 2227 | 2230 | 5 |
| 2229 | 2227 | 2230 | 5 |
| 2222 | 2231 | 2232 | 5 |
| 2222 | 2231 | 2233 | 5 |
| 2222 | 2231 | 2234 | 5 |
| 2232 | 2231 | 2233 | 5 |
| 2232 | 2231 | 2234 | 5 |
| 2233 | 2231 | 2234 | 5 |
| 2207 | 2235 | 2236 | 5 |
| 2207 | 2235 | 2237 | 5 |
| 2207 | 2235 | 2240 | 5 |
| 2236 | 2235 | 2237 | 5 |
| 2236 | 2235 | 2240 | 5 |
| 2237 | 2235 | 2240 | 5 |
| 2235 | 2237 | 2238 | 5 |
| 2235 | 2237 | 2239 | 5 |
| 2238 | 2237 | 2239 | 5 |
| 2235 | 2240 | 2241 | 5 |
| 2235 | 2240 | 2242 | 5 |
| 2235 | 2240 | 2243 | 5 |
| 2241 | 2240 | 2242 | 5 |
| 2241 | 2240 | 2243 | 5 |
| 2242 | 2240 | 2243 | 5 |
| 2240 | 2243 | 2244 | 5 |
| 2240 | 2243 | 2245 | 5 |
| 2240 | 2243 | 2270 | 5 |
| 2244 | 2243 | 2245 | 5 |
| 2244 | 2243 | 2270 | 5 |
| 2245 | 2243 | 2270 | 5 |
| 2243 | 2245 | 2246 | 5 |
| 2243 | 2245 | 2247 | 5 |
| 2243 | 2245 | 2248 | 5 |
| 2246 | 2245 | 2247 | 5 |
| 2246 | 2245 | 2248 | 5 |
| 2247 | 2245 | 2248 | 5 |
| 2245 | 2248 | 2249 | 5 |
| 2245 | 2248 | 2250 | 5 |
| 2245 | 2248 | 2251 | 5 |
| 2249 | 2248 | 2250 | 5 |
| 2249 | 2248 | 2251 | 5 |
| 2250 | 2248 | 2251 | 5 |
| 2248 | 2251 | 2252 | 5 |
| 2248 | 2251 | 2253 | 5 |
| 2248 | 2251 | 2254 | 5 |
| 2252 | 2251 | 2253 | 5 |
| 2252 | 2251 | 2254 | 5 |
| 2253 | 2251 | 2254 | 5 |
| 2251 | 2254 | 2255 | 5 |
| 2251 | 2254 | 2256 | 5 |
| 2251 | 2254 | 2257 | 5 |
| 2255 | 2254 | 2256 | 5 |

|      |      |      |   |
|------|------|------|---|
| 2255 | 2254 | 2257 | 5 |
| 2256 | 2254 | 2257 | 5 |
| 2254 | 2257 | 2258 | 5 |
| 2254 | 2257 | 2259 | 5 |
| 2254 | 2257 | 2260 | 5 |
| 2258 | 2257 | 2259 | 5 |
| 2258 | 2257 | 2260 | 5 |
| 2259 | 2257 | 2260 | 5 |
| 2257 | 2260 | 2261 | 5 |
| 2257 | 2260 | 2262 | 5 |
| 2257 | 2260 | 2263 | 5 |
| 2261 | 2260 | 2262 | 5 |
| 2261 | 2260 | 2263 | 5 |
| 2262 | 2260 | 2263 | 5 |
| 2260 | 2263 | 2264 | 5 |
| 2260 | 2263 | 2265 | 5 |
| 2260 | 2263 | 2266 | 5 |
| 2264 | 2263 | 2265 | 5 |
| 2264 | 2263 | 2266 | 5 |
| 2265 | 2263 | 2266 | 5 |
| 2263 | 2266 | 2267 | 5 |
| 2263 | 2266 | 2268 | 5 |
| 2263 | 2266 | 2269 | 5 |
| 2267 | 2266 | 2268 | 5 |
| 2267 | 2266 | 2269 | 5 |
| 2268 | 2266 | 2269 | 5 |
| 2243 | 2270 | 2271 | 5 |
| 2243 | 2270 | 2272 | 5 |
| 2243 | 2270 | 2298 | 5 |
| 2271 | 2270 | 2272 | 5 |
| 2271 | 2270 | 2298 | 5 |
| 2272 | 2270 | 2298 | 5 |
| 2270 | 2272 | 2273 | 5 |
| 2270 | 2272 | 2274 | 5 |
| 2273 | 2272 | 2274 | 5 |
| 2272 | 2274 | 2275 | 5 |
| 2272 | 2274 | 2276 | 5 |
| 2275 | 2274 | 2276 | 5 |
| 2274 | 2276 | 2277 | 5 |
| 2274 | 2276 | 2278 | 5 |
| 2274 | 2276 | 2279 | 5 |
| 2277 | 2276 | 2278 | 5 |
| 2277 | 2276 | 2279 | 5 |
| 2278 | 2276 | 2279 | 5 |
| 2276 | 2279 | 2280 | 5 |
| 2276 | 2279 | 2281 | 5 |
| 2276 | 2279 | 2282 | 5 |
| 2280 | 2279 | 2281 | 5 |
| 2280 | 2279 | 2282 | 5 |
| 2281 | 2279 | 2282 | 5 |
| 2279 | 2282 | 2283 | 5 |
| 2279 | 2282 | 2284 | 5 |
| 2279 | 2282 | 2285 | 5 |
| 2283 | 2282 | 2284 | 5 |

|      |      |      |   |
|------|------|------|---|
| 2283 | 2282 | 2285 | 5 |
| 2284 | 2282 | 2285 | 5 |
| 2282 | 2285 | 2286 | 5 |
| 2282 | 2285 | 2290 | 5 |
| 2282 | 2285 | 2294 | 5 |
| 2286 | 2285 | 2290 | 5 |
| 2286 | 2285 | 2294 | 5 |
| 2290 | 2285 | 2294 | 5 |
| 2285 | 2286 | 2287 | 5 |
| 2285 | 2286 | 2288 | 5 |
| 2285 | 2286 | 2289 | 5 |
| 2287 | 2286 | 2288 | 5 |
| 2287 | 2286 | 2289 | 5 |
| 2288 | 2286 | 2289 | 5 |
| 2285 | 2290 | 2291 | 5 |
| 2285 | 2290 | 2292 | 5 |
| 2285 | 2290 | 2293 | 5 |
| 2291 | 2290 | 2292 | 5 |
| 2291 | 2290 | 2293 | 5 |
| 2292 | 2290 | 2293 | 5 |
| 2285 | 2294 | 2295 | 5 |
| 2285 | 2294 | 2296 | 5 |
| 2285 | 2294 | 2297 | 5 |
| 2295 | 2294 | 2296 | 5 |
| 2295 | 2294 | 2297 | 5 |
| 2296 | 2294 | 2297 | 5 |
| 2270 | 2298 | 2299 | 5 |
| 2270 | 2298 | 2300 | 5 |
| 2270 | 2298 | 2303 | 5 |
| 2299 | 2298 | 2300 | 5 |
| 2299 | 2298 | 2303 | 5 |
| 2300 | 2298 | 2303 | 5 |
| 2298 | 2300 | 2301 | 5 |
| 2298 | 2300 | 2302 | 5 |
| 2301 | 2300 | 2302 | 5 |
| 2298 | 2303 | 2304 | 5 |
| 2298 | 2303 | 2305 | 5 |
| 2298 | 2303 | 2306 | 5 |
| 2304 | 2303 | 2305 | 5 |
| 2304 | 2303 | 2306 | 5 |
| 2305 | 2303 | 2306 | 5 |
| 2303 | 2306 | 2307 | 5 |
| 2303 | 2306 | 2308 | 5 |
| 2303 | 2306 | 2333 | 5 |
| 2307 | 2306 | 2308 | 5 |
| 2307 | 2306 | 2333 | 5 |
| 2308 | 2306 | 2333 | 5 |
| 2306 | 2308 | 2309 | 5 |
| 2306 | 2308 | 2310 | 5 |
| 2306 | 2308 | 2311 | 5 |
| 2309 | 2308 | 2310 | 5 |
| 2309 | 2308 | 2311 | 5 |
| 2310 | 2308 | 2311 | 5 |
| 2308 | 2311 | 2312 | 5 |

|      |      |      |   |
|------|------|------|---|
| 2308 | 2311 | 2313 | 5 |
| 2308 | 2311 | 2314 | 5 |
| 2312 | 2311 | 2313 | 5 |
| 2312 | 2311 | 2314 | 5 |
| 2313 | 2311 | 2314 | 5 |
| 2311 | 2314 | 2315 | 5 |
| 2311 | 2314 | 2316 | 5 |
| 2311 | 2314 | 2317 | 5 |
| 2315 | 2314 | 2316 | 5 |
| 2315 | 2314 | 2317 | 5 |
| 2316 | 2314 | 2317 | 5 |
| 2314 | 2317 | 2318 | 5 |
| 2314 | 2317 | 2319 | 5 |
| 2314 | 2317 | 2320 | 5 |
| 2318 | 2317 | 2319 | 5 |
| 2318 | 2317 | 2320 | 5 |
| 2319 | 2317 | 2320 | 5 |
| 2317 | 2320 | 2321 | 5 |
| 2317 | 2320 | 2322 | 5 |
| 2317 | 2320 | 2323 | 5 |
| 2321 | 2320 | 2322 | 5 |
| 2321 | 2320 | 2323 | 5 |
| 2322 | 2320 | 2323 | 5 |
| 2320 | 2323 | 2324 | 5 |
| 2320 | 2323 | 2325 | 5 |
| 2320 | 2323 | 2326 | 5 |
| 2324 | 2323 | 2325 | 5 |
| 2324 | 2323 | 2326 | 5 |
| 2325 | 2323 | 2326 | 5 |
| 2323 | 2326 | 2327 | 5 |
| 2323 | 2326 | 2328 | 5 |
| 2323 | 2326 | 2329 | 5 |
| 2327 | 2326 | 2328 | 5 |
| 2327 | 2326 | 2329 | 5 |
| 2328 | 2326 | 2329 | 5 |
| 2326 | 2329 | 2330 | 5 |
| 2326 | 2329 | 2331 | 5 |
| 2326 | 2329 | 2332 | 5 |
| 2330 | 2329 | 2331 | 5 |
| 2330 | 2329 | 2332 | 5 |
| 2331 | 2329 | 2332 | 5 |
| 2306 | 2333 | 2334 | 5 |
| 2306 | 2333 | 2335 | 5 |
| 2306 | 2333 | 2361 | 5 |
| 2334 | 2333 | 2335 | 5 |
| 2334 | 2333 | 2361 | 5 |
| 2335 | 2333 | 2361 | 5 |
| 2333 | 2335 | 2336 | 5 |
| 2333 | 2335 | 2337 | 5 |
| 2336 | 2335 | 2337 | 5 |
| 2335 | 2337 | 2338 | 5 |
| 2335 | 2337 | 2339 | 5 |
| 2338 | 2337 | 2339 | 5 |
| 2337 | 2339 | 2340 | 5 |

|      |      |      |   |
|------|------|------|---|
| 2337 | 2339 | 2341 | 5 |
| 2337 | 2339 | 2342 | 5 |
| 2340 | 2339 | 2341 | 5 |
| 2340 | 2339 | 2342 | 5 |
| 2341 | 2339 | 2342 | 5 |
| 2339 | 2342 | 2343 | 5 |
| 2339 | 2342 | 2344 | 5 |
| 2339 | 2342 | 2345 | 5 |
| 2343 | 2342 | 2344 | 5 |
| 2343 | 2342 | 2345 | 5 |
| 2344 | 2342 | 2345 | 5 |
| 2342 | 2345 | 2346 | 5 |
| 2342 | 2345 | 2347 | 5 |
| 2342 | 2345 | 2348 | 5 |
| 2346 | 2345 | 2347 | 5 |
| 2346 | 2345 | 2348 | 5 |
| 2347 | 2345 | 2348 | 5 |
| 2345 | 2348 | 2349 | 5 |
| 2345 | 2348 | 2353 | 5 |
| 2345 | 2348 | 2357 | 5 |
| 2349 | 2348 | 2353 | 5 |
| 2349 | 2348 | 2357 | 5 |
| 2353 | 2348 | 2357 | 5 |
| 2348 | 2349 | 2350 | 5 |
| 2348 | 2349 | 2351 | 5 |
| 2348 | 2349 | 2352 | 5 |
| 2350 | 2349 | 2351 | 5 |
| 2350 | 2349 | 2352 | 5 |
| 2351 | 2349 | 2352 | 5 |
| 2348 | 2353 | 2354 | 5 |
| 2348 | 2353 | 2355 | 5 |
| 2348 | 2353 | 2356 | 5 |
| 2354 | 2353 | 2355 | 5 |
| 2354 | 2353 | 2356 | 5 |
| 2355 | 2353 | 2356 | 5 |
| 2348 | 2357 | 2358 | 5 |
| 2348 | 2357 | 2359 | 5 |
| 2348 | 2357 | 2360 | 5 |
| 2358 | 2357 | 2359 | 5 |
| 2358 | 2357 | 2360 | 5 |
| 2359 | 2357 | 2360 | 5 |
| 2333 | 2361 | 2362 | 5 |
| 2333 | 2361 | 2363 | 5 |
| 2333 | 2361 | 2366 | 5 |
| 2362 | 2361 | 2363 | 5 |
| 2362 | 2361 | 2366 | 5 |
| 2363 | 2361 | 2366 | 5 |
| 2361 | 2363 | 2364 | 5 |
| 2361 | 2363 | 2365 | 5 |
| 2364 | 2363 | 2365 | 5 |
| 2361 | 2366 | 2367 | 5 |
| 2361 | 2366 | 2368 | 5 |
| 2361 | 2366 | 2369 | 5 |
| 2367 | 2366 | 2368 | 5 |

|      |      |      |   |
|------|------|------|---|
| 2367 | 2366 | 2369 | 5 |
| 2368 | 2366 | 2369 | 5 |
| 2366 | 2369 | 2370 | 5 |
| 2366 | 2369 | 2371 | 5 |
| 2366 | 2369 | 2396 | 5 |
| 2370 | 2369 | 2371 | 5 |
| 2370 | 2369 | 2396 | 5 |
| 2371 | 2369 | 2396 | 5 |
| 2369 | 2371 | 2372 | 5 |
| 2369 | 2371 | 2373 | 5 |
| 2369 | 2371 | 2374 | 5 |
| 2372 | 2371 | 2373 | 5 |
| 2372 | 2371 | 2374 | 5 |
| 2373 | 2371 | 2374 | 5 |
| 2371 | 2374 | 2375 | 5 |
| 2371 | 2374 | 2376 | 5 |
| 2371 | 2374 | 2377 | 5 |
| 2375 | 2374 | 2376 | 5 |
| 2375 | 2374 | 2377 | 5 |
| 2376 | 2374 | 2377 | 5 |
| 2374 | 2377 | 2378 | 5 |
| 2374 | 2377 | 2379 | 5 |
| 2374 | 2377 | 2380 | 5 |
| 2378 | 2377 | 2379 | 5 |
| 2378 | 2377 | 2380 | 5 |
| 2379 | 2377 | 2380 | 5 |
| 2377 | 2380 | 2381 | 5 |
| 2377 | 2380 | 2382 | 5 |
| 2377 | 2380 | 2383 | 5 |
| 2381 | 2380 | 2382 | 5 |
| 2381 | 2380 | 2383 | 5 |
| 2382 | 2380 | 2383 | 5 |
| 2380 | 2383 | 2384 | 5 |
| 2380 | 2383 | 2385 | 5 |
| 2380 | 2383 | 2386 | 5 |
| 2384 | 2383 | 2385 | 5 |
| 2384 | 2383 | 2386 | 5 |
| 2385 | 2383 | 2386 | 5 |
| 2383 | 2386 | 2387 | 5 |
| 2383 | 2386 | 2388 | 5 |
| 2383 | 2386 | 2389 | 5 |
| 2387 | 2386 | 2388 | 5 |
| 2387 | 2386 | 2389 | 5 |
| 2388 | 2386 | 2389 | 5 |
| 2386 | 2389 | 2390 | 5 |
| 2386 | 2389 | 2391 | 5 |
| 2386 | 2389 | 2392 | 5 |
| 2390 | 2389 | 2391 | 5 |
| 2390 | 2389 | 2392 | 5 |
| 2391 | 2389 | 2392 | 5 |
| 2389 | 2392 | 2393 | 5 |
| 2389 | 2392 | 2394 | 5 |
| 2389 | 2392 | 2395 | 5 |
| 2393 | 2392 | 2394 | 5 |

|      |      |      |   |
|------|------|------|---|
| 2393 | 2392 | 2395 | 5 |
| 2394 | 2392 | 2395 | 5 |
| 2369 | 2396 | 2397 | 5 |
| 2369 | 2396 | 2398 | 5 |
| 2369 | 2396 | 2424 | 5 |
| 2397 | 2396 | 2398 | 5 |
| 2397 | 2396 | 2424 | 5 |
| 2398 | 2396 | 2424 | 5 |
| 2396 | 2398 | 2399 | 5 |
| 2396 | 2398 | 2400 | 5 |
| 2399 | 2398 | 2400 | 5 |
| 2398 | 2400 | 2401 | 5 |
| 2398 | 2400 | 2402 | 5 |
| 2401 | 2400 | 2402 | 5 |
| 2400 | 2402 | 2403 | 5 |
| 2400 | 2402 | 2404 | 5 |
| 2400 | 2402 | 2405 | 5 |
| 2403 | 2402 | 2404 | 5 |
| 2403 | 2402 | 2405 | 5 |
| 2404 | 2402 | 2405 | 5 |
| 2402 | 2405 | 2406 | 5 |
| 2402 | 2405 | 2407 | 5 |
| 2402 | 2405 | 2408 | 5 |
| 2406 | 2405 | 2407 | 5 |
| 2406 | 2405 | 2408 | 5 |
| 2407 | 2405 | 2408 | 5 |
| 2405 | 2408 | 2409 | 5 |
| 2405 | 2408 | 2410 | 5 |
| 2405 | 2408 | 2411 | 5 |
| 2409 | 2408 | 2410 | 5 |
| 2409 | 2408 | 2411 | 5 |
| 2410 | 2408 | 2411 | 5 |
| 2408 | 2411 | 2412 | 5 |
| 2408 | 2411 | 2416 | 5 |
| 2408 | 2411 | 2420 | 5 |
| 2412 | 2411 | 2416 | 5 |
| 2412 | 2411 | 2420 | 5 |
| 2416 | 2411 | 2420 | 5 |
| 2411 | 2412 | 2413 | 5 |
| 2411 | 2412 | 2414 | 5 |
| 2411 | 2412 | 2415 | 5 |
| 2413 | 2412 | 2414 | 5 |
| 2413 | 2412 | 2415 | 5 |
| 2414 | 2412 | 2415 | 5 |
| 2411 | 2416 | 2417 | 5 |
| 2411 | 2416 | 2418 | 5 |
| 2411 | 2416 | 2419 | 5 |
| 2417 | 2416 | 2418 | 5 |
| 2417 | 2416 | 2419 | 5 |
| 2418 | 2416 | 2419 | 5 |
| 2411 | 2420 | 2421 | 5 |
| 2411 | 2420 | 2422 | 5 |
| 2411 | 2420 | 2423 | 5 |
| 2421 | 2420 | 2422 | 5 |



|      |      |      |   |
|------|------|------|---|
| 2421 | 2420 | 2423 | 5 |
| 2422 | 2420 | 2423 | 5 |
| 2396 | 2424 | 2425 | 5 |
| 2396 | 2424 | 2426 | 5 |
| 2396 | 2424 | 2429 | 5 |
| 2425 | 2424 | 2426 | 5 |
| 2425 | 2424 | 2429 | 5 |
| 2426 | 2424 | 2429 | 5 |
| 2424 | 2426 | 2427 | 5 |
| 2424 | 2426 | 2428 | 5 |
| 2427 | 2426 | 2428 | 5 |
| 2424 | 2429 | 2430 | 5 |
| 2424 | 2429 | 2431 | 5 |
| 2424 | 2429 | 2432 | 5 |
| 2430 | 2429 | 2431 | 5 |
| 2430 | 2429 | 2432 | 5 |
| 2431 | 2429 | 2432 | 5 |
| 2429 | 2432 | 2433 | 5 |
| 2429 | 2432 | 2434 | 5 |
| 2429 | 2432 | 2459 | 5 |
| 2433 | 2432 | 2434 | 5 |
| 2433 | 2432 | 2459 | 5 |
| 2434 | 2432 | 2459 | 5 |
| 2432 | 2434 | 2435 | 5 |
| 2432 | 2434 | 2436 | 5 |
| 2432 | 2434 | 2437 | 5 |
| 2435 | 2434 | 2436 | 5 |
| 2435 | 2434 | 2437 | 5 |
| 2436 | 2434 | 2437 | 5 |
| 2434 | 2437 | 2438 | 5 |
| 2434 | 2437 | 2439 | 5 |
| 2434 | 2437 | 2440 | 5 |
| 2438 | 2437 | 2439 | 5 |
| 2438 | 2437 | 2440 | 5 |
| 2439 | 2437 | 2440 | 5 |
| 2437 | 2440 | 2441 | 5 |
| 2437 | 2440 | 2442 | 5 |
| 2437 | 2440 | 2443 | 5 |
| 2441 | 2440 | 2442 | 5 |
| 2441 | 2440 | 2443 | 5 |
| 2442 | 2440 | 2443 | 5 |
| 2440 | 2443 | 2444 | 5 |
| 2440 | 2443 | 2445 | 5 |
| 2440 | 2443 | 2446 | 5 |
| 2444 | 2443 | 2445 | 5 |
| 2444 | 2443 | 2446 | 5 |
| 2445 | 2443 | 2446 | 5 |
| 2443 | 2446 | 2447 | 5 |
| 2443 | 2446 | 2448 | 5 |
| 2443 | 2446 | 2449 | 5 |
| 2447 | 2446 | 2448 | 5 |
| 2447 | 2446 | 2449 | 5 |
| 2448 | 2446 | 2449 | 5 |
| 2446 | 2449 | 2450 | 5 |

|      |      |      |   |
|------|------|------|---|
| 2446 | 2449 | 2451 | 5 |
| 2446 | 2449 | 2452 | 5 |
| 2450 | 2449 | 2451 | 5 |
| 2450 | 2449 | 2452 | 5 |
| 2451 | 2449 | 2452 | 5 |
| 2449 | 2452 | 2453 | 5 |
| 2449 | 2452 | 2454 | 5 |
| 2449 | 2452 | 2455 | 5 |
| 2453 | 2452 | 2454 | 5 |
| 2453 | 2452 | 2455 | 5 |
| 2454 | 2452 | 2455 | 5 |
| 2452 | 2455 | 2456 | 5 |
| 2452 | 2455 | 2457 | 5 |
| 2452 | 2455 | 2458 | 5 |
| 2456 | 2455 | 2457 | 5 |
| 2456 | 2455 | 2458 | 5 |
| 2457 | 2455 | 2458 | 5 |
| 2432 | 2459 | 2460 | 5 |
| 2432 | 2459 | 2461 | 5 |
| 2432 | 2459 | 2487 | 5 |
| 2460 | 2459 | 2461 | 5 |
| 2460 | 2459 | 2487 | 5 |
| 2461 | 2459 | 2487 | 5 |
| 2459 | 2461 | 2462 | 5 |
| 2459 | 2461 | 2463 | 5 |
| 2462 | 2461 | 2463 | 5 |
| 2461 | 2463 | 2464 | 5 |
| 2461 | 2463 | 2465 | 5 |
| 2464 | 2463 | 2465 | 5 |
| 2463 | 2465 | 2466 | 5 |
| 2463 | 2465 | 2467 | 5 |
| 2463 | 2465 | 2468 | 5 |
| 2466 | 2465 | 2467 | 5 |
| 2466 | 2465 | 2468 | 5 |
| 2467 | 2465 | 2468 | 5 |
| 2465 | 2468 | 2469 | 5 |
| 2465 | 2468 | 2470 | 5 |
| 2465 | 2468 | 2471 | 5 |
| 2469 | 2468 | 2470 | 5 |
| 2469 | 2468 | 2471 | 5 |
| 2470 | 2468 | 2471 | 5 |
| 2468 | 2471 | 2472 | 5 |
| 2468 | 2471 | 2473 | 5 |
| 2468 | 2471 | 2474 | 5 |
| 2472 | 2471 | 2473 | 5 |
| 2472 | 2471 | 2474 | 5 |
| 2473 | 2471 | 2474 | 5 |
| 2471 | 2474 | 2475 | 5 |
| 2471 | 2474 | 2479 | 5 |
| 2471 | 2474 | 2483 | 5 |
| 2475 | 2474 | 2479 | 5 |
| 2475 | 2474 | 2483 | 5 |
| 2479 | 2474 | 2483 | 5 |
| 2474 | 2475 | 2476 | 5 |

|      |      |      |   |
|------|------|------|---|
| 2474 | 2475 | 2477 | 5 |
| 2474 | 2475 | 2478 | 5 |
| 2476 | 2475 | 2477 | 5 |
| 2476 | 2475 | 2478 | 5 |
| 2477 | 2475 | 2478 | 5 |
| 2474 | 2479 | 2480 | 5 |
| 2474 | 2479 | 2481 | 5 |
| 2474 | 2479 | 2482 | 5 |
| 2480 | 2479 | 2481 | 5 |
| 2480 | 2479 | 2482 | 5 |
| 2481 | 2479 | 2482 | 5 |
| 2474 | 2483 | 2484 | 5 |
| 2474 | 2483 | 2485 | 5 |
| 2474 | 2483 | 2486 | 5 |
| 2484 | 2483 | 2485 | 5 |
| 2484 | 2483 | 2486 | 5 |
| 2485 | 2483 | 2486 | 5 |
| 2459 | 2487 | 2488 | 5 |
| 2459 | 2487 | 2489 | 5 |
| 2459 | 2487 | 2492 | 5 |
| 2488 | 2487 | 2489 | 5 |
| 2488 | 2487 | 2492 | 5 |
| 2489 | 2487 | 2492 | 5 |
| 2487 | 2489 | 2490 | 5 |
| 2487 | 2489 | 2491 | 5 |
| 2490 | 2489 | 2491 | 5 |
| 2487 | 2492 | 2493 | 5 |
| 2487 | 2492 | 2494 | 5 |
| 2487 | 2492 | 2495 | 5 |
| 2493 | 2492 | 2494 | 5 |
| 2493 | 2492 | 2495 | 5 |
| 2494 | 2492 | 2495 | 5 |
| 2492 | 2495 | 2496 | 5 |
| 2492 | 2495 | 2497 | 5 |
| 2492 | 2495 | 2522 | 5 |
| 2496 | 2495 | 2497 | 5 |
| 2496 | 2495 | 2522 | 5 |
| 2497 | 2495 | 2522 | 5 |
| 2495 | 2497 | 2498 | 5 |
| 2495 | 2497 | 2499 | 5 |
| 2495 | 2497 | 2500 | 5 |
| 2498 | 2497 | 2499 | 5 |
| 2498 | 2497 | 2500 | 5 |
| 2499 | 2497 | 2500 | 5 |
| 2497 | 2500 | 2501 | 5 |
| 2497 | 2500 | 2502 | 5 |
| 2497 | 2500 | 2503 | 5 |
| 2501 | 2500 | 2502 | 5 |
| 2501 | 2500 | 2503 | 5 |
| 2502 | 2500 | 2503 | 5 |
| 2500 | 2503 | 2504 | 5 |
| 2500 | 2503 | 2505 | 5 |
| 2500 | 2503 | 2506 | 5 |
| 2504 | 2503 | 2505 | 5 |

|      |      |      |   |
|------|------|------|---|
| 2504 | 2503 | 2506 | 5 |
| 2505 | 2503 | 2506 | 5 |
| 2503 | 2506 | 2507 | 5 |
| 2503 | 2506 | 2508 | 5 |
| 2503 | 2506 | 2509 | 5 |
| 2507 | 2506 | 2508 | 5 |
| 2507 | 2506 | 2509 | 5 |
| 2508 | 2506 | 2509 | 5 |
| 2506 | 2509 | 2510 | 5 |
| 2506 | 2509 | 2511 | 5 |
| 2506 | 2509 | 2512 | 5 |
| 2510 | 2509 | 2511 | 5 |
| 2510 | 2509 | 2512 | 5 |
| 2511 | 2509 | 2512 | 5 |
| 2509 | 2512 | 2513 | 5 |
| 2509 | 2512 | 2514 | 5 |
| 2509 | 2512 | 2515 | 5 |
| 2513 | 2512 | 2514 | 5 |
| 2513 | 2512 | 2515 | 5 |
| 2514 | 2512 | 2515 | 5 |
| 2512 | 2515 | 2516 | 5 |
| 2512 | 2515 | 2517 | 5 |
| 2512 | 2515 | 2518 | 5 |
| 2516 | 2515 | 2517 | 5 |
| 2516 | 2515 | 2518 | 5 |
| 2517 | 2515 | 2518 | 5 |
| 2515 | 2518 | 2519 | 5 |
| 2515 | 2518 | 2520 | 5 |
| 2515 | 2518 | 2521 | 5 |
| 2519 | 2518 | 2520 | 5 |
| 2519 | 2518 | 2521 | 5 |
| 2520 | 2518 | 2521 | 5 |
| 2495 | 2522 | 2523 | 5 |
| 2495 | 2522 | 2524 | 5 |
| 2495 | 2522 | 2550 | 5 |
| 2523 | 2522 | 2524 | 5 |
| 2523 | 2522 | 2550 | 5 |
| 2524 | 2522 | 2550 | 5 |
| 2522 | 2524 | 2525 | 5 |
| 2522 | 2524 | 2526 | 5 |
| 2525 | 2524 | 2526 | 5 |
| 2524 | 2526 | 2527 | 5 |
| 2524 | 2526 | 2528 | 5 |
| 2527 | 2526 | 2528 | 5 |
| 2526 | 2528 | 2529 | 5 |
| 2526 | 2528 | 2530 | 5 |
| 2526 | 2528 | 2531 | 5 |
| 2529 | 2528 | 2530 | 5 |
| 2529 | 2528 | 2531 | 5 |
| 2530 | 2528 | 2531 | 5 |
| 2528 | 2531 | 2532 | 5 |
| 2528 | 2531 | 2533 | 5 |
| 2528 | 2531 | 2534 | 5 |
| 2532 | 2531 | 2533 | 5 |

|      |      |      |   |
|------|------|------|---|
| 2532 | 2531 | 2534 | 5 |
| 2533 | 2531 | 2534 | 5 |
| 2531 | 2534 | 2535 | 5 |
| 2531 | 2534 | 2536 | 5 |
| 2531 | 2534 | 2537 | 5 |
| 2535 | 2534 | 2536 | 5 |
| 2535 | 2534 | 2537 | 5 |
| 2536 | 2534 | 2537 | 5 |
| 2534 | 2537 | 2538 | 5 |
| 2534 | 2537 | 2542 | 5 |
| 2534 | 2537 | 2546 | 5 |
| 2538 | 2537 | 2542 | 5 |
| 2538 | 2537 | 2546 | 5 |
| 2542 | 2537 | 2546 | 5 |
| 2537 | 2538 | 2539 | 5 |
| 2537 | 2538 | 2540 | 5 |
| 2537 | 2538 | 2541 | 5 |
| 2539 | 2538 | 2540 | 5 |
| 2539 | 2538 | 2541 | 5 |
| 2540 | 2538 | 2541 | 5 |
| 2537 | 2542 | 2543 | 5 |
| 2537 | 2542 | 2544 | 5 |
| 2537 | 2542 | 2545 | 5 |
| 2543 | 2542 | 2544 | 5 |
| 2543 | 2542 | 2545 | 5 |
| 2544 | 2542 | 2545 | 5 |
| 2537 | 2546 | 2547 | 5 |
| 2537 | 2546 | 2548 | 5 |
| 2537 | 2546 | 2549 | 5 |
| 2547 | 2546 | 2548 | 5 |
| 2547 | 2546 | 2549 | 5 |
| 2548 | 2546 | 2549 | 5 |
| 2522 | 2550 | 2551 | 5 |
| 2522 | 2550 | 2552 | 5 |
| 2522 | 2550 | 2555 | 5 |
| 2551 | 2550 | 2552 | 5 |
| 2551 | 2550 | 2555 | 5 |
| 2552 | 2550 | 2555 | 5 |
| 2550 | 2552 | 2553 | 5 |
| 2550 | 2552 | 2554 | 5 |
| 2553 | 2552 | 2554 | 5 |
| 2550 | 2555 | 2556 | 5 |
| 2550 | 2555 | 2557 | 5 |
| 2550 | 2555 | 2558 | 5 |
| 2556 | 2555 | 2557 | 5 |
| 2556 | 2555 | 2558 | 5 |
| 2557 | 2555 | 2558 | 5 |
| 2555 | 2558 | 2559 | 5 |
| 2555 | 2558 | 2560 | 5 |
| 2555 | 2558 | 2585 | 5 |
| 2559 | 2558 | 2560 | 5 |
| 2559 | 2558 | 2585 | 5 |
| 2560 | 2558 | 2585 | 5 |
| 2558 | 2560 | 2561 | 5 |

|      |      |      |   |
|------|------|------|---|
| 2558 | 2560 | 2562 | 5 |
| 2558 | 2560 | 2563 | 5 |
| 2561 | 2560 | 2562 | 5 |
| 2561 | 2560 | 2563 | 5 |
| 2562 | 2560 | 2563 | 5 |
| 2560 | 2563 | 2564 | 5 |
| 2560 | 2563 | 2565 | 5 |
| 2560 | 2563 | 2566 | 5 |
| 2564 | 2563 | 2565 | 5 |
| 2564 | 2563 | 2566 | 5 |
| 2565 | 2563 | 2566 | 5 |
| 2563 | 2566 | 2567 | 5 |
| 2563 | 2566 | 2568 | 5 |
| 2563 | 2566 | 2569 | 5 |
| 2567 | 2566 | 2568 | 5 |
| 2567 | 2566 | 2569 | 5 |
| 2568 | 2566 | 2569 | 5 |
| 2566 | 2569 | 2570 | 5 |
| 2566 | 2569 | 2571 | 5 |
| 2566 | 2569 | 2572 | 5 |
| 2570 | 2569 | 2571 | 5 |
| 2570 | 2569 | 2572 | 5 |
| 2571 | 2569 | 2572 | 5 |
| 2569 | 2572 | 2573 | 5 |
| 2569 | 2572 | 2574 | 5 |
| 2569 | 2572 | 2575 | 5 |
| 2573 | 2572 | 2574 | 5 |
| 2573 | 2572 | 2575 | 5 |
| 2574 | 2572 | 2575 | 5 |
| 2572 | 2575 | 2576 | 5 |
| 2572 | 2575 | 2577 | 5 |
| 2572 | 2575 | 2578 | 5 |
| 2576 | 2575 | 2577 | 5 |
| 2576 | 2575 | 2578 | 5 |
| 2577 | 2575 | 2578 | 5 |
| 2575 | 2578 | 2579 | 5 |
| 2575 | 2578 | 2580 | 5 |
| 2575 | 2578 | 2581 | 5 |
| 2579 | 2578 | 2580 | 5 |
| 2579 | 2578 | 2581 | 5 |
| 2580 | 2578 | 2581 | 5 |
| 2578 | 2581 | 2582 | 5 |
| 2578 | 2581 | 2583 | 5 |
| 2578 | 2581 | 2584 | 5 |
| 2582 | 2581 | 2583 | 5 |
| 2582 | 2581 | 2584 | 5 |
| 2583 | 2581 | 2584 | 5 |
| 2558 | 2585 | 2586 | 5 |
| 2558 | 2585 | 2587 | 5 |
| 2558 | 2585 | 2613 | 5 |
| 2586 | 2585 | 2587 | 5 |
| 2586 | 2585 | 2613 | 5 |
| 2587 | 2585 | 2613 | 5 |
| 2585 | 2587 | 2588 | 5 |

|      |      |      |   |
|------|------|------|---|
| 2585 | 2587 | 2589 | 5 |
| 2588 | 2587 | 2589 | 5 |
| 2587 | 2589 | 2590 | 5 |
| 2587 | 2589 | 2591 | 5 |
| 2590 | 2589 | 2591 | 5 |
| 2589 | 2591 | 2592 | 5 |
| 2589 | 2591 | 2593 | 5 |
| 2589 | 2591 | 2594 | 5 |
| 2592 | 2591 | 2593 | 5 |
| 2592 | 2591 | 2594 | 5 |
| 2593 | 2591 | 2594 | 5 |
| 2591 | 2594 | 2595 | 5 |
| 2591 | 2594 | 2596 | 5 |
| 2591 | 2594 | 2597 | 5 |
| 2595 | 2594 | 2596 | 5 |
| 2595 | 2594 | 2597 | 5 |
| 2596 | 2594 | 2597 | 5 |
| 2594 | 2597 | 2598 | 5 |
| 2594 | 2597 | 2599 | 5 |
| 2594 | 2597 | 2600 | 5 |
| 2598 | 2597 | 2599 | 5 |
| 2598 | 2597 | 2600 | 5 |
| 2599 | 2597 | 2600 | 5 |
| 2597 | 2600 | 2601 | 5 |
| 2597 | 2600 | 2605 | 5 |
| 2597 | 2600 | 2609 | 5 |
| 2601 | 2600 | 2605 | 5 |
| 2601 | 2600 | 2609 | 5 |
| 2605 | 2600 | 2609 | 5 |
| 2600 | 2601 | 2602 | 5 |
| 2600 | 2601 | 2603 | 5 |
| 2600 | 2601 | 2604 | 5 |
| 2602 | 2601 | 2603 | 5 |
| 2602 | 2601 | 2604 | 5 |
| 2603 | 2601 | 2604 | 5 |
| 2600 | 2605 | 2606 | 5 |
| 2600 | 2605 | 2607 | 5 |
| 2600 | 2605 | 2608 | 5 |
| 2606 | 2605 | 2607 | 5 |
| 2606 | 2605 | 2608 | 5 |
| 2607 | 2605 | 2608 | 5 |
| 2600 | 2609 | 2610 | 5 |
| 2600 | 2609 | 2611 | 5 |
| 2600 | 2609 | 2612 | 5 |
| 2610 | 2609 | 2611 | 5 |
| 2610 | 2609 | 2612 | 5 |
| 2611 | 2609 | 2612 | 5 |
| 2585 | 2613 | 2614 | 5 |
| 2585 | 2613 | 2615 | 5 |
| 2585 | 2613 | 2618 | 5 |
| 2614 | 2613 | 2615 | 5 |
| 2614 | 2613 | 2618 | 5 |
| 2615 | 2613 | 2618 | 5 |
| 2613 | 2615 | 2616 | 5 |

|      |      |      |   |
|------|------|------|---|
| 2613 | 2615 | 2617 | 5 |
| 2616 | 2615 | 2617 | 5 |
| 2613 | 2618 | 2619 | 5 |
| 2613 | 2618 | 2620 | 5 |
| 2613 | 2618 | 2621 | 5 |
| 2619 | 2618 | 2620 | 5 |
| 2619 | 2618 | 2621 | 5 |
| 2620 | 2618 | 2621 | 5 |
| 2618 | 2621 | 2622 | 5 |
| 2618 | 2621 | 2623 | 5 |
| 2618 | 2621 | 2648 | 5 |
| 2622 | 2621 | 2623 | 5 |
| 2622 | 2621 | 2648 | 5 |
| 2623 | 2621 | 2648 | 5 |
| 2621 | 2623 | 2624 | 5 |
| 2621 | 2623 | 2625 | 5 |
| 2621 | 2623 | 2626 | 5 |
| 2624 | 2623 | 2625 | 5 |
| 2624 | 2623 | 2626 | 5 |
| 2625 | 2623 | 2626 | 5 |
| 2623 | 2626 | 2627 | 5 |
| 2623 | 2626 | 2628 | 5 |
| 2623 | 2626 | 2629 | 5 |
| 2627 | 2626 | 2628 | 5 |
| 2627 | 2626 | 2629 | 5 |
| 2628 | 2626 | 2629 | 5 |
| 2626 | 2629 | 2630 | 5 |
| 2626 | 2629 | 2631 | 5 |
| 2626 | 2629 | 2632 | 5 |
| 2630 | 2629 | 2631 | 5 |
| 2630 | 2629 | 2632 | 5 |
| 2631 | 2629 | 2632 | 5 |
| 2629 | 2632 | 2633 | 5 |
| 2629 | 2632 | 2634 | 5 |
| 2629 | 2632 | 2635 | 5 |
| 2633 | 2632 | 2634 | 5 |
| 2633 | 2632 | 2635 | 5 |
| 2634 | 2632 | 2635 | 5 |
| 2632 | 2635 | 2636 | 5 |
| 2632 | 2635 | 2637 | 5 |
| 2632 | 2635 | 2638 | 5 |
| 2636 | 2635 | 2637 | 5 |
| 2636 | 2635 | 2638 | 5 |
| 2637 | 2635 | 2638 | 5 |
| 2635 | 2638 | 2639 | 5 |
| 2635 | 2638 | 2640 | 5 |
| 2635 | 2638 | 2641 | 5 |
| 2639 | 2638 | 2640 | 5 |
| 2639 | 2638 | 2641 | 5 |
| 2640 | 2638 | 2641 | 5 |
| 2638 | 2641 | 2642 | 5 |
| 2638 | 2641 | 2643 | 5 |
| 2638 | 2641 | 2644 | 5 |
| 2642 | 2641 | 2643 | 5 |



|      |      |      |   |
|------|------|------|---|
| 2642 | 2641 | 2644 | 5 |
| 2643 | 2641 | 2644 | 5 |
| 2641 | 2644 | 2645 | 5 |
| 2641 | 2644 | 2646 | 5 |
| 2641 | 2644 | 2647 | 5 |
| 2645 | 2644 | 2646 | 5 |
| 2645 | 2644 | 2647 | 5 |
| 2646 | 2644 | 2647 | 5 |
| 2621 | 2648 | 2649 | 5 |
| 2621 | 2648 | 2650 | 5 |
| 2621 | 2648 | 2676 | 5 |
| 2649 | 2648 | 2650 | 5 |
| 2649 | 2648 | 2676 | 5 |
| 2650 | 2648 | 2676 | 5 |
| 2648 | 2650 | 2651 | 5 |
| 2648 | 2650 | 2652 | 5 |
| 2651 | 2650 | 2652 | 5 |
| 2650 | 2652 | 2653 | 5 |
| 2650 | 2652 | 2654 | 5 |
| 2653 | 2652 | 2654 | 5 |
| 2652 | 2654 | 2655 | 5 |
| 2652 | 2654 | 2656 | 5 |
| 2652 | 2654 | 2657 | 5 |
| 2655 | 2654 | 2656 | 5 |
| 2655 | 2654 | 2657 | 5 |
| 2656 | 2654 | 2657 | 5 |
| 2654 | 2657 | 2658 | 5 |
| 2654 | 2657 | 2659 | 5 |
| 2654 | 2657 | 2660 | 5 |
| 2658 | 2657 | 2659 | 5 |
| 2658 | 2657 | 2660 | 5 |
| 2659 | 2657 | 2660 | 5 |
| 2657 | 2660 | 2661 | 5 |
| 2657 | 2660 | 2662 | 5 |
| 2657 | 2660 | 2663 | 5 |
| 2661 | 2660 | 2662 | 5 |
| 2661 | 2660 | 2663 | 5 |
| 2662 | 2660 | 2663 | 5 |
| 2660 | 2663 | 2664 | 5 |
| 2660 | 2663 | 2668 | 5 |
| 2660 | 2663 | 2672 | 5 |
| 2664 | 2663 | 2668 | 5 |
| 2664 | 2663 | 2672 | 5 |
| 2668 | 2663 | 2672 | 5 |
| 2663 | 2664 | 2665 | 5 |
| 2663 | 2664 | 2666 | 5 |
| 2663 | 2664 | 2667 | 5 |
| 2665 | 2664 | 2666 | 5 |
| 2665 | 2664 | 2667 | 5 |
| 2666 | 2664 | 2667 | 5 |
| 2663 | 2668 | 2669 | 5 |
| 2663 | 2668 | 2670 | 5 |
| 2663 | 2668 | 2671 | 5 |
| 2669 | 2668 | 2670 | 5 |

|      |      |      |   |
|------|------|------|---|
| 2669 | 2668 | 2671 | 5 |
| 2670 | 2668 | 2671 | 5 |
| 2663 | 2672 | 2673 | 5 |
| 2663 | 2672 | 2674 | 5 |
| 2663 | 2672 | 2675 | 5 |
| 2673 | 2672 | 2674 | 5 |
| 2673 | 2672 | 2675 | 5 |
| 2674 | 2672 | 2675 | 5 |
| 2648 | 2676 | 2677 | 5 |
| 2648 | 2676 | 2678 | 5 |
| 2648 | 2676 | 2681 | 5 |
| 2677 | 2676 | 2678 | 5 |
| 2677 | 2676 | 2681 | 5 |
| 2678 | 2676 | 2681 | 5 |
| 2676 | 2678 | 2679 | 5 |
| 2676 | 2678 | 2680 | 5 |
| 2679 | 2678 | 2680 | 5 |
| 2676 | 2681 | 2682 | 5 |
| 2676 | 2681 | 2683 | 5 |
| 2676 | 2681 | 2684 | 5 |
| 2682 | 2681 | 2683 | 5 |
| 2682 | 2681 | 2684 | 5 |
| 2683 | 2681 | 2684 | 5 |
| 2681 | 2684 | 2685 | 5 |
| 2681 | 2684 | 2686 | 5 |
| 2681 | 2684 | 2711 | 5 |
| 2685 | 2684 | 2686 | 5 |
| 2685 | 2684 | 2711 | 5 |
| 2686 | 2684 | 2711 | 5 |
| 2684 | 2686 | 2687 | 5 |
| 2684 | 2686 | 2688 | 5 |
| 2684 | 2686 | 2689 | 5 |
| 2687 | 2686 | 2688 | 5 |
| 2687 | 2686 | 2689 | 5 |
| 2688 | 2686 | 2689 | 5 |
| 2686 | 2689 | 2690 | 5 |
| 2686 | 2689 | 2691 | 5 |
| 2686 | 2689 | 2692 | 5 |
| 2690 | 2689 | 2691 | 5 |
| 2690 | 2689 | 2692 | 5 |
| 2691 | 2689 | 2692 | 5 |
| 2689 | 2692 | 2693 | 5 |
| 2689 | 2692 | 2694 | 5 |
| 2689 | 2692 | 2695 | 5 |
| 2693 | 2692 | 2694 | 5 |
| 2693 | 2692 | 2695 | 5 |
| 2694 | 2692 | 2695 | 5 |
| 2692 | 2695 | 2696 | 5 |
| 2692 | 2695 | 2697 | 5 |
| 2692 | 2695 | 2698 | 5 |
| 2696 | 2695 | 2697 | 5 |
| 2696 | 2695 | 2698 | 5 |
| 2697 | 2695 | 2698 | 5 |
| 2695 | 2698 | 2699 | 5 |

|      |      |      |   |
|------|------|------|---|
| 2695 | 2698 | 2700 | 5 |
| 2695 | 2698 | 2701 | 5 |
| 2699 | 2698 | 2700 | 5 |
| 2699 | 2698 | 2701 | 5 |
| 2700 | 2698 | 2701 | 5 |
| 2698 | 2701 | 2702 | 5 |
| 2698 | 2701 | 2703 | 5 |
| 2698 | 2701 | 2704 | 5 |
| 2702 | 2701 | 2703 | 5 |
| 2702 | 2701 | 2704 | 5 |
| 2703 | 2701 | 2704 | 5 |
| 2701 | 2704 | 2705 | 5 |
| 2701 | 2704 | 2706 | 5 |
| 2701 | 2704 | 2707 | 5 |
| 2705 | 2704 | 2706 | 5 |
| 2705 | 2704 | 2707 | 5 |
| 2706 | 2704 | 2707 | 5 |
| 2704 | 2707 | 2708 | 5 |
| 2704 | 2707 | 2709 | 5 |
| 2704 | 2707 | 2710 | 5 |
| 2708 | 2707 | 2709 | 5 |
| 2708 | 2707 | 2710 | 5 |
| 2709 | 2707 | 2710 | 5 |
| 2684 | 2711 | 2712 | 5 |
| 2684 | 2711 | 2713 | 5 |
| 2684 | 2711 | 2739 | 5 |
| 2712 | 2711 | 2713 | 5 |
| 2712 | 2711 | 2739 | 5 |
| 2713 | 2711 | 2739 | 5 |
| 2711 | 2713 | 2714 | 5 |
| 2711 | 2713 | 2715 | 5 |
| 2714 | 2713 | 2715 | 5 |
| 2713 | 2715 | 2716 | 5 |
| 2713 | 2715 | 2717 | 5 |
| 2716 | 2715 | 2717 | 5 |
| 2715 | 2717 | 2718 | 5 |
| 2715 | 2717 | 2719 | 5 |
| 2715 | 2717 | 2720 | 5 |
| 2718 | 2717 | 2719 | 5 |
| 2718 | 2717 | 2720 | 5 |
| 2719 | 2717 | 2720 | 5 |
| 2717 | 2720 | 2721 | 5 |
| 2717 | 2720 | 2722 | 5 |
| 2717 | 2720 | 2723 | 5 |
| 2721 | 2720 | 2722 | 5 |
| 2721 | 2720 | 2723 | 5 |
| 2722 | 2720 | 2723 | 5 |
| 2720 | 2723 | 2724 | 5 |
| 2720 | 2723 | 2725 | 5 |
| 2720 | 2723 | 2726 | 5 |
| 2724 | 2723 | 2725 | 5 |
| 2724 | 2723 | 2726 | 5 |
| 2725 | 2723 | 2726 | 5 |
| 2723 | 2726 | 2727 | 5 |

|      |      |      |   |
|------|------|------|---|
| 2723 | 2726 | 2731 | 5 |
| 2723 | 2726 | 2735 | 5 |
| 2727 | 2726 | 2731 | 5 |
| 2727 | 2726 | 2735 | 5 |
| 2731 | 2726 | 2735 | 5 |
| 2726 | 2727 | 2728 | 5 |
| 2726 | 2727 | 2729 | 5 |
| 2726 | 2727 | 2730 | 5 |
| 2728 | 2727 | 2729 | 5 |
| 2728 | 2727 | 2730 | 5 |
| 2729 | 2727 | 2730 | 5 |
| 2726 | 2731 | 2732 | 5 |
| 2726 | 2731 | 2733 | 5 |
| 2726 | 2731 | 2734 | 5 |
| 2732 | 2731 | 2733 | 5 |
| 2732 | 2731 | 2734 | 5 |
| 2733 | 2731 | 2734 | 5 |
| 2726 | 2735 | 2736 | 5 |
| 2726 | 2735 | 2737 | 5 |
| 2726 | 2735 | 2738 | 5 |
| 2736 | 2735 | 2737 | 5 |
| 2736 | 2735 | 2738 | 5 |
| 2737 | 2735 | 2738 | 5 |
| 2711 | 2739 | 2740 | 5 |
| 2711 | 2739 | 2741 | 5 |
| 2711 | 2739 | 2744 | 5 |
| 2740 | 2739 | 2741 | 5 |
| 2740 | 2739 | 2744 | 5 |
| 2741 | 2739 | 2744 | 5 |
| 2739 | 2741 | 2742 | 5 |
| 2739 | 2741 | 2743 | 5 |
| 2742 | 2741 | 2743 | 5 |
| 2739 | 2744 | 2745 | 5 |
| 2739 | 2744 | 2746 | 5 |
| 2739 | 2744 | 2747 | 5 |
| 2745 | 2744 | 2746 | 5 |
| 2745 | 2744 | 2747 | 5 |
| 2746 | 2744 | 2747 | 5 |
| 2744 | 2747 | 2748 | 5 |
| 2744 | 2747 | 2749 | 5 |
| 2744 | 2747 | 2774 | 5 |
| 2748 | 2747 | 2749 | 5 |
| 2748 | 2747 | 2774 | 5 |
| 2749 | 2747 | 2774 | 5 |
| 2747 | 2749 | 2750 | 5 |
| 2747 | 2749 | 2751 | 5 |
| 2747 | 2749 | 2752 | 5 |
| 2750 | 2749 | 2751 | 5 |
| 2750 | 2749 | 2752 | 5 |
| 2751 | 2749 | 2752 | 5 |
| 2749 | 2752 | 2753 | 5 |
| 2749 | 2752 | 2754 | 5 |
| 2749 | 2752 | 2755 | 5 |
| 2753 | 2752 | 2754 | 5 |

|      |      |      |   |
|------|------|------|---|
| 2753 | 2752 | 2755 | 5 |
| 2754 | 2752 | 2755 | 5 |
| 2752 | 2755 | 2756 | 5 |
| 2752 | 2755 | 2757 | 5 |
| 2752 | 2755 | 2758 | 5 |
| 2756 | 2755 | 2757 | 5 |
| 2756 | 2755 | 2758 | 5 |
| 2757 | 2755 | 2758 | 5 |
| 2755 | 2758 | 2759 | 5 |
| 2755 | 2758 | 2760 | 5 |
| 2755 | 2758 | 2761 | 5 |
| 2759 | 2758 | 2760 | 5 |
| 2759 | 2758 | 2761 | 5 |
| 2760 | 2758 | 2761 | 5 |
| 2758 | 2761 | 2762 | 5 |
| 2758 | 2761 | 2763 | 5 |
| 2758 | 2761 | 2764 | 5 |
| 2762 | 2761 | 2763 | 5 |
| 2762 | 2761 | 2764 | 5 |
| 2763 | 2761 | 2764 | 5 |
| 2761 | 2764 | 2765 | 5 |
| 2761 | 2764 | 2766 | 5 |
| 2761 | 2764 | 2767 | 5 |
| 2765 | 2764 | 2766 | 5 |
| 2765 | 2764 | 2767 | 5 |
| 2766 | 2764 | 2767 | 5 |
| 2764 | 2767 | 2768 | 5 |
| 2764 | 2767 | 2769 | 5 |
| 2764 | 2767 | 2770 | 5 |
| 2768 | 2767 | 2769 | 5 |
| 2768 | 2767 | 2770 | 5 |
| 2769 | 2767 | 2770 | 5 |
| 2767 | 2770 | 2771 | 5 |
| 2767 | 2770 | 2772 | 5 |
| 2767 | 2770 | 2773 | 5 |
| 2771 | 2770 | 2772 | 5 |
| 2771 | 2770 | 2773 | 5 |
| 2772 | 2770 | 2773 | 5 |
| 2747 | 2774 | 2775 | 5 |
| 2747 | 2774 | 2776 | 5 |
| 2747 | 2774 | 2802 | 5 |
| 2775 | 2774 | 2776 | 5 |
| 2775 | 2774 | 2802 | 5 |
| 2776 | 2774 | 2802 | 5 |
| 2774 | 2776 | 2777 | 5 |
| 2774 | 2776 | 2778 | 5 |
| 2777 | 2776 | 2778 | 5 |
| 2776 | 2778 | 2779 | 5 |
| 2776 | 2778 | 2780 | 5 |
| 2779 | 2778 | 2780 | 5 |
| 2778 | 2780 | 2781 | 5 |
| 2778 | 2780 | 2782 | 5 |
| 2778 | 2780 | 2783 | 5 |
| 2781 | 2780 | 2782 | 5 |

|      |      |      |   |
|------|------|------|---|
| 2781 | 2780 | 2783 | 5 |
| 2782 | 2780 | 2783 | 5 |
| 2780 | 2783 | 2784 | 5 |
| 2780 | 2783 | 2785 | 5 |
| 2780 | 2783 | 2786 | 5 |
| 2784 | 2783 | 2785 | 5 |
| 2784 | 2783 | 2786 | 5 |
| 2785 | 2783 | 2786 | 5 |
| 2783 | 2786 | 2787 | 5 |
| 2783 | 2786 | 2788 | 5 |
| 2783 | 2786 | 2789 | 5 |
| 2787 | 2786 | 2788 | 5 |
| 2787 | 2786 | 2789 | 5 |
| 2788 | 2786 | 2789 | 5 |
| 2786 | 2789 | 2790 | 5 |
| 2786 | 2789 | 2794 | 5 |
| 2786 | 2789 | 2798 | 5 |
| 2790 | 2789 | 2794 | 5 |
| 2790 | 2789 | 2798 | 5 |
| 2794 | 2789 | 2798 | 5 |
| 2789 | 2790 | 2791 | 5 |
| 2789 | 2790 | 2792 | 5 |
| 2789 | 2790 | 2793 | 5 |
| 2791 | 2790 | 2792 | 5 |
| 2791 | 2790 | 2793 | 5 |
| 2792 | 2790 | 2793 | 5 |
| 2789 | 2794 | 2795 | 5 |
| 2789 | 2794 | 2796 | 5 |
| 2789 | 2794 | 2797 | 5 |
| 2795 | 2794 | 2796 | 5 |
| 2795 | 2794 | 2797 | 5 |
| 2796 | 2794 | 2797 | 5 |
| 2789 | 2798 | 2799 | 5 |
| 2789 | 2798 | 2800 | 5 |
| 2789 | 2798 | 2801 | 5 |
| 2799 | 2798 | 2800 | 5 |
| 2799 | 2798 | 2801 | 5 |
| 2800 | 2798 | 2801 | 5 |
| 2774 | 2802 | 2803 | 5 |
| 2774 | 2802 | 2804 | 5 |
| 2774 | 2802 | 2807 | 5 |
| 2803 | 2802 | 2804 | 5 |
| 2803 | 2802 | 2807 | 5 |
| 2804 | 2802 | 2807 | 5 |
| 2802 | 2804 | 2805 | 5 |
| 2802 | 2804 | 2806 | 5 |
| 2805 | 2804 | 2806 | 5 |
| 2802 | 2807 | 2808 | 5 |
| 2802 | 2807 | 2809 | 5 |
| 2802 | 2807 | 2810 | 5 |
| 2808 | 2807 | 2809 | 5 |
| 2808 | 2807 | 2810 | 5 |
| 2809 | 2807 | 2810 | 5 |
| 2807 | 2810 | 2811 | 5 |

|      |      |      |   |
|------|------|------|---|
| 2807 | 2810 | 2812 | 5 |
| 2807 | 2810 | 2837 | 5 |
| 2811 | 2810 | 2812 | 5 |
| 2811 | 2810 | 2837 | 5 |
| 2812 | 2810 | 2837 | 5 |
| 2810 | 2812 | 2813 | 5 |
| 2810 | 2812 | 2814 | 5 |
| 2810 | 2812 | 2815 | 5 |
| 2813 | 2812 | 2814 | 5 |
| 2813 | 2812 | 2815 | 5 |
| 2814 | 2812 | 2815 | 5 |
| 2812 | 2815 | 2816 | 5 |
| 2812 | 2815 | 2817 | 5 |
| 2812 | 2815 | 2818 | 5 |
| 2816 | 2815 | 2817 | 5 |
| 2816 | 2815 | 2818 | 5 |
| 2817 | 2815 | 2818 | 5 |
| 2815 | 2818 | 2819 | 5 |
| 2815 | 2818 | 2820 | 5 |
| 2815 | 2818 | 2821 | 5 |
| 2819 | 2818 | 2820 | 5 |
| 2819 | 2818 | 2821 | 5 |
| 2820 | 2818 | 2821 | 5 |
| 2818 | 2821 | 2822 | 5 |
| 2818 | 2821 | 2823 | 5 |
| 2818 | 2821 | 2824 | 5 |
| 2822 | 2821 | 2823 | 5 |
| 2822 | 2821 | 2824 | 5 |
| 2823 | 2821 | 2824 | 5 |
| 2821 | 2824 | 2825 | 5 |
| 2821 | 2824 | 2826 | 5 |
| 2821 | 2824 | 2827 | 5 |
| 2825 | 2824 | 2826 | 5 |
| 2825 | 2824 | 2827 | 5 |
| 2826 | 2824 | 2827 | 5 |
| 2824 | 2827 | 2828 | 5 |
| 2824 | 2827 | 2829 | 5 |
| 2824 | 2827 | 2830 | 5 |
| 2828 | 2827 | 2829 | 5 |
| 2828 | 2827 | 2830 | 5 |
| 2829 | 2827 | 2830 | 5 |
| 2827 | 2830 | 2831 | 5 |
| 2827 | 2830 | 2832 | 5 |
| 2827 | 2830 | 2833 | 5 |
| 2831 | 2830 | 2832 | 5 |
| 2831 | 2830 | 2833 | 5 |
| 2832 | 2830 | 2833 | 5 |
| 2830 | 2833 | 2834 | 5 |
| 2830 | 2833 | 2835 | 5 |
| 2830 | 2833 | 2836 | 5 |
| 2834 | 2833 | 2835 | 5 |
| 2834 | 2833 | 2836 | 5 |
| 2835 | 2833 | 2836 | 5 |
| 2810 | 2837 | 2838 | 5 |

|      |      |      |   |
|------|------|------|---|
| 2810 | 2837 | 2839 | 5 |
| 2810 | 2837 | 2865 | 5 |
| 2838 | 2837 | 2839 | 5 |
| 2838 | 2837 | 2865 | 5 |
| 2839 | 2837 | 2865 | 5 |
| 2837 | 2839 | 2840 | 5 |
| 2837 | 2839 | 2841 | 5 |
| 2840 | 2839 | 2841 | 5 |
| 2839 | 2841 | 2842 | 5 |
| 2839 | 2841 | 2843 | 5 |
| 2842 | 2841 | 2843 | 5 |
| 2841 | 2843 | 2844 | 5 |
| 2841 | 2843 | 2845 | 5 |
| 2841 | 2843 | 2846 | 5 |
| 2844 | 2843 | 2845 | 5 |
| 2844 | 2843 | 2846 | 5 |
| 2845 | 2843 | 2846 | 5 |
| 2843 | 2846 | 2847 | 5 |
| 2843 | 2846 | 2848 | 5 |
| 2843 | 2846 | 2849 | 5 |
| 2847 | 2846 | 2848 | 5 |
| 2847 | 2846 | 2849 | 5 |
| 2848 | 2846 | 2849 | 5 |
| 2846 | 2849 | 2850 | 5 |
| 2846 | 2849 | 2851 | 5 |
| 2846 | 2849 | 2852 | 5 |
| 2850 | 2849 | 2851 | 5 |
| 2850 | 2849 | 2852 | 5 |
| 2851 | 2849 | 2852 | 5 |
| 2849 | 2852 | 2853 | 5 |
| 2849 | 2852 | 2857 | 5 |
| 2849 | 2852 | 2861 | 5 |
| 2853 | 2852 | 2857 | 5 |
| 2853 | 2852 | 2861 | 5 |
| 2857 | 2852 | 2861 | 5 |
| 2852 | 2853 | 2854 | 5 |
| 2852 | 2853 | 2855 | 5 |
| 2852 | 2853 | 2856 | 5 |
| 2854 | 2853 | 2855 | 5 |
| 2854 | 2853 | 2856 | 5 |
| 2855 | 2853 | 2856 | 5 |
| 2852 | 2857 | 2858 | 5 |
| 2852 | 2857 | 2859 | 5 |
| 2852 | 2857 | 2860 | 5 |
| 2858 | 2857 | 2859 | 5 |
| 2858 | 2857 | 2860 | 5 |
| 2859 | 2857 | 2860 | 5 |
| 2852 | 2861 | 2862 | 5 |
| 2852 | 2861 | 2863 | 5 |
| 2852 | 2861 | 2864 | 5 |
| 2862 | 2861 | 2863 | 5 |
| 2862 | 2861 | 2864 | 5 |
| 2863 | 2861 | 2864 | 5 |
| 2837 | 2865 | 2866 | 5 |



|      |      |      |   |
|------|------|------|---|
| 2837 | 2865 | 2867 | 5 |
| 2837 | 2865 | 2870 | 5 |
| 2866 | 2865 | 2867 | 5 |
| 2866 | 2865 | 2870 | 5 |
| 2867 | 2865 | 2870 | 5 |
| 2865 | 2867 | 2868 | 5 |
| 2865 | 2867 | 2869 | 5 |
| 2868 | 2867 | 2869 | 5 |
| 2865 | 2870 | 2871 | 5 |
| 2865 | 2870 | 2872 | 5 |
| 2865 | 2870 | 2873 | 5 |
| 2871 | 2870 | 2872 | 5 |
| 2871 | 2870 | 2873 | 5 |
| 2872 | 2870 | 2873 | 5 |
| 2870 | 2873 | 2874 | 5 |
| 2870 | 2873 | 2875 | 5 |
| 2870 | 2873 | 2900 | 5 |
| 2874 | 2873 | 2875 | 5 |
| 2874 | 2873 | 2900 | 5 |
| 2875 | 2873 | 2900 | 5 |
| 2873 | 2875 | 2876 | 5 |
| 2873 | 2875 | 2877 | 5 |
| 2873 | 2875 | 2878 | 5 |
| 2876 | 2875 | 2877 | 5 |
| 2876 | 2875 | 2878 | 5 |
| 2877 | 2875 | 2878 | 5 |
| 2875 | 2878 | 2879 | 5 |
| 2875 | 2878 | 2880 | 5 |
| 2875 | 2878 | 2881 | 5 |
| 2879 | 2878 | 2880 | 5 |
| 2879 | 2878 | 2881 | 5 |
| 2880 | 2878 | 2881 | 5 |
| 2878 | 2881 | 2882 | 5 |
| 2878 | 2881 | 2883 | 5 |
| 2878 | 2881 | 2884 | 5 |
| 2882 | 2881 | 2883 | 5 |
| 2882 | 2881 | 2884 | 5 |
| 2883 | 2881 | 2884 | 5 |
| 2881 | 2884 | 2885 | 5 |
| 2881 | 2884 | 2886 | 5 |
| 2881 | 2884 | 2887 | 5 |
| 2885 | 2884 | 2886 | 5 |
| 2885 | 2884 | 2887 | 5 |
| 2886 | 2884 | 2887 | 5 |
| 2884 | 2887 | 2888 | 5 |
| 2884 | 2887 | 2889 | 5 |
| 2884 | 2887 | 2890 | 5 |
| 2888 | 2887 | 2889 | 5 |
| 2888 | 2887 | 2890 | 5 |
| 2889 | 2887 | 2890 | 5 |
| 2887 | 2890 | 2891 | 5 |
| 2887 | 2890 | 2892 | 5 |
| 2887 | 2890 | 2893 | 5 |
| 2891 | 2890 | 2892 | 5 |

|      |      |      |   |
|------|------|------|---|
| 2891 | 2890 | 2893 | 5 |
| 2892 | 2890 | 2893 | 5 |
| 2890 | 2893 | 2894 | 5 |
| 2890 | 2893 | 2895 | 5 |
| 2890 | 2893 | 2896 | 5 |
| 2894 | 2893 | 2895 | 5 |
| 2894 | 2893 | 2896 | 5 |
| 2895 | 2893 | 2896 | 5 |
| 2893 | 2896 | 2897 | 5 |
| 2893 | 2896 | 2898 | 5 |
| 2893 | 2896 | 2899 | 5 |
| 2897 | 2896 | 2898 | 5 |
| 2897 | 2896 | 2899 | 5 |
| 2898 | 2896 | 2899 | 5 |
| 2873 | 2900 | 2901 | 5 |
| 2873 | 2900 | 2902 | 5 |
| 2873 | 2900 | 2928 | 5 |
| 2901 | 2900 | 2902 | 5 |
| 2901 | 2900 | 2928 | 5 |
| 2902 | 2900 | 2928 | 5 |
| 2900 | 2902 | 2903 | 5 |
| 2900 | 2902 | 2904 | 5 |
| 2903 | 2902 | 2904 | 5 |
| 2902 | 2904 | 2905 | 5 |
| 2902 | 2904 | 2906 | 5 |
| 2905 | 2904 | 2906 | 5 |
| 2904 | 2906 | 2907 | 5 |
| 2904 | 2906 | 2908 | 5 |
| 2904 | 2906 | 2909 | 5 |
| 2907 | 2906 | 2908 | 5 |
| 2907 | 2906 | 2909 | 5 |
| 2908 | 2906 | 2909 | 5 |
| 2906 | 2909 | 2910 | 5 |
| 2906 | 2909 | 2911 | 5 |
| 2906 | 2909 | 2912 | 5 |
| 2910 | 2909 | 2911 | 5 |
| 2910 | 2909 | 2912 | 5 |
| 2911 | 2909 | 2912 | 5 |
| 2909 | 2912 | 2913 | 5 |
| 2909 | 2912 | 2914 | 5 |
| 2909 | 2912 | 2915 | 5 |
| 2913 | 2912 | 2914 | 5 |
| 2913 | 2912 | 2915 | 5 |
| 2914 | 2912 | 2915 | 5 |
| 2912 | 2915 | 2916 | 5 |
| 2912 | 2915 | 2920 | 5 |
| 2912 | 2915 | 2924 | 5 |
| 2916 | 2915 | 2920 | 5 |
| 2916 | 2915 | 2924 | 5 |
| 2920 | 2915 | 2924 | 5 |
| 2915 | 2916 | 2917 | 5 |
| 2915 | 2916 | 2918 | 5 |
| 2915 | 2916 | 2919 | 5 |
| 2917 | 2916 | 2918 | 5 |

|      |      |      |   |
|------|------|------|---|
| 2917 | 2916 | 2919 | 5 |
| 2918 | 2916 | 2919 | 5 |
| 2915 | 2920 | 2921 | 5 |
| 2915 | 2920 | 2922 | 5 |
| 2915 | 2920 | 2923 | 5 |
| 2921 | 2920 | 2922 | 5 |
| 2921 | 2920 | 2923 | 5 |
| 2922 | 2920 | 2923 | 5 |
| 2915 | 2924 | 2925 | 5 |
| 2915 | 2924 | 2926 | 5 |
| 2915 | 2924 | 2927 | 5 |
| 2925 | 2924 | 2926 | 5 |
| 2925 | 2924 | 2927 | 5 |
| 2926 | 2924 | 2927 | 5 |
| 2900 | 2928 | 2929 | 5 |
| 2900 | 2928 | 2930 | 5 |
| 2900 | 2928 | 2933 | 5 |
| 2929 | 2928 | 2930 | 5 |
| 2929 | 2928 | 2933 | 5 |
| 2930 | 2928 | 2933 | 5 |
| 2928 | 2930 | 2931 | 5 |
| 2928 | 2930 | 2932 | 5 |
| 2931 | 2930 | 2932 | 5 |
| 2928 | 2933 | 2934 | 5 |
| 2928 | 2933 | 2935 | 5 |
| 2928 | 2933 | 2936 | 5 |
| 2934 | 2933 | 2935 | 5 |
| 2934 | 2933 | 2936 | 5 |
| 2935 | 2933 | 2936 | 5 |
| 2933 | 2936 | 2937 | 5 |
| 2933 | 2936 | 2938 | 5 |
| 2933 | 2936 | 2963 | 5 |
| 2937 | 2936 | 2938 | 5 |
| 2937 | 2936 | 2963 | 5 |
| 2938 | 2936 | 2963 | 5 |
| 2936 | 2938 | 2939 | 5 |
| 2936 | 2938 | 2940 | 5 |
| 2936 | 2938 | 2941 | 5 |
| 2939 | 2938 | 2940 | 5 |
| 2939 | 2938 | 2941 | 5 |
| 2940 | 2938 | 2941 | 5 |
| 2938 | 2941 | 2942 | 5 |
| 2938 | 2941 | 2943 | 5 |
| 2938 | 2941 | 2944 | 5 |
| 2942 | 2941 | 2943 | 5 |
| 2942 | 2941 | 2944 | 5 |
| 2943 | 2941 | 2944 | 5 |
| 2941 | 2944 | 2945 | 5 |
| 2941 | 2944 | 2946 | 5 |
| 2941 | 2944 | 2947 | 5 |
| 2945 | 2944 | 2946 | 5 |
| 2945 | 2944 | 2947 | 5 |
| 2946 | 2944 | 2947 | 5 |
| 2944 | 2947 | 2948 | 5 |

|      |      |      |   |
|------|------|------|---|
| 2944 | 2947 | 2949 | 5 |
| 2944 | 2947 | 2950 | 5 |
| 2948 | 2947 | 2949 | 5 |
| 2948 | 2947 | 2950 | 5 |
| 2949 | 2947 | 2950 | 5 |
| 2947 | 2950 | 2951 | 5 |
| 2947 | 2950 | 2952 | 5 |
| 2947 | 2950 | 2953 | 5 |
| 2951 | 2950 | 2952 | 5 |
| 2951 | 2950 | 2953 | 5 |
| 2952 | 2950 | 2953 | 5 |
| 2950 | 2953 | 2954 | 5 |
| 2950 | 2953 | 2955 | 5 |
| 2950 | 2953 | 2956 | 5 |
| 2954 | 2953 | 2955 | 5 |
| 2954 | 2953 | 2956 | 5 |
| 2955 | 2953 | 2956 | 5 |
| 2953 | 2956 | 2957 | 5 |
| 2953 | 2956 | 2958 | 5 |
| 2953 | 2956 | 2959 | 5 |
| 2957 | 2956 | 2958 | 5 |
| 2957 | 2956 | 2959 | 5 |
| 2958 | 2956 | 2959 | 5 |
| 2956 | 2959 | 2960 | 5 |
| 2956 | 2959 | 2961 | 5 |
| 2956 | 2959 | 2962 | 5 |
| 2960 | 2959 | 2961 | 5 |
| 2960 | 2959 | 2962 | 5 |
| 2961 | 2959 | 2962 | 5 |
| 2936 | 2963 | 2964 | 5 |
| 2936 | 2963 | 2965 | 5 |
| 2936 | 2963 | 2991 | 5 |
| 2964 | 2963 | 2965 | 5 |
| 2964 | 2963 | 2991 | 5 |
| 2965 | 2963 | 2991 | 5 |
| 2963 | 2965 | 2966 | 5 |
| 2963 | 2965 | 2967 | 5 |
| 2966 | 2965 | 2967 | 5 |
| 2965 | 2967 | 2968 | 5 |
| 2965 | 2967 | 2969 | 5 |
| 2968 | 2967 | 2969 | 5 |
| 2967 | 2969 | 2970 | 5 |
| 2967 | 2969 | 2971 | 5 |
| 2967 | 2969 | 2972 | 5 |
| 2970 | 2969 | 2971 | 5 |
| 2970 | 2969 | 2972 | 5 |
| 2971 | 2969 | 2972 | 5 |
| 2969 | 2972 | 2973 | 5 |
| 2969 | 2972 | 2974 | 5 |
| 2969 | 2972 | 2975 | 5 |
| 2973 | 2972 | 2974 | 5 |
| 2973 | 2972 | 2975 | 5 |
| 2974 | 2972 | 2975 | 5 |
| 2972 | 2975 | 2976 | 5 |

|      |      |      |   |
|------|------|------|---|
| 2972 | 2975 | 2977 | 5 |
| 2972 | 2975 | 2978 | 5 |
| 2976 | 2975 | 2977 | 5 |
| 2976 | 2975 | 2978 | 5 |
| 2977 | 2975 | 2978 | 5 |
| 2975 | 2978 | 2979 | 5 |
| 2975 | 2978 | 2983 | 5 |
| 2975 | 2978 | 2987 | 5 |
| 2979 | 2978 | 2983 | 5 |
| 2979 | 2978 | 2987 | 5 |
| 2983 | 2978 | 2987 | 5 |
| 2978 | 2979 | 2980 | 5 |
| 2978 | 2979 | 2981 | 5 |
| 2978 | 2979 | 2982 | 5 |
| 2980 | 2979 | 2981 | 5 |
| 2980 | 2979 | 2982 | 5 |
| 2981 | 2979 | 2982 | 5 |
| 2978 | 2983 | 2984 | 5 |
| 2978 | 2983 | 2985 | 5 |
| 2978 | 2983 | 2986 | 5 |
| 2984 | 2983 | 2985 | 5 |
| 2984 | 2983 | 2986 | 5 |
| 2985 | 2983 | 2986 | 5 |
| 2978 | 2987 | 2988 | 5 |
| 2978 | 2987 | 2989 | 5 |
| 2978 | 2987 | 2990 | 5 |
| 2988 | 2987 | 2989 | 5 |
| 2988 | 2987 | 2990 | 5 |
| 2989 | 2987 | 2990 | 5 |
| 2963 | 2991 | 2992 | 5 |
| 2963 | 2991 | 2993 | 5 |
| 2963 | 2991 | 2996 | 5 |
| 2992 | 2991 | 2993 | 5 |
| 2992 | 2991 | 2996 | 5 |
| 2993 | 2991 | 2996 | 5 |
| 2991 | 2993 | 2994 | 5 |
| 2991 | 2993 | 2995 | 5 |
| 2994 | 2993 | 2995 | 5 |
| 2991 | 2996 | 2997 | 5 |
| 2991 | 2996 | 2998 | 5 |
| 2991 | 2996 | 2999 | 5 |
| 2997 | 2996 | 2998 | 5 |
| 2997 | 2996 | 2999 | 5 |
| 2998 | 2996 | 2999 | 5 |
| 2996 | 2999 | 3000 | 5 |
| 2996 | 2999 | 3001 | 5 |
| 2996 | 2999 | 3026 | 5 |
| 3000 | 2999 | 3001 | 5 |
| 3000 | 2999 | 3026 | 5 |
| 3001 | 2999 | 3026 | 5 |
| 2999 | 3001 | 3002 | 5 |
| 2999 | 3001 | 3003 | 5 |
| 2999 | 3001 | 3004 | 5 |
| 3002 | 3001 | 3003 | 5 |

|      |      |      |   |
|------|------|------|---|
| 3002 | 3001 | 3004 | 5 |
| 3003 | 3001 | 3004 | 5 |
| 3001 | 3004 | 3005 | 5 |
| 3001 | 3004 | 3006 | 5 |
| 3001 | 3004 | 3007 | 5 |
| 3005 | 3004 | 3006 | 5 |
| 3005 | 3004 | 3007 | 5 |
| 3006 | 3004 | 3007 | 5 |
| 3004 | 3007 | 3008 | 5 |
| 3004 | 3007 | 3009 | 5 |
| 3004 | 3007 | 3010 | 5 |
| 3008 | 3007 | 3009 | 5 |
| 3008 | 3007 | 3010 | 5 |
| 3009 | 3007 | 3010 | 5 |
| 3007 | 3010 | 3011 | 5 |
| 3007 | 3010 | 3012 | 5 |
| 3007 | 3010 | 3013 | 5 |
| 3011 | 3010 | 3012 | 5 |
| 3011 | 3010 | 3013 | 5 |
| 3012 | 3010 | 3013 | 5 |
| 3010 | 3013 | 3014 | 5 |
| 3010 | 3013 | 3015 | 5 |
| 3010 | 3013 | 3016 | 5 |
| 3014 | 3013 | 3015 | 5 |
| 3014 | 3013 | 3016 | 5 |
| 3015 | 3013 | 3016 | 5 |
| 3013 | 3016 | 3017 | 5 |
| 3013 | 3016 | 3018 | 5 |
| 3013 | 3016 | 3019 | 5 |
| 3017 | 3016 | 3018 | 5 |
| 3017 | 3016 | 3019 | 5 |
| 3018 | 3016 | 3019 | 5 |
| 3016 | 3019 | 3020 | 5 |
| 3016 | 3019 | 3021 | 5 |
| 3016 | 3019 | 3022 | 5 |
| 3020 | 3019 | 3021 | 5 |
| 3020 | 3019 | 3022 | 5 |
| 3021 | 3019 | 3022 | 5 |
| 3019 | 3022 | 3023 | 5 |
| 3019 | 3022 | 3024 | 5 |
| 3019 | 3022 | 3025 | 5 |
| 3023 | 3022 | 3024 | 5 |
| 3023 | 3022 | 3025 | 5 |
| 3024 | 3022 | 3025 | 5 |
| 2999 | 3026 | 3027 | 5 |
| 2999 | 3026 | 3028 | 5 |
| 2999 | 3026 | 3054 | 5 |
| 3027 | 3026 | 3028 | 5 |
| 3027 | 3026 | 3054 | 5 |
| 3028 | 3026 | 3054 | 5 |
| 3026 | 3028 | 3029 | 5 |
| 3026 | 3028 | 3030 | 5 |
| 3029 | 3028 | 3030 | 5 |
| 3028 | 3030 | 3031 | 5 |

|      |      |      |   |
|------|------|------|---|
| 3028 | 3030 | 3032 | 5 |
| 3031 | 3030 | 3032 | 5 |
| 3030 | 3032 | 3033 | 5 |
| 3030 | 3032 | 3034 | 5 |
| 3030 | 3032 | 3035 | 5 |
| 3033 | 3032 | 3034 | 5 |
| 3033 | 3032 | 3035 | 5 |
| 3034 | 3032 | 3035 | 5 |
| 3032 | 3035 | 3036 | 5 |
| 3032 | 3035 | 3037 | 5 |
| 3032 | 3035 | 3038 | 5 |
| 3036 | 3035 | 3037 | 5 |
| 3036 | 3035 | 3038 | 5 |
| 3037 | 3035 | 3038 | 5 |
| 3035 | 3038 | 3039 | 5 |
| 3035 | 3038 | 3040 | 5 |
| 3035 | 3038 | 3041 | 5 |
| 3039 | 3038 | 3040 | 5 |
| 3039 | 3038 | 3041 | 5 |
| 3040 | 3038 | 3041 | 5 |
| 3038 | 3041 | 3042 | 5 |
| 3038 | 3041 | 3046 | 5 |
| 3038 | 3041 | 3050 | 5 |
| 3042 | 3041 | 3046 | 5 |
| 3042 | 3041 | 3050 | 5 |
| 3046 | 3041 | 3050 | 5 |
| 3041 | 3042 | 3043 | 5 |
| 3041 | 3042 | 3044 | 5 |
| 3041 | 3042 | 3045 | 5 |
| 3043 | 3042 | 3044 | 5 |
| 3043 | 3042 | 3045 | 5 |
| 3044 | 3042 | 3045 | 5 |
| 3041 | 3046 | 3047 | 5 |
| 3041 | 3046 | 3048 | 5 |
| 3041 | 3046 | 3049 | 5 |
| 3047 | 3046 | 3048 | 5 |
| 3047 | 3046 | 3049 | 5 |
| 3048 | 3046 | 3049 | 5 |
| 3041 | 3050 | 3051 | 5 |
| 3041 | 3050 | 3052 | 5 |
| 3041 | 3050 | 3053 | 5 |
| 3051 | 3050 | 3052 | 5 |
| 3051 | 3050 | 3053 | 5 |
| 3052 | 3050 | 3053 | 5 |
| 3026 | 3054 | 3055 | 5 |
| 3026 | 3054 | 3056 | 5 |
| 3026 | 3054 | 3059 | 5 |
| 3055 | 3054 | 3056 | 5 |
| 3055 | 3054 | 3059 | 5 |
| 3056 | 3054 | 3059 | 5 |
| 3054 | 3056 | 3057 | 5 |
| 3054 | 3056 | 3058 | 5 |
| 3057 | 3056 | 3058 | 5 |
| 3054 | 3059 | 3060 | 5 |

|      |      |      |   |
|------|------|------|---|
| 3054 | 3059 | 3061 | 5 |
| 3054 | 3059 | 3062 | 5 |
| 3060 | 3059 | 3061 | 5 |
| 3060 | 3059 | 3062 | 5 |
| 3061 | 3059 | 3062 | 5 |
| 3059 | 3062 | 3063 | 5 |
| 3059 | 3062 | 3064 | 5 |
| 3059 | 3062 | 3089 | 5 |
| 3063 | 3062 | 3064 | 5 |
| 3063 | 3062 | 3089 | 5 |
| 3064 | 3062 | 3089 | 5 |
| 3062 | 3064 | 3065 | 5 |
| 3062 | 3064 | 3066 | 5 |
| 3062 | 3064 | 3067 | 5 |
| 3065 | 3064 | 3066 | 5 |
| 3065 | 3064 | 3067 | 5 |
| 3066 | 3064 | 3067 | 5 |
| 3064 | 3067 | 3068 | 5 |
| 3064 | 3067 | 3069 | 5 |
| 3064 | 3067 | 3070 | 5 |
| 3068 | 3067 | 3069 | 5 |
| 3068 | 3067 | 3070 | 5 |
| 3069 | 3067 | 3070 | 5 |
| 3067 | 3070 | 3071 | 5 |
| 3067 | 3070 | 3072 | 5 |
| 3067 | 3070 | 3073 | 5 |
| 3071 | 3070 | 3072 | 5 |
| 3071 | 3070 | 3073 | 5 |
| 3072 | 3070 | 3073 | 5 |
| 3070 | 3073 | 3074 | 5 |
| 3070 | 3073 | 3075 | 5 |
| 3070 | 3073 | 3076 | 5 |
| 3074 | 3073 | 3075 | 5 |
| 3074 | 3073 | 3076 | 5 |
| 3075 | 3073 | 3076 | 5 |
| 3073 | 3076 | 3077 | 5 |
| 3073 | 3076 | 3078 | 5 |
| 3073 | 3076 | 3079 | 5 |
| 3077 | 3076 | 3078 | 5 |
| 3077 | 3076 | 3079 | 5 |
| 3078 | 3076 | 3079 | 5 |
| 3076 | 3079 | 3080 | 5 |
| 3076 | 3079 | 3081 | 5 |
| 3076 | 3079 | 3082 | 5 |
| 3080 | 3079 | 3081 | 5 |
| 3080 | 3079 | 3082 | 5 |
| 3081 | 3079 | 3082 | 5 |
| 3079 | 3082 | 3083 | 5 |
| 3079 | 3082 | 3084 | 5 |
| 3079 | 3082 | 3085 | 5 |
| 3083 | 3082 | 3084 | 5 |
| 3083 | 3082 | 3085 | 5 |
| 3084 | 3082 | 3085 | 5 |
| 3082 | 3085 | 3086 | 5 |



|      |      |      |   |
|------|------|------|---|
| 3082 | 3085 | 3087 | 5 |
| 3082 | 3085 | 3088 | 5 |
| 3086 | 3085 | 3087 | 5 |
| 3086 | 3085 | 3088 | 5 |
| 3087 | 3085 | 3088 | 5 |
| 3062 | 3089 | 3090 | 5 |
| 3062 | 3089 | 3091 | 5 |
| 3062 | 3089 | 3117 | 5 |
| 3090 | 3089 | 3091 | 5 |
| 3090 | 3089 | 3117 | 5 |
| 3091 | 3089 | 3117 | 5 |
| 3089 | 3091 | 3092 | 5 |
| 3089 | 3091 | 3093 | 5 |
| 3092 | 3091 | 3093 | 5 |
| 3091 | 3093 | 3094 | 5 |
| 3091 | 3093 | 3095 | 5 |
| 3094 | 3093 | 3095 | 5 |
| 3093 | 3095 | 3096 | 5 |
| 3093 | 3095 | 3097 | 5 |
| 3093 | 3095 | 3098 | 5 |
| 3096 | 3095 | 3097 | 5 |
| 3096 | 3095 | 3098 | 5 |
| 3097 | 3095 | 3098 | 5 |
| 3095 | 3098 | 3099 | 5 |
| 3095 | 3098 | 3100 | 5 |
| 3095 | 3098 | 3101 | 5 |
| 3099 | 3098 | 3100 | 5 |
| 3099 | 3098 | 3101 | 5 |
| 3100 | 3098 | 3101 | 5 |
| 3098 | 3101 | 3102 | 5 |
| 3098 | 3101 | 3103 | 5 |
| 3098 | 3101 | 3104 | 5 |
| 3102 | 3101 | 3103 | 5 |
| 3102 | 3101 | 3104 | 5 |
| 3103 | 3101 | 3104 | 5 |
| 3101 | 3104 | 3105 | 5 |
| 3101 | 3104 | 3109 | 5 |
| 3101 | 3104 | 3113 | 5 |
| 3105 | 3104 | 3109 | 5 |
| 3105 | 3104 | 3113 | 5 |
| 3109 | 3104 | 3113 | 5 |
| 3104 | 3105 | 3106 | 5 |
| 3104 | 3105 | 3107 | 5 |
| 3104 | 3105 | 3108 | 5 |
| 3106 | 3105 | 3107 | 5 |
| 3106 | 3105 | 3108 | 5 |
| 3107 | 3105 | 3108 | 5 |
| 3104 | 3109 | 3110 | 5 |
| 3104 | 3109 | 3111 | 5 |
| 3104 | 3109 | 3112 | 5 |
| 3110 | 3109 | 3111 | 5 |
| 3110 | 3109 | 3112 | 5 |
| 3111 | 3109 | 3112 | 5 |
| 3104 | 3113 | 3114 | 5 |

|      |      |      |   |
|------|------|------|---|
| 3104 | 3113 | 3115 | 5 |
| 3104 | 3113 | 3116 | 5 |
| 3114 | 3113 | 3115 | 5 |
| 3114 | 3113 | 3116 | 5 |
| 3115 | 3113 | 3116 | 5 |
| 3089 | 3117 | 3118 | 5 |
| 3089 | 3117 | 3119 | 5 |
| 3089 | 3117 | 3122 | 5 |
| 3118 | 3117 | 3119 | 5 |
| 3118 | 3117 | 3122 | 5 |
| 3119 | 3117 | 3122 | 5 |
| 3117 | 3119 | 3120 | 5 |
| 3117 | 3119 | 3121 | 5 |
| 3120 | 3119 | 3121 | 5 |
| 3117 | 3122 | 3123 | 5 |
| 3117 | 3122 | 3124 | 5 |
| 3117 | 3122 | 3125 | 5 |
| 3123 | 3122 | 3124 | 5 |
| 3123 | 3122 | 3125 | 5 |
| 3124 | 3122 | 3125 | 5 |
| 3122 | 3125 | 3126 | 5 |
| 3122 | 3125 | 3127 | 5 |
| 3122 | 3125 | 3152 | 5 |
| 3126 | 3125 | 3127 | 5 |
| 3126 | 3125 | 3152 | 5 |
| 3127 | 3125 | 3152 | 5 |
| 3125 | 3127 | 3128 | 5 |
| 3125 | 3127 | 3129 | 5 |
| 3125 | 3127 | 3130 | 5 |
| 3128 | 3127 | 3129 | 5 |
| 3128 | 3127 | 3130 | 5 |
| 3129 | 3127 | 3130 | 5 |
| 3127 | 3130 | 3131 | 5 |
| 3127 | 3130 | 3132 | 5 |
| 3127 | 3130 | 3133 | 5 |
| 3131 | 3130 | 3132 | 5 |
| 3131 | 3130 | 3133 | 5 |
| 3132 | 3130 | 3133 | 5 |
| 3130 | 3133 | 3134 | 5 |
| 3130 | 3133 | 3135 | 5 |
| 3130 | 3133 | 3136 | 5 |
| 3134 | 3133 | 3135 | 5 |
| 3134 | 3133 | 3136 | 5 |
| 3135 | 3133 | 3136 | 5 |
| 3133 | 3136 | 3137 | 5 |
| 3133 | 3136 | 3138 | 5 |
| 3133 | 3136 | 3139 | 5 |
| 3137 | 3136 | 3138 | 5 |
| 3137 | 3136 | 3139 | 5 |
| 3138 | 3136 | 3139 | 5 |
| 3136 | 3139 | 3140 | 5 |
| 3136 | 3139 | 3141 | 5 |
| 3136 | 3139 | 3142 | 5 |
| 3140 | 3139 | 3141 | 5 |

|      |      |      |   |
|------|------|------|---|
| 3140 | 3139 | 3142 | 5 |
| 3141 | 3139 | 3142 | 5 |
| 3139 | 3142 | 3143 | 5 |
| 3139 | 3142 | 3144 | 5 |
| 3139 | 3142 | 3145 | 5 |
| 3143 | 3142 | 3144 | 5 |
| 3143 | 3142 | 3145 | 5 |
| 3144 | 3142 | 3145 | 5 |
| 3142 | 3145 | 3146 | 5 |
| 3142 | 3145 | 3147 | 5 |
| 3142 | 3145 | 3148 | 5 |
| 3146 | 3145 | 3147 | 5 |
| 3146 | 3145 | 3148 | 5 |
| 3147 | 3145 | 3148 | 5 |
| 3145 | 3148 | 3149 | 5 |
| 3145 | 3148 | 3150 | 5 |
| 3145 | 3148 | 3151 | 5 |
| 3149 | 3148 | 3150 | 5 |
| 3149 | 3148 | 3151 | 5 |
| 3150 | 3148 | 3151 | 5 |
| 3125 | 3152 | 3153 | 5 |
| 3125 | 3152 | 3154 | 5 |
| 3125 | 3152 | 3180 | 5 |
| 3153 | 3152 | 3154 | 5 |
| 3153 | 3152 | 3180 | 5 |
| 3154 | 3152 | 3180 | 5 |
| 3152 | 3154 | 3155 | 5 |
| 3152 | 3154 | 3156 | 5 |
| 3155 | 3154 | 3156 | 5 |
| 3154 | 3156 | 3157 | 5 |
| 3154 | 3156 | 3158 | 5 |
| 3157 | 3156 | 3158 | 5 |
| 3156 | 3158 | 3159 | 5 |
| 3156 | 3158 | 3160 | 5 |
| 3156 | 3158 | 3161 | 5 |
| 3159 | 3158 | 3160 | 5 |
| 3159 | 3158 | 3161 | 5 |
| 3160 | 3158 | 3161 | 5 |
| 3158 | 3161 | 3162 | 5 |
| 3158 | 3161 | 3163 | 5 |
| 3158 | 3161 | 3164 | 5 |
| 3162 | 3161 | 3163 | 5 |
| 3162 | 3161 | 3164 | 5 |
| 3163 | 3161 | 3164 | 5 |
| 3161 | 3164 | 3165 | 5 |
| 3161 | 3164 | 3166 | 5 |
| 3161 | 3164 | 3167 | 5 |
| 3165 | 3164 | 3166 | 5 |
| 3165 | 3164 | 3167 | 5 |
| 3166 | 3164 | 3167 | 5 |
| 3164 | 3167 | 3168 | 5 |
| 3164 | 3167 | 3172 | 5 |
| 3164 | 3167 | 3176 | 5 |
| 3168 | 3167 | 3172 | 5 |

|      |      |      |   |
|------|------|------|---|
| 3168 | 3167 | 3176 | 5 |
| 3172 | 3167 | 3176 | 5 |
| 3167 | 3168 | 3169 | 5 |
| 3167 | 3168 | 3170 | 5 |
| 3167 | 3168 | 3171 | 5 |
| 3169 | 3168 | 3170 | 5 |
| 3169 | 3168 | 3171 | 5 |
| 3170 | 3168 | 3171 | 5 |
| 3167 | 3172 | 3173 | 5 |
| 3167 | 3172 | 3174 | 5 |
| 3167 | 3172 | 3175 | 5 |
| 3173 | 3172 | 3174 | 5 |
| 3173 | 3172 | 3175 | 5 |
| 3174 | 3172 | 3175 | 5 |
| 3167 | 3176 | 3177 | 5 |
| 3167 | 3176 | 3178 | 5 |
| 3167 | 3176 | 3179 | 5 |
| 3177 | 3176 | 3178 | 5 |
| 3177 | 3176 | 3179 | 5 |
| 3178 | 3176 | 3179 | 5 |
| 3152 | 3180 | 3181 | 5 |
| 3152 | 3180 | 3182 | 5 |
| 3152 | 3180 | 3185 | 5 |
| 3181 | 3180 | 3182 | 5 |
| 3181 | 3180 | 3185 | 5 |
| 3182 | 3180 | 3185 | 5 |
| 3180 | 3182 | 3183 | 5 |
| 3180 | 3182 | 3184 | 5 |
| 3183 | 3182 | 3184 | 5 |
| 3180 | 3185 | 3186 | 5 |
| 3180 | 3185 | 3187 | 5 |
| 3180 | 3185 | 3188 | 5 |
| 3186 | 3185 | 3187 | 5 |
| 3186 | 3185 | 3188 | 5 |
| 3187 | 3185 | 3188 | 5 |
| 3185 | 3188 | 3189 | 5 |
| 3185 | 3188 | 3190 | 5 |
| 3185 | 3188 | 3215 | 5 |
| 3189 | 3188 | 3190 | 5 |
| 3189 | 3188 | 3215 | 5 |
| 3190 | 3188 | 3215 | 5 |
| 3188 | 3190 | 3191 | 5 |
| 3188 | 3190 | 3192 | 5 |
| 3188 | 3190 | 3193 | 5 |
| 3191 | 3190 | 3192 | 5 |
| 3191 | 3190 | 3193 | 5 |
| 3192 | 3190 | 3193 | 5 |
| 3190 | 3193 | 3194 | 5 |
| 3190 | 3193 | 3195 | 5 |
| 3190 | 3193 | 3196 | 5 |
| 3194 | 3193 | 3195 | 5 |
| 3194 | 3193 | 3196 | 5 |
| 3195 | 3193 | 3196 | 5 |
| 3193 | 3196 | 3197 | 5 |

|      |      |      |   |
|------|------|------|---|
| 3193 | 3196 | 3198 | 5 |
| 3193 | 3196 | 3199 | 5 |
| 3197 | 3196 | 3198 | 5 |
| 3197 | 3196 | 3199 | 5 |
| 3198 | 3196 | 3199 | 5 |
| 3196 | 3199 | 3200 | 5 |
| 3196 | 3199 | 3201 | 5 |
| 3196 | 3199 | 3202 | 5 |
| 3200 | 3199 | 3201 | 5 |
| 3200 | 3199 | 3202 | 5 |
| 3201 | 3199 | 3202 | 5 |
| 3199 | 3202 | 3203 | 5 |
| 3199 | 3202 | 3204 | 5 |
| 3199 | 3202 | 3205 | 5 |
| 3203 | 3202 | 3204 | 5 |
| 3203 | 3202 | 3205 | 5 |
| 3204 | 3202 | 3205 | 5 |
| 3202 | 3205 | 3206 | 5 |
| 3202 | 3205 | 3207 | 5 |
| 3202 | 3205 | 3208 | 5 |
| 3206 | 3205 | 3207 | 5 |
| 3206 | 3205 | 3208 | 5 |
| 3207 | 3205 | 3208 | 5 |
| 3205 | 3208 | 3209 | 5 |
| 3205 | 3208 | 3210 | 5 |
| 3205 | 3208 | 3211 | 5 |
| 3209 | 3208 | 3210 | 5 |
| 3209 | 3208 | 3211 | 5 |
| 3210 | 3208 | 3211 | 5 |
| 3208 | 3211 | 3212 | 5 |
| 3208 | 3211 | 3213 | 5 |
| 3208 | 3211 | 3214 | 5 |
| 3212 | 3211 | 3213 | 5 |
| 3212 | 3211 | 3214 | 5 |
| 3213 | 3211 | 3214 | 5 |
| 3188 | 3215 | 3216 | 5 |
| 3188 | 3215 | 3217 | 5 |
| 3188 | 3215 | 3243 | 5 |
| 3216 | 3215 | 3217 | 5 |
| 3216 | 3215 | 3243 | 5 |
| 3217 | 3215 | 3243 | 5 |
| 3215 | 3217 | 3218 | 5 |
| 3215 | 3217 | 3219 | 5 |
| 3218 | 3217 | 3219 | 5 |
| 3217 | 3219 | 3220 | 5 |
| 3217 | 3219 | 3221 | 5 |
| 3220 | 3219 | 3221 | 5 |
| 3219 | 3221 | 3222 | 5 |
| 3219 | 3221 | 3223 | 5 |
| 3219 | 3221 | 3224 | 5 |
| 3222 | 3221 | 3223 | 5 |
| 3222 | 3221 | 3224 | 5 |
| 3223 | 3221 | 3224 | 5 |
| 3221 | 3224 | 3225 | 5 |

|      |      |      |   |
|------|------|------|---|
| 3221 | 3224 | 3226 | 5 |
| 3221 | 3224 | 3227 | 5 |
| 3225 | 3224 | 3226 | 5 |
| 3225 | 3224 | 3227 | 5 |
| 3226 | 3224 | 3227 | 5 |
| 3224 | 3227 | 3228 | 5 |
| 3224 | 3227 | 3229 | 5 |
| 3224 | 3227 | 3230 | 5 |
| 3228 | 3227 | 3229 | 5 |
| 3228 | 3227 | 3230 | 5 |
| 3229 | 3227 | 3230 | 5 |
| 3227 | 3230 | 3231 | 5 |
| 3227 | 3230 | 3235 | 5 |
| 3227 | 3230 | 3239 | 5 |
| 3231 | 3230 | 3235 | 5 |
| 3231 | 3230 | 3239 | 5 |
| 3235 | 3230 | 3239 | 5 |
| 3230 | 3231 | 3232 | 5 |
| 3230 | 3231 | 3233 | 5 |
| 3230 | 3231 | 3234 | 5 |
| 3232 | 3231 | 3233 | 5 |
| 3232 | 3231 | 3234 | 5 |
| 3233 | 3231 | 3234 | 5 |
| 3230 | 3235 | 3236 | 5 |
| 3230 | 3235 | 3237 | 5 |
| 3230 | 3235 | 3238 | 5 |
| 3236 | 3235 | 3237 | 5 |
| 3236 | 3235 | 3238 | 5 |
| 3237 | 3235 | 3238 | 5 |
| 3230 | 3239 | 3240 | 5 |
| 3230 | 3239 | 3241 | 5 |
| 3230 | 3239 | 3242 | 5 |
| 3240 | 3239 | 3241 | 5 |
| 3240 | 3239 | 3242 | 5 |
| 3241 | 3239 | 3242 | 5 |
| 3215 | 3243 | 3244 | 5 |
| 3215 | 3243 | 3245 | 5 |
| 3215 | 3243 | 3248 | 5 |
| 3244 | 3243 | 3245 | 5 |
| 3244 | 3243 | 3248 | 5 |
| 3245 | 3243 | 3248 | 5 |
| 3243 | 3245 | 3246 | 5 |
| 3243 | 3245 | 3247 | 5 |
| 3246 | 3245 | 3247 | 5 |
| 3243 | 3248 | 3249 | 5 |
| 3243 | 3248 | 3250 | 5 |
| 3243 | 3248 | 3251 | 5 |
| 3249 | 3248 | 3250 | 5 |
| 3249 | 3248 | 3251 | 5 |
| 3250 | 3248 | 3251 | 5 |
| 3248 | 3251 | 3252 | 5 |
| 3248 | 3251 | 3253 | 5 |
| 3248 | 3251 | 3254 | 5 |
| 3252 | 3251 | 3253 | 5 |

|      |      |      |   |
|------|------|------|---|
| 3252 | 3251 | 3254 | 5 |
| 3253 | 3251 | 3254 | 5 |
| 3251 | 3254 | 3255 | 5 |
| 3251 | 3254 | 3256 | 5 |
| 3251 | 3254 | 3257 | 5 |
| 3255 | 3254 | 3256 | 5 |
| 3255 | 3254 | 3257 | 5 |
| 3256 | 3254 | 3257 | 5 |
| 3254 | 3257 | 3258 | 5 |
| 3254 | 3257 | 3259 | 5 |
| 3254 | 3257 | 3260 | 5 |
| 3258 | 3257 | 3259 | 5 |
| 3258 | 3257 | 3260 | 5 |
| 3259 | 3257 | 3260 | 5 |
| 3257 | 3260 | 3261 | 5 |
| 3257 | 3260 | 3262 | 5 |
| 3257 | 3260 | 3263 | 5 |
| 3261 | 3260 | 3262 | 5 |
| 3261 | 3260 | 3263 | 5 |
| 3262 | 3260 | 3263 | 5 |
| 3260 | 3263 | 3264 | 5 |
| 3260 | 3263 | 3265 | 5 |
| 3260 | 3263 | 3266 | 5 |
| 3264 | 3263 | 3265 | 5 |
| 3264 | 3263 | 3266 | 5 |
| 3265 | 3263 | 3266 | 5 |
| 3263 | 3266 | 3267 | 5 |
| 3263 | 3266 | 3268 | 5 |
| 3263 | 3266 | 3269 | 5 |
| 3267 | 3266 | 3268 | 5 |
| 3267 | 3266 | 3269 | 5 |
| 3268 | 3266 | 3269 | 5 |
| 3266 | 3269 | 3270 | 5 |
| 3266 | 3269 | 3271 | 5 |
| 3266 | 3269 | 3272 | 5 |
| 3270 | 3269 | 3271 | 5 |
| 3270 | 3269 | 3272 | 5 |
| 3271 | 3269 | 3272 | 5 |
| 3269 | 3272 | 3273 | 5 |
| 3269 | 3272 | 3274 | 5 |
| 3269 | 3272 | 3275 | 5 |
| 3273 | 3272 | 3274 | 5 |
| 3273 | 3272 | 3275 | 5 |
| 3274 | 3272 | 3275 | 5 |
| 3272 | 3275 | 3276 | 5 |
| 3272 | 3275 | 3277 | 5 |
| 3272 | 3275 | 3278 | 5 |
| 3276 | 3275 | 3277 | 5 |
| 3276 | 3275 | 3278 | 5 |
| 3277 | 3275 | 3278 | 5 |

[ dihedrals ]

|      |    |    |    |       |    |    |
|------|----|----|----|-------|----|----|
| ; ai | aj | ak | al | funct | c0 | c1 |
| c2   |    | c3 |    | c4    | c5 |    |

|    |    |    |    |   |
|----|----|----|----|---|
| 2  | 1  | 4  | 5  | 9 |
| 2  | 1  | 4  | 6  | 9 |
| 3  | 1  | 4  | 5  | 9 |
| 3  | 1  | 4  | 6  | 9 |
| 30 | 1  | 4  | 5  | 9 |
| 30 | 1  | 4  | 6  | 9 |
| 2  | 1  | 30 | 31 | 9 |
| 2  | 1  | 30 | 32 | 9 |
| 2  | 1  | 30 | 35 | 9 |
| 3  | 1  | 30 | 31 | 9 |
| 3  | 1  | 30 | 32 | 9 |
| 3  | 1  | 30 | 35 | 9 |
| 4  | 1  | 30 | 31 | 9 |
| 4  | 1  | 30 | 32 | 9 |
| 4  | 1  | 30 | 35 | 9 |
| 1  | 4  | 6  | 7  | 9 |
| 1  | 4  | 6  | 8  | 9 |
| 5  | 4  | 6  | 7  | 9 |
| 5  | 4  | 6  | 8  | 9 |
| 4  | 6  | 8  | 9  | 9 |
| 4  | 6  | 8  | 10 | 9 |
| 4  | 6  | 8  | 11 | 9 |
| 7  | 6  | 8  | 9  | 9 |
| 7  | 6  | 8  | 10 | 9 |
| 7  | 6  | 8  | 11 | 9 |
| 6  | 8  | 11 | 12 | 9 |
| 6  | 8  | 11 | 13 | 9 |
| 6  | 8  | 11 | 14 | 9 |
| 9  | 8  | 11 | 12 | 9 |
| 9  | 8  | 11 | 13 | 9 |
| 9  | 8  | 11 | 14 | 9 |
| 10 | 8  | 11 | 12 | 9 |
| 10 | 8  | 11 | 13 | 9 |
| 10 | 8  | 11 | 14 | 9 |
| 8  | 11 | 14 | 15 | 9 |
| 8  | 11 | 14 | 16 | 9 |
| 8  | 11 | 14 | 17 | 9 |
| 12 | 11 | 14 | 15 | 9 |
| 12 | 11 | 14 | 16 | 9 |
| 12 | 11 | 14 | 17 | 9 |
| 13 | 11 | 14 | 15 | 9 |
| 13 | 11 | 14 | 16 | 9 |
| 13 | 11 | 14 | 17 | 9 |
| 11 | 14 | 17 | 18 | 9 |
| 11 | 14 | 17 | 22 | 9 |
| 11 | 14 | 17 | 26 | 9 |
| 15 | 14 | 17 | 18 | 9 |
| 15 | 14 | 17 | 22 | 9 |
| 15 | 14 | 17 | 26 | 9 |
| 16 | 14 | 17 | 18 | 9 |
| 16 | 14 | 17 | 22 | 9 |
| 16 | 14 | 17 | 26 | 9 |
| 14 | 17 | 18 | 19 | 9 |
| 14 | 17 | 18 | 20 | 9 |



|    |    |    |    |   |
|----|----|----|----|---|
| 14 | 17 | 18 | 21 | 9 |
| 22 | 17 | 18 | 19 | 9 |
| 22 | 17 | 18 | 20 | 9 |
| 22 | 17 | 18 | 21 | 9 |
| 26 | 17 | 18 | 19 | 9 |
| 26 | 17 | 18 | 20 | 9 |
| 26 | 17 | 18 | 21 | 9 |
| 14 | 17 | 22 | 23 | 9 |
| 14 | 17 | 22 | 24 | 9 |
| 14 | 17 | 22 | 25 | 9 |
| 18 | 17 | 22 | 23 | 9 |
| 18 | 17 | 22 | 24 | 9 |
| 18 | 17 | 22 | 25 | 9 |
| 26 | 17 | 22 | 23 | 9 |
| 26 | 17 | 22 | 24 | 9 |
| 26 | 17 | 22 | 25 | 9 |
| 14 | 17 | 26 | 27 | 9 |
| 14 | 17 | 26 | 28 | 9 |
| 14 | 17 | 26 | 29 | 9 |
| 18 | 17 | 26 | 27 | 9 |
| 18 | 17 | 26 | 28 | 9 |
| 18 | 17 | 26 | 29 | 9 |
| 22 | 17 | 26 | 27 | 9 |
| 22 | 17 | 26 | 28 | 9 |
| 22 | 17 | 26 | 29 | 9 |
| 1  | 30 | 32 | 33 | 9 |
| 1  | 30 | 32 | 34 | 9 |
| 31 | 30 | 32 | 33 | 9 |
| 31 | 30 | 32 | 34 | 9 |
| 35 | 30 | 32 | 33 | 9 |
| 35 | 30 | 32 | 34 | 9 |
| 1  | 30 | 35 | 36 | 9 |
| 1  | 30 | 35 | 37 | 9 |
| 1  | 30 | 35 | 38 | 9 |
| 31 | 30 | 35 | 36 | 9 |
| 31 | 30 | 35 | 37 | 9 |
| 31 | 30 | 35 | 38 | 9 |
| 32 | 30 | 35 | 36 | 9 |
| 32 | 30 | 35 | 37 | 9 |
| 32 | 30 | 35 | 38 | 9 |
| 30 | 35 | 38 | 39 | 9 |
| 30 | 35 | 38 | 40 | 9 |
| 30 | 35 | 38 | 65 | 9 |
| 36 | 35 | 38 | 39 | 9 |
| 36 | 35 | 38 | 40 | 9 |
| 36 | 35 | 38 | 65 | 9 |
| 37 | 35 | 38 | 39 | 9 |
| 37 | 35 | 38 | 40 | 9 |
| 37 | 35 | 38 | 65 | 9 |
| 35 | 38 | 40 | 41 | 9 |
| 35 | 38 | 40 | 42 | 9 |
| 35 | 38 | 40 | 43 | 9 |
| 39 | 38 | 40 | 41 | 9 |
| 39 | 38 | 40 | 42 | 9 |

|    |    |    |    |   |
|----|----|----|----|---|
| 39 | 38 | 40 | 43 | 9 |
| 65 | 38 | 40 | 41 | 9 |
| 65 | 38 | 40 | 42 | 9 |
| 65 | 38 | 40 | 43 | 9 |
| 35 | 38 | 65 | 66 | 9 |
| 35 | 38 | 65 | 67 | 9 |
| 35 | 38 | 65 | 93 | 9 |
| 39 | 38 | 65 | 66 | 9 |
| 39 | 38 | 65 | 67 | 9 |
| 39 | 38 | 65 | 93 | 9 |
| 40 | 38 | 65 | 66 | 9 |
| 40 | 38 | 65 | 67 | 9 |
| 40 | 38 | 65 | 93 | 9 |
| 38 | 40 | 43 | 44 | 9 |
| 38 | 40 | 43 | 45 | 9 |
| 38 | 40 | 43 | 46 | 9 |
| 41 | 40 | 43 | 44 | 9 |
| 41 | 40 | 43 | 45 | 9 |
| 41 | 40 | 43 | 46 | 9 |
| 42 | 40 | 43 | 44 | 9 |
| 42 | 40 | 43 | 45 | 9 |
| 42 | 40 | 43 | 46 | 9 |
| 40 | 43 | 46 | 47 | 9 |
| 40 | 43 | 46 | 48 | 9 |
| 40 | 43 | 46 | 49 | 9 |
| 44 | 43 | 46 | 47 | 9 |
| 44 | 43 | 46 | 48 | 9 |
| 44 | 43 | 46 | 49 | 9 |
| 45 | 43 | 46 | 47 | 9 |
| 45 | 43 | 46 | 48 | 9 |
| 45 | 43 | 46 | 49 | 9 |
| 43 | 46 | 49 | 50 | 9 |
| 43 | 46 | 49 | 51 | 9 |
| 43 | 46 | 49 | 52 | 9 |
| 47 | 46 | 49 | 50 | 9 |
| 47 | 46 | 49 | 51 | 9 |
| 47 | 46 | 49 | 52 | 9 |
| 48 | 46 | 49 | 50 | 9 |
| 48 | 46 | 49 | 51 | 9 |
| 48 | 46 | 49 | 52 | 9 |
| 46 | 49 | 52 | 53 | 9 |
| 46 | 49 | 52 | 54 | 9 |
| 46 | 49 | 52 | 55 | 9 |
| 50 | 49 | 52 | 53 | 9 |
| 50 | 49 | 52 | 54 | 9 |
| 50 | 49 | 52 | 55 | 9 |
| 51 | 49 | 52 | 53 | 9 |
| 51 | 49 | 52 | 54 | 9 |
| 51 | 49 | 52 | 55 | 9 |
| 49 | 52 | 55 | 56 | 9 |
| 49 | 52 | 55 | 57 | 9 |
| 49 | 52 | 55 | 58 | 9 |
| 53 | 52 | 55 | 56 | 9 |
| 53 | 52 | 55 | 57 | 9 |

|    |    |    |    |   |
|----|----|----|----|---|
| 53 | 52 | 55 | 58 | 9 |
| 54 | 52 | 55 | 56 | 9 |
| 54 | 52 | 55 | 57 | 9 |
| 54 | 52 | 55 | 58 | 9 |
| 52 | 55 | 58 | 59 | 9 |
| 52 | 55 | 58 | 60 | 9 |
| 52 | 55 | 58 | 61 | 9 |
| 56 | 55 | 58 | 59 | 9 |
| 56 | 55 | 58 | 60 | 9 |
| 56 | 55 | 58 | 61 | 9 |
| 57 | 55 | 58 | 59 | 9 |
| 57 | 55 | 58 | 60 | 9 |
| 57 | 55 | 58 | 61 | 9 |
| 55 | 58 | 61 | 62 | 9 |
| 55 | 58 | 61 | 63 | 9 |
| 55 | 58 | 61 | 64 | 9 |
| 59 | 58 | 61 | 62 | 9 |
| 59 | 58 | 61 | 63 | 9 |
| 59 | 58 | 61 | 64 | 9 |
| 60 | 58 | 61 | 62 | 9 |
| 60 | 58 | 61 | 63 | 9 |
| 60 | 58 | 61 | 64 | 9 |
| 38 | 65 | 67 | 68 | 9 |
| 38 | 65 | 67 | 69 | 9 |
| 66 | 65 | 67 | 68 | 9 |
| 66 | 65 | 67 | 69 | 9 |
| 93 | 65 | 67 | 68 | 9 |
| 93 | 65 | 67 | 69 | 9 |
| 38 | 65 | 93 | 94 | 9 |
| 38 | 65 | 93 | 95 | 9 |
| 38 | 65 | 93 | 98 | 9 |
| 66 | 65 | 93 | 94 | 9 |
| 66 | 65 | 93 | 95 | 9 |
| 66 | 65 | 93 | 98 | 9 |
| 67 | 65 | 93 | 94 | 9 |
| 67 | 65 | 93 | 95 | 9 |
| 67 | 65 | 93 | 98 | 9 |
| 65 | 67 | 69 | 70 | 9 |
| 65 | 67 | 69 | 71 | 9 |
| 68 | 67 | 69 | 70 | 9 |
| 68 | 67 | 69 | 71 | 9 |
| 67 | 69 | 71 | 72 | 9 |
| 67 | 69 | 71 | 73 | 9 |
| 67 | 69 | 71 | 74 | 9 |
| 70 | 69 | 71 | 72 | 9 |
| 70 | 69 | 71 | 73 | 9 |
| 70 | 69 | 71 | 74 | 9 |
| 69 | 71 | 74 | 75 | 9 |
| 69 | 71 | 74 | 76 | 9 |
| 69 | 71 | 74 | 77 | 9 |
| 72 | 71 | 74 | 75 | 9 |
| 72 | 71 | 74 | 76 | 9 |
| 72 | 71 | 74 | 77 | 9 |
| 73 | 71 | 74 | 75 | 9 |

|    |    |    |    |   |
|----|----|----|----|---|
| 73 | 71 | 74 | 76 | 9 |
| 73 | 71 | 74 | 77 | 9 |
| 71 | 74 | 77 | 78 | 9 |
| 71 | 74 | 77 | 79 | 9 |
| 71 | 74 | 77 | 80 | 9 |
| 75 | 74 | 77 | 78 | 9 |
| 75 | 74 | 77 | 79 | 9 |
| 75 | 74 | 77 | 80 | 9 |
| 76 | 74 | 77 | 78 | 9 |
| 76 | 74 | 77 | 79 | 9 |
| 76 | 74 | 77 | 80 | 9 |
| 74 | 77 | 80 | 81 | 9 |
| 74 | 77 | 80 | 85 | 9 |
| 74 | 77 | 80 | 89 | 9 |
| 78 | 77 | 80 | 81 | 9 |
| 78 | 77 | 80 | 85 | 9 |
| 78 | 77 | 80 | 89 | 9 |
| 79 | 77 | 80 | 81 | 9 |
| 79 | 77 | 80 | 85 | 9 |
| 79 | 77 | 80 | 89 | 9 |
| 77 | 80 | 81 | 82 | 9 |
| 77 | 80 | 81 | 83 | 9 |
| 77 | 80 | 81 | 84 | 9 |
| 85 | 80 | 81 | 82 | 9 |
| 85 | 80 | 81 | 83 | 9 |
| 85 | 80 | 81 | 84 | 9 |
| 89 | 80 | 81 | 82 | 9 |
| 89 | 80 | 81 | 83 | 9 |
| 89 | 80 | 81 | 84 | 9 |
| 77 | 80 | 85 | 86 | 9 |
| 77 | 80 | 85 | 87 | 9 |
| 77 | 80 | 85 | 88 | 9 |
| 81 | 80 | 85 | 86 | 9 |
| 81 | 80 | 85 | 87 | 9 |
| 81 | 80 | 85 | 88 | 9 |
| 89 | 80 | 85 | 86 | 9 |
| 89 | 80 | 85 | 87 | 9 |
| 89 | 80 | 85 | 88 | 9 |
| 77 | 80 | 89 | 90 | 9 |
| 77 | 80 | 89 | 91 | 9 |
| 77 | 80 | 89 | 92 | 9 |
| 81 | 80 | 89 | 90 | 9 |
| 81 | 80 | 89 | 91 | 9 |
| 81 | 80 | 89 | 92 | 9 |
| 85 | 80 | 89 | 90 | 9 |
| 85 | 80 | 89 | 91 | 9 |
| 85 | 80 | 89 | 92 | 9 |
| 65 | 93 | 95 | 96 | 9 |
| 65 | 93 | 95 | 97 | 9 |
| 94 | 93 | 95 | 96 | 9 |
| 94 | 93 | 95 | 97 | 9 |
| 98 | 93 | 95 | 96 | 9 |
| 98 | 93 | 95 | 97 | 9 |
| 65 | 93 | 98 | 99 | 9 |

|     |     |     |     |   |
|-----|-----|-----|-----|---|
| 65  | 93  | 98  | 100 | 9 |
| 65  | 93  | 98  | 101 | 9 |
| 94  | 93  | 98  | 99  | 9 |
| 94  | 93  | 98  | 100 | 9 |
| 94  | 93  | 98  | 101 | 9 |
| 95  | 93  | 98  | 99  | 9 |
| 95  | 93  | 98  | 100 | 9 |
| 95  | 93  | 98  | 101 | 9 |
| 93  | 98  | 101 | 102 | 9 |
| 93  | 98  | 101 | 103 | 9 |
| 93  | 98  | 101 | 128 | 9 |
| 99  | 98  | 101 | 102 | 9 |
| 99  | 98  | 101 | 103 | 9 |
| 99  | 98  | 101 | 128 | 9 |
| 100 | 98  | 101 | 102 | 9 |
| 100 | 98  | 101 | 103 | 9 |
| 100 | 98  | 101 | 128 | 9 |
| 98  | 101 | 103 | 104 | 9 |
| 98  | 101 | 103 | 105 | 9 |
| 98  | 101 | 103 | 106 | 9 |
| 102 | 101 | 103 | 104 | 9 |
| 102 | 101 | 103 | 105 | 9 |
| 102 | 101 | 103 | 106 | 9 |
| 128 | 101 | 103 | 104 | 9 |
| 128 | 101 | 103 | 105 | 9 |
| 128 | 101 | 103 | 106 | 9 |
| 98  | 101 | 128 | 129 | 9 |
| 98  | 101 | 128 | 130 | 9 |
| 98  | 101 | 128 | 156 | 9 |
| 102 | 101 | 128 | 129 | 9 |
| 102 | 101 | 128 | 130 | 9 |
| 102 | 101 | 128 | 156 | 9 |
| 103 | 101 | 128 | 129 | 9 |
| 103 | 101 | 128 | 130 | 9 |
| 103 | 101 | 128 | 156 | 9 |
| 101 | 103 | 106 | 107 | 9 |
| 101 | 103 | 106 | 108 | 9 |
| 101 | 103 | 106 | 109 | 9 |
| 104 | 103 | 106 | 107 | 9 |
| 104 | 103 | 106 | 108 | 9 |
| 104 | 103 | 106 | 109 | 9 |
| 105 | 103 | 106 | 107 | 9 |
| 105 | 103 | 106 | 108 | 9 |
| 105 | 103 | 106 | 109 | 9 |
| 103 | 106 | 109 | 110 | 9 |
| 103 | 106 | 109 | 111 | 9 |
| 103 | 106 | 109 | 112 | 9 |
| 107 | 106 | 109 | 110 | 9 |
| 107 | 106 | 109 | 111 | 9 |
| 107 | 106 | 109 | 112 | 9 |
| 108 | 106 | 109 | 110 | 9 |
| 108 | 106 | 109 | 111 | 9 |
| 108 | 106 | 109 | 112 | 9 |
| 106 | 109 | 112 | 113 | 9 |

|     |     |     |     |   |
|-----|-----|-----|-----|---|
| 106 | 109 | 112 | 114 | 9 |
| 106 | 109 | 112 | 115 | 9 |
| 110 | 109 | 112 | 113 | 9 |
| 110 | 109 | 112 | 114 | 9 |
| 110 | 109 | 112 | 115 | 9 |
| 111 | 109 | 112 | 113 | 9 |
| 111 | 109 | 112 | 114 | 9 |
| 111 | 109 | 112 | 115 | 9 |
| 109 | 112 | 115 | 116 | 9 |
| 109 | 112 | 115 | 117 | 9 |
| 109 | 112 | 115 | 118 | 9 |
| 113 | 112 | 115 | 116 | 9 |
| 113 | 112 | 115 | 117 | 9 |
| 113 | 112 | 115 | 118 | 9 |
| 114 | 112 | 115 | 116 | 9 |
| 114 | 112 | 115 | 117 | 9 |
| 114 | 112 | 115 | 118 | 9 |
| 112 | 115 | 118 | 119 | 9 |
| 112 | 115 | 118 | 120 | 9 |
| 112 | 115 | 118 | 121 | 9 |
| 116 | 115 | 118 | 119 | 9 |
| 116 | 115 | 118 | 120 | 9 |
| 116 | 115 | 118 | 121 | 9 |
| 117 | 115 | 118 | 119 | 9 |
| 117 | 115 | 118 | 120 | 9 |
| 117 | 115 | 118 | 121 | 9 |
| 115 | 118 | 121 | 122 | 9 |
| 115 | 118 | 121 | 123 | 9 |
| 115 | 118 | 121 | 124 | 9 |
| 119 | 118 | 121 | 122 | 9 |
| 119 | 118 | 121 | 123 | 9 |
| 119 | 118 | 121 | 124 | 9 |
| 120 | 118 | 121 | 122 | 9 |
| 120 | 118 | 121 | 123 | 9 |
| 120 | 118 | 121 | 124 | 9 |
| 118 | 121 | 124 | 125 | 9 |
| 118 | 121 | 124 | 126 | 9 |
| 118 | 121 | 124 | 127 | 9 |
| 122 | 121 | 124 | 125 | 9 |
| 122 | 121 | 124 | 126 | 9 |
| 122 | 121 | 124 | 127 | 9 |
| 123 | 121 | 124 | 125 | 9 |
| 123 | 121 | 124 | 126 | 9 |
| 123 | 121 | 124 | 127 | 9 |
| 101 | 128 | 130 | 131 | 9 |
| 101 | 128 | 130 | 132 | 9 |
| 129 | 128 | 130 | 131 | 9 |
| 129 | 128 | 130 | 132 | 9 |
| 156 | 128 | 130 | 131 | 9 |
| 156 | 128 | 130 | 132 | 9 |
| 101 | 128 | 156 | 157 | 9 |
| 101 | 128 | 156 | 158 | 9 |
| 101 | 128 | 156 | 161 | 9 |
| 129 | 128 | 156 | 157 | 9 |

|     |     |     |     |   |
|-----|-----|-----|-----|---|
| 129 | 128 | 156 | 158 | 9 |
| 129 | 128 | 156 | 161 | 9 |
| 130 | 128 | 156 | 157 | 9 |
| 130 | 128 | 156 | 158 | 9 |
| 130 | 128 | 156 | 161 | 9 |
| 128 | 130 | 132 | 133 | 9 |
| 128 | 130 | 132 | 134 | 9 |
| 131 | 130 | 132 | 133 | 9 |
| 131 | 130 | 132 | 134 | 9 |
| 130 | 132 | 134 | 135 | 9 |
| 130 | 132 | 134 | 136 | 9 |
| 130 | 132 | 134 | 137 | 9 |
| 133 | 132 | 134 | 135 | 9 |
| 133 | 132 | 134 | 136 | 9 |
| 133 | 132 | 134 | 137 | 9 |
| 132 | 134 | 137 | 138 | 9 |
| 132 | 134 | 137 | 139 | 9 |
| 132 | 134 | 137 | 140 | 9 |
| 135 | 134 | 137 | 138 | 9 |
| 135 | 134 | 137 | 139 | 9 |
| 135 | 134 | 137 | 140 | 9 |
| 136 | 134 | 137 | 138 | 9 |
| 136 | 134 | 137 | 139 | 9 |
| 136 | 134 | 137 | 140 | 9 |
| 134 | 137 | 140 | 141 | 9 |
| 134 | 137 | 140 | 142 | 9 |
| 134 | 137 | 140 | 143 | 9 |
| 138 | 137 | 140 | 141 | 9 |
| 138 | 137 | 140 | 142 | 9 |
| 138 | 137 | 140 | 143 | 9 |
| 139 | 137 | 140 | 141 | 9 |
| 139 | 137 | 140 | 142 | 9 |
| 139 | 137 | 140 | 143 | 9 |
| 137 | 140 | 143 | 144 | 9 |
| 137 | 140 | 143 | 148 | 9 |
| 137 | 140 | 143 | 152 | 9 |
| 141 | 140 | 143 | 144 | 9 |
| 141 | 140 | 143 | 148 | 9 |
| 141 | 140 | 143 | 152 | 9 |
| 142 | 140 | 143 | 144 | 9 |
| 142 | 140 | 143 | 148 | 9 |
| 142 | 140 | 143 | 152 | 9 |
| 140 | 143 | 144 | 145 | 9 |
| 140 | 143 | 144 | 146 | 9 |
| 140 | 143 | 144 | 147 | 9 |
| 148 | 143 | 144 | 145 | 9 |
| 148 | 143 | 144 | 146 | 9 |
| 148 | 143 | 144 | 147 | 9 |
| 152 | 143 | 144 | 145 | 9 |
| 152 | 143 | 144 | 146 | 9 |
| 152 | 143 | 144 | 147 | 9 |
| 140 | 143 | 148 | 149 | 9 |
| 140 | 143 | 148 | 150 | 9 |
| 140 | 143 | 148 | 151 | 9 |

|     |     |     |     |   |
|-----|-----|-----|-----|---|
| 144 | 143 | 148 | 149 | 9 |
| 144 | 143 | 148 | 150 | 9 |
| 144 | 143 | 148 | 151 | 9 |
| 152 | 143 | 148 | 149 | 9 |
| 152 | 143 | 148 | 150 | 9 |
| 152 | 143 | 148 | 151 | 9 |
| 140 | 143 | 152 | 153 | 9 |
| 140 | 143 | 152 | 154 | 9 |
| 140 | 143 | 152 | 155 | 9 |
| 144 | 143 | 152 | 153 | 9 |
| 144 | 143 | 152 | 154 | 9 |
| 144 | 143 | 152 | 155 | 9 |
| 148 | 143 | 152 | 153 | 9 |
| 148 | 143 | 152 | 154 | 9 |
| 148 | 143 | 152 | 155 | 9 |
| 128 | 156 | 158 | 159 | 9 |
| 128 | 156 | 158 | 160 | 9 |
| 157 | 156 | 158 | 159 | 9 |
| 157 | 156 | 158 | 160 | 9 |
| 161 | 156 | 158 | 159 | 9 |
| 161 | 156 | 158 | 160 | 9 |
| 128 | 156 | 161 | 162 | 9 |
| 128 | 156 | 161 | 163 | 9 |
| 128 | 156 | 161 | 164 | 9 |
| 157 | 156 | 161 | 162 | 9 |
| 157 | 156 | 161 | 163 | 9 |
| 157 | 156 | 161 | 164 | 9 |
| 158 | 156 | 161 | 162 | 9 |
| 158 | 156 | 161 | 163 | 9 |
| 158 | 156 | 161 | 164 | 9 |
| 156 | 161 | 164 | 165 | 9 |
| 156 | 161 | 164 | 166 | 9 |
| 156 | 161 | 164 | 191 | 9 |
| 162 | 161 | 164 | 165 | 9 |
| 162 | 161 | 164 | 166 | 9 |
| 162 | 161 | 164 | 191 | 9 |
| 163 | 161 | 164 | 165 | 9 |
| 163 | 161 | 164 | 166 | 9 |
| 163 | 161 | 164 | 191 | 9 |
| 161 | 164 | 166 | 167 | 9 |
| 161 | 164 | 166 | 168 | 9 |
| 161 | 164 | 166 | 169 | 9 |
| 165 | 164 | 166 | 167 | 9 |
| 165 | 164 | 166 | 168 | 9 |
| 165 | 164 | 166 | 169 | 9 |
| 191 | 164 | 166 | 167 | 9 |
| 191 | 164 | 166 | 168 | 9 |
| 191 | 164 | 166 | 169 | 9 |
| 161 | 164 | 191 | 192 | 9 |
| 161 | 164 | 191 | 193 | 9 |
| 161 | 164 | 191 | 219 | 9 |
| 165 | 164 | 191 | 192 | 9 |
| 165 | 164 | 191 | 193 | 9 |
| 165 | 164 | 191 | 219 | 9 |



|     |     |     |     |   |
|-----|-----|-----|-----|---|
| 166 | 164 | 191 | 192 | 9 |
| 166 | 164 | 191 | 193 | 9 |
| 166 | 164 | 191 | 219 | 9 |
| 164 | 166 | 169 | 170 | 9 |
| 164 | 166 | 169 | 171 | 9 |
| 164 | 166 | 169 | 172 | 9 |
| 167 | 166 | 169 | 170 | 9 |
| 167 | 166 | 169 | 171 | 9 |
| 167 | 166 | 169 | 172 | 9 |
| 168 | 166 | 169 | 170 | 9 |
| 168 | 166 | 169 | 171 | 9 |
| 168 | 166 | 169 | 172 | 9 |
| 166 | 169 | 172 | 173 | 9 |
| 166 | 169 | 172 | 174 | 9 |
| 166 | 169 | 172 | 175 | 9 |
| 170 | 169 | 172 | 173 | 9 |
| 170 | 169 | 172 | 174 | 9 |
| 170 | 169 | 172 | 175 | 9 |
| 171 | 169 | 172 | 173 | 9 |
| 171 | 169 | 172 | 174 | 9 |
| 171 | 169 | 172 | 175 | 9 |
| 169 | 172 | 175 | 176 | 9 |
| 169 | 172 | 175 | 177 | 9 |
| 169 | 172 | 175 | 178 | 9 |
| 173 | 172 | 175 | 176 | 9 |
| 173 | 172 | 175 | 177 | 9 |
| 173 | 172 | 175 | 178 | 9 |
| 174 | 172 | 175 | 176 | 9 |
| 174 | 172 | 175 | 177 | 9 |
| 174 | 172 | 175 | 178 | 9 |
| 172 | 175 | 178 | 179 | 9 |
| 172 | 175 | 178 | 180 | 9 |
| 172 | 175 | 178 | 181 | 9 |
| 176 | 175 | 178 | 179 | 9 |
| 176 | 175 | 178 | 180 | 9 |
| 176 | 175 | 178 | 181 | 9 |
| 177 | 175 | 178 | 179 | 9 |
| 177 | 175 | 178 | 180 | 9 |
| 177 | 175 | 178 | 181 | 9 |
| 175 | 178 | 181 | 182 | 9 |
| 175 | 178 | 181 | 183 | 9 |
| 175 | 178 | 181 | 184 | 9 |
| 179 | 178 | 181 | 182 | 9 |
| 179 | 178 | 181 | 183 | 9 |
| 179 | 178 | 181 | 184 | 9 |
| 180 | 178 | 181 | 182 | 9 |
| 180 | 178 | 181 | 183 | 9 |
| 180 | 178 | 181 | 184 | 9 |
| 178 | 181 | 184 | 185 | 9 |
| 178 | 181 | 184 | 186 | 9 |
| 178 | 181 | 184 | 187 | 9 |
| 182 | 181 | 184 | 185 | 9 |
| 182 | 181 | 184 | 186 | 9 |
| 182 | 181 | 184 | 187 | 9 |

|     |     |     |     |   |
|-----|-----|-----|-----|---|
| 183 | 181 | 184 | 185 | 9 |
| 183 | 181 | 184 | 186 | 9 |
| 183 | 181 | 184 | 187 | 9 |
| 181 | 184 | 187 | 188 | 9 |
| 181 | 184 | 187 | 189 | 9 |
| 181 | 184 | 187 | 190 | 9 |
| 185 | 184 | 187 | 188 | 9 |
| 185 | 184 | 187 | 189 | 9 |
| 185 | 184 | 187 | 190 | 9 |
| 186 | 184 | 187 | 188 | 9 |
| 186 | 184 | 187 | 189 | 9 |
| 186 | 184 | 187 | 190 | 9 |
| 164 | 191 | 193 | 194 | 9 |
| 164 | 191 | 193 | 195 | 9 |
| 192 | 191 | 193 | 194 | 9 |
| 192 | 191 | 193 | 195 | 9 |
| 219 | 191 | 193 | 194 | 9 |
| 219 | 191 | 193 | 195 | 9 |
| 164 | 191 | 219 | 220 | 9 |
| 164 | 191 | 219 | 221 | 9 |
| 164 | 191 | 219 | 224 | 9 |
| 192 | 191 | 219 | 220 | 9 |
| 192 | 191 | 219 | 221 | 9 |
| 192 | 191 | 219 | 224 | 9 |
| 193 | 191 | 219 | 220 | 9 |
| 193 | 191 | 219 | 221 | 9 |
| 193 | 191 | 219 | 224 | 9 |
| 191 | 193 | 195 | 196 | 9 |
| 191 | 193 | 195 | 197 | 9 |
| 194 | 193 | 195 | 196 | 9 |
| 194 | 193 | 195 | 197 | 9 |
| 193 | 195 | 197 | 198 | 9 |
| 193 | 195 | 197 | 199 | 9 |
| 193 | 195 | 197 | 200 | 9 |
| 196 | 195 | 197 | 198 | 9 |
| 196 | 195 | 197 | 199 | 9 |
| 196 | 195 | 197 | 200 | 9 |
| 195 | 197 | 200 | 201 | 9 |
| 195 | 197 | 200 | 202 | 9 |
| 195 | 197 | 200 | 203 | 9 |
| 198 | 197 | 200 | 201 | 9 |
| 198 | 197 | 200 | 202 | 9 |
| 198 | 197 | 200 | 203 | 9 |
| 199 | 197 | 200 | 201 | 9 |
| 199 | 197 | 200 | 202 | 9 |
| 199 | 197 | 200 | 203 | 9 |
| 197 | 200 | 203 | 204 | 9 |
| 197 | 200 | 203 | 205 | 9 |
| 197 | 200 | 203 | 206 | 9 |
| 201 | 200 | 203 | 204 | 9 |
| 201 | 200 | 203 | 205 | 9 |
| 201 | 200 | 203 | 206 | 9 |
| 202 | 200 | 203 | 204 | 9 |
| 202 | 200 | 203 | 205 | 9 |

|     |     |     |     |   |
|-----|-----|-----|-----|---|
| 202 | 200 | 203 | 206 | 9 |
| 200 | 203 | 206 | 207 | 9 |
| 200 | 203 | 206 | 211 | 9 |
| 200 | 203 | 206 | 215 | 9 |
| 204 | 203 | 206 | 207 | 9 |
| 204 | 203 | 206 | 211 | 9 |
| 204 | 203 | 206 | 215 | 9 |
| 205 | 203 | 206 | 207 | 9 |
| 205 | 203 | 206 | 211 | 9 |
| 205 | 203 | 206 | 215 | 9 |
| 203 | 206 | 207 | 208 | 9 |
| 203 | 206 | 207 | 209 | 9 |
| 203 | 206 | 207 | 210 | 9 |
| 211 | 206 | 207 | 208 | 9 |
| 211 | 206 | 207 | 209 | 9 |
| 211 | 206 | 207 | 210 | 9 |
| 215 | 206 | 207 | 208 | 9 |
| 215 | 206 | 207 | 209 | 9 |
| 215 | 206 | 207 | 210 | 9 |
| 203 | 206 | 211 | 212 | 9 |
| 203 | 206 | 211 | 213 | 9 |
| 203 | 206 | 211 | 214 | 9 |
| 207 | 206 | 211 | 212 | 9 |
| 207 | 206 | 211 | 213 | 9 |
| 207 | 206 | 211 | 214 | 9 |
| 215 | 206 | 211 | 212 | 9 |
| 215 | 206 | 211 | 213 | 9 |
| 215 | 206 | 211 | 214 | 9 |
| 203 | 206 | 215 | 216 | 9 |
| 203 | 206 | 215 | 217 | 9 |
| 203 | 206 | 215 | 218 | 9 |
| 207 | 206 | 215 | 216 | 9 |
| 207 | 206 | 215 | 217 | 9 |
| 207 | 206 | 215 | 218 | 9 |
| 211 | 206 | 215 | 216 | 9 |
| 211 | 206 | 215 | 217 | 9 |
| 211 | 206 | 215 | 218 | 9 |
| 191 | 219 | 221 | 222 | 9 |
| 191 | 219 | 221 | 223 | 9 |
| 220 | 219 | 221 | 222 | 9 |
| 220 | 219 | 221 | 223 | 9 |
| 224 | 219 | 221 | 222 | 9 |
| 224 | 219 | 221 | 223 | 9 |
| 191 | 219 | 224 | 225 | 9 |
| 191 | 219 | 224 | 226 | 9 |
| 191 | 219 | 224 | 227 | 9 |
| 220 | 219 | 224 | 225 | 9 |
| 220 | 219 | 224 | 226 | 9 |
| 220 | 219 | 224 | 227 | 9 |
| 221 | 219 | 224 | 225 | 9 |
| 221 | 219 | 224 | 226 | 9 |
| 221 | 219 | 224 | 227 | 9 |
| 219 | 224 | 227 | 228 | 9 |
| 219 | 224 | 227 | 229 | 9 |

|     |     |     |     |   |
|-----|-----|-----|-----|---|
| 219 | 224 | 227 | 254 | 9 |
| 225 | 224 | 227 | 228 | 9 |
| 225 | 224 | 227 | 229 | 9 |
| 225 | 224 | 227 | 254 | 9 |
| 226 | 224 | 227 | 228 | 9 |
| 226 | 224 | 227 | 229 | 9 |
| 226 | 224 | 227 | 254 | 9 |
| 224 | 227 | 229 | 230 | 9 |
| 224 | 227 | 229 | 231 | 9 |
| 224 | 227 | 229 | 232 | 9 |
| 228 | 227 | 229 | 230 | 9 |
| 228 | 227 | 229 | 231 | 9 |
| 228 | 227 | 229 | 232 | 9 |
| 254 | 227 | 229 | 230 | 9 |
| 254 | 227 | 229 | 231 | 9 |
| 254 | 227 | 229 | 232 | 9 |
| 224 | 227 | 254 | 255 | 9 |
| 224 | 227 | 254 | 256 | 9 |
| 224 | 227 | 254 | 282 | 9 |
| 228 | 227 | 254 | 255 | 9 |
| 228 | 227 | 254 | 256 | 9 |
| 228 | 227 | 254 | 282 | 9 |
| 229 | 227 | 254 | 255 | 9 |
| 229 | 227 | 254 | 256 | 9 |
| 229 | 227 | 254 | 282 | 9 |
| 227 | 229 | 232 | 233 | 9 |
| 227 | 229 | 232 | 234 | 9 |
| 227 | 229 | 232 | 235 | 9 |
| 230 | 229 | 232 | 233 | 9 |
| 230 | 229 | 232 | 234 | 9 |
| 230 | 229 | 232 | 235 | 9 |
| 231 | 229 | 232 | 233 | 9 |
| 231 | 229 | 232 | 234 | 9 |
| 231 | 229 | 232 | 235 | 9 |
| 229 | 232 | 235 | 236 | 9 |
| 229 | 232 | 235 | 237 | 9 |
| 229 | 232 | 235 | 238 | 9 |
| 233 | 232 | 235 | 236 | 9 |
| 233 | 232 | 235 | 237 | 9 |
| 233 | 232 | 235 | 238 | 9 |
| 234 | 232 | 235 | 236 | 9 |
| 234 | 232 | 235 | 237 | 9 |
| 234 | 232 | 235 | 238 | 9 |
| 232 | 235 | 238 | 239 | 9 |
| 232 | 235 | 238 | 240 | 9 |
| 232 | 235 | 238 | 241 | 9 |
| 236 | 235 | 238 | 239 | 9 |
| 236 | 235 | 238 | 240 | 9 |
| 236 | 235 | 238 | 241 | 9 |
| 237 | 235 | 238 | 239 | 9 |
| 237 | 235 | 238 | 240 | 9 |
| 237 | 235 | 238 | 241 | 9 |
| 235 | 238 | 241 | 242 | 9 |
| 235 | 238 | 241 | 243 | 9 |

|     |     |     |     |   |
|-----|-----|-----|-----|---|
| 235 | 238 | 241 | 244 | 9 |
| 239 | 238 | 241 | 242 | 9 |
| 239 | 238 | 241 | 243 | 9 |
| 239 | 238 | 241 | 244 | 9 |
| 240 | 238 | 241 | 242 | 9 |
| 240 | 238 | 241 | 243 | 9 |
| 240 | 238 | 241 | 244 | 9 |
| 238 | 241 | 244 | 245 | 9 |
| 238 | 241 | 244 | 246 | 9 |
| 238 | 241 | 244 | 247 | 9 |
| 242 | 241 | 244 | 245 | 9 |
| 242 | 241 | 244 | 246 | 9 |
| 242 | 241 | 244 | 247 | 9 |
| 243 | 241 | 244 | 245 | 9 |
| 243 | 241 | 244 | 246 | 9 |
| 243 | 241 | 244 | 247 | 9 |
| 241 | 244 | 247 | 248 | 9 |
| 241 | 244 | 247 | 249 | 9 |
| 241 | 244 | 247 | 250 | 9 |
| 245 | 244 | 247 | 248 | 9 |
| 245 | 244 | 247 | 249 | 9 |
| 245 | 244 | 247 | 250 | 9 |
| 246 | 244 | 247 | 248 | 9 |
| 246 | 244 | 247 | 249 | 9 |
| 246 | 244 | 247 | 250 | 9 |
| 244 | 247 | 250 | 251 | 9 |
| 244 | 247 | 250 | 252 | 9 |
| 244 | 247 | 250 | 253 | 9 |
| 248 | 247 | 250 | 251 | 9 |
| 248 | 247 | 250 | 252 | 9 |
| 248 | 247 | 250 | 253 | 9 |
| 249 | 247 | 250 | 251 | 9 |
| 249 | 247 | 250 | 252 | 9 |
| 249 | 247 | 250 | 253 | 9 |
| 227 | 254 | 256 | 257 | 9 |
| 227 | 254 | 256 | 258 | 9 |
| 255 | 254 | 256 | 257 | 9 |
| 255 | 254 | 256 | 258 | 9 |
| 282 | 254 | 256 | 257 | 9 |
| 282 | 254 | 256 | 258 | 9 |
| 227 | 254 | 282 | 283 | 9 |
| 227 | 254 | 282 | 284 | 9 |
| 227 | 254 | 282 | 287 | 9 |
| 255 | 254 | 282 | 283 | 9 |
| 255 | 254 | 282 | 284 | 9 |
| 255 | 254 | 282 | 287 | 9 |
| 256 | 254 | 282 | 283 | 9 |
| 256 | 254 | 282 | 284 | 9 |
| 256 | 254 | 282 | 287 | 9 |
| 254 | 256 | 258 | 259 | 9 |
| 254 | 256 | 258 | 260 | 9 |
| 257 | 256 | 258 | 259 | 9 |
| 257 | 256 | 258 | 260 | 9 |
| 256 | 258 | 260 | 261 | 9 |

|     |     |     |     |   |
|-----|-----|-----|-----|---|
| 256 | 258 | 260 | 262 | 9 |
| 256 | 258 | 260 | 263 | 9 |
| 259 | 258 | 260 | 261 | 9 |
| 259 | 258 | 260 | 262 | 9 |
| 259 | 258 | 260 | 263 | 9 |
| 258 | 260 | 263 | 264 | 9 |
| 258 | 260 | 263 | 265 | 9 |
| 258 | 260 | 263 | 266 | 9 |
| 261 | 260 | 263 | 264 | 9 |
| 261 | 260 | 263 | 265 | 9 |
| 261 | 260 | 263 | 266 | 9 |
| 262 | 260 | 263 | 264 | 9 |
| 262 | 260 | 263 | 265 | 9 |
| 262 | 260 | 263 | 266 | 9 |
| 260 | 263 | 266 | 267 | 9 |
| 260 | 263 | 266 | 268 | 9 |
| 260 | 263 | 266 | 269 | 9 |
| 264 | 263 | 266 | 267 | 9 |
| 264 | 263 | 266 | 268 | 9 |
| 264 | 263 | 266 | 269 | 9 |
| 265 | 263 | 266 | 267 | 9 |
| 265 | 263 | 266 | 268 | 9 |
| 265 | 263 | 266 | 269 | 9 |
| 263 | 266 | 269 | 270 | 9 |
| 263 | 266 | 269 | 274 | 9 |
| 263 | 266 | 269 | 278 | 9 |
| 267 | 266 | 269 | 270 | 9 |
| 267 | 266 | 269 | 274 | 9 |
| 267 | 266 | 269 | 278 | 9 |
| 268 | 266 | 269 | 270 | 9 |
| 268 | 266 | 269 | 274 | 9 |
| 268 | 266 | 269 | 278 | 9 |
| 266 | 269 | 270 | 271 | 9 |
| 266 | 269 | 270 | 272 | 9 |
| 266 | 269 | 270 | 273 | 9 |
| 274 | 269 | 270 | 271 | 9 |
| 274 | 269 | 270 | 272 | 9 |
| 274 | 269 | 270 | 273 | 9 |
| 278 | 269 | 270 | 271 | 9 |
| 278 | 269 | 270 | 272 | 9 |
| 278 | 269 | 270 | 273 | 9 |
| 266 | 269 | 274 | 275 | 9 |
| 266 | 269 | 274 | 276 | 9 |
| 266 | 269 | 274 | 277 | 9 |
| 270 | 269 | 274 | 275 | 9 |
| 270 | 269 | 274 | 276 | 9 |
| 270 | 269 | 274 | 277 | 9 |
| 278 | 269 | 274 | 275 | 9 |
| 278 | 269 | 274 | 276 | 9 |
| 278 | 269 | 274 | 277 | 9 |
| 266 | 269 | 278 | 279 | 9 |
| 266 | 269 | 278 | 280 | 9 |
| 266 | 269 | 278 | 281 | 9 |
| 270 | 269 | 278 | 279 | 9 |

|     |     |     |     |   |
|-----|-----|-----|-----|---|
| 270 | 269 | 278 | 280 | 9 |
| 270 | 269 | 278 | 281 | 9 |
| 274 | 269 | 278 | 279 | 9 |
| 274 | 269 | 278 | 280 | 9 |
| 274 | 269 | 278 | 281 | 9 |
| 254 | 282 | 284 | 285 | 9 |
| 254 | 282 | 284 | 286 | 9 |
| 283 | 282 | 284 | 285 | 9 |
| 283 | 282 | 284 | 286 | 9 |
| 287 | 282 | 284 | 285 | 9 |
| 287 | 282 | 284 | 286 | 9 |
| 254 | 282 | 287 | 288 | 9 |
| 254 | 282 | 287 | 289 | 9 |
| 254 | 282 | 287 | 290 | 9 |
| 283 | 282 | 287 | 288 | 9 |
| 283 | 282 | 287 | 289 | 9 |
| 283 | 282 | 287 | 290 | 9 |
| 284 | 282 | 287 | 288 | 9 |
| 284 | 282 | 287 | 289 | 9 |
| 284 | 282 | 287 | 290 | 9 |
| 282 | 287 | 290 | 291 | 9 |
| 282 | 287 | 290 | 292 | 9 |
| 282 | 287 | 290 | 317 | 9 |
| 288 | 287 | 290 | 291 | 9 |
| 288 | 287 | 290 | 292 | 9 |
| 288 | 287 | 290 | 317 | 9 |
| 289 | 287 | 290 | 291 | 9 |
| 289 | 287 | 290 | 292 | 9 |
| 289 | 287 | 290 | 317 | 9 |
| 287 | 290 | 292 | 293 | 9 |
| 287 | 290 | 292 | 294 | 9 |
| 287 | 290 | 292 | 295 | 9 |
| 291 | 290 | 292 | 293 | 9 |
| 291 | 290 | 292 | 294 | 9 |
| 291 | 290 | 292 | 295 | 9 |
| 317 | 290 | 292 | 293 | 9 |
| 317 | 290 | 292 | 294 | 9 |
| 317 | 290 | 292 | 295 | 9 |
| 287 | 290 | 317 | 318 | 9 |
| 287 | 290 | 317 | 319 | 9 |
| 287 | 290 | 317 | 345 | 9 |
| 291 | 290 | 317 | 318 | 9 |
| 291 | 290 | 317 | 319 | 9 |
| 291 | 290 | 317 | 345 | 9 |
| 292 | 290 | 317 | 318 | 9 |
| 292 | 290 | 317 | 319 | 9 |
| 292 | 290 | 317 | 345 | 9 |
| 290 | 292 | 295 | 296 | 9 |
| 290 | 292 | 295 | 297 | 9 |
| 290 | 292 | 295 | 298 | 9 |
| 293 | 292 | 295 | 296 | 9 |
| 293 | 292 | 295 | 297 | 9 |
| 293 | 292 | 295 | 298 | 9 |
| 294 | 292 | 295 | 296 | 9 |

|     |     |     |     |   |
|-----|-----|-----|-----|---|
| 294 | 292 | 295 | 297 | 9 |
| 294 | 292 | 295 | 298 | 9 |
| 292 | 295 | 298 | 299 | 9 |
| 292 | 295 | 298 | 300 | 9 |
| 292 | 295 | 298 | 301 | 9 |
| 296 | 295 | 298 | 299 | 9 |
| 296 | 295 | 298 | 300 | 9 |
| 296 | 295 | 298 | 301 | 9 |
| 297 | 295 | 298 | 299 | 9 |
| 297 | 295 | 298 | 300 | 9 |
| 297 | 295 | 298 | 301 | 9 |
| 295 | 298 | 301 | 302 | 9 |
| 295 | 298 | 301 | 303 | 9 |
| 295 | 298 | 301 | 304 | 9 |
| 299 | 298 | 301 | 302 | 9 |
| 299 | 298 | 301 | 303 | 9 |
| 299 | 298 | 301 | 304 | 9 |
| 300 | 298 | 301 | 302 | 9 |
| 300 | 298 | 301 | 303 | 9 |
| 300 | 298 | 301 | 304 | 9 |
| 298 | 301 | 304 | 305 | 9 |
| 298 | 301 | 304 | 306 | 9 |
| 298 | 301 | 304 | 307 | 9 |
| 302 | 301 | 304 | 305 | 9 |
| 302 | 301 | 304 | 306 | 9 |
| 302 | 301 | 304 | 307 | 9 |
| 303 | 301 | 304 | 305 | 9 |
| 303 | 301 | 304 | 306 | 9 |
| 303 | 301 | 304 | 307 | 9 |
| 301 | 304 | 307 | 308 | 9 |
| 301 | 304 | 307 | 309 | 9 |
| 301 | 304 | 307 | 310 | 9 |
| 305 | 304 | 307 | 308 | 9 |
| 305 | 304 | 307 | 309 | 9 |
| 305 | 304 | 307 | 310 | 9 |
| 306 | 304 | 307 | 308 | 9 |
| 306 | 304 | 307 | 309 | 9 |
| 306 | 304 | 307 | 310 | 9 |
| 304 | 307 | 310 | 311 | 9 |
| 304 | 307 | 310 | 312 | 9 |
| 304 | 307 | 310 | 313 | 9 |
| 308 | 307 | 310 | 311 | 9 |
| 308 | 307 | 310 | 312 | 9 |
| 308 | 307 | 310 | 313 | 9 |
| 309 | 307 | 310 | 311 | 9 |
| 309 | 307 | 310 | 312 | 9 |
| 309 | 307 | 310 | 313 | 9 |
| 307 | 310 | 313 | 314 | 9 |
| 307 | 310 | 313 | 315 | 9 |
| 307 | 310 | 313 | 316 | 9 |
| 311 | 310 | 313 | 314 | 9 |
| 311 | 310 | 313 | 315 | 9 |
| 311 | 310 | 313 | 316 | 9 |
| 312 | 310 | 313 | 314 | 9 |



|     |     |     |     |   |
|-----|-----|-----|-----|---|
| 312 | 310 | 313 | 315 | 9 |
| 312 | 310 | 313 | 316 | 9 |
| 290 | 317 | 319 | 320 | 9 |
| 290 | 317 | 319 | 321 | 9 |
| 318 | 317 | 319 | 320 | 9 |
| 318 | 317 | 319 | 321 | 9 |
| 345 | 317 | 319 | 320 | 9 |
| 345 | 317 | 319 | 321 | 9 |
| 290 | 317 | 345 | 346 | 9 |
| 290 | 317 | 345 | 347 | 9 |
| 290 | 317 | 345 | 350 | 9 |
| 318 | 317 | 345 | 346 | 9 |
| 318 | 317 | 345 | 347 | 9 |
| 318 | 317 | 345 | 350 | 9 |
| 319 | 317 | 345 | 346 | 9 |
| 319 | 317 | 345 | 347 | 9 |
| 319 | 317 | 345 | 350 | 9 |
| 317 | 319 | 321 | 322 | 9 |
| 317 | 319 | 321 | 323 | 9 |
| 320 | 319 | 321 | 322 | 9 |
| 320 | 319 | 321 | 323 | 9 |
| 319 | 321 | 323 | 324 | 9 |
| 319 | 321 | 323 | 325 | 9 |
| 319 | 321 | 323 | 326 | 9 |
| 322 | 321 | 323 | 324 | 9 |
| 322 | 321 | 323 | 325 | 9 |
| 322 | 321 | 323 | 326 | 9 |
| 321 | 323 | 326 | 327 | 9 |
| 321 | 323 | 326 | 328 | 9 |
| 321 | 323 | 326 | 329 | 9 |
| 324 | 323 | 326 | 327 | 9 |
| 324 | 323 | 326 | 328 | 9 |
| 324 | 323 | 326 | 329 | 9 |
| 325 | 323 | 326 | 327 | 9 |
| 325 | 323 | 326 | 328 | 9 |
| 325 | 323 | 326 | 329 | 9 |
| 323 | 326 | 329 | 330 | 9 |
| 323 | 326 | 329 | 331 | 9 |
| 323 | 326 | 329 | 332 | 9 |
| 327 | 326 | 329 | 330 | 9 |
| 327 | 326 | 329 | 331 | 9 |
| 327 | 326 | 329 | 332 | 9 |
| 328 | 326 | 329 | 330 | 9 |
| 328 | 326 | 329 | 331 | 9 |
| 328 | 326 | 329 | 332 | 9 |
| 326 | 329 | 332 | 333 | 9 |
| 326 | 329 | 332 | 337 | 9 |
| 326 | 329 | 332 | 341 | 9 |
| 330 | 329 | 332 | 333 | 9 |
| 330 | 329 | 332 | 337 | 9 |
| 330 | 329 | 332 | 341 | 9 |
| 331 | 329 | 332 | 333 | 9 |
| 331 | 329 | 332 | 337 | 9 |
| 331 | 329 | 332 | 341 | 9 |

|     |     |     |     |   |
|-----|-----|-----|-----|---|
| 329 | 332 | 333 | 334 | 9 |
| 329 | 332 | 333 | 335 | 9 |
| 329 | 332 | 333 | 336 | 9 |
| 337 | 332 | 333 | 334 | 9 |
| 337 | 332 | 333 | 335 | 9 |
| 337 | 332 | 333 | 336 | 9 |
| 341 | 332 | 333 | 334 | 9 |
| 341 | 332 | 333 | 335 | 9 |
| 341 | 332 | 333 | 336 | 9 |
| 329 | 332 | 337 | 338 | 9 |
| 329 | 332 | 337 | 339 | 9 |
| 329 | 332 | 337 | 340 | 9 |
| 333 | 332 | 337 | 338 | 9 |
| 333 | 332 | 337 | 339 | 9 |
| 333 | 332 | 337 | 340 | 9 |
| 341 | 332 | 337 | 338 | 9 |
| 341 | 332 | 337 | 339 | 9 |
| 341 | 332 | 337 | 340 | 9 |
| 329 | 332 | 341 | 342 | 9 |
| 329 | 332 | 341 | 343 | 9 |
| 329 | 332 | 341 | 344 | 9 |
| 333 | 332 | 341 | 342 | 9 |
| 333 | 332 | 341 | 343 | 9 |
| 333 | 332 | 341 | 344 | 9 |
| 337 | 332 | 341 | 342 | 9 |
| 337 | 332 | 341 | 343 | 9 |
| 337 | 332 | 341 | 344 | 9 |
| 317 | 345 | 347 | 348 | 9 |
| 317 | 345 | 347 | 349 | 9 |
| 346 | 345 | 347 | 348 | 9 |
| 346 | 345 | 347 | 349 | 9 |
| 350 | 345 | 347 | 348 | 9 |
| 350 | 345 | 347 | 349 | 9 |
| 317 | 345 | 350 | 351 | 9 |
| 317 | 345 | 350 | 352 | 9 |
| 317 | 345 | 350 | 353 | 9 |
| 346 | 345 | 350 | 351 | 9 |
| 346 | 345 | 350 | 352 | 9 |
| 346 | 345 | 350 | 353 | 9 |
| 347 | 345 | 350 | 351 | 9 |
| 347 | 345 | 350 | 352 | 9 |
| 347 | 345 | 350 | 353 | 9 |
| 345 | 350 | 353 | 354 | 9 |
| 345 | 350 | 353 | 355 | 9 |
| 345 | 350 | 353 | 380 | 9 |
| 351 | 350 | 353 | 354 | 9 |
| 351 | 350 | 353 | 355 | 9 |
| 351 | 350 | 353 | 380 | 9 |
| 352 | 350 | 353 | 354 | 9 |
| 352 | 350 | 353 | 355 | 9 |
| 352 | 350 | 353 | 380 | 9 |
| 350 | 353 | 355 | 356 | 9 |
| 350 | 353 | 355 | 357 | 9 |
| 350 | 353 | 355 | 358 | 9 |

|     |     |     |     |   |
|-----|-----|-----|-----|---|
| 354 | 353 | 355 | 356 | 9 |
| 354 | 353 | 355 | 357 | 9 |
| 354 | 353 | 355 | 358 | 9 |
| 380 | 353 | 355 | 356 | 9 |
| 380 | 353 | 355 | 357 | 9 |
| 380 | 353 | 355 | 358 | 9 |
| 350 | 353 | 380 | 381 | 9 |
| 350 | 353 | 380 | 382 | 9 |
| 350 | 353 | 380 | 408 | 9 |
| 354 | 353 | 380 | 381 | 9 |
| 354 | 353 | 380 | 382 | 9 |
| 354 | 353 | 380 | 408 | 9 |
| 355 | 353 | 380 | 381 | 9 |
| 355 | 353 | 380 | 382 | 9 |
| 355 | 353 | 380 | 408 | 9 |
| 353 | 355 | 358 | 359 | 9 |
| 353 | 355 | 358 | 360 | 9 |
| 353 | 355 | 358 | 361 | 9 |
| 356 | 355 | 358 | 359 | 9 |
| 356 | 355 | 358 | 360 | 9 |
| 356 | 355 | 358 | 361 | 9 |
| 357 | 355 | 358 | 359 | 9 |
| 357 | 355 | 358 | 360 | 9 |
| 357 | 355 | 358 | 361 | 9 |
| 355 | 358 | 361 | 362 | 9 |
| 355 | 358 | 361 | 363 | 9 |
| 355 | 358 | 361 | 364 | 9 |
| 359 | 358 | 361 | 362 | 9 |
| 359 | 358 | 361 | 363 | 9 |
| 359 | 358 | 361 | 364 | 9 |
| 360 | 358 | 361 | 362 | 9 |
| 360 | 358 | 361 | 363 | 9 |
| 360 | 358 | 361 | 364 | 9 |
| 358 | 361 | 364 | 365 | 9 |
| 358 | 361 | 364 | 366 | 9 |
| 358 | 361 | 364 | 367 | 9 |
| 362 | 361 | 364 | 365 | 9 |
| 362 | 361 | 364 | 366 | 9 |
| 362 | 361 | 364 | 367 | 9 |
| 363 | 361 | 364 | 365 | 9 |
| 363 | 361 | 364 | 366 | 9 |
| 363 | 361 | 364 | 367 | 9 |
| 361 | 364 | 367 | 368 | 9 |
| 361 | 364 | 367 | 369 | 9 |
| 361 | 364 | 367 | 370 | 9 |
| 365 | 364 | 367 | 368 | 9 |
| 365 | 364 | 367 | 369 | 9 |
| 365 | 364 | 367 | 370 | 9 |
| 366 | 364 | 367 | 368 | 9 |
| 366 | 364 | 367 | 369 | 9 |
| 366 | 364 | 367 | 370 | 9 |
| 364 | 367 | 370 | 371 | 9 |
| 364 | 367 | 370 | 372 | 9 |
| 364 | 367 | 370 | 373 | 9 |

|     |     |     |     |   |
|-----|-----|-----|-----|---|
| 368 | 367 | 370 | 371 | 9 |
| 368 | 367 | 370 | 372 | 9 |
| 368 | 367 | 370 | 373 | 9 |
| 369 | 367 | 370 | 371 | 9 |
| 369 | 367 | 370 | 372 | 9 |
| 369 | 367 | 370 | 373 | 9 |
| 367 | 370 | 373 | 374 | 9 |
| 367 | 370 | 373 | 375 | 9 |
| 367 | 370 | 373 | 376 | 9 |
| 371 | 370 | 373 | 374 | 9 |
| 371 | 370 | 373 | 375 | 9 |
| 371 | 370 | 373 | 376 | 9 |
| 372 | 370 | 373 | 374 | 9 |
| 372 | 370 | 373 | 375 | 9 |
| 372 | 370 | 373 | 376 | 9 |
| 370 | 373 | 376 | 377 | 9 |
| 370 | 373 | 376 | 378 | 9 |
| 370 | 373 | 376 | 379 | 9 |
| 374 | 373 | 376 | 377 | 9 |
| 374 | 373 | 376 | 378 | 9 |
| 374 | 373 | 376 | 379 | 9 |
| 375 | 373 | 376 | 377 | 9 |
| 375 | 373 | 376 | 378 | 9 |
| 375 | 373 | 376 | 379 | 9 |
| 353 | 380 | 382 | 383 | 9 |
| 353 | 380 | 382 | 384 | 9 |
| 381 | 380 | 382 | 383 | 9 |
| 381 | 380 | 382 | 384 | 9 |
| 408 | 380 | 382 | 383 | 9 |
| 408 | 380 | 382 | 384 | 9 |
| 353 | 380 | 408 | 409 | 9 |
| 353 | 380 | 408 | 410 | 9 |
| 353 | 380 | 408 | 413 | 9 |
| 381 | 380 | 408 | 409 | 9 |
| 381 | 380 | 408 | 410 | 9 |
| 381 | 380 | 408 | 413 | 9 |
| 382 | 380 | 408 | 409 | 9 |
| 382 | 380 | 408 | 410 | 9 |
| 382 | 380 | 408 | 413 | 9 |
| 380 | 382 | 384 | 385 | 9 |
| 380 | 382 | 384 | 386 | 9 |
| 383 | 382 | 384 | 385 | 9 |
| 383 | 382 | 384 | 386 | 9 |
| 382 | 384 | 386 | 387 | 9 |
| 382 | 384 | 386 | 388 | 9 |
| 382 | 384 | 386 | 389 | 9 |
| 385 | 384 | 386 | 387 | 9 |
| 385 | 384 | 386 | 388 | 9 |
| 385 | 384 | 386 | 389 | 9 |
| 384 | 386 | 389 | 390 | 9 |
| 384 | 386 | 389 | 391 | 9 |
| 384 | 386 | 389 | 392 | 9 |
| 387 | 386 | 389 | 390 | 9 |
| 387 | 386 | 389 | 391 | 9 |

|     |     |     |     |   |
|-----|-----|-----|-----|---|
| 387 | 386 | 389 | 392 | 9 |
| 388 | 386 | 389 | 390 | 9 |
| 388 | 386 | 389 | 391 | 9 |
| 388 | 386 | 389 | 392 | 9 |
| 386 | 389 | 392 | 393 | 9 |
| 386 | 389 | 392 | 394 | 9 |
| 386 | 389 | 392 | 395 | 9 |
| 390 | 389 | 392 | 393 | 9 |
| 390 | 389 | 392 | 394 | 9 |
| 390 | 389 | 392 | 395 | 9 |
| 391 | 389 | 392 | 393 | 9 |
| 391 | 389 | 392 | 394 | 9 |
| 391 | 389 | 392 | 395 | 9 |
| 389 | 392 | 395 | 396 | 9 |
| 389 | 392 | 395 | 400 | 9 |
| 389 | 392 | 395 | 404 | 9 |
| 393 | 392 | 395 | 396 | 9 |
| 393 | 392 | 395 | 400 | 9 |
| 393 | 392 | 395 | 404 | 9 |
| 394 | 392 | 395 | 396 | 9 |
| 394 | 392 | 395 | 400 | 9 |
| 394 | 392 | 395 | 404 | 9 |
| 392 | 395 | 396 | 397 | 9 |
| 392 | 395 | 396 | 398 | 9 |
| 392 | 395 | 396 | 399 | 9 |
| 400 | 395 | 396 | 397 | 9 |
| 400 | 395 | 396 | 398 | 9 |
| 400 | 395 | 396 | 399 | 9 |
| 404 | 395 | 396 | 397 | 9 |
| 404 | 395 | 396 | 398 | 9 |
| 404 | 395 | 396 | 399 | 9 |
| 392 | 395 | 400 | 401 | 9 |
| 392 | 395 | 400 | 402 | 9 |
| 392 | 395 | 400 | 403 | 9 |
| 396 | 395 | 400 | 401 | 9 |
| 396 | 395 | 400 | 402 | 9 |
| 396 | 395 | 400 | 403 | 9 |
| 404 | 395 | 400 | 401 | 9 |
| 404 | 395 | 400 | 402 | 9 |
| 404 | 395 | 400 | 403 | 9 |
| 392 | 395 | 404 | 405 | 9 |
| 392 | 395 | 404 | 406 | 9 |
| 392 | 395 | 404 | 407 | 9 |
| 396 | 395 | 404 | 405 | 9 |
| 396 | 395 | 404 | 406 | 9 |
| 396 | 395 | 404 | 407 | 9 |
| 400 | 395 | 404 | 405 | 9 |
| 400 | 395 | 404 | 406 | 9 |
| 400 | 395 | 404 | 407 | 9 |
| 380 | 408 | 410 | 411 | 9 |
| 380 | 408 | 410 | 412 | 9 |
| 409 | 408 | 410 | 411 | 9 |
| 409 | 408 | 410 | 412 | 9 |
| 413 | 408 | 410 | 411 | 9 |

|     |     |     |     |   |
|-----|-----|-----|-----|---|
| 413 | 408 | 410 | 412 | 9 |
| 380 | 408 | 413 | 414 | 9 |
| 380 | 408 | 413 | 415 | 9 |
| 380 | 408 | 413 | 416 | 9 |
| 409 | 408 | 413 | 414 | 9 |
| 409 | 408 | 413 | 415 | 9 |
| 409 | 408 | 413 | 416 | 9 |
| 410 | 408 | 413 | 414 | 9 |
| 410 | 408 | 413 | 415 | 9 |
| 410 | 408 | 413 | 416 | 9 |
| 408 | 413 | 416 | 417 | 9 |
| 408 | 413 | 416 | 418 | 9 |
| 408 | 413 | 416 | 443 | 9 |
| 414 | 413 | 416 | 417 | 9 |
| 414 | 413 | 416 | 418 | 9 |
| 414 | 413 | 416 | 443 | 9 |
| 415 | 413 | 416 | 417 | 9 |
| 415 | 413 | 416 | 418 | 9 |
| 415 | 413 | 416 | 443 | 9 |
| 413 | 416 | 418 | 419 | 9 |
| 413 | 416 | 418 | 420 | 9 |
| 413 | 416 | 418 | 421 | 9 |
| 417 | 416 | 418 | 419 | 9 |
| 417 | 416 | 418 | 420 | 9 |
| 417 | 416 | 418 | 421 | 9 |
| 443 | 416 | 418 | 419 | 9 |
| 443 | 416 | 418 | 420 | 9 |
| 443 | 416 | 418 | 421 | 9 |
| 413 | 416 | 443 | 444 | 9 |
| 413 | 416 | 443 | 445 | 9 |
| 413 | 416 | 443 | 471 | 9 |
| 417 | 416 | 443 | 444 | 9 |
| 417 | 416 | 443 | 445 | 9 |
| 417 | 416 | 443 | 471 | 9 |
| 418 | 416 | 443 | 444 | 9 |
| 418 | 416 | 443 | 445 | 9 |
| 418 | 416 | 443 | 471 | 9 |
| 416 | 418 | 421 | 422 | 9 |
| 416 | 418 | 421 | 423 | 9 |
| 416 | 418 | 421 | 424 | 9 |
| 419 | 418 | 421 | 422 | 9 |
| 419 | 418 | 421 | 423 | 9 |
| 419 | 418 | 421 | 424 | 9 |
| 420 | 418 | 421 | 422 | 9 |
| 420 | 418 | 421 | 423 | 9 |
| 420 | 418 | 421 | 424 | 9 |
| 418 | 421 | 424 | 425 | 9 |
| 418 | 421 | 424 | 426 | 9 |
| 418 | 421 | 424 | 427 | 9 |
| 422 | 421 | 424 | 425 | 9 |
| 422 | 421 | 424 | 426 | 9 |
| 422 | 421 | 424 | 427 | 9 |
| 423 | 421 | 424 | 425 | 9 |
| 423 | 421 | 424 | 426 | 9 |

|     |     |     |     |   |
|-----|-----|-----|-----|---|
| 423 | 421 | 424 | 427 | 9 |
| 421 | 424 | 427 | 428 | 9 |
| 421 | 424 | 427 | 429 | 9 |
| 421 | 424 | 427 | 430 | 9 |
| 425 | 424 | 427 | 428 | 9 |
| 425 | 424 | 427 | 429 | 9 |
| 425 | 424 | 427 | 430 | 9 |
| 426 | 424 | 427 | 428 | 9 |
| 426 | 424 | 427 | 429 | 9 |
| 426 | 424 | 427 | 430 | 9 |
| 424 | 427 | 430 | 431 | 9 |
| 424 | 427 | 430 | 432 | 9 |
| 424 | 427 | 430 | 433 | 9 |
| 428 | 427 | 430 | 431 | 9 |
| 428 | 427 | 430 | 432 | 9 |
| 428 | 427 | 430 | 433 | 9 |
| 429 | 427 | 430 | 431 | 9 |
| 429 | 427 | 430 | 432 | 9 |
| 429 | 427 | 430 | 433 | 9 |
| 427 | 430 | 433 | 434 | 9 |
| 427 | 430 | 433 | 435 | 9 |
| 427 | 430 | 433 | 436 | 9 |
| 431 | 430 | 433 | 434 | 9 |
| 431 | 430 | 433 | 435 | 9 |
| 431 | 430 | 433 | 436 | 9 |
| 432 | 430 | 433 | 434 | 9 |
| 432 | 430 | 433 | 435 | 9 |
| 432 | 430 | 433 | 436 | 9 |
| 430 | 433 | 436 | 437 | 9 |
| 430 | 433 | 436 | 438 | 9 |
| 430 | 433 | 436 | 439 | 9 |
| 434 | 433 | 436 | 437 | 9 |
| 434 | 433 | 436 | 438 | 9 |
| 434 | 433 | 436 | 439 | 9 |
| 435 | 433 | 436 | 437 | 9 |
| 435 | 433 | 436 | 438 | 9 |
| 435 | 433 | 436 | 439 | 9 |
| 433 | 436 | 439 | 440 | 9 |
| 433 | 436 | 439 | 441 | 9 |
| 433 | 436 | 439 | 442 | 9 |
| 437 | 436 | 439 | 440 | 9 |
| 437 | 436 | 439 | 441 | 9 |
| 437 | 436 | 439 | 442 | 9 |
| 438 | 436 | 439 | 440 | 9 |
| 438 | 436 | 439 | 441 | 9 |
| 438 | 436 | 439 | 442 | 9 |
| 416 | 443 | 445 | 446 | 9 |
| 416 | 443 | 445 | 447 | 9 |
| 444 | 443 | 445 | 446 | 9 |
| 444 | 443 | 445 | 447 | 9 |
| 471 | 443 | 445 | 446 | 9 |
| 471 | 443 | 445 | 447 | 9 |
| 416 | 443 | 471 | 472 | 9 |
| 416 | 443 | 471 | 473 | 9 |

|     |     |     |     |   |
|-----|-----|-----|-----|---|
| 416 | 443 | 471 | 476 | 9 |
| 444 | 443 | 471 | 472 | 9 |
| 444 | 443 | 471 | 473 | 9 |
| 444 | 443 | 471 | 476 | 9 |
| 445 | 443 | 471 | 472 | 9 |
| 445 | 443 | 471 | 473 | 9 |
| 445 | 443 | 471 | 476 | 9 |
| 443 | 445 | 447 | 448 | 9 |
| 443 | 445 | 447 | 449 | 9 |
| 446 | 445 | 447 | 448 | 9 |
| 446 | 445 | 447 | 449 | 9 |
| 445 | 447 | 449 | 450 | 9 |
| 445 | 447 | 449 | 451 | 9 |
| 445 | 447 | 449 | 452 | 9 |
| 448 | 447 | 449 | 450 | 9 |
| 448 | 447 | 449 | 451 | 9 |
| 448 | 447 | 449 | 452 | 9 |
| 447 | 449 | 452 | 453 | 9 |
| 447 | 449 | 452 | 454 | 9 |
| 447 | 449 | 452 | 455 | 9 |
| 450 | 449 | 452 | 453 | 9 |
| 450 | 449 | 452 | 454 | 9 |
| 450 | 449 | 452 | 455 | 9 |
| 451 | 449 | 452 | 453 | 9 |
| 451 | 449 | 452 | 454 | 9 |
| 451 | 449 | 452 | 455 | 9 |
| 449 | 452 | 455 | 456 | 9 |
| 449 | 452 | 455 | 457 | 9 |
| 449 | 452 | 455 | 458 | 9 |
| 453 | 452 | 455 | 456 | 9 |
| 453 | 452 | 455 | 457 | 9 |
| 453 | 452 | 455 | 458 | 9 |
| 454 | 452 | 455 | 456 | 9 |
| 454 | 452 | 455 | 457 | 9 |
| 454 | 452 | 455 | 458 | 9 |
| 452 | 455 | 458 | 459 | 9 |
| 452 | 455 | 458 | 463 | 9 |
| 452 | 455 | 458 | 467 | 9 |
| 456 | 455 | 458 | 459 | 9 |
| 456 | 455 | 458 | 463 | 9 |
| 456 | 455 | 458 | 467 | 9 |
| 457 | 455 | 458 | 459 | 9 |
| 457 | 455 | 458 | 463 | 9 |
| 457 | 455 | 458 | 467 | 9 |
| 455 | 458 | 459 | 460 | 9 |
| 455 | 458 | 459 | 461 | 9 |
| 455 | 458 | 459 | 462 | 9 |
| 463 | 458 | 459 | 460 | 9 |
| 463 | 458 | 459 | 461 | 9 |
| 463 | 458 | 459 | 462 | 9 |
| 467 | 458 | 459 | 460 | 9 |
| 467 | 458 | 459 | 461 | 9 |
| 467 | 458 | 459 | 462 | 9 |
| 455 | 458 | 463 | 464 | 9 |



|     |     |     |     |   |
|-----|-----|-----|-----|---|
| 455 | 458 | 463 | 465 | 9 |
| 455 | 458 | 463 | 466 | 9 |
| 459 | 458 | 463 | 464 | 9 |
| 459 | 458 | 463 | 465 | 9 |
| 459 | 458 | 463 | 466 | 9 |
| 467 | 458 | 463 | 464 | 9 |
| 467 | 458 | 463 | 465 | 9 |
| 467 | 458 | 463 | 466 | 9 |
| 455 | 458 | 467 | 468 | 9 |
| 455 | 458 | 467 | 469 | 9 |
| 455 | 458 | 467 | 470 | 9 |
| 459 | 458 | 467 | 468 | 9 |
| 459 | 458 | 467 | 469 | 9 |
| 459 | 458 | 467 | 470 | 9 |
| 463 | 458 | 467 | 468 | 9 |
| 463 | 458 | 467 | 469 | 9 |
| 463 | 458 | 467 | 470 | 9 |
| 443 | 471 | 473 | 474 | 9 |
| 443 | 471 | 473 | 475 | 9 |
| 472 | 471 | 473 | 474 | 9 |
| 472 | 471 | 473 | 475 | 9 |
| 476 | 471 | 473 | 474 | 9 |
| 476 | 471 | 473 | 475 | 9 |
| 443 | 471 | 476 | 477 | 9 |
| 443 | 471 | 476 | 478 | 9 |
| 443 | 471 | 476 | 479 | 9 |
| 472 | 471 | 476 | 477 | 9 |
| 472 | 471 | 476 | 478 | 9 |
| 472 | 471 | 476 | 479 | 9 |
| 473 | 471 | 476 | 477 | 9 |
| 473 | 471 | 476 | 478 | 9 |
| 473 | 471 | 476 | 479 | 9 |
| 471 | 476 | 479 | 480 | 9 |
| 471 | 476 | 479 | 481 | 9 |
| 471 | 476 | 479 | 506 | 9 |
| 477 | 476 | 479 | 480 | 9 |
| 477 | 476 | 479 | 481 | 9 |
| 477 | 476 | 479 | 506 | 9 |
| 478 | 476 | 479 | 480 | 9 |
| 478 | 476 | 479 | 481 | 9 |
| 478 | 476 | 479 | 506 | 9 |
| 476 | 479 | 481 | 482 | 9 |
| 476 | 479 | 481 | 483 | 9 |
| 476 | 479 | 481 | 484 | 9 |
| 480 | 479 | 481 | 482 | 9 |
| 480 | 479 | 481 | 483 | 9 |
| 480 | 479 | 481 | 484 | 9 |
| 506 | 479 | 481 | 482 | 9 |
| 506 | 479 | 481 | 483 | 9 |
| 506 | 479 | 481 | 484 | 9 |
| 476 | 479 | 506 | 507 | 9 |
| 476 | 479 | 506 | 508 | 9 |
| 476 | 479 | 506 | 534 | 9 |
| 480 | 479 | 506 | 507 | 9 |

|     |     |     |     |   |
|-----|-----|-----|-----|---|
| 480 | 479 | 506 | 508 | 9 |
| 480 | 479 | 506 | 534 | 9 |
| 481 | 479 | 506 | 507 | 9 |
| 481 | 479 | 506 | 508 | 9 |
| 481 | 479 | 506 | 534 | 9 |
| 479 | 481 | 484 | 485 | 9 |
| 479 | 481 | 484 | 486 | 9 |
| 479 | 481 | 484 | 487 | 9 |
| 482 | 481 | 484 | 485 | 9 |
| 482 | 481 | 484 | 486 | 9 |
| 482 | 481 | 484 | 487 | 9 |
| 483 | 481 | 484 | 485 | 9 |
| 483 | 481 | 484 | 486 | 9 |
| 483 | 481 | 484 | 487 | 9 |
| 481 | 484 | 487 | 488 | 9 |
| 481 | 484 | 487 | 489 | 9 |
| 481 | 484 | 487 | 490 | 9 |
| 485 | 484 | 487 | 488 | 9 |
| 485 | 484 | 487 | 489 | 9 |
| 485 | 484 | 487 | 490 | 9 |
| 486 | 484 | 487 | 488 | 9 |
| 486 | 484 | 487 | 489 | 9 |
| 486 | 484 | 487 | 490 | 9 |
| 484 | 487 | 490 | 491 | 9 |
| 484 | 487 | 490 | 492 | 9 |
| 484 | 487 | 490 | 493 | 9 |
| 488 | 487 | 490 | 491 | 9 |
| 488 | 487 | 490 | 492 | 9 |
| 488 | 487 | 490 | 493 | 9 |
| 489 | 487 | 490 | 491 | 9 |
| 489 | 487 | 490 | 492 | 9 |
| 489 | 487 | 490 | 493 | 9 |
| 487 | 490 | 493 | 494 | 9 |
| 487 | 490 | 493 | 495 | 9 |
| 487 | 490 | 493 | 496 | 9 |
| 491 | 490 | 493 | 494 | 9 |
| 491 | 490 | 493 | 495 | 9 |
| 491 | 490 | 493 | 496 | 9 |
| 492 | 490 | 493 | 494 | 9 |
| 492 | 490 | 493 | 495 | 9 |
| 492 | 490 | 493 | 496 | 9 |
| 490 | 493 | 496 | 497 | 9 |
| 490 | 493 | 496 | 498 | 9 |
| 490 | 493 | 496 | 499 | 9 |
| 494 | 493 | 496 | 497 | 9 |
| 494 | 493 | 496 | 498 | 9 |
| 494 | 493 | 496 | 499 | 9 |
| 495 | 493 | 496 | 497 | 9 |
| 495 | 493 | 496 | 498 | 9 |
| 495 | 493 | 496 | 499 | 9 |
| 493 | 496 | 499 | 500 | 9 |
| 493 | 496 | 499 | 501 | 9 |
| 493 | 496 | 499 | 502 | 9 |
| 497 | 496 | 499 | 500 | 9 |

|     |     |     |     |   |
|-----|-----|-----|-----|---|
| 497 | 496 | 499 | 501 | 9 |
| 497 | 496 | 499 | 502 | 9 |
| 498 | 496 | 499 | 500 | 9 |
| 498 | 496 | 499 | 501 | 9 |
| 498 | 496 | 499 | 502 | 9 |
| 496 | 499 | 502 | 503 | 9 |
| 496 | 499 | 502 | 504 | 9 |
| 496 | 499 | 502 | 505 | 9 |
| 500 | 499 | 502 | 503 | 9 |
| 500 | 499 | 502 | 504 | 9 |
| 500 | 499 | 502 | 505 | 9 |
| 501 | 499 | 502 | 503 | 9 |
| 501 | 499 | 502 | 504 | 9 |
| 501 | 499 | 502 | 505 | 9 |
| 479 | 506 | 508 | 509 | 9 |
| 479 | 506 | 508 | 510 | 9 |
| 507 | 506 | 508 | 509 | 9 |
| 507 | 506 | 508 | 510 | 9 |
| 534 | 506 | 508 | 509 | 9 |
| 534 | 506 | 508 | 510 | 9 |
| 479 | 506 | 534 | 535 | 9 |
| 479 | 506 | 534 | 536 | 9 |
| 479 | 506 | 534 | 539 | 9 |
| 507 | 506 | 534 | 535 | 9 |
| 507 | 506 | 534 | 536 | 9 |
| 507 | 506 | 534 | 539 | 9 |
| 508 | 506 | 534 | 535 | 9 |
| 508 | 506 | 534 | 536 | 9 |
| 508 | 506 | 534 | 539 | 9 |
| 506 | 508 | 510 | 511 | 9 |
| 506 | 508 | 510 | 512 | 9 |
| 509 | 508 | 510 | 511 | 9 |
| 509 | 508 | 510 | 512 | 9 |
| 508 | 510 | 512 | 513 | 9 |
| 508 | 510 | 512 | 514 | 9 |
| 508 | 510 | 512 | 515 | 9 |
| 511 | 510 | 512 | 513 | 9 |
| 511 | 510 | 512 | 514 | 9 |
| 511 | 510 | 512 | 515 | 9 |
| 510 | 512 | 515 | 516 | 9 |
| 510 | 512 | 515 | 517 | 9 |
| 510 | 512 | 515 | 518 | 9 |
| 513 | 512 | 515 | 516 | 9 |
| 513 | 512 | 515 | 517 | 9 |
| 513 | 512 | 515 | 518 | 9 |
| 514 | 512 | 515 | 516 | 9 |
| 514 | 512 | 515 | 517 | 9 |
| 514 | 512 | 515 | 518 | 9 |
| 512 | 515 | 518 | 519 | 9 |
| 512 | 515 | 518 | 520 | 9 |
| 512 | 515 | 518 | 521 | 9 |
| 516 | 515 | 518 | 519 | 9 |
| 516 | 515 | 518 | 520 | 9 |
| 516 | 515 | 518 | 521 | 9 |

|     |     |     |     |   |
|-----|-----|-----|-----|---|
| 517 | 515 | 518 | 519 | 9 |
| 517 | 515 | 518 | 520 | 9 |
| 517 | 515 | 518 | 521 | 9 |
| 515 | 518 | 521 | 522 | 9 |
| 515 | 518 | 521 | 526 | 9 |
| 515 | 518 | 521 | 530 | 9 |
| 519 | 518 | 521 | 522 | 9 |
| 519 | 518 | 521 | 526 | 9 |
| 519 | 518 | 521 | 530 | 9 |
| 520 | 518 | 521 | 522 | 9 |
| 520 | 518 | 521 | 526 | 9 |
| 520 | 518 | 521 | 530 | 9 |
| 518 | 521 | 522 | 523 | 9 |
| 518 | 521 | 522 | 524 | 9 |
| 518 | 521 | 522 | 525 | 9 |
| 526 | 521 | 522 | 523 | 9 |
| 526 | 521 | 522 | 524 | 9 |
| 526 | 521 | 522 | 525 | 9 |
| 530 | 521 | 522 | 523 | 9 |
| 530 | 521 | 522 | 524 | 9 |
| 530 | 521 | 522 | 525 | 9 |
| 518 | 521 | 526 | 527 | 9 |
| 518 | 521 | 526 | 528 | 9 |
| 518 | 521 | 526 | 529 | 9 |
| 522 | 521 | 526 | 527 | 9 |
| 522 | 521 | 526 | 528 | 9 |
| 522 | 521 | 526 | 529 | 9 |
| 530 | 521 | 526 | 527 | 9 |
| 530 | 521 | 526 | 528 | 9 |
| 530 | 521 | 526 | 529 | 9 |
| 518 | 521 | 530 | 531 | 9 |
| 518 | 521 | 530 | 532 | 9 |
| 518 | 521 | 530 | 533 | 9 |
| 522 | 521 | 530 | 531 | 9 |
| 522 | 521 | 530 | 532 | 9 |
| 522 | 521 | 530 | 533 | 9 |
| 526 | 521 | 530 | 531 | 9 |
| 526 | 521 | 530 | 532 | 9 |
| 526 | 521 | 530 | 533 | 9 |
| 506 | 534 | 536 | 537 | 9 |
| 506 | 534 | 536 | 538 | 9 |
| 535 | 534 | 536 | 537 | 9 |
| 535 | 534 | 536 | 538 | 9 |
| 539 | 534 | 536 | 537 | 9 |
| 539 | 534 | 536 | 538 | 9 |
| 506 | 534 | 539 | 540 | 9 |
| 506 | 534 | 539 | 541 | 9 |
| 506 | 534 | 539 | 542 | 9 |
| 535 | 534 | 539 | 540 | 9 |
| 535 | 534 | 539 | 541 | 9 |
| 535 | 534 | 539 | 542 | 9 |
| 536 | 534 | 539 | 540 | 9 |
| 536 | 534 | 539 | 541 | 9 |
| 536 | 534 | 539 | 542 | 9 |

|     |     |     |     |   |
|-----|-----|-----|-----|---|
| 534 | 539 | 542 | 543 | 9 |
| 534 | 539 | 542 | 544 | 9 |
| 534 | 539 | 542 | 569 | 9 |
| 540 | 539 | 542 | 543 | 9 |
| 540 | 539 | 542 | 544 | 9 |
| 540 | 539 | 542 | 569 | 9 |
| 541 | 539 | 542 | 543 | 9 |
| 541 | 539 | 542 | 544 | 9 |
| 541 | 539 | 542 | 569 | 9 |
| 539 | 542 | 544 | 545 | 9 |
| 539 | 542 | 544 | 546 | 9 |
| 539 | 542 | 544 | 547 | 9 |
| 543 | 542 | 544 | 545 | 9 |
| 543 | 542 | 544 | 546 | 9 |
| 543 | 542 | 544 | 547 | 9 |
| 569 | 542 | 544 | 545 | 9 |
| 569 | 542 | 544 | 546 | 9 |
| 569 | 542 | 544 | 547 | 9 |
| 539 | 542 | 569 | 570 | 9 |
| 539 | 542 | 569 | 571 | 9 |
| 539 | 542 | 569 | 597 | 9 |
| 543 | 542 | 569 | 570 | 9 |
| 543 | 542 | 569 | 571 | 9 |
| 543 | 542 | 569 | 597 | 9 |
| 544 | 542 | 569 | 570 | 9 |
| 544 | 542 | 569 | 571 | 9 |
| 544 | 542 | 569 | 597 | 9 |
| 542 | 544 | 547 | 548 | 9 |
| 542 | 544 | 547 | 549 | 9 |
| 542 | 544 | 547 | 550 | 9 |
| 545 | 544 | 547 | 548 | 9 |
| 545 | 544 | 547 | 549 | 9 |
| 545 | 544 | 547 | 550 | 9 |
| 546 | 544 | 547 | 548 | 9 |
| 546 | 544 | 547 | 549 | 9 |
| 546 | 544 | 547 | 550 | 9 |
| 544 | 547 | 550 | 551 | 9 |
| 544 | 547 | 550 | 552 | 9 |
| 544 | 547 | 550 | 553 | 9 |
| 548 | 547 | 550 | 551 | 9 |
| 548 | 547 | 550 | 552 | 9 |
| 548 | 547 | 550 | 553 | 9 |
| 549 | 547 | 550 | 551 | 9 |
| 549 | 547 | 550 | 552 | 9 |
| 549 | 547 | 550 | 553 | 9 |
| 547 | 550 | 553 | 554 | 9 |
| 547 | 550 | 553 | 555 | 9 |
| 547 | 550 | 553 | 556 | 9 |
| 551 | 550 | 553 | 554 | 9 |
| 551 | 550 | 553 | 555 | 9 |
| 551 | 550 | 553 | 556 | 9 |
| 552 | 550 | 553 | 554 | 9 |
| 552 | 550 | 553 | 555 | 9 |
| 552 | 550 | 553 | 556 | 9 |

|     |     |     |     |   |
|-----|-----|-----|-----|---|
| 550 | 553 | 556 | 557 | 9 |
| 550 | 553 | 556 | 558 | 9 |
| 550 | 553 | 556 | 559 | 9 |
| 554 | 553 | 556 | 557 | 9 |
| 554 | 553 | 556 | 558 | 9 |
| 554 | 553 | 556 | 559 | 9 |
| 555 | 553 | 556 | 557 | 9 |
| 555 | 553 | 556 | 558 | 9 |
| 555 | 553 | 556 | 559 | 9 |
| 553 | 556 | 559 | 560 | 9 |
| 553 | 556 | 559 | 561 | 9 |
| 553 | 556 | 559 | 562 | 9 |
| 557 | 556 | 559 | 560 | 9 |
| 557 | 556 | 559 | 561 | 9 |
| 557 | 556 | 559 | 562 | 9 |
| 558 | 556 | 559 | 560 | 9 |
| 558 | 556 | 559 | 561 | 9 |
| 558 | 556 | 559 | 562 | 9 |
| 556 | 559 | 562 | 563 | 9 |
| 556 | 559 | 562 | 564 | 9 |
| 556 | 559 | 562 | 565 | 9 |
| 560 | 559 | 562 | 563 | 9 |
| 560 | 559 | 562 | 564 | 9 |
| 560 | 559 | 562 | 565 | 9 |
| 561 | 559 | 562 | 563 | 9 |
| 561 | 559 | 562 | 564 | 9 |
| 561 | 559 | 562 | 565 | 9 |
| 559 | 562 | 565 | 566 | 9 |
| 559 | 562 | 565 | 567 | 9 |
| 559 | 562 | 565 | 568 | 9 |
| 563 | 562 | 565 | 566 | 9 |
| 563 | 562 | 565 | 567 | 9 |
| 563 | 562 | 565 | 568 | 9 |
| 564 | 562 | 565 | 566 | 9 |
| 564 | 562 | 565 | 567 | 9 |
| 564 | 562 | 565 | 568 | 9 |
| 542 | 569 | 571 | 572 | 9 |
| 542 | 569 | 571 | 573 | 9 |
| 570 | 569 | 571 | 572 | 9 |
| 570 | 569 | 571 | 573 | 9 |
| 597 | 569 | 571 | 572 | 9 |
| 597 | 569 | 571 | 573 | 9 |
| 542 | 569 | 597 | 598 | 9 |
| 542 | 569 | 597 | 599 | 9 |
| 542 | 569 | 597 | 602 | 9 |
| 570 | 569 | 597 | 598 | 9 |
| 570 | 569 | 597 | 599 | 9 |
| 570 | 569 | 597 | 602 | 9 |
| 571 | 569 | 597 | 598 | 9 |
| 571 | 569 | 597 | 599 | 9 |
| 571 | 569 | 597 | 602 | 9 |
| 569 | 571 | 573 | 574 | 9 |
| 569 | 571 | 573 | 575 | 9 |
| 572 | 571 | 573 | 574 | 9 |

|     |     |     |     |   |
|-----|-----|-----|-----|---|
| 572 | 571 | 573 | 575 | 9 |
| 571 | 573 | 575 | 576 | 9 |
| 571 | 573 | 575 | 577 | 9 |
| 571 | 573 | 575 | 578 | 9 |
| 574 | 573 | 575 | 576 | 9 |
| 574 | 573 | 575 | 577 | 9 |
| 574 | 573 | 575 | 578 | 9 |
| 573 | 575 | 578 | 579 | 9 |
| 573 | 575 | 578 | 580 | 9 |
| 573 | 575 | 578 | 581 | 9 |
| 576 | 575 | 578 | 579 | 9 |
| 576 | 575 | 578 | 580 | 9 |
| 576 | 575 | 578 | 581 | 9 |
| 577 | 575 | 578 | 579 | 9 |
| 577 | 575 | 578 | 580 | 9 |
| 577 | 575 | 578 | 581 | 9 |
| 575 | 578 | 581 | 582 | 9 |
| 575 | 578 | 581 | 583 | 9 |
| 575 | 578 | 581 | 584 | 9 |
| 579 | 578 | 581 | 582 | 9 |
| 579 | 578 | 581 | 583 | 9 |
| 579 | 578 | 581 | 584 | 9 |
| 580 | 578 | 581 | 582 | 9 |
| 580 | 578 | 581 | 583 | 9 |
| 580 | 578 | 581 | 584 | 9 |
| 578 | 581 | 584 | 585 | 9 |
| 578 | 581 | 584 | 589 | 9 |
| 578 | 581 | 584 | 593 | 9 |
| 582 | 581 | 584 | 585 | 9 |
| 582 | 581 | 584 | 589 | 9 |
| 582 | 581 | 584 | 593 | 9 |
| 583 | 581 | 584 | 585 | 9 |
| 583 | 581 | 584 | 589 | 9 |
| 583 | 581 | 584 | 593 | 9 |
| 581 | 584 | 585 | 586 | 9 |
| 581 | 584 | 585 | 587 | 9 |
| 581 | 584 | 585 | 588 | 9 |
| 589 | 584 | 585 | 586 | 9 |
| 589 | 584 | 585 | 587 | 9 |
| 589 | 584 | 585 | 588 | 9 |
| 593 | 584 | 585 | 586 | 9 |
| 593 | 584 | 585 | 587 | 9 |
| 593 | 584 | 585 | 588 | 9 |
| 581 | 584 | 589 | 590 | 9 |
| 581 | 584 | 589 | 591 | 9 |
| 581 | 584 | 589 | 592 | 9 |
| 585 | 584 | 589 | 590 | 9 |
| 585 | 584 | 589 | 591 | 9 |
| 585 | 584 | 589 | 592 | 9 |
| 593 | 584 | 589 | 590 | 9 |
| 593 | 584 | 589 | 591 | 9 |
| 593 | 584 | 589 | 592 | 9 |
| 581 | 584 | 593 | 594 | 9 |
| 581 | 584 | 593 | 595 | 9 |

|     |     |     |     |   |
|-----|-----|-----|-----|---|
| 581 | 584 | 593 | 596 | 9 |
| 585 | 584 | 593 | 594 | 9 |
| 585 | 584 | 593 | 595 | 9 |
| 585 | 584 | 593 | 596 | 9 |
| 589 | 584 | 593 | 594 | 9 |
| 589 | 584 | 593 | 595 | 9 |
| 589 | 584 | 593 | 596 | 9 |
| 569 | 597 | 599 | 600 | 9 |
| 569 | 597 | 599 | 601 | 9 |
| 598 | 597 | 599 | 600 | 9 |
| 598 | 597 | 599 | 601 | 9 |
| 602 | 597 | 599 | 600 | 9 |
| 602 | 597 | 599 | 601 | 9 |
| 569 | 597 | 602 | 603 | 9 |
| 569 | 597 | 602 | 604 | 9 |
| 569 | 597 | 602 | 605 | 9 |
| 598 | 597 | 602 | 603 | 9 |
| 598 | 597 | 602 | 604 | 9 |
| 598 | 597 | 602 | 605 | 9 |
| 599 | 597 | 602 | 603 | 9 |
| 599 | 597 | 602 | 604 | 9 |
| 599 | 597 | 602 | 605 | 9 |
| 597 | 602 | 605 | 606 | 9 |
| 597 | 602 | 605 | 607 | 9 |
| 597 | 602 | 605 | 632 | 9 |
| 603 | 602 | 605 | 606 | 9 |
| 603 | 602 | 605 | 607 | 9 |
| 603 | 602 | 605 | 632 | 9 |
| 604 | 602 | 605 | 606 | 9 |
| 604 | 602 | 605 | 607 | 9 |
| 604 | 602 | 605 | 632 | 9 |
| 602 | 605 | 607 | 608 | 9 |
| 602 | 605 | 607 | 609 | 9 |
| 602 | 605 | 607 | 610 | 9 |
| 606 | 605 | 607 | 608 | 9 |
| 606 | 605 | 607 | 609 | 9 |
| 606 | 605 | 607 | 610 | 9 |
| 632 | 605 | 607 | 608 | 9 |
| 632 | 605 | 607 | 609 | 9 |
| 632 | 605 | 607 | 610 | 9 |
| 602 | 605 | 632 | 633 | 9 |
| 602 | 605 | 632 | 634 | 9 |
| 602 | 605 | 632 | 660 | 9 |
| 606 | 605 | 632 | 633 | 9 |
| 606 | 605 | 632 | 634 | 9 |
| 606 | 605 | 632 | 660 | 9 |
| 607 | 605 | 632 | 633 | 9 |
| 607 | 605 | 632 | 634 | 9 |
| 607 | 605 | 632 | 660 | 9 |
| 605 | 607 | 610 | 611 | 9 |
| 605 | 607 | 610 | 612 | 9 |
| 605 | 607 | 610 | 613 | 9 |
| 608 | 607 | 610 | 611 | 9 |
| 608 | 607 | 610 | 612 | 9 |



|     |     |     |     |   |
|-----|-----|-----|-----|---|
| 608 | 607 | 610 | 613 | 9 |
| 609 | 607 | 610 | 611 | 9 |
| 609 | 607 | 610 | 612 | 9 |
| 609 | 607 | 610 | 613 | 9 |
| 607 | 610 | 613 | 614 | 9 |
| 607 | 610 | 613 | 615 | 9 |
| 607 | 610 | 613 | 616 | 9 |
| 611 | 610 | 613 | 614 | 9 |
| 611 | 610 | 613 | 615 | 9 |
| 611 | 610 | 613 | 616 | 9 |
| 612 | 610 | 613 | 614 | 9 |
| 612 | 610 | 613 | 615 | 9 |
| 612 | 610 | 613 | 616 | 9 |
| 610 | 613 | 616 | 617 | 9 |
| 610 | 613 | 616 | 618 | 9 |
| 610 | 613 | 616 | 619 | 9 |
| 614 | 613 | 616 | 617 | 9 |
| 614 | 613 | 616 | 618 | 9 |
| 614 | 613 | 616 | 619 | 9 |
| 615 | 613 | 616 | 617 | 9 |
| 615 | 613 | 616 | 618 | 9 |
| 615 | 613 | 616 | 619 | 9 |
| 613 | 616 | 619 | 620 | 9 |
| 613 | 616 | 619 | 621 | 9 |
| 613 | 616 | 619 | 622 | 9 |
| 617 | 616 | 619 | 620 | 9 |
| 617 | 616 | 619 | 621 | 9 |
| 617 | 616 | 619 | 622 | 9 |
| 618 | 616 | 619 | 620 | 9 |
| 618 | 616 | 619 | 621 | 9 |
| 618 | 616 | 619 | 622 | 9 |
| 616 | 619 | 622 | 623 | 9 |
| 616 | 619 | 622 | 624 | 9 |
| 616 | 619 | 622 | 625 | 9 |
| 620 | 619 | 622 | 623 | 9 |
| 620 | 619 | 622 | 624 | 9 |
| 620 | 619 | 622 | 625 | 9 |
| 621 | 619 | 622 | 623 | 9 |
| 621 | 619 | 622 | 624 | 9 |
| 621 | 619 | 622 | 625 | 9 |
| 619 | 622 | 625 | 626 | 9 |
| 619 | 622 | 625 | 627 | 9 |
| 619 | 622 | 625 | 628 | 9 |
| 623 | 622 | 625 | 626 | 9 |
| 623 | 622 | 625 | 627 | 9 |
| 623 | 622 | 625 | 628 | 9 |
| 624 | 622 | 625 | 626 | 9 |
| 624 | 622 | 625 | 627 | 9 |
| 624 | 622 | 625 | 628 | 9 |
| 622 | 625 | 628 | 629 | 9 |
| 622 | 625 | 628 | 630 | 9 |
| 622 | 625 | 628 | 631 | 9 |
| 626 | 625 | 628 | 629 | 9 |
| 626 | 625 | 628 | 630 | 9 |

|     |     |     |     |   |
|-----|-----|-----|-----|---|
| 626 | 625 | 628 | 631 | 9 |
| 627 | 625 | 628 | 629 | 9 |
| 627 | 625 | 628 | 630 | 9 |
| 627 | 625 | 628 | 631 | 9 |
| 605 | 632 | 634 | 635 | 9 |
| 605 | 632 | 634 | 636 | 9 |
| 633 | 632 | 634 | 635 | 9 |
| 633 | 632 | 634 | 636 | 9 |
| 660 | 632 | 634 | 635 | 9 |
| 660 | 632 | 634 | 636 | 9 |
| 605 | 632 | 660 | 661 | 9 |
| 605 | 632 | 660 | 662 | 9 |
| 605 | 632 | 660 | 665 | 9 |
| 633 | 632 | 660 | 661 | 9 |
| 633 | 632 | 660 | 662 | 9 |
| 633 | 632 | 660 | 665 | 9 |
| 634 | 632 | 660 | 661 | 9 |
| 634 | 632 | 660 | 662 | 9 |
| 634 | 632 | 660 | 665 | 9 |
| 632 | 634 | 636 | 637 | 9 |
| 632 | 634 | 636 | 638 | 9 |
| 635 | 634 | 636 | 637 | 9 |
| 635 | 634 | 636 | 638 | 9 |
| 634 | 636 | 638 | 639 | 9 |
| 634 | 636 | 638 | 640 | 9 |
| 634 | 636 | 638 | 641 | 9 |
| 637 | 636 | 638 | 639 | 9 |
| 637 | 636 | 638 | 640 | 9 |
| 637 | 636 | 638 | 641 | 9 |
| 636 | 638 | 641 | 642 | 9 |
| 636 | 638 | 641 | 643 | 9 |
| 636 | 638 | 641 | 644 | 9 |
| 639 | 638 | 641 | 642 | 9 |
| 639 | 638 | 641 | 643 | 9 |
| 639 | 638 | 641 | 644 | 9 |
| 640 | 638 | 641 | 642 | 9 |
| 640 | 638 | 641 | 643 | 9 |
| 640 | 638 | 641 | 644 | 9 |
| 638 | 641 | 644 | 645 | 9 |
| 638 | 641 | 644 | 646 | 9 |
| 638 | 641 | 644 | 647 | 9 |
| 642 | 641 | 644 | 645 | 9 |
| 642 | 641 | 644 | 646 | 9 |
| 642 | 641 | 644 | 647 | 9 |
| 643 | 641 | 644 | 645 | 9 |
| 643 | 641 | 644 | 646 | 9 |
| 643 | 641 | 644 | 647 | 9 |
| 641 | 644 | 647 | 648 | 9 |
| 641 | 644 | 647 | 652 | 9 |
| 641 | 644 | 647 | 656 | 9 |
| 645 | 644 | 647 | 648 | 9 |
| 645 | 644 | 647 | 652 | 9 |
| 645 | 644 | 647 | 656 | 9 |
| 646 | 644 | 647 | 648 | 9 |

|     |     |     |     |   |
|-----|-----|-----|-----|---|
| 646 | 644 | 647 | 652 | 9 |
| 646 | 644 | 647 | 656 | 9 |
| 644 | 647 | 648 | 649 | 9 |
| 644 | 647 | 648 | 650 | 9 |
| 644 | 647 | 648 | 651 | 9 |
| 652 | 647 | 648 | 649 | 9 |
| 652 | 647 | 648 | 650 | 9 |
| 652 | 647 | 648 | 651 | 9 |
| 656 | 647 | 648 | 649 | 9 |
| 656 | 647 | 648 | 650 | 9 |
| 656 | 647 | 648 | 651 | 9 |
| 644 | 647 | 652 | 653 | 9 |
| 644 | 647 | 652 | 654 | 9 |
| 644 | 647 | 652 | 655 | 9 |
| 648 | 647 | 652 | 653 | 9 |
| 648 | 647 | 652 | 654 | 9 |
| 648 | 647 | 652 | 655 | 9 |
| 656 | 647 | 652 | 653 | 9 |
| 656 | 647 | 652 | 654 | 9 |
| 656 | 647 | 652 | 655 | 9 |
| 644 | 647 | 656 | 657 | 9 |
| 644 | 647 | 656 | 658 | 9 |
| 644 | 647 | 656 | 659 | 9 |
| 648 | 647 | 656 | 657 | 9 |
| 648 | 647 | 656 | 658 | 9 |
| 648 | 647 | 656 | 659 | 9 |
| 652 | 647 | 656 | 657 | 9 |
| 652 | 647 | 656 | 658 | 9 |
| 652 | 647 | 656 | 659 | 9 |
| 632 | 660 | 662 | 663 | 9 |
| 632 | 660 | 662 | 664 | 9 |
| 661 | 660 | 662 | 663 | 9 |
| 661 | 660 | 662 | 664 | 9 |
| 665 | 660 | 662 | 663 | 9 |
| 665 | 660 | 662 | 664 | 9 |
| 632 | 660 | 665 | 666 | 9 |
| 632 | 660 | 665 | 667 | 9 |
| 632 | 660 | 665 | 668 | 9 |
| 661 | 660 | 665 | 666 | 9 |
| 661 | 660 | 665 | 667 | 9 |
| 661 | 660 | 665 | 668 | 9 |
| 662 | 660 | 665 | 666 | 9 |
| 662 | 660 | 665 | 667 | 9 |
| 662 | 660 | 665 | 668 | 9 |
| 660 | 665 | 668 | 669 | 9 |
| 660 | 665 | 668 | 670 | 9 |
| 660 | 665 | 668 | 695 | 9 |
| 666 | 665 | 668 | 669 | 9 |
| 666 | 665 | 668 | 670 | 9 |
| 666 | 665 | 668 | 695 | 9 |
| 667 | 665 | 668 | 669 | 9 |
| 667 | 665 | 668 | 670 | 9 |
| 667 | 665 | 668 | 695 | 9 |
| 665 | 668 | 670 | 671 | 9 |

|     |     |     |     |   |
|-----|-----|-----|-----|---|
| 665 | 668 | 670 | 672 | 9 |
| 665 | 668 | 670 | 673 | 9 |
| 669 | 668 | 670 | 671 | 9 |
| 669 | 668 | 670 | 672 | 9 |
| 669 | 668 | 670 | 673 | 9 |
| 695 | 668 | 670 | 671 | 9 |
| 695 | 668 | 670 | 672 | 9 |
| 695 | 668 | 670 | 673 | 9 |
| 665 | 668 | 695 | 696 | 9 |
| 665 | 668 | 695 | 697 | 9 |
| 665 | 668 | 695 | 723 | 9 |
| 669 | 668 | 695 | 696 | 9 |
| 669 | 668 | 695 | 697 | 9 |
| 669 | 668 | 695 | 723 | 9 |
| 670 | 668 | 695 | 696 | 9 |
| 670 | 668 | 695 | 697 | 9 |
| 670 | 668 | 695 | 723 | 9 |
| 668 | 670 | 673 | 674 | 9 |
| 668 | 670 | 673 | 675 | 9 |
| 668 | 670 | 673 | 676 | 9 |
| 671 | 670 | 673 | 674 | 9 |
| 671 | 670 | 673 | 675 | 9 |
| 671 | 670 | 673 | 676 | 9 |
| 672 | 670 | 673 | 674 | 9 |
| 672 | 670 | 673 | 675 | 9 |
| 672 | 670 | 673 | 676 | 9 |
| 670 | 673 | 676 | 677 | 9 |
| 670 | 673 | 676 | 678 | 9 |
| 670 | 673 | 676 | 679 | 9 |
| 674 | 673 | 676 | 677 | 9 |
| 674 | 673 | 676 | 678 | 9 |
| 674 | 673 | 676 | 679 | 9 |
| 675 | 673 | 676 | 677 | 9 |
| 675 | 673 | 676 | 678 | 9 |
| 675 | 673 | 676 | 679 | 9 |
| 673 | 676 | 679 | 680 | 9 |
| 673 | 676 | 679 | 681 | 9 |
| 673 | 676 | 679 | 682 | 9 |
| 677 | 676 | 679 | 680 | 9 |
| 677 | 676 | 679 | 681 | 9 |
| 677 | 676 | 679 | 682 | 9 |
| 678 | 676 | 679 | 680 | 9 |
| 678 | 676 | 679 | 681 | 9 |
| 678 | 676 | 679 | 682 | 9 |
| 676 | 679 | 682 | 683 | 9 |
| 676 | 679 | 682 | 684 | 9 |
| 676 | 679 | 682 | 685 | 9 |
| 680 | 679 | 682 | 683 | 9 |
| 680 | 679 | 682 | 684 | 9 |
| 680 | 679 | 682 | 685 | 9 |
| 681 | 679 | 682 | 683 | 9 |
| 681 | 679 | 682 | 684 | 9 |
| 681 | 679 | 682 | 685 | 9 |
| 679 | 682 | 685 | 686 | 9 |

|     |     |     |     |   |
|-----|-----|-----|-----|---|
| 679 | 682 | 685 | 687 | 9 |
| 679 | 682 | 685 | 688 | 9 |
| 683 | 682 | 685 | 686 | 9 |
| 683 | 682 | 685 | 687 | 9 |
| 683 | 682 | 685 | 688 | 9 |
| 684 | 682 | 685 | 686 | 9 |
| 684 | 682 | 685 | 687 | 9 |
| 684 | 682 | 685 | 688 | 9 |
| 682 | 685 | 688 | 689 | 9 |
| 682 | 685 | 688 | 690 | 9 |
| 682 | 685 | 688 | 691 | 9 |
| 686 | 685 | 688 | 689 | 9 |
| 686 | 685 | 688 | 690 | 9 |
| 686 | 685 | 688 | 691 | 9 |
| 687 | 685 | 688 | 689 | 9 |
| 687 | 685 | 688 | 690 | 9 |
| 687 | 685 | 688 | 691 | 9 |
| 685 | 688 | 691 | 692 | 9 |
| 685 | 688 | 691 | 693 | 9 |
| 685 | 688 | 691 | 694 | 9 |
| 689 | 688 | 691 | 692 | 9 |
| 689 | 688 | 691 | 693 | 9 |
| 689 | 688 | 691 | 694 | 9 |
| 690 | 688 | 691 | 692 | 9 |
| 690 | 688 | 691 | 693 | 9 |
| 690 | 688 | 691 | 694 | 9 |
| 668 | 695 | 697 | 698 | 9 |
| 668 | 695 | 697 | 699 | 9 |
| 696 | 695 | 697 | 698 | 9 |
| 696 | 695 | 697 | 699 | 9 |
| 723 | 695 | 697 | 698 | 9 |
| 723 | 695 | 697 | 699 | 9 |
| 668 | 695 | 723 | 724 | 9 |
| 668 | 695 | 723 | 725 | 9 |
| 668 | 695 | 723 | 728 | 9 |
| 696 | 695 | 723 | 724 | 9 |
| 696 | 695 | 723 | 725 | 9 |
| 696 | 695 | 723 | 728 | 9 |
| 697 | 695 | 723 | 724 | 9 |
| 697 | 695 | 723 | 725 | 9 |
| 697 | 695 | 723 | 728 | 9 |
| 695 | 697 | 699 | 700 | 9 |
| 695 | 697 | 699 | 701 | 9 |
| 698 | 697 | 699 | 700 | 9 |
| 698 | 697 | 699 | 701 | 9 |
| 697 | 699 | 701 | 702 | 9 |
| 697 | 699 | 701 | 703 | 9 |
| 697 | 699 | 701 | 704 | 9 |
| 700 | 699 | 701 | 702 | 9 |
| 700 | 699 | 701 | 703 | 9 |
| 700 | 699 | 701 | 704 | 9 |
| 699 | 701 | 704 | 705 | 9 |
| 699 | 701 | 704 | 706 | 9 |
| 699 | 701 | 704 | 707 | 9 |

|     |     |     |     |   |
|-----|-----|-----|-----|---|
| 702 | 701 | 704 | 705 | 9 |
| 702 | 701 | 704 | 706 | 9 |
| 702 | 701 | 704 | 707 | 9 |
| 703 | 701 | 704 | 705 | 9 |
| 703 | 701 | 704 | 706 | 9 |
| 703 | 701 | 704 | 707 | 9 |
| 701 | 704 | 707 | 708 | 9 |
| 701 | 704 | 707 | 709 | 9 |
| 701 | 704 | 707 | 710 | 9 |
| 705 | 704 | 707 | 708 | 9 |
| 705 | 704 | 707 | 709 | 9 |
| 705 | 704 | 707 | 710 | 9 |
| 706 | 704 | 707 | 708 | 9 |
| 706 | 704 | 707 | 709 | 9 |
| 706 | 704 | 707 | 710 | 9 |
| 704 | 707 | 710 | 711 | 9 |
| 704 | 707 | 710 | 715 | 9 |
| 704 | 707 | 710 | 719 | 9 |
| 708 | 707 | 710 | 711 | 9 |
| 708 | 707 | 710 | 715 | 9 |
| 708 | 707 | 710 | 719 | 9 |
| 709 | 707 | 710 | 711 | 9 |
| 709 | 707 | 710 | 715 | 9 |
| 709 | 707 | 710 | 719 | 9 |
| 707 | 710 | 711 | 712 | 9 |
| 707 | 710 | 711 | 713 | 9 |
| 707 | 710 | 711 | 714 | 9 |
| 715 | 710 | 711 | 712 | 9 |
| 715 | 710 | 711 | 713 | 9 |
| 715 | 710 | 711 | 714 | 9 |
| 719 | 710 | 711 | 712 | 9 |
| 719 | 710 | 711 | 713 | 9 |
| 719 | 710 | 711 | 714 | 9 |
| 707 | 710 | 715 | 716 | 9 |
| 707 | 710 | 715 | 717 | 9 |
| 707 | 710 | 715 | 718 | 9 |
| 711 | 710 | 715 | 716 | 9 |
| 711 | 710 | 715 | 717 | 9 |
| 711 | 710 | 715 | 718 | 9 |
| 719 | 710 | 715 | 716 | 9 |
| 719 | 710 | 715 | 717 | 9 |
| 719 | 710 | 715 | 718 | 9 |
| 707 | 710 | 719 | 720 | 9 |
| 707 | 710 | 719 | 721 | 9 |
| 707 | 710 | 719 | 722 | 9 |
| 711 | 710 | 719 | 720 | 9 |
| 711 | 710 | 719 | 721 | 9 |
| 711 | 710 | 719 | 722 | 9 |
| 715 | 710 | 719 | 720 | 9 |
| 715 | 710 | 719 | 721 | 9 |
| 715 | 710 | 719 | 722 | 9 |
| 695 | 723 | 725 | 726 | 9 |
| 695 | 723 | 725 | 727 | 9 |
| 724 | 723 | 725 | 726 | 9 |

|     |     |     |     |   |
|-----|-----|-----|-----|---|
| 724 | 723 | 725 | 727 | 9 |
| 728 | 723 | 725 | 726 | 9 |
| 728 | 723 | 725 | 727 | 9 |
| 695 | 723 | 728 | 729 | 9 |
| 695 | 723 | 728 | 730 | 9 |
| 695 | 723 | 728 | 731 | 9 |
| 724 | 723 | 728 | 729 | 9 |
| 724 | 723 | 728 | 730 | 9 |
| 724 | 723 | 728 | 731 | 9 |
| 725 | 723 | 728 | 729 | 9 |
| 725 | 723 | 728 | 730 | 9 |
| 725 | 723 | 728 | 731 | 9 |
| 723 | 728 | 731 | 732 | 9 |
| 723 | 728 | 731 | 733 | 9 |
| 723 | 728 | 731 | 758 | 9 |
| 729 | 728 | 731 | 732 | 9 |
| 729 | 728 | 731 | 733 | 9 |
| 729 | 728 | 731 | 758 | 9 |
| 730 | 728 | 731 | 732 | 9 |
| 730 | 728 | 731 | 733 | 9 |
| 730 | 728 | 731 | 758 | 9 |
| 728 | 731 | 733 | 734 | 9 |
| 728 | 731 | 733 | 735 | 9 |
| 728 | 731 | 733 | 736 | 9 |
| 732 | 731 | 733 | 734 | 9 |
| 732 | 731 | 733 | 735 | 9 |
| 732 | 731 | 733 | 736 | 9 |
| 758 | 731 | 733 | 734 | 9 |
| 758 | 731 | 733 | 735 | 9 |
| 758 | 731 | 733 | 736 | 9 |
| 728 | 731 | 758 | 759 | 9 |
| 728 | 731 | 758 | 760 | 9 |
| 728 | 731 | 758 | 786 | 9 |
| 732 | 731 | 758 | 759 | 9 |
| 732 | 731 | 758 | 760 | 9 |
| 732 | 731 | 758 | 786 | 9 |
| 733 | 731 | 758 | 759 | 9 |
| 733 | 731 | 758 | 760 | 9 |
| 733 | 731 | 758 | 786 | 9 |
| 731 | 733 | 736 | 737 | 9 |
| 731 | 733 | 736 | 738 | 9 |
| 731 | 733 | 736 | 739 | 9 |
| 734 | 733 | 736 | 737 | 9 |
| 734 | 733 | 736 | 738 | 9 |
| 734 | 733 | 736 | 739 | 9 |
| 735 | 733 | 736 | 737 | 9 |
| 735 | 733 | 736 | 738 | 9 |
| 735 | 733 | 736 | 739 | 9 |
| 733 | 736 | 739 | 740 | 9 |
| 733 | 736 | 739 | 741 | 9 |
| 733 | 736 | 739 | 742 | 9 |
| 737 | 736 | 739 | 740 | 9 |
| 737 | 736 | 739 | 741 | 9 |
| 737 | 736 | 739 | 742 | 9 |

|     |     |     |     |   |
|-----|-----|-----|-----|---|
| 738 | 736 | 739 | 740 | 9 |
| 738 | 736 | 739 | 741 | 9 |
| 738 | 736 | 739 | 742 | 9 |
| 736 | 739 | 742 | 743 | 9 |
| 736 | 739 | 742 | 744 | 9 |
| 736 | 739 | 742 | 745 | 9 |
| 740 | 739 | 742 | 743 | 9 |
| 740 | 739 | 742 | 744 | 9 |
| 740 | 739 | 742 | 745 | 9 |
| 741 | 739 | 742 | 743 | 9 |
| 741 | 739 | 742 | 744 | 9 |
| 741 | 739 | 742 | 745 | 9 |
| 739 | 742 | 745 | 746 | 9 |
| 739 | 742 | 745 | 747 | 9 |
| 739 | 742 | 745 | 748 | 9 |
| 743 | 742 | 745 | 746 | 9 |
| 743 | 742 | 745 | 747 | 9 |
| 743 | 742 | 745 | 748 | 9 |
| 744 | 742 | 745 | 746 | 9 |
| 744 | 742 | 745 | 747 | 9 |
| 744 | 742 | 745 | 748 | 9 |
| 742 | 745 | 748 | 749 | 9 |
| 742 | 745 | 748 | 750 | 9 |
| 742 | 745 | 748 | 751 | 9 |
| 746 | 745 | 748 | 749 | 9 |
| 746 | 745 | 748 | 750 | 9 |
| 746 | 745 | 748 | 751 | 9 |
| 747 | 745 | 748 | 749 | 9 |
| 747 | 745 | 748 | 750 | 9 |
| 747 | 745 | 748 | 751 | 9 |
| 745 | 748 | 751 | 752 | 9 |
| 745 | 748 | 751 | 753 | 9 |
| 745 | 748 | 751 | 754 | 9 |
| 749 | 748 | 751 | 752 | 9 |
| 749 | 748 | 751 | 753 | 9 |
| 749 | 748 | 751 | 754 | 9 |
| 750 | 748 | 751 | 752 | 9 |
| 750 | 748 | 751 | 753 | 9 |
| 750 | 748 | 751 | 754 | 9 |
| 748 | 751 | 754 | 755 | 9 |
| 748 | 751 | 754 | 756 | 9 |
| 748 | 751 | 754 | 757 | 9 |
| 752 | 751 | 754 | 755 | 9 |
| 752 | 751 | 754 | 756 | 9 |
| 752 | 751 | 754 | 757 | 9 |
| 753 | 751 | 754 | 755 | 9 |
| 753 | 751 | 754 | 756 | 9 |
| 753 | 751 | 754 | 757 | 9 |
| 731 | 758 | 760 | 761 | 9 |
| 731 | 758 | 760 | 762 | 9 |
| 759 | 758 | 760 | 761 | 9 |
| 759 | 758 | 760 | 762 | 9 |
| 786 | 758 | 760 | 761 | 9 |
| 786 | 758 | 760 | 762 | 9 |



|     |     |     |     |   |
|-----|-----|-----|-----|---|
| 731 | 758 | 786 | 787 | 9 |
| 731 | 758 | 786 | 788 | 9 |
| 731 | 758 | 786 | 791 | 9 |
| 759 | 758 | 786 | 787 | 9 |
| 759 | 758 | 786 | 788 | 9 |
| 759 | 758 | 786 | 791 | 9 |
| 760 | 758 | 786 | 787 | 9 |
| 760 | 758 | 786 | 788 | 9 |
| 760 | 758 | 786 | 791 | 9 |
| 758 | 760 | 762 | 763 | 9 |
| 758 | 760 | 762 | 764 | 9 |
| 761 | 760 | 762 | 763 | 9 |
| 761 | 760 | 762 | 764 | 9 |
| 760 | 762 | 764 | 765 | 9 |
| 760 | 762 | 764 | 766 | 9 |
| 760 | 762 | 764 | 767 | 9 |
| 763 | 762 | 764 | 765 | 9 |
| 763 | 762 | 764 | 766 | 9 |
| 763 | 762 | 764 | 767 | 9 |
| 762 | 764 | 767 | 768 | 9 |
| 762 | 764 | 767 | 769 | 9 |
| 762 | 764 | 767 | 770 | 9 |
| 765 | 764 | 767 | 768 | 9 |
| 765 | 764 | 767 | 769 | 9 |
| 765 | 764 | 767 | 770 | 9 |
| 766 | 764 | 767 | 768 | 9 |
| 766 | 764 | 767 | 769 | 9 |
| 766 | 764 | 767 | 770 | 9 |
| 764 | 767 | 770 | 771 | 9 |
| 764 | 767 | 770 | 772 | 9 |
| 764 | 767 | 770 | 773 | 9 |
| 768 | 767 | 770 | 771 | 9 |
| 768 | 767 | 770 | 772 | 9 |
| 768 | 767 | 770 | 773 | 9 |
| 769 | 767 | 770 | 771 | 9 |
| 769 | 767 | 770 | 772 | 9 |
| 769 | 767 | 770 | 773 | 9 |
| 767 | 770 | 773 | 774 | 9 |
| 767 | 770 | 773 | 778 | 9 |
| 767 | 770 | 773 | 782 | 9 |
| 771 | 770 | 773 | 774 | 9 |
| 771 | 770 | 773 | 778 | 9 |
| 771 | 770 | 773 | 782 | 9 |
| 772 | 770 | 773 | 774 | 9 |
| 772 | 770 | 773 | 778 | 9 |
| 772 | 770 | 773 | 782 | 9 |
| 770 | 773 | 774 | 775 | 9 |
| 770 | 773 | 774 | 776 | 9 |
| 770 | 773 | 774 | 777 | 9 |
| 778 | 773 | 774 | 775 | 9 |
| 778 | 773 | 774 | 776 | 9 |
| 778 | 773 | 774 | 777 | 9 |
| 782 | 773 | 774 | 775 | 9 |
| 782 | 773 | 774 | 776 | 9 |

|     |     |     |     |   |
|-----|-----|-----|-----|---|
| 782 | 773 | 774 | 777 | 9 |
| 770 | 773 | 778 | 779 | 9 |
| 770 | 773 | 778 | 780 | 9 |
| 770 | 773 | 778 | 781 | 9 |
| 774 | 773 | 778 | 779 | 9 |
| 774 | 773 | 778 | 780 | 9 |
| 774 | 773 | 778 | 781 | 9 |
| 782 | 773 | 778 | 779 | 9 |
| 782 | 773 | 778 | 780 | 9 |
| 782 | 773 | 778 | 781 | 9 |
| 770 | 773 | 782 | 783 | 9 |
| 770 | 773 | 782 | 784 | 9 |
| 770 | 773 | 782 | 785 | 9 |
| 774 | 773 | 782 | 783 | 9 |
| 774 | 773 | 782 | 784 | 9 |
| 774 | 773 | 782 | 785 | 9 |
| 778 | 773 | 782 | 783 | 9 |
| 778 | 773 | 782 | 784 | 9 |
| 778 | 773 | 782 | 785 | 9 |
| 758 | 786 | 788 | 789 | 9 |
| 758 | 786 | 788 | 790 | 9 |
| 787 | 786 | 788 | 789 | 9 |
| 787 | 786 | 788 | 790 | 9 |
| 791 | 786 | 788 | 789 | 9 |
| 791 | 786 | 788 | 790 | 9 |
| 758 | 786 | 791 | 792 | 9 |
| 758 | 786 | 791 | 793 | 9 |
| 758 | 786 | 791 | 794 | 9 |
| 787 | 786 | 791 | 792 | 9 |
| 787 | 786 | 791 | 793 | 9 |
| 787 | 786 | 791 | 794 | 9 |
| 788 | 786 | 791 | 792 | 9 |
| 788 | 786 | 791 | 793 | 9 |
| 788 | 786 | 791 | 794 | 9 |
| 786 | 791 | 794 | 795 | 9 |
| 786 | 791 | 794 | 796 | 9 |
| 786 | 791 | 794 | 821 | 9 |
| 792 | 791 | 794 | 795 | 9 |
| 792 | 791 | 794 | 796 | 9 |
| 792 | 791 | 794 | 821 | 9 |
| 793 | 791 | 794 | 795 | 9 |
| 793 | 791 | 794 | 796 | 9 |
| 793 | 791 | 794 | 821 | 9 |
| 791 | 794 | 796 | 797 | 9 |
| 791 | 794 | 796 | 798 | 9 |
| 791 | 794 | 796 | 799 | 9 |
| 795 | 794 | 796 | 797 | 9 |
| 795 | 794 | 796 | 798 | 9 |
| 795 | 794 | 796 | 799 | 9 |
| 821 | 794 | 796 | 797 | 9 |
| 821 | 794 | 796 | 798 | 9 |
| 821 | 794 | 796 | 799 | 9 |
| 791 | 794 | 821 | 822 | 9 |
| 791 | 794 | 821 | 823 | 9 |

|     |     |     |     |   |
|-----|-----|-----|-----|---|
| 791 | 794 | 821 | 849 | 9 |
| 795 | 794 | 821 | 822 | 9 |
| 795 | 794 | 821 | 823 | 9 |
| 795 | 794 | 821 | 849 | 9 |
| 796 | 794 | 821 | 822 | 9 |
| 796 | 794 | 821 | 823 | 9 |
| 796 | 794 | 821 | 849 | 9 |
| 794 | 796 | 799 | 800 | 9 |
| 794 | 796 | 799 | 801 | 9 |
| 794 | 796 | 799 | 802 | 9 |
| 797 | 796 | 799 | 800 | 9 |
| 797 | 796 | 799 | 801 | 9 |
| 797 | 796 | 799 | 802 | 9 |
| 798 | 796 | 799 | 800 | 9 |
| 798 | 796 | 799 | 801 | 9 |
| 798 | 796 | 799 | 802 | 9 |
| 796 | 799 | 802 | 803 | 9 |
| 796 | 799 | 802 | 804 | 9 |
| 796 | 799 | 802 | 805 | 9 |
| 800 | 799 | 802 | 803 | 9 |
| 800 | 799 | 802 | 804 | 9 |
| 800 | 799 | 802 | 805 | 9 |
| 801 | 799 | 802 | 803 | 9 |
| 801 | 799 | 802 | 804 | 9 |
| 801 | 799 | 802 | 805 | 9 |
| 799 | 802 | 805 | 806 | 9 |
| 799 | 802 | 805 | 807 | 9 |
| 799 | 802 | 805 | 808 | 9 |
| 803 | 802 | 805 | 806 | 9 |
| 803 | 802 | 805 | 807 | 9 |
| 803 | 802 | 805 | 808 | 9 |
| 804 | 802 | 805 | 806 | 9 |
| 804 | 802 | 805 | 807 | 9 |
| 804 | 802 | 805 | 808 | 9 |
| 802 | 805 | 808 | 809 | 9 |
| 802 | 805 | 808 | 810 | 9 |
| 802 | 805 | 808 | 811 | 9 |
| 806 | 805 | 808 | 809 | 9 |
| 806 | 805 | 808 | 810 | 9 |
| 806 | 805 | 808 | 811 | 9 |
| 807 | 805 | 808 | 809 | 9 |
| 807 | 805 | 808 | 810 | 9 |
| 807 | 805 | 808 | 811 | 9 |
| 805 | 808 | 811 | 812 | 9 |
| 805 | 808 | 811 | 813 | 9 |
| 805 | 808 | 811 | 814 | 9 |
| 809 | 808 | 811 | 812 | 9 |
| 809 | 808 | 811 | 813 | 9 |
| 809 | 808 | 811 | 814 | 9 |
| 810 | 808 | 811 | 812 | 9 |
| 810 | 808 | 811 | 813 | 9 |
| 810 | 808 | 811 | 814 | 9 |
| 808 | 811 | 814 | 815 | 9 |
| 808 | 811 | 814 | 816 | 9 |

|     |     |     |     |   |
|-----|-----|-----|-----|---|
| 808 | 811 | 814 | 817 | 9 |
| 812 | 811 | 814 | 815 | 9 |
| 812 | 811 | 814 | 816 | 9 |
| 812 | 811 | 814 | 817 | 9 |
| 813 | 811 | 814 | 815 | 9 |
| 813 | 811 | 814 | 816 | 9 |
| 813 | 811 | 814 | 817 | 9 |
| 811 | 814 | 817 | 818 | 9 |
| 811 | 814 | 817 | 819 | 9 |
| 811 | 814 | 817 | 820 | 9 |
| 815 | 814 | 817 | 818 | 9 |
| 815 | 814 | 817 | 819 | 9 |
| 815 | 814 | 817 | 820 | 9 |
| 816 | 814 | 817 | 818 | 9 |
| 816 | 814 | 817 | 819 | 9 |
| 816 | 814 | 817 | 820 | 9 |
| 794 | 821 | 823 | 824 | 9 |
| 794 | 821 | 823 | 825 | 9 |
| 822 | 821 | 823 | 824 | 9 |
| 822 | 821 | 823 | 825 | 9 |
| 849 | 821 | 823 | 824 | 9 |
| 849 | 821 | 823 | 825 | 9 |
| 794 | 821 | 849 | 850 | 9 |
| 794 | 821 | 849 | 851 | 9 |
| 794 | 821 | 849 | 854 | 9 |
| 822 | 821 | 849 | 850 | 9 |
| 822 | 821 | 849 | 851 | 9 |
| 822 | 821 | 849 | 854 | 9 |
| 823 | 821 | 849 | 850 | 9 |
| 823 | 821 | 849 | 851 | 9 |
| 823 | 821 | 849 | 854 | 9 |
| 821 | 823 | 825 | 826 | 9 |
| 821 | 823 | 825 | 827 | 9 |
| 824 | 823 | 825 | 826 | 9 |
| 824 | 823 | 825 | 827 | 9 |
| 823 | 825 | 827 | 828 | 9 |
| 823 | 825 | 827 | 829 | 9 |
| 823 | 825 | 827 | 830 | 9 |
| 826 | 825 | 827 | 828 | 9 |
| 826 | 825 | 827 | 829 | 9 |
| 826 | 825 | 827 | 830 | 9 |
| 825 | 827 | 830 | 831 | 9 |
| 825 | 827 | 830 | 832 | 9 |
| 825 | 827 | 830 | 833 | 9 |
| 828 | 827 | 830 | 831 | 9 |
| 828 | 827 | 830 | 832 | 9 |
| 828 | 827 | 830 | 833 | 9 |
| 829 | 827 | 830 | 831 | 9 |
| 829 | 827 | 830 | 832 | 9 |
| 829 | 827 | 830 | 833 | 9 |
| 827 | 830 | 833 | 834 | 9 |
| 827 | 830 | 833 | 835 | 9 |
| 827 | 830 | 833 | 836 | 9 |
| 831 | 830 | 833 | 834 | 9 |

|     |     |     |     |   |
|-----|-----|-----|-----|---|
| 831 | 830 | 833 | 835 | 9 |
| 831 | 830 | 833 | 836 | 9 |
| 832 | 830 | 833 | 834 | 9 |
| 832 | 830 | 833 | 835 | 9 |
| 832 | 830 | 833 | 836 | 9 |
| 830 | 833 | 836 | 837 | 9 |
| 830 | 833 | 836 | 841 | 9 |
| 830 | 833 | 836 | 845 | 9 |
| 834 | 833 | 836 | 837 | 9 |
| 834 | 833 | 836 | 841 | 9 |
| 834 | 833 | 836 | 845 | 9 |
| 835 | 833 | 836 | 837 | 9 |
| 835 | 833 | 836 | 841 | 9 |
| 835 | 833 | 836 | 845 | 9 |
| 833 | 836 | 837 | 838 | 9 |
| 833 | 836 | 837 | 839 | 9 |
| 833 | 836 | 837 | 840 | 9 |
| 841 | 836 | 837 | 838 | 9 |
| 841 | 836 | 837 | 839 | 9 |
| 841 | 836 | 837 | 840 | 9 |
| 845 | 836 | 837 | 838 | 9 |
| 845 | 836 | 837 | 839 | 9 |
| 845 | 836 | 837 | 840 | 9 |
| 833 | 836 | 841 | 842 | 9 |
| 833 | 836 | 841 | 843 | 9 |
| 833 | 836 | 841 | 844 | 9 |
| 837 | 836 | 841 | 842 | 9 |
| 837 | 836 | 841 | 843 | 9 |
| 837 | 836 | 841 | 844 | 9 |
| 845 | 836 | 841 | 842 | 9 |
| 845 | 836 | 841 | 843 | 9 |
| 845 | 836 | 841 | 844 | 9 |
| 833 | 836 | 845 | 846 | 9 |
| 833 | 836 | 845 | 847 | 9 |
| 833 | 836 | 845 | 848 | 9 |
| 837 | 836 | 845 | 846 | 9 |
| 837 | 836 | 845 | 847 | 9 |
| 837 | 836 | 845 | 848 | 9 |
| 841 | 836 | 845 | 846 | 9 |
| 841 | 836 | 845 | 847 | 9 |
| 841 | 836 | 845 | 848 | 9 |
| 821 | 849 | 851 | 852 | 9 |
| 821 | 849 | 851 | 853 | 9 |
| 850 | 849 | 851 | 852 | 9 |
| 850 | 849 | 851 | 853 | 9 |
| 854 | 849 | 851 | 852 | 9 |
| 854 | 849 | 851 | 853 | 9 |
| 821 | 849 | 854 | 855 | 9 |
| 821 | 849 | 854 | 856 | 9 |
| 821 | 849 | 854 | 857 | 9 |
| 850 | 849 | 854 | 855 | 9 |
| 850 | 849 | 854 | 856 | 9 |
| 850 | 849 | 854 | 857 | 9 |
| 851 | 849 | 854 | 855 | 9 |

|     |     |     |     |   |
|-----|-----|-----|-----|---|
| 851 | 849 | 854 | 856 | 9 |
| 851 | 849 | 854 | 857 | 9 |
| 849 | 854 | 857 | 858 | 9 |
| 849 | 854 | 857 | 859 | 9 |
| 849 | 854 | 857 | 884 | 9 |
| 855 | 854 | 857 | 858 | 9 |
| 855 | 854 | 857 | 859 | 9 |
| 855 | 854 | 857 | 884 | 9 |
| 856 | 854 | 857 | 858 | 9 |
| 856 | 854 | 857 | 859 | 9 |
| 856 | 854 | 857 | 884 | 9 |
| 854 | 857 | 859 | 860 | 9 |
| 854 | 857 | 859 | 861 | 9 |
| 854 | 857 | 859 | 862 | 9 |
| 858 | 857 | 859 | 860 | 9 |
| 858 | 857 | 859 | 861 | 9 |
| 858 | 857 | 859 | 862 | 9 |
| 884 | 857 | 859 | 860 | 9 |
| 884 | 857 | 859 | 861 | 9 |
| 884 | 857 | 859 | 862 | 9 |
| 854 | 857 | 884 | 885 | 9 |
| 854 | 857 | 884 | 886 | 9 |
| 854 | 857 | 884 | 912 | 9 |
| 858 | 857 | 884 | 885 | 9 |
| 858 | 857 | 884 | 886 | 9 |
| 858 | 857 | 884 | 912 | 9 |
| 859 | 857 | 884 | 885 | 9 |
| 859 | 857 | 884 | 886 | 9 |
| 859 | 857 | 884 | 912 | 9 |
| 857 | 859 | 862 | 863 | 9 |
| 857 | 859 | 862 | 864 | 9 |
| 857 | 859 | 862 | 865 | 9 |
| 860 | 859 | 862 | 863 | 9 |
| 860 | 859 | 862 | 864 | 9 |
| 860 | 859 | 862 | 865 | 9 |
| 861 | 859 | 862 | 863 | 9 |
| 861 | 859 | 862 | 864 | 9 |
| 861 | 859 | 862 | 865 | 9 |
| 859 | 862 | 865 | 866 | 9 |
| 859 | 862 | 865 | 867 | 9 |
| 859 | 862 | 865 | 868 | 9 |
| 863 | 862 | 865 | 866 | 9 |
| 863 | 862 | 865 | 867 | 9 |
| 863 | 862 | 865 | 868 | 9 |
| 864 | 862 | 865 | 866 | 9 |
| 864 | 862 | 865 | 867 | 9 |
| 864 | 862 | 865 | 868 | 9 |
| 862 | 865 | 868 | 869 | 9 |
| 862 | 865 | 868 | 870 | 9 |
| 862 | 865 | 868 | 871 | 9 |
| 866 | 865 | 868 | 869 | 9 |
| 866 | 865 | 868 | 870 | 9 |
| 866 | 865 | 868 | 871 | 9 |
| 867 | 865 | 868 | 869 | 9 |

|     |     |     |     |   |
|-----|-----|-----|-----|---|
| 867 | 865 | 868 | 870 | 9 |
| 867 | 865 | 868 | 871 | 9 |
| 865 | 868 | 871 | 872 | 9 |
| 865 | 868 | 871 | 873 | 9 |
| 865 | 868 | 871 | 874 | 9 |
| 869 | 868 | 871 | 872 | 9 |
| 869 | 868 | 871 | 873 | 9 |
| 869 | 868 | 871 | 874 | 9 |
| 870 | 868 | 871 | 872 | 9 |
| 870 | 868 | 871 | 873 | 9 |
| 870 | 868 | 871 | 874 | 9 |
| 868 | 871 | 874 | 875 | 9 |
| 868 | 871 | 874 | 876 | 9 |
| 868 | 871 | 874 | 877 | 9 |
| 872 | 871 | 874 | 875 | 9 |
| 872 | 871 | 874 | 876 | 9 |
| 872 | 871 | 874 | 877 | 9 |
| 873 | 871 | 874 | 875 | 9 |
| 873 | 871 | 874 | 876 | 9 |
| 873 | 871 | 874 | 877 | 9 |
| 871 | 874 | 877 | 878 | 9 |
| 871 | 874 | 877 | 879 | 9 |
| 871 | 874 | 877 | 880 | 9 |
| 875 | 874 | 877 | 878 | 9 |
| 875 | 874 | 877 | 879 | 9 |
| 875 | 874 | 877 | 880 | 9 |
| 876 | 874 | 877 | 878 | 9 |
| 876 | 874 | 877 | 879 | 9 |
| 876 | 874 | 877 | 880 | 9 |
| 874 | 877 | 880 | 881 | 9 |
| 874 | 877 | 880 | 882 | 9 |
| 874 | 877 | 880 | 883 | 9 |
| 878 | 877 | 880 | 881 | 9 |
| 878 | 877 | 880 | 882 | 9 |
| 878 | 877 | 880 | 883 | 9 |
| 879 | 877 | 880 | 881 | 9 |
| 879 | 877 | 880 | 882 | 9 |
| 879 | 877 | 880 | 883 | 9 |
| 857 | 884 | 886 | 887 | 9 |
| 857 | 884 | 886 | 888 | 9 |
| 885 | 884 | 886 | 887 | 9 |
| 885 | 884 | 886 | 888 | 9 |
| 912 | 884 | 886 | 887 | 9 |
| 912 | 884 | 886 | 888 | 9 |
| 857 | 884 | 912 | 913 | 9 |
| 857 | 884 | 912 | 914 | 9 |
| 857 | 884 | 912 | 917 | 9 |
| 885 | 884 | 912 | 913 | 9 |
| 885 | 884 | 912 | 914 | 9 |
| 885 | 884 | 912 | 917 | 9 |
| 886 | 884 | 912 | 913 | 9 |
| 886 | 884 | 912 | 914 | 9 |
| 886 | 884 | 912 | 917 | 9 |
| 884 | 886 | 888 | 889 | 9 |

|     |     |     |     |   |
|-----|-----|-----|-----|---|
| 884 | 886 | 888 | 890 | 9 |
| 887 | 886 | 888 | 889 | 9 |
| 887 | 886 | 888 | 890 | 9 |
| 886 | 888 | 890 | 891 | 9 |
| 886 | 888 | 890 | 892 | 9 |
| 886 | 888 | 890 | 893 | 9 |
| 889 | 888 | 890 | 891 | 9 |
| 889 | 888 | 890 | 892 | 9 |
| 889 | 888 | 890 | 893 | 9 |
| 888 | 890 | 893 | 894 | 9 |
| 888 | 890 | 893 | 895 | 9 |
| 888 | 890 | 893 | 896 | 9 |
| 891 | 890 | 893 | 894 | 9 |
| 891 | 890 | 893 | 895 | 9 |
| 891 | 890 | 893 | 896 | 9 |
| 892 | 890 | 893 | 894 | 9 |
| 892 | 890 | 893 | 895 | 9 |
| 892 | 890 | 893 | 896 | 9 |
| 890 | 893 | 896 | 897 | 9 |
| 890 | 893 | 896 | 898 | 9 |
| 890 | 893 | 896 | 899 | 9 |
| 894 | 893 | 896 | 897 | 9 |
| 894 | 893 | 896 | 898 | 9 |
| 894 | 893 | 896 | 899 | 9 |
| 895 | 893 | 896 | 897 | 9 |
| 895 | 893 | 896 | 898 | 9 |
| 895 | 893 | 896 | 899 | 9 |
| 893 | 896 | 899 | 900 | 9 |
| 893 | 896 | 899 | 904 | 9 |
| 893 | 896 | 899 | 908 | 9 |
| 897 | 896 | 899 | 900 | 9 |
| 897 | 896 | 899 | 904 | 9 |
| 897 | 896 | 899 | 908 | 9 |
| 898 | 896 | 899 | 900 | 9 |
| 898 | 896 | 899 | 904 | 9 |
| 898 | 896 | 899 | 908 | 9 |
| 896 | 899 | 900 | 901 | 9 |
| 896 | 899 | 900 | 902 | 9 |
| 896 | 899 | 900 | 903 | 9 |
| 904 | 899 | 900 | 901 | 9 |
| 904 | 899 | 900 | 902 | 9 |
| 904 | 899 | 900 | 903 | 9 |
| 908 | 899 | 900 | 901 | 9 |
| 908 | 899 | 900 | 902 | 9 |
| 908 | 899 | 900 | 903 | 9 |
| 896 | 899 | 904 | 905 | 9 |
| 896 | 899 | 904 | 906 | 9 |
| 896 | 899 | 904 | 907 | 9 |
| 900 | 899 | 904 | 905 | 9 |
| 900 | 899 | 904 | 906 | 9 |
| 900 | 899 | 904 | 907 | 9 |
| 908 | 899 | 904 | 905 | 9 |
| 908 | 899 | 904 | 906 | 9 |
| 908 | 899 | 904 | 907 | 9 |



|     |     |     |     |   |
|-----|-----|-----|-----|---|
| 896 | 899 | 908 | 909 | 9 |
| 896 | 899 | 908 | 910 | 9 |
| 896 | 899 | 908 | 911 | 9 |
| 900 | 899 | 908 | 909 | 9 |
| 900 | 899 | 908 | 910 | 9 |
| 900 | 899 | 908 | 911 | 9 |
| 904 | 899 | 908 | 909 | 9 |
| 904 | 899 | 908 | 910 | 9 |
| 904 | 899 | 908 | 911 | 9 |
| 884 | 912 | 914 | 915 | 9 |
| 884 | 912 | 914 | 916 | 9 |
| 913 | 912 | 914 | 915 | 9 |
| 913 | 912 | 914 | 916 | 9 |
| 917 | 912 | 914 | 915 | 9 |
| 917 | 912 | 914 | 916 | 9 |
| 884 | 912 | 917 | 918 | 9 |
| 884 | 912 | 917 | 919 | 9 |
| 884 | 912 | 917 | 920 | 9 |
| 913 | 912 | 917 | 918 | 9 |
| 913 | 912 | 917 | 919 | 9 |
| 913 | 912 | 917 | 920 | 9 |
| 914 | 912 | 917 | 918 | 9 |
| 914 | 912 | 917 | 919 | 9 |
| 914 | 912 | 917 | 920 | 9 |
| 912 | 917 | 920 | 921 | 9 |
| 912 | 917 | 920 | 922 | 9 |
| 912 | 917 | 920 | 947 | 9 |
| 918 | 917 | 920 | 921 | 9 |
| 918 | 917 | 920 | 922 | 9 |
| 918 | 917 | 920 | 947 | 9 |
| 919 | 917 | 920 | 921 | 9 |
| 919 | 917 | 920 | 922 | 9 |
| 919 | 917 | 920 | 947 | 9 |
| 917 | 920 | 922 | 923 | 9 |
| 917 | 920 | 922 | 924 | 9 |
| 917 | 920 | 922 | 925 | 9 |
| 921 | 920 | 922 | 923 | 9 |
| 921 | 920 | 922 | 924 | 9 |
| 921 | 920 | 922 | 925 | 9 |
| 947 | 920 | 922 | 923 | 9 |
| 947 | 920 | 922 | 924 | 9 |
| 947 | 920 | 922 | 925 | 9 |
| 917 | 920 | 947 | 948 | 9 |
| 917 | 920 | 947 | 949 | 9 |
| 917 | 920 | 947 | 975 | 9 |
| 921 | 920 | 947 | 948 | 9 |
| 921 | 920 | 947 | 949 | 9 |
| 921 | 920 | 947 | 975 | 9 |
| 922 | 920 | 947 | 948 | 9 |
| 922 | 920 | 947 | 949 | 9 |
| 922 | 920 | 947 | 975 | 9 |
| 920 | 922 | 925 | 926 | 9 |
| 920 | 922 | 925 | 927 | 9 |
| 920 | 922 | 925 | 928 | 9 |

|     |     |     |     |   |
|-----|-----|-----|-----|---|
| 923 | 922 | 925 | 926 | 9 |
| 923 | 922 | 925 | 927 | 9 |
| 923 | 922 | 925 | 928 | 9 |
| 924 | 922 | 925 | 926 | 9 |
| 924 | 922 | 925 | 927 | 9 |
| 924 | 922 | 925 | 928 | 9 |
| 922 | 925 | 928 | 929 | 9 |
| 922 | 925 | 928 | 930 | 9 |
| 922 | 925 | 928 | 931 | 9 |
| 926 | 925 | 928 | 929 | 9 |
| 926 | 925 | 928 | 930 | 9 |
| 926 | 925 | 928 | 931 | 9 |
| 927 | 925 | 928 | 929 | 9 |
| 927 | 925 | 928 | 930 | 9 |
| 927 | 925 | 928 | 931 | 9 |
| 925 | 928 | 931 | 932 | 9 |
| 925 | 928 | 931 | 933 | 9 |
| 925 | 928 | 931 | 934 | 9 |
| 929 | 928 | 931 | 932 | 9 |
| 929 | 928 | 931 | 933 | 9 |
| 929 | 928 | 931 | 934 | 9 |
| 930 | 928 | 931 | 932 | 9 |
| 930 | 928 | 931 | 933 | 9 |
| 930 | 928 | 931 | 934 | 9 |
| 928 | 931 | 934 | 935 | 9 |
| 928 | 931 | 934 | 936 | 9 |
| 928 | 931 | 934 | 937 | 9 |
| 932 | 931 | 934 | 935 | 9 |
| 932 | 931 | 934 | 936 | 9 |
| 932 | 931 | 934 | 937 | 9 |
| 933 | 931 | 934 | 935 | 9 |
| 933 | 931 | 934 | 936 | 9 |
| 933 | 931 | 934 | 937 | 9 |
| 931 | 934 | 937 | 938 | 9 |
| 931 | 934 | 937 | 939 | 9 |
| 931 | 934 | 937 | 940 | 9 |
| 935 | 934 | 937 | 938 | 9 |
| 935 | 934 | 937 | 939 | 9 |
| 935 | 934 | 937 | 940 | 9 |
| 936 | 934 | 937 | 938 | 9 |
| 936 | 934 | 937 | 939 | 9 |
| 936 | 934 | 937 | 940 | 9 |
| 934 | 937 | 940 | 941 | 9 |
| 934 | 937 | 940 | 942 | 9 |
| 934 | 937 | 940 | 943 | 9 |
| 938 | 937 | 940 | 941 | 9 |
| 938 | 937 | 940 | 942 | 9 |
| 938 | 937 | 940 | 943 | 9 |
| 939 | 937 | 940 | 941 | 9 |
| 939 | 937 | 940 | 942 | 9 |
| 939 | 937 | 940 | 943 | 9 |
| 937 | 940 | 943 | 944 | 9 |
| 937 | 940 | 943 | 945 | 9 |
| 937 | 940 | 943 | 946 | 9 |

|     |     |     |     |   |
|-----|-----|-----|-----|---|
| 941 | 940 | 943 | 944 | 9 |
| 941 | 940 | 943 | 945 | 9 |
| 941 | 940 | 943 | 946 | 9 |
| 942 | 940 | 943 | 944 | 9 |
| 942 | 940 | 943 | 945 | 9 |
| 942 | 940 | 943 | 946 | 9 |
| 920 | 947 | 949 | 950 | 9 |
| 920 | 947 | 949 | 951 | 9 |
| 948 | 947 | 949 | 950 | 9 |
| 948 | 947 | 949 | 951 | 9 |
| 975 | 947 | 949 | 950 | 9 |
| 975 | 947 | 949 | 951 | 9 |
| 920 | 947 | 975 | 976 | 9 |
| 920 | 947 | 975 | 977 | 9 |
| 920 | 947 | 975 | 980 | 9 |
| 948 | 947 | 975 | 976 | 9 |
| 948 | 947 | 975 | 977 | 9 |
| 948 | 947 | 975 | 980 | 9 |
| 949 | 947 | 975 | 976 | 9 |
| 949 | 947 | 975 | 977 | 9 |
| 949 | 947 | 975 | 980 | 9 |
| 947 | 949 | 951 | 952 | 9 |
| 947 | 949 | 951 | 953 | 9 |
| 950 | 949 | 951 | 952 | 9 |
| 950 | 949 | 951 | 953 | 9 |
| 949 | 951 | 953 | 954 | 9 |
| 949 | 951 | 953 | 955 | 9 |
| 949 | 951 | 953 | 956 | 9 |
| 952 | 951 | 953 | 954 | 9 |
| 952 | 951 | 953 | 955 | 9 |
| 952 | 951 | 953 | 956 | 9 |
| 951 | 953 | 956 | 957 | 9 |
| 951 | 953 | 956 | 958 | 9 |
| 951 | 953 | 956 | 959 | 9 |
| 954 | 953 | 956 | 957 | 9 |
| 954 | 953 | 956 | 958 | 9 |
| 954 | 953 | 956 | 959 | 9 |
| 955 | 953 | 956 | 957 | 9 |
| 955 | 953 | 956 | 958 | 9 |
| 955 | 953 | 956 | 959 | 9 |
| 953 | 956 | 959 | 960 | 9 |
| 953 | 956 | 959 | 961 | 9 |
| 953 | 956 | 959 | 962 | 9 |
| 957 | 956 | 959 | 960 | 9 |
| 957 | 956 | 959 | 961 | 9 |
| 957 | 956 | 959 | 962 | 9 |
| 958 | 956 | 959 | 960 | 9 |
| 958 | 956 | 959 | 961 | 9 |
| 958 | 956 | 959 | 962 | 9 |
| 956 | 959 | 962 | 963 | 9 |
| 956 | 959 | 962 | 967 | 9 |
| 956 | 959 | 962 | 971 | 9 |
| 960 | 959 | 962 | 963 | 9 |
| 960 | 959 | 962 | 967 | 9 |

|     |     |     |      |   |
|-----|-----|-----|------|---|
| 960 | 959 | 962 | 971  | 9 |
| 961 | 959 | 962 | 963  | 9 |
| 961 | 959 | 962 | 967  | 9 |
| 961 | 959 | 962 | 971  | 9 |
| 959 | 962 | 963 | 964  | 9 |
| 959 | 962 | 963 | 965  | 9 |
| 959 | 962 | 963 | 966  | 9 |
| 967 | 962 | 963 | 964  | 9 |
| 967 | 962 | 963 | 965  | 9 |
| 967 | 962 | 963 | 966  | 9 |
| 971 | 962 | 963 | 964  | 9 |
| 971 | 962 | 963 | 965  | 9 |
| 971 | 962 | 963 | 966  | 9 |
| 959 | 962 | 967 | 968  | 9 |
| 959 | 962 | 967 | 969  | 9 |
| 959 | 962 | 967 | 970  | 9 |
| 963 | 962 | 967 | 968  | 9 |
| 963 | 962 | 967 | 969  | 9 |
| 963 | 962 | 967 | 970  | 9 |
| 971 | 962 | 967 | 968  | 9 |
| 971 | 962 | 967 | 969  | 9 |
| 971 | 962 | 967 | 970  | 9 |
| 959 | 962 | 971 | 972  | 9 |
| 959 | 962 | 971 | 973  | 9 |
| 959 | 962 | 971 | 974  | 9 |
| 963 | 962 | 971 | 972  | 9 |
| 963 | 962 | 971 | 973  | 9 |
| 963 | 962 | 971 | 974  | 9 |
| 967 | 962 | 971 | 972  | 9 |
| 967 | 962 | 971 | 973  | 9 |
| 967 | 962 | 971 | 974  | 9 |
| 947 | 975 | 977 | 978  | 9 |
| 947 | 975 | 977 | 979  | 9 |
| 976 | 975 | 977 | 978  | 9 |
| 976 | 975 | 977 | 979  | 9 |
| 980 | 975 | 977 | 978  | 9 |
| 980 | 975 | 977 | 979  | 9 |
| 947 | 975 | 980 | 981  | 9 |
| 947 | 975 | 980 | 982  | 9 |
| 947 | 975 | 980 | 983  | 9 |
| 976 | 975 | 980 | 981  | 9 |
| 976 | 975 | 980 | 982  | 9 |
| 976 | 975 | 980 | 983  | 9 |
| 977 | 975 | 980 | 981  | 9 |
| 977 | 975 | 980 | 982  | 9 |
| 977 | 975 | 980 | 983  | 9 |
| 975 | 980 | 983 | 984  | 9 |
| 975 | 980 | 983 | 985  | 9 |
| 975 | 980 | 983 | 1010 | 9 |
| 981 | 980 | 983 | 984  | 9 |
| 981 | 980 | 983 | 985  | 9 |
| 981 | 980 | 983 | 1010 | 9 |
| 982 | 980 | 983 | 984  | 9 |
| 982 | 980 | 983 | 985  | 9 |

|      |     |      |      |   |
|------|-----|------|------|---|
| 982  | 980 | 983  | 1010 | 9 |
| 980  | 983 | 985  | 986  | 9 |
| 980  | 983 | 985  | 987  | 9 |
| 980  | 983 | 985  | 988  | 9 |
| 984  | 983 | 985  | 986  | 9 |
| 984  | 983 | 985  | 987  | 9 |
| 984  | 983 | 985  | 988  | 9 |
| 1010 | 983 | 985  | 986  | 9 |
| 1010 | 983 | 985  | 987  | 9 |
| 1010 | 983 | 985  | 988  | 9 |
| 980  | 983 | 1010 | 1011 | 9 |
| 980  | 983 | 1010 | 1012 | 9 |
| 980  | 983 | 1010 | 1038 | 9 |
| 984  | 983 | 1010 | 1011 | 9 |
| 984  | 983 | 1010 | 1012 | 9 |
| 984  | 983 | 1010 | 1038 | 9 |
| 985  | 983 | 1010 | 1011 | 9 |
| 985  | 983 | 1010 | 1012 | 9 |
| 985  | 983 | 1010 | 1038 | 9 |
| 983  | 985 | 988  | 989  | 9 |
| 983  | 985 | 988  | 990  | 9 |
| 983  | 985 | 988  | 991  | 9 |
| 986  | 985 | 988  | 989  | 9 |
| 986  | 985 | 988  | 990  | 9 |
| 986  | 985 | 988  | 991  | 9 |
| 987  | 985 | 988  | 989  | 9 |
| 987  | 985 | 988  | 990  | 9 |
| 987  | 985 | 988  | 991  | 9 |
| 985  | 988 | 991  | 992  | 9 |
| 985  | 988 | 991  | 993  | 9 |
| 985  | 988 | 991  | 994  | 9 |
| 989  | 988 | 991  | 992  | 9 |
| 989  | 988 | 991  | 993  | 9 |
| 989  | 988 | 991  | 994  | 9 |
| 990  | 988 | 991  | 992  | 9 |
| 990  | 988 | 991  | 993  | 9 |
| 990  | 988 | 991  | 994  | 9 |
| 988  | 991 | 994  | 995  | 9 |
| 988  | 991 | 994  | 996  | 9 |
| 988  | 991 | 994  | 997  | 9 |
| 992  | 991 | 994  | 995  | 9 |
| 992  | 991 | 994  | 996  | 9 |
| 992  | 991 | 994  | 997  | 9 |
| 993  | 991 | 994  | 995  | 9 |
| 993  | 991 | 994  | 996  | 9 |
| 993  | 991 | 994  | 997  | 9 |
| 991  | 994 | 997  | 998  | 9 |
| 991  | 994 | 997  | 999  | 9 |
| 991  | 994 | 997  | 1000 | 9 |
| 995  | 994 | 997  | 998  | 9 |
| 995  | 994 | 997  | 999  | 9 |
| 995  | 994 | 997  | 1000 | 9 |
| 996  | 994 | 997  | 998  | 9 |
| 996  | 994 | 997  | 999  | 9 |

|      |      |      |      |   |
|------|------|------|------|---|
| 996  | 994  | 997  | 1000 | 9 |
| 994  | 997  | 1000 | 1001 | 9 |
| 994  | 997  | 1000 | 1002 | 9 |
| 994  | 997  | 1000 | 1003 | 9 |
| 998  | 997  | 1000 | 1001 | 9 |
| 998  | 997  | 1000 | 1002 | 9 |
| 998  | 997  | 1000 | 1003 | 9 |
| 999  | 997  | 1000 | 1001 | 9 |
| 999  | 997  | 1000 | 1002 | 9 |
| 999  | 997  | 1000 | 1003 | 9 |
| 997  | 1000 | 1003 | 1004 | 9 |
| 997  | 1000 | 1003 | 1005 | 9 |
| 997  | 1000 | 1003 | 1006 | 9 |
| 1001 | 1000 | 1003 | 1004 | 9 |
| 1001 | 1000 | 1003 | 1005 | 9 |
| 1001 | 1000 | 1003 | 1006 | 9 |
| 1002 | 1000 | 1003 | 1004 | 9 |
| 1002 | 1000 | 1003 | 1005 | 9 |
| 1002 | 1000 | 1003 | 1006 | 9 |
| 1000 | 1003 | 1006 | 1007 | 9 |
| 1000 | 1003 | 1006 | 1008 | 9 |
| 1000 | 1003 | 1006 | 1009 | 9 |
| 1004 | 1003 | 1006 | 1007 | 9 |
| 1004 | 1003 | 1006 | 1008 | 9 |
| 1004 | 1003 | 1006 | 1009 | 9 |
| 1005 | 1003 | 1006 | 1007 | 9 |
| 1005 | 1003 | 1006 | 1008 | 9 |
| 1005 | 1003 | 1006 | 1009 | 9 |
| 983  | 1010 | 1012 | 1013 | 9 |
| 983  | 1010 | 1012 | 1014 | 9 |
| 1011 | 1010 | 1012 | 1013 | 9 |
| 1011 | 1010 | 1012 | 1014 | 9 |
| 1038 | 1010 | 1012 | 1013 | 9 |
| 1038 | 1010 | 1012 | 1014 | 9 |
| 983  | 1010 | 1038 | 1039 | 9 |
| 983  | 1010 | 1038 | 1040 | 9 |
| 983  | 1010 | 1038 | 1043 | 9 |
| 1011 | 1010 | 1038 | 1039 | 9 |
| 1011 | 1010 | 1038 | 1040 | 9 |
| 1011 | 1010 | 1038 | 1043 | 9 |
| 1012 | 1010 | 1038 | 1039 | 9 |
| 1012 | 1010 | 1038 | 1040 | 9 |
| 1012 | 1010 | 1038 | 1043 | 9 |
| 1010 | 1012 | 1014 | 1015 | 9 |
| 1010 | 1012 | 1014 | 1016 | 9 |
| 1013 | 1012 | 1014 | 1015 | 9 |
| 1013 | 1012 | 1014 | 1016 | 9 |
| 1012 | 1014 | 1016 | 1017 | 9 |
| 1012 | 1014 | 1016 | 1018 | 9 |
| 1012 | 1014 | 1016 | 1019 | 9 |
| 1015 | 1014 | 1016 | 1017 | 9 |
| 1015 | 1014 | 1016 | 1018 | 9 |
| 1015 | 1014 | 1016 | 1019 | 9 |
| 1014 | 1016 | 1019 | 1020 | 9 |

|      |      |      |      |   |
|------|------|------|------|---|
| 1014 | 1016 | 1019 | 1021 | 9 |
| 1014 | 1016 | 1019 | 1022 | 9 |
| 1017 | 1016 | 1019 | 1020 | 9 |
| 1017 | 1016 | 1019 | 1021 | 9 |
| 1017 | 1016 | 1019 | 1022 | 9 |
| 1018 | 1016 | 1019 | 1020 | 9 |
| 1018 | 1016 | 1019 | 1021 | 9 |
| 1018 | 1016 | 1019 | 1022 | 9 |
| 1016 | 1019 | 1022 | 1023 | 9 |
| 1016 | 1019 | 1022 | 1024 | 9 |
| 1016 | 1019 | 1022 | 1025 | 9 |
| 1020 | 1019 | 1022 | 1023 | 9 |
| 1020 | 1019 | 1022 | 1024 | 9 |
| 1020 | 1019 | 1022 | 1025 | 9 |
| 1021 | 1019 | 1022 | 1023 | 9 |
| 1021 | 1019 | 1022 | 1024 | 9 |
| 1021 | 1019 | 1022 | 1025 | 9 |
| 1019 | 1022 | 1025 | 1026 | 9 |
| 1019 | 1022 | 1025 | 1030 | 9 |
| 1019 | 1022 | 1025 | 1034 | 9 |
| 1023 | 1022 | 1025 | 1026 | 9 |
| 1023 | 1022 | 1025 | 1030 | 9 |
| 1023 | 1022 | 1025 | 1034 | 9 |
| 1024 | 1022 | 1025 | 1026 | 9 |
| 1024 | 1022 | 1025 | 1030 | 9 |
| 1024 | 1022 | 1025 | 1034 | 9 |
| 1022 | 1025 | 1026 | 1027 | 9 |
| 1022 | 1025 | 1026 | 1028 | 9 |
| 1022 | 1025 | 1026 | 1029 | 9 |
| 1030 | 1025 | 1026 | 1027 | 9 |
| 1030 | 1025 | 1026 | 1028 | 9 |
| 1030 | 1025 | 1026 | 1029 | 9 |
| 1034 | 1025 | 1026 | 1027 | 9 |
| 1034 | 1025 | 1026 | 1028 | 9 |
| 1034 | 1025 | 1026 | 1029 | 9 |
| 1022 | 1025 | 1030 | 1031 | 9 |
| 1022 | 1025 | 1030 | 1032 | 9 |
| 1022 | 1025 | 1030 | 1033 | 9 |
| 1026 | 1025 | 1030 | 1031 | 9 |
| 1026 | 1025 | 1030 | 1032 | 9 |
| 1026 | 1025 | 1030 | 1033 | 9 |
| 1034 | 1025 | 1030 | 1031 | 9 |
| 1034 | 1025 | 1030 | 1032 | 9 |
| 1034 | 1025 | 1030 | 1033 | 9 |
| 1022 | 1025 | 1034 | 1035 | 9 |
| 1022 | 1025 | 1034 | 1036 | 9 |
| 1022 | 1025 | 1034 | 1037 | 9 |
| 1026 | 1025 | 1034 | 1035 | 9 |
| 1026 | 1025 | 1034 | 1036 | 9 |
| 1026 | 1025 | 1034 | 1037 | 9 |
| 1030 | 1025 | 1034 | 1035 | 9 |
| 1030 | 1025 | 1034 | 1036 | 9 |
| 1030 | 1025 | 1034 | 1037 | 9 |
| 1010 | 1038 | 1040 | 1041 | 9 |

|      |      |      |      |   |
|------|------|------|------|---|
| 1010 | 1038 | 1040 | 1042 | 9 |
| 1039 | 1038 | 1040 | 1041 | 9 |
| 1039 | 1038 | 1040 | 1042 | 9 |
| 1043 | 1038 | 1040 | 1041 | 9 |
| 1043 | 1038 | 1040 | 1042 | 9 |
| 1010 | 1038 | 1043 | 1044 | 9 |
| 1010 | 1038 | 1043 | 1045 | 9 |
| 1010 | 1038 | 1043 | 1046 | 9 |
| 1039 | 1038 | 1043 | 1044 | 9 |
| 1039 | 1038 | 1043 | 1045 | 9 |
| 1039 | 1038 | 1043 | 1046 | 9 |
| 1040 | 1038 | 1043 | 1044 | 9 |
| 1040 | 1038 | 1043 | 1045 | 9 |
| 1040 | 1038 | 1043 | 1046 | 9 |
| 1038 | 1043 | 1046 | 1047 | 9 |
| 1038 | 1043 | 1046 | 1048 | 9 |
| 1038 | 1043 | 1046 | 1073 | 9 |
| 1044 | 1043 | 1046 | 1047 | 9 |
| 1044 | 1043 | 1046 | 1048 | 9 |
| 1044 | 1043 | 1046 | 1073 | 9 |
| 1045 | 1043 | 1046 | 1047 | 9 |
| 1045 | 1043 | 1046 | 1048 | 9 |
| 1045 | 1043 | 1046 | 1073 | 9 |
| 1043 | 1046 | 1048 | 1049 | 9 |
| 1043 | 1046 | 1048 | 1050 | 9 |
| 1043 | 1046 | 1048 | 1051 | 9 |
| 1047 | 1046 | 1048 | 1049 | 9 |
| 1047 | 1046 | 1048 | 1050 | 9 |
| 1047 | 1046 | 1048 | 1051 | 9 |
| 1073 | 1046 | 1048 | 1049 | 9 |
| 1073 | 1046 | 1048 | 1050 | 9 |
| 1073 | 1046 | 1048 | 1051 | 9 |
| 1043 | 1046 | 1073 | 1074 | 9 |
| 1043 | 1046 | 1073 | 1075 | 9 |
| 1043 | 1046 | 1073 | 1101 | 9 |
| 1047 | 1046 | 1073 | 1074 | 9 |
| 1047 | 1046 | 1073 | 1075 | 9 |
| 1047 | 1046 | 1073 | 1101 | 9 |
| 1048 | 1046 | 1073 | 1074 | 9 |
| 1048 | 1046 | 1073 | 1075 | 9 |
| 1048 | 1046 | 1073 | 1101 | 9 |
| 1046 | 1048 | 1051 | 1052 | 9 |
| 1046 | 1048 | 1051 | 1053 | 9 |
| 1046 | 1048 | 1051 | 1054 | 9 |
| 1049 | 1048 | 1051 | 1052 | 9 |
| 1049 | 1048 | 1051 | 1053 | 9 |
| 1049 | 1048 | 1051 | 1054 | 9 |
| 1050 | 1048 | 1051 | 1052 | 9 |
| 1050 | 1048 | 1051 | 1053 | 9 |
| 1050 | 1048 | 1051 | 1054 | 9 |
| 1048 | 1051 | 1054 | 1055 | 9 |
| 1048 | 1051 | 1054 | 1056 | 9 |
| 1048 | 1051 | 1054 | 1057 | 9 |
| 1052 | 1051 | 1054 | 1055 | 9 |



|      |      |      |      |   |
|------|------|------|------|---|
| 1052 | 1051 | 1054 | 1056 | 9 |
| 1052 | 1051 | 1054 | 1057 | 9 |
| 1053 | 1051 | 1054 | 1055 | 9 |
| 1053 | 1051 | 1054 | 1056 | 9 |
| 1053 | 1051 | 1054 | 1057 | 9 |
| 1051 | 1054 | 1057 | 1058 | 9 |
| 1051 | 1054 | 1057 | 1059 | 9 |
| 1051 | 1054 | 1057 | 1060 | 9 |
| 1055 | 1054 | 1057 | 1058 | 9 |
| 1055 | 1054 | 1057 | 1059 | 9 |
| 1055 | 1054 | 1057 | 1060 | 9 |
| 1056 | 1054 | 1057 | 1058 | 9 |
| 1056 | 1054 | 1057 | 1059 | 9 |
| 1056 | 1054 | 1057 | 1060 | 9 |
| 1054 | 1057 | 1060 | 1061 | 9 |
| 1054 | 1057 | 1060 | 1062 | 9 |
| 1054 | 1057 | 1060 | 1063 | 9 |
| 1058 | 1057 | 1060 | 1061 | 9 |
| 1058 | 1057 | 1060 | 1062 | 9 |
| 1058 | 1057 | 1060 | 1063 | 9 |
| 1059 | 1057 | 1060 | 1061 | 9 |
| 1059 | 1057 | 1060 | 1062 | 9 |
| 1059 | 1057 | 1060 | 1063 | 9 |
| 1057 | 1060 | 1063 | 1064 | 9 |
| 1057 | 1060 | 1063 | 1065 | 9 |
| 1057 | 1060 | 1063 | 1066 | 9 |
| 1061 | 1060 | 1063 | 1064 | 9 |
| 1061 | 1060 | 1063 | 1065 | 9 |
| 1061 | 1060 | 1063 | 1066 | 9 |
| 1062 | 1060 | 1063 | 1064 | 9 |
| 1062 | 1060 | 1063 | 1065 | 9 |
| 1062 | 1060 | 1063 | 1066 | 9 |
| 1060 | 1063 | 1066 | 1067 | 9 |
| 1060 | 1063 | 1066 | 1068 | 9 |
| 1060 | 1063 | 1066 | 1069 | 9 |
| 1064 | 1063 | 1066 | 1067 | 9 |
| 1064 | 1063 | 1066 | 1068 | 9 |
| 1064 | 1063 | 1066 | 1069 | 9 |
| 1065 | 1063 | 1066 | 1067 | 9 |
| 1065 | 1063 | 1066 | 1068 | 9 |
| 1065 | 1063 | 1066 | 1069 | 9 |
| 1063 | 1066 | 1069 | 1070 | 9 |
| 1063 | 1066 | 1069 | 1071 | 9 |
| 1063 | 1066 | 1069 | 1072 | 9 |
| 1067 | 1066 | 1069 | 1070 | 9 |
| 1067 | 1066 | 1069 | 1071 | 9 |
| 1067 | 1066 | 1069 | 1072 | 9 |
| 1068 | 1066 | 1069 | 1070 | 9 |
| 1068 | 1066 | 1069 | 1071 | 9 |
| 1068 | 1066 | 1069 | 1072 | 9 |
| 1046 | 1073 | 1075 | 1076 | 9 |
| 1046 | 1073 | 1075 | 1077 | 9 |
| 1074 | 1073 | 1075 | 1076 | 9 |
| 1074 | 1073 | 1075 | 1077 | 9 |

|      |      |      |      |   |
|------|------|------|------|---|
| 1101 | 1073 | 1075 | 1076 | 9 |
| 1101 | 1073 | 1075 | 1077 | 9 |
| 1046 | 1073 | 1101 | 1102 | 9 |
| 1046 | 1073 | 1101 | 1103 | 9 |
| 1046 | 1073 | 1101 | 1106 | 9 |
| 1074 | 1073 | 1101 | 1102 | 9 |
| 1074 | 1073 | 1101 | 1103 | 9 |
| 1074 | 1073 | 1101 | 1106 | 9 |
| 1075 | 1073 | 1101 | 1102 | 9 |
| 1075 | 1073 | 1101 | 1103 | 9 |
| 1075 | 1073 | 1101 | 1106 | 9 |
| 1073 | 1075 | 1077 | 1078 | 9 |
| 1073 | 1075 | 1077 | 1079 | 9 |
| 1076 | 1075 | 1077 | 1078 | 9 |
| 1076 | 1075 | 1077 | 1079 | 9 |
| 1075 | 1077 | 1079 | 1080 | 9 |
| 1075 | 1077 | 1079 | 1081 | 9 |
| 1075 | 1077 | 1079 | 1082 | 9 |
| 1078 | 1077 | 1079 | 1080 | 9 |
| 1078 | 1077 | 1079 | 1081 | 9 |
| 1078 | 1077 | 1079 | 1082 | 9 |
| 1077 | 1079 | 1082 | 1083 | 9 |
| 1077 | 1079 | 1082 | 1084 | 9 |
| 1077 | 1079 | 1082 | 1085 | 9 |
| 1080 | 1079 | 1082 | 1083 | 9 |
| 1080 | 1079 | 1082 | 1084 | 9 |
| 1080 | 1079 | 1082 | 1085 | 9 |
| 1081 | 1079 | 1082 | 1083 | 9 |
| 1081 | 1079 | 1082 | 1084 | 9 |
| 1081 | 1079 | 1082 | 1085 | 9 |
| 1079 | 1082 | 1085 | 1086 | 9 |
| 1079 | 1082 | 1085 | 1087 | 9 |
| 1079 | 1082 | 1085 | 1088 | 9 |
| 1083 | 1082 | 1085 | 1086 | 9 |
| 1083 | 1082 | 1085 | 1087 | 9 |
| 1083 | 1082 | 1085 | 1088 | 9 |
| 1084 | 1082 | 1085 | 1086 | 9 |
| 1084 | 1082 | 1085 | 1087 | 9 |
| 1084 | 1082 | 1085 | 1088 | 9 |
| 1082 | 1085 | 1088 | 1089 | 9 |
| 1082 | 1085 | 1088 | 1093 | 9 |
| 1082 | 1085 | 1088 | 1097 | 9 |
| 1086 | 1085 | 1088 | 1089 | 9 |
| 1086 | 1085 | 1088 | 1093 | 9 |
| 1086 | 1085 | 1088 | 1097 | 9 |
| 1087 | 1085 | 1088 | 1089 | 9 |
| 1087 | 1085 | 1088 | 1093 | 9 |
| 1087 | 1085 | 1088 | 1097 | 9 |
| 1085 | 1088 | 1089 | 1090 | 9 |
| 1085 | 1088 | 1089 | 1091 | 9 |
| 1085 | 1088 | 1089 | 1092 | 9 |
| 1093 | 1088 | 1089 | 1090 | 9 |
| 1093 | 1088 | 1089 | 1091 | 9 |
| 1093 | 1088 | 1089 | 1092 | 9 |

|      |      |      |      |   |
|------|------|------|------|---|
| 1097 | 1088 | 1089 | 1090 | 9 |
| 1097 | 1088 | 1089 | 1091 | 9 |
| 1097 | 1088 | 1089 | 1092 | 9 |
| 1085 | 1088 | 1093 | 1094 | 9 |
| 1085 | 1088 | 1093 | 1095 | 9 |
| 1085 | 1088 | 1093 | 1096 | 9 |
| 1089 | 1088 | 1093 | 1094 | 9 |
| 1089 | 1088 | 1093 | 1095 | 9 |
| 1089 | 1088 | 1093 | 1096 | 9 |
| 1097 | 1088 | 1093 | 1094 | 9 |
| 1097 | 1088 | 1093 | 1095 | 9 |
| 1097 | 1088 | 1093 | 1096 | 9 |
| 1085 | 1088 | 1097 | 1098 | 9 |
| 1085 | 1088 | 1097 | 1099 | 9 |
| 1085 | 1088 | 1097 | 1100 | 9 |
| 1089 | 1088 | 1097 | 1098 | 9 |
| 1089 | 1088 | 1097 | 1099 | 9 |
| 1089 | 1088 | 1097 | 1100 | 9 |
| 1093 | 1088 | 1097 | 1098 | 9 |
| 1093 | 1088 | 1097 | 1099 | 9 |
| 1093 | 1088 | 1097 | 1100 | 9 |
| 1073 | 1101 | 1103 | 1104 | 9 |
| 1073 | 1101 | 1103 | 1105 | 9 |
| 1102 | 1101 | 1103 | 1104 | 9 |
| 1102 | 1101 | 1103 | 1105 | 9 |
| 1106 | 1101 | 1103 | 1104 | 9 |
| 1106 | 1101 | 1103 | 1105 | 9 |
| 1073 | 1101 | 1106 | 1107 | 9 |
| 1073 | 1101 | 1106 | 1108 | 9 |
| 1073 | 1101 | 1106 | 1109 | 9 |
| 1102 | 1101 | 1106 | 1107 | 9 |
| 1102 | 1101 | 1106 | 1108 | 9 |
| 1102 | 1101 | 1106 | 1109 | 9 |
| 1103 | 1101 | 1106 | 1107 | 9 |
| 1103 | 1101 | 1106 | 1108 | 9 |
| 1103 | 1101 | 1106 | 1109 | 9 |
| 1101 | 1106 | 1109 | 1110 | 9 |
| 1101 | 1106 | 1109 | 1111 | 9 |
| 1101 | 1106 | 1109 | 1136 | 9 |
| 1107 | 1106 | 1109 | 1110 | 9 |
| 1107 | 1106 | 1109 | 1111 | 9 |
| 1107 | 1106 | 1109 | 1136 | 9 |
| 1108 | 1106 | 1109 | 1110 | 9 |
| 1108 | 1106 | 1109 | 1111 | 9 |
| 1108 | 1106 | 1109 | 1136 | 9 |
| 1106 | 1109 | 1111 | 1112 | 9 |
| 1106 | 1109 | 1111 | 1113 | 9 |
| 1106 | 1109 | 1111 | 1114 | 9 |
| 1110 | 1109 | 1111 | 1112 | 9 |
| 1110 | 1109 | 1111 | 1113 | 9 |
| 1110 | 1109 | 1111 | 1114 | 9 |
| 1136 | 1109 | 1111 | 1112 | 9 |
| 1136 | 1109 | 1111 | 1113 | 9 |
| 1136 | 1109 | 1111 | 1114 | 9 |

|      |      |      |      |   |
|------|------|------|------|---|
| 1106 | 1109 | 1136 | 1137 | 9 |
| 1106 | 1109 | 1136 | 1138 | 9 |
| 1106 | 1109 | 1136 | 1164 | 9 |
| 1110 | 1109 | 1136 | 1137 | 9 |
| 1110 | 1109 | 1136 | 1138 | 9 |
| 1110 | 1109 | 1136 | 1164 | 9 |
| 1111 | 1109 | 1136 | 1137 | 9 |
| 1111 | 1109 | 1136 | 1138 | 9 |
| 1111 | 1109 | 1136 | 1164 | 9 |
| 1109 | 1111 | 1114 | 1115 | 9 |
| 1109 | 1111 | 1114 | 1116 | 9 |
| 1109 | 1111 | 1114 | 1117 | 9 |
| 1112 | 1111 | 1114 | 1115 | 9 |
| 1112 | 1111 | 1114 | 1116 | 9 |
| 1112 | 1111 | 1114 | 1117 | 9 |
| 1113 | 1111 | 1114 | 1115 | 9 |
| 1113 | 1111 | 1114 | 1116 | 9 |
| 1113 | 1111 | 1114 | 1117 | 9 |
| 1111 | 1114 | 1117 | 1118 | 9 |
| 1111 | 1114 | 1117 | 1119 | 9 |
| 1111 | 1114 | 1117 | 1120 | 9 |
| 1115 | 1114 | 1117 | 1118 | 9 |
| 1115 | 1114 | 1117 | 1119 | 9 |
| 1115 | 1114 | 1117 | 1120 | 9 |
| 1116 | 1114 | 1117 | 1118 | 9 |
| 1116 | 1114 | 1117 | 1119 | 9 |
| 1116 | 1114 | 1117 | 1120 | 9 |
| 1114 | 1117 | 1120 | 1121 | 9 |
| 1114 | 1117 | 1120 | 1122 | 9 |
| 1114 | 1117 | 1120 | 1123 | 9 |
| 1118 | 1117 | 1120 | 1121 | 9 |
| 1118 | 1117 | 1120 | 1122 | 9 |
| 1118 | 1117 | 1120 | 1123 | 9 |
| 1119 | 1117 | 1120 | 1121 | 9 |
| 1119 | 1117 | 1120 | 1122 | 9 |
| 1119 | 1117 | 1120 | 1123 | 9 |
| 1117 | 1120 | 1123 | 1124 | 9 |
| 1117 | 1120 | 1123 | 1125 | 9 |
| 1117 | 1120 | 1123 | 1126 | 9 |
| 1121 | 1120 | 1123 | 1124 | 9 |
| 1121 | 1120 | 1123 | 1125 | 9 |
| 1121 | 1120 | 1123 | 1126 | 9 |
| 1122 | 1120 | 1123 | 1124 | 9 |
| 1122 | 1120 | 1123 | 1125 | 9 |
| 1122 | 1120 | 1123 | 1126 | 9 |
| 1120 | 1123 | 1126 | 1127 | 9 |
| 1120 | 1123 | 1126 | 1128 | 9 |
| 1120 | 1123 | 1126 | 1129 | 9 |
| 1124 | 1123 | 1126 | 1127 | 9 |
| 1124 | 1123 | 1126 | 1128 | 9 |
| 1124 | 1123 | 1126 | 1129 | 9 |
| 1125 | 1123 | 1126 | 1127 | 9 |
| 1125 | 1123 | 1126 | 1128 | 9 |
| 1125 | 1123 | 1126 | 1129 | 9 |

|      |      |      |      |   |
|------|------|------|------|---|
| 1123 | 1126 | 1129 | 1130 | 9 |
| 1123 | 1126 | 1129 | 1131 | 9 |
| 1123 | 1126 | 1129 | 1132 | 9 |
| 1127 | 1126 | 1129 | 1130 | 9 |
| 1127 | 1126 | 1129 | 1131 | 9 |
| 1127 | 1126 | 1129 | 1132 | 9 |
| 1128 | 1126 | 1129 | 1130 | 9 |
| 1128 | 1126 | 1129 | 1131 | 9 |
| 1128 | 1126 | 1129 | 1132 | 9 |
| 1126 | 1129 | 1132 | 1133 | 9 |
| 1126 | 1129 | 1132 | 1134 | 9 |
| 1126 | 1129 | 1132 | 1135 | 9 |
| 1130 | 1129 | 1132 | 1133 | 9 |
| 1130 | 1129 | 1132 | 1134 | 9 |
| 1130 | 1129 | 1132 | 1135 | 9 |
| 1131 | 1129 | 1132 | 1133 | 9 |
| 1131 | 1129 | 1132 | 1134 | 9 |
| 1131 | 1129 | 1132 | 1135 | 9 |
| 1109 | 1136 | 1138 | 1139 | 9 |
| 1109 | 1136 | 1138 | 1140 | 9 |
| 1137 | 1136 | 1138 | 1139 | 9 |
| 1137 | 1136 | 1138 | 1140 | 9 |
| 1164 | 1136 | 1138 | 1139 | 9 |
| 1164 | 1136 | 1138 | 1140 | 9 |
| 1109 | 1136 | 1164 | 1165 | 9 |
| 1109 | 1136 | 1164 | 1166 | 9 |
| 1109 | 1136 | 1164 | 1169 | 9 |
| 1137 | 1136 | 1164 | 1165 | 9 |
| 1137 | 1136 | 1164 | 1166 | 9 |
| 1137 | 1136 | 1164 | 1169 | 9 |
| 1138 | 1136 | 1164 | 1165 | 9 |
| 1138 | 1136 | 1164 | 1166 | 9 |
| 1138 | 1136 | 1164 | 1169 | 9 |
| 1136 | 1138 | 1140 | 1141 | 9 |
| 1136 | 1138 | 1140 | 1142 | 9 |
| 1139 | 1138 | 1140 | 1141 | 9 |
| 1139 | 1138 | 1140 | 1142 | 9 |
| 1138 | 1140 | 1142 | 1143 | 9 |
| 1138 | 1140 | 1142 | 1144 | 9 |
| 1138 | 1140 | 1142 | 1145 | 9 |
| 1141 | 1140 | 1142 | 1143 | 9 |
| 1141 | 1140 | 1142 | 1144 | 9 |
| 1141 | 1140 | 1142 | 1145 | 9 |
| 1140 | 1142 | 1145 | 1146 | 9 |
| 1140 | 1142 | 1145 | 1147 | 9 |
| 1140 | 1142 | 1145 | 1148 | 9 |
| 1143 | 1142 | 1145 | 1146 | 9 |
| 1143 | 1142 | 1145 | 1147 | 9 |
| 1143 | 1142 | 1145 | 1148 | 9 |
| 1144 | 1142 | 1145 | 1146 | 9 |
| 1144 | 1142 | 1145 | 1147 | 9 |
| 1144 | 1142 | 1145 | 1148 | 9 |
| 1142 | 1145 | 1148 | 1149 | 9 |
| 1142 | 1145 | 1148 | 1150 | 9 |

|      |      |      |      |   |
|------|------|------|------|---|
| 1142 | 1145 | 1148 | 1151 | 9 |
| 1146 | 1145 | 1148 | 1149 | 9 |
| 1146 | 1145 | 1148 | 1150 | 9 |
| 1146 | 1145 | 1148 | 1151 | 9 |
| 1147 | 1145 | 1148 | 1149 | 9 |
| 1147 | 1145 | 1148 | 1150 | 9 |
| 1147 | 1145 | 1148 | 1151 | 9 |
| 1145 | 1148 | 1151 | 1152 | 9 |
| 1145 | 1148 | 1151 | 1156 | 9 |
| 1145 | 1148 | 1151 | 1160 | 9 |
| 1149 | 1148 | 1151 | 1152 | 9 |
| 1149 | 1148 | 1151 | 1156 | 9 |
| 1149 | 1148 | 1151 | 1160 | 9 |
| 1150 | 1148 | 1151 | 1152 | 9 |
| 1150 | 1148 | 1151 | 1156 | 9 |
| 1150 | 1148 | 1151 | 1160 | 9 |
| 1148 | 1151 | 1152 | 1153 | 9 |
| 1148 | 1151 | 1152 | 1154 | 9 |
| 1148 | 1151 | 1152 | 1155 | 9 |
| 1156 | 1151 | 1152 | 1153 | 9 |
| 1156 | 1151 | 1152 | 1154 | 9 |
| 1156 | 1151 | 1152 | 1155 | 9 |
| 1160 | 1151 | 1152 | 1153 | 9 |
| 1160 | 1151 | 1152 | 1154 | 9 |
| 1160 | 1151 | 1152 | 1155 | 9 |
| 1148 | 1151 | 1156 | 1157 | 9 |
| 1148 | 1151 | 1156 | 1158 | 9 |
| 1148 | 1151 | 1156 | 1159 | 9 |
| 1152 | 1151 | 1156 | 1157 | 9 |
| 1152 | 1151 | 1156 | 1158 | 9 |
| 1152 | 1151 | 1156 | 1159 | 9 |
| 1160 | 1151 | 1156 | 1157 | 9 |
| 1160 | 1151 | 1156 | 1158 | 9 |
| 1160 | 1151 | 1156 | 1159 | 9 |
| 1148 | 1151 | 1160 | 1161 | 9 |
| 1148 | 1151 | 1160 | 1162 | 9 |
| 1148 | 1151 | 1160 | 1163 | 9 |
| 1152 | 1151 | 1160 | 1161 | 9 |
| 1152 | 1151 | 1160 | 1162 | 9 |
| 1152 | 1151 | 1160 | 1163 | 9 |
| 1156 | 1151 | 1160 | 1161 | 9 |
| 1156 | 1151 | 1160 | 1162 | 9 |
| 1156 | 1151 | 1160 | 1163 | 9 |
| 1136 | 1164 | 1166 | 1167 | 9 |
| 1136 | 1164 | 1166 | 1168 | 9 |
| 1165 | 1164 | 1166 | 1167 | 9 |
| 1165 | 1164 | 1166 | 1168 | 9 |
| 1169 | 1164 | 1166 | 1167 | 9 |
| 1169 | 1164 | 1166 | 1168 | 9 |
| 1136 | 1164 | 1169 | 1170 | 9 |
| 1136 | 1164 | 1169 | 1171 | 9 |
| 1136 | 1164 | 1169 | 1172 | 9 |
| 1165 | 1164 | 1169 | 1170 | 9 |
| 1165 | 1164 | 1169 | 1171 | 9 |

|      |      |      |      |   |
|------|------|------|------|---|
| 1165 | 1164 | 1169 | 1172 | 9 |
| 1166 | 1164 | 1169 | 1170 | 9 |
| 1166 | 1164 | 1169 | 1171 | 9 |
| 1166 | 1164 | 1169 | 1172 | 9 |
| 1164 | 1169 | 1172 | 1173 | 9 |
| 1164 | 1169 | 1172 | 1174 | 9 |
| 1164 | 1169 | 1172 | 1199 | 9 |
| 1170 | 1169 | 1172 | 1173 | 9 |
| 1170 | 1169 | 1172 | 1174 | 9 |
| 1170 | 1169 | 1172 | 1199 | 9 |
| 1171 | 1169 | 1172 | 1173 | 9 |
| 1171 | 1169 | 1172 | 1174 | 9 |
| 1171 | 1169 | 1172 | 1199 | 9 |
| 1169 | 1172 | 1174 | 1175 | 9 |
| 1169 | 1172 | 1174 | 1176 | 9 |
| 1169 | 1172 | 1174 | 1177 | 9 |
| 1173 | 1172 | 1174 | 1175 | 9 |
| 1173 | 1172 | 1174 | 1176 | 9 |
| 1173 | 1172 | 1174 | 1177 | 9 |
| 1199 | 1172 | 1174 | 1175 | 9 |
| 1199 | 1172 | 1174 | 1176 | 9 |
| 1199 | 1172 | 1174 | 1177 | 9 |
| 1169 | 1172 | 1199 | 1200 | 9 |
| 1169 | 1172 | 1199 | 1201 | 9 |
| 1169 | 1172 | 1199 | 1227 | 9 |
| 1173 | 1172 | 1199 | 1200 | 9 |
| 1173 | 1172 | 1199 | 1201 | 9 |
| 1173 | 1172 | 1199 | 1227 | 9 |
| 1174 | 1172 | 1199 | 1200 | 9 |
| 1174 | 1172 | 1199 | 1201 | 9 |
| 1174 | 1172 | 1199 | 1227 | 9 |
| 1172 | 1174 | 1177 | 1178 | 9 |
| 1172 | 1174 | 1177 | 1179 | 9 |
| 1172 | 1174 | 1177 | 1180 | 9 |
| 1175 | 1174 | 1177 | 1178 | 9 |
| 1175 | 1174 | 1177 | 1179 | 9 |
| 1175 | 1174 | 1177 | 1180 | 9 |
| 1176 | 1174 | 1177 | 1178 | 9 |
| 1176 | 1174 | 1177 | 1179 | 9 |
| 1176 | 1174 | 1177 | 1180 | 9 |
| 1174 | 1177 | 1180 | 1181 | 9 |
| 1174 | 1177 | 1180 | 1182 | 9 |
| 1174 | 1177 | 1180 | 1183 | 9 |
| 1178 | 1177 | 1180 | 1181 | 9 |
| 1178 | 1177 | 1180 | 1182 | 9 |
| 1178 | 1177 | 1180 | 1183 | 9 |
| 1179 | 1177 | 1180 | 1181 | 9 |
| 1179 | 1177 | 1180 | 1182 | 9 |
| 1179 | 1177 | 1180 | 1183 | 9 |
| 1177 | 1180 | 1183 | 1184 | 9 |
| 1177 | 1180 | 1183 | 1185 | 9 |
| 1177 | 1180 | 1183 | 1186 | 9 |
| 1181 | 1180 | 1183 | 1184 | 9 |
| 1181 | 1180 | 1183 | 1185 | 9 |

|      |      |      |      |   |
|------|------|------|------|---|
| 1181 | 1180 | 1183 | 1186 | 9 |
| 1182 | 1180 | 1183 | 1184 | 9 |
| 1182 | 1180 | 1183 | 1185 | 9 |
| 1182 | 1180 | 1183 | 1186 | 9 |
| 1180 | 1183 | 1186 | 1187 | 9 |
| 1180 | 1183 | 1186 | 1188 | 9 |
| 1180 | 1183 | 1186 | 1189 | 9 |
| 1184 | 1183 | 1186 | 1187 | 9 |
| 1184 | 1183 | 1186 | 1188 | 9 |
| 1184 | 1183 | 1186 | 1189 | 9 |
| 1185 | 1183 | 1186 | 1187 | 9 |
| 1185 | 1183 | 1186 | 1188 | 9 |
| 1185 | 1183 | 1186 | 1189 | 9 |
| 1183 | 1186 | 1189 | 1190 | 9 |
| 1183 | 1186 | 1189 | 1191 | 9 |
| 1183 | 1186 | 1189 | 1192 | 9 |
| 1187 | 1186 | 1189 | 1190 | 9 |
| 1187 | 1186 | 1189 | 1191 | 9 |
| 1187 | 1186 | 1189 | 1192 | 9 |
| 1188 | 1186 | 1189 | 1190 | 9 |
| 1188 | 1186 | 1189 | 1191 | 9 |
| 1188 | 1186 | 1189 | 1192 | 9 |
| 1186 | 1189 | 1192 | 1193 | 9 |
| 1186 | 1189 | 1192 | 1194 | 9 |
| 1186 | 1189 | 1192 | 1195 | 9 |
| 1190 | 1189 | 1192 | 1193 | 9 |
| 1190 | 1189 | 1192 | 1194 | 9 |
| 1190 | 1189 | 1192 | 1195 | 9 |
| 1191 | 1189 | 1192 | 1193 | 9 |
| 1191 | 1189 | 1192 | 1194 | 9 |
| 1191 | 1189 | 1192 | 1195 | 9 |
| 1189 | 1192 | 1195 | 1196 | 9 |
| 1189 | 1192 | 1195 | 1197 | 9 |
| 1189 | 1192 | 1195 | 1198 | 9 |
| 1193 | 1192 | 1195 | 1196 | 9 |
| 1193 | 1192 | 1195 | 1197 | 9 |
| 1193 | 1192 | 1195 | 1198 | 9 |
| 1194 | 1192 | 1195 | 1196 | 9 |
| 1194 | 1192 | 1195 | 1197 | 9 |
| 1194 | 1192 | 1195 | 1198 | 9 |
| 1172 | 1199 | 1201 | 1202 | 9 |
| 1172 | 1199 | 1201 | 1203 | 9 |
| 1200 | 1199 | 1201 | 1202 | 9 |
| 1200 | 1199 | 1201 | 1203 | 9 |
| 1227 | 1199 | 1201 | 1202 | 9 |
| 1227 | 1199 | 1201 | 1203 | 9 |
| 1172 | 1199 | 1227 | 1228 | 9 |
| 1172 | 1199 | 1227 | 1229 | 9 |
| 1172 | 1199 | 1227 | 1232 | 9 |
| 1200 | 1199 | 1227 | 1228 | 9 |
| 1200 | 1199 | 1227 | 1229 | 9 |
| 1200 | 1199 | 1227 | 1232 | 9 |
| 1201 | 1199 | 1227 | 1228 | 9 |
| 1201 | 1199 | 1227 | 1229 | 9 |



|      |      |      |      |   |
|------|------|------|------|---|
| 1201 | 1199 | 1227 | 1232 | 9 |
| 1199 | 1201 | 1203 | 1204 | 9 |
| 1199 | 1201 | 1203 | 1205 | 9 |
| 1202 | 1201 | 1203 | 1204 | 9 |
| 1202 | 1201 | 1203 | 1205 | 9 |
| 1201 | 1203 | 1205 | 1206 | 9 |
| 1201 | 1203 | 1205 | 1207 | 9 |
| 1201 | 1203 | 1205 | 1208 | 9 |
| 1204 | 1203 | 1205 | 1206 | 9 |
| 1204 | 1203 | 1205 | 1207 | 9 |
| 1204 | 1203 | 1205 | 1208 | 9 |
| 1203 | 1205 | 1208 | 1209 | 9 |
| 1203 | 1205 | 1208 | 1210 | 9 |
| 1203 | 1205 | 1208 | 1211 | 9 |
| 1206 | 1205 | 1208 | 1209 | 9 |
| 1206 | 1205 | 1208 | 1210 | 9 |
| 1206 | 1205 | 1208 | 1211 | 9 |
| 1207 | 1205 | 1208 | 1209 | 9 |
| 1207 | 1205 | 1208 | 1210 | 9 |
| 1207 | 1205 | 1208 | 1211 | 9 |
| 1205 | 1208 | 1211 | 1212 | 9 |
| 1205 | 1208 | 1211 | 1213 | 9 |
| 1205 | 1208 | 1211 | 1214 | 9 |
| 1209 | 1208 | 1211 | 1212 | 9 |
| 1209 | 1208 | 1211 | 1213 | 9 |
| 1209 | 1208 | 1211 | 1214 | 9 |
| 1210 | 1208 | 1211 | 1212 | 9 |
| 1210 | 1208 | 1211 | 1213 | 9 |
| 1210 | 1208 | 1211 | 1214 | 9 |
| 1208 | 1211 | 1214 | 1215 | 9 |
| 1208 | 1211 | 1214 | 1219 | 9 |
| 1208 | 1211 | 1214 | 1223 | 9 |
| 1212 | 1211 | 1214 | 1215 | 9 |
| 1212 | 1211 | 1214 | 1219 | 9 |
| 1212 | 1211 | 1214 | 1223 | 9 |
| 1213 | 1211 | 1214 | 1215 | 9 |
| 1213 | 1211 | 1214 | 1219 | 9 |
| 1213 | 1211 | 1214 | 1223 | 9 |
| 1211 | 1214 | 1215 | 1216 | 9 |
| 1211 | 1214 | 1215 | 1217 | 9 |
| 1211 | 1214 | 1215 | 1218 | 9 |
| 1219 | 1214 | 1215 | 1216 | 9 |
| 1219 | 1214 | 1215 | 1217 | 9 |
| 1219 | 1214 | 1215 | 1218 | 9 |
| 1223 | 1214 | 1215 | 1216 | 9 |
| 1223 | 1214 | 1215 | 1217 | 9 |
| 1223 | 1214 | 1215 | 1218 | 9 |
| 1211 | 1214 | 1219 | 1220 | 9 |
| 1211 | 1214 | 1219 | 1221 | 9 |
| 1211 | 1214 | 1219 | 1222 | 9 |
| 1215 | 1214 | 1219 | 1220 | 9 |
| 1215 | 1214 | 1219 | 1221 | 9 |
| 1215 | 1214 | 1219 | 1222 | 9 |
| 1223 | 1214 | 1219 | 1220 | 9 |

|      |      |      |      |   |
|------|------|------|------|---|
| 1223 | 1214 | 1219 | 1221 | 9 |
| 1223 | 1214 | 1219 | 1222 | 9 |
| 1211 | 1214 | 1223 | 1224 | 9 |
| 1211 | 1214 | 1223 | 1225 | 9 |
| 1211 | 1214 | 1223 | 1226 | 9 |
| 1215 | 1214 | 1223 | 1224 | 9 |
| 1215 | 1214 | 1223 | 1225 | 9 |
| 1215 | 1214 | 1223 | 1226 | 9 |
| 1219 | 1214 | 1223 | 1224 | 9 |
| 1219 | 1214 | 1223 | 1225 | 9 |
| 1219 | 1214 | 1223 | 1226 | 9 |
| 1199 | 1227 | 1229 | 1230 | 9 |
| 1199 | 1227 | 1229 | 1231 | 9 |
| 1228 | 1227 | 1229 | 1230 | 9 |
| 1228 | 1227 | 1229 | 1231 | 9 |
| 1232 | 1227 | 1229 | 1230 | 9 |
| 1232 | 1227 | 1229 | 1231 | 9 |
| 1199 | 1227 | 1232 | 1233 | 9 |
| 1199 | 1227 | 1232 | 1234 | 9 |
| 1199 | 1227 | 1232 | 1235 | 9 |
| 1228 | 1227 | 1232 | 1233 | 9 |
| 1228 | 1227 | 1232 | 1234 | 9 |
| 1228 | 1227 | 1232 | 1235 | 9 |
| 1229 | 1227 | 1232 | 1233 | 9 |
| 1229 | 1227 | 1232 | 1234 | 9 |
| 1229 | 1227 | 1232 | 1235 | 9 |
| 1227 | 1232 | 1235 | 1236 | 9 |
| 1227 | 1232 | 1235 | 1237 | 9 |
| 1227 | 1232 | 1235 | 1262 | 9 |
| 1233 | 1232 | 1235 | 1236 | 9 |
| 1233 | 1232 | 1235 | 1237 | 9 |
| 1233 | 1232 | 1235 | 1262 | 9 |
| 1234 | 1232 | 1235 | 1236 | 9 |
| 1234 | 1232 | 1235 | 1237 | 9 |
| 1234 | 1232 | 1235 | 1262 | 9 |
| 1232 | 1235 | 1237 | 1238 | 9 |
| 1232 | 1235 | 1237 | 1239 | 9 |
| 1232 | 1235 | 1237 | 1240 | 9 |
| 1236 | 1235 | 1237 | 1238 | 9 |
| 1236 | 1235 | 1237 | 1239 | 9 |
| 1236 | 1235 | 1237 | 1240 | 9 |
| 1262 | 1235 | 1237 | 1238 | 9 |
| 1262 | 1235 | 1237 | 1239 | 9 |
| 1262 | 1235 | 1237 | 1240 | 9 |
| 1232 | 1235 | 1262 | 1263 | 9 |
| 1232 | 1235 | 1262 | 1264 | 9 |
| 1232 | 1235 | 1262 | 1290 | 9 |
| 1236 | 1235 | 1262 | 1263 | 9 |
| 1236 | 1235 | 1262 | 1264 | 9 |
| 1236 | 1235 | 1262 | 1290 | 9 |
| 1237 | 1235 | 1262 | 1263 | 9 |
| 1237 | 1235 | 1262 | 1264 | 9 |
| 1237 | 1235 | 1262 | 1290 | 9 |
| 1235 | 1237 | 1240 | 1241 | 9 |

|      |      |      |      |   |
|------|------|------|------|---|
| 1235 | 1237 | 1240 | 1242 | 9 |
| 1235 | 1237 | 1240 | 1243 | 9 |
| 1238 | 1237 | 1240 | 1241 | 9 |
| 1238 | 1237 | 1240 | 1242 | 9 |
| 1238 | 1237 | 1240 | 1243 | 9 |
| 1239 | 1237 | 1240 | 1241 | 9 |
| 1239 | 1237 | 1240 | 1242 | 9 |
| 1239 | 1237 | 1240 | 1243 | 9 |
| 1237 | 1240 | 1243 | 1244 | 9 |
| 1237 | 1240 | 1243 | 1245 | 9 |
| 1237 | 1240 | 1243 | 1246 | 9 |
| 1241 | 1240 | 1243 | 1244 | 9 |
| 1241 | 1240 | 1243 | 1245 | 9 |
| 1241 | 1240 | 1243 | 1246 | 9 |
| 1242 | 1240 | 1243 | 1244 | 9 |
| 1242 | 1240 | 1243 | 1245 | 9 |
| 1242 | 1240 | 1243 | 1246 | 9 |
| 1240 | 1243 | 1246 | 1247 | 9 |
| 1240 | 1243 | 1246 | 1248 | 9 |
| 1240 | 1243 | 1246 | 1249 | 9 |
| 1244 | 1243 | 1246 | 1247 | 9 |
| 1244 | 1243 | 1246 | 1248 | 9 |
| 1244 | 1243 | 1246 | 1249 | 9 |
| 1245 | 1243 | 1246 | 1247 | 9 |
| 1245 | 1243 | 1246 | 1248 | 9 |
| 1245 | 1243 | 1246 | 1249 | 9 |
| 1243 | 1246 | 1249 | 1250 | 9 |
| 1243 | 1246 | 1249 | 1251 | 9 |
| 1243 | 1246 | 1249 | 1252 | 9 |
| 1247 | 1246 | 1249 | 1250 | 9 |
| 1247 | 1246 | 1249 | 1251 | 9 |
| 1247 | 1246 | 1249 | 1252 | 9 |
| 1248 | 1246 | 1249 | 1250 | 9 |
| 1248 | 1246 | 1249 | 1251 | 9 |
| 1248 | 1246 | 1249 | 1252 | 9 |
| 1246 | 1249 | 1252 | 1253 | 9 |
| 1246 | 1249 | 1252 | 1254 | 9 |
| 1246 | 1249 | 1252 | 1255 | 9 |
| 1250 | 1249 | 1252 | 1253 | 9 |
| 1250 | 1249 | 1252 | 1254 | 9 |
| 1250 | 1249 | 1252 | 1255 | 9 |
| 1251 | 1249 | 1252 | 1253 | 9 |
| 1251 | 1249 | 1252 | 1254 | 9 |
| 1251 | 1249 | 1252 | 1255 | 9 |
| 1249 | 1252 | 1255 | 1256 | 9 |
| 1249 | 1252 | 1255 | 1257 | 9 |
| 1249 | 1252 | 1255 | 1258 | 9 |
| 1253 | 1252 | 1255 | 1256 | 9 |
| 1253 | 1252 | 1255 | 1257 | 9 |
| 1253 | 1252 | 1255 | 1258 | 9 |
| 1254 | 1252 | 1255 | 1256 | 9 |
| 1254 | 1252 | 1255 | 1257 | 9 |
| 1254 | 1252 | 1255 | 1258 | 9 |
| 1252 | 1255 | 1258 | 1259 | 9 |

|      |      |      |      |   |
|------|------|------|------|---|
| 1252 | 1255 | 1258 | 1260 | 9 |
| 1252 | 1255 | 1258 | 1261 | 9 |
| 1256 | 1255 | 1258 | 1259 | 9 |
| 1256 | 1255 | 1258 | 1260 | 9 |
| 1256 | 1255 | 1258 | 1261 | 9 |
| 1257 | 1255 | 1258 | 1259 | 9 |
| 1257 | 1255 | 1258 | 1260 | 9 |
| 1257 | 1255 | 1258 | 1261 | 9 |
| 1235 | 1262 | 1264 | 1265 | 9 |
| 1235 | 1262 | 1264 | 1266 | 9 |
| 1263 | 1262 | 1264 | 1265 | 9 |
| 1263 | 1262 | 1264 | 1266 | 9 |
| 1290 | 1262 | 1264 | 1265 | 9 |
| 1290 | 1262 | 1264 | 1266 | 9 |
| 1235 | 1262 | 1290 | 1291 | 9 |
| 1235 | 1262 | 1290 | 1292 | 9 |
| 1235 | 1262 | 1290 | 1295 | 9 |
| 1263 | 1262 | 1290 | 1291 | 9 |
| 1263 | 1262 | 1290 | 1292 | 9 |
| 1263 | 1262 | 1290 | 1295 | 9 |
| 1264 | 1262 | 1290 | 1291 | 9 |
| 1264 | 1262 | 1290 | 1292 | 9 |
| 1264 | 1262 | 1290 | 1295 | 9 |
| 1262 | 1264 | 1266 | 1267 | 9 |
| 1262 | 1264 | 1266 | 1268 | 9 |
| 1265 | 1264 | 1266 | 1267 | 9 |
| 1265 | 1264 | 1266 | 1268 | 9 |
| 1264 | 1266 | 1268 | 1269 | 9 |
| 1264 | 1266 | 1268 | 1270 | 9 |
| 1264 | 1266 | 1268 | 1271 | 9 |
| 1267 | 1266 | 1268 | 1269 | 9 |
| 1267 | 1266 | 1268 | 1270 | 9 |
| 1267 | 1266 | 1268 | 1271 | 9 |
| 1266 | 1268 | 1271 | 1272 | 9 |
| 1266 | 1268 | 1271 | 1273 | 9 |
| 1266 | 1268 | 1271 | 1274 | 9 |
| 1269 | 1268 | 1271 | 1272 | 9 |
| 1269 | 1268 | 1271 | 1273 | 9 |
| 1269 | 1268 | 1271 | 1274 | 9 |
| 1270 | 1268 | 1271 | 1272 | 9 |
| 1270 | 1268 | 1271 | 1273 | 9 |
| 1270 | 1268 | 1271 | 1274 | 9 |
| 1268 | 1271 | 1274 | 1275 | 9 |
| 1268 | 1271 | 1274 | 1276 | 9 |
| 1268 | 1271 | 1274 | 1277 | 9 |
| 1272 | 1271 | 1274 | 1275 | 9 |
| 1272 | 1271 | 1274 | 1276 | 9 |
| 1272 | 1271 | 1274 | 1277 | 9 |
| 1273 | 1271 | 1274 | 1275 | 9 |
| 1273 | 1271 | 1274 | 1276 | 9 |
| 1273 | 1271 | 1274 | 1277 | 9 |
| 1271 | 1274 | 1277 | 1278 | 9 |
| 1271 | 1274 | 1277 | 1282 | 9 |
| 1271 | 1274 | 1277 | 1286 | 9 |

|      |      |      |      |   |
|------|------|------|------|---|
| 1275 | 1274 | 1277 | 1278 | 9 |
| 1275 | 1274 | 1277 | 1282 | 9 |
| 1275 | 1274 | 1277 | 1286 | 9 |
| 1276 | 1274 | 1277 | 1278 | 9 |
| 1276 | 1274 | 1277 | 1282 | 9 |
| 1276 | 1274 | 1277 | 1286 | 9 |
| 1274 | 1277 | 1278 | 1279 | 9 |
| 1274 | 1277 | 1278 | 1280 | 9 |
| 1274 | 1277 | 1278 | 1281 | 9 |
| 1282 | 1277 | 1278 | 1279 | 9 |
| 1282 | 1277 | 1278 | 1280 | 9 |
| 1282 | 1277 | 1278 | 1281 | 9 |
| 1286 | 1277 | 1278 | 1279 | 9 |
| 1286 | 1277 | 1278 | 1280 | 9 |
| 1286 | 1277 | 1278 | 1281 | 9 |
| 1274 | 1277 | 1282 | 1283 | 9 |
| 1274 | 1277 | 1282 | 1284 | 9 |
| 1274 | 1277 | 1282 | 1285 | 9 |
| 1278 | 1277 | 1282 | 1283 | 9 |
| 1278 | 1277 | 1282 | 1284 | 9 |
| 1278 | 1277 | 1282 | 1285 | 9 |
| 1286 | 1277 | 1282 | 1283 | 9 |
| 1286 | 1277 | 1282 | 1284 | 9 |
| 1286 | 1277 | 1282 | 1285 | 9 |
| 1274 | 1277 | 1286 | 1287 | 9 |
| 1274 | 1277 | 1286 | 1288 | 9 |
| 1274 | 1277 | 1286 | 1289 | 9 |
| 1278 | 1277 | 1286 | 1287 | 9 |
| 1278 | 1277 | 1286 | 1288 | 9 |
| 1278 | 1277 | 1286 | 1289 | 9 |
| 1282 | 1277 | 1286 | 1287 | 9 |
| 1282 | 1277 | 1286 | 1288 | 9 |
| 1282 | 1277 | 1286 | 1289 | 9 |
| 1262 | 1290 | 1292 | 1293 | 9 |
| 1262 | 1290 | 1292 | 1294 | 9 |
| 1291 | 1290 | 1292 | 1293 | 9 |
| 1291 | 1290 | 1292 | 1294 | 9 |
| 1295 | 1290 | 1292 | 1293 | 9 |
| 1295 | 1290 | 1292 | 1294 | 9 |
| 1262 | 1290 | 1295 | 1296 | 9 |
| 1262 | 1290 | 1295 | 1297 | 9 |
| 1262 | 1290 | 1295 | 1298 | 9 |
| 1291 | 1290 | 1295 | 1296 | 9 |
| 1291 | 1290 | 1295 | 1297 | 9 |
| 1291 | 1290 | 1295 | 1298 | 9 |
| 1292 | 1290 | 1295 | 1296 | 9 |
| 1292 | 1290 | 1295 | 1297 | 9 |
| 1292 | 1290 | 1295 | 1298 | 9 |
| 1290 | 1295 | 1298 | 1299 | 9 |
| 1290 | 1295 | 1298 | 1300 | 9 |
| 1290 | 1295 | 1298 | 1325 | 9 |
| 1296 | 1295 | 1298 | 1299 | 9 |
| 1296 | 1295 | 1298 | 1300 | 9 |
| 1296 | 1295 | 1298 | 1325 | 9 |

|      |      |      |      |   |
|------|------|------|------|---|
| 1297 | 1295 | 1298 | 1299 | 9 |
| 1297 | 1295 | 1298 | 1300 | 9 |
| 1297 | 1295 | 1298 | 1325 | 9 |
| 1295 | 1298 | 1300 | 1301 | 9 |
| 1295 | 1298 | 1300 | 1302 | 9 |
| 1295 | 1298 | 1300 | 1303 | 9 |
| 1299 | 1298 | 1300 | 1301 | 9 |
| 1299 | 1298 | 1300 | 1302 | 9 |
| 1299 | 1298 | 1300 | 1303 | 9 |
| 1325 | 1298 | 1300 | 1301 | 9 |
| 1325 | 1298 | 1300 | 1302 | 9 |
| 1325 | 1298 | 1300 | 1303 | 9 |
| 1295 | 1298 | 1325 | 1326 | 9 |
| 1295 | 1298 | 1325 | 1327 | 9 |
| 1295 | 1298 | 1325 | 1353 | 9 |
| 1299 | 1298 | 1325 | 1326 | 9 |
| 1299 | 1298 | 1325 | 1327 | 9 |
| 1299 | 1298 | 1325 | 1353 | 9 |
| 1300 | 1298 | 1325 | 1326 | 9 |
| 1300 | 1298 | 1325 | 1327 | 9 |
| 1300 | 1298 | 1325 | 1353 | 9 |
| 1298 | 1300 | 1303 | 1304 | 9 |
| 1298 | 1300 | 1303 | 1305 | 9 |
| 1298 | 1300 | 1303 | 1306 | 9 |
| 1301 | 1300 | 1303 | 1304 | 9 |
| 1301 | 1300 | 1303 | 1305 | 9 |
| 1301 | 1300 | 1303 | 1306 | 9 |
| 1302 | 1300 | 1303 | 1304 | 9 |
| 1302 | 1300 | 1303 | 1305 | 9 |
| 1302 | 1300 | 1303 | 1306 | 9 |
| 1300 | 1303 | 1306 | 1307 | 9 |
| 1300 | 1303 | 1306 | 1308 | 9 |
| 1300 | 1303 | 1306 | 1309 | 9 |
| 1304 | 1303 | 1306 | 1307 | 9 |
| 1304 | 1303 | 1306 | 1308 | 9 |
| 1304 | 1303 | 1306 | 1309 | 9 |
| 1305 | 1303 | 1306 | 1307 | 9 |
| 1305 | 1303 | 1306 | 1308 | 9 |
| 1305 | 1303 | 1306 | 1309 | 9 |
| 1303 | 1306 | 1309 | 1310 | 9 |
| 1303 | 1306 | 1309 | 1311 | 9 |
| 1303 | 1306 | 1309 | 1312 | 9 |
| 1307 | 1306 | 1309 | 1310 | 9 |
| 1307 | 1306 | 1309 | 1311 | 9 |
| 1307 | 1306 | 1309 | 1312 | 9 |
| 1308 | 1306 | 1309 | 1310 | 9 |
| 1308 | 1306 | 1309 | 1311 | 9 |
| 1308 | 1306 | 1309 | 1312 | 9 |
| 1306 | 1309 | 1312 | 1313 | 9 |
| 1306 | 1309 | 1312 | 1314 | 9 |
| 1306 | 1309 | 1312 | 1315 | 9 |
| 1310 | 1309 | 1312 | 1313 | 9 |
| 1310 | 1309 | 1312 | 1314 | 9 |
| 1310 | 1309 | 1312 | 1315 | 9 |

|      |      |      |      |   |
|------|------|------|------|---|
| 1311 | 1309 | 1312 | 1313 | 9 |
| 1311 | 1309 | 1312 | 1314 | 9 |
| 1311 | 1309 | 1312 | 1315 | 9 |
| 1309 | 1312 | 1315 | 1316 | 9 |
| 1309 | 1312 | 1315 | 1317 | 9 |
| 1309 | 1312 | 1315 | 1318 | 9 |
| 1313 | 1312 | 1315 | 1316 | 9 |
| 1313 | 1312 | 1315 | 1317 | 9 |
| 1313 | 1312 | 1315 | 1318 | 9 |
| 1314 | 1312 | 1315 | 1316 | 9 |
| 1314 | 1312 | 1315 | 1317 | 9 |
| 1314 | 1312 | 1315 | 1318 | 9 |
| 1312 | 1315 | 1318 | 1319 | 9 |
| 1312 | 1315 | 1318 | 1320 | 9 |
| 1312 | 1315 | 1318 | 1321 | 9 |
| 1316 | 1315 | 1318 | 1319 | 9 |
| 1316 | 1315 | 1318 | 1320 | 9 |
| 1316 | 1315 | 1318 | 1321 | 9 |
| 1317 | 1315 | 1318 | 1319 | 9 |
| 1317 | 1315 | 1318 | 1320 | 9 |
| 1317 | 1315 | 1318 | 1321 | 9 |
| 1315 | 1318 | 1321 | 1322 | 9 |
| 1315 | 1318 | 1321 | 1323 | 9 |
| 1315 | 1318 | 1321 | 1324 | 9 |
| 1319 | 1318 | 1321 | 1322 | 9 |
| 1319 | 1318 | 1321 | 1323 | 9 |
| 1319 | 1318 | 1321 | 1324 | 9 |
| 1320 | 1318 | 1321 | 1322 | 9 |
| 1320 | 1318 | 1321 | 1323 | 9 |
| 1320 | 1318 | 1321 | 1324 | 9 |
| 1298 | 1325 | 1327 | 1328 | 9 |
| 1298 | 1325 | 1327 | 1329 | 9 |
| 1326 | 1325 | 1327 | 1328 | 9 |
| 1326 | 1325 | 1327 | 1329 | 9 |
| 1353 | 1325 | 1327 | 1328 | 9 |
| 1353 | 1325 | 1327 | 1329 | 9 |
| 1298 | 1325 | 1353 | 1354 | 9 |
| 1298 | 1325 | 1353 | 1355 | 9 |
| 1298 | 1325 | 1353 | 1358 | 9 |
| 1326 | 1325 | 1353 | 1354 | 9 |
| 1326 | 1325 | 1353 | 1355 | 9 |
| 1326 | 1325 | 1353 | 1358 | 9 |
| 1327 | 1325 | 1353 | 1354 | 9 |
| 1327 | 1325 | 1353 | 1355 | 9 |
| 1327 | 1325 | 1353 | 1358 | 9 |
| 1325 | 1327 | 1329 | 1330 | 9 |
| 1325 | 1327 | 1329 | 1331 | 9 |
| 1328 | 1327 | 1329 | 1330 | 9 |
| 1328 | 1327 | 1329 | 1331 | 9 |
| 1327 | 1329 | 1331 | 1332 | 9 |
| 1327 | 1329 | 1331 | 1333 | 9 |
| 1327 | 1329 | 1331 | 1334 | 9 |
| 1330 | 1329 | 1331 | 1332 | 9 |
| 1330 | 1329 | 1331 | 1333 | 9 |

|      |      |      |      |   |
|------|------|------|------|---|
| 1330 | 1329 | 1331 | 1334 | 9 |
| 1329 | 1331 | 1334 | 1335 | 9 |
| 1329 | 1331 | 1334 | 1336 | 9 |
| 1329 | 1331 | 1334 | 1337 | 9 |
| 1332 | 1331 | 1334 | 1335 | 9 |
| 1332 | 1331 | 1334 | 1336 | 9 |
| 1332 | 1331 | 1334 | 1337 | 9 |
| 1333 | 1331 | 1334 | 1335 | 9 |
| 1333 | 1331 | 1334 | 1336 | 9 |
| 1333 | 1331 | 1334 | 1337 | 9 |
| 1331 | 1334 | 1337 | 1338 | 9 |
| 1331 | 1334 | 1337 | 1339 | 9 |
| 1331 | 1334 | 1337 | 1340 | 9 |
| 1335 | 1334 | 1337 | 1338 | 9 |
| 1335 | 1334 | 1337 | 1339 | 9 |
| 1335 | 1334 | 1337 | 1340 | 9 |
| 1336 | 1334 | 1337 | 1338 | 9 |
| 1336 | 1334 | 1337 | 1339 | 9 |
| 1336 | 1334 | 1337 | 1340 | 9 |
| 1334 | 1337 | 1340 | 1341 | 9 |
| 1334 | 1337 | 1340 | 1345 | 9 |
| 1334 | 1337 | 1340 | 1349 | 9 |
| 1338 | 1337 | 1340 | 1341 | 9 |
| 1338 | 1337 | 1340 | 1345 | 9 |
| 1338 | 1337 | 1340 | 1349 | 9 |
| 1339 | 1337 | 1340 | 1341 | 9 |
| 1339 | 1337 | 1340 | 1345 | 9 |
| 1339 | 1337 | 1340 | 1349 | 9 |
| 1337 | 1340 | 1341 | 1342 | 9 |
| 1337 | 1340 | 1341 | 1343 | 9 |
| 1337 | 1340 | 1341 | 1344 | 9 |
| 1345 | 1340 | 1341 | 1342 | 9 |
| 1345 | 1340 | 1341 | 1343 | 9 |
| 1345 | 1340 | 1341 | 1344 | 9 |
| 1349 | 1340 | 1341 | 1342 | 9 |
| 1349 | 1340 | 1341 | 1343 | 9 |
| 1349 | 1340 | 1341 | 1344 | 9 |
| 1337 | 1340 | 1345 | 1346 | 9 |
| 1337 | 1340 | 1345 | 1347 | 9 |
| 1337 | 1340 | 1345 | 1348 | 9 |
| 1341 | 1340 | 1345 | 1346 | 9 |
| 1341 | 1340 | 1345 | 1347 | 9 |
| 1341 | 1340 | 1345 | 1348 | 9 |
| 1349 | 1340 | 1345 | 1346 | 9 |
| 1349 | 1340 | 1345 | 1347 | 9 |
| 1349 | 1340 | 1345 | 1348 | 9 |
| 1337 | 1340 | 1349 | 1350 | 9 |
| 1337 | 1340 | 1349 | 1351 | 9 |
| 1337 | 1340 | 1349 | 1352 | 9 |
| 1341 | 1340 | 1349 | 1350 | 9 |
| 1341 | 1340 | 1349 | 1351 | 9 |
| 1341 | 1340 | 1349 | 1352 | 9 |
| 1345 | 1340 | 1349 | 1350 | 9 |
| 1345 | 1340 | 1349 | 1351 | 9 |



|      |      |      |      |   |
|------|------|------|------|---|
| 1345 | 1340 | 1349 | 1352 | 9 |
| 1325 | 1353 | 1355 | 1356 | 9 |
| 1325 | 1353 | 1355 | 1357 | 9 |
| 1354 | 1353 | 1355 | 1356 | 9 |
| 1354 | 1353 | 1355 | 1357 | 9 |
| 1358 | 1353 | 1355 | 1356 | 9 |
| 1358 | 1353 | 1355 | 1357 | 9 |
| 1325 | 1353 | 1358 | 1359 | 9 |
| 1325 | 1353 | 1358 | 1360 | 9 |
| 1325 | 1353 | 1358 | 1361 | 9 |
| 1354 | 1353 | 1358 | 1359 | 9 |
| 1354 | 1353 | 1358 | 1360 | 9 |
| 1354 | 1353 | 1358 | 1361 | 9 |
| 1355 | 1353 | 1358 | 1359 | 9 |
| 1355 | 1353 | 1358 | 1360 | 9 |
| 1355 | 1353 | 1358 | 1361 | 9 |
| 1353 | 1358 | 1361 | 1362 | 9 |
| 1353 | 1358 | 1361 | 1363 | 9 |
| 1353 | 1358 | 1361 | 1388 | 9 |
| 1359 | 1358 | 1361 | 1362 | 9 |
| 1359 | 1358 | 1361 | 1363 | 9 |
| 1359 | 1358 | 1361 | 1388 | 9 |
| 1360 | 1358 | 1361 | 1362 | 9 |
| 1360 | 1358 | 1361 | 1363 | 9 |
| 1360 | 1358 | 1361 | 1388 | 9 |
| 1358 | 1361 | 1363 | 1364 | 9 |
| 1358 | 1361 | 1363 | 1365 | 9 |
| 1358 | 1361 | 1363 | 1366 | 9 |
| 1362 | 1361 | 1363 | 1364 | 9 |
| 1362 | 1361 | 1363 | 1365 | 9 |
| 1362 | 1361 | 1363 | 1366 | 9 |
| 1388 | 1361 | 1363 | 1364 | 9 |
| 1388 | 1361 | 1363 | 1365 | 9 |
| 1388 | 1361 | 1363 | 1366 | 9 |
| 1358 | 1361 | 1388 | 1389 | 9 |
| 1358 | 1361 | 1388 | 1390 | 9 |
| 1358 | 1361 | 1388 | 1416 | 9 |
| 1362 | 1361 | 1388 | 1389 | 9 |
| 1362 | 1361 | 1388 | 1390 | 9 |
| 1362 | 1361 | 1388 | 1416 | 9 |
| 1363 | 1361 | 1388 | 1389 | 9 |
| 1363 | 1361 | 1388 | 1390 | 9 |
| 1363 | 1361 | 1388 | 1416 | 9 |
| 1361 | 1363 | 1366 | 1367 | 9 |
| 1361 | 1363 | 1366 | 1368 | 9 |
| 1361 | 1363 | 1366 | 1369 | 9 |
| 1364 | 1363 | 1366 | 1367 | 9 |
| 1364 | 1363 | 1366 | 1368 | 9 |
| 1364 | 1363 | 1366 | 1369 | 9 |
| 1365 | 1363 | 1366 | 1367 | 9 |
| 1365 | 1363 | 1366 | 1368 | 9 |
| 1365 | 1363 | 1366 | 1369 | 9 |
| 1363 | 1366 | 1369 | 1370 | 9 |
| 1363 | 1366 | 1369 | 1371 | 9 |

|      |      |      |      |   |
|------|------|------|------|---|
| 1363 | 1366 | 1369 | 1372 | 9 |
| 1367 | 1366 | 1369 | 1370 | 9 |
| 1367 | 1366 | 1369 | 1371 | 9 |
| 1367 | 1366 | 1369 | 1372 | 9 |
| 1368 | 1366 | 1369 | 1370 | 9 |
| 1368 | 1366 | 1369 | 1371 | 9 |
| 1368 | 1366 | 1369 | 1372 | 9 |
| 1366 | 1369 | 1372 | 1373 | 9 |
| 1366 | 1369 | 1372 | 1374 | 9 |
| 1366 | 1369 | 1372 | 1375 | 9 |
| 1370 | 1369 | 1372 | 1373 | 9 |
| 1370 | 1369 | 1372 | 1374 | 9 |
| 1370 | 1369 | 1372 | 1375 | 9 |
| 1371 | 1369 | 1372 | 1373 | 9 |
| 1371 | 1369 | 1372 | 1374 | 9 |
| 1371 | 1369 | 1372 | 1375 | 9 |
| 1369 | 1372 | 1375 | 1376 | 9 |
| 1369 | 1372 | 1375 | 1377 | 9 |
| 1369 | 1372 | 1375 | 1378 | 9 |
| 1373 | 1372 | 1375 | 1376 | 9 |
| 1373 | 1372 | 1375 | 1377 | 9 |
| 1373 | 1372 | 1375 | 1378 | 9 |
| 1374 | 1372 | 1375 | 1376 | 9 |
| 1374 | 1372 | 1375 | 1377 | 9 |
| 1374 | 1372 | 1375 | 1378 | 9 |
| 1372 | 1375 | 1378 | 1379 | 9 |
| 1372 | 1375 | 1378 | 1380 | 9 |
| 1372 | 1375 | 1378 | 1381 | 9 |
| 1376 | 1375 | 1378 | 1379 | 9 |
| 1376 | 1375 | 1378 | 1380 | 9 |
| 1376 | 1375 | 1378 | 1381 | 9 |
| 1377 | 1375 | 1378 | 1379 | 9 |
| 1377 | 1375 | 1378 | 1380 | 9 |
| 1377 | 1375 | 1378 | 1381 | 9 |
| 1375 | 1378 | 1381 | 1382 | 9 |
| 1375 | 1378 | 1381 | 1383 | 9 |
| 1375 | 1378 | 1381 | 1384 | 9 |
| 1379 | 1378 | 1381 | 1382 | 9 |
| 1379 | 1378 | 1381 | 1383 | 9 |
| 1379 | 1378 | 1381 | 1384 | 9 |
| 1380 | 1378 | 1381 | 1382 | 9 |
| 1380 | 1378 | 1381 | 1383 | 9 |
| 1380 | 1378 | 1381 | 1384 | 9 |
| 1378 | 1381 | 1384 | 1385 | 9 |
| 1378 | 1381 | 1384 | 1386 | 9 |
| 1378 | 1381 | 1384 | 1387 | 9 |
| 1382 | 1381 | 1384 | 1385 | 9 |
| 1382 | 1381 | 1384 | 1386 | 9 |
| 1382 | 1381 | 1384 | 1387 | 9 |
| 1383 | 1381 | 1384 | 1385 | 9 |
| 1383 | 1381 | 1384 | 1386 | 9 |
| 1383 | 1381 | 1384 | 1387 | 9 |
| 1361 | 1388 | 1390 | 1391 | 9 |
| 1361 | 1388 | 1390 | 1392 | 9 |

|      |      |      |      |   |
|------|------|------|------|---|
| 1389 | 1388 | 1390 | 1391 | 9 |
| 1389 | 1388 | 1390 | 1392 | 9 |
| 1416 | 1388 | 1390 | 1391 | 9 |
| 1416 | 1388 | 1390 | 1392 | 9 |
| 1361 | 1388 | 1416 | 1417 | 9 |
| 1361 | 1388 | 1416 | 1418 | 9 |
| 1361 | 1388 | 1416 | 1421 | 9 |
| 1389 | 1388 | 1416 | 1417 | 9 |
| 1389 | 1388 | 1416 | 1418 | 9 |
| 1389 | 1388 | 1416 | 1421 | 9 |
| 1390 | 1388 | 1416 | 1417 | 9 |
| 1390 | 1388 | 1416 | 1418 | 9 |
| 1390 | 1388 | 1416 | 1421 | 9 |
| 1388 | 1390 | 1392 | 1393 | 9 |
| 1388 | 1390 | 1392 | 1394 | 9 |
| 1391 | 1390 | 1392 | 1393 | 9 |
| 1391 | 1390 | 1392 | 1394 | 9 |
| 1390 | 1392 | 1394 | 1395 | 9 |
| 1390 | 1392 | 1394 | 1396 | 9 |
| 1390 | 1392 | 1394 | 1397 | 9 |
| 1393 | 1392 | 1394 | 1395 | 9 |
| 1393 | 1392 | 1394 | 1396 | 9 |
| 1393 | 1392 | 1394 | 1397 | 9 |
| 1392 | 1394 | 1397 | 1398 | 9 |
| 1392 | 1394 | 1397 | 1399 | 9 |
| 1392 | 1394 | 1397 | 1400 | 9 |
| 1395 | 1394 | 1397 | 1398 | 9 |
| 1395 | 1394 | 1397 | 1399 | 9 |
| 1395 | 1394 | 1397 | 1400 | 9 |
| 1396 | 1394 | 1397 | 1398 | 9 |
| 1396 | 1394 | 1397 | 1399 | 9 |
| 1396 | 1394 | 1397 | 1400 | 9 |
| 1394 | 1397 | 1400 | 1401 | 9 |
| 1394 | 1397 | 1400 | 1402 | 9 |
| 1394 | 1397 | 1400 | 1403 | 9 |
| 1398 | 1397 | 1400 | 1401 | 9 |
| 1398 | 1397 | 1400 | 1402 | 9 |
| 1398 | 1397 | 1400 | 1403 | 9 |
| 1399 | 1397 | 1400 | 1401 | 9 |
| 1399 | 1397 | 1400 | 1402 | 9 |
| 1399 | 1397 | 1400 | 1403 | 9 |
| 1397 | 1400 | 1403 | 1404 | 9 |
| 1397 | 1400 | 1403 | 1408 | 9 |
| 1397 | 1400 | 1403 | 1412 | 9 |
| 1401 | 1400 | 1403 | 1404 | 9 |
| 1401 | 1400 | 1403 | 1408 | 9 |
| 1401 | 1400 | 1403 | 1412 | 9 |
| 1402 | 1400 | 1403 | 1404 | 9 |
| 1402 | 1400 | 1403 | 1408 | 9 |
| 1402 | 1400 | 1403 | 1412 | 9 |
| 1400 | 1403 | 1404 | 1405 | 9 |
| 1400 | 1403 | 1404 | 1406 | 9 |
| 1400 | 1403 | 1404 | 1407 | 9 |
| 1408 | 1403 | 1404 | 1405 | 9 |

|      |      |      |      |   |
|------|------|------|------|---|
| 1408 | 1403 | 1404 | 1406 | 9 |
| 1408 | 1403 | 1404 | 1407 | 9 |
| 1412 | 1403 | 1404 | 1405 | 9 |
| 1412 | 1403 | 1404 | 1406 | 9 |
| 1412 | 1403 | 1404 | 1407 | 9 |
| 1400 | 1403 | 1408 | 1409 | 9 |
| 1400 | 1403 | 1408 | 1410 | 9 |
| 1400 | 1403 | 1408 | 1411 | 9 |
| 1404 | 1403 | 1408 | 1409 | 9 |
| 1404 | 1403 | 1408 | 1410 | 9 |
| 1404 | 1403 | 1408 | 1411 | 9 |
| 1412 | 1403 | 1408 | 1409 | 9 |
| 1412 | 1403 | 1408 | 1410 | 9 |
| 1412 | 1403 | 1408 | 1411 | 9 |
| 1400 | 1403 | 1412 | 1413 | 9 |
| 1400 | 1403 | 1412 | 1414 | 9 |
| 1400 | 1403 | 1412 | 1415 | 9 |
| 1404 | 1403 | 1412 | 1413 | 9 |
| 1404 | 1403 | 1412 | 1414 | 9 |
| 1404 | 1403 | 1412 | 1415 | 9 |
| 1408 | 1403 | 1412 | 1413 | 9 |
| 1408 | 1403 | 1412 | 1414 | 9 |
| 1408 | 1403 | 1412 | 1415 | 9 |
| 1388 | 1416 | 1418 | 1419 | 9 |
| 1388 | 1416 | 1418 | 1420 | 9 |
| 1417 | 1416 | 1418 | 1419 | 9 |
| 1417 | 1416 | 1418 | 1420 | 9 |
| 1421 | 1416 | 1418 | 1419 | 9 |
| 1421 | 1416 | 1418 | 1420 | 9 |
| 1388 | 1416 | 1421 | 1422 | 9 |
| 1388 | 1416 | 1421 | 1423 | 9 |
| 1388 | 1416 | 1421 | 1424 | 9 |
| 1417 | 1416 | 1421 | 1422 | 9 |
| 1417 | 1416 | 1421 | 1423 | 9 |
| 1417 | 1416 | 1421 | 1424 | 9 |
| 1418 | 1416 | 1421 | 1422 | 9 |
| 1418 | 1416 | 1421 | 1423 | 9 |
| 1418 | 1416 | 1421 | 1424 | 9 |
| 1416 | 1421 | 1424 | 1425 | 9 |
| 1416 | 1421 | 1424 | 1426 | 9 |
| 1416 | 1421 | 1424 | 1451 | 9 |
| 1422 | 1421 | 1424 | 1425 | 9 |
| 1422 | 1421 | 1424 | 1426 | 9 |
| 1422 | 1421 | 1424 | 1451 | 9 |
| 1423 | 1421 | 1424 | 1425 | 9 |
| 1423 | 1421 | 1424 | 1426 | 9 |
| 1423 | 1421 | 1424 | 1451 | 9 |
| 1421 | 1424 | 1426 | 1427 | 9 |
| 1421 | 1424 | 1426 | 1428 | 9 |
| 1421 | 1424 | 1426 | 1429 | 9 |
| 1425 | 1424 | 1426 | 1427 | 9 |
| 1425 | 1424 | 1426 | 1428 | 9 |
| 1425 | 1424 | 1426 | 1429 | 9 |
| 1451 | 1424 | 1426 | 1427 | 9 |

|      |      |      |      |   |
|------|------|------|------|---|
| 1451 | 1424 | 1426 | 1428 | 9 |
| 1451 | 1424 | 1426 | 1429 | 9 |
| 1421 | 1424 | 1451 | 1452 | 9 |
| 1421 | 1424 | 1451 | 1453 | 9 |
| 1421 | 1424 | 1451 | 1479 | 9 |
| 1425 | 1424 | 1451 | 1452 | 9 |
| 1425 | 1424 | 1451 | 1453 | 9 |
| 1425 | 1424 | 1451 | 1479 | 9 |
| 1426 | 1424 | 1451 | 1452 | 9 |
| 1426 | 1424 | 1451 | 1453 | 9 |
| 1426 | 1424 | 1451 | 1479 | 9 |
| 1424 | 1426 | 1429 | 1430 | 9 |
| 1424 | 1426 | 1429 | 1431 | 9 |
| 1424 | 1426 | 1429 | 1432 | 9 |
| 1427 | 1426 | 1429 | 1430 | 9 |
| 1427 | 1426 | 1429 | 1431 | 9 |
| 1427 | 1426 | 1429 | 1432 | 9 |
| 1428 | 1426 | 1429 | 1430 | 9 |
| 1428 | 1426 | 1429 | 1431 | 9 |
| 1428 | 1426 | 1429 | 1432 | 9 |
| 1426 | 1429 | 1432 | 1433 | 9 |
| 1426 | 1429 | 1432 | 1434 | 9 |
| 1426 | 1429 | 1432 | 1435 | 9 |
| 1430 | 1429 | 1432 | 1433 | 9 |
| 1430 | 1429 | 1432 | 1434 | 9 |
| 1430 | 1429 | 1432 | 1435 | 9 |
| 1431 | 1429 | 1432 | 1433 | 9 |
| 1431 | 1429 | 1432 | 1434 | 9 |
| 1431 | 1429 | 1432 | 1435 | 9 |
| 1429 | 1432 | 1435 | 1436 | 9 |
| 1429 | 1432 | 1435 | 1437 | 9 |
| 1429 | 1432 | 1435 | 1438 | 9 |
| 1433 | 1432 | 1435 | 1436 | 9 |
| 1433 | 1432 | 1435 | 1437 | 9 |
| 1433 | 1432 | 1435 | 1438 | 9 |
| 1434 | 1432 | 1435 | 1436 | 9 |
| 1434 | 1432 | 1435 | 1437 | 9 |
| 1434 | 1432 | 1435 | 1438 | 9 |
| 1432 | 1435 | 1438 | 1439 | 9 |
| 1432 | 1435 | 1438 | 1440 | 9 |
| 1432 | 1435 | 1438 | 1441 | 9 |
| 1436 | 1435 | 1438 | 1439 | 9 |
| 1436 | 1435 | 1438 | 1440 | 9 |
| 1436 | 1435 | 1438 | 1441 | 9 |
| 1437 | 1435 | 1438 | 1439 | 9 |
| 1437 | 1435 | 1438 | 1440 | 9 |
| 1437 | 1435 | 1438 | 1441 | 9 |
| 1435 | 1438 | 1441 | 1442 | 9 |
| 1435 | 1438 | 1441 | 1443 | 9 |
| 1435 | 1438 | 1441 | 1444 | 9 |
| 1439 | 1438 | 1441 | 1442 | 9 |
| 1439 | 1438 | 1441 | 1443 | 9 |
| 1439 | 1438 | 1441 | 1444 | 9 |
| 1440 | 1438 | 1441 | 1442 | 9 |

|      |      |      |      |   |
|------|------|------|------|---|
| 1440 | 1438 | 1441 | 1443 | 9 |
| 1440 | 1438 | 1441 | 1444 | 9 |
| 1438 | 1441 | 1444 | 1445 | 9 |
| 1438 | 1441 | 1444 | 1446 | 9 |
| 1438 | 1441 | 1444 | 1447 | 9 |
| 1442 | 1441 | 1444 | 1445 | 9 |
| 1442 | 1441 | 1444 | 1446 | 9 |
| 1442 | 1441 | 1444 | 1447 | 9 |
| 1443 | 1441 | 1444 | 1445 | 9 |
| 1443 | 1441 | 1444 | 1446 | 9 |
| 1443 | 1441 | 1444 | 1447 | 9 |
| 1441 | 1444 | 1447 | 1448 | 9 |
| 1441 | 1444 | 1447 | 1449 | 9 |
| 1441 | 1444 | 1447 | 1450 | 9 |
| 1445 | 1444 | 1447 | 1448 | 9 |
| 1445 | 1444 | 1447 | 1449 | 9 |
| 1445 | 1444 | 1447 | 1450 | 9 |
| 1446 | 1444 | 1447 | 1448 | 9 |
| 1446 | 1444 | 1447 | 1449 | 9 |
| 1446 | 1444 | 1447 | 1450 | 9 |
| 1424 | 1451 | 1453 | 1454 | 9 |
| 1424 | 1451 | 1453 | 1455 | 9 |
| 1452 | 1451 | 1453 | 1454 | 9 |
| 1452 | 1451 | 1453 | 1455 | 9 |
| 1479 | 1451 | 1453 | 1454 | 9 |
| 1479 | 1451 | 1453 | 1455 | 9 |
| 1424 | 1451 | 1479 | 1480 | 9 |
| 1424 | 1451 | 1479 | 1481 | 9 |
| 1424 | 1451 | 1479 | 1484 | 9 |
| 1452 | 1451 | 1479 | 1480 | 9 |
| 1452 | 1451 | 1479 | 1481 | 9 |
| 1452 | 1451 | 1479 | 1484 | 9 |
| 1453 | 1451 | 1479 | 1480 | 9 |
| 1453 | 1451 | 1479 | 1481 | 9 |
| 1453 | 1451 | 1479 | 1484 | 9 |
| 1451 | 1453 | 1455 | 1456 | 9 |
| 1451 | 1453 | 1455 | 1457 | 9 |
| 1454 | 1453 | 1455 | 1456 | 9 |
| 1454 | 1453 | 1455 | 1457 | 9 |
| 1453 | 1455 | 1457 | 1458 | 9 |
| 1453 | 1455 | 1457 | 1459 | 9 |
| 1453 | 1455 | 1457 | 1460 | 9 |
| 1456 | 1455 | 1457 | 1458 | 9 |
| 1456 | 1455 | 1457 | 1459 | 9 |
| 1456 | 1455 | 1457 | 1460 | 9 |
| 1455 | 1457 | 1460 | 1461 | 9 |
| 1455 | 1457 | 1460 | 1462 | 9 |
| 1455 | 1457 | 1460 | 1463 | 9 |
| 1458 | 1457 | 1460 | 1461 | 9 |
| 1458 | 1457 | 1460 | 1462 | 9 |
| 1458 | 1457 | 1460 | 1463 | 9 |
| 1459 | 1457 | 1460 | 1461 | 9 |
| 1459 | 1457 | 1460 | 1462 | 9 |
| 1459 | 1457 | 1460 | 1463 | 9 |

|      |      |      |      |   |
|------|------|------|------|---|
| 1457 | 1460 | 1463 | 1464 | 9 |
| 1457 | 1460 | 1463 | 1465 | 9 |
| 1457 | 1460 | 1463 | 1466 | 9 |
| 1461 | 1460 | 1463 | 1464 | 9 |
| 1461 | 1460 | 1463 | 1465 | 9 |
| 1461 | 1460 | 1463 | 1466 | 9 |
| 1462 | 1460 | 1463 | 1464 | 9 |
| 1462 | 1460 | 1463 | 1465 | 9 |
| 1462 | 1460 | 1463 | 1466 | 9 |
| 1460 | 1463 | 1466 | 1467 | 9 |
| 1460 | 1463 | 1466 | 1471 | 9 |
| 1460 | 1463 | 1466 | 1475 | 9 |
| 1464 | 1463 | 1466 | 1467 | 9 |
| 1464 | 1463 | 1466 | 1471 | 9 |
| 1464 | 1463 | 1466 | 1475 | 9 |
| 1465 | 1463 | 1466 | 1467 | 9 |
| 1465 | 1463 | 1466 | 1471 | 9 |
| 1465 | 1463 | 1466 | 1475 | 9 |
| 1463 | 1466 | 1467 | 1468 | 9 |
| 1463 | 1466 | 1467 | 1469 | 9 |
| 1463 | 1466 | 1467 | 1470 | 9 |
| 1471 | 1466 | 1467 | 1468 | 9 |
| 1471 | 1466 | 1467 | 1469 | 9 |
| 1471 | 1466 | 1467 | 1470 | 9 |
| 1475 | 1466 | 1467 | 1468 | 9 |
| 1475 | 1466 | 1467 | 1469 | 9 |
| 1475 | 1466 | 1467 | 1470 | 9 |
| 1463 | 1466 | 1471 | 1472 | 9 |
| 1463 | 1466 | 1471 | 1473 | 9 |
| 1463 | 1466 | 1471 | 1474 | 9 |
| 1467 | 1466 | 1471 | 1472 | 9 |
| 1467 | 1466 | 1471 | 1473 | 9 |
| 1467 | 1466 | 1471 | 1474 | 9 |
| 1475 | 1466 | 1471 | 1472 | 9 |
| 1475 | 1466 | 1471 | 1473 | 9 |
| 1475 | 1466 | 1471 | 1474 | 9 |
| 1463 | 1466 | 1475 | 1476 | 9 |
| 1463 | 1466 | 1475 | 1477 | 9 |
| 1463 | 1466 | 1475 | 1478 | 9 |
| 1467 | 1466 | 1475 | 1476 | 9 |
| 1467 | 1466 | 1475 | 1477 | 9 |
| 1467 | 1466 | 1475 | 1478 | 9 |
| 1471 | 1466 | 1475 | 1476 | 9 |
| 1471 | 1466 | 1475 | 1477 | 9 |
| 1471 | 1466 | 1475 | 1478 | 9 |
| 1451 | 1479 | 1481 | 1482 | 9 |
| 1451 | 1479 | 1481 | 1483 | 9 |
| 1480 | 1479 | 1481 | 1482 | 9 |
| 1480 | 1479 | 1481 | 1483 | 9 |
| 1484 | 1479 | 1481 | 1482 | 9 |
| 1484 | 1479 | 1481 | 1483 | 9 |
| 1451 | 1479 | 1484 | 1485 | 9 |
| 1451 | 1479 | 1484 | 1486 | 9 |
| 1451 | 1479 | 1484 | 1487 | 9 |

|      |      |      |      |   |
|------|------|------|------|---|
| 1480 | 1479 | 1484 | 1485 | 9 |
| 1480 | 1479 | 1484 | 1486 | 9 |
| 1480 | 1479 | 1484 | 1487 | 9 |
| 1481 | 1479 | 1484 | 1485 | 9 |
| 1481 | 1479 | 1484 | 1486 | 9 |
| 1481 | 1479 | 1484 | 1487 | 9 |
| 1479 | 1484 | 1487 | 1488 | 9 |
| 1479 | 1484 | 1487 | 1489 | 9 |
| 1479 | 1484 | 1487 | 1514 | 9 |
| 1485 | 1484 | 1487 | 1488 | 9 |
| 1485 | 1484 | 1487 | 1489 | 9 |
| 1485 | 1484 | 1487 | 1514 | 9 |
| 1486 | 1484 | 1487 | 1488 | 9 |
| 1486 | 1484 | 1487 | 1489 | 9 |
| 1486 | 1484 | 1487 | 1514 | 9 |
| 1484 | 1487 | 1489 | 1490 | 9 |
| 1484 | 1487 | 1489 | 1491 | 9 |
| 1484 | 1487 | 1489 | 1492 | 9 |
| 1488 | 1487 | 1489 | 1490 | 9 |
| 1488 | 1487 | 1489 | 1491 | 9 |
| 1488 | 1487 | 1489 | 1492 | 9 |
| 1514 | 1487 | 1489 | 1490 | 9 |
| 1514 | 1487 | 1489 | 1491 | 9 |
| 1514 | 1487 | 1489 | 1492 | 9 |
| 1484 | 1487 | 1514 | 1515 | 9 |
| 1484 | 1487 | 1514 | 1516 | 9 |
| 1484 | 1487 | 1514 | 1542 | 9 |
| 1488 | 1487 | 1514 | 1515 | 9 |
| 1488 | 1487 | 1514 | 1516 | 9 |
| 1488 | 1487 | 1514 | 1542 | 9 |
| 1489 | 1487 | 1514 | 1515 | 9 |
| 1489 | 1487 | 1514 | 1516 | 9 |
| 1489 | 1487 | 1514 | 1542 | 9 |
| 1487 | 1489 | 1492 | 1493 | 9 |
| 1487 | 1489 | 1492 | 1494 | 9 |
| 1487 | 1489 | 1492 | 1495 | 9 |
| 1490 | 1489 | 1492 | 1493 | 9 |
| 1490 | 1489 | 1492 | 1494 | 9 |
| 1490 | 1489 | 1492 | 1495 | 9 |
| 1491 | 1489 | 1492 | 1493 | 9 |
| 1491 | 1489 | 1492 | 1494 | 9 |
| 1491 | 1489 | 1492 | 1495 | 9 |
| 1489 | 1492 | 1495 | 1496 | 9 |
| 1489 | 1492 | 1495 | 1497 | 9 |
| 1489 | 1492 | 1495 | 1498 | 9 |
| 1493 | 1492 | 1495 | 1496 | 9 |
| 1493 | 1492 | 1495 | 1497 | 9 |
| 1493 | 1492 | 1495 | 1498 | 9 |
| 1494 | 1492 | 1495 | 1496 | 9 |
| 1494 | 1492 | 1495 | 1497 | 9 |
| 1494 | 1492 | 1495 | 1498 | 9 |
| 1492 | 1495 | 1498 | 1499 | 9 |
| 1492 | 1495 | 1498 | 1500 | 9 |
| 1492 | 1495 | 1498 | 1501 | 9 |



|      |      |      |      |   |
|------|------|------|------|---|
| 1496 | 1495 | 1498 | 1499 | 9 |
| 1496 | 1495 | 1498 | 1500 | 9 |
| 1496 | 1495 | 1498 | 1501 | 9 |
| 1497 | 1495 | 1498 | 1499 | 9 |
| 1497 | 1495 | 1498 | 1500 | 9 |
| 1497 | 1495 | 1498 | 1501 | 9 |
| 1495 | 1498 | 1501 | 1502 | 9 |
| 1495 | 1498 | 1501 | 1503 | 9 |
| 1495 | 1498 | 1501 | 1504 | 9 |
| 1499 | 1498 | 1501 | 1502 | 9 |
| 1499 | 1498 | 1501 | 1503 | 9 |
| 1499 | 1498 | 1501 | 1504 | 9 |
| 1500 | 1498 | 1501 | 1502 | 9 |
| 1500 | 1498 | 1501 | 1503 | 9 |
| 1500 | 1498 | 1501 | 1504 | 9 |
| 1498 | 1501 | 1504 | 1505 | 9 |
| 1498 | 1501 | 1504 | 1506 | 9 |
| 1498 | 1501 | 1504 | 1507 | 9 |
| 1502 | 1501 | 1504 | 1505 | 9 |
| 1502 | 1501 | 1504 | 1506 | 9 |
| 1502 | 1501 | 1504 | 1507 | 9 |
| 1503 | 1501 | 1504 | 1505 | 9 |
| 1503 | 1501 | 1504 | 1506 | 9 |
| 1503 | 1501 | 1504 | 1507 | 9 |
| 1501 | 1504 | 1507 | 1508 | 9 |
| 1501 | 1504 | 1507 | 1509 | 9 |
| 1501 | 1504 | 1507 | 1510 | 9 |
| 1505 | 1504 | 1507 | 1508 | 9 |
| 1505 | 1504 | 1507 | 1509 | 9 |
| 1505 | 1504 | 1507 | 1510 | 9 |
| 1506 | 1504 | 1507 | 1508 | 9 |
| 1506 | 1504 | 1507 | 1509 | 9 |
| 1506 | 1504 | 1507 | 1510 | 9 |
| 1504 | 1507 | 1510 | 1511 | 9 |
| 1504 | 1507 | 1510 | 1512 | 9 |
| 1504 | 1507 | 1510 | 1513 | 9 |
| 1508 | 1507 | 1510 | 1511 | 9 |
| 1508 | 1507 | 1510 | 1512 | 9 |
| 1508 | 1507 | 1510 | 1513 | 9 |
| 1509 | 1507 | 1510 | 1511 | 9 |
| 1509 | 1507 | 1510 | 1512 | 9 |
| 1509 | 1507 | 1510 | 1513 | 9 |
| 1487 | 1514 | 1516 | 1517 | 9 |
| 1487 | 1514 | 1516 | 1518 | 9 |
| 1515 | 1514 | 1516 | 1517 | 9 |
| 1515 | 1514 | 1516 | 1518 | 9 |
| 1542 | 1514 | 1516 | 1517 | 9 |
| 1542 | 1514 | 1516 | 1518 | 9 |
| 1487 | 1514 | 1542 | 1543 | 9 |
| 1487 | 1514 | 1542 | 1544 | 9 |
| 1487 | 1514 | 1542 | 1547 | 9 |
| 1515 | 1514 | 1542 | 1543 | 9 |
| 1515 | 1514 | 1542 | 1544 | 9 |
| 1515 | 1514 | 1542 | 1547 | 9 |

|      |      |      |      |   |
|------|------|------|------|---|
| 1516 | 1514 | 1542 | 1543 | 9 |
| 1516 | 1514 | 1542 | 1544 | 9 |
| 1516 | 1514 | 1542 | 1547 | 9 |
| 1514 | 1516 | 1518 | 1519 | 9 |
| 1514 | 1516 | 1518 | 1520 | 9 |
| 1517 | 1516 | 1518 | 1519 | 9 |
| 1517 | 1516 | 1518 | 1520 | 9 |
| 1516 | 1518 | 1520 | 1521 | 9 |
| 1516 | 1518 | 1520 | 1522 | 9 |
| 1516 | 1518 | 1520 | 1523 | 9 |
| 1519 | 1518 | 1520 | 1521 | 9 |
| 1519 | 1518 | 1520 | 1522 | 9 |
| 1519 | 1518 | 1520 | 1523 | 9 |
| 1518 | 1520 | 1523 | 1524 | 9 |
| 1518 | 1520 | 1523 | 1525 | 9 |
| 1518 | 1520 | 1523 | 1526 | 9 |
| 1521 | 1520 | 1523 | 1524 | 9 |
| 1521 | 1520 | 1523 | 1525 | 9 |
| 1521 | 1520 | 1523 | 1526 | 9 |
| 1522 | 1520 | 1523 | 1524 | 9 |
| 1522 | 1520 | 1523 | 1525 | 9 |
| 1522 | 1520 | 1523 | 1526 | 9 |
| 1520 | 1523 | 1526 | 1527 | 9 |
| 1520 | 1523 | 1526 | 1528 | 9 |
| 1520 | 1523 | 1526 | 1529 | 9 |
| 1524 | 1523 | 1526 | 1527 | 9 |
| 1524 | 1523 | 1526 | 1528 | 9 |
| 1524 | 1523 | 1526 | 1529 | 9 |
| 1525 | 1523 | 1526 | 1527 | 9 |
| 1525 | 1523 | 1526 | 1528 | 9 |
| 1525 | 1523 | 1526 | 1529 | 9 |
| 1523 | 1526 | 1529 | 1530 | 9 |
| 1523 | 1526 | 1529 | 1534 | 9 |
| 1523 | 1526 | 1529 | 1538 | 9 |
| 1527 | 1526 | 1529 | 1530 | 9 |
| 1527 | 1526 | 1529 | 1534 | 9 |
| 1527 | 1526 | 1529 | 1538 | 9 |
| 1528 | 1526 | 1529 | 1530 | 9 |
| 1528 | 1526 | 1529 | 1534 | 9 |
| 1528 | 1526 | 1529 | 1538 | 9 |
| 1526 | 1529 | 1530 | 1531 | 9 |
| 1526 | 1529 | 1530 | 1532 | 9 |
| 1526 | 1529 | 1530 | 1533 | 9 |
| 1534 | 1529 | 1530 | 1531 | 9 |
| 1534 | 1529 | 1530 | 1532 | 9 |
| 1534 | 1529 | 1530 | 1533 | 9 |
| 1538 | 1529 | 1530 | 1531 | 9 |
| 1538 | 1529 | 1530 | 1532 | 9 |
| 1538 | 1529 | 1530 | 1533 | 9 |
| 1526 | 1529 | 1534 | 1535 | 9 |
| 1526 | 1529 | 1534 | 1536 | 9 |
| 1526 | 1529 | 1534 | 1537 | 9 |
| 1530 | 1529 | 1534 | 1535 | 9 |
| 1530 | 1529 | 1534 | 1536 | 9 |

|      |      |      |      |   |
|------|------|------|------|---|
| 1530 | 1529 | 1534 | 1537 | 9 |
| 1538 | 1529 | 1534 | 1535 | 9 |
| 1538 | 1529 | 1534 | 1536 | 9 |
| 1538 | 1529 | 1534 | 1537 | 9 |
| 1526 | 1529 | 1538 | 1539 | 9 |
| 1526 | 1529 | 1538 | 1540 | 9 |
| 1526 | 1529 | 1538 | 1541 | 9 |
| 1530 | 1529 | 1538 | 1539 | 9 |
| 1530 | 1529 | 1538 | 1540 | 9 |
| 1530 | 1529 | 1538 | 1541 | 9 |
| 1534 | 1529 | 1538 | 1539 | 9 |
| 1534 | 1529 | 1538 | 1540 | 9 |
| 1534 | 1529 | 1538 | 1541 | 9 |
| 1514 | 1542 | 1544 | 1545 | 9 |
| 1514 | 1542 | 1544 | 1546 | 9 |
| 1543 | 1542 | 1544 | 1545 | 9 |
| 1543 | 1542 | 1544 | 1546 | 9 |
| 1547 | 1542 | 1544 | 1545 | 9 |
| 1547 | 1542 | 1544 | 1546 | 9 |
| 1514 | 1542 | 1547 | 1548 | 9 |
| 1514 | 1542 | 1547 | 1549 | 9 |
| 1514 | 1542 | 1547 | 1550 | 9 |
| 1543 | 1542 | 1547 | 1548 | 9 |
| 1543 | 1542 | 1547 | 1549 | 9 |
| 1543 | 1542 | 1547 | 1550 | 9 |
| 1544 | 1542 | 1547 | 1548 | 9 |
| 1544 | 1542 | 1547 | 1549 | 9 |
| 1544 | 1542 | 1547 | 1550 | 9 |
| 1542 | 1547 | 1550 | 1551 | 9 |
| 1542 | 1547 | 1550 | 1552 | 9 |
| 1542 | 1547 | 1550 | 1577 | 9 |
| 1548 | 1547 | 1550 | 1551 | 9 |
| 1548 | 1547 | 1550 | 1552 | 9 |
| 1548 | 1547 | 1550 | 1577 | 9 |
| 1549 | 1547 | 1550 | 1551 | 9 |
| 1549 | 1547 | 1550 | 1552 | 9 |
| 1549 | 1547 | 1550 | 1577 | 9 |
| 1547 | 1550 | 1552 | 1553 | 9 |
| 1547 | 1550 | 1552 | 1554 | 9 |
| 1547 | 1550 | 1552 | 1555 | 9 |
| 1551 | 1550 | 1552 | 1553 | 9 |
| 1551 | 1550 | 1552 | 1554 | 9 |
| 1551 | 1550 | 1552 | 1555 | 9 |
| 1577 | 1550 | 1552 | 1553 | 9 |
| 1577 | 1550 | 1552 | 1554 | 9 |
| 1577 | 1550 | 1552 | 1555 | 9 |
| 1547 | 1550 | 1577 | 1578 | 9 |
| 1547 | 1550 | 1577 | 1579 | 9 |
| 1547 | 1550 | 1577 | 1605 | 9 |
| 1551 | 1550 | 1577 | 1578 | 9 |
| 1551 | 1550 | 1577 | 1579 | 9 |
| 1551 | 1550 | 1577 | 1605 | 9 |
| 1552 | 1550 | 1577 | 1578 | 9 |
| 1552 | 1550 | 1577 | 1579 | 9 |

|      |      |      |      |   |
|------|------|------|------|---|
| 1552 | 1550 | 1577 | 1605 | 9 |
| 1550 | 1552 | 1555 | 1556 | 9 |
| 1550 | 1552 | 1555 | 1557 | 9 |
| 1550 | 1552 | 1555 | 1558 | 9 |
| 1553 | 1552 | 1555 | 1556 | 9 |
| 1553 | 1552 | 1555 | 1557 | 9 |
| 1553 | 1552 | 1555 | 1558 | 9 |
| 1554 | 1552 | 1555 | 1556 | 9 |
| 1554 | 1552 | 1555 | 1557 | 9 |
| 1554 | 1552 | 1555 | 1558 | 9 |
| 1552 | 1555 | 1558 | 1559 | 9 |
| 1552 | 1555 | 1558 | 1560 | 9 |
| 1552 | 1555 | 1558 | 1561 | 9 |
| 1556 | 1555 | 1558 | 1559 | 9 |
| 1556 | 1555 | 1558 | 1560 | 9 |
| 1556 | 1555 | 1558 | 1561 | 9 |
| 1557 | 1555 | 1558 | 1559 | 9 |
| 1557 | 1555 | 1558 | 1560 | 9 |
| 1557 | 1555 | 1558 | 1561 | 9 |
| 1555 | 1558 | 1561 | 1562 | 9 |
| 1555 | 1558 | 1561 | 1563 | 9 |
| 1555 | 1558 | 1561 | 1564 | 9 |
| 1559 | 1558 | 1561 | 1562 | 9 |
| 1559 | 1558 | 1561 | 1563 | 9 |
| 1559 | 1558 | 1561 | 1564 | 9 |
| 1560 | 1558 | 1561 | 1562 | 9 |
| 1560 | 1558 | 1561 | 1563 | 9 |
| 1560 | 1558 | 1561 | 1564 | 9 |
| 1558 | 1561 | 1564 | 1565 | 9 |
| 1558 | 1561 | 1564 | 1566 | 9 |
| 1558 | 1561 | 1564 | 1567 | 9 |
| 1562 | 1561 | 1564 | 1565 | 9 |
| 1562 | 1561 | 1564 | 1566 | 9 |
| 1562 | 1561 | 1564 | 1567 | 9 |
| 1563 | 1561 | 1564 | 1565 | 9 |
| 1563 | 1561 | 1564 | 1566 | 9 |
| 1563 | 1561 | 1564 | 1567 | 9 |
| 1561 | 1564 | 1567 | 1568 | 9 |
| 1561 | 1564 | 1567 | 1569 | 9 |
| 1561 | 1564 | 1567 | 1570 | 9 |
| 1565 | 1564 | 1567 | 1568 | 9 |
| 1565 | 1564 | 1567 | 1569 | 9 |
| 1565 | 1564 | 1567 | 1570 | 9 |
| 1566 | 1564 | 1567 | 1568 | 9 |
| 1566 | 1564 | 1567 | 1569 | 9 |
| 1566 | 1564 | 1567 | 1570 | 9 |
| 1564 | 1567 | 1570 | 1571 | 9 |
| 1564 | 1567 | 1570 | 1572 | 9 |
| 1564 | 1567 | 1570 | 1573 | 9 |
| 1568 | 1567 | 1570 | 1571 | 9 |
| 1568 | 1567 | 1570 | 1572 | 9 |
| 1568 | 1567 | 1570 | 1573 | 9 |
| 1569 | 1567 | 1570 | 1571 | 9 |
| 1569 | 1567 | 1570 | 1572 | 9 |

|      |      |      |      |   |
|------|------|------|------|---|
| 1569 | 1567 | 1570 | 1573 | 9 |
| 1567 | 1570 | 1573 | 1574 | 9 |
| 1567 | 1570 | 1573 | 1575 | 9 |
| 1567 | 1570 | 1573 | 1576 | 9 |
| 1571 | 1570 | 1573 | 1574 | 9 |
| 1571 | 1570 | 1573 | 1575 | 9 |
| 1571 | 1570 | 1573 | 1576 | 9 |
| 1572 | 1570 | 1573 | 1574 | 9 |
| 1572 | 1570 | 1573 | 1575 | 9 |
| 1572 | 1570 | 1573 | 1576 | 9 |
| 1550 | 1577 | 1579 | 1580 | 9 |
| 1550 | 1577 | 1579 | 1581 | 9 |
| 1578 | 1577 | 1579 | 1580 | 9 |
| 1578 | 1577 | 1579 | 1581 | 9 |
| 1605 | 1577 | 1579 | 1580 | 9 |
| 1605 | 1577 | 1579 | 1581 | 9 |
| 1550 | 1577 | 1605 | 1606 | 9 |
| 1550 | 1577 | 1605 | 1607 | 9 |
| 1550 | 1577 | 1605 | 1610 | 9 |
| 1578 | 1577 | 1605 | 1606 | 9 |
| 1578 | 1577 | 1605 | 1607 | 9 |
| 1578 | 1577 | 1605 | 1610 | 9 |
| 1579 | 1577 | 1605 | 1606 | 9 |
| 1579 | 1577 | 1605 | 1607 | 9 |
| 1579 | 1577 | 1605 | 1610 | 9 |
| 1577 | 1579 | 1581 | 1582 | 9 |
| 1577 | 1579 | 1581 | 1583 | 9 |
| 1580 | 1579 | 1581 | 1582 | 9 |
| 1580 | 1579 | 1581 | 1583 | 9 |
| 1579 | 1581 | 1583 | 1584 | 9 |
| 1579 | 1581 | 1583 | 1585 | 9 |
| 1579 | 1581 | 1583 | 1586 | 9 |
| 1582 | 1581 | 1583 | 1584 | 9 |
| 1582 | 1581 | 1583 | 1585 | 9 |
| 1582 | 1581 | 1583 | 1586 | 9 |
| 1581 | 1583 | 1586 | 1587 | 9 |
| 1581 | 1583 | 1586 | 1588 | 9 |
| 1581 | 1583 | 1586 | 1589 | 9 |
| 1584 | 1583 | 1586 | 1587 | 9 |
| 1584 | 1583 | 1586 | 1588 | 9 |
| 1584 | 1583 | 1586 | 1589 | 9 |
| 1585 | 1583 | 1586 | 1587 | 9 |
| 1585 | 1583 | 1586 | 1588 | 9 |
| 1585 | 1583 | 1586 | 1589 | 9 |
| 1583 | 1586 | 1589 | 1590 | 9 |
| 1583 | 1586 | 1589 | 1591 | 9 |
| 1583 | 1586 | 1589 | 1592 | 9 |
| 1587 | 1586 | 1589 | 1590 | 9 |
| 1587 | 1586 | 1589 | 1591 | 9 |
| 1587 | 1586 | 1589 | 1592 | 9 |
| 1588 | 1586 | 1589 | 1590 | 9 |
| 1588 | 1586 | 1589 | 1591 | 9 |
| 1588 | 1586 | 1589 | 1592 | 9 |
| 1586 | 1589 | 1592 | 1593 | 9 |

|      |      |      |      |   |
|------|------|------|------|---|
| 1586 | 1589 | 1592 | 1597 | 9 |
| 1586 | 1589 | 1592 | 1601 | 9 |
| 1590 | 1589 | 1592 | 1593 | 9 |
| 1590 | 1589 | 1592 | 1597 | 9 |
| 1590 | 1589 | 1592 | 1601 | 9 |
| 1591 | 1589 | 1592 | 1593 | 9 |
| 1591 | 1589 | 1592 | 1597 | 9 |
| 1591 | 1589 | 1592 | 1601 | 9 |
| 1589 | 1592 | 1593 | 1594 | 9 |
| 1589 | 1592 | 1593 | 1595 | 9 |
| 1589 | 1592 | 1593 | 1596 | 9 |
| 1597 | 1592 | 1593 | 1594 | 9 |
| 1597 | 1592 | 1593 | 1595 | 9 |
| 1597 | 1592 | 1593 | 1596 | 9 |
| 1601 | 1592 | 1593 | 1594 | 9 |
| 1601 | 1592 | 1593 | 1595 | 9 |
| 1601 | 1592 | 1593 | 1596 | 9 |
| 1589 | 1592 | 1597 | 1598 | 9 |
| 1589 | 1592 | 1597 | 1599 | 9 |
| 1589 | 1592 | 1597 | 1600 | 9 |
| 1593 | 1592 | 1597 | 1598 | 9 |
| 1593 | 1592 | 1597 | 1599 | 9 |
| 1593 | 1592 | 1597 | 1600 | 9 |
| 1601 | 1592 | 1597 | 1598 | 9 |
| 1601 | 1592 | 1597 | 1599 | 9 |
| 1601 | 1592 | 1597 | 1600 | 9 |
| 1589 | 1592 | 1601 | 1602 | 9 |
| 1589 | 1592 | 1601 | 1603 | 9 |
| 1589 | 1592 | 1601 | 1604 | 9 |
| 1593 | 1592 | 1601 | 1602 | 9 |
| 1593 | 1592 | 1601 | 1603 | 9 |
| 1593 | 1592 | 1601 | 1604 | 9 |
| 1597 | 1592 | 1601 | 1602 | 9 |
| 1597 | 1592 | 1601 | 1603 | 9 |
| 1597 | 1592 | 1601 | 1604 | 9 |
| 1577 | 1605 | 1607 | 1608 | 9 |
| 1577 | 1605 | 1607 | 1609 | 9 |
| 1606 | 1605 | 1607 | 1608 | 9 |
| 1606 | 1605 | 1607 | 1609 | 9 |
| 1610 | 1605 | 1607 | 1608 | 9 |
| 1610 | 1605 | 1607 | 1609 | 9 |
| 1577 | 1605 | 1610 | 1611 | 9 |
| 1577 | 1605 | 1610 | 1612 | 9 |
| 1577 | 1605 | 1610 | 1613 | 9 |
| 1606 | 1605 | 1610 | 1611 | 9 |
| 1606 | 1605 | 1610 | 1612 | 9 |
| 1606 | 1605 | 1610 | 1613 | 9 |
| 1607 | 1605 | 1610 | 1611 | 9 |
| 1607 | 1605 | 1610 | 1612 | 9 |
| 1607 | 1605 | 1610 | 1613 | 9 |
| 1605 | 1610 | 1613 | 1614 | 9 |
| 1605 | 1610 | 1613 | 1615 | 9 |
| 1605 | 1610 | 1613 | 1640 | 9 |
| 1611 | 1610 | 1613 | 1614 | 9 |

|      |      |      |      |   |
|------|------|------|------|---|
| 1611 | 1610 | 1613 | 1615 | 9 |
| 1611 | 1610 | 1613 | 1640 | 9 |
| 1612 | 1610 | 1613 | 1614 | 9 |
| 1612 | 1610 | 1613 | 1615 | 9 |
| 1612 | 1610 | 1613 | 1640 | 9 |
| 1610 | 1613 | 1615 | 1616 | 9 |
| 1610 | 1613 | 1615 | 1617 | 9 |
| 1610 | 1613 | 1615 | 1618 | 9 |
| 1614 | 1613 | 1615 | 1616 | 9 |
| 1614 | 1613 | 1615 | 1617 | 9 |
| 1614 | 1613 | 1615 | 1618 | 9 |
| 1640 | 1613 | 1615 | 1616 | 9 |
| 1640 | 1613 | 1615 | 1617 | 9 |
| 1640 | 1613 | 1615 | 1618 | 9 |
| 1610 | 1613 | 1640 | 1641 | 9 |
| 1610 | 1613 | 1640 | 1642 | 9 |
| 1610 | 1613 | 1640 | 1668 | 9 |
| 1614 | 1613 | 1640 | 1641 | 9 |
| 1614 | 1613 | 1640 | 1642 | 9 |
| 1614 | 1613 | 1640 | 1668 | 9 |
| 1615 | 1613 | 1640 | 1641 | 9 |
| 1615 | 1613 | 1640 | 1642 | 9 |
| 1615 | 1613 | 1640 | 1668 | 9 |
| 1613 | 1615 | 1618 | 1619 | 9 |
| 1613 | 1615 | 1618 | 1620 | 9 |
| 1613 | 1615 | 1618 | 1621 | 9 |
| 1616 | 1615 | 1618 | 1619 | 9 |
| 1616 | 1615 | 1618 | 1620 | 9 |
| 1616 | 1615 | 1618 | 1621 | 9 |
| 1617 | 1615 | 1618 | 1619 | 9 |
| 1617 | 1615 | 1618 | 1620 | 9 |
| 1617 | 1615 | 1618 | 1621 | 9 |
| 1615 | 1618 | 1621 | 1622 | 9 |
| 1615 | 1618 | 1621 | 1623 | 9 |
| 1615 | 1618 | 1621 | 1624 | 9 |
| 1619 | 1618 | 1621 | 1622 | 9 |
| 1619 | 1618 | 1621 | 1623 | 9 |
| 1619 | 1618 | 1621 | 1624 | 9 |
| 1620 | 1618 | 1621 | 1622 | 9 |
| 1620 | 1618 | 1621 | 1623 | 9 |
| 1620 | 1618 | 1621 | 1624 | 9 |
| 1618 | 1621 | 1624 | 1625 | 9 |
| 1618 | 1621 | 1624 | 1626 | 9 |
| 1618 | 1621 | 1624 | 1627 | 9 |
| 1622 | 1621 | 1624 | 1625 | 9 |
| 1622 | 1621 | 1624 | 1626 | 9 |
| 1622 | 1621 | 1624 | 1627 | 9 |
| 1623 | 1621 | 1624 | 1625 | 9 |
| 1623 | 1621 | 1624 | 1626 | 9 |
| 1623 | 1621 | 1624 | 1627 | 9 |
| 1621 | 1624 | 1627 | 1628 | 9 |
| 1621 | 1624 | 1627 | 1629 | 9 |
| 1621 | 1624 | 1627 | 1630 | 9 |
| 1625 | 1624 | 1627 | 1628 | 9 |

|      |      |      |      |   |
|------|------|------|------|---|
| 1625 | 1624 | 1627 | 1629 | 9 |
| 1625 | 1624 | 1627 | 1630 | 9 |
| 1626 | 1624 | 1627 | 1628 | 9 |
| 1626 | 1624 | 1627 | 1629 | 9 |
| 1626 | 1624 | 1627 | 1630 | 9 |
| 1624 | 1627 | 1630 | 1631 | 9 |
| 1624 | 1627 | 1630 | 1632 | 9 |
| 1624 | 1627 | 1630 | 1633 | 9 |
| 1628 | 1627 | 1630 | 1631 | 9 |
| 1628 | 1627 | 1630 | 1632 | 9 |
| 1628 | 1627 | 1630 | 1633 | 9 |
| 1629 | 1627 | 1630 | 1631 | 9 |
| 1629 | 1627 | 1630 | 1632 | 9 |
| 1629 | 1627 | 1630 | 1633 | 9 |
| 1627 | 1630 | 1633 | 1634 | 9 |
| 1627 | 1630 | 1633 | 1635 | 9 |
| 1627 | 1630 | 1633 | 1636 | 9 |
| 1631 | 1630 | 1633 | 1634 | 9 |
| 1631 | 1630 | 1633 | 1635 | 9 |
| 1631 | 1630 | 1633 | 1636 | 9 |
| 1632 | 1630 | 1633 | 1634 | 9 |
| 1632 | 1630 | 1633 | 1635 | 9 |
| 1632 | 1630 | 1633 | 1636 | 9 |
| 1630 | 1633 | 1636 | 1637 | 9 |
| 1630 | 1633 | 1636 | 1638 | 9 |
| 1630 | 1633 | 1636 | 1639 | 9 |
| 1634 | 1633 | 1636 | 1637 | 9 |
| 1634 | 1633 | 1636 | 1638 | 9 |
| 1634 | 1633 | 1636 | 1639 | 9 |
| 1635 | 1633 | 1636 | 1637 | 9 |
| 1635 | 1633 | 1636 | 1638 | 9 |
| 1635 | 1633 | 1636 | 1639 | 9 |
| 1613 | 1640 | 1642 | 1643 | 9 |
| 1613 | 1640 | 1642 | 1644 | 9 |
| 1641 | 1640 | 1642 | 1643 | 9 |
| 1641 | 1640 | 1642 | 1644 | 9 |
| 1668 | 1640 | 1642 | 1643 | 9 |
| 1668 | 1640 | 1642 | 1644 | 9 |
| 1613 | 1640 | 1668 | 1669 | 9 |
| 1613 | 1640 | 1668 | 1670 | 9 |
| 1613 | 1640 | 1668 | 1673 | 9 |
| 1641 | 1640 | 1668 | 1669 | 9 |
| 1641 | 1640 | 1668 | 1670 | 9 |
| 1641 | 1640 | 1668 | 1673 | 9 |
| 1642 | 1640 | 1668 | 1669 | 9 |
| 1642 | 1640 | 1668 | 1670 | 9 |
| 1642 | 1640 | 1668 | 1673 | 9 |
| 1640 | 1642 | 1644 | 1645 | 9 |
| 1640 | 1642 | 1644 | 1646 | 9 |
| 1643 | 1642 | 1644 | 1645 | 9 |
| 1643 | 1642 | 1644 | 1646 | 9 |
| 1642 | 1644 | 1646 | 1647 | 9 |
| 1642 | 1644 | 1646 | 1648 | 9 |
| 1642 | 1644 | 1646 | 1649 | 9 |



|      |      |      |      |   |
|------|------|------|------|---|
| 1645 | 1644 | 1646 | 1647 | 9 |
| 1645 | 1644 | 1646 | 1648 | 9 |
| 1645 | 1644 | 1646 | 1649 | 9 |
| 1644 | 1646 | 1649 | 1650 | 9 |
| 1644 | 1646 | 1649 | 1651 | 9 |
| 1644 | 1646 | 1649 | 1652 | 9 |
| 1647 | 1646 | 1649 | 1650 | 9 |
| 1647 | 1646 | 1649 | 1651 | 9 |
| 1647 | 1646 | 1649 | 1652 | 9 |
| 1648 | 1646 | 1649 | 1650 | 9 |
| 1648 | 1646 | 1649 | 1651 | 9 |
| 1648 | 1646 | 1649 | 1652 | 9 |
| 1646 | 1649 | 1652 | 1653 | 9 |
| 1646 | 1649 | 1652 | 1654 | 9 |
| 1646 | 1649 | 1652 | 1655 | 9 |
| 1650 | 1649 | 1652 | 1653 | 9 |
| 1650 | 1649 | 1652 | 1654 | 9 |
| 1650 | 1649 | 1652 | 1655 | 9 |
| 1651 | 1649 | 1652 | 1653 | 9 |
| 1651 | 1649 | 1652 | 1654 | 9 |
| 1651 | 1649 | 1652 | 1655 | 9 |
| 1649 | 1652 | 1655 | 1656 | 9 |
| 1649 | 1652 | 1655 | 1660 | 9 |
| 1649 | 1652 | 1655 | 1664 | 9 |
| 1653 | 1652 | 1655 | 1656 | 9 |
| 1653 | 1652 | 1655 | 1660 | 9 |
| 1653 | 1652 | 1655 | 1664 | 9 |
| 1654 | 1652 | 1655 | 1656 | 9 |
| 1654 | 1652 | 1655 | 1660 | 9 |
| 1654 | 1652 | 1655 | 1664 | 9 |
| 1652 | 1655 | 1656 | 1657 | 9 |
| 1652 | 1655 | 1656 | 1658 | 9 |
| 1652 | 1655 | 1656 | 1659 | 9 |
| 1660 | 1655 | 1656 | 1657 | 9 |
| 1660 | 1655 | 1656 | 1658 | 9 |
| 1660 | 1655 | 1656 | 1659 | 9 |
| 1664 | 1655 | 1656 | 1657 | 9 |
| 1664 | 1655 | 1656 | 1658 | 9 |
| 1664 | 1655 | 1656 | 1659 | 9 |
| 1652 | 1655 | 1660 | 1661 | 9 |
| 1652 | 1655 | 1660 | 1662 | 9 |
| 1652 | 1655 | 1660 | 1663 | 9 |
| 1656 | 1655 | 1660 | 1661 | 9 |
| 1656 | 1655 | 1660 | 1662 | 9 |
| 1656 | 1655 | 1660 | 1663 | 9 |
| 1664 | 1655 | 1660 | 1661 | 9 |
| 1664 | 1655 | 1660 | 1662 | 9 |
| 1664 | 1655 | 1660 | 1663 | 9 |
| 1652 | 1655 | 1664 | 1665 | 9 |
| 1652 | 1655 | 1664 | 1666 | 9 |
| 1652 | 1655 | 1664 | 1667 | 9 |
| 1656 | 1655 | 1664 | 1665 | 9 |
| 1656 | 1655 | 1664 | 1666 | 9 |
| 1656 | 1655 | 1664 | 1667 | 9 |

|      |      |      |      |   |
|------|------|------|------|---|
| 1660 | 1655 | 1664 | 1665 | 9 |
| 1660 | 1655 | 1664 | 1666 | 9 |
| 1660 | 1655 | 1664 | 1667 | 9 |
| 1640 | 1668 | 1670 | 1671 | 9 |
| 1640 | 1668 | 1670 | 1672 | 9 |
| 1669 | 1668 | 1670 | 1671 | 9 |
| 1669 | 1668 | 1670 | 1672 | 9 |
| 1673 | 1668 | 1670 | 1671 | 9 |
| 1673 | 1668 | 1670 | 1672 | 9 |
| 1640 | 1668 | 1673 | 1674 | 9 |
| 1640 | 1668 | 1673 | 1675 | 9 |
| 1640 | 1668 | 1673 | 1676 | 9 |
| 1669 | 1668 | 1673 | 1674 | 9 |
| 1669 | 1668 | 1673 | 1675 | 9 |
| 1669 | 1668 | 1673 | 1676 | 9 |
| 1670 | 1668 | 1673 | 1674 | 9 |
| 1670 | 1668 | 1673 | 1675 | 9 |
| 1670 | 1668 | 1673 | 1676 | 9 |
| 1668 | 1673 | 1676 | 1677 | 9 |
| 1668 | 1673 | 1676 | 1678 | 9 |
| 1668 | 1673 | 1676 | 1703 | 9 |
| 1674 | 1673 | 1676 | 1677 | 9 |
| 1674 | 1673 | 1676 | 1678 | 9 |
| 1674 | 1673 | 1676 | 1703 | 9 |
| 1675 | 1673 | 1676 | 1677 | 9 |
| 1675 | 1673 | 1676 | 1678 | 9 |
| 1675 | 1673 | 1676 | 1703 | 9 |
| 1673 | 1676 | 1678 | 1679 | 9 |
| 1673 | 1676 | 1678 | 1680 | 9 |
| 1673 | 1676 | 1678 | 1681 | 9 |
| 1677 | 1676 | 1678 | 1679 | 9 |
| 1677 | 1676 | 1678 | 1680 | 9 |
| 1677 | 1676 | 1678 | 1681 | 9 |
| 1703 | 1676 | 1678 | 1679 | 9 |
| 1703 | 1676 | 1678 | 1680 | 9 |
| 1703 | 1676 | 1678 | 1681 | 9 |
| 1673 | 1676 | 1703 | 1704 | 9 |
| 1673 | 1676 | 1703 | 1705 | 9 |
| 1673 | 1676 | 1703 | 1731 | 9 |
| 1677 | 1676 | 1703 | 1704 | 9 |
| 1677 | 1676 | 1703 | 1705 | 9 |
| 1677 | 1676 | 1703 | 1731 | 9 |
| 1678 | 1676 | 1703 | 1704 | 9 |
| 1678 | 1676 | 1703 | 1705 | 9 |
| 1678 | 1676 | 1703 | 1731 | 9 |
| 1676 | 1678 | 1681 | 1682 | 9 |
| 1676 | 1678 | 1681 | 1683 | 9 |
| 1676 | 1678 | 1681 | 1684 | 9 |
| 1679 | 1678 | 1681 | 1682 | 9 |
| 1679 | 1678 | 1681 | 1683 | 9 |
| 1679 | 1678 | 1681 | 1684 | 9 |
| 1680 | 1678 | 1681 | 1682 | 9 |
| 1680 | 1678 | 1681 | 1683 | 9 |
| 1680 | 1678 | 1681 | 1684 | 9 |

|      |      |      |      |   |
|------|------|------|------|---|
| 1678 | 1681 | 1684 | 1685 | 9 |
| 1678 | 1681 | 1684 | 1686 | 9 |
| 1678 | 1681 | 1684 | 1687 | 9 |
| 1682 | 1681 | 1684 | 1685 | 9 |
| 1682 | 1681 | 1684 | 1686 | 9 |
| 1682 | 1681 | 1684 | 1687 | 9 |
| 1683 | 1681 | 1684 | 1685 | 9 |
| 1683 | 1681 | 1684 | 1686 | 9 |
| 1683 | 1681 | 1684 | 1687 | 9 |
| 1681 | 1684 | 1687 | 1688 | 9 |
| 1681 | 1684 | 1687 | 1689 | 9 |
| 1681 | 1684 | 1687 | 1690 | 9 |
| 1685 | 1684 | 1687 | 1688 | 9 |
| 1685 | 1684 | 1687 | 1689 | 9 |
| 1685 | 1684 | 1687 | 1690 | 9 |
| 1686 | 1684 | 1687 | 1688 | 9 |
| 1686 | 1684 | 1687 | 1689 | 9 |
| 1686 | 1684 | 1687 | 1690 | 9 |
| 1684 | 1687 | 1690 | 1691 | 9 |
| 1684 | 1687 | 1690 | 1692 | 9 |
| 1684 | 1687 | 1690 | 1693 | 9 |
| 1688 | 1687 | 1690 | 1691 | 9 |
| 1688 | 1687 | 1690 | 1692 | 9 |
| 1688 | 1687 | 1690 | 1693 | 9 |
| 1689 | 1687 | 1690 | 1691 | 9 |
| 1689 | 1687 | 1690 | 1692 | 9 |
| 1689 | 1687 | 1690 | 1693 | 9 |
| 1687 | 1690 | 1693 | 1694 | 9 |
| 1687 | 1690 | 1693 | 1695 | 9 |
| 1687 | 1690 | 1693 | 1696 | 9 |
| 1691 | 1690 | 1693 | 1694 | 9 |
| 1691 | 1690 | 1693 | 1695 | 9 |
| 1691 | 1690 | 1693 | 1696 | 9 |
| 1692 | 1690 | 1693 | 1694 | 9 |
| 1692 | 1690 | 1693 | 1695 | 9 |
| 1692 | 1690 | 1693 | 1696 | 9 |
| 1690 | 1693 | 1696 | 1697 | 9 |
| 1690 | 1693 | 1696 | 1698 | 9 |
| 1690 | 1693 | 1696 | 1699 | 9 |
| 1694 | 1693 | 1696 | 1697 | 9 |
| 1694 | 1693 | 1696 | 1698 | 9 |
| 1694 | 1693 | 1696 | 1699 | 9 |
| 1695 | 1693 | 1696 | 1697 | 9 |
| 1695 | 1693 | 1696 | 1698 | 9 |
| 1695 | 1693 | 1696 | 1699 | 9 |
| 1693 | 1696 | 1699 | 1700 | 9 |
| 1693 | 1696 | 1699 | 1701 | 9 |
| 1693 | 1696 | 1699 | 1702 | 9 |
| 1697 | 1696 | 1699 | 1700 | 9 |
| 1697 | 1696 | 1699 | 1701 | 9 |
| 1697 | 1696 | 1699 | 1702 | 9 |
| 1698 | 1696 | 1699 | 1700 | 9 |
| 1698 | 1696 | 1699 | 1701 | 9 |
| 1698 | 1696 | 1699 | 1702 | 9 |

|      |      |      |      |   |
|------|------|------|------|---|
| 1676 | 1703 | 1705 | 1706 | 9 |
| 1676 | 1703 | 1705 | 1707 | 9 |
| 1704 | 1703 | 1705 | 1706 | 9 |
| 1704 | 1703 | 1705 | 1707 | 9 |
| 1731 | 1703 | 1705 | 1706 | 9 |
| 1731 | 1703 | 1705 | 1707 | 9 |
| 1676 | 1703 | 1731 | 1732 | 9 |
| 1676 | 1703 | 1731 | 1733 | 9 |
| 1676 | 1703 | 1731 | 1736 | 9 |
| 1704 | 1703 | 1731 | 1732 | 9 |
| 1704 | 1703 | 1731 | 1733 | 9 |
| 1704 | 1703 | 1731 | 1736 | 9 |
| 1705 | 1703 | 1731 | 1732 | 9 |
| 1705 | 1703 | 1731 | 1733 | 9 |
| 1705 | 1703 | 1731 | 1736 | 9 |
| 1703 | 1705 | 1707 | 1708 | 9 |
| 1703 | 1705 | 1707 | 1709 | 9 |
| 1706 | 1705 | 1707 | 1708 | 9 |
| 1706 | 1705 | 1707 | 1709 | 9 |
| 1705 | 1707 | 1709 | 1710 | 9 |
| 1705 | 1707 | 1709 | 1711 | 9 |
| 1705 | 1707 | 1709 | 1712 | 9 |
| 1708 | 1707 | 1709 | 1710 | 9 |
| 1708 | 1707 | 1709 | 1711 | 9 |
| 1708 | 1707 | 1709 | 1712 | 9 |
| 1707 | 1709 | 1712 | 1713 | 9 |
| 1707 | 1709 | 1712 | 1714 | 9 |
| 1707 | 1709 | 1712 | 1715 | 9 |
| 1710 | 1709 | 1712 | 1713 | 9 |
| 1710 | 1709 | 1712 | 1714 | 9 |
| 1710 | 1709 | 1712 | 1715 | 9 |
| 1711 | 1709 | 1712 | 1713 | 9 |
| 1711 | 1709 | 1712 | 1714 | 9 |
| 1711 | 1709 | 1712 | 1715 | 9 |
| 1709 | 1712 | 1715 | 1716 | 9 |
| 1709 | 1712 | 1715 | 1717 | 9 |
| 1709 | 1712 | 1715 | 1718 | 9 |
| 1713 | 1712 | 1715 | 1716 | 9 |
| 1713 | 1712 | 1715 | 1717 | 9 |
| 1713 | 1712 | 1715 | 1718 | 9 |
| 1714 | 1712 | 1715 | 1716 | 9 |
| 1714 | 1712 | 1715 | 1717 | 9 |
| 1714 | 1712 | 1715 | 1718 | 9 |
| 1712 | 1715 | 1718 | 1719 | 9 |
| 1712 | 1715 | 1718 | 1723 | 9 |
| 1712 | 1715 | 1718 | 1727 | 9 |
| 1716 | 1715 | 1718 | 1719 | 9 |
| 1716 | 1715 | 1718 | 1723 | 9 |
| 1716 | 1715 | 1718 | 1727 | 9 |
| 1717 | 1715 | 1718 | 1719 | 9 |
| 1717 | 1715 | 1718 | 1723 | 9 |
| 1717 | 1715 | 1718 | 1727 | 9 |
| 1715 | 1718 | 1719 | 1720 | 9 |
| 1715 | 1718 | 1719 | 1721 | 9 |

|      |      |      |      |   |
|------|------|------|------|---|
| 1715 | 1718 | 1719 | 1722 | 9 |
| 1723 | 1718 | 1719 | 1720 | 9 |
| 1723 | 1718 | 1719 | 1721 | 9 |
| 1723 | 1718 | 1719 | 1722 | 9 |
| 1727 | 1718 | 1719 | 1720 | 9 |
| 1727 | 1718 | 1719 | 1721 | 9 |
| 1727 | 1718 | 1719 | 1722 | 9 |
| 1715 | 1718 | 1723 | 1724 | 9 |
| 1715 | 1718 | 1723 | 1725 | 9 |
| 1715 | 1718 | 1723 | 1726 | 9 |
| 1719 | 1718 | 1723 | 1724 | 9 |
| 1719 | 1718 | 1723 | 1725 | 9 |
| 1719 | 1718 | 1723 | 1726 | 9 |
| 1727 | 1718 | 1723 | 1724 | 9 |
| 1727 | 1718 | 1723 | 1725 | 9 |
| 1727 | 1718 | 1723 | 1726 | 9 |
| 1715 | 1718 | 1727 | 1728 | 9 |
| 1715 | 1718 | 1727 | 1729 | 9 |
| 1715 | 1718 | 1727 | 1730 | 9 |
| 1719 | 1718 | 1727 | 1728 | 9 |
| 1719 | 1718 | 1727 | 1729 | 9 |
| 1719 | 1718 | 1727 | 1730 | 9 |
| 1723 | 1718 | 1727 | 1728 | 9 |
| 1723 | 1718 | 1727 | 1729 | 9 |
| 1723 | 1718 | 1727 | 1730 | 9 |
| 1703 | 1731 | 1733 | 1734 | 9 |
| 1703 | 1731 | 1733 | 1735 | 9 |
| 1732 | 1731 | 1733 | 1734 | 9 |
| 1732 | 1731 | 1733 | 1735 | 9 |
| 1736 | 1731 | 1733 | 1734 | 9 |
| 1736 | 1731 | 1733 | 1735 | 9 |
| 1703 | 1731 | 1736 | 1737 | 9 |
| 1703 | 1731 | 1736 | 1738 | 9 |
| 1703 | 1731 | 1736 | 1739 | 9 |
| 1732 | 1731 | 1736 | 1737 | 9 |
| 1732 | 1731 | 1736 | 1738 | 9 |
| 1732 | 1731 | 1736 | 1739 | 9 |
| 1733 | 1731 | 1736 | 1737 | 9 |
| 1733 | 1731 | 1736 | 1738 | 9 |
| 1733 | 1731 | 1736 | 1739 | 9 |
| 1731 | 1736 | 1739 | 1740 | 9 |
| 1731 | 1736 | 1739 | 1741 | 9 |
| 1731 | 1736 | 1739 | 1766 | 9 |
| 1737 | 1736 | 1739 | 1740 | 9 |
| 1737 | 1736 | 1739 | 1741 | 9 |
| 1737 | 1736 | 1739 | 1766 | 9 |
| 1738 | 1736 | 1739 | 1740 | 9 |
| 1738 | 1736 | 1739 | 1741 | 9 |
| 1738 | 1736 | 1739 | 1766 | 9 |
| 1736 | 1739 | 1741 | 1742 | 9 |
| 1736 | 1739 | 1741 | 1743 | 9 |
| 1736 | 1739 | 1741 | 1744 | 9 |
| 1740 | 1739 | 1741 | 1742 | 9 |
| 1740 | 1739 | 1741 | 1743 | 9 |

|      |      |      |      |   |
|------|------|------|------|---|
| 1740 | 1739 | 1741 | 1744 | 9 |
| 1766 | 1739 | 1741 | 1742 | 9 |
| 1766 | 1739 | 1741 | 1743 | 9 |
| 1766 | 1739 | 1741 | 1744 | 9 |
| 1736 | 1739 | 1766 | 1767 | 9 |
| 1736 | 1739 | 1766 | 1768 | 9 |
| 1736 | 1739 | 1766 | 1794 | 9 |
| 1740 | 1739 | 1766 | 1767 | 9 |
| 1740 | 1739 | 1766 | 1768 | 9 |
| 1740 | 1739 | 1766 | 1794 | 9 |
| 1741 | 1739 | 1766 | 1767 | 9 |
| 1741 | 1739 | 1766 | 1768 | 9 |
| 1741 | 1739 | 1766 | 1794 | 9 |
| 1739 | 1741 | 1744 | 1745 | 9 |
| 1739 | 1741 | 1744 | 1746 | 9 |
| 1739 | 1741 | 1744 | 1747 | 9 |
| 1742 | 1741 | 1744 | 1745 | 9 |
| 1742 | 1741 | 1744 | 1746 | 9 |
| 1742 | 1741 | 1744 | 1747 | 9 |
| 1743 | 1741 | 1744 | 1745 | 9 |
| 1743 | 1741 | 1744 | 1746 | 9 |
| 1743 | 1741 | 1744 | 1747 | 9 |
| 1741 | 1744 | 1747 | 1748 | 9 |
| 1741 | 1744 | 1747 | 1749 | 9 |
| 1741 | 1744 | 1747 | 1750 | 9 |
| 1745 | 1744 | 1747 | 1748 | 9 |
| 1745 | 1744 | 1747 | 1749 | 9 |
| 1745 | 1744 | 1747 | 1750 | 9 |
| 1746 | 1744 | 1747 | 1748 | 9 |
| 1746 | 1744 | 1747 | 1749 | 9 |
| 1746 | 1744 | 1747 | 1750 | 9 |
| 1744 | 1747 | 1750 | 1751 | 9 |
| 1744 | 1747 | 1750 | 1752 | 9 |
| 1744 | 1747 | 1750 | 1753 | 9 |
| 1748 | 1747 | 1750 | 1751 | 9 |
| 1748 | 1747 | 1750 | 1752 | 9 |
| 1748 | 1747 | 1750 | 1753 | 9 |
| 1749 | 1747 | 1750 | 1751 | 9 |
| 1749 | 1747 | 1750 | 1752 | 9 |
| 1749 | 1747 | 1750 | 1753 | 9 |
| 1747 | 1750 | 1753 | 1754 | 9 |
| 1747 | 1750 | 1753 | 1755 | 9 |
| 1747 | 1750 | 1753 | 1756 | 9 |
| 1751 | 1750 | 1753 | 1754 | 9 |
| 1751 | 1750 | 1753 | 1755 | 9 |
| 1751 | 1750 | 1753 | 1756 | 9 |
| 1752 | 1750 | 1753 | 1754 | 9 |
| 1752 | 1750 | 1753 | 1755 | 9 |
| 1752 | 1750 | 1753 | 1756 | 9 |
| 1750 | 1753 | 1756 | 1757 | 9 |
| 1750 | 1753 | 1756 | 1758 | 9 |
| 1750 | 1753 | 1756 | 1759 | 9 |
| 1754 | 1753 | 1756 | 1757 | 9 |
| 1754 | 1753 | 1756 | 1758 | 9 |

|      |      |      |      |   |
|------|------|------|------|---|
| 1754 | 1753 | 1756 | 1759 | 9 |
| 1755 | 1753 | 1756 | 1757 | 9 |
| 1755 | 1753 | 1756 | 1758 | 9 |
| 1755 | 1753 | 1756 | 1759 | 9 |
| 1753 | 1756 | 1759 | 1760 | 9 |
| 1753 | 1756 | 1759 | 1761 | 9 |
| 1753 | 1756 | 1759 | 1762 | 9 |
| 1757 | 1756 | 1759 | 1760 | 9 |
| 1757 | 1756 | 1759 | 1761 | 9 |
| 1757 | 1756 | 1759 | 1762 | 9 |
| 1758 | 1756 | 1759 | 1760 | 9 |
| 1758 | 1756 | 1759 | 1761 | 9 |
| 1758 | 1756 | 1759 | 1762 | 9 |
| 1756 | 1759 | 1762 | 1763 | 9 |
| 1756 | 1759 | 1762 | 1764 | 9 |
| 1756 | 1759 | 1762 | 1765 | 9 |
| 1760 | 1759 | 1762 | 1763 | 9 |
| 1760 | 1759 | 1762 | 1764 | 9 |
| 1760 | 1759 | 1762 | 1765 | 9 |
| 1761 | 1759 | 1762 | 1763 | 9 |
| 1761 | 1759 | 1762 | 1764 | 9 |
| 1761 | 1759 | 1762 | 1765 | 9 |
| 1739 | 1766 | 1768 | 1769 | 9 |
| 1739 | 1766 | 1768 | 1770 | 9 |
| 1767 | 1766 | 1768 | 1769 | 9 |
| 1767 | 1766 | 1768 | 1770 | 9 |
| 1794 | 1766 | 1768 | 1769 | 9 |
| 1794 | 1766 | 1768 | 1770 | 9 |
| 1739 | 1766 | 1794 | 1795 | 9 |
| 1739 | 1766 | 1794 | 1796 | 9 |
| 1739 | 1766 | 1794 | 1799 | 9 |
| 1767 | 1766 | 1794 | 1795 | 9 |
| 1767 | 1766 | 1794 | 1796 | 9 |
| 1767 | 1766 | 1794 | 1799 | 9 |
| 1768 | 1766 | 1794 | 1795 | 9 |
| 1768 | 1766 | 1794 | 1796 | 9 |
| 1768 | 1766 | 1794 | 1799 | 9 |
| 1766 | 1768 | 1770 | 1771 | 9 |
| 1766 | 1768 | 1770 | 1772 | 9 |
| 1769 | 1768 | 1770 | 1771 | 9 |
| 1769 | 1768 | 1770 | 1772 | 9 |
| 1768 | 1770 | 1772 | 1773 | 9 |
| 1768 | 1770 | 1772 | 1774 | 9 |
| 1768 | 1770 | 1772 | 1775 | 9 |
| 1771 | 1770 | 1772 | 1773 | 9 |
| 1771 | 1770 | 1772 | 1774 | 9 |
| 1771 | 1770 | 1772 | 1775 | 9 |
| 1770 | 1772 | 1775 | 1776 | 9 |
| 1770 | 1772 | 1775 | 1777 | 9 |
| 1770 | 1772 | 1775 | 1778 | 9 |
| 1773 | 1772 | 1775 | 1776 | 9 |
| 1773 | 1772 | 1775 | 1777 | 9 |
| 1773 | 1772 | 1775 | 1778 | 9 |
| 1774 | 1772 | 1775 | 1776 | 9 |

|      |      |      |      |   |
|------|------|------|------|---|
| 1774 | 1772 | 1775 | 1777 | 9 |
| 1774 | 1772 | 1775 | 1778 | 9 |
| 1772 | 1775 | 1778 | 1779 | 9 |
| 1772 | 1775 | 1778 | 1780 | 9 |
| 1772 | 1775 | 1778 | 1781 | 9 |
| 1776 | 1775 | 1778 | 1779 | 9 |
| 1776 | 1775 | 1778 | 1780 | 9 |
| 1776 | 1775 | 1778 | 1781 | 9 |
| 1777 | 1775 | 1778 | 1779 | 9 |
| 1777 | 1775 | 1778 | 1780 | 9 |
| 1777 | 1775 | 1778 | 1781 | 9 |
| 1775 | 1778 | 1781 | 1782 | 9 |
| 1775 | 1778 | 1781 | 1786 | 9 |
| 1775 | 1778 | 1781 | 1790 | 9 |
| 1779 | 1778 | 1781 | 1782 | 9 |
| 1779 | 1778 | 1781 | 1786 | 9 |
| 1779 | 1778 | 1781 | 1790 | 9 |
| 1780 | 1778 | 1781 | 1782 | 9 |
| 1780 | 1778 | 1781 | 1786 | 9 |
| 1780 | 1778 | 1781 | 1790 | 9 |
| 1778 | 1781 | 1782 | 1783 | 9 |
| 1778 | 1781 | 1782 | 1784 | 9 |
| 1778 | 1781 | 1782 | 1785 | 9 |
| 1786 | 1781 | 1782 | 1783 | 9 |
| 1786 | 1781 | 1782 | 1784 | 9 |
| 1786 | 1781 | 1782 | 1785 | 9 |
| 1790 | 1781 | 1782 | 1783 | 9 |
| 1790 | 1781 | 1782 | 1784 | 9 |
| 1790 | 1781 | 1782 | 1785 | 9 |
| 1778 | 1781 | 1786 | 1787 | 9 |
| 1778 | 1781 | 1786 | 1788 | 9 |
| 1778 | 1781 | 1786 | 1789 | 9 |
| 1782 | 1781 | 1786 | 1787 | 9 |
| 1782 | 1781 | 1786 | 1788 | 9 |
| 1782 | 1781 | 1786 | 1789 | 9 |
| 1790 | 1781 | 1786 | 1787 | 9 |
| 1790 | 1781 | 1786 | 1788 | 9 |
| 1790 | 1781 | 1786 | 1789 | 9 |
| 1778 | 1781 | 1790 | 1791 | 9 |
| 1778 | 1781 | 1790 | 1792 | 9 |
| 1778 | 1781 | 1790 | 1793 | 9 |
| 1782 | 1781 | 1790 | 1791 | 9 |
| 1782 | 1781 | 1790 | 1792 | 9 |
| 1782 | 1781 | 1790 | 1793 | 9 |
| 1786 | 1781 | 1790 | 1791 | 9 |
| 1786 | 1781 | 1790 | 1792 | 9 |
| 1786 | 1781 | 1790 | 1793 | 9 |
| 1766 | 1794 | 1796 | 1797 | 9 |
| 1766 | 1794 | 1796 | 1798 | 9 |
| 1795 | 1794 | 1796 | 1797 | 9 |
| 1795 | 1794 | 1796 | 1798 | 9 |
| 1799 | 1794 | 1796 | 1797 | 9 |
| 1799 | 1794 | 1796 | 1798 | 9 |
| 1766 | 1794 | 1799 | 1800 | 9 |



|      |      |      |      |   |
|------|------|------|------|---|
| 1766 | 1794 | 1799 | 1801 | 9 |
| 1766 | 1794 | 1799 | 1802 | 9 |
| 1795 | 1794 | 1799 | 1800 | 9 |
| 1795 | 1794 | 1799 | 1801 | 9 |
| 1795 | 1794 | 1799 | 1802 | 9 |
| 1796 | 1794 | 1799 | 1800 | 9 |
| 1796 | 1794 | 1799 | 1801 | 9 |
| 1796 | 1794 | 1799 | 1802 | 9 |
| 1794 | 1799 | 1802 | 1803 | 9 |
| 1794 | 1799 | 1802 | 1804 | 9 |
| 1794 | 1799 | 1802 | 1829 | 9 |
| 1800 | 1799 | 1802 | 1803 | 9 |
| 1800 | 1799 | 1802 | 1804 | 9 |
| 1800 | 1799 | 1802 | 1829 | 9 |
| 1801 | 1799 | 1802 | 1803 | 9 |
| 1801 | 1799 | 1802 | 1804 | 9 |
| 1801 | 1799 | 1802 | 1829 | 9 |
| 1799 | 1802 | 1804 | 1805 | 9 |
| 1799 | 1802 | 1804 | 1806 | 9 |
| 1799 | 1802 | 1804 | 1807 | 9 |
| 1803 | 1802 | 1804 | 1805 | 9 |
| 1803 | 1802 | 1804 | 1806 | 9 |
| 1803 | 1802 | 1804 | 1807 | 9 |
| 1829 | 1802 | 1804 | 1805 | 9 |
| 1829 | 1802 | 1804 | 1806 | 9 |
| 1829 | 1802 | 1804 | 1807 | 9 |
| 1799 | 1802 | 1829 | 1830 | 9 |
| 1799 | 1802 | 1829 | 1831 | 9 |
| 1799 | 1802 | 1829 | 1857 | 9 |
| 1803 | 1802 | 1829 | 1830 | 9 |
| 1803 | 1802 | 1829 | 1831 | 9 |
| 1803 | 1802 | 1829 | 1857 | 9 |
| 1804 | 1802 | 1829 | 1830 | 9 |
| 1804 | 1802 | 1829 | 1831 | 9 |
| 1804 | 1802 | 1829 | 1857 | 9 |
| 1802 | 1804 | 1807 | 1808 | 9 |
| 1802 | 1804 | 1807 | 1809 | 9 |
| 1802 | 1804 | 1807 | 1810 | 9 |
| 1805 | 1804 | 1807 | 1808 | 9 |
| 1805 | 1804 | 1807 | 1809 | 9 |
| 1805 | 1804 | 1807 | 1810 | 9 |
| 1806 | 1804 | 1807 | 1808 | 9 |
| 1806 | 1804 | 1807 | 1809 | 9 |
| 1806 | 1804 | 1807 | 1810 | 9 |
| 1804 | 1807 | 1810 | 1811 | 9 |
| 1804 | 1807 | 1810 | 1812 | 9 |
| 1804 | 1807 | 1810 | 1813 | 9 |
| 1808 | 1807 | 1810 | 1811 | 9 |
| 1808 | 1807 | 1810 | 1812 | 9 |
| 1808 | 1807 | 1810 | 1813 | 9 |
| 1809 | 1807 | 1810 | 1811 | 9 |
| 1809 | 1807 | 1810 | 1812 | 9 |
| 1809 | 1807 | 1810 | 1813 | 9 |
| 1807 | 1810 | 1813 | 1814 | 9 |

|      |      |      |      |   |
|------|------|------|------|---|
| 1807 | 1810 | 1813 | 1815 | 9 |
| 1807 | 1810 | 1813 | 1816 | 9 |
| 1811 | 1810 | 1813 | 1814 | 9 |
| 1811 | 1810 | 1813 | 1815 | 9 |
| 1811 | 1810 | 1813 | 1816 | 9 |
| 1812 | 1810 | 1813 | 1814 | 9 |
| 1812 | 1810 | 1813 | 1815 | 9 |
| 1812 | 1810 | 1813 | 1816 | 9 |
| 1810 | 1813 | 1816 | 1817 | 9 |
| 1810 | 1813 | 1816 | 1818 | 9 |
| 1810 | 1813 | 1816 | 1819 | 9 |
| 1814 | 1813 | 1816 | 1817 | 9 |
| 1814 | 1813 | 1816 | 1818 | 9 |
| 1814 | 1813 | 1816 | 1819 | 9 |
| 1815 | 1813 | 1816 | 1817 | 9 |
| 1815 | 1813 | 1816 | 1818 | 9 |
| 1815 | 1813 | 1816 | 1819 | 9 |
| 1813 | 1816 | 1819 | 1820 | 9 |
| 1813 | 1816 | 1819 | 1821 | 9 |
| 1813 | 1816 | 1819 | 1822 | 9 |
| 1817 | 1816 | 1819 | 1820 | 9 |
| 1817 | 1816 | 1819 | 1821 | 9 |
| 1817 | 1816 | 1819 | 1822 | 9 |
| 1818 | 1816 | 1819 | 1820 | 9 |
| 1818 | 1816 | 1819 | 1821 | 9 |
| 1818 | 1816 | 1819 | 1822 | 9 |
| 1816 | 1819 | 1822 | 1823 | 9 |
| 1816 | 1819 | 1822 | 1824 | 9 |
| 1816 | 1819 | 1822 | 1825 | 9 |
| 1820 | 1819 | 1822 | 1823 | 9 |
| 1820 | 1819 | 1822 | 1824 | 9 |
| 1820 | 1819 | 1822 | 1825 | 9 |
| 1821 | 1819 | 1822 | 1823 | 9 |
| 1821 | 1819 | 1822 | 1824 | 9 |
| 1821 | 1819 | 1822 | 1825 | 9 |
| 1819 | 1822 | 1825 | 1826 | 9 |
| 1819 | 1822 | 1825 | 1827 | 9 |
| 1819 | 1822 | 1825 | 1828 | 9 |
| 1823 | 1822 | 1825 | 1826 | 9 |
| 1823 | 1822 | 1825 | 1827 | 9 |
| 1823 | 1822 | 1825 | 1828 | 9 |
| 1824 | 1822 | 1825 | 1826 | 9 |
| 1824 | 1822 | 1825 | 1827 | 9 |
| 1824 | 1822 | 1825 | 1828 | 9 |
| 1802 | 1829 | 1831 | 1832 | 9 |
| 1802 | 1829 | 1831 | 1833 | 9 |
| 1830 | 1829 | 1831 | 1832 | 9 |
| 1830 | 1829 | 1831 | 1833 | 9 |
| 1857 | 1829 | 1831 | 1832 | 9 |
| 1857 | 1829 | 1831 | 1833 | 9 |
| 1802 | 1829 | 1857 | 1858 | 9 |
| 1802 | 1829 | 1857 | 1859 | 9 |
| 1802 | 1829 | 1857 | 1862 | 9 |
| 1830 | 1829 | 1857 | 1858 | 9 |

|      |      |      |      |   |
|------|------|------|------|---|
| 1830 | 1829 | 1857 | 1859 | 9 |
| 1830 | 1829 | 1857 | 1862 | 9 |
| 1831 | 1829 | 1857 | 1858 | 9 |
| 1831 | 1829 | 1857 | 1859 | 9 |
| 1831 | 1829 | 1857 | 1862 | 9 |
| 1829 | 1831 | 1833 | 1834 | 9 |
| 1829 | 1831 | 1833 | 1835 | 9 |
| 1832 | 1831 | 1833 | 1834 | 9 |
| 1832 | 1831 | 1833 | 1835 | 9 |
| 1831 | 1833 | 1835 | 1836 | 9 |
| 1831 | 1833 | 1835 | 1837 | 9 |
| 1831 | 1833 | 1835 | 1838 | 9 |
| 1834 | 1833 | 1835 | 1836 | 9 |
| 1834 | 1833 | 1835 | 1837 | 9 |
| 1834 | 1833 | 1835 | 1838 | 9 |
| 1833 | 1835 | 1838 | 1839 | 9 |
| 1833 | 1835 | 1838 | 1840 | 9 |
| 1833 | 1835 | 1838 | 1841 | 9 |
| 1836 | 1835 | 1838 | 1839 | 9 |
| 1836 | 1835 | 1838 | 1840 | 9 |
| 1836 | 1835 | 1838 | 1841 | 9 |
| 1837 | 1835 | 1838 | 1839 | 9 |
| 1837 | 1835 | 1838 | 1840 | 9 |
| 1837 | 1835 | 1838 | 1841 | 9 |
| 1835 | 1838 | 1841 | 1842 | 9 |
| 1835 | 1838 | 1841 | 1843 | 9 |
| 1835 | 1838 | 1841 | 1844 | 9 |
| 1839 | 1838 | 1841 | 1842 | 9 |
| 1839 | 1838 | 1841 | 1843 | 9 |
| 1839 | 1838 | 1841 | 1844 | 9 |
| 1840 | 1838 | 1841 | 1842 | 9 |
| 1840 | 1838 | 1841 | 1843 | 9 |
| 1840 | 1838 | 1841 | 1844 | 9 |
| 1838 | 1841 | 1844 | 1845 | 9 |
| 1838 | 1841 | 1844 | 1849 | 9 |
| 1838 | 1841 | 1844 | 1853 | 9 |
| 1842 | 1841 | 1844 | 1845 | 9 |
| 1842 | 1841 | 1844 | 1849 | 9 |
| 1842 | 1841 | 1844 | 1853 | 9 |
| 1843 | 1841 | 1844 | 1845 | 9 |
| 1843 | 1841 | 1844 | 1849 | 9 |
| 1843 | 1841 | 1844 | 1853 | 9 |
| 1841 | 1844 | 1845 | 1846 | 9 |
| 1841 | 1844 | 1845 | 1847 | 9 |
| 1841 | 1844 | 1845 | 1848 | 9 |
| 1849 | 1844 | 1845 | 1846 | 9 |
| 1849 | 1844 | 1845 | 1847 | 9 |
| 1849 | 1844 | 1845 | 1848 | 9 |
| 1853 | 1844 | 1845 | 1846 | 9 |
| 1853 | 1844 | 1845 | 1847 | 9 |
| 1853 | 1844 | 1845 | 1848 | 9 |
| 1841 | 1844 | 1849 | 1850 | 9 |
| 1841 | 1844 | 1849 | 1851 | 9 |
| 1841 | 1844 | 1849 | 1852 | 9 |

|      |      |      |      |   |
|------|------|------|------|---|
| 1845 | 1844 | 1849 | 1850 | 9 |
| 1845 | 1844 | 1849 | 1851 | 9 |
| 1845 | 1844 | 1849 | 1852 | 9 |
| 1853 | 1844 | 1849 | 1850 | 9 |
| 1853 | 1844 | 1849 | 1851 | 9 |
| 1853 | 1844 | 1849 | 1852 | 9 |
| 1841 | 1844 | 1853 | 1854 | 9 |
| 1841 | 1844 | 1853 | 1855 | 9 |
| 1841 | 1844 | 1853 | 1856 | 9 |
| 1845 | 1844 | 1853 | 1854 | 9 |
| 1845 | 1844 | 1853 | 1855 | 9 |
| 1845 | 1844 | 1853 | 1856 | 9 |
| 1849 | 1844 | 1853 | 1854 | 9 |
| 1849 | 1844 | 1853 | 1855 | 9 |
| 1849 | 1844 | 1853 | 1856 | 9 |
| 1829 | 1857 | 1859 | 1860 | 9 |
| 1829 | 1857 | 1859 | 1861 | 9 |
| 1858 | 1857 | 1859 | 1860 | 9 |
| 1858 | 1857 | 1859 | 1861 | 9 |
| 1862 | 1857 | 1859 | 1860 | 9 |
| 1862 | 1857 | 1859 | 1861 | 9 |
| 1829 | 1857 | 1862 | 1863 | 9 |
| 1829 | 1857 | 1862 | 1864 | 9 |
| 1829 | 1857 | 1862 | 1865 | 9 |
| 1858 | 1857 | 1862 | 1863 | 9 |
| 1858 | 1857 | 1862 | 1864 | 9 |
| 1858 | 1857 | 1862 | 1865 | 9 |
| 1859 | 1857 | 1862 | 1863 | 9 |
| 1859 | 1857 | 1862 | 1864 | 9 |
| 1859 | 1857 | 1862 | 1865 | 9 |
| 1857 | 1862 | 1865 | 1866 | 9 |
| 1857 | 1862 | 1865 | 1867 | 9 |
| 1857 | 1862 | 1865 | 1892 | 9 |
| 1863 | 1862 | 1865 | 1866 | 9 |
| 1863 | 1862 | 1865 | 1867 | 9 |
| 1863 | 1862 | 1865 | 1892 | 9 |
| 1864 | 1862 | 1865 | 1866 | 9 |
| 1864 | 1862 | 1865 | 1867 | 9 |
| 1864 | 1862 | 1865 | 1892 | 9 |
| 1862 | 1865 | 1867 | 1868 | 9 |
| 1862 | 1865 | 1867 | 1869 | 9 |
| 1862 | 1865 | 1867 | 1870 | 9 |
| 1866 | 1865 | 1867 | 1868 | 9 |
| 1866 | 1865 | 1867 | 1869 | 9 |
| 1866 | 1865 | 1867 | 1870 | 9 |
| 1892 | 1865 | 1867 | 1868 | 9 |
| 1892 | 1865 | 1867 | 1869 | 9 |
| 1892 | 1865 | 1867 | 1870 | 9 |
| 1862 | 1865 | 1892 | 1893 | 9 |
| 1862 | 1865 | 1892 | 1894 | 9 |
| 1862 | 1865 | 1892 | 1920 | 9 |
| 1866 | 1865 | 1892 | 1893 | 9 |
| 1866 | 1865 | 1892 | 1894 | 9 |
| 1866 | 1865 | 1892 | 1920 | 9 |

|      |      |      |      |   |
|------|------|------|------|---|
| 1867 | 1865 | 1892 | 1893 | 9 |
| 1867 | 1865 | 1892 | 1894 | 9 |
| 1867 | 1865 | 1892 | 1920 | 9 |
| 1865 | 1867 | 1870 | 1871 | 9 |
| 1865 | 1867 | 1870 | 1872 | 9 |
| 1865 | 1867 | 1870 | 1873 | 9 |
| 1868 | 1867 | 1870 | 1871 | 9 |
| 1868 | 1867 | 1870 | 1872 | 9 |
| 1868 | 1867 | 1870 | 1873 | 9 |
| 1869 | 1867 | 1870 | 1871 | 9 |
| 1869 | 1867 | 1870 | 1872 | 9 |
| 1869 | 1867 | 1870 | 1873 | 9 |
| 1867 | 1870 | 1873 | 1874 | 9 |
| 1867 | 1870 | 1873 | 1875 | 9 |
| 1867 | 1870 | 1873 | 1876 | 9 |
| 1871 | 1870 | 1873 | 1874 | 9 |
| 1871 | 1870 | 1873 | 1875 | 9 |
| 1871 | 1870 | 1873 | 1876 | 9 |
| 1872 | 1870 | 1873 | 1874 | 9 |
| 1872 | 1870 | 1873 | 1875 | 9 |
| 1872 | 1870 | 1873 | 1876 | 9 |
| 1870 | 1873 | 1876 | 1877 | 9 |
| 1870 | 1873 | 1876 | 1878 | 9 |
| 1870 | 1873 | 1876 | 1879 | 9 |
| 1874 | 1873 | 1876 | 1877 | 9 |
| 1874 | 1873 | 1876 | 1878 | 9 |
| 1874 | 1873 | 1876 | 1879 | 9 |
| 1875 | 1873 | 1876 | 1877 | 9 |
| 1875 | 1873 | 1876 | 1878 | 9 |
| 1875 | 1873 | 1876 | 1879 | 9 |
| 1873 | 1876 | 1879 | 1880 | 9 |
| 1873 | 1876 | 1879 | 1881 | 9 |
| 1873 | 1876 | 1879 | 1882 | 9 |
| 1877 | 1876 | 1879 | 1880 | 9 |
| 1877 | 1876 | 1879 | 1881 | 9 |
| 1877 | 1876 | 1879 | 1882 | 9 |
| 1878 | 1876 | 1879 | 1880 | 9 |
| 1878 | 1876 | 1879 | 1881 | 9 |
| 1878 | 1876 | 1879 | 1882 | 9 |
| 1876 | 1879 | 1882 | 1883 | 9 |
| 1876 | 1879 | 1882 | 1884 | 9 |
| 1876 | 1879 | 1882 | 1885 | 9 |
| 1880 | 1879 | 1882 | 1883 | 9 |
| 1880 | 1879 | 1882 | 1884 | 9 |
| 1880 | 1879 | 1882 | 1885 | 9 |
| 1881 | 1879 | 1882 | 1883 | 9 |
| 1881 | 1879 | 1882 | 1884 | 9 |
| 1881 | 1879 | 1882 | 1885 | 9 |
| 1879 | 1882 | 1885 | 1886 | 9 |
| 1879 | 1882 | 1885 | 1887 | 9 |
| 1879 | 1882 | 1885 | 1888 | 9 |
| 1883 | 1882 | 1885 | 1886 | 9 |
| 1883 | 1882 | 1885 | 1887 | 9 |
| 1883 | 1882 | 1885 | 1888 | 9 |

|      |      |      |      |   |
|------|------|------|------|---|
| 1884 | 1882 | 1885 | 1886 | 9 |
| 1884 | 1882 | 1885 | 1887 | 9 |
| 1884 | 1882 | 1885 | 1888 | 9 |
| 1882 | 1885 | 1888 | 1889 | 9 |
| 1882 | 1885 | 1888 | 1890 | 9 |
| 1882 | 1885 | 1888 | 1891 | 9 |
| 1886 | 1885 | 1888 | 1889 | 9 |
| 1886 | 1885 | 1888 | 1890 | 9 |
| 1886 | 1885 | 1888 | 1891 | 9 |
| 1887 | 1885 | 1888 | 1889 | 9 |
| 1887 | 1885 | 1888 | 1890 | 9 |
| 1887 | 1885 | 1888 | 1891 | 9 |
| 1865 | 1892 | 1894 | 1895 | 9 |
| 1865 | 1892 | 1894 | 1896 | 9 |
| 1893 | 1892 | 1894 | 1895 | 9 |
| 1893 | 1892 | 1894 | 1896 | 9 |
| 1920 | 1892 | 1894 | 1895 | 9 |
| 1920 | 1892 | 1894 | 1896 | 9 |
| 1865 | 1892 | 1920 | 1921 | 9 |
| 1865 | 1892 | 1920 | 1922 | 9 |
| 1865 | 1892 | 1920 | 1925 | 9 |
| 1893 | 1892 | 1920 | 1921 | 9 |
| 1893 | 1892 | 1920 | 1922 | 9 |
| 1893 | 1892 | 1920 | 1925 | 9 |
| 1894 | 1892 | 1920 | 1921 | 9 |
| 1894 | 1892 | 1920 | 1922 | 9 |
| 1894 | 1892 | 1920 | 1925 | 9 |
| 1892 | 1894 | 1896 | 1897 | 9 |
| 1892 | 1894 | 1896 | 1898 | 9 |
| 1895 | 1894 | 1896 | 1897 | 9 |
| 1895 | 1894 | 1896 | 1898 | 9 |
| 1894 | 1896 | 1898 | 1899 | 9 |
| 1894 | 1896 | 1898 | 1900 | 9 |
| 1894 | 1896 | 1898 | 1901 | 9 |
| 1897 | 1896 | 1898 | 1899 | 9 |
| 1897 | 1896 | 1898 | 1900 | 9 |
| 1897 | 1896 | 1898 | 1901 | 9 |
| 1896 | 1898 | 1901 | 1902 | 9 |
| 1896 | 1898 | 1901 | 1903 | 9 |
| 1896 | 1898 | 1901 | 1904 | 9 |
| 1899 | 1898 | 1901 | 1902 | 9 |
| 1899 | 1898 | 1901 | 1903 | 9 |
| 1899 | 1898 | 1901 | 1904 | 9 |
| 1900 | 1898 | 1901 | 1902 | 9 |
| 1900 | 1898 | 1901 | 1903 | 9 |
| 1900 | 1898 | 1901 | 1904 | 9 |
| 1898 | 1901 | 1904 | 1905 | 9 |
| 1898 | 1901 | 1904 | 1906 | 9 |
| 1898 | 1901 | 1904 | 1907 | 9 |
| 1902 | 1901 | 1904 | 1905 | 9 |
| 1902 | 1901 | 1904 | 1906 | 9 |
| 1902 | 1901 | 1904 | 1907 | 9 |
| 1903 | 1901 | 1904 | 1905 | 9 |
| 1903 | 1901 | 1904 | 1906 | 9 |

|      |      |      |      |   |
|------|------|------|------|---|
| 1903 | 1901 | 1904 | 1907 | 9 |
| 1901 | 1904 | 1907 | 1908 | 9 |
| 1901 | 1904 | 1907 | 1912 | 9 |
| 1901 | 1904 | 1907 | 1916 | 9 |
| 1905 | 1904 | 1907 | 1908 | 9 |
| 1905 | 1904 | 1907 | 1912 | 9 |
| 1905 | 1904 | 1907 | 1916 | 9 |
| 1906 | 1904 | 1907 | 1908 | 9 |
| 1906 | 1904 | 1907 | 1912 | 9 |
| 1906 | 1904 | 1907 | 1916 | 9 |
| 1904 | 1907 | 1908 | 1909 | 9 |
| 1904 | 1907 | 1908 | 1910 | 9 |
| 1904 | 1907 | 1908 | 1911 | 9 |
| 1912 | 1907 | 1908 | 1909 | 9 |
| 1912 | 1907 | 1908 | 1910 | 9 |
| 1912 | 1907 | 1908 | 1911 | 9 |
| 1916 | 1907 | 1908 | 1909 | 9 |
| 1916 | 1907 | 1908 | 1910 | 9 |
| 1916 | 1907 | 1908 | 1911 | 9 |
| 1904 | 1907 | 1912 | 1913 | 9 |
| 1904 | 1907 | 1912 | 1914 | 9 |
| 1904 | 1907 | 1912 | 1915 | 9 |
| 1908 | 1907 | 1912 | 1913 | 9 |
| 1908 | 1907 | 1912 | 1914 | 9 |
| 1908 | 1907 | 1912 | 1915 | 9 |
| 1916 | 1907 | 1912 | 1913 | 9 |
| 1916 | 1907 | 1912 | 1914 | 9 |
| 1916 | 1907 | 1912 | 1915 | 9 |
| 1904 | 1907 | 1916 | 1917 | 9 |
| 1904 | 1907 | 1916 | 1918 | 9 |
| 1904 | 1907 | 1916 | 1919 | 9 |
| 1908 | 1907 | 1916 | 1917 | 9 |
| 1908 | 1907 | 1916 | 1918 | 9 |
| 1908 | 1907 | 1916 | 1919 | 9 |
| 1912 | 1907 | 1916 | 1917 | 9 |
| 1912 | 1907 | 1916 | 1918 | 9 |
| 1912 | 1907 | 1916 | 1919 | 9 |
| 1892 | 1920 | 1922 | 1923 | 9 |
| 1892 | 1920 | 1922 | 1924 | 9 |
| 1921 | 1920 | 1922 | 1923 | 9 |
| 1921 | 1920 | 1922 | 1924 | 9 |
| 1925 | 1920 | 1922 | 1923 | 9 |
| 1925 | 1920 | 1922 | 1924 | 9 |
| 1892 | 1920 | 1925 | 1926 | 9 |
| 1892 | 1920 | 1925 | 1927 | 9 |
| 1892 | 1920 | 1925 | 1928 | 9 |
| 1921 | 1920 | 1925 | 1926 | 9 |
| 1921 | 1920 | 1925 | 1927 | 9 |
| 1921 | 1920 | 1925 | 1928 | 9 |
| 1922 | 1920 | 1925 | 1926 | 9 |
| 1922 | 1920 | 1925 | 1927 | 9 |
| 1922 | 1920 | 1925 | 1928 | 9 |
| 1920 | 1925 | 1928 | 1929 | 9 |
| 1920 | 1925 | 1928 | 1930 | 9 |

|      |      |      |      |   |
|------|------|------|------|---|
| 1920 | 1925 | 1928 | 1955 | 9 |
| 1926 | 1925 | 1928 | 1929 | 9 |
| 1926 | 1925 | 1928 | 1930 | 9 |
| 1926 | 1925 | 1928 | 1955 | 9 |
| 1927 | 1925 | 1928 | 1929 | 9 |
| 1927 | 1925 | 1928 | 1930 | 9 |
| 1927 | 1925 | 1928 | 1955 | 9 |
| 1925 | 1928 | 1930 | 1931 | 9 |
| 1925 | 1928 | 1930 | 1932 | 9 |
| 1925 | 1928 | 1930 | 1933 | 9 |
| 1929 | 1928 | 1930 | 1931 | 9 |
| 1929 | 1928 | 1930 | 1932 | 9 |
| 1929 | 1928 | 1930 | 1933 | 9 |
| 1955 | 1928 | 1930 | 1931 | 9 |
| 1955 | 1928 | 1930 | 1932 | 9 |
| 1955 | 1928 | 1930 | 1933 | 9 |
| 1925 | 1928 | 1955 | 1956 | 9 |
| 1925 | 1928 | 1955 | 1957 | 9 |
| 1925 | 1928 | 1955 | 1983 | 9 |
| 1929 | 1928 | 1955 | 1956 | 9 |
| 1929 | 1928 | 1955 | 1957 | 9 |
| 1929 | 1928 | 1955 | 1983 | 9 |
| 1930 | 1928 | 1955 | 1956 | 9 |
| 1930 | 1928 | 1955 | 1957 | 9 |
| 1930 | 1928 | 1955 | 1983 | 9 |
| 1928 | 1930 | 1933 | 1934 | 9 |
| 1928 | 1930 | 1933 | 1935 | 9 |
| 1928 | 1930 | 1933 | 1936 | 9 |
| 1931 | 1930 | 1933 | 1934 | 9 |
| 1931 | 1930 | 1933 | 1935 | 9 |
| 1931 | 1930 | 1933 | 1936 | 9 |
| 1932 | 1930 | 1933 | 1934 | 9 |
| 1932 | 1930 | 1933 | 1935 | 9 |
| 1932 | 1930 | 1933 | 1936 | 9 |
| 1930 | 1933 | 1936 | 1937 | 9 |
| 1930 | 1933 | 1936 | 1938 | 9 |
| 1930 | 1933 | 1936 | 1939 | 9 |
| 1934 | 1933 | 1936 | 1937 | 9 |
| 1934 | 1933 | 1936 | 1938 | 9 |
| 1934 | 1933 | 1936 | 1939 | 9 |
| 1935 | 1933 | 1936 | 1937 | 9 |
| 1935 | 1933 | 1936 | 1938 | 9 |
| 1935 | 1933 | 1936 | 1939 | 9 |
| 1933 | 1936 | 1939 | 1940 | 9 |
| 1933 | 1936 | 1939 | 1941 | 9 |
| 1933 | 1936 | 1939 | 1942 | 9 |
| 1937 | 1936 | 1939 | 1940 | 9 |
| 1937 | 1936 | 1939 | 1941 | 9 |
| 1937 | 1936 | 1939 | 1942 | 9 |
| 1938 | 1936 | 1939 | 1940 | 9 |
| 1938 | 1936 | 1939 | 1941 | 9 |
| 1938 | 1936 | 1939 | 1942 | 9 |
| 1936 | 1939 | 1942 | 1943 | 9 |
| 1936 | 1939 | 1942 | 1944 | 9 |



|      |      |      |      |   |
|------|------|------|------|---|
| 1936 | 1939 | 1942 | 1945 | 9 |
| 1940 | 1939 | 1942 | 1943 | 9 |
| 1940 | 1939 | 1942 | 1944 | 9 |
| 1940 | 1939 | 1942 | 1945 | 9 |
| 1941 | 1939 | 1942 | 1943 | 9 |
| 1941 | 1939 | 1942 | 1944 | 9 |
| 1941 | 1939 | 1942 | 1945 | 9 |
| 1939 | 1942 | 1945 | 1946 | 9 |
| 1939 | 1942 | 1945 | 1947 | 9 |
| 1939 | 1942 | 1945 | 1948 | 9 |
| 1943 | 1942 | 1945 | 1946 | 9 |
| 1943 | 1942 | 1945 | 1947 | 9 |
| 1943 | 1942 | 1945 | 1948 | 9 |
| 1944 | 1942 | 1945 | 1946 | 9 |
| 1944 | 1942 | 1945 | 1947 | 9 |
| 1944 | 1942 | 1945 | 1948 | 9 |
| 1942 | 1945 | 1948 | 1949 | 9 |
| 1942 | 1945 | 1948 | 1950 | 9 |
| 1942 | 1945 | 1948 | 1951 | 9 |
| 1946 | 1945 | 1948 | 1949 | 9 |
| 1946 | 1945 | 1948 | 1950 | 9 |
| 1946 | 1945 | 1948 | 1951 | 9 |
| 1947 | 1945 | 1948 | 1949 | 9 |
| 1947 | 1945 | 1948 | 1950 | 9 |
| 1947 | 1945 | 1948 | 1951 | 9 |
| 1945 | 1948 | 1951 | 1952 | 9 |
| 1945 | 1948 | 1951 | 1953 | 9 |
| 1945 | 1948 | 1951 | 1954 | 9 |
| 1949 | 1948 | 1951 | 1952 | 9 |
| 1949 | 1948 | 1951 | 1953 | 9 |
| 1949 | 1948 | 1951 | 1954 | 9 |
| 1950 | 1948 | 1951 | 1952 | 9 |
| 1950 | 1948 | 1951 | 1953 | 9 |
| 1950 | 1948 | 1951 | 1954 | 9 |
| 1928 | 1955 | 1957 | 1958 | 9 |
| 1928 | 1955 | 1957 | 1959 | 9 |
| 1956 | 1955 | 1957 | 1958 | 9 |
| 1956 | 1955 | 1957 | 1959 | 9 |
| 1983 | 1955 | 1957 | 1958 | 9 |
| 1983 | 1955 | 1957 | 1959 | 9 |
| 1928 | 1955 | 1983 | 1984 | 9 |
| 1928 | 1955 | 1983 | 1985 | 9 |
| 1928 | 1955 | 1983 | 1988 | 9 |
| 1956 | 1955 | 1983 | 1984 | 9 |
| 1956 | 1955 | 1983 | 1985 | 9 |
| 1956 | 1955 | 1983 | 1988 | 9 |
| 1957 | 1955 | 1983 | 1984 | 9 |
| 1957 | 1955 | 1983 | 1985 | 9 |
| 1957 | 1955 | 1983 | 1988 | 9 |
| 1955 | 1957 | 1959 | 1960 | 9 |
| 1955 | 1957 | 1959 | 1961 | 9 |
| 1958 | 1957 | 1959 | 1960 | 9 |
| 1958 | 1957 | 1959 | 1961 | 9 |
| 1957 | 1959 | 1961 | 1962 | 9 |

|      |      |      |      |   |
|------|------|------|------|---|
| 1957 | 1959 | 1961 | 1963 | 9 |
| 1957 | 1959 | 1961 | 1964 | 9 |
| 1960 | 1959 | 1961 | 1962 | 9 |
| 1960 | 1959 | 1961 | 1963 | 9 |
| 1960 | 1959 | 1961 | 1964 | 9 |
| 1959 | 1961 | 1964 | 1965 | 9 |
| 1959 | 1961 | 1964 | 1966 | 9 |
| 1959 | 1961 | 1964 | 1967 | 9 |
| 1962 | 1961 | 1964 | 1965 | 9 |
| 1962 | 1961 | 1964 | 1966 | 9 |
| 1962 | 1961 | 1964 | 1967 | 9 |
| 1963 | 1961 | 1964 | 1965 | 9 |
| 1963 | 1961 | 1964 | 1966 | 9 |
| 1963 | 1961 | 1964 | 1967 | 9 |
| 1961 | 1964 | 1967 | 1968 | 9 |
| 1961 | 1964 | 1967 | 1969 | 9 |
| 1961 | 1964 | 1967 | 1970 | 9 |
| 1965 | 1964 | 1967 | 1968 | 9 |
| 1965 | 1964 | 1967 | 1969 | 9 |
| 1965 | 1964 | 1967 | 1970 | 9 |
| 1966 | 1964 | 1967 | 1968 | 9 |
| 1966 | 1964 | 1967 | 1969 | 9 |
| 1966 | 1964 | 1967 | 1970 | 9 |
| 1964 | 1967 | 1970 | 1971 | 9 |
| 1964 | 1967 | 1970 | 1975 | 9 |
| 1964 | 1967 | 1970 | 1979 | 9 |
| 1968 | 1967 | 1970 | 1971 | 9 |
| 1968 | 1967 | 1970 | 1975 | 9 |
| 1968 | 1967 | 1970 | 1979 | 9 |
| 1969 | 1967 | 1970 | 1971 | 9 |
| 1969 | 1967 | 1970 | 1975 | 9 |
| 1969 | 1967 | 1970 | 1979 | 9 |
| 1967 | 1970 | 1971 | 1972 | 9 |
| 1967 | 1970 | 1971 | 1973 | 9 |
| 1967 | 1970 | 1971 | 1974 | 9 |
| 1975 | 1970 | 1971 | 1972 | 9 |
| 1975 | 1970 | 1971 | 1973 | 9 |
| 1975 | 1970 | 1971 | 1974 | 9 |
| 1979 | 1970 | 1971 | 1972 | 9 |
| 1979 | 1970 | 1971 | 1973 | 9 |
| 1979 | 1970 | 1971 | 1974 | 9 |
| 1967 | 1970 | 1975 | 1976 | 9 |
| 1967 | 1970 | 1975 | 1977 | 9 |
| 1967 | 1970 | 1975 | 1978 | 9 |
| 1971 | 1970 | 1975 | 1976 | 9 |
| 1971 | 1970 | 1975 | 1977 | 9 |
| 1971 | 1970 | 1975 | 1978 | 9 |
| 1979 | 1970 | 1975 | 1976 | 9 |
| 1979 | 1970 | 1975 | 1977 | 9 |
| 1979 | 1970 | 1975 | 1978 | 9 |
| 1967 | 1970 | 1979 | 1980 | 9 |
| 1967 | 1970 | 1979 | 1981 | 9 |
| 1967 | 1970 | 1979 | 1982 | 9 |
| 1971 | 1970 | 1979 | 1980 | 9 |

|      |      |      |      |   |
|------|------|------|------|---|
| 1971 | 1970 | 1979 | 1981 | 9 |
| 1971 | 1970 | 1979 | 1982 | 9 |
| 1975 | 1970 | 1979 | 1980 | 9 |
| 1975 | 1970 | 1979 | 1981 | 9 |
| 1975 | 1970 | 1979 | 1982 | 9 |
| 1955 | 1983 | 1985 | 1986 | 9 |
| 1955 | 1983 | 1985 | 1987 | 9 |
| 1984 | 1983 | 1985 | 1986 | 9 |
| 1984 | 1983 | 1985 | 1987 | 9 |
| 1988 | 1983 | 1985 | 1986 | 9 |
| 1988 | 1983 | 1985 | 1987 | 9 |
| 1955 | 1983 | 1988 | 1989 | 9 |
| 1955 | 1983 | 1988 | 1990 | 9 |
| 1955 | 1983 | 1988 | 1991 | 9 |
| 1984 | 1983 | 1988 | 1989 | 9 |
| 1984 | 1983 | 1988 | 1990 | 9 |
| 1984 | 1983 | 1988 | 1991 | 9 |
| 1985 | 1983 | 1988 | 1989 | 9 |
| 1985 | 1983 | 1988 | 1990 | 9 |
| 1985 | 1983 | 1988 | 1991 | 9 |
| 1983 | 1988 | 1991 | 1992 | 9 |
| 1983 | 1988 | 1991 | 1993 | 9 |
| 1983 | 1988 | 1991 | 2018 | 9 |
| 1989 | 1988 | 1991 | 1992 | 9 |
| 1989 | 1988 | 1991 | 1993 | 9 |
| 1989 | 1988 | 1991 | 2018 | 9 |
| 1990 | 1988 | 1991 | 1992 | 9 |
| 1990 | 1988 | 1991 | 1993 | 9 |
| 1990 | 1988 | 1991 | 2018 | 9 |
| 1988 | 1991 | 1993 | 1994 | 9 |
| 1988 | 1991 | 1993 | 1995 | 9 |
| 1988 | 1991 | 1993 | 1996 | 9 |
| 1992 | 1991 | 1993 | 1994 | 9 |
| 1992 | 1991 | 1993 | 1995 | 9 |
| 1992 | 1991 | 1993 | 1996 | 9 |
| 2018 | 1991 | 1993 | 1994 | 9 |
| 2018 | 1991 | 1993 | 1995 | 9 |
| 2018 | 1991 | 1993 | 1996 | 9 |
| 1988 | 1991 | 2018 | 2019 | 9 |
| 1988 | 1991 | 2018 | 2020 | 9 |
| 1988 | 1991 | 2018 | 2046 | 9 |
| 1992 | 1991 | 2018 | 2019 | 9 |
| 1992 | 1991 | 2018 | 2020 | 9 |
| 1992 | 1991 | 2018 | 2046 | 9 |
| 1993 | 1991 | 2018 | 2019 | 9 |
| 1993 | 1991 | 2018 | 2020 | 9 |
| 1993 | 1991 | 2018 | 2046 | 9 |
| 1991 | 1993 | 1996 | 1997 | 9 |
| 1991 | 1993 | 1996 | 1998 | 9 |
| 1991 | 1993 | 1996 | 1999 | 9 |
| 1994 | 1993 | 1996 | 1997 | 9 |
| 1994 | 1993 | 1996 | 1998 | 9 |
| 1994 | 1993 | 1996 | 1999 | 9 |
| 1995 | 1993 | 1996 | 1997 | 9 |

|      |      |      |      |   |
|------|------|------|------|---|
| 1995 | 1993 | 1996 | 1998 | 9 |
| 1995 | 1993 | 1996 | 1999 | 9 |
| 1993 | 1996 | 1999 | 2000 | 9 |
| 1993 | 1996 | 1999 | 2001 | 9 |
| 1993 | 1996 | 1999 | 2002 | 9 |
| 1997 | 1996 | 1999 | 2000 | 9 |
| 1997 | 1996 | 1999 | 2001 | 9 |
| 1997 | 1996 | 1999 | 2002 | 9 |
| 1998 | 1996 | 1999 | 2000 | 9 |
| 1998 | 1996 | 1999 | 2001 | 9 |
| 1998 | 1996 | 1999 | 2002 | 9 |
| 1996 | 1999 | 2002 | 2003 | 9 |
| 1996 | 1999 | 2002 | 2004 | 9 |
| 1996 | 1999 | 2002 | 2005 | 9 |
| 2000 | 1999 | 2002 | 2003 | 9 |
| 2000 | 1999 | 2002 | 2004 | 9 |
| 2000 | 1999 | 2002 | 2005 | 9 |
| 2001 | 1999 | 2002 | 2003 | 9 |
| 2001 | 1999 | 2002 | 2004 | 9 |
| 2001 | 1999 | 2002 | 2005 | 9 |
| 1999 | 2002 | 2005 | 2006 | 9 |
| 1999 | 2002 | 2005 | 2007 | 9 |
| 1999 | 2002 | 2005 | 2008 | 9 |
| 2003 | 2002 | 2005 | 2006 | 9 |
| 2003 | 2002 | 2005 | 2007 | 9 |
| 2003 | 2002 | 2005 | 2008 | 9 |
| 2004 | 2002 | 2005 | 2006 | 9 |
| 2004 | 2002 | 2005 | 2007 | 9 |
| 2004 | 2002 | 2005 | 2008 | 9 |
| 2002 | 2005 | 2008 | 2009 | 9 |
| 2002 | 2005 | 2008 | 2010 | 9 |
| 2002 | 2005 | 2008 | 2011 | 9 |
| 2006 | 2005 | 2008 | 2009 | 9 |
| 2006 | 2005 | 2008 | 2010 | 9 |
| 2006 | 2005 | 2008 | 2011 | 9 |
| 2007 | 2005 | 2008 | 2009 | 9 |
| 2007 | 2005 | 2008 | 2010 | 9 |
| 2007 | 2005 | 2008 | 2011 | 9 |
| 2005 | 2008 | 2011 | 2012 | 9 |
| 2005 | 2008 | 2011 | 2013 | 9 |
| 2005 | 2008 | 2011 | 2014 | 9 |
| 2009 | 2008 | 2011 | 2012 | 9 |
| 2009 | 2008 | 2011 | 2013 | 9 |
| 2009 | 2008 | 2011 | 2014 | 9 |
| 2010 | 2008 | 2011 | 2012 | 9 |
| 2010 | 2008 | 2011 | 2013 | 9 |
| 2010 | 2008 | 2011 | 2014 | 9 |
| 2008 | 2011 | 2014 | 2015 | 9 |
| 2008 | 2011 | 2014 | 2016 | 9 |
| 2008 | 2011 | 2014 | 2017 | 9 |
| 2012 | 2011 | 2014 | 2015 | 9 |
| 2012 | 2011 | 2014 | 2016 | 9 |
| 2012 | 2011 | 2014 | 2017 | 9 |
| 2013 | 2011 | 2014 | 2015 | 9 |

|      |      |      |      |   |
|------|------|------|------|---|
| 2013 | 2011 | 2014 | 2016 | 9 |
| 2013 | 2011 | 2014 | 2017 | 9 |
| 1991 | 2018 | 2020 | 2021 | 9 |
| 1991 | 2018 | 2020 | 2022 | 9 |
| 2019 | 2018 | 2020 | 2021 | 9 |
| 2019 | 2018 | 2020 | 2022 | 9 |
| 2046 | 2018 | 2020 | 2021 | 9 |
| 2046 | 2018 | 2020 | 2022 | 9 |
| 1991 | 2018 | 2046 | 2047 | 9 |
| 1991 | 2018 | 2046 | 2048 | 9 |
| 1991 | 2018 | 2046 | 2051 | 9 |
| 2019 | 2018 | 2046 | 2047 | 9 |
| 2019 | 2018 | 2046 | 2048 | 9 |
| 2019 | 2018 | 2046 | 2051 | 9 |
| 2020 | 2018 | 2046 | 2047 | 9 |
| 2020 | 2018 | 2046 | 2048 | 9 |
| 2020 | 2018 | 2046 | 2051 | 9 |
| 2018 | 2020 | 2022 | 2023 | 9 |
| 2018 | 2020 | 2022 | 2024 | 9 |
| 2021 | 2020 | 2022 | 2023 | 9 |
| 2021 | 2020 | 2022 | 2024 | 9 |
| 2020 | 2022 | 2024 | 2025 | 9 |
| 2020 | 2022 | 2024 | 2026 | 9 |
| 2020 | 2022 | 2024 | 2027 | 9 |
| 2023 | 2022 | 2024 | 2025 | 9 |
| 2023 | 2022 | 2024 | 2026 | 9 |
| 2023 | 2022 | 2024 | 2027 | 9 |
| 2022 | 2024 | 2027 | 2028 | 9 |
| 2022 | 2024 | 2027 | 2029 | 9 |
| 2022 | 2024 | 2027 | 2030 | 9 |
| 2025 | 2024 | 2027 | 2028 | 9 |
| 2025 | 2024 | 2027 | 2029 | 9 |
| 2025 | 2024 | 2027 | 2030 | 9 |
| 2026 | 2024 | 2027 | 2028 | 9 |
| 2026 | 2024 | 2027 | 2029 | 9 |
| 2026 | 2024 | 2027 | 2030 | 9 |
| 2024 | 2027 | 2030 | 2031 | 9 |
| 2024 | 2027 | 2030 | 2032 | 9 |
| 2024 | 2027 | 2030 | 2033 | 9 |
| 2028 | 2027 | 2030 | 2031 | 9 |
| 2028 | 2027 | 2030 | 2032 | 9 |
| 2028 | 2027 | 2030 | 2033 | 9 |
| 2029 | 2027 | 2030 | 2031 | 9 |
| 2029 | 2027 | 2030 | 2032 | 9 |
| 2029 | 2027 | 2030 | 2033 | 9 |
| 2027 | 2030 | 2033 | 2034 | 9 |
| 2027 | 2030 | 2033 | 2038 | 9 |
| 2027 | 2030 | 2033 | 2042 | 9 |
| 2031 | 2030 | 2033 | 2034 | 9 |
| 2031 | 2030 | 2033 | 2038 | 9 |
| 2031 | 2030 | 2033 | 2042 | 9 |
| 2032 | 2030 | 2033 | 2034 | 9 |
| 2032 | 2030 | 2033 | 2038 | 9 |
| 2032 | 2030 | 2033 | 2042 | 9 |

|      |      |      |      |   |
|------|------|------|------|---|
| 2030 | 2033 | 2034 | 2035 | 9 |
| 2030 | 2033 | 2034 | 2036 | 9 |
| 2030 | 2033 | 2034 | 2037 | 9 |
| 2038 | 2033 | 2034 | 2035 | 9 |
| 2038 | 2033 | 2034 | 2036 | 9 |
| 2038 | 2033 | 2034 | 2037 | 9 |
| 2042 | 2033 | 2034 | 2035 | 9 |
| 2042 | 2033 | 2034 | 2036 | 9 |
| 2042 | 2033 | 2034 | 2037 | 9 |
| 2030 | 2033 | 2038 | 2039 | 9 |
| 2030 | 2033 | 2038 | 2040 | 9 |
| 2030 | 2033 | 2038 | 2041 | 9 |
| 2034 | 2033 | 2038 | 2039 | 9 |
| 2034 | 2033 | 2038 | 2040 | 9 |
| 2034 | 2033 | 2038 | 2041 | 9 |
| 2042 | 2033 | 2038 | 2039 | 9 |
| 2042 | 2033 | 2038 | 2040 | 9 |
| 2042 | 2033 | 2038 | 2041 | 9 |
| 2030 | 2033 | 2042 | 2043 | 9 |
| 2030 | 2033 | 2042 | 2044 | 9 |
| 2030 | 2033 | 2042 | 2045 | 9 |
| 2034 | 2033 | 2042 | 2043 | 9 |
| 2034 | 2033 | 2042 | 2044 | 9 |
| 2034 | 2033 | 2042 | 2045 | 9 |
| 2038 | 2033 | 2042 | 2043 | 9 |
| 2038 | 2033 | 2042 | 2044 | 9 |
| 2038 | 2033 | 2042 | 2045 | 9 |
| 2018 | 2046 | 2048 | 2049 | 9 |
| 2018 | 2046 | 2048 | 2050 | 9 |
| 2047 | 2046 | 2048 | 2049 | 9 |
| 2047 | 2046 | 2048 | 2050 | 9 |
| 2051 | 2046 | 2048 | 2049 | 9 |
| 2051 | 2046 | 2048 | 2050 | 9 |
| 2018 | 2046 | 2051 | 2052 | 9 |
| 2018 | 2046 | 2051 | 2053 | 9 |
| 2018 | 2046 | 2051 | 2054 | 9 |
| 2047 | 2046 | 2051 | 2052 | 9 |
| 2047 | 2046 | 2051 | 2053 | 9 |
| 2047 | 2046 | 2051 | 2054 | 9 |
| 2048 | 2046 | 2051 | 2052 | 9 |
| 2048 | 2046 | 2051 | 2053 | 9 |
| 2048 | 2046 | 2051 | 2054 | 9 |
| 2046 | 2051 | 2054 | 2055 | 9 |
| 2046 | 2051 | 2054 | 2056 | 9 |
| 2046 | 2051 | 2054 | 2081 | 9 |
| 2052 | 2051 | 2054 | 2055 | 9 |
| 2052 | 2051 | 2054 | 2056 | 9 |
| 2052 | 2051 | 2054 | 2081 | 9 |
| 2053 | 2051 | 2054 | 2055 | 9 |
| 2053 | 2051 | 2054 | 2056 | 9 |
| 2053 | 2051 | 2054 | 2081 | 9 |
| 2051 | 2054 | 2056 | 2057 | 9 |
| 2051 | 2054 | 2056 | 2058 | 9 |
| 2051 | 2054 | 2056 | 2059 | 9 |

|      |      |      |      |   |
|------|------|------|------|---|
| 2055 | 2054 | 2056 | 2057 | 9 |
| 2055 | 2054 | 2056 | 2058 | 9 |
| 2055 | 2054 | 2056 | 2059 | 9 |
| 2081 | 2054 | 2056 | 2057 | 9 |
| 2081 | 2054 | 2056 | 2058 | 9 |
| 2081 | 2054 | 2056 | 2059 | 9 |
| 2051 | 2054 | 2081 | 2082 | 9 |
| 2051 | 2054 | 2081 | 2083 | 9 |
| 2051 | 2054 | 2081 | 2109 | 9 |
| 2055 | 2054 | 2081 | 2082 | 9 |
| 2055 | 2054 | 2081 | 2083 | 9 |
| 2055 | 2054 | 2081 | 2109 | 9 |
| 2056 | 2054 | 2081 | 2082 | 9 |
| 2056 | 2054 | 2081 | 2083 | 9 |
| 2056 | 2054 | 2081 | 2109 | 9 |
| 2054 | 2056 | 2059 | 2060 | 9 |
| 2054 | 2056 | 2059 | 2061 | 9 |
| 2054 | 2056 | 2059 | 2062 | 9 |
| 2057 | 2056 | 2059 | 2060 | 9 |
| 2057 | 2056 | 2059 | 2061 | 9 |
| 2057 | 2056 | 2059 | 2062 | 9 |
| 2058 | 2056 | 2059 | 2060 | 9 |
| 2058 | 2056 | 2059 | 2061 | 9 |
| 2058 | 2056 | 2059 | 2062 | 9 |
| 2056 | 2059 | 2062 | 2063 | 9 |
| 2056 | 2059 | 2062 | 2064 | 9 |
| 2056 | 2059 | 2062 | 2065 | 9 |
| 2060 | 2059 | 2062 | 2063 | 9 |
| 2060 | 2059 | 2062 | 2064 | 9 |
| 2060 | 2059 | 2062 | 2065 | 9 |
| 2061 | 2059 | 2062 | 2063 | 9 |
| 2061 | 2059 | 2062 | 2064 | 9 |
| 2061 | 2059 | 2062 | 2065 | 9 |
| 2059 | 2062 | 2065 | 2066 | 9 |
| 2059 | 2062 | 2065 | 2067 | 9 |
| 2059 | 2062 | 2065 | 2068 | 9 |
| 2063 | 2062 | 2065 | 2066 | 9 |
| 2063 | 2062 | 2065 | 2067 | 9 |
| 2063 | 2062 | 2065 | 2068 | 9 |
| 2064 | 2062 | 2065 | 2066 | 9 |
| 2064 | 2062 | 2065 | 2067 | 9 |
| 2064 | 2062 | 2065 | 2068 | 9 |
| 2062 | 2065 | 2068 | 2069 | 9 |
| 2062 | 2065 | 2068 | 2070 | 9 |
| 2062 | 2065 | 2068 | 2071 | 9 |
| 2066 | 2065 | 2068 | 2069 | 9 |
| 2066 | 2065 | 2068 | 2070 | 9 |
| 2066 | 2065 | 2068 | 2071 | 9 |
| 2067 | 2065 | 2068 | 2069 | 9 |
| 2067 | 2065 | 2068 | 2070 | 9 |
| 2067 | 2065 | 2068 | 2071 | 9 |
| 2065 | 2068 | 2071 | 2072 | 9 |
| 2065 | 2068 | 2071 | 2073 | 9 |
| 2065 | 2068 | 2071 | 2074 | 9 |

|      |      |      |      |   |
|------|------|------|------|---|
| 2069 | 2068 | 2071 | 2072 | 9 |
| 2069 | 2068 | 2071 | 2073 | 9 |
| 2069 | 2068 | 2071 | 2074 | 9 |
| 2070 | 2068 | 2071 | 2072 | 9 |
| 2070 | 2068 | 2071 | 2073 | 9 |
| 2070 | 2068 | 2071 | 2074 | 9 |
| 2068 | 2071 | 2074 | 2075 | 9 |
| 2068 | 2071 | 2074 | 2076 | 9 |
| 2068 | 2071 | 2074 | 2077 | 9 |
| 2072 | 2071 | 2074 | 2075 | 9 |
| 2072 | 2071 | 2074 | 2076 | 9 |
| 2072 | 2071 | 2074 | 2077 | 9 |
| 2073 | 2071 | 2074 | 2075 | 9 |
| 2073 | 2071 | 2074 | 2076 | 9 |
| 2073 | 2071 | 2074 | 2077 | 9 |
| 2071 | 2074 | 2077 | 2078 | 9 |
| 2071 | 2074 | 2077 | 2079 | 9 |
| 2071 | 2074 | 2077 | 2080 | 9 |
| 2075 | 2074 | 2077 | 2078 | 9 |
| 2075 | 2074 | 2077 | 2079 | 9 |
| 2075 | 2074 | 2077 | 2080 | 9 |
| 2076 | 2074 | 2077 | 2078 | 9 |
| 2076 | 2074 | 2077 | 2079 | 9 |
| 2076 | 2074 | 2077 | 2080 | 9 |
| 2054 | 2081 | 2083 | 2084 | 9 |
| 2054 | 2081 | 2083 | 2085 | 9 |
| 2082 | 2081 | 2083 | 2084 | 9 |
| 2082 | 2081 | 2083 | 2085 | 9 |
| 2109 | 2081 | 2083 | 2084 | 9 |
| 2109 | 2081 | 2083 | 2085 | 9 |
| 2054 | 2081 | 2109 | 2110 | 9 |
| 2054 | 2081 | 2109 | 2111 | 9 |
| 2054 | 2081 | 2109 | 2114 | 9 |
| 2082 | 2081 | 2109 | 2110 | 9 |
| 2082 | 2081 | 2109 | 2111 | 9 |
| 2082 | 2081 | 2109 | 2114 | 9 |
| 2083 | 2081 | 2109 | 2110 | 9 |
| 2083 | 2081 | 2109 | 2111 | 9 |
| 2083 | 2081 | 2109 | 2114 | 9 |
| 2081 | 2083 | 2085 | 2086 | 9 |
| 2081 | 2083 | 2085 | 2087 | 9 |
| 2084 | 2083 | 2085 | 2086 | 9 |
| 2084 | 2083 | 2085 | 2087 | 9 |
| 2083 | 2085 | 2087 | 2088 | 9 |
| 2083 | 2085 | 2087 | 2089 | 9 |
| 2083 | 2085 | 2087 | 2090 | 9 |
| 2086 | 2085 | 2087 | 2088 | 9 |
| 2086 | 2085 | 2087 | 2089 | 9 |
| 2086 | 2085 | 2087 | 2090 | 9 |
| 2085 | 2087 | 2090 | 2091 | 9 |
| 2085 | 2087 | 2090 | 2092 | 9 |
| 2085 | 2087 | 2090 | 2093 | 9 |
| 2088 | 2087 | 2090 | 2091 | 9 |
| 2088 | 2087 | 2090 | 2092 | 9 |



|      |      |      |      |   |
|------|------|------|------|---|
| 2088 | 2087 | 2090 | 2093 | 9 |
| 2089 | 2087 | 2090 | 2091 | 9 |
| 2089 | 2087 | 2090 | 2092 | 9 |
| 2089 | 2087 | 2090 | 2093 | 9 |
| 2087 | 2090 | 2093 | 2094 | 9 |
| 2087 | 2090 | 2093 | 2095 | 9 |
| 2087 | 2090 | 2093 | 2096 | 9 |
| 2091 | 2090 | 2093 | 2094 | 9 |
| 2091 | 2090 | 2093 | 2095 | 9 |
| 2091 | 2090 | 2093 | 2096 | 9 |
| 2092 | 2090 | 2093 | 2094 | 9 |
| 2092 | 2090 | 2093 | 2095 | 9 |
| 2092 | 2090 | 2093 | 2096 | 9 |
| 2090 | 2093 | 2096 | 2097 | 9 |
| 2090 | 2093 | 2096 | 2101 | 9 |
| 2090 | 2093 | 2096 | 2105 | 9 |
| 2094 | 2093 | 2096 | 2097 | 9 |
| 2094 | 2093 | 2096 | 2101 | 9 |
| 2094 | 2093 | 2096 | 2105 | 9 |
| 2095 | 2093 | 2096 | 2097 | 9 |
| 2095 | 2093 | 2096 | 2101 | 9 |
| 2095 | 2093 | 2096 | 2105 | 9 |
| 2093 | 2096 | 2097 | 2098 | 9 |
| 2093 | 2096 | 2097 | 2099 | 9 |
| 2093 | 2096 | 2097 | 2100 | 9 |
| 2101 | 2096 | 2097 | 2098 | 9 |
| 2101 | 2096 | 2097 | 2099 | 9 |
| 2101 | 2096 | 2097 | 2100 | 9 |
| 2105 | 2096 | 2097 | 2098 | 9 |
| 2105 | 2096 | 2097 | 2099 | 9 |
| 2105 | 2096 | 2097 | 2100 | 9 |
| 2093 | 2096 | 2101 | 2102 | 9 |
| 2093 | 2096 | 2101 | 2103 | 9 |
| 2093 | 2096 | 2101 | 2104 | 9 |
| 2097 | 2096 | 2101 | 2102 | 9 |
| 2097 | 2096 | 2101 | 2103 | 9 |
| 2097 | 2096 | 2101 | 2104 | 9 |
| 2105 | 2096 | 2101 | 2102 | 9 |
| 2105 | 2096 | 2101 | 2103 | 9 |
| 2105 | 2096 | 2101 | 2104 | 9 |
| 2093 | 2096 | 2105 | 2106 | 9 |
| 2093 | 2096 | 2105 | 2107 | 9 |
| 2093 | 2096 | 2105 | 2108 | 9 |
| 2097 | 2096 | 2105 | 2106 | 9 |
| 2097 | 2096 | 2105 | 2107 | 9 |
| 2097 | 2096 | 2105 | 2108 | 9 |
| 2101 | 2096 | 2105 | 2106 | 9 |
| 2101 | 2096 | 2105 | 2107 | 9 |
| 2101 | 2096 | 2105 | 2108 | 9 |
| 2081 | 2109 | 2111 | 2112 | 9 |
| 2081 | 2109 | 2111 | 2113 | 9 |
| 2110 | 2109 | 2111 | 2112 | 9 |
| 2110 | 2109 | 2111 | 2113 | 9 |
| 2114 | 2109 | 2111 | 2112 | 9 |

|      |      |      |      |   |
|------|------|------|------|---|
| 2114 | 2109 | 2111 | 2113 | 9 |
| 2081 | 2109 | 2114 | 2115 | 9 |
| 2081 | 2109 | 2114 | 2116 | 9 |
| 2081 | 2109 | 2114 | 2117 | 9 |
| 2110 | 2109 | 2114 | 2115 | 9 |
| 2110 | 2109 | 2114 | 2116 | 9 |
| 2110 | 2109 | 2114 | 2117 | 9 |
| 2111 | 2109 | 2114 | 2115 | 9 |
| 2111 | 2109 | 2114 | 2116 | 9 |
| 2111 | 2109 | 2114 | 2117 | 9 |
| 2109 | 2114 | 2117 | 2118 | 9 |
| 2109 | 2114 | 2117 | 2119 | 9 |
| 2109 | 2114 | 2117 | 2144 | 9 |
| 2115 | 2114 | 2117 | 2118 | 9 |
| 2115 | 2114 | 2117 | 2119 | 9 |
| 2115 | 2114 | 2117 | 2144 | 9 |
| 2116 | 2114 | 2117 | 2118 | 9 |
| 2116 | 2114 | 2117 | 2119 | 9 |
| 2116 | 2114 | 2117 | 2144 | 9 |
| 2114 | 2117 | 2119 | 2120 | 9 |
| 2114 | 2117 | 2119 | 2121 | 9 |
| 2114 | 2117 | 2119 | 2122 | 9 |
| 2118 | 2117 | 2119 | 2120 | 9 |
| 2118 | 2117 | 2119 | 2121 | 9 |
| 2118 | 2117 | 2119 | 2122 | 9 |
| 2144 | 2117 | 2119 | 2120 | 9 |
| 2144 | 2117 | 2119 | 2121 | 9 |
| 2144 | 2117 | 2119 | 2122 | 9 |
| 2114 | 2117 | 2144 | 2145 | 9 |
| 2114 | 2117 | 2144 | 2146 | 9 |
| 2114 | 2117 | 2144 | 2172 | 9 |
| 2118 | 2117 | 2144 | 2145 | 9 |
| 2118 | 2117 | 2144 | 2146 | 9 |
| 2118 | 2117 | 2144 | 2172 | 9 |
| 2119 | 2117 | 2144 | 2145 | 9 |
| 2119 | 2117 | 2144 | 2146 | 9 |
| 2119 | 2117 | 2144 | 2172 | 9 |
| 2117 | 2119 | 2122 | 2123 | 9 |
| 2117 | 2119 | 2122 | 2124 | 9 |
| 2117 | 2119 | 2122 | 2125 | 9 |
| 2120 | 2119 | 2122 | 2123 | 9 |
| 2120 | 2119 | 2122 | 2124 | 9 |
| 2120 | 2119 | 2122 | 2125 | 9 |
| 2121 | 2119 | 2122 | 2123 | 9 |
| 2121 | 2119 | 2122 | 2124 | 9 |
| 2121 | 2119 | 2122 | 2125 | 9 |
| 2119 | 2122 | 2125 | 2126 | 9 |
| 2119 | 2122 | 2125 | 2127 | 9 |
| 2119 | 2122 | 2125 | 2128 | 9 |
| 2123 | 2122 | 2125 | 2126 | 9 |
| 2123 | 2122 | 2125 | 2127 | 9 |
| 2123 | 2122 | 2125 | 2128 | 9 |
| 2124 | 2122 | 2125 | 2126 | 9 |
| 2124 | 2122 | 2125 | 2127 | 9 |

|      |      |      |      |   |
|------|------|------|------|---|
| 2124 | 2122 | 2125 | 2128 | 9 |
| 2122 | 2125 | 2128 | 2129 | 9 |
| 2122 | 2125 | 2128 | 2130 | 9 |
| 2122 | 2125 | 2128 | 2131 | 9 |
| 2126 | 2125 | 2128 | 2129 | 9 |
| 2126 | 2125 | 2128 | 2130 | 9 |
| 2126 | 2125 | 2128 | 2131 | 9 |
| 2127 | 2125 | 2128 | 2129 | 9 |
| 2127 | 2125 | 2128 | 2130 | 9 |
| 2127 | 2125 | 2128 | 2131 | 9 |
| 2125 | 2128 | 2131 | 2132 | 9 |
| 2125 | 2128 | 2131 | 2133 | 9 |
| 2125 | 2128 | 2131 | 2134 | 9 |
| 2129 | 2128 | 2131 | 2132 | 9 |
| 2129 | 2128 | 2131 | 2133 | 9 |
| 2129 | 2128 | 2131 | 2134 | 9 |
| 2130 | 2128 | 2131 | 2132 | 9 |
| 2130 | 2128 | 2131 | 2133 | 9 |
| 2130 | 2128 | 2131 | 2134 | 9 |
| 2128 | 2131 | 2134 | 2135 | 9 |
| 2128 | 2131 | 2134 | 2136 | 9 |
| 2128 | 2131 | 2134 | 2137 | 9 |
| 2132 | 2131 | 2134 | 2135 | 9 |
| 2132 | 2131 | 2134 | 2136 | 9 |
| 2132 | 2131 | 2134 | 2137 | 9 |
| 2133 | 2131 | 2134 | 2135 | 9 |
| 2133 | 2131 | 2134 | 2136 | 9 |
| 2133 | 2131 | 2134 | 2137 | 9 |
| 2131 | 2134 | 2137 | 2138 | 9 |
| 2131 | 2134 | 2137 | 2139 | 9 |
| 2131 | 2134 | 2137 | 2140 | 9 |
| 2135 | 2134 | 2137 | 2138 | 9 |
| 2135 | 2134 | 2137 | 2139 | 9 |
| 2135 | 2134 | 2137 | 2140 | 9 |
| 2136 | 2134 | 2137 | 2138 | 9 |
| 2136 | 2134 | 2137 | 2139 | 9 |
| 2136 | 2134 | 2137 | 2140 | 9 |
| 2134 | 2137 | 2140 | 2141 | 9 |
| 2134 | 2137 | 2140 | 2142 | 9 |
| 2134 | 2137 | 2140 | 2143 | 9 |
| 2138 | 2137 | 2140 | 2141 | 9 |
| 2138 | 2137 | 2140 | 2142 | 9 |
| 2138 | 2137 | 2140 | 2143 | 9 |
| 2139 | 2137 | 2140 | 2141 | 9 |
| 2139 | 2137 | 2140 | 2142 | 9 |
| 2139 | 2137 | 2140 | 2143 | 9 |
| 2117 | 2144 | 2146 | 2147 | 9 |
| 2117 | 2144 | 2146 | 2148 | 9 |
| 2145 | 2144 | 2146 | 2147 | 9 |
| 2145 | 2144 | 2146 | 2148 | 9 |
| 2172 | 2144 | 2146 | 2147 | 9 |
| 2172 | 2144 | 2146 | 2148 | 9 |
| 2117 | 2144 | 2172 | 2173 | 9 |
| 2117 | 2144 | 2172 | 2174 | 9 |

|      |      |      |      |   |
|------|------|------|------|---|
| 2117 | 2144 | 2172 | 2177 | 9 |
| 2145 | 2144 | 2172 | 2173 | 9 |
| 2145 | 2144 | 2172 | 2174 | 9 |
| 2145 | 2144 | 2172 | 2177 | 9 |
| 2146 | 2144 | 2172 | 2173 | 9 |
| 2146 | 2144 | 2172 | 2174 | 9 |
| 2146 | 2144 | 2172 | 2177 | 9 |
| 2144 | 2146 | 2148 | 2149 | 9 |
| 2144 | 2146 | 2148 | 2150 | 9 |
| 2147 | 2146 | 2148 | 2149 | 9 |
| 2147 | 2146 | 2148 | 2150 | 9 |
| 2146 | 2148 | 2150 | 2151 | 9 |
| 2146 | 2148 | 2150 | 2152 | 9 |
| 2146 | 2148 | 2150 | 2153 | 9 |
| 2149 | 2148 | 2150 | 2151 | 9 |
| 2149 | 2148 | 2150 | 2152 | 9 |
| 2149 | 2148 | 2150 | 2153 | 9 |
| 2148 | 2150 | 2153 | 2154 | 9 |
| 2148 | 2150 | 2153 | 2155 | 9 |
| 2148 | 2150 | 2153 | 2156 | 9 |
| 2151 | 2150 | 2153 | 2154 | 9 |
| 2151 | 2150 | 2153 | 2155 | 9 |
| 2151 | 2150 | 2153 | 2156 | 9 |
| 2152 | 2150 | 2153 | 2154 | 9 |
| 2152 | 2150 | 2153 | 2155 | 9 |
| 2152 | 2150 | 2153 | 2156 | 9 |
| 2150 | 2153 | 2156 | 2157 | 9 |
| 2150 | 2153 | 2156 | 2158 | 9 |
| 2150 | 2153 | 2156 | 2159 | 9 |
| 2154 | 2153 | 2156 | 2157 | 9 |
| 2154 | 2153 | 2156 | 2158 | 9 |
| 2154 | 2153 | 2156 | 2159 | 9 |
| 2155 | 2153 | 2156 | 2157 | 9 |
| 2155 | 2153 | 2156 | 2158 | 9 |
| 2155 | 2153 | 2156 | 2159 | 9 |
| 2153 | 2156 | 2159 | 2160 | 9 |
| 2153 | 2156 | 2159 | 2164 | 9 |
| 2153 | 2156 | 2159 | 2168 | 9 |
| 2157 | 2156 | 2159 | 2160 | 9 |
| 2157 | 2156 | 2159 | 2164 | 9 |
| 2157 | 2156 | 2159 | 2168 | 9 |
| 2158 | 2156 | 2159 | 2160 | 9 |
| 2158 | 2156 | 2159 | 2164 | 9 |
| 2158 | 2156 | 2159 | 2168 | 9 |
| 2156 | 2159 | 2160 | 2161 | 9 |
| 2156 | 2159 | 2160 | 2162 | 9 |
| 2156 | 2159 | 2160 | 2163 | 9 |
| 2164 | 2159 | 2160 | 2161 | 9 |
| 2164 | 2159 | 2160 | 2162 | 9 |
| 2164 | 2159 | 2160 | 2163 | 9 |
| 2168 | 2159 | 2160 | 2161 | 9 |
| 2168 | 2159 | 2160 | 2162 | 9 |
| 2168 | 2159 | 2160 | 2163 | 9 |
| 2156 | 2159 | 2164 | 2165 | 9 |

|      |      |      |      |   |
|------|------|------|------|---|
| 2156 | 2159 | 2164 | 2166 | 9 |
| 2156 | 2159 | 2164 | 2167 | 9 |
| 2160 | 2159 | 2164 | 2165 | 9 |
| 2160 | 2159 | 2164 | 2166 | 9 |
| 2160 | 2159 | 2164 | 2167 | 9 |
| 2168 | 2159 | 2164 | 2165 | 9 |
| 2168 | 2159 | 2164 | 2166 | 9 |
| 2168 | 2159 | 2164 | 2167 | 9 |
| 2156 | 2159 | 2168 | 2169 | 9 |
| 2156 | 2159 | 2168 | 2170 | 9 |
| 2156 | 2159 | 2168 | 2171 | 9 |
| 2160 | 2159 | 2168 | 2169 | 9 |
| 2160 | 2159 | 2168 | 2170 | 9 |
| 2160 | 2159 | 2168 | 2171 | 9 |
| 2164 | 2159 | 2168 | 2169 | 9 |
| 2164 | 2159 | 2168 | 2170 | 9 |
| 2164 | 2159 | 2168 | 2171 | 9 |
| 2144 | 2172 | 2174 | 2175 | 9 |
| 2144 | 2172 | 2174 | 2176 | 9 |
| 2173 | 2172 | 2174 | 2175 | 9 |
| 2173 | 2172 | 2174 | 2176 | 9 |
| 2177 | 2172 | 2174 | 2175 | 9 |
| 2177 | 2172 | 2174 | 2176 | 9 |
| 2144 | 2172 | 2177 | 2178 | 9 |
| 2144 | 2172 | 2177 | 2179 | 9 |
| 2144 | 2172 | 2177 | 2180 | 9 |
| 2173 | 2172 | 2177 | 2178 | 9 |
| 2173 | 2172 | 2177 | 2179 | 9 |
| 2173 | 2172 | 2177 | 2180 | 9 |
| 2174 | 2172 | 2177 | 2178 | 9 |
| 2174 | 2172 | 2177 | 2179 | 9 |
| 2174 | 2172 | 2177 | 2180 | 9 |
| 2172 | 2177 | 2180 | 2181 | 9 |
| 2172 | 2177 | 2180 | 2182 | 9 |
| 2172 | 2177 | 2180 | 2207 | 9 |
| 2178 | 2177 | 2180 | 2181 | 9 |
| 2178 | 2177 | 2180 | 2182 | 9 |
| 2178 | 2177 | 2180 | 2207 | 9 |
| 2179 | 2177 | 2180 | 2181 | 9 |
| 2179 | 2177 | 2180 | 2182 | 9 |
| 2179 | 2177 | 2180 | 2207 | 9 |
| 2177 | 2180 | 2182 | 2183 | 9 |
| 2177 | 2180 | 2182 | 2184 | 9 |
| 2177 | 2180 | 2182 | 2185 | 9 |
| 2181 | 2180 | 2182 | 2183 | 9 |
| 2181 | 2180 | 2182 | 2184 | 9 |
| 2181 | 2180 | 2182 | 2185 | 9 |
| 2207 | 2180 | 2182 | 2183 | 9 |
| 2207 | 2180 | 2182 | 2184 | 9 |
| 2207 | 2180 | 2182 | 2185 | 9 |
| 2177 | 2180 | 2207 | 2208 | 9 |
| 2177 | 2180 | 2207 | 2209 | 9 |
| 2177 | 2180 | 2207 | 2235 | 9 |
| 2181 | 2180 | 2207 | 2208 | 9 |

|      |      |      |      |   |
|------|------|------|------|---|
| 2181 | 2180 | 2207 | 2209 | 9 |
| 2181 | 2180 | 2207 | 2235 | 9 |
| 2182 | 2180 | 2207 | 2208 | 9 |
| 2182 | 2180 | 2207 | 2209 | 9 |
| 2182 | 2180 | 2207 | 2235 | 9 |
| 2180 | 2182 | 2185 | 2186 | 9 |
| 2180 | 2182 | 2185 | 2187 | 9 |
| 2180 | 2182 | 2185 | 2188 | 9 |
| 2183 | 2182 | 2185 | 2186 | 9 |
| 2183 | 2182 | 2185 | 2187 | 9 |
| 2183 | 2182 | 2185 | 2188 | 9 |
| 2184 | 2182 | 2185 | 2186 | 9 |
| 2184 | 2182 | 2185 | 2187 | 9 |
| 2184 | 2182 | 2185 | 2188 | 9 |
| 2182 | 2185 | 2188 | 2189 | 9 |
| 2182 | 2185 | 2188 | 2190 | 9 |
| 2182 | 2185 | 2188 | 2191 | 9 |
| 2186 | 2185 | 2188 | 2189 | 9 |
| 2186 | 2185 | 2188 | 2190 | 9 |
| 2186 | 2185 | 2188 | 2191 | 9 |
| 2187 | 2185 | 2188 | 2189 | 9 |
| 2187 | 2185 | 2188 | 2190 | 9 |
| 2187 | 2185 | 2188 | 2191 | 9 |
| 2185 | 2188 | 2191 | 2192 | 9 |
| 2185 | 2188 | 2191 | 2193 | 9 |
| 2185 | 2188 | 2191 | 2194 | 9 |
| 2189 | 2188 | 2191 | 2192 | 9 |
| 2189 | 2188 | 2191 | 2193 | 9 |
| 2189 | 2188 | 2191 | 2194 | 9 |
| 2190 | 2188 | 2191 | 2192 | 9 |
| 2190 | 2188 | 2191 | 2193 | 9 |
| 2190 | 2188 | 2191 | 2194 | 9 |
| 2188 | 2191 | 2194 | 2195 | 9 |
| 2188 | 2191 | 2194 | 2196 | 9 |
| 2188 | 2191 | 2194 | 2197 | 9 |
| 2192 | 2191 | 2194 | 2195 | 9 |
| 2192 | 2191 | 2194 | 2196 | 9 |
| 2192 | 2191 | 2194 | 2197 | 9 |
| 2193 | 2191 | 2194 | 2195 | 9 |
| 2193 | 2191 | 2194 | 2196 | 9 |
| 2193 | 2191 | 2194 | 2197 | 9 |
| 2191 | 2194 | 2197 | 2198 | 9 |
| 2191 | 2194 | 2197 | 2199 | 9 |
| 2191 | 2194 | 2197 | 2200 | 9 |
| 2195 | 2194 | 2197 | 2198 | 9 |
| 2195 | 2194 | 2197 | 2199 | 9 |
| 2195 | 2194 | 2197 | 2200 | 9 |
| 2196 | 2194 | 2197 | 2198 | 9 |
| 2196 | 2194 | 2197 | 2199 | 9 |
| 2196 | 2194 | 2197 | 2200 | 9 |
| 2194 | 2197 | 2200 | 2201 | 9 |
| 2194 | 2197 | 2200 | 2202 | 9 |
| 2194 | 2197 | 2200 | 2203 | 9 |
| 2198 | 2197 | 2200 | 2201 | 9 |

|      |      |      |      |   |
|------|------|------|------|---|
| 2198 | 2197 | 2200 | 2202 | 9 |
| 2198 | 2197 | 2200 | 2203 | 9 |
| 2199 | 2197 | 2200 | 2201 | 9 |
| 2199 | 2197 | 2200 | 2202 | 9 |
| 2199 | 2197 | 2200 | 2203 | 9 |
| 2197 | 2200 | 2203 | 2204 | 9 |
| 2197 | 2200 | 2203 | 2205 | 9 |
| 2197 | 2200 | 2203 | 2206 | 9 |
| 2201 | 2200 | 2203 | 2204 | 9 |
| 2201 | 2200 | 2203 | 2205 | 9 |
| 2201 | 2200 | 2203 | 2206 | 9 |
| 2202 | 2200 | 2203 | 2204 | 9 |
| 2202 | 2200 | 2203 | 2205 | 9 |
| 2202 | 2200 | 2203 | 2206 | 9 |
| 2180 | 2207 | 2209 | 2210 | 9 |
| 2180 | 2207 | 2209 | 2211 | 9 |
| 2208 | 2207 | 2209 | 2210 | 9 |
| 2208 | 2207 | 2209 | 2211 | 9 |
| 2235 | 2207 | 2209 | 2210 | 9 |
| 2235 | 2207 | 2209 | 2211 | 9 |
| 2180 | 2207 | 2235 | 2236 | 9 |
| 2180 | 2207 | 2235 | 2237 | 9 |
| 2180 | 2207 | 2235 | 2240 | 9 |
| 2208 | 2207 | 2235 | 2236 | 9 |
| 2208 | 2207 | 2235 | 2237 | 9 |
| 2208 | 2207 | 2235 | 2240 | 9 |
| 2209 | 2207 | 2235 | 2236 | 9 |
| 2209 | 2207 | 2235 | 2237 | 9 |
| 2209 | 2207 | 2235 | 2240 | 9 |
| 2207 | 2209 | 2211 | 2212 | 9 |
| 2207 | 2209 | 2211 | 2213 | 9 |
| 2210 | 2209 | 2211 | 2212 | 9 |
| 2210 | 2209 | 2211 | 2213 | 9 |
| 2209 | 2211 | 2213 | 2214 | 9 |
| 2209 | 2211 | 2213 | 2215 | 9 |
| 2209 | 2211 | 2213 | 2216 | 9 |
| 2212 | 2211 | 2213 | 2214 | 9 |
| 2212 | 2211 | 2213 | 2215 | 9 |
| 2212 | 2211 | 2213 | 2216 | 9 |
| 2211 | 2213 | 2216 | 2217 | 9 |
| 2211 | 2213 | 2216 | 2218 | 9 |
| 2211 | 2213 | 2216 | 2219 | 9 |
| 2214 | 2213 | 2216 | 2217 | 9 |
| 2214 | 2213 | 2216 | 2218 | 9 |
| 2214 | 2213 | 2216 | 2219 | 9 |
| 2215 | 2213 | 2216 | 2217 | 9 |
| 2215 | 2213 | 2216 | 2218 | 9 |
| 2215 | 2213 | 2216 | 2219 | 9 |
| 2213 | 2216 | 2219 | 2220 | 9 |
| 2213 | 2216 | 2219 | 2221 | 9 |
| 2213 | 2216 | 2219 | 2222 | 9 |
| 2217 | 2216 | 2219 | 2220 | 9 |
| 2217 | 2216 | 2219 | 2221 | 9 |
| 2217 | 2216 | 2219 | 2222 | 9 |

|      |      |      |      |   |
|------|------|------|------|---|
| 2218 | 2216 | 2219 | 2220 | 9 |
| 2218 | 2216 | 2219 | 2221 | 9 |
| 2218 | 2216 | 2219 | 2222 | 9 |
| 2216 | 2219 | 2222 | 2223 | 9 |
| 2216 | 2219 | 2222 | 2227 | 9 |
| 2216 | 2219 | 2222 | 2231 | 9 |
| 2220 | 2219 | 2222 | 2223 | 9 |
| 2220 | 2219 | 2222 | 2227 | 9 |
| 2220 | 2219 | 2222 | 2231 | 9 |
| 2221 | 2219 | 2222 | 2223 | 9 |
| 2221 | 2219 | 2222 | 2227 | 9 |
| 2221 | 2219 | 2222 | 2231 | 9 |
| 2219 | 2222 | 2223 | 2224 | 9 |
| 2219 | 2222 | 2223 | 2225 | 9 |
| 2219 | 2222 | 2223 | 2226 | 9 |
| 2227 | 2222 | 2223 | 2224 | 9 |
| 2227 | 2222 | 2223 | 2225 | 9 |
| 2227 | 2222 | 2223 | 2226 | 9 |
| 2231 | 2222 | 2223 | 2224 | 9 |
| 2231 | 2222 | 2223 | 2225 | 9 |
| 2231 | 2222 | 2223 | 2226 | 9 |
| 2219 | 2222 | 2227 | 2228 | 9 |
| 2219 | 2222 | 2227 | 2229 | 9 |
| 2219 | 2222 | 2227 | 2230 | 9 |
| 2223 | 2222 | 2227 | 2228 | 9 |
| 2223 | 2222 | 2227 | 2229 | 9 |
| 2223 | 2222 | 2227 | 2230 | 9 |
| 2231 | 2222 | 2227 | 2228 | 9 |
| 2231 | 2222 | 2227 | 2229 | 9 |
| 2231 | 2222 | 2227 | 2230 | 9 |
| 2219 | 2222 | 2231 | 2232 | 9 |
| 2219 | 2222 | 2231 | 2233 | 9 |
| 2219 | 2222 | 2231 | 2234 | 9 |
| 2223 | 2222 | 2231 | 2232 | 9 |
| 2223 | 2222 | 2231 | 2233 | 9 |
| 2223 | 2222 | 2231 | 2234 | 9 |
| 2227 | 2222 | 2231 | 2232 | 9 |
| 2227 | 2222 | 2231 | 2233 | 9 |
| 2227 | 2222 | 2231 | 2234 | 9 |
| 2207 | 2235 | 2237 | 2238 | 9 |
| 2207 | 2235 | 2237 | 2239 | 9 |
| 2236 | 2235 | 2237 | 2238 | 9 |
| 2236 | 2235 | 2237 | 2239 | 9 |
| 2240 | 2235 | 2237 | 2238 | 9 |
| 2240 | 2235 | 2237 | 2239 | 9 |
| 2207 | 2235 | 2240 | 2241 | 9 |
| 2207 | 2235 | 2240 | 2242 | 9 |
| 2207 | 2235 | 2240 | 2243 | 9 |
| 2236 | 2235 | 2240 | 2241 | 9 |
| 2236 | 2235 | 2240 | 2242 | 9 |
| 2236 | 2235 | 2240 | 2243 | 9 |
| 2237 | 2235 | 2240 | 2241 | 9 |
| 2237 | 2235 | 2240 | 2242 | 9 |
| 2237 | 2235 | 2240 | 2243 | 9 |



|      |      |      |      |   |
|------|------|------|------|---|
| 2235 | 2240 | 2243 | 2244 | 9 |
| 2235 | 2240 | 2243 | 2245 | 9 |
| 2235 | 2240 | 2243 | 2270 | 9 |
| 2241 | 2240 | 2243 | 2244 | 9 |
| 2241 | 2240 | 2243 | 2245 | 9 |
| 2241 | 2240 | 2243 | 2270 | 9 |
| 2242 | 2240 | 2243 | 2244 | 9 |
| 2242 | 2240 | 2243 | 2245 | 9 |
| 2242 | 2240 | 2243 | 2270 | 9 |
| 2240 | 2243 | 2245 | 2246 | 9 |
| 2240 | 2243 | 2245 | 2247 | 9 |
| 2240 | 2243 | 2245 | 2248 | 9 |
| 2244 | 2243 | 2245 | 2246 | 9 |
| 2244 | 2243 | 2245 | 2247 | 9 |
| 2244 | 2243 | 2245 | 2248 | 9 |
| 2270 | 2243 | 2245 | 2246 | 9 |
| 2270 | 2243 | 2245 | 2247 | 9 |
| 2270 | 2243 | 2245 | 2248 | 9 |
| 2240 | 2243 | 2270 | 2271 | 9 |
| 2240 | 2243 | 2270 | 2272 | 9 |
| 2240 | 2243 | 2270 | 2298 | 9 |
| 2244 | 2243 | 2270 | 2271 | 9 |
| 2244 | 2243 | 2270 | 2272 | 9 |
| 2244 | 2243 | 2270 | 2298 | 9 |
| 2245 | 2243 | 2270 | 2271 | 9 |
| 2245 | 2243 | 2270 | 2272 | 9 |
| 2245 | 2243 | 2270 | 2298 | 9 |
| 2243 | 2245 | 2248 | 2249 | 9 |
| 2243 | 2245 | 2248 | 2250 | 9 |
| 2243 | 2245 | 2248 | 2251 | 9 |
| 2246 | 2245 | 2248 | 2249 | 9 |
| 2246 | 2245 | 2248 | 2250 | 9 |
| 2246 | 2245 | 2248 | 2251 | 9 |
| 2247 | 2245 | 2248 | 2249 | 9 |
| 2247 | 2245 | 2248 | 2250 | 9 |
| 2247 | 2245 | 2248 | 2251 | 9 |
| 2245 | 2248 | 2251 | 2252 | 9 |
| 2245 | 2248 | 2251 | 2253 | 9 |
| 2245 | 2248 | 2251 | 2254 | 9 |
| 2249 | 2248 | 2251 | 2252 | 9 |
| 2249 | 2248 | 2251 | 2253 | 9 |
| 2249 | 2248 | 2251 | 2254 | 9 |
| 2250 | 2248 | 2251 | 2252 | 9 |
| 2250 | 2248 | 2251 | 2253 | 9 |
| 2250 | 2248 | 2251 | 2254 | 9 |
| 2248 | 2251 | 2254 | 2255 | 9 |
| 2248 | 2251 | 2254 | 2256 | 9 |
| 2248 | 2251 | 2254 | 2257 | 9 |
| 2252 | 2251 | 2254 | 2255 | 9 |
| 2252 | 2251 | 2254 | 2256 | 9 |
| 2252 | 2251 | 2254 | 2257 | 9 |
| 2253 | 2251 | 2254 | 2255 | 9 |
| 2253 | 2251 | 2254 | 2256 | 9 |
| 2253 | 2251 | 2254 | 2257 | 9 |

|      |      |      |      |   |
|------|------|------|------|---|
| 2251 | 2254 | 2257 | 2258 | 9 |
| 2251 | 2254 | 2257 | 2259 | 9 |
| 2251 | 2254 | 2257 | 2260 | 9 |
| 2255 | 2254 | 2257 | 2258 | 9 |
| 2255 | 2254 | 2257 | 2259 | 9 |
| 2255 | 2254 | 2257 | 2260 | 9 |
| 2256 | 2254 | 2257 | 2258 | 9 |
| 2256 | 2254 | 2257 | 2259 | 9 |
| 2256 | 2254 | 2257 | 2260 | 9 |
| 2254 | 2257 | 2260 | 2261 | 9 |
| 2254 | 2257 | 2260 | 2262 | 9 |
| 2254 | 2257 | 2260 | 2263 | 9 |
| 2258 | 2257 | 2260 | 2261 | 9 |
| 2258 | 2257 | 2260 | 2262 | 9 |
| 2258 | 2257 | 2260 | 2263 | 9 |
| 2259 | 2257 | 2260 | 2261 | 9 |
| 2259 | 2257 | 2260 | 2262 | 9 |
| 2259 | 2257 | 2260 | 2263 | 9 |
| 2257 | 2260 | 2263 | 2264 | 9 |
| 2257 | 2260 | 2263 | 2265 | 9 |
| 2257 | 2260 | 2263 | 2266 | 9 |
| 2261 | 2260 | 2263 | 2264 | 9 |
| 2261 | 2260 | 2263 | 2265 | 9 |
| 2261 | 2260 | 2263 | 2266 | 9 |
| 2262 | 2260 | 2263 | 2264 | 9 |
| 2262 | 2260 | 2263 | 2265 | 9 |
| 2262 | 2260 | 2263 | 2266 | 9 |
| 2260 | 2263 | 2266 | 2267 | 9 |
| 2260 | 2263 | 2266 | 2268 | 9 |
| 2260 | 2263 | 2266 | 2269 | 9 |
| 2264 | 2263 | 2266 | 2267 | 9 |
| 2264 | 2263 | 2266 | 2268 | 9 |
| 2264 | 2263 | 2266 | 2269 | 9 |
| 2265 | 2263 | 2266 | 2267 | 9 |
| 2265 | 2263 | 2266 | 2268 | 9 |
| 2265 | 2263 | 2266 | 2269 | 9 |
| 2243 | 2270 | 2272 | 2273 | 9 |
| 2243 | 2270 | 2272 | 2274 | 9 |
| 2271 | 2270 | 2272 | 2273 | 9 |
| 2271 | 2270 | 2272 | 2274 | 9 |
| 2298 | 2270 | 2272 | 2273 | 9 |
| 2298 | 2270 | 2272 | 2274 | 9 |
| 2243 | 2270 | 2298 | 2299 | 9 |
| 2243 | 2270 | 2298 | 2300 | 9 |
| 2243 | 2270 | 2298 | 2303 | 9 |
| 2271 | 2270 | 2298 | 2299 | 9 |
| 2271 | 2270 | 2298 | 2300 | 9 |
| 2271 | 2270 | 2298 | 2303 | 9 |
| 2272 | 2270 | 2298 | 2299 | 9 |
| 2272 | 2270 | 2298 | 2300 | 9 |
| 2272 | 2270 | 2298 | 2303 | 9 |
| 2270 | 2272 | 2274 | 2275 | 9 |
| 2270 | 2272 | 2274 | 2276 | 9 |
| 2273 | 2272 | 2274 | 2275 | 9 |

|      |      |      |      |   |
|------|------|------|------|---|
| 2273 | 2272 | 2274 | 2276 | 9 |
| 2272 | 2274 | 2276 | 2277 | 9 |
| 2272 | 2274 | 2276 | 2278 | 9 |
| 2272 | 2274 | 2276 | 2279 | 9 |
| 2275 | 2274 | 2276 | 2277 | 9 |
| 2275 | 2274 | 2276 | 2278 | 9 |
| 2275 | 2274 | 2276 | 2279 | 9 |
| 2274 | 2276 | 2279 | 2280 | 9 |
| 2274 | 2276 | 2279 | 2281 | 9 |
| 2274 | 2276 | 2279 | 2282 | 9 |
| 2277 | 2276 | 2279 | 2280 | 9 |
| 2277 | 2276 | 2279 | 2281 | 9 |
| 2277 | 2276 | 2279 | 2282 | 9 |
| 2278 | 2276 | 2279 | 2280 | 9 |
| 2278 | 2276 | 2279 | 2281 | 9 |
| 2278 | 2276 | 2279 | 2282 | 9 |
| 2276 | 2279 | 2282 | 2283 | 9 |
| 2276 | 2279 | 2282 | 2284 | 9 |
| 2276 | 2279 | 2282 | 2285 | 9 |
| 2280 | 2279 | 2282 | 2283 | 9 |
| 2280 | 2279 | 2282 | 2284 | 9 |
| 2280 | 2279 | 2282 | 2285 | 9 |
| 2281 | 2279 | 2282 | 2283 | 9 |
| 2281 | 2279 | 2282 | 2284 | 9 |
| 2281 | 2279 | 2282 | 2285 | 9 |
| 2279 | 2282 | 2285 | 2286 | 9 |
| 2279 | 2282 | 2285 | 2290 | 9 |
| 2279 | 2282 | 2285 | 2294 | 9 |
| 2283 | 2282 | 2285 | 2286 | 9 |
| 2283 | 2282 | 2285 | 2290 | 9 |
| 2283 | 2282 | 2285 | 2294 | 9 |
| 2284 | 2282 | 2285 | 2286 | 9 |
| 2284 | 2282 | 2285 | 2290 | 9 |
| 2284 | 2282 | 2285 | 2294 | 9 |
| 2282 | 2285 | 2286 | 2287 | 9 |
| 2282 | 2285 | 2286 | 2288 | 9 |
| 2282 | 2285 | 2286 | 2289 | 9 |
| 2290 | 2285 | 2286 | 2287 | 9 |
| 2290 | 2285 | 2286 | 2288 | 9 |
| 2290 | 2285 | 2286 | 2289 | 9 |
| 2294 | 2285 | 2286 | 2287 | 9 |
| 2294 | 2285 | 2286 | 2288 | 9 |
| 2294 | 2285 | 2286 | 2289 | 9 |
| 2282 | 2285 | 2290 | 2291 | 9 |
| 2282 | 2285 | 2290 | 2292 | 9 |
| 2282 | 2285 | 2290 | 2293 | 9 |
| 2286 | 2285 | 2290 | 2291 | 9 |
| 2286 | 2285 | 2290 | 2292 | 9 |
| 2286 | 2285 | 2290 | 2293 | 9 |
| 2294 | 2285 | 2290 | 2291 | 9 |
| 2294 | 2285 | 2290 | 2292 | 9 |
| 2294 | 2285 | 2290 | 2293 | 9 |
| 2282 | 2285 | 2294 | 2295 | 9 |
| 2282 | 2285 | 2294 | 2296 | 9 |

|      |      |      |      |   |
|------|------|------|------|---|
| 2282 | 2285 | 2294 | 2297 | 9 |
| 2286 | 2285 | 2294 | 2295 | 9 |
| 2286 | 2285 | 2294 | 2296 | 9 |
| 2286 | 2285 | 2294 | 2297 | 9 |
| 2290 | 2285 | 2294 | 2295 | 9 |
| 2290 | 2285 | 2294 | 2296 | 9 |
| 2290 | 2285 | 2294 | 2297 | 9 |
| 2270 | 2298 | 2300 | 2301 | 9 |
| 2270 | 2298 | 2300 | 2302 | 9 |
| 2299 | 2298 | 2300 | 2301 | 9 |
| 2299 | 2298 | 2300 | 2302 | 9 |
| 2303 | 2298 | 2300 | 2301 | 9 |
| 2303 | 2298 | 2300 | 2302 | 9 |
| 2270 | 2298 | 2303 | 2304 | 9 |
| 2270 | 2298 | 2303 | 2305 | 9 |
| 2270 | 2298 | 2303 | 2306 | 9 |
| 2299 | 2298 | 2303 | 2304 | 9 |
| 2299 | 2298 | 2303 | 2305 | 9 |
| 2299 | 2298 | 2303 | 2306 | 9 |
| 2300 | 2298 | 2303 | 2304 | 9 |
| 2300 | 2298 | 2303 | 2305 | 9 |
| 2300 | 2298 | 2303 | 2306 | 9 |
| 2298 | 2303 | 2306 | 2307 | 9 |
| 2298 | 2303 | 2306 | 2308 | 9 |
| 2298 | 2303 | 2306 | 2333 | 9 |
| 2304 | 2303 | 2306 | 2307 | 9 |
| 2304 | 2303 | 2306 | 2308 | 9 |
| 2304 | 2303 | 2306 | 2333 | 9 |
| 2305 | 2303 | 2306 | 2307 | 9 |
| 2305 | 2303 | 2306 | 2308 | 9 |
| 2305 | 2303 | 2306 | 2333 | 9 |
| 2303 | 2306 | 2308 | 2309 | 9 |
| 2303 | 2306 | 2308 | 2310 | 9 |
| 2303 | 2306 | 2308 | 2311 | 9 |
| 2307 | 2306 | 2308 | 2309 | 9 |
| 2307 | 2306 | 2308 | 2310 | 9 |
| 2307 | 2306 | 2308 | 2311 | 9 |
| 2333 | 2306 | 2308 | 2309 | 9 |
| 2333 | 2306 | 2308 | 2310 | 9 |
| 2333 | 2306 | 2308 | 2311 | 9 |
| 2303 | 2306 | 2333 | 2334 | 9 |
| 2303 | 2306 | 2333 | 2335 | 9 |
| 2303 | 2306 | 2333 | 2361 | 9 |
| 2307 | 2306 | 2333 | 2334 | 9 |
| 2307 | 2306 | 2333 | 2335 | 9 |
| 2307 | 2306 | 2333 | 2361 | 9 |
| 2308 | 2306 | 2333 | 2334 | 9 |
| 2308 | 2306 | 2333 | 2335 | 9 |
| 2308 | 2306 | 2333 | 2361 | 9 |
| 2306 | 2308 | 2311 | 2312 | 9 |
| 2306 | 2308 | 2311 | 2313 | 9 |
| 2306 | 2308 | 2311 | 2314 | 9 |
| 2309 | 2308 | 2311 | 2312 | 9 |
| 2309 | 2308 | 2311 | 2313 | 9 |

|      |      |      |      |   |
|------|------|------|------|---|
| 2309 | 2308 | 2311 | 2314 | 9 |
| 2310 | 2308 | 2311 | 2312 | 9 |
| 2310 | 2308 | 2311 | 2313 | 9 |
| 2310 | 2308 | 2311 | 2314 | 9 |
| 2308 | 2311 | 2314 | 2315 | 9 |
| 2308 | 2311 | 2314 | 2316 | 9 |
| 2308 | 2311 | 2314 | 2317 | 9 |
| 2312 | 2311 | 2314 | 2315 | 9 |
| 2312 | 2311 | 2314 | 2316 | 9 |
| 2312 | 2311 | 2314 | 2317 | 9 |
| 2313 | 2311 | 2314 | 2315 | 9 |
| 2313 | 2311 | 2314 | 2316 | 9 |
| 2313 | 2311 | 2314 | 2317 | 9 |
| 2311 | 2314 | 2317 | 2318 | 9 |
| 2311 | 2314 | 2317 | 2319 | 9 |
| 2311 | 2314 | 2317 | 2320 | 9 |
| 2315 | 2314 | 2317 | 2318 | 9 |
| 2315 | 2314 | 2317 | 2319 | 9 |
| 2315 | 2314 | 2317 | 2320 | 9 |
| 2316 | 2314 | 2317 | 2318 | 9 |
| 2316 | 2314 | 2317 | 2319 | 9 |
| 2316 | 2314 | 2317 | 2320 | 9 |
| 2314 | 2317 | 2320 | 2321 | 9 |
| 2314 | 2317 | 2320 | 2322 | 9 |
| 2314 | 2317 | 2320 | 2323 | 9 |
| 2318 | 2317 | 2320 | 2321 | 9 |
| 2318 | 2317 | 2320 | 2322 | 9 |
| 2318 | 2317 | 2320 | 2323 | 9 |
| 2319 | 2317 | 2320 | 2321 | 9 |
| 2319 | 2317 | 2320 | 2322 | 9 |
| 2319 | 2317 | 2320 | 2323 | 9 |
| 2317 | 2320 | 2323 | 2324 | 9 |
| 2317 | 2320 | 2323 | 2325 | 9 |
| 2317 | 2320 | 2323 | 2326 | 9 |
| 2321 | 2320 | 2323 | 2324 | 9 |
| 2321 | 2320 | 2323 | 2325 | 9 |
| 2321 | 2320 | 2323 | 2326 | 9 |
| 2322 | 2320 | 2323 | 2324 | 9 |
| 2322 | 2320 | 2323 | 2325 | 9 |
| 2322 | 2320 | 2323 | 2326 | 9 |
| 2320 | 2323 | 2326 | 2327 | 9 |
| 2320 | 2323 | 2326 | 2328 | 9 |
| 2320 | 2323 | 2326 | 2329 | 9 |
| 2324 | 2323 | 2326 | 2327 | 9 |
| 2324 | 2323 | 2326 | 2328 | 9 |
| 2324 | 2323 | 2326 | 2329 | 9 |
| 2325 | 2323 | 2326 | 2327 | 9 |
| 2325 | 2323 | 2326 | 2328 | 9 |
| 2325 | 2323 | 2326 | 2329 | 9 |
| 2323 | 2326 | 2329 | 2330 | 9 |
| 2323 | 2326 | 2329 | 2331 | 9 |
| 2323 | 2326 | 2329 | 2332 | 9 |
| 2327 | 2326 | 2329 | 2330 | 9 |
| 2327 | 2326 | 2329 | 2331 | 9 |

|      |      |      |      |   |
|------|------|------|------|---|
| 2327 | 2326 | 2329 | 2332 | 9 |
| 2328 | 2326 | 2329 | 2330 | 9 |
| 2328 | 2326 | 2329 | 2331 | 9 |
| 2328 | 2326 | 2329 | 2332 | 9 |
| 2306 | 2333 | 2335 | 2336 | 9 |
| 2306 | 2333 | 2335 | 2337 | 9 |
| 2334 | 2333 | 2335 | 2336 | 9 |
| 2334 | 2333 | 2335 | 2337 | 9 |
| 2361 | 2333 | 2335 | 2336 | 9 |
| 2361 | 2333 | 2335 | 2337 | 9 |
| 2306 | 2333 | 2361 | 2362 | 9 |
| 2306 | 2333 | 2361 | 2363 | 9 |
| 2306 | 2333 | 2361 | 2366 | 9 |
| 2334 | 2333 | 2361 | 2362 | 9 |
| 2334 | 2333 | 2361 | 2363 | 9 |
| 2334 | 2333 | 2361 | 2366 | 9 |
| 2335 | 2333 | 2361 | 2362 | 9 |
| 2335 | 2333 | 2361 | 2363 | 9 |
| 2335 | 2333 | 2361 | 2366 | 9 |
| 2333 | 2335 | 2337 | 2338 | 9 |
| 2333 | 2335 | 2337 | 2339 | 9 |
| 2336 | 2335 | 2337 | 2338 | 9 |
| 2336 | 2335 | 2337 | 2339 | 9 |
| 2335 | 2337 | 2339 | 2340 | 9 |
| 2335 | 2337 | 2339 | 2341 | 9 |
| 2335 | 2337 | 2339 | 2342 | 9 |
| 2338 | 2337 | 2339 | 2340 | 9 |
| 2338 | 2337 | 2339 | 2341 | 9 |
| 2338 | 2337 | 2339 | 2342 | 9 |
| 2337 | 2339 | 2342 | 2343 | 9 |
| 2337 | 2339 | 2342 | 2344 | 9 |
| 2337 | 2339 | 2342 | 2345 | 9 |
| 2340 | 2339 | 2342 | 2343 | 9 |
| 2340 | 2339 | 2342 | 2344 | 9 |
| 2340 | 2339 | 2342 | 2345 | 9 |
| 2341 | 2339 | 2342 | 2343 | 9 |
| 2341 | 2339 | 2342 | 2344 | 9 |
| 2341 | 2339 | 2342 | 2345 | 9 |
| 2339 | 2342 | 2345 | 2346 | 9 |
| 2339 | 2342 | 2345 | 2347 | 9 |
| 2339 | 2342 | 2345 | 2348 | 9 |
| 2343 | 2342 | 2345 | 2346 | 9 |
| 2343 | 2342 | 2345 | 2347 | 9 |
| 2343 | 2342 | 2345 | 2348 | 9 |
| 2344 | 2342 | 2345 | 2346 | 9 |
| 2344 | 2342 | 2345 | 2347 | 9 |
| 2344 | 2342 | 2345 | 2348 | 9 |
| 2342 | 2345 | 2348 | 2349 | 9 |
| 2342 | 2345 | 2348 | 2353 | 9 |
| 2342 | 2345 | 2348 | 2357 | 9 |
| 2346 | 2345 | 2348 | 2349 | 9 |
| 2346 | 2345 | 2348 | 2353 | 9 |
| 2346 | 2345 | 2348 | 2357 | 9 |
| 2347 | 2345 | 2348 | 2349 | 9 |

|      |      |      |      |   |
|------|------|------|------|---|
| 2347 | 2345 | 2348 | 2353 | 9 |
| 2347 | 2345 | 2348 | 2357 | 9 |
| 2345 | 2348 | 2349 | 2350 | 9 |
| 2345 | 2348 | 2349 | 2351 | 9 |
| 2345 | 2348 | 2349 | 2352 | 9 |
| 2353 | 2348 | 2349 | 2350 | 9 |
| 2353 | 2348 | 2349 | 2351 | 9 |
| 2353 | 2348 | 2349 | 2352 | 9 |
| 2357 | 2348 | 2349 | 2350 | 9 |
| 2357 | 2348 | 2349 | 2351 | 9 |
| 2357 | 2348 | 2349 | 2352 | 9 |
| 2345 | 2348 | 2353 | 2354 | 9 |
| 2345 | 2348 | 2353 | 2355 | 9 |
| 2345 | 2348 | 2353 | 2356 | 9 |
| 2349 | 2348 | 2353 | 2354 | 9 |
| 2349 | 2348 | 2353 | 2355 | 9 |
| 2349 | 2348 | 2353 | 2356 | 9 |
| 2357 | 2348 | 2353 | 2354 | 9 |
| 2357 | 2348 | 2353 | 2355 | 9 |
| 2357 | 2348 | 2353 | 2356 | 9 |
| 2345 | 2348 | 2357 | 2358 | 9 |
| 2345 | 2348 | 2357 | 2359 | 9 |
| 2345 | 2348 | 2357 | 2360 | 9 |
| 2349 | 2348 | 2357 | 2358 | 9 |
| 2349 | 2348 | 2357 | 2359 | 9 |
| 2349 | 2348 | 2357 | 2360 | 9 |
| 2353 | 2348 | 2357 | 2358 | 9 |
| 2353 | 2348 | 2357 | 2359 | 9 |
| 2353 | 2348 | 2357 | 2360 | 9 |
| 2333 | 2361 | 2363 | 2364 | 9 |
| 2333 | 2361 | 2363 | 2365 | 9 |
| 2362 | 2361 | 2363 | 2364 | 9 |
| 2362 | 2361 | 2363 | 2365 | 9 |
| 2366 | 2361 | 2363 | 2364 | 9 |
| 2366 | 2361 | 2363 | 2365 | 9 |
| 2333 | 2361 | 2366 | 2367 | 9 |
| 2333 | 2361 | 2366 | 2368 | 9 |
| 2333 | 2361 | 2366 | 2369 | 9 |
| 2362 | 2361 | 2366 | 2367 | 9 |
| 2362 | 2361 | 2366 | 2368 | 9 |
| 2362 | 2361 | 2366 | 2369 | 9 |
| 2363 | 2361 | 2366 | 2367 | 9 |
| 2363 | 2361 | 2366 | 2368 | 9 |
| 2363 | 2361 | 2366 | 2369 | 9 |
| 2361 | 2366 | 2369 | 2370 | 9 |
| 2361 | 2366 | 2369 | 2371 | 9 |
| 2361 | 2366 | 2369 | 2396 | 9 |
| 2367 | 2366 | 2369 | 2370 | 9 |
| 2367 | 2366 | 2369 | 2371 | 9 |
| 2367 | 2366 | 2369 | 2396 | 9 |
| 2368 | 2366 | 2369 | 2370 | 9 |
| 2368 | 2366 | 2369 | 2371 | 9 |
| 2368 | 2366 | 2369 | 2396 | 9 |
| 2366 | 2369 | 2371 | 2372 | 9 |

|      |      |      |      |   |
|------|------|------|------|---|
| 2366 | 2369 | 2371 | 2373 | 9 |
| 2366 | 2369 | 2371 | 2374 | 9 |
| 2370 | 2369 | 2371 | 2372 | 9 |
| 2370 | 2369 | 2371 | 2373 | 9 |
| 2370 | 2369 | 2371 | 2374 | 9 |
| 2396 | 2369 | 2371 | 2372 | 9 |
| 2396 | 2369 | 2371 | 2373 | 9 |
| 2396 | 2369 | 2371 | 2374 | 9 |
| 2366 | 2369 | 2396 | 2397 | 9 |
| 2366 | 2369 | 2396 | 2398 | 9 |
| 2366 | 2369 | 2396 | 2424 | 9 |
| 2370 | 2369 | 2396 | 2397 | 9 |
| 2370 | 2369 | 2396 | 2398 | 9 |
| 2370 | 2369 | 2396 | 2424 | 9 |
| 2371 | 2369 | 2396 | 2397 | 9 |
| 2371 | 2369 | 2396 | 2398 | 9 |
| 2371 | 2369 | 2396 | 2424 | 9 |
| 2369 | 2371 | 2374 | 2375 | 9 |
| 2369 | 2371 | 2374 | 2376 | 9 |
| 2369 | 2371 | 2374 | 2377 | 9 |
| 2372 | 2371 | 2374 | 2375 | 9 |
| 2372 | 2371 | 2374 | 2376 | 9 |
| 2372 | 2371 | 2374 | 2377 | 9 |
| 2373 | 2371 | 2374 | 2375 | 9 |
| 2373 | 2371 | 2374 | 2376 | 9 |
| 2373 | 2371 | 2374 | 2377 | 9 |
| 2371 | 2374 | 2377 | 2378 | 9 |
| 2371 | 2374 | 2377 | 2379 | 9 |
| 2371 | 2374 | 2377 | 2380 | 9 |
| 2375 | 2374 | 2377 | 2378 | 9 |
| 2375 | 2374 | 2377 | 2379 | 9 |
| 2375 | 2374 | 2377 | 2380 | 9 |
| 2376 | 2374 | 2377 | 2378 | 9 |
| 2376 | 2374 | 2377 | 2379 | 9 |
| 2376 | 2374 | 2377 | 2380 | 9 |
| 2374 | 2377 | 2380 | 2381 | 9 |
| 2374 | 2377 | 2380 | 2382 | 9 |
| 2374 | 2377 | 2380 | 2383 | 9 |
| 2378 | 2377 | 2380 | 2381 | 9 |
| 2378 | 2377 | 2380 | 2382 | 9 |
| 2378 | 2377 | 2380 | 2383 | 9 |
| 2379 | 2377 | 2380 | 2381 | 9 |
| 2379 | 2377 | 2380 | 2382 | 9 |
| 2379 | 2377 | 2380 | 2383 | 9 |
| 2377 | 2380 | 2383 | 2384 | 9 |
| 2377 | 2380 | 2383 | 2385 | 9 |
| 2377 | 2380 | 2383 | 2386 | 9 |
| 2381 | 2380 | 2383 | 2384 | 9 |
| 2381 | 2380 | 2383 | 2385 | 9 |
| 2381 | 2380 | 2383 | 2386 | 9 |
| 2382 | 2380 | 2383 | 2384 | 9 |
| 2382 | 2380 | 2383 | 2385 | 9 |
| 2382 | 2380 | 2383 | 2386 | 9 |
| 2380 | 2383 | 2386 | 2387 | 9 |



|      |      |      |      |   |
|------|------|------|------|---|
| 2380 | 2383 | 2386 | 2388 | 9 |
| 2380 | 2383 | 2386 | 2389 | 9 |
| 2384 | 2383 | 2386 | 2387 | 9 |
| 2384 | 2383 | 2386 | 2388 | 9 |
| 2384 | 2383 | 2386 | 2389 | 9 |
| 2385 | 2383 | 2386 | 2387 | 9 |
| 2385 | 2383 | 2386 | 2388 | 9 |
| 2385 | 2383 | 2386 | 2389 | 9 |
| 2383 | 2386 | 2389 | 2390 | 9 |
| 2383 | 2386 | 2389 | 2391 | 9 |
| 2383 | 2386 | 2389 | 2392 | 9 |
| 2387 | 2386 | 2389 | 2390 | 9 |
| 2387 | 2386 | 2389 | 2391 | 9 |
| 2387 | 2386 | 2389 | 2392 | 9 |
| 2388 | 2386 | 2389 | 2390 | 9 |
| 2388 | 2386 | 2389 | 2391 | 9 |
| 2388 | 2386 | 2389 | 2392 | 9 |
| 2386 | 2389 | 2392 | 2393 | 9 |
| 2386 | 2389 | 2392 | 2394 | 9 |
| 2386 | 2389 | 2392 | 2395 | 9 |
| 2390 | 2389 | 2392 | 2393 | 9 |
| 2390 | 2389 | 2392 | 2394 | 9 |
| 2390 | 2389 | 2392 | 2395 | 9 |
| 2391 | 2389 | 2392 | 2393 | 9 |
| 2391 | 2389 | 2392 | 2394 | 9 |
| 2391 | 2389 | 2392 | 2395 | 9 |
| 2369 | 2396 | 2398 | 2399 | 9 |
| 2369 | 2396 | 2398 | 2400 | 9 |
| 2397 | 2396 | 2398 | 2399 | 9 |
| 2397 | 2396 | 2398 | 2400 | 9 |
| 2424 | 2396 | 2398 | 2399 | 9 |
| 2424 | 2396 | 2398 | 2400 | 9 |
| 2369 | 2396 | 2424 | 2425 | 9 |
| 2369 | 2396 | 2424 | 2426 | 9 |
| 2369 | 2396 | 2424 | 2429 | 9 |
| 2397 | 2396 | 2424 | 2425 | 9 |
| 2397 | 2396 | 2424 | 2426 | 9 |
| 2397 | 2396 | 2424 | 2429 | 9 |
| 2398 | 2396 | 2424 | 2425 | 9 |
| 2398 | 2396 | 2424 | 2426 | 9 |
| 2398 | 2396 | 2424 | 2429 | 9 |
| 2396 | 2398 | 2400 | 2401 | 9 |
| 2396 | 2398 | 2400 | 2402 | 9 |
| 2399 | 2398 | 2400 | 2401 | 9 |
| 2399 | 2398 | 2400 | 2402 | 9 |
| 2398 | 2400 | 2402 | 2403 | 9 |
| 2398 | 2400 | 2402 | 2404 | 9 |
| 2398 | 2400 | 2402 | 2405 | 9 |
| 2401 | 2400 | 2402 | 2403 | 9 |
| 2401 | 2400 | 2402 | 2404 | 9 |
| 2401 | 2400 | 2402 | 2405 | 9 |
| 2400 | 2402 | 2405 | 2406 | 9 |
| 2400 | 2402 | 2405 | 2407 | 9 |
| 2400 | 2402 | 2405 | 2408 | 9 |

|      |      |      |      |   |
|------|------|------|------|---|
| 2403 | 2402 | 2405 | 2406 | 9 |
| 2403 | 2402 | 2405 | 2407 | 9 |
| 2403 | 2402 | 2405 | 2408 | 9 |
| 2404 | 2402 | 2405 | 2406 | 9 |
| 2404 | 2402 | 2405 | 2407 | 9 |
| 2404 | 2402 | 2405 | 2408 | 9 |
| 2402 | 2405 | 2408 | 2409 | 9 |
| 2402 | 2405 | 2408 | 2410 | 9 |
| 2402 | 2405 | 2408 | 2411 | 9 |
| 2406 | 2405 | 2408 | 2409 | 9 |
| 2406 | 2405 | 2408 | 2410 | 9 |
| 2406 | 2405 | 2408 | 2411 | 9 |
| 2407 | 2405 | 2408 | 2409 | 9 |
| 2407 | 2405 | 2408 | 2410 | 9 |
| 2407 | 2405 | 2408 | 2411 | 9 |
| 2405 | 2408 | 2411 | 2412 | 9 |
| 2405 | 2408 | 2411 | 2416 | 9 |
| 2405 | 2408 | 2411 | 2420 | 9 |
| 2409 | 2408 | 2411 | 2412 | 9 |
| 2409 | 2408 | 2411 | 2416 | 9 |
| 2409 | 2408 | 2411 | 2420 | 9 |
| 2410 | 2408 | 2411 | 2412 | 9 |
| 2410 | 2408 | 2411 | 2416 | 9 |
| 2410 | 2408 | 2411 | 2420 | 9 |
| 2408 | 2411 | 2412 | 2413 | 9 |
| 2408 | 2411 | 2412 | 2414 | 9 |
| 2408 | 2411 | 2412 | 2415 | 9 |
| 2416 | 2411 | 2412 | 2413 | 9 |
| 2416 | 2411 | 2412 | 2414 | 9 |
| 2416 | 2411 | 2412 | 2415 | 9 |
| 2420 | 2411 | 2412 | 2413 | 9 |
| 2420 | 2411 | 2412 | 2414 | 9 |
| 2420 | 2411 | 2412 | 2415 | 9 |
| 2408 | 2411 | 2416 | 2417 | 9 |
| 2408 | 2411 | 2416 | 2418 | 9 |
| 2408 | 2411 | 2416 | 2419 | 9 |
| 2412 | 2411 | 2416 | 2417 | 9 |
| 2412 | 2411 | 2416 | 2418 | 9 |
| 2412 | 2411 | 2416 | 2419 | 9 |
| 2420 | 2411 | 2416 | 2417 | 9 |
| 2420 | 2411 | 2416 | 2418 | 9 |
| 2420 | 2411 | 2416 | 2419 | 9 |
| 2408 | 2411 | 2420 | 2421 | 9 |
| 2408 | 2411 | 2420 | 2422 | 9 |
| 2408 | 2411 | 2420 | 2423 | 9 |
| 2412 | 2411 | 2420 | 2421 | 9 |
| 2412 | 2411 | 2420 | 2422 | 9 |
| 2412 | 2411 | 2420 | 2423 | 9 |
| 2416 | 2411 | 2420 | 2421 | 9 |
| 2416 | 2411 | 2420 | 2422 | 9 |
| 2416 | 2411 | 2420 | 2423 | 9 |
| 2396 | 2424 | 2426 | 2427 | 9 |
| 2396 | 2424 | 2426 | 2428 | 9 |
| 2425 | 2424 | 2426 | 2427 | 9 |

|      |      |      |      |   |
|------|------|------|------|---|
| 2425 | 2424 | 2426 | 2428 | 9 |
| 2429 | 2424 | 2426 | 2427 | 9 |
| 2429 | 2424 | 2426 | 2428 | 9 |
| 2396 | 2424 | 2429 | 2430 | 9 |
| 2396 | 2424 | 2429 | 2431 | 9 |
| 2396 | 2424 | 2429 | 2432 | 9 |
| 2425 | 2424 | 2429 | 2430 | 9 |
| 2425 | 2424 | 2429 | 2431 | 9 |
| 2425 | 2424 | 2429 | 2432 | 9 |
| 2426 | 2424 | 2429 | 2430 | 9 |
| 2426 | 2424 | 2429 | 2431 | 9 |
| 2426 | 2424 | 2429 | 2432 | 9 |
| 2424 | 2429 | 2432 | 2433 | 9 |
| 2424 | 2429 | 2432 | 2434 | 9 |
| 2424 | 2429 | 2432 | 2459 | 9 |
| 2430 | 2429 | 2432 | 2433 | 9 |
| 2430 | 2429 | 2432 | 2434 | 9 |
| 2430 | 2429 | 2432 | 2459 | 9 |
| 2431 | 2429 | 2432 | 2433 | 9 |
| 2431 | 2429 | 2432 | 2434 | 9 |
| 2431 | 2429 | 2432 | 2459 | 9 |
| 2429 | 2432 | 2434 | 2435 | 9 |
| 2429 | 2432 | 2434 | 2436 | 9 |
| 2429 | 2432 | 2434 | 2437 | 9 |
| 2433 | 2432 | 2434 | 2435 | 9 |
| 2433 | 2432 | 2434 | 2436 | 9 |
| 2433 | 2432 | 2434 | 2437 | 9 |
| 2459 | 2432 | 2434 | 2435 | 9 |
| 2459 | 2432 | 2434 | 2436 | 9 |
| 2459 | 2432 | 2434 | 2437 | 9 |
| 2429 | 2432 | 2459 | 2460 | 9 |
| 2429 | 2432 | 2459 | 2461 | 9 |
| 2429 | 2432 | 2459 | 2487 | 9 |
| 2433 | 2432 | 2459 | 2460 | 9 |
| 2433 | 2432 | 2459 | 2461 | 9 |
| 2433 | 2432 | 2459 | 2487 | 9 |
| 2434 | 2432 | 2459 | 2460 | 9 |
| 2434 | 2432 | 2459 | 2461 | 9 |
| 2434 | 2432 | 2459 | 2487 | 9 |
| 2432 | 2434 | 2437 | 2438 | 9 |
| 2432 | 2434 | 2437 | 2439 | 9 |
| 2432 | 2434 | 2437 | 2440 | 9 |
| 2435 | 2434 | 2437 | 2438 | 9 |
| 2435 | 2434 | 2437 | 2439 | 9 |
| 2435 | 2434 | 2437 | 2440 | 9 |
| 2436 | 2434 | 2437 | 2438 | 9 |
| 2436 | 2434 | 2437 | 2439 | 9 |
| 2436 | 2434 | 2437 | 2440 | 9 |
| 2434 | 2437 | 2440 | 2441 | 9 |
| 2434 | 2437 | 2440 | 2442 | 9 |
| 2434 | 2437 | 2440 | 2443 | 9 |
| 2438 | 2437 | 2440 | 2441 | 9 |
| 2438 | 2437 | 2440 | 2442 | 9 |
| 2438 | 2437 | 2440 | 2443 | 9 |

|      |      |      |      |   |
|------|------|------|------|---|
| 2439 | 2437 | 2440 | 2441 | 9 |
| 2439 | 2437 | 2440 | 2442 | 9 |
| 2439 | 2437 | 2440 | 2443 | 9 |
| 2437 | 2440 | 2443 | 2444 | 9 |
| 2437 | 2440 | 2443 | 2445 | 9 |
| 2437 | 2440 | 2443 | 2446 | 9 |
| 2441 | 2440 | 2443 | 2444 | 9 |
| 2441 | 2440 | 2443 | 2445 | 9 |
| 2441 | 2440 | 2443 | 2446 | 9 |
| 2442 | 2440 | 2443 | 2444 | 9 |
| 2442 | 2440 | 2443 | 2445 | 9 |
| 2442 | 2440 | 2443 | 2446 | 9 |
| 2440 | 2443 | 2446 | 2447 | 9 |
| 2440 | 2443 | 2446 | 2448 | 9 |
| 2440 | 2443 | 2446 | 2449 | 9 |
| 2444 | 2443 | 2446 | 2447 | 9 |
| 2444 | 2443 | 2446 | 2448 | 9 |
| 2444 | 2443 | 2446 | 2449 | 9 |
| 2445 | 2443 | 2446 | 2447 | 9 |
| 2445 | 2443 | 2446 | 2448 | 9 |
| 2445 | 2443 | 2446 | 2449 | 9 |
| 2443 | 2446 | 2449 | 2450 | 9 |
| 2443 | 2446 | 2449 | 2451 | 9 |
| 2443 | 2446 | 2449 | 2452 | 9 |
| 2447 | 2446 | 2449 | 2450 | 9 |
| 2447 | 2446 | 2449 | 2451 | 9 |
| 2447 | 2446 | 2449 | 2452 | 9 |
| 2448 | 2446 | 2449 | 2450 | 9 |
| 2448 | 2446 | 2449 | 2451 | 9 |
| 2448 | 2446 | 2449 | 2452 | 9 |
| 2446 | 2449 | 2452 | 2453 | 9 |
| 2446 | 2449 | 2452 | 2454 | 9 |
| 2446 | 2449 | 2452 | 2455 | 9 |
| 2450 | 2449 | 2452 | 2453 | 9 |
| 2450 | 2449 | 2452 | 2454 | 9 |
| 2450 | 2449 | 2452 | 2455 | 9 |
| 2451 | 2449 | 2452 | 2453 | 9 |
| 2451 | 2449 | 2452 | 2454 | 9 |
| 2451 | 2449 | 2452 | 2455 | 9 |
| 2449 | 2452 | 2455 | 2456 | 9 |
| 2449 | 2452 | 2455 | 2457 | 9 |
| 2449 | 2452 | 2455 | 2458 | 9 |
| 2453 | 2452 | 2455 | 2456 | 9 |
| 2453 | 2452 | 2455 | 2457 | 9 |
| 2453 | 2452 | 2455 | 2458 | 9 |
| 2454 | 2452 | 2455 | 2456 | 9 |
| 2454 | 2452 | 2455 | 2457 | 9 |
| 2454 | 2452 | 2455 | 2458 | 9 |
| 2432 | 2459 | 2461 | 2462 | 9 |
| 2432 | 2459 | 2461 | 2463 | 9 |
| 2460 | 2459 | 2461 | 2462 | 9 |
| 2460 | 2459 | 2461 | 2463 | 9 |
| 2487 | 2459 | 2461 | 2462 | 9 |
| 2487 | 2459 | 2461 | 2463 | 9 |

|      |      |      |      |   |
|------|------|------|------|---|
| 2432 | 2459 | 2487 | 2488 | 9 |
| 2432 | 2459 | 2487 | 2489 | 9 |
| 2432 | 2459 | 2487 | 2492 | 9 |
| 2460 | 2459 | 2487 | 2488 | 9 |
| 2460 | 2459 | 2487 | 2489 | 9 |
| 2460 | 2459 | 2487 | 2492 | 9 |
| 2461 | 2459 | 2487 | 2488 | 9 |
| 2461 | 2459 | 2487 | 2489 | 9 |
| 2461 | 2459 | 2487 | 2492 | 9 |
| 2459 | 2461 | 2463 | 2464 | 9 |
| 2459 | 2461 | 2463 | 2465 | 9 |
| 2462 | 2461 | 2463 | 2464 | 9 |
| 2462 | 2461 | 2463 | 2465 | 9 |
| 2461 | 2463 | 2465 | 2466 | 9 |
| 2461 | 2463 | 2465 | 2467 | 9 |
| 2461 | 2463 | 2465 | 2468 | 9 |
| 2464 | 2463 | 2465 | 2466 | 9 |
| 2464 | 2463 | 2465 | 2467 | 9 |
| 2464 | 2463 | 2465 | 2468 | 9 |
| 2463 | 2465 | 2468 | 2469 | 9 |
| 2463 | 2465 | 2468 | 2470 | 9 |
| 2463 | 2465 | 2468 | 2471 | 9 |
| 2466 | 2465 | 2468 | 2469 | 9 |
| 2466 | 2465 | 2468 | 2470 | 9 |
| 2466 | 2465 | 2468 | 2471 | 9 |
| 2467 | 2465 | 2468 | 2469 | 9 |
| 2467 | 2465 | 2468 | 2470 | 9 |
| 2467 | 2465 | 2468 | 2471 | 9 |
| 2465 | 2468 | 2471 | 2472 | 9 |
| 2465 | 2468 | 2471 | 2473 | 9 |
| 2465 | 2468 | 2471 | 2474 | 9 |
| 2469 | 2468 | 2471 | 2472 | 9 |
| 2469 | 2468 | 2471 | 2473 | 9 |
| 2469 | 2468 | 2471 | 2474 | 9 |
| 2470 | 2468 | 2471 | 2472 | 9 |
| 2470 | 2468 | 2471 | 2473 | 9 |
| 2470 | 2468 | 2471 | 2474 | 9 |
| 2468 | 2471 | 2474 | 2475 | 9 |
| 2468 | 2471 | 2474 | 2479 | 9 |
| 2468 | 2471 | 2474 | 2483 | 9 |
| 2472 | 2471 | 2474 | 2475 | 9 |
| 2472 | 2471 | 2474 | 2479 | 9 |
| 2472 | 2471 | 2474 | 2483 | 9 |
| 2473 | 2471 | 2474 | 2475 | 9 |
| 2473 | 2471 | 2474 | 2479 | 9 |
| 2473 | 2471 | 2474 | 2483 | 9 |
| 2471 | 2474 | 2475 | 2476 | 9 |
| 2471 | 2474 | 2475 | 2477 | 9 |
| 2471 | 2474 | 2475 | 2478 | 9 |
| 2479 | 2474 | 2475 | 2476 | 9 |
| 2479 | 2474 | 2475 | 2477 | 9 |
| 2479 | 2474 | 2475 | 2478 | 9 |
| 2483 | 2474 | 2475 | 2476 | 9 |
| 2483 | 2474 | 2475 | 2477 | 9 |

|      |      |      |      |   |
|------|------|------|------|---|
| 2483 | 2474 | 2475 | 2478 | 9 |
| 2471 | 2474 | 2479 | 2480 | 9 |
| 2471 | 2474 | 2479 | 2481 | 9 |
| 2471 | 2474 | 2479 | 2482 | 9 |
| 2475 | 2474 | 2479 | 2480 | 9 |
| 2475 | 2474 | 2479 | 2481 | 9 |
| 2475 | 2474 | 2479 | 2482 | 9 |
| 2483 | 2474 | 2479 | 2480 | 9 |
| 2483 | 2474 | 2479 | 2481 | 9 |
| 2483 | 2474 | 2479 | 2482 | 9 |
| 2471 | 2474 | 2483 | 2484 | 9 |
| 2471 | 2474 | 2483 | 2485 | 9 |
| 2471 | 2474 | 2483 | 2486 | 9 |
| 2475 | 2474 | 2483 | 2484 | 9 |
| 2475 | 2474 | 2483 | 2485 | 9 |
| 2475 | 2474 | 2483 | 2486 | 9 |
| 2479 | 2474 | 2483 | 2484 | 9 |
| 2479 | 2474 | 2483 | 2485 | 9 |
| 2479 | 2474 | 2483 | 2486 | 9 |
| 2459 | 2487 | 2489 | 2490 | 9 |
| 2459 | 2487 | 2489 | 2491 | 9 |
| 2488 | 2487 | 2489 | 2490 | 9 |
| 2488 | 2487 | 2489 | 2491 | 9 |
| 2492 | 2487 | 2489 | 2490 | 9 |
| 2492 | 2487 | 2489 | 2491 | 9 |
| 2459 | 2487 | 2492 | 2493 | 9 |
| 2459 | 2487 | 2492 | 2494 | 9 |
| 2459 | 2487 | 2492 | 2495 | 9 |
| 2488 | 2487 | 2492 | 2493 | 9 |
| 2488 | 2487 | 2492 | 2494 | 9 |
| 2488 | 2487 | 2492 | 2495 | 9 |
| 2489 | 2487 | 2492 | 2493 | 9 |
| 2489 | 2487 | 2492 | 2494 | 9 |
| 2489 | 2487 | 2492 | 2495 | 9 |
| 2487 | 2492 | 2495 | 2496 | 9 |
| 2487 | 2492 | 2495 | 2497 | 9 |
| 2487 | 2492 | 2495 | 2522 | 9 |
| 2493 | 2492 | 2495 | 2496 | 9 |
| 2493 | 2492 | 2495 | 2497 | 9 |
| 2493 | 2492 | 2495 | 2522 | 9 |
| 2494 | 2492 | 2495 | 2496 | 9 |
| 2494 | 2492 | 2495 | 2497 | 9 |
| 2494 | 2492 | 2495 | 2522 | 9 |
| 2492 | 2495 | 2497 | 2498 | 9 |
| 2492 | 2495 | 2497 | 2499 | 9 |
| 2492 | 2495 | 2497 | 2500 | 9 |
| 2496 | 2495 | 2497 | 2498 | 9 |
| 2496 | 2495 | 2497 | 2499 | 9 |
| 2496 | 2495 | 2497 | 2500 | 9 |
| 2522 | 2495 | 2497 | 2498 | 9 |
| 2522 | 2495 | 2497 | 2499 | 9 |
| 2522 | 2495 | 2497 | 2500 | 9 |
| 2492 | 2495 | 2522 | 2523 | 9 |
| 2492 | 2495 | 2522 | 2524 | 9 |

|      |      |      |      |   |
|------|------|------|------|---|
| 2492 | 2495 | 2522 | 2550 | 9 |
| 2496 | 2495 | 2522 | 2523 | 9 |
| 2496 | 2495 | 2522 | 2524 | 9 |
| 2496 | 2495 | 2522 | 2550 | 9 |
| 2497 | 2495 | 2522 | 2523 | 9 |
| 2497 | 2495 | 2522 | 2524 | 9 |
| 2497 | 2495 | 2522 | 2550 | 9 |
| 2495 | 2497 | 2500 | 2501 | 9 |
| 2495 | 2497 | 2500 | 2502 | 9 |
| 2495 | 2497 | 2500 | 2503 | 9 |
| 2498 | 2497 | 2500 | 2501 | 9 |
| 2498 | 2497 | 2500 | 2502 | 9 |
| 2498 | 2497 | 2500 | 2503 | 9 |
| 2499 | 2497 | 2500 | 2501 | 9 |
| 2499 | 2497 | 2500 | 2502 | 9 |
| 2499 | 2497 | 2500 | 2503 | 9 |
| 2497 | 2500 | 2503 | 2504 | 9 |
| 2497 | 2500 | 2503 | 2505 | 9 |
| 2497 | 2500 | 2503 | 2506 | 9 |
| 2501 | 2500 | 2503 | 2504 | 9 |
| 2501 | 2500 | 2503 | 2505 | 9 |
| 2501 | 2500 | 2503 | 2506 | 9 |
| 2502 | 2500 | 2503 | 2504 | 9 |
| 2502 | 2500 | 2503 | 2505 | 9 |
| 2502 | 2500 | 2503 | 2506 | 9 |
| 2500 | 2503 | 2506 | 2507 | 9 |
| 2500 | 2503 | 2506 | 2508 | 9 |
| 2500 | 2503 | 2506 | 2509 | 9 |
| 2504 | 2503 | 2506 | 2507 | 9 |
| 2504 | 2503 | 2506 | 2508 | 9 |
| 2504 | 2503 | 2506 | 2509 | 9 |
| 2505 | 2503 | 2506 | 2507 | 9 |
| 2505 | 2503 | 2506 | 2508 | 9 |
| 2505 | 2503 | 2506 | 2509 | 9 |
| 2503 | 2506 | 2509 | 2510 | 9 |
| 2503 | 2506 | 2509 | 2511 | 9 |
| 2503 | 2506 | 2509 | 2512 | 9 |
| 2507 | 2506 | 2509 | 2510 | 9 |
| 2507 | 2506 | 2509 | 2511 | 9 |
| 2507 | 2506 | 2509 | 2512 | 9 |
| 2508 | 2506 | 2509 | 2510 | 9 |
| 2508 | 2506 | 2509 | 2511 | 9 |
| 2508 | 2506 | 2509 | 2512 | 9 |
| 2506 | 2509 | 2512 | 2513 | 9 |
| 2506 | 2509 | 2512 | 2514 | 9 |
| 2506 | 2509 | 2512 | 2515 | 9 |
| 2510 | 2509 | 2512 | 2513 | 9 |
| 2510 | 2509 | 2512 | 2514 | 9 |
| 2510 | 2509 | 2512 | 2515 | 9 |
| 2511 | 2509 | 2512 | 2513 | 9 |
| 2511 | 2509 | 2512 | 2514 | 9 |
| 2511 | 2509 | 2512 | 2515 | 9 |
| 2509 | 2512 | 2515 | 2516 | 9 |
| 2509 | 2512 | 2515 | 2517 | 9 |

|      |      |      |      |   |
|------|------|------|------|---|
| 2509 | 2512 | 2515 | 2518 | 9 |
| 2513 | 2512 | 2515 | 2516 | 9 |
| 2513 | 2512 | 2515 | 2517 | 9 |
| 2513 | 2512 | 2515 | 2518 | 9 |
| 2514 | 2512 | 2515 | 2516 | 9 |
| 2514 | 2512 | 2515 | 2517 | 9 |
| 2514 | 2512 | 2515 | 2518 | 9 |
| 2512 | 2515 | 2518 | 2519 | 9 |
| 2512 | 2515 | 2518 | 2520 | 9 |
| 2512 | 2515 | 2518 | 2521 | 9 |
| 2516 | 2515 | 2518 | 2519 | 9 |
| 2516 | 2515 | 2518 | 2520 | 9 |
| 2516 | 2515 | 2518 | 2521 | 9 |
| 2517 | 2515 | 2518 | 2519 | 9 |
| 2517 | 2515 | 2518 | 2520 | 9 |
| 2517 | 2515 | 2518 | 2521 | 9 |
| 2495 | 2522 | 2524 | 2525 | 9 |
| 2495 | 2522 | 2524 | 2526 | 9 |
| 2523 | 2522 | 2524 | 2525 | 9 |
| 2523 | 2522 | 2524 | 2526 | 9 |
| 2550 | 2522 | 2524 | 2525 | 9 |
| 2550 | 2522 | 2524 | 2526 | 9 |
| 2495 | 2522 | 2550 | 2551 | 9 |
| 2495 | 2522 | 2550 | 2552 | 9 |
| 2495 | 2522 | 2550 | 2555 | 9 |
| 2523 | 2522 | 2550 | 2551 | 9 |
| 2523 | 2522 | 2550 | 2552 | 9 |
| 2523 | 2522 | 2550 | 2555 | 9 |
| 2524 | 2522 | 2550 | 2551 | 9 |
| 2524 | 2522 | 2550 | 2552 | 9 |
| 2524 | 2522 | 2550 | 2555 | 9 |
| 2522 | 2524 | 2526 | 2527 | 9 |
| 2522 | 2524 | 2526 | 2528 | 9 |
| 2525 | 2524 | 2526 | 2527 | 9 |
| 2525 | 2524 | 2526 | 2528 | 9 |
| 2524 | 2526 | 2528 | 2529 | 9 |
| 2524 | 2526 | 2528 | 2530 | 9 |
| 2524 | 2526 | 2528 | 2531 | 9 |
| 2527 | 2526 | 2528 | 2529 | 9 |
| 2527 | 2526 | 2528 | 2530 | 9 |
| 2527 | 2526 | 2528 | 2531 | 9 |
| 2526 | 2528 | 2531 | 2532 | 9 |
| 2526 | 2528 | 2531 | 2533 | 9 |
| 2526 | 2528 | 2531 | 2534 | 9 |
| 2529 | 2528 | 2531 | 2532 | 9 |
| 2529 | 2528 | 2531 | 2533 | 9 |
| 2529 | 2528 | 2531 | 2534 | 9 |
| 2530 | 2528 | 2531 | 2532 | 9 |
| 2530 | 2528 | 2531 | 2533 | 9 |
| 2530 | 2528 | 2531 | 2534 | 9 |
| 2528 | 2531 | 2534 | 2535 | 9 |
| 2528 | 2531 | 2534 | 2536 | 9 |
| 2528 | 2531 | 2534 | 2537 | 9 |
| 2532 | 2531 | 2534 | 2535 | 9 |



|      |      |      |      |   |
|------|------|------|------|---|
| 2532 | 2531 | 2534 | 2536 | 9 |
| 2532 | 2531 | 2534 | 2537 | 9 |
| 2533 | 2531 | 2534 | 2535 | 9 |
| 2533 | 2531 | 2534 | 2536 | 9 |
| 2533 | 2531 | 2534 | 2537 | 9 |
| 2531 | 2534 | 2537 | 2538 | 9 |
| 2531 | 2534 | 2537 | 2542 | 9 |
| 2531 | 2534 | 2537 | 2546 | 9 |
| 2535 | 2534 | 2537 | 2538 | 9 |
| 2535 | 2534 | 2537 | 2542 | 9 |
| 2535 | 2534 | 2537 | 2546 | 9 |
| 2536 | 2534 | 2537 | 2538 | 9 |
| 2536 | 2534 | 2537 | 2542 | 9 |
| 2536 | 2534 | 2537 | 2546 | 9 |
| 2534 | 2537 | 2538 | 2539 | 9 |
| 2534 | 2537 | 2538 | 2540 | 9 |
| 2534 | 2537 | 2538 | 2541 | 9 |
| 2542 | 2537 | 2538 | 2539 | 9 |
| 2542 | 2537 | 2538 | 2540 | 9 |
| 2542 | 2537 | 2538 | 2541 | 9 |
| 2546 | 2537 | 2538 | 2539 | 9 |
| 2546 | 2537 | 2538 | 2540 | 9 |
| 2546 | 2537 | 2538 | 2541 | 9 |
| 2534 | 2537 | 2542 | 2543 | 9 |
| 2534 | 2537 | 2542 | 2544 | 9 |
| 2534 | 2537 | 2542 | 2545 | 9 |
| 2538 | 2537 | 2542 | 2543 | 9 |
| 2538 | 2537 | 2542 | 2544 | 9 |
| 2538 | 2537 | 2542 | 2545 | 9 |
| 2546 | 2537 | 2542 | 2543 | 9 |
| 2546 | 2537 | 2542 | 2544 | 9 |
| 2546 | 2537 | 2542 | 2545 | 9 |
| 2534 | 2537 | 2546 | 2547 | 9 |
| 2534 | 2537 | 2546 | 2548 | 9 |
| 2534 | 2537 | 2546 | 2549 | 9 |
| 2538 | 2537 | 2546 | 2547 | 9 |
| 2538 | 2537 | 2546 | 2548 | 9 |
| 2538 | 2537 | 2546 | 2549 | 9 |
| 2542 | 2537 | 2546 | 2547 | 9 |
| 2542 | 2537 | 2546 | 2548 | 9 |
| 2542 | 2537 | 2546 | 2549 | 9 |
| 2522 | 2550 | 2552 | 2553 | 9 |
| 2522 | 2550 | 2552 | 2554 | 9 |
| 2551 | 2550 | 2552 | 2553 | 9 |
| 2551 | 2550 | 2552 | 2554 | 9 |
| 2555 | 2550 | 2552 | 2553 | 9 |
| 2555 | 2550 | 2552 | 2554 | 9 |
| 2522 | 2550 | 2555 | 2556 | 9 |
| 2522 | 2550 | 2555 | 2557 | 9 |
| 2522 | 2550 | 2555 | 2558 | 9 |
| 2551 | 2550 | 2555 | 2556 | 9 |
| 2551 | 2550 | 2555 | 2557 | 9 |
| 2551 | 2550 | 2555 | 2558 | 9 |
| 2552 | 2550 | 2555 | 2556 | 9 |

|      |      |      |      |   |
|------|------|------|------|---|
| 2552 | 2550 | 2555 | 2557 | 9 |
| 2552 | 2550 | 2555 | 2558 | 9 |
| 2550 | 2555 | 2558 | 2559 | 9 |
| 2550 | 2555 | 2558 | 2560 | 9 |
| 2550 | 2555 | 2558 | 2585 | 9 |
| 2556 | 2555 | 2558 | 2559 | 9 |
| 2556 | 2555 | 2558 | 2560 | 9 |
| 2556 | 2555 | 2558 | 2585 | 9 |
| 2557 | 2555 | 2558 | 2559 | 9 |
| 2557 | 2555 | 2558 | 2560 | 9 |
| 2557 | 2555 | 2558 | 2585 | 9 |
| 2555 | 2558 | 2560 | 2561 | 9 |
| 2555 | 2558 | 2560 | 2562 | 9 |
| 2555 | 2558 | 2560 | 2563 | 9 |
| 2559 | 2558 | 2560 | 2561 | 9 |
| 2559 | 2558 | 2560 | 2562 | 9 |
| 2559 | 2558 | 2560 | 2563 | 9 |
| 2585 | 2558 | 2560 | 2561 | 9 |
| 2585 | 2558 | 2560 | 2562 | 9 |
| 2585 | 2558 | 2560 | 2563 | 9 |
| 2555 | 2558 | 2585 | 2586 | 9 |
| 2555 | 2558 | 2585 | 2587 | 9 |
| 2555 | 2558 | 2585 | 2613 | 9 |
| 2559 | 2558 | 2585 | 2586 | 9 |
| 2559 | 2558 | 2585 | 2587 | 9 |
| 2559 | 2558 | 2585 | 2613 | 9 |
| 2560 | 2558 | 2585 | 2586 | 9 |
| 2560 | 2558 | 2585 | 2587 | 9 |
| 2560 | 2558 | 2585 | 2613 | 9 |
| 2558 | 2560 | 2563 | 2564 | 9 |
| 2558 | 2560 | 2563 | 2565 | 9 |
| 2558 | 2560 | 2563 | 2566 | 9 |
| 2561 | 2560 | 2563 | 2564 | 9 |
| 2561 | 2560 | 2563 | 2565 | 9 |
| 2561 | 2560 | 2563 | 2566 | 9 |
| 2562 | 2560 | 2563 | 2564 | 9 |
| 2562 | 2560 | 2563 | 2565 | 9 |
| 2562 | 2560 | 2563 | 2566 | 9 |
| 2560 | 2563 | 2566 | 2567 | 9 |
| 2560 | 2563 | 2566 | 2568 | 9 |
| 2560 | 2563 | 2566 | 2569 | 9 |
| 2564 | 2563 | 2566 | 2567 | 9 |
| 2564 | 2563 | 2566 | 2568 | 9 |
| 2564 | 2563 | 2566 | 2569 | 9 |
| 2565 | 2563 | 2566 | 2567 | 9 |
| 2565 | 2563 | 2566 | 2568 | 9 |
| 2565 | 2563 | 2566 | 2569 | 9 |
| 2563 | 2566 | 2569 | 2570 | 9 |
| 2563 | 2566 | 2569 | 2571 | 9 |
| 2563 | 2566 | 2569 | 2572 | 9 |
| 2567 | 2566 | 2569 | 2570 | 9 |
| 2567 | 2566 | 2569 | 2571 | 9 |
| 2567 | 2566 | 2569 | 2572 | 9 |
| 2568 | 2566 | 2569 | 2570 | 9 |

|      |      |      |      |   |
|------|------|------|------|---|
| 2568 | 2566 | 2569 | 2571 | 9 |
| 2568 | 2566 | 2569 | 2572 | 9 |
| 2566 | 2569 | 2572 | 2573 | 9 |
| 2566 | 2569 | 2572 | 2574 | 9 |
| 2566 | 2569 | 2572 | 2575 | 9 |
| 2570 | 2569 | 2572 | 2573 | 9 |
| 2570 | 2569 | 2572 | 2574 | 9 |
| 2570 | 2569 | 2572 | 2575 | 9 |
| 2571 | 2569 | 2572 | 2573 | 9 |
| 2571 | 2569 | 2572 | 2574 | 9 |
| 2571 | 2569 | 2572 | 2575 | 9 |
| 2569 | 2572 | 2575 | 2576 | 9 |
| 2569 | 2572 | 2575 | 2577 | 9 |
| 2569 | 2572 | 2575 | 2578 | 9 |
| 2573 | 2572 | 2575 | 2576 | 9 |
| 2573 | 2572 | 2575 | 2577 | 9 |
| 2573 | 2572 | 2575 | 2578 | 9 |
| 2574 | 2572 | 2575 | 2576 | 9 |
| 2574 | 2572 | 2575 | 2577 | 9 |
| 2574 | 2572 | 2575 | 2578 | 9 |
| 2572 | 2575 | 2578 | 2579 | 9 |
| 2572 | 2575 | 2578 | 2580 | 9 |
| 2572 | 2575 | 2578 | 2581 | 9 |
| 2576 | 2575 | 2578 | 2579 | 9 |
| 2576 | 2575 | 2578 | 2580 | 9 |
| 2576 | 2575 | 2578 | 2581 | 9 |
| 2577 | 2575 | 2578 | 2579 | 9 |
| 2577 | 2575 | 2578 | 2580 | 9 |
| 2577 | 2575 | 2578 | 2581 | 9 |
| 2575 | 2578 | 2581 | 2582 | 9 |
| 2575 | 2578 | 2581 | 2583 | 9 |
| 2575 | 2578 | 2581 | 2584 | 9 |
| 2579 | 2578 | 2581 | 2582 | 9 |
| 2579 | 2578 | 2581 | 2583 | 9 |
| 2579 | 2578 | 2581 | 2584 | 9 |
| 2580 | 2578 | 2581 | 2582 | 9 |
| 2580 | 2578 | 2581 | 2583 | 9 |
| 2580 | 2578 | 2581 | 2584 | 9 |
| 2558 | 2585 | 2587 | 2588 | 9 |
| 2558 | 2585 | 2587 | 2589 | 9 |
| 2586 | 2585 | 2587 | 2588 | 9 |
| 2586 | 2585 | 2587 | 2589 | 9 |
| 2613 | 2585 | 2587 | 2588 | 9 |
| 2613 | 2585 | 2587 | 2589 | 9 |
| 2558 | 2585 | 2613 | 2614 | 9 |
| 2558 | 2585 | 2613 | 2615 | 9 |
| 2558 | 2585 | 2613 | 2618 | 9 |
| 2586 | 2585 | 2613 | 2614 | 9 |
| 2586 | 2585 | 2613 | 2615 | 9 |
| 2586 | 2585 | 2613 | 2618 | 9 |
| 2587 | 2585 | 2613 | 2614 | 9 |
| 2587 | 2585 | 2613 | 2615 | 9 |
| 2587 | 2585 | 2613 | 2618 | 9 |
| 2585 | 2587 | 2589 | 2590 | 9 |

|      |      |      |      |   |
|------|------|------|------|---|
| 2585 | 2587 | 2589 | 2591 | 9 |
| 2588 | 2587 | 2589 | 2590 | 9 |
| 2588 | 2587 | 2589 | 2591 | 9 |
| 2587 | 2589 | 2591 | 2592 | 9 |
| 2587 | 2589 | 2591 | 2593 | 9 |
| 2587 | 2589 | 2591 | 2594 | 9 |
| 2590 | 2589 | 2591 | 2592 | 9 |
| 2590 | 2589 | 2591 | 2593 | 9 |
| 2590 | 2589 | 2591 | 2594 | 9 |
| 2589 | 2591 | 2594 | 2595 | 9 |
| 2589 | 2591 | 2594 | 2596 | 9 |
| 2589 | 2591 | 2594 | 2597 | 9 |
| 2592 | 2591 | 2594 | 2595 | 9 |
| 2592 | 2591 | 2594 | 2596 | 9 |
| 2592 | 2591 | 2594 | 2597 | 9 |
| 2593 | 2591 | 2594 | 2595 | 9 |
| 2593 | 2591 | 2594 | 2596 | 9 |
| 2593 | 2591 | 2594 | 2597 | 9 |
| 2591 | 2594 | 2597 | 2598 | 9 |
| 2591 | 2594 | 2597 | 2599 | 9 |
| 2591 | 2594 | 2597 | 2600 | 9 |
| 2595 | 2594 | 2597 | 2598 | 9 |
| 2595 | 2594 | 2597 | 2599 | 9 |
| 2595 | 2594 | 2597 | 2600 | 9 |
| 2596 | 2594 | 2597 | 2598 | 9 |
| 2596 | 2594 | 2597 | 2599 | 9 |
| 2596 | 2594 | 2597 | 2600 | 9 |
| 2594 | 2597 | 2600 | 2601 | 9 |
| 2594 | 2597 | 2600 | 2605 | 9 |
| 2594 | 2597 | 2600 | 2609 | 9 |
| 2598 | 2597 | 2600 | 2601 | 9 |
| 2598 | 2597 | 2600 | 2605 | 9 |
| 2598 | 2597 | 2600 | 2609 | 9 |
| 2599 | 2597 | 2600 | 2601 | 9 |
| 2599 | 2597 | 2600 | 2605 | 9 |
| 2599 | 2597 | 2600 | 2609 | 9 |
| 2597 | 2600 | 2601 | 2602 | 9 |
| 2597 | 2600 | 2601 | 2603 | 9 |
| 2597 | 2600 | 2601 | 2604 | 9 |
| 2605 | 2600 | 2601 | 2602 | 9 |
| 2605 | 2600 | 2601 | 2603 | 9 |
| 2605 | 2600 | 2601 | 2604 | 9 |
| 2609 | 2600 | 2601 | 2602 | 9 |
| 2609 | 2600 | 2601 | 2603 | 9 |
| 2609 | 2600 | 2601 | 2604 | 9 |
| 2597 | 2600 | 2605 | 2606 | 9 |
| 2597 | 2600 | 2605 | 2607 | 9 |
| 2597 | 2600 | 2605 | 2608 | 9 |
| 2601 | 2600 | 2605 | 2606 | 9 |
| 2601 | 2600 | 2605 | 2607 | 9 |
| 2601 | 2600 | 2605 | 2608 | 9 |
| 2609 | 2600 | 2605 | 2606 | 9 |
| 2609 | 2600 | 2605 | 2607 | 9 |
| 2609 | 2600 | 2605 | 2608 | 9 |

|      |      |      |      |   |
|------|------|------|------|---|
| 2597 | 2600 | 2609 | 2610 | 9 |
| 2597 | 2600 | 2609 | 2611 | 9 |
| 2597 | 2600 | 2609 | 2612 | 9 |
| 2601 | 2600 | 2609 | 2610 | 9 |
| 2601 | 2600 | 2609 | 2611 | 9 |
| 2601 | 2600 | 2609 | 2612 | 9 |
| 2605 | 2600 | 2609 | 2610 | 9 |
| 2605 | 2600 | 2609 | 2611 | 9 |
| 2605 | 2600 | 2609 | 2612 | 9 |
| 2585 | 2613 | 2615 | 2616 | 9 |
| 2585 | 2613 | 2615 | 2617 | 9 |
| 2614 | 2613 | 2615 | 2616 | 9 |
| 2614 | 2613 | 2615 | 2617 | 9 |
| 2618 | 2613 | 2615 | 2616 | 9 |
| 2618 | 2613 | 2615 | 2617 | 9 |
| 2585 | 2613 | 2618 | 2619 | 9 |
| 2585 | 2613 | 2618 | 2620 | 9 |
| 2585 | 2613 | 2618 | 2621 | 9 |
| 2614 | 2613 | 2618 | 2619 | 9 |
| 2614 | 2613 | 2618 | 2620 | 9 |
| 2614 | 2613 | 2618 | 2621 | 9 |
| 2615 | 2613 | 2618 | 2619 | 9 |
| 2615 | 2613 | 2618 | 2620 | 9 |
| 2615 | 2613 | 2618 | 2621 | 9 |
| 2613 | 2618 | 2621 | 2622 | 9 |
| 2613 | 2618 | 2621 | 2623 | 9 |
| 2613 | 2618 | 2621 | 2648 | 9 |
| 2619 | 2618 | 2621 | 2622 | 9 |
| 2619 | 2618 | 2621 | 2623 | 9 |
| 2619 | 2618 | 2621 | 2648 | 9 |
| 2620 | 2618 | 2621 | 2622 | 9 |
| 2620 | 2618 | 2621 | 2623 | 9 |
| 2620 | 2618 | 2621 | 2648 | 9 |
| 2618 | 2621 | 2623 | 2624 | 9 |
| 2618 | 2621 | 2623 | 2625 | 9 |
| 2618 | 2621 | 2623 | 2626 | 9 |
| 2622 | 2621 | 2623 | 2624 | 9 |
| 2622 | 2621 | 2623 | 2625 | 9 |
| 2622 | 2621 | 2623 | 2626 | 9 |
| 2648 | 2621 | 2623 | 2624 | 9 |
| 2648 | 2621 | 2623 | 2625 | 9 |
| 2648 | 2621 | 2623 | 2626 | 9 |
| 2618 | 2621 | 2648 | 2649 | 9 |
| 2618 | 2621 | 2648 | 2650 | 9 |
| 2618 | 2621 | 2648 | 2676 | 9 |
| 2622 | 2621 | 2648 | 2649 | 9 |
| 2622 | 2621 | 2648 | 2650 | 9 |
| 2622 | 2621 | 2648 | 2676 | 9 |
| 2623 | 2621 | 2648 | 2649 | 9 |
| 2623 | 2621 | 2648 | 2650 | 9 |
| 2623 | 2621 | 2648 | 2676 | 9 |
| 2621 | 2623 | 2626 | 2627 | 9 |
| 2621 | 2623 | 2626 | 2628 | 9 |
| 2621 | 2623 | 2626 | 2629 | 9 |

|      |      |      |      |   |
|------|------|------|------|---|
| 2624 | 2623 | 2626 | 2627 | 9 |
| 2624 | 2623 | 2626 | 2628 | 9 |
| 2624 | 2623 | 2626 | 2629 | 9 |
| 2625 | 2623 | 2626 | 2627 | 9 |
| 2625 | 2623 | 2626 | 2628 | 9 |
| 2625 | 2623 | 2626 | 2629 | 9 |
| 2623 | 2626 | 2629 | 2630 | 9 |
| 2623 | 2626 | 2629 | 2631 | 9 |
| 2623 | 2626 | 2629 | 2632 | 9 |
| 2627 | 2626 | 2629 | 2630 | 9 |
| 2627 | 2626 | 2629 | 2631 | 9 |
| 2627 | 2626 | 2629 | 2632 | 9 |
| 2628 | 2626 | 2629 | 2630 | 9 |
| 2628 | 2626 | 2629 | 2631 | 9 |
| 2628 | 2626 | 2629 | 2632 | 9 |
| 2626 | 2629 | 2632 | 2633 | 9 |
| 2626 | 2629 | 2632 | 2634 | 9 |
| 2626 | 2629 | 2632 | 2635 | 9 |
| 2630 | 2629 | 2632 | 2633 | 9 |
| 2630 | 2629 | 2632 | 2634 | 9 |
| 2630 | 2629 | 2632 | 2635 | 9 |
| 2631 | 2629 | 2632 | 2633 | 9 |
| 2631 | 2629 | 2632 | 2634 | 9 |
| 2631 | 2629 | 2632 | 2635 | 9 |
| 2629 | 2632 | 2635 | 2636 | 9 |
| 2629 | 2632 | 2635 | 2637 | 9 |
| 2629 | 2632 | 2635 | 2638 | 9 |
| 2633 | 2632 | 2635 | 2636 | 9 |
| 2633 | 2632 | 2635 | 2637 | 9 |
| 2633 | 2632 | 2635 | 2638 | 9 |
| 2634 | 2632 | 2635 | 2636 | 9 |
| 2634 | 2632 | 2635 | 2637 | 9 |
| 2634 | 2632 | 2635 | 2638 | 9 |
| 2632 | 2635 | 2638 | 2639 | 9 |
| 2632 | 2635 | 2638 | 2640 | 9 |
| 2632 | 2635 | 2638 | 2641 | 9 |
| 2636 | 2635 | 2638 | 2639 | 9 |
| 2636 | 2635 | 2638 | 2640 | 9 |
| 2636 | 2635 | 2638 | 2641 | 9 |
| 2637 | 2635 | 2638 | 2639 | 9 |
| 2637 | 2635 | 2638 | 2640 | 9 |
| 2637 | 2635 | 2638 | 2641 | 9 |
| 2635 | 2638 | 2641 | 2642 | 9 |
| 2635 | 2638 | 2641 | 2643 | 9 |
| 2635 | 2638 | 2641 | 2644 | 9 |
| 2639 | 2638 | 2641 | 2642 | 9 |
| 2639 | 2638 | 2641 | 2643 | 9 |
| 2639 | 2638 | 2641 | 2644 | 9 |
| 2640 | 2638 | 2641 | 2642 | 9 |
| 2640 | 2638 | 2641 | 2643 | 9 |
| 2640 | 2638 | 2641 | 2644 | 9 |
| 2638 | 2641 | 2644 | 2645 | 9 |
| 2638 | 2641 | 2644 | 2646 | 9 |
| 2638 | 2641 | 2644 | 2647 | 9 |

|      |      |      |      |   |
|------|------|------|------|---|
| 2642 | 2641 | 2644 | 2645 | 9 |
| 2642 | 2641 | 2644 | 2646 | 9 |
| 2642 | 2641 | 2644 | 2647 | 9 |
| 2643 | 2641 | 2644 | 2645 | 9 |
| 2643 | 2641 | 2644 | 2646 | 9 |
| 2643 | 2641 | 2644 | 2647 | 9 |
| 2621 | 2648 | 2650 | 2651 | 9 |
| 2621 | 2648 | 2650 | 2652 | 9 |
| 2649 | 2648 | 2650 | 2651 | 9 |
| 2649 | 2648 | 2650 | 2652 | 9 |
| 2676 | 2648 | 2650 | 2651 | 9 |
| 2676 | 2648 | 2650 | 2652 | 9 |
| 2621 | 2648 | 2676 | 2677 | 9 |
| 2621 | 2648 | 2676 | 2678 | 9 |
| 2621 | 2648 | 2676 | 2681 | 9 |
| 2649 | 2648 | 2676 | 2677 | 9 |
| 2649 | 2648 | 2676 | 2678 | 9 |
| 2649 | 2648 | 2676 | 2681 | 9 |
| 2650 | 2648 | 2676 | 2677 | 9 |
| 2650 | 2648 | 2676 | 2678 | 9 |
| 2650 | 2648 | 2676 | 2681 | 9 |
| 2648 | 2650 | 2652 | 2653 | 9 |
| 2648 | 2650 | 2652 | 2654 | 9 |
| 2651 | 2650 | 2652 | 2653 | 9 |
| 2651 | 2650 | 2652 | 2654 | 9 |
| 2650 | 2652 | 2654 | 2655 | 9 |
| 2650 | 2652 | 2654 | 2656 | 9 |
| 2650 | 2652 | 2654 | 2657 | 9 |
| 2653 | 2652 | 2654 | 2655 | 9 |
| 2653 | 2652 | 2654 | 2656 | 9 |
| 2653 | 2652 | 2654 | 2657 | 9 |
| 2652 | 2654 | 2657 | 2658 | 9 |
| 2652 | 2654 | 2657 | 2659 | 9 |
| 2652 | 2654 | 2657 | 2660 | 9 |
| 2655 | 2654 | 2657 | 2658 | 9 |
| 2655 | 2654 | 2657 | 2659 | 9 |
| 2655 | 2654 | 2657 | 2660 | 9 |
| 2656 | 2654 | 2657 | 2658 | 9 |
| 2656 | 2654 | 2657 | 2659 | 9 |
| 2656 | 2654 | 2657 | 2660 | 9 |
| 2654 | 2657 | 2660 | 2661 | 9 |
| 2654 | 2657 | 2660 | 2662 | 9 |
| 2654 | 2657 | 2660 | 2663 | 9 |
| 2658 | 2657 | 2660 | 2661 | 9 |
| 2658 | 2657 | 2660 | 2662 | 9 |
| 2658 | 2657 | 2660 | 2663 | 9 |
| 2659 | 2657 | 2660 | 2661 | 9 |
| 2659 | 2657 | 2660 | 2662 | 9 |
| 2659 | 2657 | 2660 | 2663 | 9 |
| 2657 | 2660 | 2663 | 2664 | 9 |
| 2657 | 2660 | 2663 | 2668 | 9 |
| 2657 | 2660 | 2663 | 2672 | 9 |
| 2661 | 2660 | 2663 | 2664 | 9 |
| 2661 | 2660 | 2663 | 2668 | 9 |

|      |      |      |      |   |
|------|------|------|------|---|
| 2661 | 2660 | 2663 | 2672 | 9 |
| 2662 | 2660 | 2663 | 2664 | 9 |
| 2662 | 2660 | 2663 | 2668 | 9 |
| 2662 | 2660 | 2663 | 2672 | 9 |
| 2660 | 2663 | 2664 | 2665 | 9 |
| 2660 | 2663 | 2664 | 2666 | 9 |
| 2660 | 2663 | 2664 | 2667 | 9 |
| 2668 | 2663 | 2664 | 2665 | 9 |
| 2668 | 2663 | 2664 | 2666 | 9 |
| 2668 | 2663 | 2664 | 2667 | 9 |
| 2672 | 2663 | 2664 | 2665 | 9 |
| 2672 | 2663 | 2664 | 2666 | 9 |
| 2672 | 2663 | 2664 | 2667 | 9 |
| 2660 | 2663 | 2668 | 2669 | 9 |
| 2660 | 2663 | 2668 | 2670 | 9 |
| 2660 | 2663 | 2668 | 2671 | 9 |
| 2664 | 2663 | 2668 | 2669 | 9 |
| 2664 | 2663 | 2668 | 2670 | 9 |
| 2664 | 2663 | 2668 | 2671 | 9 |
| 2672 | 2663 | 2668 | 2669 | 9 |
| 2672 | 2663 | 2668 | 2670 | 9 |
| 2672 | 2663 | 2668 | 2671 | 9 |
| 2660 | 2663 | 2672 | 2673 | 9 |
| 2660 | 2663 | 2672 | 2674 | 9 |
| 2660 | 2663 | 2672 | 2675 | 9 |
| 2664 | 2663 | 2672 | 2673 | 9 |
| 2664 | 2663 | 2672 | 2674 | 9 |
| 2664 | 2663 | 2672 | 2675 | 9 |
| 2668 | 2663 | 2672 | 2673 | 9 |
| 2668 | 2663 | 2672 | 2674 | 9 |
| 2668 | 2663 | 2672 | 2675 | 9 |
| 2648 | 2676 | 2678 | 2679 | 9 |
| 2648 | 2676 | 2678 | 2680 | 9 |
| 2677 | 2676 | 2678 | 2679 | 9 |
| 2677 | 2676 | 2678 | 2680 | 9 |
| 2681 | 2676 | 2678 | 2679 | 9 |
| 2681 | 2676 | 2678 | 2680 | 9 |
| 2648 | 2676 | 2681 | 2682 | 9 |
| 2648 | 2676 | 2681 | 2683 | 9 |
| 2648 | 2676 | 2681 | 2684 | 9 |
| 2677 | 2676 | 2681 | 2682 | 9 |
| 2677 | 2676 | 2681 | 2683 | 9 |
| 2677 | 2676 | 2681 | 2684 | 9 |
| 2678 | 2676 | 2681 | 2682 | 9 |
| 2678 | 2676 | 2681 | 2683 | 9 |
| 2678 | 2676 | 2681 | 2684 | 9 |
| 2676 | 2681 | 2684 | 2685 | 9 |
| 2676 | 2681 | 2684 | 2686 | 9 |
| 2676 | 2681 | 2684 | 2711 | 9 |
| 2682 | 2681 | 2684 | 2685 | 9 |
| 2682 | 2681 | 2684 | 2686 | 9 |
| 2682 | 2681 | 2684 | 2711 | 9 |
| 2683 | 2681 | 2684 | 2685 | 9 |
| 2683 | 2681 | 2684 | 2686 | 9 |



|      |      |      |      |   |
|------|------|------|------|---|
| 2683 | 2681 | 2684 | 2711 | 9 |
| 2681 | 2684 | 2686 | 2687 | 9 |
| 2681 | 2684 | 2686 | 2688 | 9 |
| 2681 | 2684 | 2686 | 2689 | 9 |
| 2685 | 2684 | 2686 | 2687 | 9 |
| 2685 | 2684 | 2686 | 2688 | 9 |
| 2685 | 2684 | 2686 | 2689 | 9 |
| 2711 | 2684 | 2686 | 2687 | 9 |
| 2711 | 2684 | 2686 | 2688 | 9 |
| 2711 | 2684 | 2686 | 2689 | 9 |
| 2681 | 2684 | 2711 | 2712 | 9 |
| 2681 | 2684 | 2711 | 2713 | 9 |
| 2681 | 2684 | 2711 | 2739 | 9 |
| 2685 | 2684 | 2711 | 2712 | 9 |
| 2685 | 2684 | 2711 | 2713 | 9 |
| 2685 | 2684 | 2711 | 2739 | 9 |
| 2686 | 2684 | 2711 | 2712 | 9 |
| 2686 | 2684 | 2711 | 2713 | 9 |
| 2686 | 2684 | 2711 | 2739 | 9 |
| 2684 | 2686 | 2689 | 2690 | 9 |
| 2684 | 2686 | 2689 | 2691 | 9 |
| 2684 | 2686 | 2689 | 2692 | 9 |
| 2687 | 2686 | 2689 | 2690 | 9 |
| 2687 | 2686 | 2689 | 2691 | 9 |
| 2687 | 2686 | 2689 | 2692 | 9 |
| 2688 | 2686 | 2689 | 2690 | 9 |
| 2688 | 2686 | 2689 | 2691 | 9 |
| 2688 | 2686 | 2689 | 2692 | 9 |
| 2686 | 2689 | 2692 | 2693 | 9 |
| 2686 | 2689 | 2692 | 2694 | 9 |
| 2686 | 2689 | 2692 | 2695 | 9 |
| 2690 | 2689 | 2692 | 2693 | 9 |
| 2690 | 2689 | 2692 | 2694 | 9 |
| 2690 | 2689 | 2692 | 2695 | 9 |
| 2691 | 2689 | 2692 | 2693 | 9 |
| 2691 | 2689 | 2692 | 2694 | 9 |
| 2691 | 2689 | 2692 | 2695 | 9 |
| 2689 | 2692 | 2695 | 2696 | 9 |
| 2689 | 2692 | 2695 | 2697 | 9 |
| 2689 | 2692 | 2695 | 2698 | 9 |
| 2693 | 2692 | 2695 | 2696 | 9 |
| 2693 | 2692 | 2695 | 2697 | 9 |
| 2693 | 2692 | 2695 | 2698 | 9 |
| 2694 | 2692 | 2695 | 2696 | 9 |
| 2694 | 2692 | 2695 | 2697 | 9 |
| 2694 | 2692 | 2695 | 2698 | 9 |
| 2692 | 2695 | 2698 | 2699 | 9 |
| 2692 | 2695 | 2698 | 2700 | 9 |
| 2692 | 2695 | 2698 | 2701 | 9 |
| 2696 | 2695 | 2698 | 2699 | 9 |
| 2696 | 2695 | 2698 | 2700 | 9 |
| 2696 | 2695 | 2698 | 2701 | 9 |
| 2697 | 2695 | 2698 | 2699 | 9 |
| 2697 | 2695 | 2698 | 2700 | 9 |

|      |      |      |      |   |
|------|------|------|------|---|
| 2697 | 2695 | 2698 | 2701 | 9 |
| 2695 | 2698 | 2701 | 2702 | 9 |
| 2695 | 2698 | 2701 | 2703 | 9 |
| 2695 | 2698 | 2701 | 2704 | 9 |
| 2699 | 2698 | 2701 | 2702 | 9 |
| 2699 | 2698 | 2701 | 2703 | 9 |
| 2699 | 2698 | 2701 | 2704 | 9 |
| 2700 | 2698 | 2701 | 2702 | 9 |
| 2700 | 2698 | 2701 | 2703 | 9 |
| 2700 | 2698 | 2701 | 2704 | 9 |
| 2698 | 2701 | 2704 | 2705 | 9 |
| 2698 | 2701 | 2704 | 2706 | 9 |
| 2698 | 2701 | 2704 | 2707 | 9 |
| 2702 | 2701 | 2704 | 2705 | 9 |
| 2702 | 2701 | 2704 | 2706 | 9 |
| 2702 | 2701 | 2704 | 2707 | 9 |
| 2703 | 2701 | 2704 | 2705 | 9 |
| 2703 | 2701 | 2704 | 2706 | 9 |
| 2703 | 2701 | 2704 | 2707 | 9 |
| 2701 | 2704 | 2707 | 2708 | 9 |
| 2701 | 2704 | 2707 | 2709 | 9 |
| 2701 | 2704 | 2707 | 2710 | 9 |
| 2705 | 2704 | 2707 | 2708 | 9 |
| 2705 | 2704 | 2707 | 2709 | 9 |
| 2705 | 2704 | 2707 | 2710 | 9 |
| 2706 | 2704 | 2707 | 2708 | 9 |
| 2706 | 2704 | 2707 | 2709 | 9 |
| 2706 | 2704 | 2707 | 2710 | 9 |
| 2684 | 2711 | 2713 | 2714 | 9 |
| 2684 | 2711 | 2713 | 2715 | 9 |
| 2712 | 2711 | 2713 | 2714 | 9 |
| 2712 | 2711 | 2713 | 2715 | 9 |
| 2739 | 2711 | 2713 | 2714 | 9 |
| 2739 | 2711 | 2713 | 2715 | 9 |
| 2684 | 2711 | 2739 | 2740 | 9 |
| 2684 | 2711 | 2739 | 2741 | 9 |
| 2684 | 2711 | 2739 | 2744 | 9 |
| 2712 | 2711 | 2739 | 2740 | 9 |
| 2712 | 2711 | 2739 | 2741 | 9 |
| 2712 | 2711 | 2739 | 2744 | 9 |
| 2713 | 2711 | 2739 | 2740 | 9 |
| 2713 | 2711 | 2739 | 2741 | 9 |
| 2713 | 2711 | 2739 | 2744 | 9 |
| 2711 | 2713 | 2715 | 2716 | 9 |
| 2711 | 2713 | 2715 | 2717 | 9 |
| 2714 | 2713 | 2715 | 2716 | 9 |
| 2714 | 2713 | 2715 | 2717 | 9 |
| 2713 | 2715 | 2717 | 2718 | 9 |
| 2713 | 2715 | 2717 | 2719 | 9 |
| 2713 | 2715 | 2717 | 2720 | 9 |
| 2716 | 2715 | 2717 | 2718 | 9 |
| 2716 | 2715 | 2717 | 2719 | 9 |
| 2716 | 2715 | 2717 | 2720 | 9 |
| 2715 | 2717 | 2720 | 2721 | 9 |

|      |      |      |      |   |
|------|------|------|------|---|
| 2715 | 2717 | 2720 | 2722 | 9 |
| 2715 | 2717 | 2720 | 2723 | 9 |
| 2718 | 2717 | 2720 | 2721 | 9 |
| 2718 | 2717 | 2720 | 2722 | 9 |
| 2718 | 2717 | 2720 | 2723 | 9 |
| 2719 | 2717 | 2720 | 2721 | 9 |
| 2719 | 2717 | 2720 | 2722 | 9 |
| 2719 | 2717 | 2720 | 2723 | 9 |
| 2717 | 2720 | 2723 | 2724 | 9 |
| 2717 | 2720 | 2723 | 2725 | 9 |
| 2717 | 2720 | 2723 | 2726 | 9 |
| 2721 | 2720 | 2723 | 2724 | 9 |
| 2721 | 2720 | 2723 | 2725 | 9 |
| 2721 | 2720 | 2723 | 2726 | 9 |
| 2722 | 2720 | 2723 | 2724 | 9 |
| 2722 | 2720 | 2723 | 2725 | 9 |
| 2722 | 2720 | 2723 | 2726 | 9 |
| 2720 | 2723 | 2726 | 2727 | 9 |
| 2720 | 2723 | 2726 | 2731 | 9 |
| 2720 | 2723 | 2726 | 2735 | 9 |
| 2724 | 2723 | 2726 | 2727 | 9 |
| 2724 | 2723 | 2726 | 2731 | 9 |
| 2724 | 2723 | 2726 | 2735 | 9 |
| 2725 | 2723 | 2726 | 2727 | 9 |
| 2725 | 2723 | 2726 | 2731 | 9 |
| 2725 | 2723 | 2726 | 2735 | 9 |
| 2723 | 2726 | 2727 | 2728 | 9 |
| 2723 | 2726 | 2727 | 2729 | 9 |
| 2723 | 2726 | 2727 | 2730 | 9 |
| 2731 | 2726 | 2727 | 2728 | 9 |
| 2731 | 2726 | 2727 | 2729 | 9 |
| 2731 | 2726 | 2727 | 2730 | 9 |
| 2735 | 2726 | 2727 | 2728 | 9 |
| 2735 | 2726 | 2727 | 2729 | 9 |
| 2735 | 2726 | 2727 | 2730 | 9 |
| 2723 | 2726 | 2731 | 2732 | 9 |
| 2723 | 2726 | 2731 | 2733 | 9 |
| 2723 | 2726 | 2731 | 2734 | 9 |
| 2727 | 2726 | 2731 | 2732 | 9 |
| 2727 | 2726 | 2731 | 2733 | 9 |
| 2727 | 2726 | 2731 | 2734 | 9 |
| 2735 | 2726 | 2731 | 2732 | 9 |
| 2735 | 2726 | 2731 | 2733 | 9 |
| 2735 | 2726 | 2731 | 2734 | 9 |
| 2723 | 2726 | 2735 | 2736 | 9 |
| 2723 | 2726 | 2735 | 2737 | 9 |
| 2723 | 2726 | 2735 | 2738 | 9 |
| 2727 | 2726 | 2735 | 2736 | 9 |
| 2727 | 2726 | 2735 | 2737 | 9 |
| 2727 | 2726 | 2735 | 2738 | 9 |
| 2731 | 2726 | 2735 | 2736 | 9 |
| 2731 | 2726 | 2735 | 2737 | 9 |
| 2731 | 2726 | 2735 | 2738 | 9 |
| 2711 | 2739 | 2741 | 2742 | 9 |

|      |      |      |      |   |
|------|------|------|------|---|
| 2711 | 2739 | 2741 | 2743 | 9 |
| 2740 | 2739 | 2741 | 2742 | 9 |
| 2740 | 2739 | 2741 | 2743 | 9 |
| 2744 | 2739 | 2741 | 2742 | 9 |
| 2744 | 2739 | 2741 | 2743 | 9 |
| 2711 | 2739 | 2744 | 2745 | 9 |
| 2711 | 2739 | 2744 | 2746 | 9 |
| 2711 | 2739 | 2744 | 2747 | 9 |
| 2740 | 2739 | 2744 | 2745 | 9 |
| 2740 | 2739 | 2744 | 2746 | 9 |
| 2740 | 2739 | 2744 | 2747 | 9 |
| 2741 | 2739 | 2744 | 2745 | 9 |
| 2741 | 2739 | 2744 | 2746 | 9 |
| 2741 | 2739 | 2744 | 2747 | 9 |
| 2739 | 2744 | 2747 | 2748 | 9 |
| 2739 | 2744 | 2747 | 2749 | 9 |
| 2739 | 2744 | 2747 | 2774 | 9 |
| 2745 | 2744 | 2747 | 2748 | 9 |
| 2745 | 2744 | 2747 | 2749 | 9 |
| 2745 | 2744 | 2747 | 2774 | 9 |
| 2746 | 2744 | 2747 | 2748 | 9 |
| 2746 | 2744 | 2747 | 2749 | 9 |
| 2746 | 2744 | 2747 | 2774 | 9 |
| 2744 | 2747 | 2749 | 2750 | 9 |
| 2744 | 2747 | 2749 | 2751 | 9 |
| 2744 | 2747 | 2749 | 2752 | 9 |
| 2748 | 2747 | 2749 | 2750 | 9 |
| 2748 | 2747 | 2749 | 2751 | 9 |
| 2748 | 2747 | 2749 | 2752 | 9 |
| 2774 | 2747 | 2749 | 2750 | 9 |
| 2774 | 2747 | 2749 | 2751 | 9 |
| 2774 | 2747 | 2749 | 2752 | 9 |
| 2744 | 2747 | 2774 | 2775 | 9 |
| 2744 | 2747 | 2774 | 2776 | 9 |
| 2744 | 2747 | 2774 | 2802 | 9 |
| 2748 | 2747 | 2774 | 2775 | 9 |
| 2748 | 2747 | 2774 | 2776 | 9 |
| 2748 | 2747 | 2774 | 2802 | 9 |
| 2749 | 2747 | 2774 | 2775 | 9 |
| 2749 | 2747 | 2774 | 2776 | 9 |
| 2749 | 2747 | 2774 | 2802 | 9 |
| 2747 | 2749 | 2752 | 2753 | 9 |
| 2747 | 2749 | 2752 | 2754 | 9 |
| 2747 | 2749 | 2752 | 2755 | 9 |
| 2750 | 2749 | 2752 | 2753 | 9 |
| 2750 | 2749 | 2752 | 2754 | 9 |
| 2750 | 2749 | 2752 | 2755 | 9 |
| 2751 | 2749 | 2752 | 2753 | 9 |
| 2751 | 2749 | 2752 | 2754 | 9 |
| 2751 | 2749 | 2752 | 2755 | 9 |
| 2749 | 2752 | 2755 | 2756 | 9 |
| 2749 | 2752 | 2755 | 2757 | 9 |
| 2749 | 2752 | 2755 | 2758 | 9 |
| 2753 | 2752 | 2755 | 2756 | 9 |

|      |      |      |      |   |
|------|------|------|------|---|
| 2753 | 2752 | 2755 | 2757 | 9 |
| 2753 | 2752 | 2755 | 2758 | 9 |
| 2754 | 2752 | 2755 | 2756 | 9 |
| 2754 | 2752 | 2755 | 2757 | 9 |
| 2754 | 2752 | 2755 | 2758 | 9 |
| 2752 | 2755 | 2758 | 2759 | 9 |
| 2752 | 2755 | 2758 | 2760 | 9 |
| 2752 | 2755 | 2758 | 2761 | 9 |
| 2756 | 2755 | 2758 | 2759 | 9 |
| 2756 | 2755 | 2758 | 2760 | 9 |
| 2756 | 2755 | 2758 | 2761 | 9 |
| 2757 | 2755 | 2758 | 2759 | 9 |
| 2757 | 2755 | 2758 | 2760 | 9 |
| 2757 | 2755 | 2758 | 2761 | 9 |
| 2755 | 2758 | 2761 | 2762 | 9 |
| 2755 | 2758 | 2761 | 2763 | 9 |
| 2755 | 2758 | 2761 | 2764 | 9 |
| 2759 | 2758 | 2761 | 2762 | 9 |
| 2759 | 2758 | 2761 | 2763 | 9 |
| 2759 | 2758 | 2761 | 2764 | 9 |
| 2760 | 2758 | 2761 | 2762 | 9 |
| 2760 | 2758 | 2761 | 2763 | 9 |
| 2760 | 2758 | 2761 | 2764 | 9 |
| 2758 | 2761 | 2764 | 2765 | 9 |
| 2758 | 2761 | 2764 | 2766 | 9 |
| 2758 | 2761 | 2764 | 2767 | 9 |
| 2762 | 2761 | 2764 | 2765 | 9 |
| 2762 | 2761 | 2764 | 2766 | 9 |
| 2762 | 2761 | 2764 | 2767 | 9 |
| 2763 | 2761 | 2764 | 2765 | 9 |
| 2763 | 2761 | 2764 | 2766 | 9 |
| 2763 | 2761 | 2764 | 2767 | 9 |
| 2761 | 2764 | 2767 | 2768 | 9 |
| 2761 | 2764 | 2767 | 2769 | 9 |
| 2761 | 2764 | 2767 | 2770 | 9 |
| 2765 | 2764 | 2767 | 2768 | 9 |
| 2765 | 2764 | 2767 | 2769 | 9 |
| 2765 | 2764 | 2767 | 2770 | 9 |
| 2766 | 2764 | 2767 | 2768 | 9 |
| 2766 | 2764 | 2767 | 2769 | 9 |
| 2766 | 2764 | 2767 | 2770 | 9 |
| 2764 | 2767 | 2770 | 2771 | 9 |
| 2764 | 2767 | 2770 | 2772 | 9 |
| 2764 | 2767 | 2770 | 2773 | 9 |
| 2768 | 2767 | 2770 | 2771 | 9 |
| 2768 | 2767 | 2770 | 2772 | 9 |
| 2768 | 2767 | 2770 | 2773 | 9 |
| 2769 | 2767 | 2770 | 2771 | 9 |
| 2769 | 2767 | 2770 | 2772 | 9 |
| 2769 | 2767 | 2770 | 2773 | 9 |
| 2747 | 2774 | 2776 | 2777 | 9 |
| 2747 | 2774 | 2776 | 2778 | 9 |
| 2775 | 2774 | 2776 | 2777 | 9 |
| 2775 | 2774 | 2776 | 2778 | 9 |

|      |      |      |      |   |
|------|------|------|------|---|
| 2802 | 2774 | 2776 | 2777 | 9 |
| 2802 | 2774 | 2776 | 2778 | 9 |
| 2747 | 2774 | 2802 | 2803 | 9 |
| 2747 | 2774 | 2802 | 2804 | 9 |
| 2747 | 2774 | 2802 | 2807 | 9 |
| 2775 | 2774 | 2802 | 2803 | 9 |
| 2775 | 2774 | 2802 | 2804 | 9 |
| 2775 | 2774 | 2802 | 2807 | 9 |
| 2776 | 2774 | 2802 | 2803 | 9 |
| 2776 | 2774 | 2802 | 2804 | 9 |
| 2776 | 2774 | 2802 | 2807 | 9 |
| 2774 | 2776 | 2778 | 2779 | 9 |
| 2774 | 2776 | 2778 | 2780 | 9 |
| 2777 | 2776 | 2778 | 2779 | 9 |
| 2777 | 2776 | 2778 | 2780 | 9 |
| 2776 | 2778 | 2780 | 2781 | 9 |
| 2776 | 2778 | 2780 | 2782 | 9 |
| 2776 | 2778 | 2780 | 2783 | 9 |
| 2779 | 2778 | 2780 | 2781 | 9 |
| 2779 | 2778 | 2780 | 2782 | 9 |
| 2779 | 2778 | 2780 | 2783 | 9 |
| 2778 | 2780 | 2783 | 2784 | 9 |
| 2778 | 2780 | 2783 | 2785 | 9 |
| 2778 | 2780 | 2783 | 2786 | 9 |
| 2781 | 2780 | 2783 | 2784 | 9 |
| 2781 | 2780 | 2783 | 2785 | 9 |
| 2781 | 2780 | 2783 | 2786 | 9 |
| 2782 | 2780 | 2783 | 2784 | 9 |
| 2782 | 2780 | 2783 | 2785 | 9 |
| 2782 | 2780 | 2783 | 2786 | 9 |
| 2780 | 2783 | 2786 | 2787 | 9 |
| 2780 | 2783 | 2786 | 2788 | 9 |
| 2780 | 2783 | 2786 | 2789 | 9 |
| 2784 | 2783 | 2786 | 2787 | 9 |
| 2784 | 2783 | 2786 | 2788 | 9 |
| 2784 | 2783 | 2786 | 2789 | 9 |
| 2785 | 2783 | 2786 | 2787 | 9 |
| 2785 | 2783 | 2786 | 2788 | 9 |
| 2785 | 2783 | 2786 | 2789 | 9 |
| 2783 | 2786 | 2789 | 2790 | 9 |
| 2783 | 2786 | 2789 | 2794 | 9 |
| 2783 | 2786 | 2789 | 2798 | 9 |
| 2787 | 2786 | 2789 | 2790 | 9 |
| 2787 | 2786 | 2789 | 2794 | 9 |
| 2787 | 2786 | 2789 | 2798 | 9 |
| 2788 | 2786 | 2789 | 2790 | 9 |
| 2788 | 2786 | 2789 | 2794 | 9 |
| 2788 | 2786 | 2789 | 2798 | 9 |
| 2786 | 2789 | 2790 | 2791 | 9 |
| 2786 | 2789 | 2790 | 2792 | 9 |
| 2786 | 2789 | 2790 | 2793 | 9 |
| 2794 | 2789 | 2790 | 2791 | 9 |
| 2794 | 2789 | 2790 | 2792 | 9 |
| 2794 | 2789 | 2790 | 2793 | 9 |

|      |      |      |      |   |
|------|------|------|------|---|
| 2798 | 2789 | 2790 | 2791 | 9 |
| 2798 | 2789 | 2790 | 2792 | 9 |
| 2798 | 2789 | 2790 | 2793 | 9 |
| 2786 | 2789 | 2794 | 2795 | 9 |
| 2786 | 2789 | 2794 | 2796 | 9 |
| 2786 | 2789 | 2794 | 2797 | 9 |
| 2790 | 2789 | 2794 | 2795 | 9 |
| 2790 | 2789 | 2794 | 2796 | 9 |
| 2790 | 2789 | 2794 | 2797 | 9 |
| 2798 | 2789 | 2794 | 2795 | 9 |
| 2798 | 2789 | 2794 | 2796 | 9 |
| 2798 | 2789 | 2794 | 2797 | 9 |
| 2786 | 2789 | 2798 | 2799 | 9 |
| 2786 | 2789 | 2798 | 2800 | 9 |
| 2786 | 2789 | 2798 | 2801 | 9 |
| 2790 | 2789 | 2798 | 2799 | 9 |
| 2790 | 2789 | 2798 | 2800 | 9 |
| 2790 | 2789 | 2798 | 2801 | 9 |
| 2794 | 2789 | 2798 | 2799 | 9 |
| 2794 | 2789 | 2798 | 2800 | 9 |
| 2794 | 2789 | 2798 | 2801 | 9 |
| 2774 | 2802 | 2804 | 2805 | 9 |
| 2774 | 2802 | 2804 | 2806 | 9 |
| 2803 | 2802 | 2804 | 2805 | 9 |
| 2803 | 2802 | 2804 | 2806 | 9 |
| 2807 | 2802 | 2804 | 2805 | 9 |
| 2807 | 2802 | 2804 | 2806 | 9 |
| 2774 | 2802 | 2807 | 2808 | 9 |
| 2774 | 2802 | 2807 | 2809 | 9 |
| 2774 | 2802 | 2807 | 2810 | 9 |
| 2803 | 2802 | 2807 | 2808 | 9 |
| 2803 | 2802 | 2807 | 2809 | 9 |
| 2803 | 2802 | 2807 | 2810 | 9 |
| 2804 | 2802 | 2807 | 2808 | 9 |
| 2804 | 2802 | 2807 | 2809 | 9 |
| 2804 | 2802 | 2807 | 2810 | 9 |
| 2802 | 2807 | 2810 | 2811 | 9 |
| 2802 | 2807 | 2810 | 2812 | 9 |
| 2802 | 2807 | 2810 | 2837 | 9 |
| 2808 | 2807 | 2810 | 2811 | 9 |
| 2808 | 2807 | 2810 | 2812 | 9 |
| 2808 | 2807 | 2810 | 2837 | 9 |
| 2809 | 2807 | 2810 | 2811 | 9 |
| 2809 | 2807 | 2810 | 2812 | 9 |
| 2809 | 2807 | 2810 | 2837 | 9 |
| 2807 | 2810 | 2812 | 2813 | 9 |
| 2807 | 2810 | 2812 | 2814 | 9 |
| 2807 | 2810 | 2812 | 2815 | 9 |
| 2811 | 2810 | 2812 | 2813 | 9 |
| 2811 | 2810 | 2812 | 2814 | 9 |
| 2811 | 2810 | 2812 | 2815 | 9 |
| 2837 | 2810 | 2812 | 2813 | 9 |
| 2837 | 2810 | 2812 | 2814 | 9 |
| 2837 | 2810 | 2812 | 2815 | 9 |

|      |      |      |      |   |
|------|------|------|------|---|
| 2807 | 2810 | 2837 | 2838 | 9 |
| 2807 | 2810 | 2837 | 2839 | 9 |
| 2807 | 2810 | 2837 | 2865 | 9 |
| 2811 | 2810 | 2837 | 2838 | 9 |
| 2811 | 2810 | 2837 | 2839 | 9 |
| 2811 | 2810 | 2837 | 2865 | 9 |
| 2812 | 2810 | 2837 | 2838 | 9 |
| 2812 | 2810 | 2837 | 2839 | 9 |
| 2812 | 2810 | 2837 | 2865 | 9 |
| 2810 | 2812 | 2815 | 2816 | 9 |
| 2810 | 2812 | 2815 | 2817 | 9 |
| 2810 | 2812 | 2815 | 2818 | 9 |
| 2813 | 2812 | 2815 | 2816 | 9 |
| 2813 | 2812 | 2815 | 2817 | 9 |
| 2813 | 2812 | 2815 | 2818 | 9 |
| 2814 | 2812 | 2815 | 2816 | 9 |
| 2814 | 2812 | 2815 | 2817 | 9 |
| 2814 | 2812 | 2815 | 2818 | 9 |
| 2812 | 2815 | 2818 | 2819 | 9 |
| 2812 | 2815 | 2818 | 2820 | 9 |
| 2812 | 2815 | 2818 | 2821 | 9 |
| 2816 | 2815 | 2818 | 2819 | 9 |
| 2816 | 2815 | 2818 | 2820 | 9 |
| 2816 | 2815 | 2818 | 2821 | 9 |
| 2817 | 2815 | 2818 | 2819 | 9 |
| 2817 | 2815 | 2818 | 2820 | 9 |
| 2817 | 2815 | 2818 | 2821 | 9 |
| 2815 | 2818 | 2821 | 2822 | 9 |
| 2815 | 2818 | 2821 | 2823 | 9 |
| 2815 | 2818 | 2821 | 2824 | 9 |
| 2819 | 2818 | 2821 | 2822 | 9 |
| 2819 | 2818 | 2821 | 2823 | 9 |
| 2819 | 2818 | 2821 | 2824 | 9 |
| 2820 | 2818 | 2821 | 2822 | 9 |
| 2820 | 2818 | 2821 | 2823 | 9 |
| 2820 | 2818 | 2821 | 2824 | 9 |
| 2818 | 2821 | 2824 | 2825 | 9 |
| 2818 | 2821 | 2824 | 2826 | 9 |
| 2818 | 2821 | 2824 | 2827 | 9 |
| 2822 | 2821 | 2824 | 2825 | 9 |
| 2822 | 2821 | 2824 | 2826 | 9 |
| 2822 | 2821 | 2824 | 2827 | 9 |
| 2823 | 2821 | 2824 | 2825 | 9 |
| 2823 | 2821 | 2824 | 2826 | 9 |
| 2823 | 2821 | 2824 | 2827 | 9 |
| 2821 | 2824 | 2827 | 2828 | 9 |
| 2821 | 2824 | 2827 | 2829 | 9 |
| 2821 | 2824 | 2827 | 2830 | 9 |
| 2825 | 2824 | 2827 | 2828 | 9 |
| 2825 | 2824 | 2827 | 2829 | 9 |
| 2825 | 2824 | 2827 | 2830 | 9 |
| 2826 | 2824 | 2827 | 2828 | 9 |
| 2826 | 2824 | 2827 | 2829 | 9 |
| 2826 | 2824 | 2827 | 2830 | 9 |



|      |      |      |      |   |
|------|------|------|------|---|
| 2824 | 2827 | 2830 | 2831 | 9 |
| 2824 | 2827 | 2830 | 2832 | 9 |
| 2824 | 2827 | 2830 | 2833 | 9 |
| 2828 | 2827 | 2830 | 2831 | 9 |
| 2828 | 2827 | 2830 | 2832 | 9 |
| 2828 | 2827 | 2830 | 2833 | 9 |
| 2829 | 2827 | 2830 | 2831 | 9 |
| 2829 | 2827 | 2830 | 2832 | 9 |
| 2829 | 2827 | 2830 | 2833 | 9 |
| 2827 | 2830 | 2833 | 2834 | 9 |
| 2827 | 2830 | 2833 | 2835 | 9 |
| 2827 | 2830 | 2833 | 2836 | 9 |
| 2831 | 2830 | 2833 | 2834 | 9 |
| 2831 | 2830 | 2833 | 2835 | 9 |
| 2831 | 2830 | 2833 | 2836 | 9 |
| 2832 | 2830 | 2833 | 2834 | 9 |
| 2832 | 2830 | 2833 | 2835 | 9 |
| 2832 | 2830 | 2833 | 2836 | 9 |
| 2810 | 2837 | 2839 | 2840 | 9 |
| 2810 | 2837 | 2839 | 2841 | 9 |
| 2838 | 2837 | 2839 | 2840 | 9 |
| 2838 | 2837 | 2839 | 2841 | 9 |
| 2865 | 2837 | 2839 | 2840 | 9 |
| 2865 | 2837 | 2839 | 2841 | 9 |
| 2810 | 2837 | 2865 | 2866 | 9 |
| 2810 | 2837 | 2865 | 2867 | 9 |
| 2810 | 2837 | 2865 | 2870 | 9 |
| 2838 | 2837 | 2865 | 2866 | 9 |
| 2838 | 2837 | 2865 | 2867 | 9 |
| 2838 | 2837 | 2865 | 2870 | 9 |
| 2839 | 2837 | 2865 | 2866 | 9 |
| 2839 | 2837 | 2865 | 2867 | 9 |
| 2839 | 2837 | 2865 | 2870 | 9 |
| 2837 | 2839 | 2841 | 2842 | 9 |
| 2837 | 2839 | 2841 | 2843 | 9 |
| 2840 | 2839 | 2841 | 2842 | 9 |
| 2840 | 2839 | 2841 | 2843 | 9 |
| 2839 | 2841 | 2843 | 2844 | 9 |
| 2839 | 2841 | 2843 | 2845 | 9 |
| 2839 | 2841 | 2843 | 2846 | 9 |
| 2842 | 2841 | 2843 | 2844 | 9 |
| 2842 | 2841 | 2843 | 2845 | 9 |
| 2842 | 2841 | 2843 | 2846 | 9 |
| 2841 | 2843 | 2846 | 2847 | 9 |
| 2841 | 2843 | 2846 | 2848 | 9 |
| 2841 | 2843 | 2846 | 2849 | 9 |
| 2844 | 2843 | 2846 | 2847 | 9 |
| 2844 | 2843 | 2846 | 2848 | 9 |
| 2844 | 2843 | 2846 | 2849 | 9 |
| 2845 | 2843 | 2846 | 2847 | 9 |
| 2845 | 2843 | 2846 | 2848 | 9 |
| 2845 | 2843 | 2846 | 2849 | 9 |
| 2843 | 2846 | 2849 | 2850 | 9 |
| 2843 | 2846 | 2849 | 2851 | 9 |

|      |      |      |      |   |
|------|------|------|------|---|
| 2843 | 2846 | 2849 | 2852 | 9 |
| 2847 | 2846 | 2849 | 2850 | 9 |
| 2847 | 2846 | 2849 | 2851 | 9 |
| 2847 | 2846 | 2849 | 2852 | 9 |
| 2848 | 2846 | 2849 | 2850 | 9 |
| 2848 | 2846 | 2849 | 2851 | 9 |
| 2848 | 2846 | 2849 | 2852 | 9 |
| 2846 | 2849 | 2852 | 2853 | 9 |
| 2846 | 2849 | 2852 | 2857 | 9 |
| 2846 | 2849 | 2852 | 2861 | 9 |
| 2850 | 2849 | 2852 | 2853 | 9 |
| 2850 | 2849 | 2852 | 2857 | 9 |
| 2850 | 2849 | 2852 | 2861 | 9 |
| 2851 | 2849 | 2852 | 2853 | 9 |
| 2851 | 2849 | 2852 | 2857 | 9 |
| 2851 | 2849 | 2852 | 2861 | 9 |
| 2849 | 2852 | 2853 | 2854 | 9 |
| 2849 | 2852 | 2853 | 2855 | 9 |
| 2849 | 2852 | 2853 | 2856 | 9 |
| 2857 | 2852 | 2853 | 2854 | 9 |
| 2857 | 2852 | 2853 | 2855 | 9 |
| 2857 | 2852 | 2853 | 2856 | 9 |
| 2861 | 2852 | 2853 | 2854 | 9 |
| 2861 | 2852 | 2853 | 2855 | 9 |
| 2861 | 2852 | 2853 | 2856 | 9 |
| 2849 | 2852 | 2857 | 2858 | 9 |
| 2849 | 2852 | 2857 | 2859 | 9 |
| 2849 | 2852 | 2857 | 2860 | 9 |
| 2853 | 2852 | 2857 | 2858 | 9 |
| 2853 | 2852 | 2857 | 2859 | 9 |
| 2853 | 2852 | 2857 | 2860 | 9 |
| 2861 | 2852 | 2857 | 2858 | 9 |
| 2861 | 2852 | 2857 | 2859 | 9 |
| 2861 | 2852 | 2857 | 2860 | 9 |
| 2849 | 2852 | 2861 | 2862 | 9 |
| 2849 | 2852 | 2861 | 2863 | 9 |
| 2849 | 2852 | 2861 | 2864 | 9 |
| 2853 | 2852 | 2861 | 2862 | 9 |
| 2853 | 2852 | 2861 | 2863 | 9 |
| 2853 | 2852 | 2861 | 2864 | 9 |
| 2857 | 2852 | 2861 | 2862 | 9 |
| 2857 | 2852 | 2861 | 2863 | 9 |
| 2857 | 2852 | 2861 | 2864 | 9 |
| 2837 | 2865 | 2867 | 2868 | 9 |
| 2837 | 2865 | 2867 | 2869 | 9 |
| 2866 | 2865 | 2867 | 2868 | 9 |
| 2866 | 2865 | 2867 | 2869 | 9 |
| 2870 | 2865 | 2867 | 2868 | 9 |
| 2870 | 2865 | 2867 | 2869 | 9 |
| 2837 | 2865 | 2870 | 2871 | 9 |
| 2837 | 2865 | 2870 | 2872 | 9 |
| 2837 | 2865 | 2870 | 2873 | 9 |
| 2866 | 2865 | 2870 | 2871 | 9 |
| 2866 | 2865 | 2870 | 2872 | 9 |

|      |      |      |      |   |
|------|------|------|------|---|
| 2866 | 2865 | 2870 | 2873 | 9 |
| 2867 | 2865 | 2870 | 2871 | 9 |
| 2867 | 2865 | 2870 | 2872 | 9 |
| 2867 | 2865 | 2870 | 2873 | 9 |
| 2865 | 2870 | 2873 | 2874 | 9 |
| 2865 | 2870 | 2873 | 2875 | 9 |
| 2865 | 2870 | 2873 | 2900 | 9 |
| 2871 | 2870 | 2873 | 2874 | 9 |
| 2871 | 2870 | 2873 | 2875 | 9 |
| 2871 | 2870 | 2873 | 2900 | 9 |
| 2872 | 2870 | 2873 | 2874 | 9 |
| 2872 | 2870 | 2873 | 2875 | 9 |
| 2872 | 2870 | 2873 | 2900 | 9 |
| 2870 | 2873 | 2875 | 2876 | 9 |
| 2870 | 2873 | 2875 | 2877 | 9 |
| 2870 | 2873 | 2875 | 2878 | 9 |
| 2874 | 2873 | 2875 | 2876 | 9 |
| 2874 | 2873 | 2875 | 2877 | 9 |
| 2874 | 2873 | 2875 | 2878 | 9 |
| 2900 | 2873 | 2875 | 2876 | 9 |
| 2900 | 2873 | 2875 | 2877 | 9 |
| 2900 | 2873 | 2875 | 2878 | 9 |
| 2870 | 2873 | 2900 | 2901 | 9 |
| 2870 | 2873 | 2900 | 2902 | 9 |
| 2870 | 2873 | 2900 | 2928 | 9 |
| 2874 | 2873 | 2900 | 2901 | 9 |
| 2874 | 2873 | 2900 | 2902 | 9 |
| 2874 | 2873 | 2900 | 2928 | 9 |
| 2875 | 2873 | 2900 | 2901 | 9 |
| 2875 | 2873 | 2900 | 2902 | 9 |
| 2875 | 2873 | 2900 | 2928 | 9 |
| 2873 | 2875 | 2878 | 2879 | 9 |
| 2873 | 2875 | 2878 | 2880 | 9 |
| 2873 | 2875 | 2878 | 2881 | 9 |
| 2876 | 2875 | 2878 | 2879 | 9 |
| 2876 | 2875 | 2878 | 2880 | 9 |
| 2876 | 2875 | 2878 | 2881 | 9 |
| 2877 | 2875 | 2878 | 2879 | 9 |
| 2877 | 2875 | 2878 | 2880 | 9 |
| 2877 | 2875 | 2878 | 2881 | 9 |
| 2875 | 2878 | 2881 | 2882 | 9 |
| 2875 | 2878 | 2881 | 2883 | 9 |
| 2875 | 2878 | 2881 | 2884 | 9 |
| 2879 | 2878 | 2881 | 2882 | 9 |
| 2879 | 2878 | 2881 | 2883 | 9 |
| 2879 | 2878 | 2881 | 2884 | 9 |
| 2880 | 2878 | 2881 | 2882 | 9 |
| 2880 | 2878 | 2881 | 2883 | 9 |
| 2880 | 2878 | 2881 | 2884 | 9 |
| 2878 | 2881 | 2884 | 2885 | 9 |
| 2878 | 2881 | 2884 | 2886 | 9 |
| 2878 | 2881 | 2884 | 2887 | 9 |
| 2882 | 2881 | 2884 | 2885 | 9 |
| 2882 | 2881 | 2884 | 2886 | 9 |

|      |      |      |      |   |
|------|------|------|------|---|
| 2882 | 2881 | 2884 | 2887 | 9 |
| 2883 | 2881 | 2884 | 2885 | 9 |
| 2883 | 2881 | 2884 | 2886 | 9 |
| 2883 | 2881 | 2884 | 2887 | 9 |
| 2881 | 2884 | 2887 | 2888 | 9 |
| 2881 | 2884 | 2887 | 2889 | 9 |
| 2881 | 2884 | 2887 | 2890 | 9 |
| 2885 | 2884 | 2887 | 2888 | 9 |
| 2885 | 2884 | 2887 | 2889 | 9 |
| 2885 | 2884 | 2887 | 2890 | 9 |
| 2886 | 2884 | 2887 | 2888 | 9 |
| 2886 | 2884 | 2887 | 2889 | 9 |
| 2886 | 2884 | 2887 | 2890 | 9 |
| 2884 | 2887 | 2890 | 2891 | 9 |
| 2884 | 2887 | 2890 | 2892 | 9 |
| 2884 | 2887 | 2890 | 2893 | 9 |
| 2888 | 2887 | 2890 | 2891 | 9 |
| 2888 | 2887 | 2890 | 2892 | 9 |
| 2888 | 2887 | 2890 | 2893 | 9 |
| 2889 | 2887 | 2890 | 2891 | 9 |
| 2889 | 2887 | 2890 | 2892 | 9 |
| 2889 | 2887 | 2890 | 2893 | 9 |
| 2887 | 2890 | 2893 | 2894 | 9 |
| 2887 | 2890 | 2893 | 2895 | 9 |
| 2887 | 2890 | 2893 | 2896 | 9 |
| 2891 | 2890 | 2893 | 2894 | 9 |
| 2891 | 2890 | 2893 | 2895 | 9 |
| 2891 | 2890 | 2893 | 2896 | 9 |
| 2892 | 2890 | 2893 | 2894 | 9 |
| 2892 | 2890 | 2893 | 2895 | 9 |
| 2892 | 2890 | 2893 | 2896 | 9 |
| 2890 | 2893 | 2896 | 2897 | 9 |
| 2890 | 2893 | 2896 | 2898 | 9 |
| 2890 | 2893 | 2896 | 2899 | 9 |
| 2894 | 2893 | 2896 | 2897 | 9 |
| 2894 | 2893 | 2896 | 2898 | 9 |
| 2894 | 2893 | 2896 | 2899 | 9 |
| 2895 | 2893 | 2896 | 2897 | 9 |
| 2895 | 2893 | 2896 | 2898 | 9 |
| 2895 | 2893 | 2896 | 2899 | 9 |
| 2873 | 2900 | 2902 | 2903 | 9 |
| 2873 | 2900 | 2902 | 2904 | 9 |
| 2901 | 2900 | 2902 | 2903 | 9 |
| 2901 | 2900 | 2902 | 2904 | 9 |
| 2928 | 2900 | 2902 | 2903 | 9 |
| 2928 | 2900 | 2902 | 2904 | 9 |
| 2873 | 2900 | 2928 | 2929 | 9 |
| 2873 | 2900 | 2928 | 2930 | 9 |
| 2873 | 2900 | 2928 | 2933 | 9 |
| 2901 | 2900 | 2928 | 2929 | 9 |
| 2901 | 2900 | 2928 | 2930 | 9 |
| 2901 | 2900 | 2928 | 2933 | 9 |
| 2902 | 2900 | 2928 | 2929 | 9 |
| 2902 | 2900 | 2928 | 2930 | 9 |

|      |      |      |      |   |
|------|------|------|------|---|
| 2902 | 2900 | 2928 | 2933 | 9 |
| 2900 | 2902 | 2904 | 2905 | 9 |
| 2900 | 2902 | 2904 | 2906 | 9 |
| 2903 | 2902 | 2904 | 2905 | 9 |
| 2903 | 2902 | 2904 | 2906 | 9 |
| 2902 | 2904 | 2906 | 2907 | 9 |
| 2902 | 2904 | 2906 | 2908 | 9 |
| 2902 | 2904 | 2906 | 2909 | 9 |
| 2905 | 2904 | 2906 | 2907 | 9 |
| 2905 | 2904 | 2906 | 2908 | 9 |
| 2905 | 2904 | 2906 | 2909 | 9 |
| 2904 | 2906 | 2909 | 2910 | 9 |
| 2904 | 2906 | 2909 | 2911 | 9 |
| 2904 | 2906 | 2909 | 2912 | 9 |
| 2907 | 2906 | 2909 | 2910 | 9 |
| 2907 | 2906 | 2909 | 2911 | 9 |
| 2907 | 2906 | 2909 | 2912 | 9 |
| 2908 | 2906 | 2909 | 2910 | 9 |
| 2908 | 2906 | 2909 | 2911 | 9 |
| 2908 | 2906 | 2909 | 2912 | 9 |
| 2906 | 2909 | 2912 | 2913 | 9 |
| 2906 | 2909 | 2912 | 2914 | 9 |
| 2906 | 2909 | 2912 | 2915 | 9 |
| 2910 | 2909 | 2912 | 2913 | 9 |
| 2910 | 2909 | 2912 | 2914 | 9 |
| 2910 | 2909 | 2912 | 2915 | 9 |
| 2911 | 2909 | 2912 | 2913 | 9 |
| 2911 | 2909 | 2912 | 2914 | 9 |
| 2911 | 2909 | 2912 | 2915 | 9 |
| 2909 | 2912 | 2915 | 2916 | 9 |
| 2909 | 2912 | 2915 | 2920 | 9 |
| 2909 | 2912 | 2915 | 2924 | 9 |
| 2913 | 2912 | 2915 | 2916 | 9 |
| 2913 | 2912 | 2915 | 2920 | 9 |
| 2913 | 2912 | 2915 | 2924 | 9 |
| 2914 | 2912 | 2915 | 2916 | 9 |
| 2914 | 2912 | 2915 | 2920 | 9 |
| 2914 | 2912 | 2915 | 2924 | 9 |
| 2912 | 2915 | 2916 | 2917 | 9 |
| 2912 | 2915 | 2916 | 2918 | 9 |
| 2912 | 2915 | 2916 | 2919 | 9 |
| 2920 | 2915 | 2916 | 2917 | 9 |
| 2920 | 2915 | 2916 | 2918 | 9 |
| 2920 | 2915 | 2916 | 2919 | 9 |
| 2924 | 2915 | 2916 | 2917 | 9 |
| 2924 | 2915 | 2916 | 2918 | 9 |
| 2924 | 2915 | 2916 | 2919 | 9 |
| 2912 | 2915 | 2920 | 2921 | 9 |
| 2912 | 2915 | 2920 | 2922 | 9 |
| 2912 | 2915 | 2920 | 2923 | 9 |
| 2916 | 2915 | 2920 | 2921 | 9 |
| 2916 | 2915 | 2920 | 2922 | 9 |
| 2916 | 2915 | 2920 | 2923 | 9 |
| 2924 | 2915 | 2920 | 2921 | 9 |

|      |      |      |      |   |
|------|------|------|------|---|
| 2924 | 2915 | 2920 | 2922 | 9 |
| 2924 | 2915 | 2920 | 2923 | 9 |
| 2912 | 2915 | 2924 | 2925 | 9 |
| 2912 | 2915 | 2924 | 2926 | 9 |
| 2912 | 2915 | 2924 | 2927 | 9 |
| 2916 | 2915 | 2924 | 2925 | 9 |
| 2916 | 2915 | 2924 | 2926 | 9 |
| 2916 | 2915 | 2924 | 2927 | 9 |
| 2920 | 2915 | 2924 | 2925 | 9 |
| 2920 | 2915 | 2924 | 2926 | 9 |
| 2920 | 2915 | 2924 | 2927 | 9 |
| 2900 | 2928 | 2930 | 2931 | 9 |
| 2900 | 2928 | 2930 | 2932 | 9 |
| 2929 | 2928 | 2930 | 2931 | 9 |
| 2929 | 2928 | 2930 | 2932 | 9 |
| 2933 | 2928 | 2930 | 2931 | 9 |
| 2933 | 2928 | 2930 | 2932 | 9 |
| 2900 | 2928 | 2933 | 2934 | 9 |
| 2900 | 2928 | 2933 | 2935 | 9 |
| 2900 | 2928 | 2933 | 2936 | 9 |
| 2929 | 2928 | 2933 | 2934 | 9 |
| 2929 | 2928 | 2933 | 2935 | 9 |
| 2929 | 2928 | 2933 | 2936 | 9 |
| 2930 | 2928 | 2933 | 2934 | 9 |
| 2930 | 2928 | 2933 | 2935 | 9 |
| 2930 | 2928 | 2933 | 2936 | 9 |
| 2928 | 2933 | 2936 | 2937 | 9 |
| 2928 | 2933 | 2936 | 2938 | 9 |
| 2928 | 2933 | 2936 | 2963 | 9 |
| 2934 | 2933 | 2936 | 2937 | 9 |
| 2934 | 2933 | 2936 | 2938 | 9 |
| 2934 | 2933 | 2936 | 2963 | 9 |
| 2935 | 2933 | 2936 | 2937 | 9 |
| 2935 | 2933 | 2936 | 2938 | 9 |
| 2935 | 2933 | 2936 | 2963 | 9 |
| 2933 | 2936 | 2938 | 2939 | 9 |
| 2933 | 2936 | 2938 | 2940 | 9 |
| 2933 | 2936 | 2938 | 2941 | 9 |
| 2937 | 2936 | 2938 | 2939 | 9 |
| 2937 | 2936 | 2938 | 2940 | 9 |
| 2937 | 2936 | 2938 | 2941 | 9 |
| 2963 | 2936 | 2938 | 2939 | 9 |
| 2963 | 2936 | 2938 | 2940 | 9 |
| 2963 | 2936 | 2938 | 2941 | 9 |
| 2933 | 2936 | 2963 | 2964 | 9 |
| 2933 | 2936 | 2963 | 2965 | 9 |
| 2933 | 2936 | 2963 | 2991 | 9 |
| 2937 | 2936 | 2963 | 2964 | 9 |
| 2937 | 2936 | 2963 | 2965 | 9 |
| 2937 | 2936 | 2963 | 2991 | 9 |
| 2938 | 2936 | 2963 | 2964 | 9 |
| 2938 | 2936 | 2963 | 2965 | 9 |
| 2938 | 2936 | 2963 | 2991 | 9 |
| 2936 | 2938 | 2941 | 2942 | 9 |

|      |      |      |      |   |
|------|------|------|------|---|
| 2936 | 2938 | 2941 | 2943 | 9 |
| 2936 | 2938 | 2941 | 2944 | 9 |
| 2939 | 2938 | 2941 | 2942 | 9 |
| 2939 | 2938 | 2941 | 2943 | 9 |
| 2939 | 2938 | 2941 | 2944 | 9 |
| 2940 | 2938 | 2941 | 2942 | 9 |
| 2940 | 2938 | 2941 | 2943 | 9 |
| 2940 | 2938 | 2941 | 2944 | 9 |
| 2938 | 2941 | 2944 | 2945 | 9 |
| 2938 | 2941 | 2944 | 2946 | 9 |
| 2938 | 2941 | 2944 | 2947 | 9 |
| 2942 | 2941 | 2944 | 2945 | 9 |
| 2942 | 2941 | 2944 | 2946 | 9 |
| 2942 | 2941 | 2944 | 2947 | 9 |
| 2943 | 2941 | 2944 | 2945 | 9 |
| 2943 | 2941 | 2944 | 2946 | 9 |
| 2943 | 2941 | 2944 | 2947 | 9 |
| 2941 | 2944 | 2947 | 2948 | 9 |
| 2941 | 2944 | 2947 | 2949 | 9 |
| 2941 | 2944 | 2947 | 2950 | 9 |
| 2945 | 2944 | 2947 | 2948 | 9 |
| 2945 | 2944 | 2947 | 2949 | 9 |
| 2945 | 2944 | 2947 | 2950 | 9 |
| 2946 | 2944 | 2947 | 2948 | 9 |
| 2946 | 2944 | 2947 | 2949 | 9 |
| 2946 | 2944 | 2947 | 2950 | 9 |
| 2944 | 2947 | 2950 | 2951 | 9 |
| 2944 | 2947 | 2950 | 2952 | 9 |
| 2944 | 2947 | 2950 | 2953 | 9 |
| 2948 | 2947 | 2950 | 2951 | 9 |
| 2948 | 2947 | 2950 | 2952 | 9 |
| 2948 | 2947 | 2950 | 2953 | 9 |
| 2949 | 2947 | 2950 | 2951 | 9 |
| 2949 | 2947 | 2950 | 2952 | 9 |
| 2949 | 2947 | 2950 | 2953 | 9 |
| 2947 | 2950 | 2953 | 2954 | 9 |
| 2947 | 2950 | 2953 | 2955 | 9 |
| 2947 | 2950 | 2953 | 2956 | 9 |
| 2951 | 2950 | 2953 | 2954 | 9 |
| 2951 | 2950 | 2953 | 2955 | 9 |
| 2951 | 2950 | 2953 | 2956 | 9 |
| 2952 | 2950 | 2953 | 2954 | 9 |
| 2952 | 2950 | 2953 | 2955 | 9 |
| 2952 | 2950 | 2953 | 2956 | 9 |
| 2950 | 2953 | 2956 | 2957 | 9 |
| 2950 | 2953 | 2956 | 2958 | 9 |
| 2950 | 2953 | 2956 | 2959 | 9 |
| 2954 | 2953 | 2956 | 2957 | 9 |
| 2954 | 2953 | 2956 | 2958 | 9 |
| 2954 | 2953 | 2956 | 2959 | 9 |
| 2955 | 2953 | 2956 | 2957 | 9 |
| 2955 | 2953 | 2956 | 2958 | 9 |
| 2955 | 2953 | 2956 | 2959 | 9 |
| 2953 | 2956 | 2959 | 2960 | 9 |

|      |      |      |      |   |
|------|------|------|------|---|
| 2953 | 2956 | 2959 | 2961 | 9 |
| 2953 | 2956 | 2959 | 2962 | 9 |
| 2957 | 2956 | 2959 | 2960 | 9 |
| 2957 | 2956 | 2959 | 2961 | 9 |
| 2957 | 2956 | 2959 | 2962 | 9 |
| 2958 | 2956 | 2959 | 2960 | 9 |
| 2958 | 2956 | 2959 | 2961 | 9 |
| 2958 | 2956 | 2959 | 2962 | 9 |
| 2936 | 2963 | 2965 | 2966 | 9 |
| 2936 | 2963 | 2965 | 2967 | 9 |
| 2964 | 2963 | 2965 | 2966 | 9 |
| 2964 | 2963 | 2965 | 2967 | 9 |
| 2991 | 2963 | 2965 | 2966 | 9 |
| 2991 | 2963 | 2965 | 2967 | 9 |
| 2936 | 2963 | 2991 | 2992 | 9 |
| 2936 | 2963 | 2991 | 2993 | 9 |
| 2936 | 2963 | 2991 | 2996 | 9 |
| 2964 | 2963 | 2991 | 2992 | 9 |
| 2964 | 2963 | 2991 | 2993 | 9 |
| 2964 | 2963 | 2991 | 2996 | 9 |
| 2965 | 2963 | 2991 | 2992 | 9 |
| 2965 | 2963 | 2991 | 2993 | 9 |
| 2965 | 2963 | 2991 | 2996 | 9 |
| 2963 | 2965 | 2967 | 2968 | 9 |
| 2963 | 2965 | 2967 | 2969 | 9 |
| 2966 | 2965 | 2967 | 2968 | 9 |
| 2966 | 2965 | 2967 | 2969 | 9 |
| 2965 | 2967 | 2969 | 2970 | 9 |
| 2965 | 2967 | 2969 | 2971 | 9 |
| 2965 | 2967 | 2969 | 2972 | 9 |
| 2968 | 2967 | 2969 | 2970 | 9 |
| 2968 | 2967 | 2969 | 2971 | 9 |
| 2968 | 2967 | 2969 | 2972 | 9 |
| 2967 | 2969 | 2972 | 2973 | 9 |
| 2967 | 2969 | 2972 | 2974 | 9 |
| 2967 | 2969 | 2972 | 2975 | 9 |
| 2970 | 2969 | 2972 | 2973 | 9 |
| 2970 | 2969 | 2972 | 2974 | 9 |
| 2970 | 2969 | 2972 | 2975 | 9 |
| 2971 | 2969 | 2972 | 2973 | 9 |
| 2971 | 2969 | 2972 | 2974 | 9 |
| 2971 | 2969 | 2972 | 2975 | 9 |
| 2969 | 2972 | 2975 | 2976 | 9 |
| 2969 | 2972 | 2975 | 2977 | 9 |
| 2969 | 2972 | 2975 | 2978 | 9 |
| 2973 | 2972 | 2975 | 2976 | 9 |
| 2973 | 2972 | 2975 | 2977 | 9 |
| 2973 | 2972 | 2975 | 2978 | 9 |
| 2974 | 2972 | 2975 | 2976 | 9 |
| 2974 | 2972 | 2975 | 2977 | 9 |
| 2974 | 2972 | 2975 | 2978 | 9 |
| 2972 | 2975 | 2978 | 2979 | 9 |
| 2972 | 2975 | 2978 | 2983 | 9 |
| 2972 | 2975 | 2978 | 2987 | 9 |



|      |      |      |      |   |
|------|------|------|------|---|
| 2976 | 2975 | 2978 | 2979 | 9 |
| 2976 | 2975 | 2978 | 2983 | 9 |
| 2976 | 2975 | 2978 | 2987 | 9 |
| 2977 | 2975 | 2978 | 2979 | 9 |
| 2977 | 2975 | 2978 | 2983 | 9 |
| 2977 | 2975 | 2978 | 2987 | 9 |
| 2975 | 2978 | 2979 | 2980 | 9 |
| 2975 | 2978 | 2979 | 2981 | 9 |
| 2975 | 2978 | 2979 | 2982 | 9 |
| 2983 | 2978 | 2979 | 2980 | 9 |
| 2983 | 2978 | 2979 | 2981 | 9 |
| 2983 | 2978 | 2979 | 2982 | 9 |
| 2987 | 2978 | 2979 | 2980 | 9 |
| 2987 | 2978 | 2979 | 2981 | 9 |
| 2987 | 2978 | 2979 | 2982 | 9 |
| 2975 | 2978 | 2983 | 2984 | 9 |
| 2975 | 2978 | 2983 | 2985 | 9 |
| 2975 | 2978 | 2983 | 2986 | 9 |
| 2979 | 2978 | 2983 | 2984 | 9 |
| 2979 | 2978 | 2983 | 2985 | 9 |
| 2979 | 2978 | 2983 | 2986 | 9 |
| 2987 | 2978 | 2983 | 2984 | 9 |
| 2987 | 2978 | 2983 | 2985 | 9 |
| 2987 | 2978 | 2983 | 2986 | 9 |
| 2975 | 2978 | 2987 | 2988 | 9 |
| 2975 | 2978 | 2987 | 2989 | 9 |
| 2975 | 2978 | 2987 | 2990 | 9 |
| 2979 | 2978 | 2987 | 2988 | 9 |
| 2979 | 2978 | 2987 | 2989 | 9 |
| 2979 | 2978 | 2987 | 2990 | 9 |
| 2983 | 2978 | 2987 | 2988 | 9 |
| 2983 | 2978 | 2987 | 2989 | 9 |
| 2983 | 2978 | 2987 | 2990 | 9 |
| 2963 | 2991 | 2993 | 2994 | 9 |
| 2963 | 2991 | 2993 | 2995 | 9 |
| 2992 | 2991 | 2993 | 2994 | 9 |
| 2992 | 2991 | 2993 | 2995 | 9 |
| 2996 | 2991 | 2993 | 2994 | 9 |
| 2996 | 2991 | 2993 | 2995 | 9 |
| 2963 | 2991 | 2996 | 2997 | 9 |
| 2963 | 2991 | 2996 | 2998 | 9 |
| 2963 | 2991 | 2996 | 2999 | 9 |
| 2992 | 2991 | 2996 | 2997 | 9 |
| 2992 | 2991 | 2996 | 2998 | 9 |
| 2992 | 2991 | 2996 | 2999 | 9 |
| 2993 | 2991 | 2996 | 2997 | 9 |
| 2993 | 2991 | 2996 | 2998 | 9 |
| 2993 | 2991 | 2996 | 2999 | 9 |
| 2991 | 2996 | 2999 | 3000 | 9 |
| 2991 | 2996 | 2999 | 3001 | 9 |
| 2991 | 2996 | 2999 | 3026 | 9 |
| 2997 | 2996 | 2999 | 3000 | 9 |
| 2997 | 2996 | 2999 | 3001 | 9 |
| 2997 | 2996 | 2999 | 3026 | 9 |

|      |      |      |      |   |
|------|------|------|------|---|
| 2998 | 2996 | 2999 | 3000 | 9 |
| 2998 | 2996 | 2999 | 3001 | 9 |
| 2998 | 2996 | 2999 | 3026 | 9 |
| 2996 | 2999 | 3001 | 3002 | 9 |
| 2996 | 2999 | 3001 | 3003 | 9 |
| 2996 | 2999 | 3001 | 3004 | 9 |
| 3000 | 2999 | 3001 | 3002 | 9 |
| 3000 | 2999 | 3001 | 3003 | 9 |
| 3000 | 2999 | 3001 | 3004 | 9 |
| 3026 | 2999 | 3001 | 3002 | 9 |
| 3026 | 2999 | 3001 | 3003 | 9 |
| 3026 | 2999 | 3001 | 3004 | 9 |
| 2996 | 2999 | 3026 | 3027 | 9 |
| 2996 | 2999 | 3026 | 3028 | 9 |
| 2996 | 2999 | 3026 | 3054 | 9 |
| 3000 | 2999 | 3026 | 3027 | 9 |
| 3000 | 2999 | 3026 | 3028 | 9 |
| 3000 | 2999 | 3026 | 3054 | 9 |
| 3001 | 2999 | 3026 | 3027 | 9 |
| 3001 | 2999 | 3026 | 3028 | 9 |
| 3001 | 2999 | 3026 | 3054 | 9 |
| 2999 | 3001 | 3004 | 3005 | 9 |
| 2999 | 3001 | 3004 | 3006 | 9 |
| 2999 | 3001 | 3004 | 3007 | 9 |
| 3002 | 3001 | 3004 | 3005 | 9 |
| 3002 | 3001 | 3004 | 3006 | 9 |
| 3002 | 3001 | 3004 | 3007 | 9 |
| 3003 | 3001 | 3004 | 3005 | 9 |
| 3003 | 3001 | 3004 | 3006 | 9 |
| 3003 | 3001 | 3004 | 3007 | 9 |
| 3001 | 3004 | 3007 | 3008 | 9 |
| 3001 | 3004 | 3007 | 3009 | 9 |
| 3001 | 3004 | 3007 | 3010 | 9 |
| 3005 | 3004 | 3007 | 3008 | 9 |
| 3005 | 3004 | 3007 | 3009 | 9 |
| 3005 | 3004 | 3007 | 3010 | 9 |
| 3006 | 3004 | 3007 | 3008 | 9 |
| 3006 | 3004 | 3007 | 3009 | 9 |
| 3006 | 3004 | 3007 | 3010 | 9 |
| 3004 | 3007 | 3010 | 3011 | 9 |
| 3004 | 3007 | 3010 | 3012 | 9 |
| 3004 | 3007 | 3010 | 3013 | 9 |
| 3008 | 3007 | 3010 | 3011 | 9 |
| 3008 | 3007 | 3010 | 3012 | 9 |
| 3008 | 3007 | 3010 | 3013 | 9 |
| 3009 | 3007 | 3010 | 3011 | 9 |
| 3009 | 3007 | 3010 | 3012 | 9 |
| 3009 | 3007 | 3010 | 3013 | 9 |
| 3007 | 3010 | 3013 | 3014 | 9 |
| 3007 | 3010 | 3013 | 3015 | 9 |
| 3007 | 3010 | 3013 | 3016 | 9 |
| 3011 | 3010 | 3013 | 3014 | 9 |
| 3011 | 3010 | 3013 | 3015 | 9 |
| 3011 | 3010 | 3013 | 3016 | 9 |

|      |      |      |      |   |
|------|------|------|------|---|
| 3012 | 3010 | 3013 | 3014 | 9 |
| 3012 | 3010 | 3013 | 3015 | 9 |
| 3012 | 3010 | 3013 | 3016 | 9 |
| 3010 | 3013 | 3016 | 3017 | 9 |
| 3010 | 3013 | 3016 | 3018 | 9 |
| 3010 | 3013 | 3016 | 3019 | 9 |
| 3014 | 3013 | 3016 | 3017 | 9 |
| 3014 | 3013 | 3016 | 3018 | 9 |
| 3014 | 3013 | 3016 | 3019 | 9 |
| 3015 | 3013 | 3016 | 3017 | 9 |
| 3015 | 3013 | 3016 | 3018 | 9 |
| 3015 | 3013 | 3016 | 3019 | 9 |
| 3013 | 3016 | 3019 | 3020 | 9 |
| 3013 | 3016 | 3019 | 3021 | 9 |
| 3013 | 3016 | 3019 | 3022 | 9 |
| 3017 | 3016 | 3019 | 3020 | 9 |
| 3017 | 3016 | 3019 | 3021 | 9 |
| 3017 | 3016 | 3019 | 3022 | 9 |
| 3018 | 3016 | 3019 | 3020 | 9 |
| 3018 | 3016 | 3019 | 3021 | 9 |
| 3018 | 3016 | 3019 | 3022 | 9 |
| 3016 | 3019 | 3022 | 3023 | 9 |
| 3016 | 3019 | 3022 | 3024 | 9 |
| 3016 | 3019 | 3022 | 3025 | 9 |
| 3020 | 3019 | 3022 | 3023 | 9 |
| 3020 | 3019 | 3022 | 3024 | 9 |
| 3020 | 3019 | 3022 | 3025 | 9 |
| 3021 | 3019 | 3022 | 3023 | 9 |
| 3021 | 3019 | 3022 | 3024 | 9 |
| 3021 | 3019 | 3022 | 3025 | 9 |
| 2999 | 3026 | 3028 | 3029 | 9 |
| 2999 | 3026 | 3028 | 3030 | 9 |
| 3027 | 3026 | 3028 | 3029 | 9 |
| 3027 | 3026 | 3028 | 3030 | 9 |
| 3054 | 3026 | 3028 | 3029 | 9 |
| 3054 | 3026 | 3028 | 3030 | 9 |
| 2999 | 3026 | 3054 | 3055 | 9 |
| 2999 | 3026 | 3054 | 3056 | 9 |
| 2999 | 3026 | 3054 | 3059 | 9 |
| 3027 | 3026 | 3054 | 3055 | 9 |
| 3027 | 3026 | 3054 | 3056 | 9 |
| 3027 | 3026 | 3054 | 3059 | 9 |
| 3028 | 3026 | 3054 | 3055 | 9 |
| 3028 | 3026 | 3054 | 3056 | 9 |
| 3028 | 3026 | 3054 | 3059 | 9 |
| 3026 | 3028 | 3030 | 3031 | 9 |
| 3026 | 3028 | 3030 | 3032 | 9 |
| 3029 | 3028 | 3030 | 3031 | 9 |
| 3029 | 3028 | 3030 | 3032 | 9 |
| 3028 | 3030 | 3032 | 3033 | 9 |
| 3028 | 3030 | 3032 | 3034 | 9 |
| 3028 | 3030 | 3032 | 3035 | 9 |
| 3031 | 3030 | 3032 | 3033 | 9 |
| 3031 | 3030 | 3032 | 3034 | 9 |

|      |      |      |      |   |
|------|------|------|------|---|
| 3031 | 3030 | 3032 | 3035 | 9 |
| 3030 | 3032 | 3035 | 3036 | 9 |
| 3030 | 3032 | 3035 | 3037 | 9 |
| 3030 | 3032 | 3035 | 3038 | 9 |
| 3033 | 3032 | 3035 | 3036 | 9 |
| 3033 | 3032 | 3035 | 3037 | 9 |
| 3033 | 3032 | 3035 | 3038 | 9 |
| 3034 | 3032 | 3035 | 3036 | 9 |
| 3034 | 3032 | 3035 | 3037 | 9 |
| 3034 | 3032 | 3035 | 3038 | 9 |
| 3032 | 3035 | 3038 | 3039 | 9 |
| 3032 | 3035 | 3038 | 3040 | 9 |
| 3032 | 3035 | 3038 | 3041 | 9 |
| 3036 | 3035 | 3038 | 3039 | 9 |
| 3036 | 3035 | 3038 | 3040 | 9 |
| 3036 | 3035 | 3038 | 3041 | 9 |
| 3037 | 3035 | 3038 | 3039 | 9 |
| 3037 | 3035 | 3038 | 3040 | 9 |
| 3037 | 3035 | 3038 | 3041 | 9 |
| 3035 | 3038 | 3041 | 3042 | 9 |
| 3035 | 3038 | 3041 | 3046 | 9 |
| 3035 | 3038 | 3041 | 3050 | 9 |
| 3039 | 3038 | 3041 | 3042 | 9 |
| 3039 | 3038 | 3041 | 3046 | 9 |
| 3039 | 3038 | 3041 | 3050 | 9 |
| 3040 | 3038 | 3041 | 3042 | 9 |
| 3040 | 3038 | 3041 | 3046 | 9 |
| 3040 | 3038 | 3041 | 3050 | 9 |
| 3038 | 3041 | 3042 | 3043 | 9 |
| 3038 | 3041 | 3042 | 3044 | 9 |
| 3038 | 3041 | 3042 | 3045 | 9 |
| 3046 | 3041 | 3042 | 3043 | 9 |
| 3046 | 3041 | 3042 | 3044 | 9 |
| 3046 | 3041 | 3042 | 3045 | 9 |
| 3050 | 3041 | 3042 | 3043 | 9 |
| 3050 | 3041 | 3042 | 3044 | 9 |
| 3050 | 3041 | 3042 | 3045 | 9 |
| 3038 | 3041 | 3046 | 3047 | 9 |
| 3038 | 3041 | 3046 | 3048 | 9 |
| 3038 | 3041 | 3046 | 3049 | 9 |
| 3042 | 3041 | 3046 | 3047 | 9 |
| 3042 | 3041 | 3046 | 3048 | 9 |
| 3042 | 3041 | 3046 | 3049 | 9 |
| 3050 | 3041 | 3046 | 3047 | 9 |
| 3050 | 3041 | 3046 | 3048 | 9 |
| 3050 | 3041 | 3046 | 3049 | 9 |
| 3038 | 3041 | 3050 | 3051 | 9 |
| 3038 | 3041 | 3050 | 3052 | 9 |
| 3038 | 3041 | 3050 | 3053 | 9 |
| 3042 | 3041 | 3050 | 3051 | 9 |
| 3042 | 3041 | 3050 | 3052 | 9 |
| 3042 | 3041 | 3050 | 3053 | 9 |
| 3046 | 3041 | 3050 | 3051 | 9 |
| 3046 | 3041 | 3050 | 3052 | 9 |

|      |      |      |      |   |
|------|------|------|------|---|
| 3046 | 3041 | 3050 | 3053 | 9 |
| 3026 | 3054 | 3056 | 3057 | 9 |
| 3026 | 3054 | 3056 | 3058 | 9 |
| 3055 | 3054 | 3056 | 3057 | 9 |
| 3055 | 3054 | 3056 | 3058 | 9 |
| 3059 | 3054 | 3056 | 3057 | 9 |
| 3059 | 3054 | 3056 | 3058 | 9 |
| 3026 | 3054 | 3059 | 3060 | 9 |
| 3026 | 3054 | 3059 | 3061 | 9 |
| 3026 | 3054 | 3059 | 3062 | 9 |
| 3055 | 3054 | 3059 | 3060 | 9 |
| 3055 | 3054 | 3059 | 3061 | 9 |
| 3055 | 3054 | 3059 | 3062 | 9 |
| 3056 | 3054 | 3059 | 3060 | 9 |
| 3056 | 3054 | 3059 | 3061 | 9 |
| 3056 | 3054 | 3059 | 3062 | 9 |
| 3054 | 3059 | 3062 | 3063 | 9 |
| 3054 | 3059 | 3062 | 3064 | 9 |
| 3054 | 3059 | 3062 | 3089 | 9 |
| 3060 | 3059 | 3062 | 3063 | 9 |
| 3060 | 3059 | 3062 | 3064 | 9 |
| 3060 | 3059 | 3062 | 3089 | 9 |
| 3061 | 3059 | 3062 | 3063 | 9 |
| 3061 | 3059 | 3062 | 3064 | 9 |
| 3061 | 3059 | 3062 | 3089 | 9 |
| 3059 | 3062 | 3064 | 3065 | 9 |
| 3059 | 3062 | 3064 | 3066 | 9 |
| 3059 | 3062 | 3064 | 3067 | 9 |
| 3063 | 3062 | 3064 | 3065 | 9 |
| 3063 | 3062 | 3064 | 3066 | 9 |
| 3063 | 3062 | 3064 | 3067 | 9 |
| 3089 | 3062 | 3064 | 3065 | 9 |
| 3089 | 3062 | 3064 | 3066 | 9 |
| 3089 | 3062 | 3064 | 3067 | 9 |
| 3059 | 3062 | 3089 | 3090 | 9 |
| 3059 | 3062 | 3089 | 3091 | 9 |
| 3059 | 3062 | 3089 | 3117 | 9 |
| 3063 | 3062 | 3089 | 3090 | 9 |
| 3063 | 3062 | 3089 | 3091 | 9 |
| 3063 | 3062 | 3089 | 3117 | 9 |
| 3064 | 3062 | 3089 | 3090 | 9 |
| 3064 | 3062 | 3089 | 3091 | 9 |
| 3064 | 3062 | 3089 | 3117 | 9 |
| 3062 | 3064 | 3067 | 3068 | 9 |
| 3062 | 3064 | 3067 | 3069 | 9 |
| 3062 | 3064 | 3067 | 3070 | 9 |
| 3065 | 3064 | 3067 | 3068 | 9 |
| 3065 | 3064 | 3067 | 3069 | 9 |
| 3065 | 3064 | 3067 | 3070 | 9 |
| 3066 | 3064 | 3067 | 3068 | 9 |
| 3066 | 3064 | 3067 | 3069 | 9 |
| 3066 | 3064 | 3067 | 3070 | 9 |
| 3064 | 3067 | 3070 | 3071 | 9 |
| 3064 | 3067 | 3070 | 3072 | 9 |

|      |      |      |      |   |
|------|------|------|------|---|
| 3064 | 3067 | 3070 | 3073 | 9 |
| 3068 | 3067 | 3070 | 3071 | 9 |
| 3068 | 3067 | 3070 | 3072 | 9 |
| 3068 | 3067 | 3070 | 3073 | 9 |
| 3069 | 3067 | 3070 | 3071 | 9 |
| 3069 | 3067 | 3070 | 3072 | 9 |
| 3069 | 3067 | 3070 | 3073 | 9 |
| 3067 | 3070 | 3073 | 3074 | 9 |
| 3067 | 3070 | 3073 | 3075 | 9 |
| 3067 | 3070 | 3073 | 3076 | 9 |
| 3071 | 3070 | 3073 | 3074 | 9 |
| 3071 | 3070 | 3073 | 3075 | 9 |
| 3071 | 3070 | 3073 | 3076 | 9 |
| 3072 | 3070 | 3073 | 3074 | 9 |
| 3072 | 3070 | 3073 | 3075 | 9 |
| 3072 | 3070 | 3073 | 3076 | 9 |
| 3070 | 3073 | 3076 | 3077 | 9 |
| 3070 | 3073 | 3076 | 3078 | 9 |
| 3070 | 3073 | 3076 | 3079 | 9 |
| 3074 | 3073 | 3076 | 3077 | 9 |
| 3074 | 3073 | 3076 | 3078 | 9 |
| 3074 | 3073 | 3076 | 3079 | 9 |
| 3075 | 3073 | 3076 | 3077 | 9 |
| 3075 | 3073 | 3076 | 3078 | 9 |
| 3075 | 3073 | 3076 | 3079 | 9 |
| 3073 | 3076 | 3079 | 3080 | 9 |
| 3073 | 3076 | 3079 | 3081 | 9 |
| 3073 | 3076 | 3079 | 3082 | 9 |
| 3077 | 3076 | 3079 | 3080 | 9 |
| 3077 | 3076 | 3079 | 3081 | 9 |
| 3077 | 3076 | 3079 | 3082 | 9 |
| 3078 | 3076 | 3079 | 3080 | 9 |
| 3078 | 3076 | 3079 | 3081 | 9 |
| 3078 | 3076 | 3079 | 3082 | 9 |
| 3076 | 3079 | 3082 | 3083 | 9 |
| 3076 | 3079 | 3082 | 3084 | 9 |
| 3076 | 3079 | 3082 | 3085 | 9 |
| 3080 | 3079 | 3082 | 3083 | 9 |
| 3080 | 3079 | 3082 | 3084 | 9 |
| 3080 | 3079 | 3082 | 3085 | 9 |
| 3081 | 3079 | 3082 | 3083 | 9 |
| 3081 | 3079 | 3082 | 3084 | 9 |
| 3081 | 3079 | 3082 | 3085 | 9 |
| 3079 | 3082 | 3085 | 3086 | 9 |
| 3079 | 3082 | 3085 | 3087 | 9 |
| 3079 | 3082 | 3085 | 3088 | 9 |
| 3083 | 3082 | 3085 | 3086 | 9 |
| 3083 | 3082 | 3085 | 3087 | 9 |
| 3083 | 3082 | 3085 | 3088 | 9 |
| 3084 | 3082 | 3085 | 3086 | 9 |
| 3084 | 3082 | 3085 | 3087 | 9 |
| 3084 | 3082 | 3085 | 3088 | 9 |
| 3062 | 3089 | 3091 | 3092 | 9 |
| 3062 | 3089 | 3091 | 3093 | 9 |

|      |      |      |      |   |
|------|------|------|------|---|
| 3090 | 3089 | 3091 | 3092 | 9 |
| 3090 | 3089 | 3091 | 3093 | 9 |
| 3117 | 3089 | 3091 | 3092 | 9 |
| 3117 | 3089 | 3091 | 3093 | 9 |
| 3062 | 3089 | 3117 | 3118 | 9 |
| 3062 | 3089 | 3117 | 3119 | 9 |
| 3062 | 3089 | 3117 | 3122 | 9 |
| 3090 | 3089 | 3117 | 3118 | 9 |
| 3090 | 3089 | 3117 | 3119 | 9 |
| 3090 | 3089 | 3117 | 3122 | 9 |
| 3091 | 3089 | 3117 | 3118 | 9 |
| 3091 | 3089 | 3117 | 3119 | 9 |
| 3091 | 3089 | 3117 | 3122 | 9 |
| 3089 | 3091 | 3093 | 3094 | 9 |
| 3089 | 3091 | 3093 | 3095 | 9 |
| 3092 | 3091 | 3093 | 3094 | 9 |
| 3092 | 3091 | 3093 | 3095 | 9 |
| 3091 | 3093 | 3095 | 3096 | 9 |
| 3091 | 3093 | 3095 | 3097 | 9 |
| 3091 | 3093 | 3095 | 3098 | 9 |
| 3094 | 3093 | 3095 | 3096 | 9 |
| 3094 | 3093 | 3095 | 3097 | 9 |
| 3094 | 3093 | 3095 | 3098 | 9 |
| 3093 | 3095 | 3098 | 3099 | 9 |
| 3093 | 3095 | 3098 | 3100 | 9 |
| 3093 | 3095 | 3098 | 3101 | 9 |
| 3096 | 3095 | 3098 | 3099 | 9 |
| 3096 | 3095 | 3098 | 3100 | 9 |
| 3096 | 3095 | 3098 | 3101 | 9 |
| 3097 | 3095 | 3098 | 3099 | 9 |
| 3097 | 3095 | 3098 | 3100 | 9 |
| 3097 | 3095 | 3098 | 3101 | 9 |
| 3095 | 3098 | 3101 | 3102 | 9 |
| 3095 | 3098 | 3101 | 3103 | 9 |
| 3095 | 3098 | 3101 | 3104 | 9 |
| 3099 | 3098 | 3101 | 3102 | 9 |
| 3099 | 3098 | 3101 | 3103 | 9 |
| 3099 | 3098 | 3101 | 3104 | 9 |
| 3100 | 3098 | 3101 | 3102 | 9 |
| 3100 | 3098 | 3101 | 3103 | 9 |
| 3100 | 3098 | 3101 | 3104 | 9 |
| 3098 | 3101 | 3104 | 3105 | 9 |
| 3098 | 3101 | 3104 | 3109 | 9 |
| 3098 | 3101 | 3104 | 3113 | 9 |
| 3102 | 3101 | 3104 | 3105 | 9 |
| 3102 | 3101 | 3104 | 3109 | 9 |
| 3102 | 3101 | 3104 | 3113 | 9 |
| 3103 | 3101 | 3104 | 3105 | 9 |
| 3103 | 3101 | 3104 | 3109 | 9 |
| 3103 | 3101 | 3104 | 3113 | 9 |
| 3101 | 3104 | 3105 | 3106 | 9 |
| 3101 | 3104 | 3105 | 3107 | 9 |
| 3101 | 3104 | 3105 | 3108 | 9 |
| 3109 | 3104 | 3105 | 3106 | 9 |

|      |      |      |      |   |
|------|------|------|------|---|
| 3109 | 3104 | 3105 | 3107 | 9 |
| 3109 | 3104 | 3105 | 3108 | 9 |
| 3113 | 3104 | 3105 | 3106 | 9 |
| 3113 | 3104 | 3105 | 3107 | 9 |
| 3113 | 3104 | 3105 | 3108 | 9 |
| 3101 | 3104 | 3109 | 3110 | 9 |
| 3101 | 3104 | 3109 | 3111 | 9 |
| 3101 | 3104 | 3109 | 3112 | 9 |
| 3105 | 3104 | 3109 | 3110 | 9 |
| 3105 | 3104 | 3109 | 3111 | 9 |
| 3105 | 3104 | 3109 | 3112 | 9 |
| 3113 | 3104 | 3109 | 3110 | 9 |
| 3113 | 3104 | 3109 | 3111 | 9 |
| 3113 | 3104 | 3109 | 3112 | 9 |
| 3101 | 3104 | 3113 | 3114 | 9 |
| 3101 | 3104 | 3113 | 3115 | 9 |
| 3101 | 3104 | 3113 | 3116 | 9 |
| 3105 | 3104 | 3113 | 3114 | 9 |
| 3105 | 3104 | 3113 | 3115 | 9 |
| 3105 | 3104 | 3113 | 3116 | 9 |
| 3109 | 3104 | 3113 | 3114 | 9 |
| 3109 | 3104 | 3113 | 3115 | 9 |
| 3109 | 3104 | 3113 | 3116 | 9 |
| 3089 | 3117 | 3119 | 3120 | 9 |
| 3089 | 3117 | 3119 | 3121 | 9 |
| 3118 | 3117 | 3119 | 3120 | 9 |
| 3118 | 3117 | 3119 | 3121 | 9 |
| 3122 | 3117 | 3119 | 3120 | 9 |
| 3122 | 3117 | 3119 | 3121 | 9 |
| 3089 | 3117 | 3122 | 3123 | 9 |
| 3089 | 3117 | 3122 | 3124 | 9 |
| 3089 | 3117 | 3122 | 3125 | 9 |
| 3118 | 3117 | 3122 | 3123 | 9 |
| 3118 | 3117 | 3122 | 3124 | 9 |
| 3118 | 3117 | 3122 | 3125 | 9 |
| 3119 | 3117 | 3122 | 3123 | 9 |
| 3119 | 3117 | 3122 | 3124 | 9 |
| 3119 | 3117 | 3122 | 3125 | 9 |
| 3117 | 3122 | 3125 | 3126 | 9 |
| 3117 | 3122 | 3125 | 3127 | 9 |
| 3117 | 3122 | 3125 | 3152 | 9 |
| 3123 | 3122 | 3125 | 3126 | 9 |
| 3123 | 3122 | 3125 | 3127 | 9 |
| 3123 | 3122 | 3125 | 3152 | 9 |
| 3124 | 3122 | 3125 | 3126 | 9 |
| 3124 | 3122 | 3125 | 3127 | 9 |
| 3124 | 3122 | 3125 | 3152 | 9 |
| 3122 | 3125 | 3127 | 3128 | 9 |
| 3122 | 3125 | 3127 | 3129 | 9 |
| 3122 | 3125 | 3127 | 3130 | 9 |
| 3126 | 3125 | 3127 | 3128 | 9 |
| 3126 | 3125 | 3127 | 3129 | 9 |
| 3126 | 3125 | 3127 | 3130 | 9 |
| 3152 | 3125 | 3127 | 3128 | 9 |



|      |      |      |      |   |
|------|------|------|------|---|
| 3152 | 3125 | 3127 | 3129 | 9 |
| 3152 | 3125 | 3127 | 3130 | 9 |
| 3122 | 3125 | 3152 | 3153 | 9 |
| 3122 | 3125 | 3152 | 3154 | 9 |
| 3122 | 3125 | 3152 | 3180 | 9 |
| 3126 | 3125 | 3152 | 3153 | 9 |
| 3126 | 3125 | 3152 | 3154 | 9 |
| 3126 | 3125 | 3152 | 3180 | 9 |
| 3127 | 3125 | 3152 | 3153 | 9 |
| 3127 | 3125 | 3152 | 3154 | 9 |
| 3127 | 3125 | 3152 | 3180 | 9 |
| 3125 | 3127 | 3130 | 3131 | 9 |
| 3125 | 3127 | 3130 | 3132 | 9 |
| 3125 | 3127 | 3130 | 3133 | 9 |
| 3128 | 3127 | 3130 | 3131 | 9 |
| 3128 | 3127 | 3130 | 3132 | 9 |
| 3128 | 3127 | 3130 | 3133 | 9 |
| 3129 | 3127 | 3130 | 3131 | 9 |
| 3129 | 3127 | 3130 | 3132 | 9 |
| 3129 | 3127 | 3130 | 3133 | 9 |
| 3127 | 3130 | 3133 | 3134 | 9 |
| 3127 | 3130 | 3133 | 3135 | 9 |
| 3127 | 3130 | 3133 | 3136 | 9 |
| 3131 | 3130 | 3133 | 3134 | 9 |
| 3131 | 3130 | 3133 | 3135 | 9 |
| 3131 | 3130 | 3133 | 3136 | 9 |
| 3132 | 3130 | 3133 | 3134 | 9 |
| 3132 | 3130 | 3133 | 3135 | 9 |
| 3132 | 3130 | 3133 | 3136 | 9 |
| 3130 | 3133 | 3136 | 3137 | 9 |
| 3130 | 3133 | 3136 | 3138 | 9 |
| 3130 | 3133 | 3136 | 3139 | 9 |
| 3134 | 3133 | 3136 | 3137 | 9 |
| 3134 | 3133 | 3136 | 3138 | 9 |
| 3134 | 3133 | 3136 | 3139 | 9 |
| 3135 | 3133 | 3136 | 3137 | 9 |
| 3135 | 3133 | 3136 | 3138 | 9 |
| 3135 | 3133 | 3136 | 3139 | 9 |
| 3133 | 3136 | 3139 | 3140 | 9 |
| 3133 | 3136 | 3139 | 3141 | 9 |
| 3133 | 3136 | 3139 | 3142 | 9 |
| 3137 | 3136 | 3139 | 3140 | 9 |
| 3137 | 3136 | 3139 | 3141 | 9 |
| 3137 | 3136 | 3139 | 3142 | 9 |
| 3138 | 3136 | 3139 | 3140 | 9 |
| 3138 | 3136 | 3139 | 3141 | 9 |
| 3138 | 3136 | 3139 | 3142 | 9 |
| 3136 | 3139 | 3142 | 3143 | 9 |
| 3136 | 3139 | 3142 | 3144 | 9 |
| 3136 | 3139 | 3142 | 3145 | 9 |
| 3140 | 3139 | 3142 | 3143 | 9 |
| 3140 | 3139 | 3142 | 3144 | 9 |
| 3140 | 3139 | 3142 | 3145 | 9 |
| 3141 | 3139 | 3142 | 3143 | 9 |

|      |      |      |      |   |
|------|------|------|------|---|
| 3141 | 3139 | 3142 | 3144 | 9 |
| 3141 | 3139 | 3142 | 3145 | 9 |
| 3139 | 3142 | 3145 | 3146 | 9 |
| 3139 | 3142 | 3145 | 3147 | 9 |
| 3139 | 3142 | 3145 | 3148 | 9 |
| 3143 | 3142 | 3145 | 3146 | 9 |
| 3143 | 3142 | 3145 | 3147 | 9 |
| 3143 | 3142 | 3145 | 3148 | 9 |
| 3144 | 3142 | 3145 | 3146 | 9 |
| 3144 | 3142 | 3145 | 3147 | 9 |
| 3144 | 3142 | 3145 | 3148 | 9 |
| 3142 | 3145 | 3148 | 3149 | 9 |
| 3142 | 3145 | 3148 | 3150 | 9 |
| 3142 | 3145 | 3148 | 3151 | 9 |
| 3146 | 3145 | 3148 | 3149 | 9 |
| 3146 | 3145 | 3148 | 3150 | 9 |
| 3146 | 3145 | 3148 | 3151 | 9 |
| 3147 | 3145 | 3148 | 3149 | 9 |
| 3147 | 3145 | 3148 | 3150 | 9 |
| 3147 | 3145 | 3148 | 3151 | 9 |
| 3125 | 3152 | 3154 | 3155 | 9 |
| 3125 | 3152 | 3154 | 3156 | 9 |
| 3153 | 3152 | 3154 | 3155 | 9 |
| 3153 | 3152 | 3154 | 3156 | 9 |
| 3180 | 3152 | 3154 | 3155 | 9 |
| 3180 | 3152 | 3154 | 3156 | 9 |
| 3125 | 3152 | 3180 | 3181 | 9 |
| 3125 | 3152 | 3180 | 3182 | 9 |
| 3125 | 3152 | 3180 | 3185 | 9 |
| 3153 | 3152 | 3180 | 3181 | 9 |
| 3153 | 3152 | 3180 | 3182 | 9 |
| 3153 | 3152 | 3180 | 3185 | 9 |
| 3154 | 3152 | 3180 | 3181 | 9 |
| 3154 | 3152 | 3180 | 3182 | 9 |
| 3154 | 3152 | 3180 | 3185 | 9 |
| 3152 | 3154 | 3156 | 3157 | 9 |
| 3152 | 3154 | 3156 | 3158 | 9 |
| 3155 | 3154 | 3156 | 3157 | 9 |
| 3155 | 3154 | 3156 | 3158 | 9 |
| 3154 | 3156 | 3158 | 3159 | 9 |
| 3154 | 3156 | 3158 | 3160 | 9 |
| 3154 | 3156 | 3158 | 3161 | 9 |
| 3157 | 3156 | 3158 | 3159 | 9 |
| 3157 | 3156 | 3158 | 3160 | 9 |
| 3157 | 3156 | 3158 | 3161 | 9 |
| 3156 | 3158 | 3161 | 3162 | 9 |
| 3156 | 3158 | 3161 | 3163 | 9 |
| 3156 | 3158 | 3161 | 3164 | 9 |
| 3159 | 3158 | 3161 | 3162 | 9 |
| 3159 | 3158 | 3161 | 3163 | 9 |
| 3159 | 3158 | 3161 | 3164 | 9 |
| 3160 | 3158 | 3161 | 3162 | 9 |
| 3160 | 3158 | 3161 | 3163 | 9 |
| 3160 | 3158 | 3161 | 3164 | 9 |

|      |      |      |      |   |
|------|------|------|------|---|
| 3158 | 3161 | 3164 | 3165 | 9 |
| 3158 | 3161 | 3164 | 3166 | 9 |
| 3158 | 3161 | 3164 | 3167 | 9 |
| 3162 | 3161 | 3164 | 3165 | 9 |
| 3162 | 3161 | 3164 | 3166 | 9 |
| 3162 | 3161 | 3164 | 3167 | 9 |
| 3163 | 3161 | 3164 | 3165 | 9 |
| 3163 | 3161 | 3164 | 3166 | 9 |
| 3163 | 3161 | 3164 | 3167 | 9 |
| 3161 | 3164 | 3167 | 3168 | 9 |
| 3161 | 3164 | 3167 | 3172 | 9 |
| 3161 | 3164 | 3167 | 3176 | 9 |
| 3165 | 3164 | 3167 | 3168 | 9 |
| 3165 | 3164 | 3167 | 3172 | 9 |
| 3165 | 3164 | 3167 | 3176 | 9 |
| 3166 | 3164 | 3167 | 3168 | 9 |
| 3166 | 3164 | 3167 | 3172 | 9 |
| 3166 | 3164 | 3167 | 3176 | 9 |
| 3164 | 3167 | 3168 | 3169 | 9 |
| 3164 | 3167 | 3168 | 3170 | 9 |
| 3164 | 3167 | 3168 | 3171 | 9 |
| 3172 | 3167 | 3168 | 3169 | 9 |
| 3172 | 3167 | 3168 | 3170 | 9 |
| 3172 | 3167 | 3168 | 3171 | 9 |
| 3176 | 3167 | 3168 | 3169 | 9 |
| 3176 | 3167 | 3168 | 3170 | 9 |
| 3176 | 3167 | 3168 | 3171 | 9 |
| 3164 | 3167 | 3172 | 3173 | 9 |
| 3164 | 3167 | 3172 | 3174 | 9 |
| 3164 | 3167 | 3172 | 3175 | 9 |
| 3168 | 3167 | 3172 | 3173 | 9 |
| 3168 | 3167 | 3172 | 3174 | 9 |
| 3168 | 3167 | 3172 | 3175 | 9 |
| 3176 | 3167 | 3172 | 3173 | 9 |
| 3176 | 3167 | 3172 | 3174 | 9 |
| 3176 | 3167 | 3172 | 3175 | 9 |
| 3164 | 3167 | 3176 | 3177 | 9 |
| 3164 | 3167 | 3176 | 3178 | 9 |
| 3164 | 3167 | 3176 | 3179 | 9 |
| 3168 | 3167 | 3176 | 3177 | 9 |
| 3168 | 3167 | 3176 | 3178 | 9 |
| 3168 | 3167 | 3176 | 3179 | 9 |
| 3172 | 3167 | 3176 | 3177 | 9 |
| 3172 | 3167 | 3176 | 3178 | 9 |
| 3172 | 3167 | 3176 | 3179 | 9 |
| 3152 | 3180 | 3182 | 3183 | 9 |
| 3152 | 3180 | 3182 | 3184 | 9 |
| 3181 | 3180 | 3182 | 3183 | 9 |
| 3181 | 3180 | 3182 | 3184 | 9 |
| 3185 | 3180 | 3182 | 3183 | 9 |
| 3185 | 3180 | 3182 | 3184 | 9 |
| 3152 | 3180 | 3185 | 3186 | 9 |
| 3152 | 3180 | 3185 | 3187 | 9 |
| 3152 | 3180 | 3185 | 3188 | 9 |

|      |      |      |      |   |
|------|------|------|------|---|
| 3181 | 3180 | 3185 | 3186 | 9 |
| 3181 | 3180 | 3185 | 3187 | 9 |
| 3181 | 3180 | 3185 | 3188 | 9 |
| 3182 | 3180 | 3185 | 3186 | 9 |
| 3182 | 3180 | 3185 | 3187 | 9 |
| 3182 | 3180 | 3185 | 3188 | 9 |
| 3180 | 3185 | 3188 | 3189 | 9 |
| 3180 | 3185 | 3188 | 3190 | 9 |
| 3180 | 3185 | 3188 | 3215 | 9 |
| 3186 | 3185 | 3188 | 3189 | 9 |
| 3186 | 3185 | 3188 | 3190 | 9 |
| 3186 | 3185 | 3188 | 3215 | 9 |
| 3187 | 3185 | 3188 | 3189 | 9 |
| 3187 | 3185 | 3188 | 3190 | 9 |
| 3187 | 3185 | 3188 | 3215 | 9 |
| 3185 | 3188 | 3190 | 3191 | 9 |
| 3185 | 3188 | 3190 | 3192 | 9 |
| 3185 | 3188 | 3190 | 3193 | 9 |
| 3189 | 3188 | 3190 | 3191 | 9 |
| 3189 | 3188 | 3190 | 3192 | 9 |
| 3189 | 3188 | 3190 | 3193 | 9 |
| 3215 | 3188 | 3190 | 3191 | 9 |
| 3215 | 3188 | 3190 | 3192 | 9 |
| 3215 | 3188 | 3190 | 3193 | 9 |
| 3185 | 3188 | 3215 | 3216 | 9 |
| 3185 | 3188 | 3215 | 3217 | 9 |
| 3185 | 3188 | 3215 | 3243 | 9 |
| 3189 | 3188 | 3215 | 3216 | 9 |
| 3189 | 3188 | 3215 | 3217 | 9 |
| 3189 | 3188 | 3215 | 3243 | 9 |
| 3190 | 3188 | 3215 | 3216 | 9 |
| 3190 | 3188 | 3215 | 3217 | 9 |
| 3190 | 3188 | 3215 | 3243 | 9 |
| 3188 | 3190 | 3193 | 3194 | 9 |
| 3188 | 3190 | 3193 | 3195 | 9 |
| 3188 | 3190 | 3193 | 3196 | 9 |
| 3191 | 3190 | 3193 | 3194 | 9 |
| 3191 | 3190 | 3193 | 3195 | 9 |
| 3191 | 3190 | 3193 | 3196 | 9 |
| 3192 | 3190 | 3193 | 3194 | 9 |
| 3192 | 3190 | 3193 | 3195 | 9 |
| 3192 | 3190 | 3193 | 3196 | 9 |
| 3190 | 3193 | 3196 | 3197 | 9 |
| 3190 | 3193 | 3196 | 3198 | 9 |
| 3190 | 3193 | 3196 | 3199 | 9 |
| 3194 | 3193 | 3196 | 3197 | 9 |
| 3194 | 3193 | 3196 | 3198 | 9 |
| 3194 | 3193 | 3196 | 3199 | 9 |
| 3195 | 3193 | 3196 | 3197 | 9 |
| 3195 | 3193 | 3196 | 3198 | 9 |
| 3195 | 3193 | 3196 | 3199 | 9 |
| 3193 | 3196 | 3199 | 3200 | 9 |
| 3193 | 3196 | 3199 | 3201 | 9 |
| 3193 | 3196 | 3199 | 3202 | 9 |

|      |      |      |      |   |
|------|------|------|------|---|
| 3197 | 3196 | 3199 | 3200 | 9 |
| 3197 | 3196 | 3199 | 3201 | 9 |
| 3197 | 3196 | 3199 | 3202 | 9 |
| 3198 | 3196 | 3199 | 3200 | 9 |
| 3198 | 3196 | 3199 | 3201 | 9 |
| 3198 | 3196 | 3199 | 3202 | 9 |
| 3196 | 3199 | 3202 | 3203 | 9 |
| 3196 | 3199 | 3202 | 3204 | 9 |
| 3196 | 3199 | 3202 | 3205 | 9 |
| 3200 | 3199 | 3202 | 3203 | 9 |
| 3200 | 3199 | 3202 | 3204 | 9 |
| 3200 | 3199 | 3202 | 3205 | 9 |
| 3201 | 3199 | 3202 | 3203 | 9 |
| 3201 | 3199 | 3202 | 3204 | 9 |
| 3201 | 3199 | 3202 | 3205 | 9 |
| 3199 | 3202 | 3205 | 3206 | 9 |
| 3199 | 3202 | 3205 | 3207 | 9 |
| 3199 | 3202 | 3205 | 3208 | 9 |
| 3203 | 3202 | 3205 | 3206 | 9 |
| 3203 | 3202 | 3205 | 3207 | 9 |
| 3203 | 3202 | 3205 | 3208 | 9 |
| 3204 | 3202 | 3205 | 3206 | 9 |
| 3204 | 3202 | 3205 | 3207 | 9 |
| 3204 | 3202 | 3205 | 3208 | 9 |
| 3202 | 3205 | 3208 | 3209 | 9 |
| 3202 | 3205 | 3208 | 3210 | 9 |
| 3202 | 3205 | 3208 | 3211 | 9 |
| 3206 | 3205 | 3208 | 3209 | 9 |
| 3206 | 3205 | 3208 | 3210 | 9 |
| 3206 | 3205 | 3208 | 3211 | 9 |
| 3207 | 3205 | 3208 | 3209 | 9 |
| 3207 | 3205 | 3208 | 3210 | 9 |
| 3207 | 3205 | 3208 | 3211 | 9 |
| 3205 | 3208 | 3211 | 3212 | 9 |
| 3205 | 3208 | 3211 | 3213 | 9 |
| 3205 | 3208 | 3211 | 3214 | 9 |
| 3209 | 3208 | 3211 | 3212 | 9 |
| 3209 | 3208 | 3211 | 3213 | 9 |
| 3209 | 3208 | 3211 | 3214 | 9 |
| 3210 | 3208 | 3211 | 3212 | 9 |
| 3210 | 3208 | 3211 | 3213 | 9 |
| 3210 | 3208 | 3211 | 3214 | 9 |
| 3188 | 3215 | 3217 | 3218 | 9 |
| 3188 | 3215 | 3217 | 3219 | 9 |
| 3216 | 3215 | 3217 | 3218 | 9 |
| 3216 | 3215 | 3217 | 3219 | 9 |
| 3243 | 3215 | 3217 | 3218 | 9 |
| 3243 | 3215 | 3217 | 3219 | 9 |
| 3188 | 3215 | 3243 | 3244 | 9 |
| 3188 | 3215 | 3243 | 3245 | 9 |
| 3188 | 3215 | 3243 | 3248 | 9 |
| 3216 | 3215 | 3243 | 3244 | 9 |
| 3216 | 3215 | 3243 | 3245 | 9 |
| 3216 | 3215 | 3243 | 3248 | 9 |

|      |      |      |      |   |
|------|------|------|------|---|
| 3217 | 3215 | 3243 | 3244 | 9 |
| 3217 | 3215 | 3243 | 3245 | 9 |
| 3217 | 3215 | 3243 | 3248 | 9 |
| 3215 | 3217 | 3219 | 3220 | 9 |
| 3215 | 3217 | 3219 | 3221 | 9 |
| 3218 | 3217 | 3219 | 3220 | 9 |
| 3218 | 3217 | 3219 | 3221 | 9 |
| 3217 | 3219 | 3221 | 3222 | 9 |
| 3217 | 3219 | 3221 | 3223 | 9 |
| 3217 | 3219 | 3221 | 3224 | 9 |
| 3220 | 3219 | 3221 | 3222 | 9 |
| 3220 | 3219 | 3221 | 3223 | 9 |
| 3220 | 3219 | 3221 | 3224 | 9 |
| 3219 | 3221 | 3224 | 3225 | 9 |
| 3219 | 3221 | 3224 | 3226 | 9 |
| 3219 | 3221 | 3224 | 3227 | 9 |
| 3222 | 3221 | 3224 | 3225 | 9 |
| 3222 | 3221 | 3224 | 3226 | 9 |
| 3222 | 3221 | 3224 | 3227 | 9 |
| 3223 | 3221 | 3224 | 3225 | 9 |
| 3223 | 3221 | 3224 | 3226 | 9 |
| 3223 | 3221 | 3224 | 3227 | 9 |
| 3221 | 3224 | 3227 | 3228 | 9 |
| 3221 | 3224 | 3227 | 3229 | 9 |
| 3221 | 3224 | 3227 | 3230 | 9 |
| 3225 | 3224 | 3227 | 3228 | 9 |
| 3225 | 3224 | 3227 | 3229 | 9 |
| 3225 | 3224 | 3227 | 3230 | 9 |
| 3226 | 3224 | 3227 | 3228 | 9 |
| 3226 | 3224 | 3227 | 3229 | 9 |
| 3226 | 3224 | 3227 | 3230 | 9 |
| 3224 | 3227 | 3230 | 3231 | 9 |
| 3224 | 3227 | 3230 | 3235 | 9 |
| 3224 | 3227 | 3230 | 3239 | 9 |
| 3228 | 3227 | 3230 | 3231 | 9 |
| 3228 | 3227 | 3230 | 3235 | 9 |
| 3228 | 3227 | 3230 | 3239 | 9 |
| 3229 | 3227 | 3230 | 3231 | 9 |
| 3229 | 3227 | 3230 | 3235 | 9 |
| 3229 | 3227 | 3230 | 3239 | 9 |
| 3227 | 3230 | 3231 | 3232 | 9 |
| 3227 | 3230 | 3231 | 3233 | 9 |
| 3227 | 3230 | 3231 | 3234 | 9 |
| 3235 | 3230 | 3231 | 3232 | 9 |
| 3235 | 3230 | 3231 | 3233 | 9 |
| 3235 | 3230 | 3231 | 3234 | 9 |
| 3239 | 3230 | 3231 | 3232 | 9 |
| 3239 | 3230 | 3231 | 3233 | 9 |
| 3239 | 3230 | 3231 | 3234 | 9 |
| 3227 | 3230 | 3235 | 3236 | 9 |
| 3227 | 3230 | 3235 | 3237 | 9 |
| 3227 | 3230 | 3235 | 3238 | 9 |
| 3231 | 3230 | 3235 | 3236 | 9 |
| 3231 | 3230 | 3235 | 3237 | 9 |

|      |      |      |      |   |
|------|------|------|------|---|
| 3231 | 3230 | 3235 | 3238 | 9 |
| 3239 | 3230 | 3235 | 3236 | 9 |
| 3239 | 3230 | 3235 | 3237 | 9 |
| 3239 | 3230 | 3235 | 3238 | 9 |
| 3227 | 3230 | 3239 | 3240 | 9 |
| 3227 | 3230 | 3239 | 3241 | 9 |
| 3227 | 3230 | 3239 | 3242 | 9 |
| 3231 | 3230 | 3239 | 3240 | 9 |
| 3231 | 3230 | 3239 | 3241 | 9 |
| 3231 | 3230 | 3239 | 3242 | 9 |
| 3235 | 3230 | 3239 | 3240 | 9 |
| 3235 | 3230 | 3239 | 3241 | 9 |
| 3235 | 3230 | 3239 | 3242 | 9 |
| 3215 | 3243 | 3245 | 3246 | 9 |
| 3215 | 3243 | 3245 | 3247 | 9 |
| 3244 | 3243 | 3245 | 3246 | 9 |
| 3244 | 3243 | 3245 | 3247 | 9 |
| 3248 | 3243 | 3245 | 3246 | 9 |
| 3248 | 3243 | 3245 | 3247 | 9 |
| 3215 | 3243 | 3248 | 3249 | 9 |
| 3215 | 3243 | 3248 | 3250 | 9 |
| 3215 | 3243 | 3248 | 3251 | 9 |
| 3244 | 3243 | 3248 | 3249 | 9 |
| 3244 | 3243 | 3248 | 3250 | 9 |
| 3244 | 3243 | 3248 | 3251 | 9 |
| 3245 | 3243 | 3248 | 3249 | 9 |
| 3245 | 3243 | 3248 | 3250 | 9 |
| 3245 | 3243 | 3248 | 3251 | 9 |
| 3243 | 3248 | 3251 | 3252 | 9 |
| 3243 | 3248 | 3251 | 3253 | 9 |
| 3243 | 3248 | 3251 | 3254 | 9 |
| 3249 | 3248 | 3251 | 3252 | 9 |
| 3249 | 3248 | 3251 | 3253 | 9 |
| 3249 | 3248 | 3251 | 3254 | 9 |
| 3250 | 3248 | 3251 | 3252 | 9 |
| 3250 | 3248 | 3251 | 3253 | 9 |
| 3250 | 3248 | 3251 | 3254 | 9 |
| 3248 | 3251 | 3254 | 3255 | 9 |
| 3248 | 3251 | 3254 | 3256 | 9 |
| 3248 | 3251 | 3254 | 3257 | 9 |
| 3252 | 3251 | 3254 | 3255 | 9 |
| 3252 | 3251 | 3254 | 3256 | 9 |
| 3252 | 3251 | 3254 | 3257 | 9 |
| 3253 | 3251 | 3254 | 3255 | 9 |
| 3253 | 3251 | 3254 | 3256 | 9 |
| 3253 | 3251 | 3254 | 3257 | 9 |
| 3251 | 3254 | 3257 | 3258 | 9 |
| 3251 | 3254 | 3257 | 3259 | 9 |
| 3251 | 3254 | 3257 | 3260 | 9 |
| 3255 | 3254 | 3257 | 3258 | 9 |
| 3255 | 3254 | 3257 | 3259 | 9 |
| 3255 | 3254 | 3257 | 3260 | 9 |
| 3256 | 3254 | 3257 | 3258 | 9 |
| 3256 | 3254 | 3257 | 3259 | 9 |

|      |      |      |      |   |
|------|------|------|------|---|
| 3256 | 3254 | 3257 | 3260 | 9 |
| 3254 | 3257 | 3260 | 3261 | 9 |
| 3254 | 3257 | 3260 | 3262 | 9 |
| 3254 | 3257 | 3260 | 3263 | 9 |
| 3258 | 3257 | 3260 | 3261 | 9 |
| 3258 | 3257 | 3260 | 3262 | 9 |
| 3258 | 3257 | 3260 | 3263 | 9 |
| 3259 | 3257 | 3260 | 3261 | 9 |
| 3259 | 3257 | 3260 | 3262 | 9 |
| 3259 | 3257 | 3260 | 3263 | 9 |
| 3257 | 3260 | 3263 | 3264 | 9 |
| 3257 | 3260 | 3263 | 3265 | 9 |
| 3257 | 3260 | 3263 | 3266 | 9 |
| 3261 | 3260 | 3263 | 3264 | 9 |
| 3261 | 3260 | 3263 | 3265 | 9 |
| 3261 | 3260 | 3263 | 3266 | 9 |
| 3262 | 3260 | 3263 | 3264 | 9 |
| 3262 | 3260 | 3263 | 3265 | 9 |
| 3262 | 3260 | 3263 | 3266 | 9 |
| 3260 | 3263 | 3266 | 3267 | 9 |
| 3260 | 3263 | 3266 | 3268 | 9 |
| 3260 | 3263 | 3266 | 3269 | 9 |
| 3264 | 3263 | 3266 | 3267 | 9 |
| 3264 | 3263 | 3266 | 3268 | 9 |
| 3264 | 3263 | 3266 | 3269 | 9 |
| 3265 | 3263 | 3266 | 3267 | 9 |
| 3265 | 3263 | 3266 | 3268 | 9 |
| 3265 | 3263 | 3266 | 3269 | 9 |
| 3263 | 3266 | 3269 | 3270 | 9 |
| 3263 | 3266 | 3269 | 3271 | 9 |
| 3263 | 3266 | 3269 | 3272 | 9 |
| 3267 | 3266 | 3269 | 3270 | 9 |
| 3267 | 3266 | 3269 | 3271 | 9 |
| 3267 | 3266 | 3269 | 3272 | 9 |
| 3268 | 3266 | 3269 | 3270 | 9 |
| 3268 | 3266 | 3269 | 3271 | 9 |
| 3268 | 3266 | 3269 | 3272 | 9 |
| 3266 | 3269 | 3272 | 3273 | 9 |
| 3266 | 3269 | 3272 | 3274 | 9 |
| 3266 | 3269 | 3272 | 3275 | 9 |
| 3270 | 3269 | 3272 | 3273 | 9 |
| 3270 | 3269 | 3272 | 3274 | 9 |
| 3270 | 3269 | 3272 | 3275 | 9 |
| 3271 | 3269 | 3272 | 3273 | 9 |
| 3271 | 3269 | 3272 | 3274 | 9 |
| 3271 | 3269 | 3272 | 3275 | 9 |
| 3269 | 3272 | 3275 | 3276 | 9 |
| 3269 | 3272 | 3275 | 3277 | 9 |
| 3269 | 3272 | 3275 | 3278 | 9 |
| 3273 | 3272 | 3275 | 3276 | 9 |
| 3273 | 3272 | 3275 | 3277 | 9 |
| 3273 | 3272 | 3275 | 3278 | 9 |
| 3274 | 3272 | 3275 | 3276 | 9 |
| 3274 | 3272 | 3275 | 3277 | 9 |



3274 3272 3275 3278 9

[ dihedrals ]

| ; ai | aj   | ak   | al   | funct | c0 | c1 |
|------|------|------|------|-------|----|----|
| c2   |      | c3   |      |       |    |    |
| 4    | 1    | 6    | 5    | 2     |    |    |
| 6    | 4    | 8    | 7    | 2     |    |    |
| 67   | 65   | 69   | 68   | 2     |    |    |
| 69   | 67   | 71   | 70   | 2     |    |    |
| 130  | 128  | 132  | 131  | 2     |    |    |
| 132  | 130  | 134  | 133  | 2     |    |    |
| 193  | 191  | 195  | 194  | 2     |    |    |
| 195  | 193  | 197  | 196  | 2     |    |    |
| 256  | 254  | 258  | 257  | 2     |    |    |
| 258  | 256  | 260  | 259  | 2     |    |    |
| 319  | 317  | 321  | 320  | 2     |    |    |
| 321  | 319  | 323  | 322  | 2     |    |    |
| 382  | 380  | 384  | 383  | 2     |    |    |
| 384  | 382  | 386  | 385  | 2     |    |    |
| 445  | 443  | 447  | 446  | 2     |    |    |
| 447  | 445  | 449  | 448  | 2     |    |    |
| 508  | 506  | 510  | 509  | 2     |    |    |
| 510  | 508  | 512  | 511  | 2     |    |    |
| 571  | 569  | 573  | 572  | 2     |    |    |
| 573  | 571  | 575  | 574  | 2     |    |    |
| 634  | 632  | 636  | 635  | 2     |    |    |
| 636  | 634  | 638  | 637  | 2     |    |    |
| 697  | 695  | 699  | 698  | 2     |    |    |
| 699  | 697  | 701  | 700  | 2     |    |    |
| 760  | 758  | 762  | 761  | 2     |    |    |
| 762  | 760  | 764  | 763  | 2     |    |    |
| 823  | 821  | 825  | 824  | 2     |    |    |
| 825  | 823  | 827  | 826  | 2     |    |    |
| 886  | 884  | 888  | 887  | 2     |    |    |
| 888  | 886  | 890  | 889  | 2     |    |    |
| 949  | 947  | 951  | 950  | 2     |    |    |
| 951  | 949  | 953  | 952  | 2     |    |    |
| 1012 | 1010 | 1014 | 1013 | 2     |    |    |
| 1014 | 1012 | 1016 | 1015 | 2     |    |    |
| 1075 | 1073 | 1077 | 1076 | 2     |    |    |
| 1077 | 1075 | 1079 | 1078 | 2     |    |    |
| 1138 | 1136 | 1140 | 1139 | 2     |    |    |
| 1140 | 1138 | 1142 | 1141 | 2     |    |    |
| 1201 | 1199 | 1203 | 1202 | 2     |    |    |
| 1203 | 1201 | 1205 | 1204 | 2     |    |    |
| 1264 | 1262 | 1266 | 1265 | 2     |    |    |
| 1266 | 1264 | 1268 | 1267 | 2     |    |    |
| 1327 | 1325 | 1329 | 1328 | 2     |    |    |
| 1329 | 1327 | 1331 | 1330 | 2     |    |    |
| 1390 | 1388 | 1392 | 1391 | 2     |    |    |
| 1392 | 1390 | 1394 | 1393 | 2     |    |    |
| 1453 | 1451 | 1455 | 1454 | 2     |    |    |
| 1455 | 1453 | 1457 | 1456 | 2     |    |    |
| 1516 | 1514 | 1518 | 1517 | 2     |    |    |

|      |      |      |      |   |
|------|------|------|------|---|
| 1518 | 1516 | 1520 | 1519 | 2 |
| 1579 | 1577 | 1581 | 1580 | 2 |
| 1581 | 1579 | 1583 | 1582 | 2 |
| 1642 | 1640 | 1644 | 1643 | 2 |
| 1644 | 1642 | 1646 | 1645 | 2 |
| 1705 | 1703 | 1707 | 1706 | 2 |
| 1707 | 1705 | 1709 | 1708 | 2 |
| 1768 | 1766 | 1770 | 1769 | 2 |
| 1770 | 1768 | 1772 | 1771 | 2 |
| 1831 | 1829 | 1833 | 1832 | 2 |
| 1833 | 1831 | 1835 | 1834 | 2 |
| 1894 | 1892 | 1896 | 1895 | 2 |
| 1896 | 1894 | 1898 | 1897 | 2 |
| 1957 | 1955 | 1959 | 1958 | 2 |
| 1959 | 1957 | 1961 | 1960 | 2 |
| 2020 | 2018 | 2022 | 2021 | 2 |
| 2022 | 2020 | 2024 | 2023 | 2 |
| 2083 | 2081 | 2085 | 2084 | 2 |
| 2085 | 2083 | 2087 | 2086 | 2 |
| 2146 | 2144 | 2148 | 2147 | 2 |
| 2148 | 2146 | 2150 | 2149 | 2 |
| 2209 | 2207 | 2211 | 2210 | 2 |
| 2211 | 2209 | 2213 | 2212 | 2 |
| 2272 | 2270 | 2274 | 2273 | 2 |
| 2274 | 2272 | 2276 | 2275 | 2 |
| 2335 | 2333 | 2337 | 2336 | 2 |
| 2337 | 2335 | 2339 | 2338 | 2 |
| 2398 | 2396 | 2400 | 2399 | 2 |
| 2400 | 2398 | 2402 | 2401 | 2 |
| 2461 | 2459 | 2463 | 2462 | 2 |
| 2463 | 2461 | 2465 | 2464 | 2 |
| 2524 | 2522 | 2526 | 2525 | 2 |
| 2526 | 2524 | 2528 | 2527 | 2 |
| 2587 | 2585 | 2589 | 2588 | 2 |
| 2589 | 2587 | 2591 | 2590 | 2 |
| 2650 | 2648 | 2652 | 2651 | 2 |
| 2652 | 2650 | 2654 | 2653 | 2 |
| 2713 | 2711 | 2715 | 2714 | 2 |
| 2715 | 2713 | 2717 | 2716 | 2 |
| 2776 | 2774 | 2778 | 2777 | 2 |
| 2778 | 2776 | 2780 | 2779 | 2 |
| 2839 | 2837 | 2841 | 2840 | 2 |
| 2841 | 2839 | 2843 | 2842 | 2 |
| 2902 | 2900 | 2904 | 2903 | 2 |
| 2904 | 2902 | 2906 | 2905 | 2 |
| 2965 | 2963 | 2967 | 2966 | 2 |
| 2967 | 2965 | 2969 | 2968 | 2 |
| 3028 | 3026 | 3030 | 3029 | 2 |
| 3030 | 3028 | 3032 | 3031 | 2 |
| 3091 | 3089 | 3093 | 3092 | 2 |
| 3093 | 3091 | 3095 | 3094 | 2 |
| 3154 | 3152 | 3156 | 3155 | 2 |
| 3156 | 3154 | 3158 | 3157 | 2 |
| 3217 | 3215 | 3219 | 3218 | 2 |

3219 3217 3221 3220 2

```
; Include Position restraint file
#ifdef POSRES_PMAL
#include "posre_PMAL.itp"
#endif
```
