# Supplementary material for: A multi-scale molecular dynamics simulation of PMAL facilitated delivery of siRNA
Source: Royal Society of Chemistry journal article supplement (doi:10.1039/c5ra10965e), 2015-01-01
Supplement: c5ra10965e3.pdf [file c5ra10965e3.pdf]

## Supporting Information

### A multi-scale molecular dynamics simulation of PMAL assisted siRNA delivery

Jipeng Li<sup>1</sup>, Yiyun Ouyang<sup>1</sup>, Xian Kong<sup>1</sup>, Jingying Zhu<sup>1</sup>, Diannan Lu<sup>1,\*</sup>, Zheng Liu<sup>1,\*</sup>

<sup>1</sup> Department of Chemical Engineering, Tsinghua University, Beijing, 100084

\* To whom it corresponds: [ludiannan@mail.tsinghua.edu.cn](mailto:ludiannan@mail.tsinghua.edu.cn); [liuzheng@mail.tsinghua.edu.cn](mailto:liuzheng@mail.tsinghua.edu.cn)

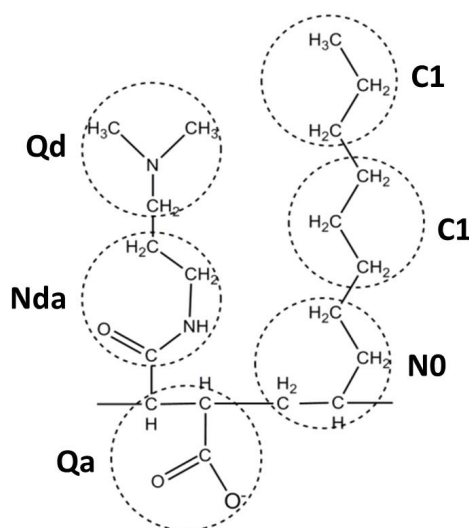

Figure S1. Mapping from all-atom model to coarse-grained model

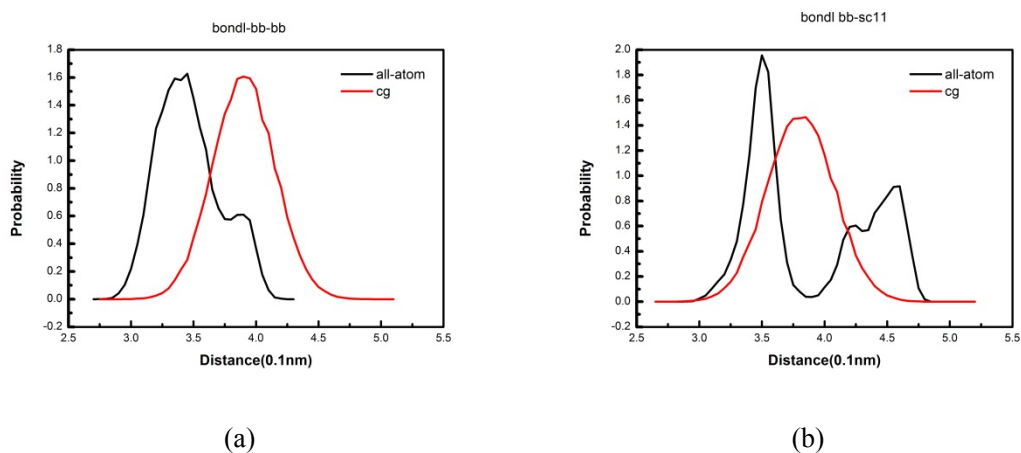

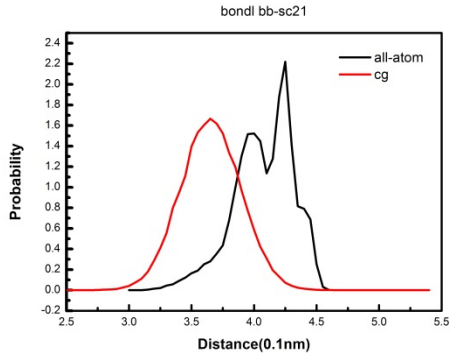

(c)

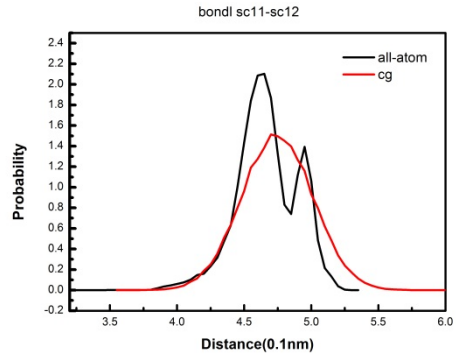

(d)

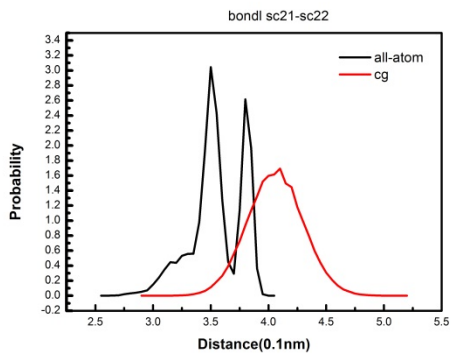

(e)

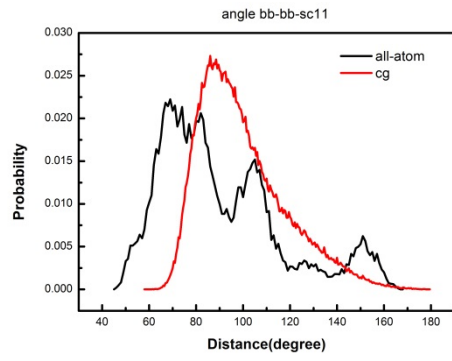

(f)

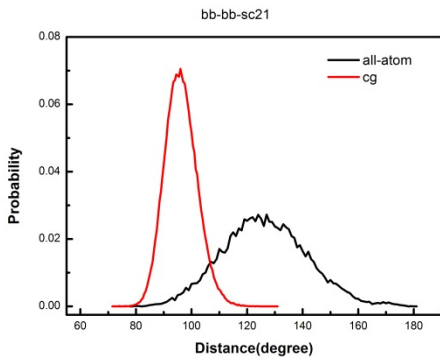

(g)

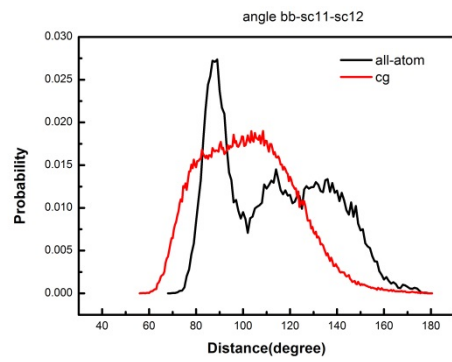

(h)

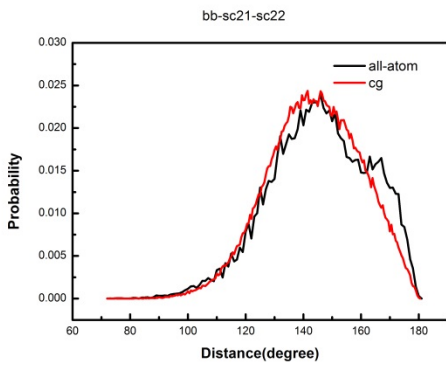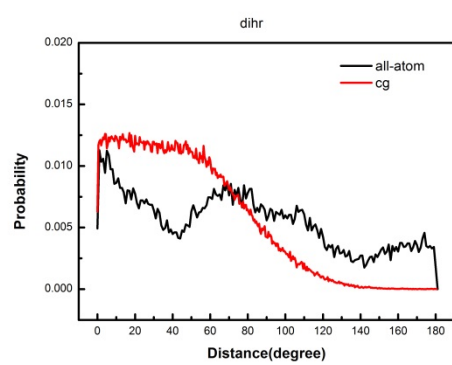

(i)

(j)

Figure S2. Comparison of important parameters obtained from all-atom model and coarse-grained model of PMAL

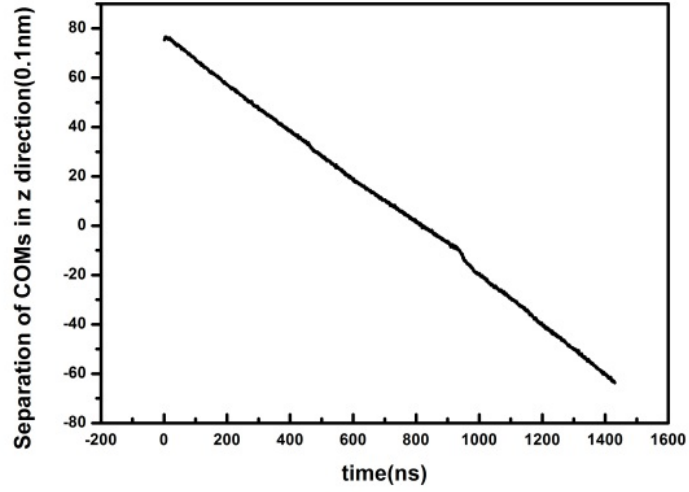

Figure S3. Distance between COMs of PMAL-SiRNA complex and lipid bilayer with applied force time
